# Supplementary material for: Complementary crosstalk between palmitoylation and phosphorylation events in MTIP regulates its role during Plasmodium falciparum invasion
Source: Front Cell Infect Microbiol. 2022 Sep 29;12:924424. doi: 10.3389/fcimb.2022.924424 (PMC9556994; doi:10.3389/fcimb.2022.924424)
Supplement: Supplementary Table 1 — Total proteome of Plasmodium falciparum 3D7 cataloged for the study. [file Table_1.xlsx]

## Sheet: PF3D7_Proteome
Protein Description							PlasmoDB Annotations
Protein	Isoform	Gene Name or Symbol	Organism	Genomic Coordinates (Gene)	Protein Product	Gene Type	Curated GO Components	Curated GO Functions	Curated GO Processes	PFam ID
PF3D7_0100100	PF3D7_0100100.1	VAR	Plasmodium falciparum 3D7	Pf3D7_01_v3:29,510..37,126(+)	erythrocyte membrane protein 1, PfEMP1	protein coding gene	host cell plasma membrane;infected host cell surface knob	cell adhesion molecule binding	antigenic variation;cell-cell adhesion;cytoadherence to microvasculature, mediated by symbiont protein;modulation by symbiont of host erythrocyte aggregation	PF03011;PF05424;PF15445;PF15447;PF18562
PF3D7_0100200	PF3D7_0100200.1	RIF	Plasmodium falciparum 3D7	Pf3D7_01_v3:38,982..40,207(-)	rifin	protein coding gene	Maurer's cleft;host cell plasma membrane;symbiont-containing vacuole	N/A	antigenic variation;cytoadherence to microvasculature, mediated by symbiont protein;modulation by symbiont of host erythrocyte aggregation	PF02009
PF3D7_0100300	PF3D7_0100300.1	VAR	Plasmodium falciparum 3D7	Pf3D7_01_v3:42,367..46,507(-)	erythrocyte membrane protein 1, PfEMP1	protein coding gene	N/A	N/A	N/A	PF05424;PF15445;PF15447
PF3D7_0100400	PF3D7_0100400.1	RIF	Plasmodium falciparum 3D7	Pf3D7_01_v3:50,363..51,636(+)	rifin	protein coding gene	Maurer's cleft;host cell plasma membrane;symbiont-containing vacuole	host cell surface binding	antigenic variation;cytoadherence to microvasculature, mediated by symbiont protein;modulation by symbiont of host erythrocyte aggregation	PF02009
PF3D7_0100600	PF3D7_0100600.1	RIF	Plasmodium falciparum 3D7	Pf3D7_01_v3:53,778..55,006(-)	rifin	protein coding gene	host cell plasma membrane	N/A	antigenic variation	PF02009
PF3D7_0100700	PF3D7_0100700.1	N/A	Plasmodium falciparum 3D7	Pf3D7_01_v3:56,690..56,893(-)	Plasmodium exported protein, unknown function, fragment	protein coding gene	N/A	N/A	N/A	PF09687
PF3D7_0100800	PF3D7_0100800.1	RIF	Plasmodium falciparum 3D7	Pf3D7_01_v3:59,772..61,003(+)	rifin	protein coding gene	Maurer's cleft;host cell plasma membrane;symbiont-containing vacuole	N/A	antigenic variation;cytoadherence to microvasculature, mediated by symbiont protein;modulation by symbiont of host erythrocyte aggregation	PF02009
PF3D7_0100900	PF3D7_0100900.1	RIF	Plasmodium falciparum 3D7	Pf3D7_01_v3:62,187..63,400(-)	rifin	protein coding gene	Maurer's cleft;host cell plasma membrane;symbiont-containing vacuole	N/A	antigenic variation;cytoadherence to microvasculature, mediated by symbiont protein;modulation by symbiont of host erythrocyte aggregation	PF02009
PF3D7_0101000	PF3D7_0101000.1	RIF	Plasmodium falciparum 3D7	Pf3D7_01_v3:65,817..66,989(-)	rifin	protein coding gene	Maurer's cleft;host cell plasma membrane;symbiont-containing vacuole	N/A	antigenic variation;cytoadherence to microvasculature, mediated by symbiont protein;modulation by symbiont of host erythrocyte aggregation	PF02009
PF3D7_0101100	PF3D7_0101100.1	EPF4	Plasmodium falciparum 3D7	Pf3D7_01_v3:69,304..70,417(-)	exported protein family 4	protein coding gene	Maurer's cleft	N/A	N/A	N/A
PF3D7_0101200	PF3D7_0101200.1	EPF3	Plasmodium falciparum 3D7	Pf3D7_01_v3:71,624..72,426(+)	exported protein family 3	protein coding gene	Maurer's cleft;host cell cytoplasm	N/A	N/A	PF09715
PF3D7_0101300	PF3D7_0101300.1	MC-2TM	Plasmodium falciparum 3D7	Pf3D7_01_v3:74,295..75,622(+)	Pfmc-2TM Maurer's cleft two transmembrane protein	protein coding gene	Maurer's cleft;integral component of membrane	N/A	translocation of peptides or proteins into host	N/A
PF3D7_0101600	PF3D7_0101600.1	RIF	Plasmodium falciparum 3D7	Pf3D7_01_v3:81,765..83,106(-)	rifin	protein coding gene	Maurer's cleft;host cell plasma membrane;symbiont-containing vacuole	N/A	antigenic variation;cytoadherence to microvasculature, mediated by symbiont protein;modulation by symbiont of host erythrocyte aggregation	PF02009
PF3D7_0101800	PF3D7_0101800.1	N/A	Plasmodium falciparum 3D7	Pf3D7_01_v3:87,203..88,177(-)	stevor	protein coding gene	Maurer's cleft	N/A	modulation by symbiont of host erythrocyte aggregation	PF17410
PF3D7_0101900	PF3D7_0101900.1	RIF	Plasmodium falciparum 3D7	Pf3D7_01_v3:90,242..91,420(-)	rifin	protein coding gene	host cell plasma membrane	N/A	antigenic variation	PF02009
PF3D7_0102200	PF3D7_0102200.1	RESA	Plasmodium falciparum 3D7	Pf3D7_01_v3:97,590..103,615(+)	ring-infected erythrocyte surface antigen	protein coding gene	extracellular vesicle;food vacuole;host cell plasma membrane;host cell surface;merozoite dense granule;symbiont-containing vacuole	protein binding	regulation of immune response	PF00226;PF09687;PF14308
PF3D7_0102300	PF3D7_0102300.1	N/A	Plasmodium falciparum 3D7	Pf3D7_01_v3:104,058..105,792(+)	Plasmodium exported protein, unknown function	protein coding gene	apicoplast;host cell	N/A	N/A	N/A
PF3D7_0102500	PF3D7_0102500.1	EBA181	Plasmodium falciparum 3D7	Pf3D7_01_v3:109,005..117,516(-)	erythrocyte binding antigen-181	protein coding gene	extracellular vesicle;microneme	heparin binding;sialic acid binding	cell-cell adhesion;entry into host	PF05424;PF11556
PF3D7_0102600	PF3D7_0102600.1	FIKK1	Plasmodium falciparum 3D7	Pf3D7_01_v3:118,812..122,534(-)	serine/threonine protein kinase, FIKK family	protein coding gene	Maurer's cleft;cytoplasm;nucleus	protein serine/threonine kinase activity	intracellular signal transduction;modulation by symbiont of host process;protein phosphorylation	PF00069
PF3D7_0102700	PF3D7_0102700.1	MaTrA	Plasmodium falciparum 3D7	Pf3D7_01_v3:124,394..126,213(+)	merozoite-associated tryptophan-rich antigen	protein coding gene	cell surface	N/A	N/A	PF12319
PF3D7_0102800	PF3D7_0102800.1	N/A	Plasmodium falciparum 3D7	Pf3D7_01_v3:125,835..128,373(-)	seipin domain-containing protein, putative	protein coding gene	N/A	N/A	N/A	PF06775
PF3D7_0102900	PF3D7_0102900.1	N/A	Plasmodium falciparum 3D7	Pf3D7_01_v3:128,569..131,554(-)	aspartate--tRNA ligase	protein coding gene	aminoacyl-tRNA synthetase multienzyme complex;cytosol;nucleus	RNA binding;aspartate-tRNA ligase activity;protein homodimerization activity	aspartyl-tRNA aminoacylation	PF00152;PF01336
PF3D7_0103000	PF3D7_0103000.1	N/A	Plasmodium falciparum 3D7	Pf3D7_01_v3:131,609..134,133(-)	vacuolar protein sorting-associated protein VTA1, putative	protein coding gene	multivesicular body	N/A	late endosome to vacuole transport via multivesicular body sorting pathway	PF04652;PF18097
PF3D7_0103100	PF3D7_0103100.1	VPS51	Plasmodium falciparum 3D7	Pf3D7_01_v3:134,155..140,371(-)	vacuolar protein sorting-associated protein 51, putative	protein coding gene	EARP complex;GARP complex;Golgi apparatus;membrane	N/A	Golgi organization;Golgi vesicle transport;endocytic recycling;lysosomal transport;protein transport;retrograde transport, endosome to Golgi	PF08700
PF3D7_0103200	PF3D7_0103200.1	NT4	Plasmodium falciparum 3D7	Pf3D7_01_v3:140,494..143,049(-)	nucleoside transporter 4	protein coding gene	integral component of membrane	purine nucleobase transmembrane transporter activity;purine nucleoside transmembrane transporter activity	purine nucleobase transport;purine nucleoside transmembrane transport	N/A
PF3D7_0103300	PF3D7_0103300.1	N/A	Plasmodium falciparum 3D7	Pf3D7_01_v3:143,389..146,959(-)	conserved protein, unknown function	protein coding gene	N/A	N/A	N/A	N/A
PF3D7_0103400	PF3D7_0103400.1	N/A	Plasmodium falciparum 3D7	Pf3D7_01_v3:147,031..152,795(-)	zinc-carboxypeptidase, putative	protein coding gene	N/A	N/A	N/A	N/A
PF3D7_0103500	PF3D7_0103500.1	N/A	Plasmodium falciparum 3D7	Pf3D7_01_v3:153,669..160,630(+)	conserved Plasmodium protein, unknown function	protein coding gene	N/A	N/A	N/A	N/A
PF3D7_0103600	PF3D7_0103600.1	PSH1	Plasmodium falciparum 3D7	Pf3D7_01_v3:160,673..166,273(+)	ATP-dependent DNA/RNA helicase PSH1	protein coding gene	apicoplast;cytoplasm;nucleolus;nucleus	3'-5' DNA helicase activity;5'-3' DNA helicase activity;ATP hydrolysis activity;RNA helicase activity	N/A	PF00270;PF00271
PF3D7_0103700	PF3D7_0103700.1	PSTK	Plasmodium falciparum 3D7	Pf3D7_01_v3:166,497..168,687(+)	L-seryl-tRNA(Sec) kinase, putative	protein coding gene	N/A	kinase activity;tRNA binding	N/A	N/A
PF3D7_0103800	PF3D7_0103800.1	ARP1	Plasmodium falciparum 3D7	Pf3D7_01_v3:168,768..171,442(-)	actin-related protein ARP1, putative	protein coding gene	Maurer's cleft;apical part of cell;dynactin complex	structural constituent of cytoskeleton	N/A	PF00022
PF3D7_0103900	PF3D7_0103900.1	PIESP15	Plasmodium falciparum 3D7	Pf3D7_01_v3:172,470..175,055(+)	parasite-infected erythrocyte surface protein	protein coding gene	COPII-coated ER to Golgi transport vesicle;Golgi membrane;endoplasmic reticulum membrane;endoplasmic reticulum-Golgi intermediate compartment	mannose binding;protein binding	Golgi organization;endoplasmic reticulum organization;endoplasmic reticulum to Golgi vesicle-mediated transport	PF03388
PF3D7_0104000	PF3D7_0104000.1	TRSP	Plasmodium falciparum 3D7	Pf3D7_01_v3:175,609..176,376(+)	thrombospondin-related sporozoite protein	protein coding gene	cell surface	N/A	entry into host	PF19035
PF3D7_0104100	PF3D7_0104100.1	N/A	Plasmodium falciparum 3D7	Pf3D7_01_v3:177,187..181,825(+)	protein E140, putative	protein coding gene	apical part of cell;basal part of cell;cell surface;integral component of membrane;symbiont-containing vacuole membrane	N/A	modulation by symbiont of host immune response	N/A
PF3D7_0104200	PF3D7_0104200.1	N/A	Plasmodium falciparum 3D7	Pf3D7_01_v3:182,205..184,820(-)	StAR-related lipid transfer protein	protein coding gene	host cell cytosol;integral component of membrane;symbiont-containing vacuole	phosphatidylcholine transporter activity;phosphatidylinositol transfer activity	negative regulation of phospholipid transport;phospholipid transport	N/A
PF3D7_0104300	PF3D7_0104300.1	UBP1	Plasmodium falciparum 3D7	Pf3D7_01_v3:188,420..201,324(+)	ubiquitin carboxyl-terminal hydrolase 1, putative	protein coding gene	cytosol;nucleus;proteasome complex	cysteine-type endopeptidase activity;thiol-dependent deubiquitinase	endocytosis;protein deubiquitination;response to xenobiotic stimulus;ubiquitin-dependent protein catabolic process	N/A
PF3D7_0104400	PF3D7_0104400.1	LytB	Plasmodium falciparum 3D7	Pf3D7_01_v3:201,354..204,250(+)	4-hydroxy-3-methylbut-2-enyl diphosphate reductase	protein coding gene	apicoplast	4-hydroxy-3-methylbut-2-en-1-yl diphosphate reductase activity	isopentenyl diphosphate biosynthetic process, methylerythritol 4-phosphate pathway	PF02401
PF3D7_0104500	PF3D7_0104500.1	N/A	Plasmodium falciparum 3D7	Pf3D7_01_v3:204,368..205,612(-)	conserved protein, unknown function	protein coding gene	N/A	N/A	N/A	PF11539
PF3D7_0104600	PF3D7_0104600.1	N/A	Plasmodium falciparum 3D7	Pf3D7_01_v3:205,812..210,273(+)	conserved Plasmodium protein, unknown function	protein coding gene	N/A	N/A	N/A	N/A
PF3D7_0104700	PF3D7_0104700.1	MFR2	Plasmodium falciparum 3D7	Pf3D7_01_v3:210,870..213,005(+)	major facilitator superfamily-related transporter, putative	protein coding gene	integral component of membrane;plasma membrane	N/A	N/A	N/A
PF3D7_0104800	PF3D7_0104800.1	NPT1	Plasmodium falciparum 3D7	Pf3D7_01_v3:215,143..217,616(+)	novel putative transporter 1, putative	protein coding gene	cell periphery;integral component of membrane;plasma membrane	arginine transmembrane transporter activity	arginine transport;lysine transport	N/A
PF3D7_0105100	PF3D7_0105100.1	N/A	Plasmodium falciparum 3D7	Pf3D7_01_v3:220,727..221,928(+)	conserved Apicomplexan protein, unknown function	protein coding gene	N/A	N/A	N/A	N/A
PF3D7_0105200	PF3D7_0105200.1	N/A	Plasmodium falciparum 3D7	Pf3D7_01_v3:222,086..224,501(-)	heptatricopeptide repeat and RAP domain-containing protein, putative	protein coding gene	mitochondrion	mRNA binding	N/A	PF08373
PF3D7_0105300	PF3D7_0105300.1	CAP	Plasmodium falciparum 3D7	Pf3D7_01_v3:224,638..226,017(-)	cyclase-associated protein	protein coding gene	cortical actin cytoskeleton	actin binding;actin monomer binding;adenylate cyclase binding;protein dimerization activity	actin polymerization or depolymerization;cell morphogenesis;establishment or maintenance of cell polarity;regulation of adenylate cyclase activity	PF08603
PF3D7_0105400	PF3D7_0105400.1	N/A	Plasmodium falciparum 3D7	Pf3D7_01_v3:226,036..227,419(-)	conserved Plasmodium protein, unknown function	protein coding gene	N/A	N/A	N/A	N/A
PF3D7_0105400	PF3D7_0105400.2	N/A	Plasmodium falciparum 3D7	Pf3D7_01_v3:226,036..227,419(-)	conserved Plasmodium protein, unknown function	protein coding gene	N/A	N/A	N/A	N/A
PF3D7_0105500	PF3D7_0105500.1	N/A	Plasmodium falciparum 3D7	Pf3D7_01_v3:228,485..229,519(-)	conserved protein, unknown function	protein coding gene	mitochondrion	N/A	N/A	N/A
PF3D7_0105600	PF3D7_0105600.1	N/A	Plasmodium falciparum 3D7	Pf3D7_01_v3:229,943..234,464(-)	FtsJ-like methyltransferase, putative	protein coding gene	cytoplasm;nucleus	mRNA (nucleoside-2'-O-)-methyltransferase activity	7-methylguanosine mRNA capping;cap1 mRNA methylation	PF01728
PF3D7_0105700	PF3D7_0105700.1	N/A	Plasmodium falciparum 3D7	Pf3D7_01_v3:236,742..248,183(+)	asparagine-rich antigen Pfa35-2	protein coding gene	Set1C/COMPASS complex;nucleus	mRNA binding	histone H3-K4 methylation	N/A
PF3D7_0105800	PF3D7_0105800.1	N/A	Plasmodium falciparum 3D7	Pf3D7_01_v3:248,434..253,057(-)	cyclin-dependent kinases regulatory subunit, putative	protein coding gene	nucleus	N/A	N/A	PF01111
PF3D7_0105900	PF3D7_0105900.1	N/A	Plasmodium falciparum 3D7	Pf3D7_01_v3:253,089..255,771(+)	3'-5' exonuclease, putative	protein coding gene	cytoplasm;nucleus	3'-5' exonuclease activity;DNA binding	N/A	PF01612
PF3D7_0106000	PF3D7_0106000.1	N/A	Plasmodium falciparum 3D7	Pf3D7_01_v3:255,113..258,624(-)	conserved protein, unknown function	protein coding gene	N/A	N/A	N/A	N/A
PF3D7_0106100	PF3D7_0106100.1	N/A	Plasmodium falciparum 3D7	Pf3D7_01_v3:260,105..262,008(-)	V-type proton ATPase subunit C, putative	protein coding gene	mitochondrial proton-transporting ATP synthase complex;nucleus;vacuolar proton-transporting V-type ATPase, V1 domain	P-type proton-exporting transporter activity;proton-transporting ATPase activity, rotational mechanism	ATP synthesis coupled proton transport	PF03223
PF3D7_0106200	PF3D7_0106200.1	N/A	Plasmodium falciparum 3D7	Pf3D7_01_v3:262,750..264,323(-)	EF hand domain-containing protein, putative	protein coding gene	N/A	N/A	N/A	N/A
PF3D7_0106300	PF3D7_0106300.1	ATP6	Plasmodium falciparum 3D7	Pf3D7_01_v3:264,487..270,234(-)	calcium-transporting ATPase	protein coding gene	N/A	ATP hydrolysis activity;P-type calcium transporter activity;P-type proton-exporting transporter activity;RNA binding	calcium ion transmembrane transport;calcium ion transport;cellular calcium ion homeostasis;response to drug;response to xenobiotic stimulus	PF00122;PF00689;PF00690;PF13246
PF3D7_0106400	PF3D7_0106400.1	N/A	Plasmodium falciparum 3D7	Pf3D7_01_v3:272,296..273,701(+)	pre-rRNA-processing protein TSR2, putative	protein coding gene	N/A	N/A	maturation of SSU-rRNA from tricistronic rRNA transcript (SSU-rRNA, 5.8S rRNA, LSU-rRNA)	PF10273
PF3D7_0106500	PF3D7_0106500.1	N/A	Plasmodium falciparum 3D7	Pf3D7_01_v3:274,094..278,747(+)	conserved Plasmodium protein, unknown function	protein coding gene	N/A	N/A	N/A	N/A
PF3D7_0106600	PF3D7_0106600.1	N/A	Plasmodium falciparum 3D7	Pf3D7_01_v3:279,115..280,014(+)	conserved Plasmodium protein, unknown function	protein coding gene	host cell periphery	N/A	N/A	N/A
PF3D7_0106700	PF3D7_0106700.1	AARP2	Plasmodium falciparum 3D7	Pf3D7_01_v3:280,595..285,875(+)	small ribosomal subunit assembling AARP2 protein	protein coding gene	90S preribosome;plasma membrane	GTP binding;GTPase activity;U3 snoRNA binding	endonucleolytic cleavage of tricistronic rRNA transcript (SSU-rRNA, 5.8S rRNA, LSU-rRNA);maturation of SSU-rRNA from tricistronic rRNA transcript (SSU-rRNA, 5.8S rRNA, LSU-rRNA)	PF04950;PF08142
PF3D7_0106800	PF3D7_0106800.1	RAB5c	Plasmodium falciparum 3D7	Pf3D7_01_v3:286,637..289,063(+)	ras-related protein Rab-5C	protein coding gene	cytosol;endocytic vesicle;endomembrane system;endosome	GTPase activity	intracellular protein transport;small GTPase mediated signal transduction	PF00071
PF3D7_0106900	PF3D7_0106900.1	IspD	Plasmodium falciparum 3D7	Pf3D7_01_v3:289,849..292,802(+)	2-C-methyl-D-erythritol 4-phosphate cytidylyltransferase, putative	protein coding gene	apicoplast	2-C-methyl-D-erythritol 4-phosphate cytidylyltransferase activity	cellular response to drug;response to xenobiotic stimulus	PF01128
PF3D7_0107000	PF3D7_0107000.1	CEN1	Plasmodium falciparum 3D7	Pf3D7_01_v3:293,262..295,139(+)	centrin-1	protein coding gene	centriole;centrosome	calcium ion binding	centriole replication;mitotic cell cycle	PF13499
PF3D7_0107100	PF3D7_0107100.1	N/A	Plasmodium falciparum 3D7	Pf3D7_01_v3:295,177..296,959(-)	conserved protein, unknown function	protein coding gene	N/A	N/A	N/A	N/A
PF3D7_0107200	PF3D7_0107200.1	CCR4-3	Plasmodium falciparum 3D7	Pf3D7_01_v3:297,189..299,513(+)	CCR4 domain-containing protein 3, putative	protein coding gene	nucleus	nuclease activity	N/A	PF03372
PF3D7_0107300	PF3D7_0107300.1	N/A	Plasmodium falciparum 3D7	Pf3D7_01_v3:299,464..301,151(-)	conserved Plasmodium protein, unknown function	protein coding gene	N/A	N/A	N/A	N/A
PF3D7_0107400	PF3D7_0107400.1	ATPk	Plasmodium falciparum 3D7	Pf3D7_01_v3:302,509..304,236(+)	ATP synthase-associated protein, putative	protein coding gene	mitochondrion	N/A	N/A	N/A
PF3D7_0107500	PF3D7_0107500.1	NCR1	Plasmodium falciparum 3D7	Pf3D7_01_v3:303,437..311,928(-)	Niemann-Pick type C1-related protein	protein coding gene	integral component of membrane;membrane;plasma membrane	N/A	lipid homeostasis;response to drug;response to xenobiotic stimulus	PF02460
PF3D7_0107600	PF3D7_0107600.1	eIK2	Plasmodium falciparum 3D7	Pf3D7_01_v3:313,824..319,525(+)	eukaryotic translation initiation factor 2-alpha kinase 2, putative	protein coding gene	cytosolic ribosome	ATP binding;eukaryotic translation initiation factor 2alpha kinase activity;protein kinase activity	protein phosphorylation;regulation of translational initiation by eIF2 alpha phosphorylation	PF00069
PF3D7_0107700	PF3D7_0107700.1	N/A	Plasmodium falciparum 3D7	Pf3D7_01_v3:320,168..321,508(+)	dolichyl-diphosphooligosaccharide--protein glycosyltransferase subunit OST3/OST6, putative	protein coding gene	apicoplast;cell surface;host cell cytosol;host cell membrane;oligosaccharyltransferase complex	dolichyl-diphosphooligosaccharide-protein glycotransferase activity	protein N-linked glycosylation via asparagine	PF04756
PF3D7_0107800	PF3D7_0107800.1	MRE11	Plasmodium falciparum 3D7	Pf3D7_01_v3:321,757..326,180(+)	double-strand break repair protein MRE11	protein coding gene	Mre11 complex;nucleus;site of double-strand break	nuclease activity;protein binding;single-stranded DNA endodeoxyribonuclease activity	DNA repair;double-strand break repair via homologous recombination;double-strand break repair via nonhomologous end joining;meiotic DNA double-strand break formation;mitochondrial double-strand break repair via homologous recombination;mitotic G2 DNA damage checkpoint signaling;telomere maintenance	PF04152
PF3D7_0107900	PF3D7_0107900.1	N/A	Plasmodium falciparum 3D7	Pf3D7_01_v3:326,323..327,365(-)	conserved Plasmodium protein, unknown function	protein coding gene	apicoplast	N/A	N/A	N/A
PF3D7_0108000	PF3D7_0108000.1	N/A	Plasmodium falciparum 3D7	Pf3D7_01_v3:328,171..329,995(-)	proteasome subunit beta type-3, putative	protein coding gene	cytoplasm;nucleus;proteasome core complex;proteasome core complex, beta-subunit complex	endopeptidase activity	proteasomal protein catabolic process;proteasomal ubiquitin-independent protein catabolic process;proteasome-mediated ubiquitin-dependent protein catabolic process;ubiquitin-dependent protein catabolic process	PF00227
PF3D7_0108100	PF3D7_0108100.1	N/A	Plasmodium falciparum 3D7	Pf3D7_01_v3:330,597..332,834(+)	conserved protein, unknown function	protein coding gene	mitochondrion	N/A	N/A	N/A
PF3D7_0108300	PF3D7_0108300.1	ARP	Plasmodium falciparum 3D7	Pf3D7_01_v3:334,374..344,369(+)	conserved Plasmodium protein, unknown function	protein coding gene	host cell cytoplasm;host cell surface	mRNA binding	N/A	N/A
PF3D7_0108400	PF3D7_0108400.1	N/A	Plasmodium falciparum 3D7	Pf3D7_01_v3:344,373..347,320(-)	mitochondrial carrier protein, putative	protein coding gene	N/A	N/A	response to xenobiotic stimulus	PF00153
PF3D7_0108400	PF3D7_0108400.2	N/A	Plasmodium falciparum 3D7	Pf3D7_01_v3:344,373..347,320(-)	mitochondrial carrier protein, putative	protein coding gene	N/A	N/A	N/A	PF00153
PF3D7_0108500	PF3D7_0108500.1	N/A	Plasmodium falciparum 3D7	Pf3D7_01_v3:347,246..350,568(+)	ELM2 domain-containing protein, putative	protein coding gene	Maurer's cleft;nucleus	N/A	N/A	N/A
PF3D7_0108600	PF3D7_0108600.1	N/A	Plasmodium falciparum 3D7	Pf3D7_01_v3:348,892..351,747(-)	DnaJ domain-containing protein, putative	protein coding gene	Maurer's cleft;mitochondrion	N/A	N/A	N/A
PF3D7_0108700	PF3D7_0108700.1	PSOP24	Plasmodium falciparum 3D7	Pf3D7_01_v3:351,787..356,984(-)	secreted ookinete protein, putative	protein coding gene	apicoplast	N/A	N/A	N/A
PF3D7_0108800	PF3D7_0108800.1	N/A	Plasmodium falciparum 3D7	Pf3D7_01_v3:357,279..360,804(+)	mitochondrial carrier protein, putative	protein coding gene	N/A	N/A	N/A	PF00153
PF3D7_0109000	PF3D7_0109000.1	PHIL1	Plasmodium falciparum 3D7	Pf3D7_01_v3:362,217..365,209(+)	photosensitized INA-labeled protein PHIL1	protein coding gene	inner membrane pellicle complex	protein binding	N/A	N/A
PF3D7_0109100	PF3D7_0109100.1	CCp5	Plasmodium falciparum 3D7	Pf3D7_01_v3:365,266..369,336(+)	LCCL domain-containing protein	protein coding gene	crystalloid;endoplasmic reticulum lumen	N/A	N/A	PF03815;PF07691
PF3D7_0109200	PF3D7_0109200.1	CFIM25	Plasmodium falciparum 3D7	Pf3D7_01_v3:369,251..370,907(-)	cleavage and polyadenylation specificity factor subunit 5, putative	protein coding gene	mRNA cleavage factor complex	RNA binding;mRNA binding	mRNA processing	PF13869
PF3D7_0109300	PF3D7_0109300.1	N/A	Plasmodium falciparum 3D7	Pf3D7_01_v3:371,146..373,063(-)	elongation of fatty acids protein, putative	protein coding gene	endoplasmic reticulum;integral component of endoplasmic reticulum membrane;plasma membrane	fatty acid elongase activity	fatty acid elongation, monounsaturated fatty acid;fatty acid elongation, polyunsaturated fatty acid;fatty acid elongation, saturated fatty acid;sphingolipid biosynthetic process;very long-chain fatty acid biosynthetic process	PF01151
PF3D7_0109400	PF3D7_0109400.1	N/A	Plasmodium falciparum 3D7	Pf3D7_01_v3:373,864..375,683(-)	tubulin-specific chaperone a, putative	protein coding gene	cytosol;microtubule cytoskeleton	tubulin binding;unfolded protein binding	protein folding;protein-containing complex assembly;tubulin complex assembly	PF02970
PF3D7_0109500	PF3D7_0109500.1	N/A	Plasmodium falciparum 3D7	Pf3D7_01_v3:376,164..377,704(-)	N-acetyltransferase, GNAT family, putative	protein coding gene	NatB complex	N-acetyltransferase activity;peptide alpha-N-acetyltransferase activity	N-terminal peptidyl-methionine acetylation;N-terminal protein amino acid acetylation	PF08445
PF3D7_0109600	PF3D7_0109600.1	CoSP	Plasmodium falciparum 3D7	Pf3D7_01_v3:377,795..378,599(-)	cold-shock protein, putative	protein coding gene	cytoplasm	double-stranded DNA binding;mRNA 3'-UTR binding	intracellular signal transduction;regulation of mRNA stability;regulation of transcription, DNA-templated	PF00313
PF3D7_0109700	PF3D7_0109700.1	RRP36	Plasmodium falciparum 3D7	Pf3D7_01_v3:378,653..380,086(-)	rRNA biogenesis protein RRP36, putative	protein coding gene	90S preribosome;nucleolus	N/A	maturation of SSU-rRNA from tricistronic rRNA transcript (SSU-rRNA, 5.8S rRNA, LSU-rRNA)	PF06102
PF3D7_0109800	PF3D7_0109800.1	cPheRS	Plasmodium falciparum 3D7	Pf3D7_01_v3:380,254..382,568(+)	phenylalanine--tRNA ligase alpha subunit	protein coding gene	cytoplasm;cytosol;nucleus;phenylalanine-tRNA ligase complex	phenylalanine-tRNA ligase activity	phenylalanyl-tRNA aminoacylation;response to xenobiotic stimulus	PF01409
PF3D7_0109850	PF3D7_0109850.1	N/A	Plasmodium falciparum 3D7	Pf3D7_01_v3:383,092..386,632(+)	phosphatidate cytidylyltransferase, putative	protein coding gene	apicoplast;integral component of endoplasmic reticulum membrane;integral component of membrane	dolichol kinase activity	dolichyl monophosphate biosynthetic process	N/A
PF3D7_0109950	PF3D7_0109950.1	C2AP3	Plasmodium falciparum 3D7	Pf3D7_01_v3:386,708..388,186(+)	respiratory chain complex 2 associated protein 3	protein coding gene	mitochondrion;respiratory chain complex II	N/A	N/A	N/A
PF3D7_0110000	PF3D7_0110000.1	N/A	Plasmodium falciparum 3D7	Pf3D7_01_v3:388,192..389,559(+)	conserved Plasmodium protein, unknown function	protein coding gene	N/A	N/A	N/A	N/A
PF3D7_0110100	PF3D7_0110100.1	SELB	Plasmodium falciparum 3D7	Pf3D7_01_v3:388,887..392,185(-)	selenocysteine-specific elongation factor, putative	protein coding gene	N/A	translation elongation factor activity	selenocysteine incorporation;translational elongation	PF00009
PF3D7_0110200	PF3D7_0110200.1	ERV1	Plasmodium falciparum 3D7	Pf3D7_01_v3:392,323..393,620(+)	FAD-linked sulfhydryl oxidase ERV1, putative	protein coding gene	mitochondrion	flavin adenine dinucleotide binding;flavin-linked sulfhydryl oxidase activity;protein-disulfide reductase activity	cell population proliferation	PF04777
PF3D7_0110400	PF3D7_0110400.1	RPB9	Plasmodium falciparum 3D7	Pf3D7_01_v3:393,695..395,222(-)	DNA-directed RNA polymerase II subunit RPB9, putative	protein coding gene	RNA polymerase II, core complex;nucleus	DNA-directed 5'-3' RNA polymerase activity	maintenance of transcriptional fidelity during DNA-templated transcription elongation from RNA polymerase II promoter;transcription by RNA polymerase II;transcription initiation from RNA polymerase II promoter;transcription-coupled nucleotide-excision repair	PF02150
PF3D7_0110500	PF3D7_0110500.1	BDP3	Plasmodium falciparum 3D7	Pf3D7_01_v3:396,580..403,838(+)	bromodomain protein 3, putative	protein coding gene	NuA4 histone acetyltransferase complex;nucleus	N/A	histone acetylation	N/A
PF3D7_0110600	PF3D7_0110600.1	PIP5K	Plasmodium falciparum 3D7	Pf3D7_01_v3:405,007..412,453(+)	phosphatidylinositol-4-phosphate 5-kinase	protein coding gene	N/A	1-phosphatidylinositol-4-phosphate 5-kinase activity;phosphotransferase activity, alcohol group as acceptor	phosphatidylinositol phosphate biosynthetic process;response to xenobiotic stimulus	PF01504
PF3D7_0110700	PF3D7_0110700.1	CAF1C	Plasmodium falciparum 3D7	Pf3D7_01_v3:413,076..417,001(-)	chromatin assembly factor 1 subunit C, putative	protein coding gene	nucleus	histone binding;unfolded protein binding	chromatin assembly;nucleosome assembly	PF00400;PF12265
PF3D7_0110800	PF3D7_0110800.1	N/A	Plasmodium falciparum 3D7	Pf3D7_01_v3:417,254..420,218(+)	transcription initiation factor TFIIB, putative	protein coding gene	nucleus;transcription preinitiation complex;transcription regulator complex	RNA polymerase II complex binding;RNA polymerase II complex recruiting activity;RNA polymerase II core promoter sequence-specific DNA binding;TBP-class protein binding;transcription factor binding	DNA-templated transcription, initiation;RNA polymerase II preinitiation complex assembly;transcription initiation from RNA polymerase II promoter;transcriptional start site selection at RNA polymerase II promoter	PF08271
PF3D7_0110900	PF3D7_0110900.1	AKLP1	Plasmodium falciparum 3D7	Pf3D7_01_v3:419,727..420,942(-)	adenylate kinase-like protein 1	protein coding gene	cytoplasm;cytosol;nucleus	ATP binding;adenylate kinase activity	N/A	PF13238
PF3D7_0111000	PF3D7_0111000.1	N/A	Plasmodium falciparum 3D7	Pf3D7_01_v3:421,025..428,878(-)	kinesin-8B, putative	protein coding gene	cytoplasm;cytoplasmic microtubule;kinesin complex;microtubule	ATP hydrolysis activity;microtubule binding;microtubule motor activity;plus-end-directed microtubule motor activity	axoneme assembly;cilium assembly;microtubule-based movement	PF00225
PF3D7_0111200	PF3D7_0111200.1	N/A	Plasmodium falciparum 3D7	Pf3D7_01_v3:429,849..430,879(-)	conserved protein, unknown function	protein coding gene	mitochondrion	N/A	N/A	N/A
PF3D7_0111300	PF3D7_0111300.1	N/A	Plasmodium falciparum 3D7	Pf3D7_01_v3:431,167..436,457(-)	P-loop containing nucleoside triphosphate hydrolase, putative	protein coding gene	DNA replication factor C complex;nucleus	DNA binding	DNA replication	PF00004
PF3D7_0111400	PF3D7_0111400.1	GEXP19	Plasmodium falciparum 3D7	Pf3D7_01_v3:436,179..439,368(+)	conserved Plasmodium protein, unknown function	protein coding gene	N/A	N/A	N/A	N/A
PF3D7_0111500	PF3D7_0111500.1	N/A	Plasmodium falciparum 3D7	Pf3D7_01_v3:439,395..442,195(-)	UMP-CMP kinase, putative	protein coding gene	apicoplast;cytoplasm;nucleus	UMP kinase activity;cytidylate kinase activity;nucleoside diphosphate kinase activity;uridine kinase activity	CDP biosynthetic process;UDP biosynthetic process;nucleoside diphosphate phosphorylation;purine nucleotide metabolic process;pyrimidine nucleotide biosynthetic process	PF00406
PF3D7_0111600	PF3D7_0111600.1	N/A	Plasmodium falciparum 3D7	Pf3D7_01_v3:442,380..443,473(-)	conserved Plasmodium protein, unknown function	protein coding gene	N/A	N/A	N/A	N/A
PF3D7_0111700	PF3D7_0111700.1	N/A	Plasmodium falciparum 3D7	Pf3D7_01_v3:443,476..444,682(-)	conserved protein, unknown function	protein coding gene	N/A	N/A	N/A	N/A
PF3D7_0111800	PF3D7_0111800.1	N/A	Plasmodium falciparum 3D7	Pf3D7_01_v3:444,710..449,954(+)	eukaryotic translation initiation factor 4E, putative	protein coding gene	eukaryotic translation initiation factor 4F complex;nucleus	RNA 7-methylguanosine cap binding;translation initiation factor activity	N/A	PF01652
PF3D7_0111900	PF3D7_0111900.1	N/A	Plasmodium falciparum 3D7	Pf3D7_01_v3:449,966..450,646(-)	mitochondrial distribution and morphology protein, putative	protein coding gene	mitochondrion	N/A	N/A	PF05254
PF3D7_0112000	PF3D7_0112000.1	TatD	Plasmodium falciparum 3D7	Pf3D7_01_v3:450,831..453,195(-)	TatD-like deoxyribonuclease	protein coding gene	apicoplast;cell surface;host cell membrane;nucleus;symbiont-containing vacuole membrane	3'-5'-exodeoxyribonuclease activity;deoxyribonuclease activity	DNA metabolic process	PF01026
PF3D7_0112100	PF3D7_0112100.1	PIMMS1	Plasmodium falciparum 3D7	Pf3D7_01_v3:454,847..455,338(+)	PIMMS1 protein	protein coding gene	cell periphery;cytoplasm	N/A	N/A	N/A
PF3D7_0112200	PF3D7_0112200.1	MRP1	Plasmodium falciparum 3D7	Pf3D7_01_v3:463,764..471,891(+)	multidrug resistance-associated protein 1	protein coding gene	Maurer's cleft;integral component of plasma membrane;membrane	ATPase-coupled transmembrane transporter activity;glutathione binding	response to drug;response to xenobiotic stimulus;transmembrane transport	PF00005;PF00664
PF3D7_0112800	PF3D7_0112800.1	N/A	Plasmodium falciparum 3D7	Pf3D7_01_v3:481,231..483,218(-)	Plasmodium exported protein (hyp11), unknown function	protein coding gene	host cell plasma membrane	N/A	N/A	PF09688
PF3D7_0112900	PF3D7_0112900.1	N/A	Plasmodium falciparum 3D7	Pf3D7_01_v3:483,603..487,841(+)	Plasmodium exported protein, unknown function	protein coding gene	Maurer's cleft;host cell;host cell surface	N/A	N/A	N/A
PF3D7_0113000	PF3D7_0113000.1	GARP	Plasmodium falciparum 3D7	Pf3D7_01_v3:487,239..490,901(-)	glutamic acid-rich protein GARP	protein coding gene	host cell periphery;host cell surface	host cell surface receptor binding	modulation by symbiont of host immune response;programmed cell death	N/A
PF3D7_0113100	PF3D7_0113100.1	SURF1.1	Plasmodium falciparum 3D7	Pf3D7_01_v3:494,941..500,347(+)	surface-associated interspersed protein 1.1 (SURFIN 1.1)	protein coding gene	cell surface;host cell surface	N/A	N/A	PF12879
PF3D7_0113200	PF3D7_0113200.1	N/A	Plasmodium falciparum 3D7	Pf3D7_01_v3:500,888..503,795(-)	Plasmodium exported protein, unknown function	protein coding gene	host cell	N/A	N/A	N/A
PF3D7_0113300	PF3D7_0113300.1	N/A	Plasmodium falciparum 3D7	Pf3D7_01_v3:504,339..507,459(-)	Plasmodium exported protein (hyp1), unknown function	protein coding gene	host cell	N/A	N/A	N/A
PF3D7_0113400	PF3D7_0113400.1	N/A	Plasmodium falciparum 3D7	Pf3D7_01_v3:507,977..510,158(-)	Plasmodium exported protein, unknown function	protein coding gene	host cell	N/A	N/A	N/A
PF3D7_0113700	PF3D7_0113700.1	HSP40	Plasmodium falciparum 3D7	Pf3D7_01_v3:519,766..523,106(+)	heat shock protein 40, type II	protein coding gene	Maurer's cleft;cytosol;host cell cytosol	chaperone binding;cholesterol binding;histone binding;protein binding;unfolded protein binding	chaperone cofactor-dependent protein refolding;cytoadherence to microvasculature, mediated by symbiont protein;response to heat	PF00226;PF01556
PF3D7_0113800	PF3D7_0113800.1	N/A	Plasmodium falciparum 3D7	Pf3D7_01_v3:526,530..536,562(+)	DBL containing protein, unknown function	protein coding gene	N/A	N/A	N/A	PF05424
PF3D7_0113900	PF3D7_0113900.1	CBP1	Plasmodium falciparum 3D7	Pf3D7_01_v3:536,783..538,156(-)	CX3CL1-binding protein 1	protein coding gene	Maurer's cleft;host cell cytoplasm;host cell surface	chemokine binding;protein binding	cytoadherence to microvasculature, mediated by symbiont protein	N/A
PF3D7_0114000	PF3D7_0114000.1	EPF1	Plasmodium falciparum 3D7	Pf3D7_01_v3:541,805..547,544(+)	exported protein family 1	protein coding gene	Maurer's cleft	protein binding	N/A	PF00226;PF14308
PF3D7_0114100	PF3D7_0114100.1	MC-2TM	Plasmodium falciparum 3D7	Pf3D7_01_v3:547,245..548,669(-)	Pfmc-2TM Maurer's cleft two transmembrane protein	protein coding gene	Maurer's cleft;integral component of membrane;nucleus;symbiont-containing vacuole membrane	N/A	translocation of peptides or proteins into host	N/A
PF3D7_0114200	PF3D7_0114200.1	EPF3	Plasmodium falciparum 3D7	Pf3D7_01_v3:550,576..551,713(-)	exported protein family 3	protein coding gene	Maurer's cleft	N/A	N/A	PF09715
PF3D7_0114500	PF3D7_0114500.1	N/A	Plasmodium falciparum 3D7	Pf3D7_01_v3:557,700..558,946(-)	Plasmodium exported protein (hyp10), unknown function	protein coding gene	host cell	N/A	N/A	N/A
PF3D7_0114700	PF3D7_0114700.1	RIF	Plasmodium falciparum 3D7	Pf3D7_01_v3:563,703..564,842(-)	rifin	protein coding gene	host cell plasma membrane	N/A	antigenic variation	PF02009
PF3D7_0114750	PF3D7_0114750.1	N/A	Plasmodium falciparum 3D7	Pf3D7_01_v3:566,515..566,691(-)	Plasmodium exported protein, unknown function, fragment	protein coding gene	N/A	N/A	N/A	N/A
PF3D7_0114800	PF3D7_0114800.1	N/A	Plasmodium falciparum 3D7	Pf3D7_01_v3:569,485..570,272(-)	Plasmodium exported protein (hyp7), unknown function	protein coding gene	host cell	N/A	N/A	N/A
PF3D7_0115000	PF3D7_0115000.1	SURF1.3	Plasmodium falciparum 3D7	Pf3D7_01_v3:577,704..583,789(+)	surface-associated interspersed protein 1.3 (SURFIN 1.3)	protein coding gene	cell surface;host cell surface	N/A	N/A	PF12879
PF3D7_0115100	PF3D7_0115100.1	N/A	Plasmodium falciparum 3D7	Pf3D7_01_v3:587,391..588,394(+)	Plasmodium exported protein (PHISTa), unknown function	protein coding gene	host cell	N/A	N/A	PF09687
PF3D7_0115200	PF3D7_0115200.1	RIF	Plasmodium falciparum 3D7	Pf3D7_01_v3:591,849..593,187(+)	rifin	protein coding gene	Maurer's cleft;host cell plasma membrane;symbiont-containing vacuole	N/A	antigenic variation;cytoadherence to microvasculature, mediated by symbiont protein;modulation by symbiont of host erythrocyte aggregation	PF02009
PF3D7_0115300	PF3D7_0115300.1	RIF	Plasmodium falciparum 3D7	Pf3D7_01_v3:595,102..596,273(+)	rifin	protein coding gene	host cell plasma membrane	N/A	antigenic variation	PF02009
PF3D7_0115400	PF3D7_0115400.1	N/A	Plasmodium falciparum 3D7	Pf3D7_01_v3:598,465..599,472(+)	stevor	protein coding gene	Maurer's cleft	N/A	modulation by symbiont of host erythrocyte aggregation	PF17410
PF3D7_0115600	PF3D7_0115600.1	RIF	Plasmodium falciparum 3D7	Pf3D7_01_v3:604,162..605,531(+)	rifin	protein coding gene	Maurer's cleft;host cell plasma membrane;symbiont-containing vacuole	N/A	antigenic variation;cytoadherence to microvasculature, mediated by symbiont protein;modulation by symbiont of host erythrocyte aggregation	PF02009
PF3D7_0115700	PF3D7_0115700.1	VAR	Plasmodium falciparum 3D7	Pf3D7_01_v3:607,390..614,893(-)	erythrocyte membrane protein 1, PfEMP1	protein coding gene	host cell plasma membrane;infected host cell surface knob	cell adhesion molecule binding	antigenic variation;cell-cell adhesion;cytoadherence to microvasculature, mediated by symbiont protein;modulation by symbiont of host erythrocyte aggregation	PF03011;PF05424;PF15445;PF15447;PF18562
PF3D7_0200100	PF3D7_0200100.1	VAR	Plasmodium falciparum 3D7	Pf3D7_02_v3:25,232..31,168(+)	erythrocyte membrane protein 1, PfEMP1	protein coding gene	host cell plasma membrane;infected host cell surface knob	cell adhesion molecule binding;host cell surface receptor binding	antigenic variation;cell-cell adhesion;cytoadherence to microvasculature, mediated by symbiont protein	PF03011;PF05424;PF15445;PF15447
PF3D7_0200200	PF3D7_0200200.1	RIF	Plasmodium falciparum 3D7	Pf3D7_02_v3:33,030..34,259(-)	rifin	protein coding gene	Maurer's cleft;host cell plasma membrane;symbiont-containing vacuole	N/A	antigenic variation;cytoadherence to microvasculature, mediated by symbiont protein;modulation by symbiont of host erythrocyte aggregation	PF02009
PF3D7_0200300	PF3D7_0200300.1	N/A	Plasmodium falciparum 3D7	Pf3D7_02_v3:35,927..37,249(-)	erythrocyte membrane protein 1 (PfEMP1), exon 2	protein coding gene	N/A	N/A	N/A	PF15445
PF3D7_0200400	PF3D7_0200400.1	N/A	Plasmodium falciparum 3D7	Pf3D7_02_v3:38,287..39,303(-)	stevor	protein coding gene	Maurer's cleft	N/A	modulation by symbiont of host erythrocyte aggregation	PF17410
PF3D7_0200500	PF3D7_0200500.1	RIF	Plasmodium falciparum 3D7	Pf3D7_02_v3:41,515..42,858(-)	rifin	protein coding gene	Maurer's cleft;host cell plasma membrane;symbiont-containing vacuole	N/A	antigenic variation;cytoadherence to microvasculature, mediated by symbiont protein;modulation by symbiont of host erythrocyte aggregation	PF02009
PF3D7_0200600	PF3D7_0200600.1	RIF	Plasmodium falciparum 3D7	Pf3D7_02_v3:45,286..46,558(-)	rifin	protein coding gene	Maurer's cleft;host cell plasma membrane;symbiont-containing vacuole	N/A	antigenic variation;cytoadherence to microvasculature, mediated by symbiont protein;modulation by symbiont of host erythrocyte aggregation	PF02009
PF3D7_0200700	PF3D7_0200700.1	RIF	Plasmodium falciparum 3D7	Pf3D7_02_v3:48,923..50,147(-)	rifin	protein coding gene	Maurer's cleft;host cell plasma membrane;symbiont-containing vacuole	N/A	antigenic variation;cytoadherence to microvasculature, mediated by symbiont protein;modulation by symbiont of host erythrocyte aggregation	PF02009
PF3D7_0201000	PF3D7_0201000.1	RIF	Plasmodium falciparum 3D7	Pf3D7_02_v3:57,344..58,421(-)	rifin	protein coding gene	host cell plasma membrane	N/A	antigenic variation	PF02009
PF3D7_0201100	PF3D7_0201100.1	N/A	Plasmodium falciparum 3D7	Pf3D7_02_v3:60,107..60,319(-)	Plasmodium exported protein, unknown function, fragment	protein coding gene	N/A	N/A	N/A	N/A
PF3D7_0201200	PF3D7_0201200.1	RIF	Plasmodium falciparum 3D7	Pf3D7_02_v3:63,157..64,376(+)	rifin	protein coding gene	Maurer's cleft;host cell plasma membrane;symbiont-containing vacuole	N/A	antigenic variation;cytoadherence to microvasculature, mediated by symbiont protein;modulation by symbiont of host erythrocyte aggregation	PF02009
PF3D7_0201300	PF3D7_0201300.1	N/A	Plasmodium falciparum 3D7	Pf3D7_02_v3:66,529..67,545(+)	stevor	protein coding gene	Maurer's cleft;nucleus	N/A	modulation by symbiont of host erythrocyte aggregation	PF17410
PF3D7_0201400	PF3D7_0201400.1	N/A	Plasmodium falciparum 3D7	Pf3D7_02_v3:69,088..69,771(+)	Plasmodium exported protein (hyp10), unknown function	protein coding gene	host cell	N/A	N/A	N/A
PF3D7_0201500	PF3D7_0201500.1	N/A	Plasmodium falciparum 3D7	Pf3D7_02_v3:72,155..76,714(-)	Plasmodium exported protein (hyp9), unknown function	protein coding gene	Maurer's cleft;host cell	N/A	N/A	N/A
PF3D7_0201600	PF3D7_0201600.1	RLP1	Plasmodium falciparum 3D7	Pf3D7_02_v3:76,725..79,448(-)	PHISTb domain-containing RESA-like protein 1	protein coding gene	host cell cytosol;host cell surface	N/A	cytoadherence to microvasculature, mediated by symbiont protein	PF09687
PF3D7_0201700	PF3D7_0201700.1	N/A	Plasmodium falciparum 3D7	Pf3D7_02_v3:80,851..84,937(-)	DnaJ protein, putative	protein coding gene	Maurer's cleft	N/A	N/A	PF00226;PF09687;PF14308
PF3D7_0201800	PF3D7_0201800.1	KAHsp40	Plasmodium falciparum 3D7	Pf3D7_02_v3:86,183..89,482(-)	knob associated heat shock protein 40	protein coding gene	Maurer's cleft;cytosol;infected host cell surface knob;nucleus	chaperone binding;protein binding;unfolded protein binding	chaperone cofactor-dependent protein refolding	PF00226;PF01556
PF3D7_0201900	PF3D7_0201900.1	EMP3	Plasmodium falciparum 3D7	Pf3D7_02_v3:90,205..100,157(-)	erythrocyte membrane protein 3	protein coding gene	Maurer's cleft;cytoplasm;extracellular vesicle;keratohyalin granule;nucleus;symbiont-containing vacuole	protein binding	N/A	N/A
PF3D7_0202000	PF3D7_0202000.1	KAHRP	Plasmodium falciparum 3D7	Pf3D7_02_v3:102,137..106,662(-)	knob-associated histidine-rich protein	protein coding gene	Maurer's cleft;cytoplasm;extracellular vesicle;infected host cell surface knob;nucleus	RNA binding;actin binding;protein binding	cytoadherence to microvasculature, mediated by symbiont protein	PF17986
PF3D7_0202100	PF3D7_0202100.1	LSAP2	Plasmodium falciparum 3D7	Pf3D7_02_v3:108,217..111,658(-)	liver stage associated protein 2	protein coding gene	Maurer's cleft;host cell	N/A	N/A	PF09687
PF3D7_0202200	PF3D7_0202200.1	PTP1	Plasmodium falciparum 3D7	Pf3D7_02_v3:111,818..115,064(-)	EMP1-trafficking protein	protein coding gene	Maurer's cleft;host cell cytoplasm;integral component of membrane;protein-containing complex	protein-containing complex binding	N/A	N/A
PF3D7_0202300	PF3D7_0202300.1	N/A	Plasmodium falciparum 3D7	Pf3D7_02_v3:117,033..118,455(+)	Plasmodium exported protein (hyp11), unknown function	protein coding gene	Maurer's cleft;host cell	N/A	N/A	PF09688
PF3D7_0202400	PF3D7_0202400.1	PTEF	Plasmodium falciparum 3D7	Pf3D7_02_v3:118,835..125,090(+)	translation-enhancing factor	protein coding gene	cytoplasm;host cell;host cell cytoplasm;plasma membrane;symbiont-containing vacuole	ribosome binding	regulation of translation	PF09216
PF3D7_0202500	PF3D7_0202500.1	ETRAMP2	Plasmodium falciparum 3D7	Pf3D7_02_v3:127,203..129,089(+)	early transcribed membrane protein 2	protein coding gene	extracellular vesicle;nucleus;symbiont-containing vacuole membrane	N/A	N/A	PF09716
PF3D7_0202600	PF3D7_0202600.1	N/A	Plasmodium falciparum 3D7	Pf3D7_02_v3:129,336..134,329(-)	nucleic acid-binding protein, putative	protein coding gene	N/A	N/A	N/A	N/A
PF3D7_0202600	PF3D7_0202600.2	N/A	Plasmodium falciparum 3D7	Pf3D7_02_v3:129,336..134,329(-)	nucleic acid-binding protein, putative	protein coding gene	N/A	N/A	N/A	N/A
PF3D7_0202700	PF3D7_0202700.1	OPP	Plasmodium falciparum 3D7	Pf3D7_02_v3:134,779..137,615(+)	octaprenyl pyrophosphate synthase	protein coding gene	apicoplast;cytoplasm;mitochondrion;transferase complex	15-cis-phytoene synthase activity;prenyltransferase activity	carotenoid biosynthetic process;isoprenoid biosynthetic process;ubiquinone biosynthetic process	PF00348
PF3D7_0202800	PF3D7_0202800.1	N/A	Plasmodium falciparum 3D7	Pf3D7_02_v3:137,155..141,252(-)	conserved Plasmodium protein, unknown function	protein coding gene	N/A	N/A	N/A	N/A
PF3D7_0202900	PF3D7_0202900.1	DHHC12	Plasmodium falciparum 3D7	Pf3D7_02_v3:138,621..141,266(+)	palmitoyltransferase DHHC12, putative	protein coding gene	Golgi apparatus;endoplasmic reticulum	palmitoyltransferase activity;protein-cysteine S-palmitoyltransferase activity	peptidyl-L-cysteine S-palmitoylation;protein palmitoylation;protein targeting to membrane	PF01529
PF3D7_0203000	PF3D7_0203000.1	ROPE	Plasmodium falciparum 3D7	Pf3D7_02_v3:141,269..148,515(-)	repetitive organellar protein, putative	protein coding gene	cytoplasm;membrane;rhoptry	N/A	N/A	N/A
PF3D7_0203100	PF3D7_0203100.1	N/A	Plasmodium falciparum 3D7	Pf3D7_02_v3:148,914..157,296(-)	protein kinase, putative	protein coding gene	N/A	protein serine/threonine kinase activity	protein phosphorylation	PF00069
PF3D7_0203200	PF3D7_0203200.1	N/A	Plasmodium falciparum 3D7	Pf3D7_02_v3:157,937..159,891(-)	conserved Plasmodium protein, unknown function	protein coding gene	N/A	N/A	N/A	N/A
PF3D7_0203300	PF3D7_0203300.1	ERCC1	Plasmodium falciparum 3D7	Pf3D7_02_v3:160,393..161,450(+)	ERCC1 nucleotide excision repair protein, putative	protein coding gene	ERCC4-ERCC1 complex;mitochondrion;nucleotide-excision repair factor 1 complex	damaged DNA binding;endodeoxyribonuclease activity;single-stranded DNA binding	UV-damage excision repair;meiotic mismatch repair;mitotic recombination;nucleotide-excision repair;nucleotide-excision repair, DNA incision, 5'-to lesion	PF03834
PF3D7_0203400	PF3D7_0203400.1	N/A	Plasmodium falciparum 3D7	Pf3D7_02_v3:161,491..163,864(-)	conserved protein, unknown function	protein coding gene	nucleus	N/A	N/A	N/A
PF3D7_0203600	PF3D7_0203600.1	N/A	Plasmodium falciparum 3D7	Pf3D7_02_v3:165,912..168,559(+)	conserved Plasmodium protein, unknown function	protein coding gene	N/A	N/A	N/A	N/A
PF3D7_0203700	PF3D7_0203700.1	MAK16	Plasmodium falciparum 3D7	Pf3D7_02_v3:168,580..170,767(-)	protein MAK16, putative	protein coding gene	nucleolus;preribosome, large subunit precursor	N/A	maturation of 5.8S rRNA;maturation of LSU-rRNA;ribosomal large subunit biogenesis	PF01778
PF3D7_0203800	PF3D7_0203800.1	N/A	Plasmodium falciparum 3D7	Pf3D7_02_v3:171,277..175,196(-)	conserved Plasmodium protein, unknown function	protein coding gene	mitochondrion	N/A	N/A	N/A
PF3D7_0203900	PF3D7_0203900.1	N/A	Plasmodium falciparum 3D7	Pf3D7_02_v3:176,370..178,737(+)	5'-3' exonuclease, putative	protein coding gene	apicoplast	5'-3' exonuclease activity;DNA binding	N/A	PF01367;PF02739
PF3D7_0204000	PF3D7_0204000.1	CAPH2	Plasmodium falciparum 3D7	Pf3D7_02_v3:178,955..181,941(+)	condensin-2 complex subunit H2, putative	protein coding gene	condensed chromosome;condensin complex;nucleus	chromatin binding	chromosome organization;meiotic chromosome condensation;mitotic sister chromatid separation	PF06278
PF3D7_0204100	PF3D7_0204100.1	N/A	Plasmodium falciparum 3D7	Pf3D7_02_v3:181,749..189,877(-)	Sel1 repeat-containing protein, putative	protein coding gene	cytosol	N/A	N/A	PF08238
PF3D7_0204200	PF3D7_0204200.1	SEC66	Plasmodium falciparum 3D7	Pf3D7_02_v3:192,755..194,248(+)	translocation protein SEC66, putative	protein coding gene	nucleus	N/A	N/A	PF09802
PF3D7_0204300	PF3D7_0204300.1	N/A	Plasmodium falciparum 3D7	Pf3D7_02_v3:194,272..197,151(-)	conserved Plasmodium protein, unknown function	protein coding gene	N/A	N/A	N/A	N/A
PF3D7_0204400	PF3D7_0204400.1	N/A	Plasmodium falciparum 3D7	Pf3D7_02_v3:197,153..198,043(-)	dynein light chain, putative	protein coding gene	dynein complex	dynein intermediate chain binding;dynein light intermediate chain binding	obsolete positive regulation of microtubule motor activity, plus-end-directed	PF01221
PF3D7_0204500	PF3D7_0204500.1	AspAT	Plasmodium falciparum 3D7	Pf3D7_02_v3:198,353..199,613(-)	aspartate transaminase	protein coding gene	mitochondrion	L-aspartate:2-oxoglutarate aminotransferase activity;transaminase activity	cellular amino acid metabolic process	PF00155
PF3D7_0204600	PF3D7_0204600.1	N/A	Plasmodium falciparum 3D7	Pf3D7_02_v3:199,889..204,454(-)	5'-3' exonuclease, putative	protein coding gene	apicoplast;nucleus	5'-3' exoribonuclease activity;RNA binding	nuclear-transcribed mRNA catabolic process	PF03159
PF3D7_0204700	PF3D7_0204700.1	HT1	Plasmodium falciparum 3D7	Pf3D7_02_v3:204,784..207,425(-)	hexose transporter	protein coding gene	cell surface;food vacuole;integral component of membrane;integral component of plasma membrane;nucleus	D-glucose transmembrane transporter activity;fructose transmembrane transporter activity;glucose transmembrane transporter activity;hexose transmembrane transporter activity	fructose transmembrane transport;glucose transmembrane transport;hexose transmembrane transport;response to xenobiotic stimulus	PF00083
PF3D7_0204800	PF3D7_0204800.1	N/A	Plasmodium falciparum 3D7	Pf3D7_02_v3:209,149..211,029(-)	3'-5' exonuclease, putative	protein coding gene	mitochondrion	3'-5' exonuclease activity	N/A	PF01612
PF3D7_0204900	PF3D7_0204900.1	COQ5	Plasmodium falciparum 3D7	Pf3D7_02_v3:211,067..212,635(+)	2-methoxy-6-polyprenyl-1,4-benzoquinol methylase, mitochondrial, putative	protein coding gene	mitochondrial matrix;mitochondrion;osmiophilic body	2-hexaprenyl-6-methoxy-1,4-benzoquinone methyltransferase activity;methyltransferase activity;quinone cofactor methyltransferase activity	quinone biosynthetic process;ubiquinone biosynthetic process	PF01209
PF3D7_0205000	PF3D7_0205000.1	N/A	Plasmodium falciparum 3D7	Pf3D7_02_v3:212,672..214,714(-)	conserved Plasmodium protein, unknown function	protein coding gene	N/A	N/A	N/A	N/A
PF3D7_0205100	PF3D7_0205100.1	N/A	Plasmodium falciparum 3D7	Pf3D7_02_v3:214,838..217,843(-)	conserved Plasmodium protein, unknown function	protein coding gene	N/A	N/A	N/A	N/A
PF3D7_0205200	PF3D7_0205200.1	N/A	Plasmodium falciparum 3D7	Pf3D7_02_v3:217,882..218,907(-)	MORN repeat protein, putative	protein coding gene	cytosol	N/A	N/A	PF02493
PF3D7_0205300	PF3D7_0205300.1	N/A	Plasmodium falciparum 3D7	Pf3D7_02_v3:219,690..222,256(+)	conserved Plasmodium protein, unknown function	protein coding gene	N/A	N/A	N/A	N/A
PF3D7_0205400	PF3D7_0205400.1	N/A	Plasmodium falciparum 3D7	Pf3D7_02_v3:222,830..225,455(+)	PCI domain-containing protein, putative	protein coding gene	transcription export complex 2	RNA binding;double-stranded DNA binding	nuclear retention of pre-mRNA at the site of transcription;poly(A)+ mRNA export from nucleus;posttranscriptional tethering of RNA polymerase II gene DNA at nuclear periphery;transcription elongation from RNA polymerase II promoter	N/A
PF3D7_0205500	PF3D7_0205500.1	N/A	Plasmodium falciparum 3D7	Pf3D7_02_v3:225,212..226,438(-)	DNA-directed RNA polymerase II 16 kDa subunit, putative	protein coding gene	P-body;RNA polymerase II, core complex;nucleus	DNA-directed 5'-3' RNA polymerase activity;translation initiation factor binding	mRNA export from nucleus in response to heat stress;nuclear-transcribed mRNA catabolic process, deadenylation-dependent decay;positive regulation of translational initiation;recruitment of 3'-end processing factors to RNA polymerase II holoenzyme complex;transcription by RNA polymerase II;transcript	PF03874
PF3D7_0205600	PF3D7_0205600.1	N/A	Plasmodium falciparum 3D7	Pf3D7_02_v3:227,756..230,583(+)	conserved Plasmodium protein, unknown function	protein coding gene	nucleus	N/A	N/A	N/A
PF3D7_0205700	PF3D7_0205700.1	N/A	Plasmodium falciparum 3D7	Pf3D7_02_v3:230,768..232,631(+)	RNA-binding protein, putative	protein coding gene	N/A	N/A	N/A	PF00076
PF3D7_0205700	PF3D7_0205700.2	N/A	Plasmodium falciparum 3D7	Pf3D7_02_v3:230,768..232,631(+)	RNA-binding protein, putative	protein coding gene	N/A	N/A	N/A	PF00076
PF3D7_0205800	PF3D7_0205800.1	PH1	Plasmodium falciparum 3D7	Pf3D7_02_v3:232,642..233,918(-)	PH domain-containing protein, putative	protein coding gene	cytoplasm	lipid binding	N/A	PF00169
PF3D7_0205900	PF3D7_0205900.1	RPN1	Plasmodium falciparum 3D7	Pf3D7_02_v3:234,461..239,124(+)	26S proteasome regulatory subunit RPN1, putative	protein coding gene	nucleus;proteasome regulatory particle;proteasome regulatory particle, base subcomplex;proteasome storage granule	N/A	proteasome-mediated ubiquitin-dependent protein catabolic process;ubiquitin-dependent protein catabolic process	PF01851;PF17781;PF18051
PF3D7_0206000	PF3D7_0206000.1	RAD2	Plasmodium falciparum 3D7	Pf3D7_02_v3:239,146..244,604(-)	DNA repair protein RAD2, putative	protein coding gene	chromosome, telomeric region;nucleotide-excision repair factor 3 complex	5'-flap endonuclease activity;damaged DNA binding;endonuclease activity;flap endonuclease activity;single-stranded DNA endodeoxyribonuclease activity	DNA repair;nucleotide-excision repair, DNA incision, 3'-to lesion	PF00752;PF00867
PF3D7_0206100	PF3D7_0206100.1	SufE	Plasmodium falciparum 3D7	Pf3D7_02_v3:244,645..248,513(+)	cysteine desulfuration protein SufE	protein coding gene	apicoplast	cysteine desulfurase activity;enzyme activator activity;protein binding	N/A	PF02657
PF3D7_0206200	PF3D7_0206200.1	PAT	Plasmodium falciparum 3D7	Pf3D7_02_v3:248,880..251,521(+)	pantothenate transporter	protein coding gene	cytoplasmic vesicle;integral component of membrane;microneme;osmiophilic body;plasma membrane	pantothenate transmembrane transporter activity	cell gliding;exit from host cell;pantothenate transmembrane transport	PF07690
PF3D7_0206500	PF3D7_0206500.1	N/A	Plasmodium falciparum 3D7	Pf3D7_02_v3:262,727..268,003(-)	conserved Plasmodium protein, unknown function	protein coding gene	nucleus	N/A	N/A	N/A
PF3D7_0206600	PF3D7_0206600.1	N/A	Plasmodium falciparum 3D7	Pf3D7_02_v3:268,187..270,646(-)	DNA-directed RNA polymerase III subunit RPC10, putative	protein coding gene	RNA polymerase III complex	DNA-binding transcription factor activity;RNA polymerase III activity	termination of RNA polymerase III transcription;transcription by RNA polymerase III	PF01096
PF3D7_0206700	PF3D7_0206700.1	ADSL	Plasmodium falciparum 3D7	Pf3D7_02_v3:271,374..274,711(+)	adenylosuccinate lyase	protein coding gene	Maurer's cleft;nucleus	N6-(1,2-dicarboxyethyl)AMP AMP-lyase (fumarate-forming) activity	purine nucleotide metabolic process	PF00206;PF08328
PF3D7_0206800	PF3D7_0206800.1	MSP2	Plasmodium falciparum 3D7	Pf3D7_02_v3:271,576..274,917(-)	merozoite surface protein 2	protein coding gene	anchored component of plasma membrane;integral component of membrane;integral component of plasma membrane;nucleus	N/A	N/A	PF00985
PF3D7_0206900	PF3D7_0206900.1	MSP5	Plasmodium falciparum 3D7	Pf3D7_02_v3:274,946..276,712(-)	merozoite surface protein 5	protein coding gene	anchored component of plasma membrane;integral component of membrane	N/A	N/A	N/A
PF3D7_0206900	PF3D7_0206900.2	MSP5	Plasmodium falciparum 3D7	Pf3D7_02_v3:274,946..276,712(-)	merozoite surface protein 5	protein coding gene	N/A	N/A	N/A	N/A
PF3D7_0207000	PF3D7_0207000.1	MSP4	Plasmodium falciparum 3D7	Pf3D7_02_v3:276,725..279,258(-)	merozoite surface protein 4	protein coding gene	Maurer's cleft;anchored component of plasma membrane;integral component of membrane	N/A	N/A	PF12947
PF3D7_0207100	PF3D7_0207100.1	N/A	Plasmodium falciparum 3D7	Pf3D7_02_v3:281,275..287,696(+)	conserved Plasmodium protein, unknown function	protein coding gene	cytoplasm;membrane	N/A	N/A	N/A
PF3D7_0207200	PF3D7_0207200.1	ISCA1	Plasmodium falciparum 3D7	Pf3D7_02_v3:287,423..288,941(-)	iron-sulfur assembly protein, putative	protein coding gene	mitochondrion	2 iron, 2 sulfur cluster binding;4 iron, 4 sulfur cluster binding;iron ion binding	iron-sulfur cluster assembly;protein maturation;protein maturation by [4Fe-4S] cluster transfer	PF01521
PF3D7_0207300	PF3D7_0207300.1	SERA8	Plasmodium falciparum 3D7	Pf3D7_02_v3:290,168..292,703(-)	serine repeat antigen 8	protein coding gene	extracellular space;lysosome	cysteine-type endopeptidase activity	proteolysis involved in cellular protein catabolic process	PF00112
PF3D7_0207400	PF3D7_0207400.1	SERA7	Plasmodium falciparum 3D7	Pf3D7_02_v3:293,896..297,980(-)	serine repeat antigen 7	protein coding gene	extracellular space;lysosome	cysteine-type endopeptidase activity;cysteine-type peptidase activity	immunoglobulin production;proteolysis;proteolysis involved in cellular protein catabolic process;regulation of immune response	PF00112
PF3D7_0207500	PF3D7_0207500.1	SERA6	Plasmodium falciparum 3D7	Pf3D7_02_v3:298,380..302,820(-)	serine repeat antigen 6	protein coding gene	extracellular space;lysosome;nucleus;symbiont-containing vacuole	cysteine-type endopeptidase activity;cysteine-type peptidase activity;protein binding	exit from host cell;immunoglobulin production;proteolysis;proteolysis involved in cellular protein catabolic process;regulation of immune response	PF00112
PF3D7_0207600	PF3D7_0207600.1	SERA5	Plasmodium falciparum 3D7	Pf3D7_02_v3:303,409..307,376(-)	serine repeat antigen 5	protein coding gene	extracellular space;extracellular vesicle;lysosome;nucleus;symbiont-containing vacuolar space;symbiont-containing vacuole	cysteine-type endopeptidase activity;cysteine-type peptidase activity;kinase binding;peptidase activity;protein binding	exit from host cell;immunoglobulin production;proteolysis;proteolysis involved in cellular protein catabolic process;regulation of immune response	PF00112
PF3D7_0207700	PF3D7_0207700.1	SERA4	Plasmodium falciparum 3D7	Pf3D7_02_v3:308,628..312,348(-)	serine repeat antigen 4	protein coding gene	extracellular space;lysosome;symbiont-containing vacuole	cysteine-type endopeptidase activity;cysteine-type peptidase activity	immunoglobulin production;proteolysis;proteolysis involved in cellular protein catabolic process;regulation of immune response	PF00112
PF3D7_0207800	PF3D7_0207800.1	SERA3	Plasmodium falciparum 3D7	Pf3D7_02_v3:312,990..316,944(-)	serine repeat antigen 3	protein coding gene	extracellular space;lysosome	cysteine-type endopeptidase activity;cysteine-type peptidase activity	immunoglobulin production;proteolysis;proteolysis involved in cellular protein catabolic process;regulation of immune response	PF00112
PF3D7_0207900	PF3D7_0207900.1	SERA2	Plasmodium falciparum 3D7	Pf3D7_02_v3:317,422..321,552(-)	serine repeat antigen 2	protein coding gene	extracellular space;lysosome	cysteine-type endopeptidase activity;cysteine-type peptidase activity	immunoglobulin production;proteolysis;proteolysis involved in cellular protein catabolic process;regulation of immune response	PF00112
PF3D7_0208000	PF3D7_0208000.1	SERA1	Plasmodium falciparum 3D7	Pf3D7_02_v3:322,329..326,390(-)	serine repeat antigen 1	protein coding gene	extracellular space;lysosome	cysteine-type endopeptidase activity;cysteine-type peptidase activity	immunoglobulin production;proteolysis;proteolysis involved in cellular protein catabolic process;regulation of immune response	PF00112
PF3D7_0208100	PF3D7_0208100.1	N/A	Plasmodium falciparum 3D7	Pf3D7_02_v3:327,442..335,433(+)	conserved Plasmodium protein, unknown function	protein coding gene	nucleus;plasma membrane	calcium ion binding;calcium-dependent phospholipid binding	intracellular protein transmembrane transport;positive regulation of glucose transmembrane transport;positive regulation of protein targeting to membrane;positive regulation of vesicle fusion;protein localization to plasma membrane	N/A
PF3D7_0208200	PF3D7_0208200.1	KRR1	Plasmodium falciparum 3D7	Pf3D7_02_v3:335,421..337,000(-)	KRR1 small subunit processome component, putative	protein coding gene	nucleolus;nucleus;preribosome, small subunit precursor;small-subunit processome	N/A	rRNA processing;ribosomal small subunit biogenesis	PF17903
PF3D7_0208300	PF3D7_0208300.1	N/A	Plasmodium falciparum 3D7	Pf3D7_02_v3:337,310..343,223(+)	conserved Plasmodium protein, unknown function	protein coding gene	N/A	N/A	N/A	N/A
PF3D7_0208400	PF3D7_0208400.1	N/A	Plasmodium falciparum 3D7	Pf3D7_02_v3:342,081..351,139(-)	conserved Plasmodium protein, unknown function	protein coding gene	N/A	phosphatase activity	dephosphorylation	N/A
PF3D7_0208500	PF3D7_0208500.1	ACP	Plasmodium falciparum 3D7	Pf3D7_02_v3:351,650..354,043(+)	acyl carrier protein	protein coding gene	apicoplast	acyl binding;acyl carrier activity;holo-[acyl-carrier-protein] synthase activity	N/A	PF00550
PF3D7_0208600	PF3D7_0208600.1	RRF1	Plasmodium falciparum 3D7	Pf3D7_02_v3:354,341..356,448(+)	ribosome-recycling factor	protein coding gene	apicoplast;mitochondrion	ribosomal large subunit binding	ribosome disassembly;translation	PF01765
PF3D7_0208700	PF3D7_0208700.1	N/A	Plasmodium falciparum 3D7	Pf3D7_02_v3:356,196..358,035(-)	SHS2 domain-containing protein, putative	protein coding gene	N/A	N/A	N/A	N/A
PF3D7_0208800	PF3D7_0208800.1	N/A	Plasmodium falciparum 3D7	Pf3D7_02_v3:358,084..360,086(+)	protein P22, putative	protein coding gene	cytosol;plasma membrane	N/A	N/A	N/A
PF3D7_0208900	PF3D7_0208900.1	P230p	Plasmodium falciparum 3D7	Pf3D7_02_v3:360,828..368,354(+)	6-cysteine protein P230p	protein coding gene	anchored component of plasma membrane;cell surface;cytoplasm	N/A	entry into host	PF07422
PF3D7_0209000	PF3D7_0209000.1	P230	Plasmodium falciparum 3D7	Pf3D7_02_v3:369,351..380,156(+)	6-cysteine protein P230	protein coding gene	anchored component of plasma membrane;cell surface;plasma membrane	protein binding	entry into host;obsolete pathogenesis	PF07422
PF3D7_0209100	PF3D7_0209100.1	PATPL1	Plasmodium falciparum 3D7	Pf3D7_02_v3:380,935..384,245(-)	patatin-like phospholipase 1	protein coding gene	cytosol	phospholipase A2 activity;phospholipase activity	phospholipid metabolic process	PF01734
PF3D7_0209200	PF3D7_0209200.1	MTR3	Plasmodium falciparum 3D7	Pf3D7_02_v3:384,529..386,885(-)	exosome complex component MTR3, putative	protein coding gene	cytoplasmic exosome (RNase complex);exosome (RNase complex);nuclear exosome (RNase complex);nucleolus;osmiophilic body	N/A	U4 snRNA 3'-end processing;nuclear mRNA surveillance;nuclear-transcribed mRNA catabolic process, exonucleolytic, 3'-5';polyadenylation-dependent snoRNA 3'-end processing;rRNA catabolic process	PF01138
PF3D7_0209300	PF3D7_0209300.1	IspF	Plasmodium falciparum 3D7	Pf3D7_02_v3:386,930..388,236(+)	2C-methyl-D-erythritol 2,4-cyclodiphosphate synthase	protein coding gene	apicoplast	2-C-methyl-D-erythritol 2,4-cyclodiphosphate synthase activity	N/A	PF02542
PF3D7_0209400	PF3D7_0209400.1	N/A	Plasmodium falciparum 3D7	Pf3D7_02_v3:388,216..391,107(-)	ARMT1-like domain-containing protein, putative	protein coding gene	N/A	phosphatase activity	regulation of response to DNA damage stimulus	PF01937
PF3D7_0209500	PF3D7_0209500.1	N/A	Plasmodium falciparum 3D7	Pf3D7_02_v3:391,238..392,887(-)	conserved Plasmodium protein, unknown function	protein coding gene	N/A	N/A	N/A	N/A
PF3D7_0209600	PF3D7_0209600.1	N/A	Plasmodium falciparum 3D7	Pf3D7_02_v3:393,969..399,286(-)	transporter, putative	protein coding gene	integral component of membrane;plasma membrane	N/A	sodium ion transmembrane transport	PF00209
PF3D7_0209700	PF3D7_0209700.1	N/A	Plasmodium falciparum 3D7	Pf3D7_02_v3:400,078..402,755(-)	RING zinc finger protein, putative	protein coding gene	cytosol;nucleus	ubiquitin-protein transferase activity	mitotic cell cycle checkpoint signaling;protein ubiquitination;ubiquitin-dependent protein catabolic process	PF13923
PF3D7_0209800	PF3D7_0209800.1	UAP56	Plasmodium falciparum 3D7	Pf3D7_02_v3:403,095..406,706(-)	ATP-dependent RNA helicase UAP56	protein coding gene	RNA N6-methyladenosine methyltransferase complex;cytoplasm;nucleus	RNA binding;RNA helicase activity	N/A	PF00270;PF00271
PF3D7_0210000	PF3D7_0210000.1	Sec61-gamma	Plasmodium falciparum 3D7	Pf3D7_02_v3:409,983..411,199(+)	secretory complex protein 61 gamma subunit	protein coding gene	Sec61 translocon complex;Ssh1 translocon complex;endoplasmic reticulum membrane	protein transmembrane transporter activity	posttranslational protein targeting to membrane, translocation;protein transport by the Sec complex	PF00584
PF3D7_0210100	PF3D7_0210100.1	RPL37A	Plasmodium falciparum 3D7	Pf3D7_02_v3:411,419..412,963(+)	60S ribosomal protein L37ae, putative	protein coding gene	nucleus	N/A	translation	PF01780
PF3D7_0210100	PF3D7_0210100.2	RPL37A	Plasmodium falciparum 3D7	Pf3D7_02_v3:411,419..412,963(+)	60S ribosomal protein L37ae, putative	protein coding gene	N/A	N/A	N/A	PF01780
PF3D7_0210200	PF3D7_0210200.1	N/A	Plasmodium falciparum 3D7	Pf3D7_02_v3:412,948..421,861(-)	conserved Plasmodium protein, unknown function	protein coding gene	nucleolus;nucleus	N/A	N/A	N/A
PF3D7_0210300	PF3D7_0210300.1	N/A	Plasmodium falciparum 3D7	Pf3D7_02_v3:422,574..425,116(-)	monocarboxylate transporter, putative	protein coding gene	integral component of membrane	monocarboxylic acid transmembrane transporter activity	monocarboxylic acid transport	PF07690
PF3D7_0210400	PF3D7_0210400.1	N/A	Plasmodium falciparum 3D7	Pf3D7_02_v3:425,599..427,108(+)	50S ribosomal protein L33, putative	protein coding gene	mitochondrion	N/A	N/A	PF00471
PF3D7_0210500	PF3D7_0210500.1	N/A	Plasmodium falciparum 3D7	Pf3D7_02_v3:427,161..431,611(+)	conserved Plasmodium protein, unknown function	protein coding gene	N/A	N/A	N/A	N/A
PF3D7_0210600	PF3D7_0210600.1	CERLI1	Plasmodium falciparum 3D7	Pf3D7_02_v3:431,716..434,231(-)	protein CERLI1	protein coding gene	apical part of cell;rhoptry;rhoptry membrane	lipid binding	entry into host	N/A
PF3D7_0210700	PF3D7_0210700.1	SYN17	Plasmodium falciparum 3D7	Pf3D7_02_v3:435,985..437,173(+)	syntaxin, Qa-SNARE family	protein coding gene	SNARE complex;endomembrane system;integral component of membrane;plasma membrane	SNAP receptor activity;SNARE binding	exocytosis;intracellular protein transport;vesicle docking;vesicle fusion;vesicle-mediated transport	PF00804;PF05739
PF3D7_0210800	PF3D7_0210800.1	N/A	Plasmodium falciparum 3D7	Pf3D7_02_v3:437,342..439,708(-)	conserved Plasmodium protein, unknown function	protein coding gene	apicoplast	N/A	N/A	N/A
PF3D7_0210900	PF3D7_0210900.1	N/A	Plasmodium falciparum 3D7	Pf3D7_02_v3:441,381..443,570(-)	conserved Plasmodium protein, unknown function	protein coding gene	RNA N6-methyladenosine methyltransferase complex;nucleus	N/A	translation	N/A
PF3D7_0211100	PF3D7_0211100.1	N/A	Plasmodium falciparum 3D7	Pf3D7_02_v3:451,526..455,367(+)	conserved Plasmodium protein, unknown function	protein coding gene	N/A	N/A	N/A	N/A
PF3D7_0211200	PF3D7_0211200.1	RAB5a	Plasmodium falciparum 3D7	Pf3D7_02_v3:455,265..456,900(-)	ras-related protein Rab-5A	protein coding gene	endocytic vesicle;endomembrane system;endosome	GTPase activity;protein binding	intracellular protein transport;regulation of vacuole fusion, non-autophagic;small GTPase mediated signal transduction	PF00071;PF08477
PF3D7_0211300	PF3D7_0211300.1	N/A	Plasmodium falciparum 3D7	Pf3D7_02_v3:456,907..458,616(-)	ubiquinol-cytochrome-c reductase complex assembly factor 1, putative	protein coding gene	mitochondrion	N/A	mitochondrial respiratory chain complex III assembly;positive regulation of mitochondrial translation	PF03981
PF3D7_0211400	PF3D7_0211400.1	KASIII	Plasmodium falciparum 3D7	Pf3D7_02_v3:458,932..461,640(-)	beta-ketoacyl-ACP synthase III	protein coding gene	apicoplast	beta-ketoacyl-acyl-carrier-protein synthase III activity;fatty acid binding	fatty acid biosynthetic process;fatty acid metabolic process	PF08541;PF08545
PF3D7_0211500	PF3D7_0211500.1	N/A	Plasmodium falciparum 3D7	Pf3D7_02_v3:463,147..467,352(+)	GAF domain-related protein, putative	protein coding gene	N/A	N/A	N/A	PF01590;PF10507
PF3D7_0211600	PF3D7_0211600.1	ALG14	Plasmodium falciparum 3D7	Pf3D7_02_v3:467,682..468,518(+)	UDP-N-acetylglucosamine transferase subunit ALG14, putative	protein coding gene	UDP-N-acetylglucosamine transferase complex	N-acetylglucosaminyldiphosphodolichol N-acetylglucosaminyltransferase activity	dolichol-linked oligosaccharide biosynthetic process	PF08660
PF3D7_0211700	PF3D7_0211700.1	TKL1	Plasmodium falciparum 3D7	Pf3D7_02_v3:469,408..474,167(+)	tyrosine kinase-like protein, putative	protein coding gene	cytoplasm;extracellular vesicle;mitochondrion	protein kinase activity	protein phosphorylation;signal transduction	PF00069
PF3D7_0211800	PF3D7_0211800.1	AsnRS	Plasmodium falciparum 3D7	Pf3D7_02_v3:475,109..477,618(+)	asparagine--tRNA ligase	protein coding gene	nucleus	asparagine-tRNA ligase activity	asparaginyl-tRNA aminoacylation	PF00152;PF01336
PF3D7_0211900	PF3D7_0211900.1	N/A	Plasmodium falciparum 3D7	Pf3D7_02_v3:477,189..479,816(-)	pseudouridine synthase, putative	protein coding gene	N/A	N/A	N/A	N/A
PF3D7_0212000	PF3D7_0212000.1	N/A	Plasmodium falciparum 3D7	Pf3D7_02_v3:479,683..481,854(+)	GDP-fructose:GMP antiporter, putative	protein coding gene	Golgi apparatus	antiporter activity;transmembrane transporter activity	N/A	N/A
PF3D7_0212100	PF3D7_0212100.1	N/A	Plasmodium falciparum 3D7	Pf3D7_02_v3:483,322..489,702(+)	conserved Plasmodium protein, unknown function	protein coding gene	nuclear periphery;nucleus	N/A	N/A	N/A
PF3D7_0212200	PF3D7_0212200.1	N/A	Plasmodium falciparum 3D7	Pf3D7_02_v3:489,203..491,256(-)	ribosomal protein L12, mitochondrial, putative	protein coding gene	cytosolic large ribosomal subunit;mitochondrion;nucleus	structural constituent of ribosome	translation	PF00542
PF3D7_0212300	PF3D7_0212300.1	ERF1	Plasmodium falciparum 3D7	Pf3D7_02_v3:491,640..495,105(+)	eukaryotic peptide chain release factor subunit 1, putative	protein coding gene	cytosol;nucleus;translation release factor complex	sequence-specific mRNA binding;translation release factor activity;translation release factor activity, codon specific	cytoplasmic translational termination;regulation of translational termination	PF03463;PF03464;PF03465
PF3D7_0212400	PF3D7_0212400.1	N/A	Plasmodium falciparum 3D7	Pf3D7_02_v3:494,337..507,898(-)	conserved Plasmodium membrane protein, unknown function	protein coding gene	N/A	N/A	N/A	N/A
PF3D7_0212500	PF3D7_0212500.1	N/A	Plasmodium falciparum 3D7	Pf3D7_02_v3:508,665..521,769(+)	conserved Plasmodium protein, unknown function	protein coding gene	N/A	N/A	N/A	N/A
PF3D7_0212600	PF3D7_0212600.1	SPATR	Plasmodium falciparum 3D7	Pf3D7_02_v3:522,339..524,405(+)	secreted protein with altered thrombospondin repeat domain	protein coding gene	apical part of cell;cell surface;microneme;rhoptry	N/A	cell-cell adhesion	N/A
PF3D7_0212700	PF3D7_0212700.1	N/A	Plasmodium falciparum 3D7	Pf3D7_02_v3:524,470..526,067(-)	SRR1-like protein	protein coding gene	cytoplasm;nucleus	N/A	circadian rhythm;microtubule-based process	PF07985
PF3D7_0212800	PF3D7_0212800.1	MATE	Plasmodium falciparum 3D7	Pf3D7_02_v3:526,387..531,923(+)	multidrug efflux pump, putative	protein coding gene	integral component of membrane;membrane	transmembrane transporter activity	response to xenobiotic stimulus	PF01554
PF3D7_0212900	PF3D7_0212900.1	ATEL1	Plasmodium falciparum 3D7	Pf3D7_02_v3:532,001..534,657(+)	arginyl-tRNA--protein transferase	protein coding gene	cytoplasm	arginyltransferase activity;catalytic activity;leucyltransferase activity	protein arginylation	PF03588
PF3D7_0213000	PF3D7_0213000.1	N/A	Plasmodium falciparum 3D7	Pf3D7_02_v3:534,659..536,945(+)	conserved protein, unknown function	protein coding gene	mitochondrion	N/A	N/A	N/A
PF3D7_0213100	PF3D7_0213100.1	SIS1	Plasmodium falciparum 3D7	Pf3D7_02_v3:537,390..540,199(+)	protein SIS1	protein coding gene	Maurer's cleft;cytosol;nucleus	chaperone binding;unfolded protein binding	chaperone cofactor-dependent protein refolding;protein folding;response to heat;response to unfolded protein	PF00226;PF01556
PF3D7_0213200	PF3D7_0213200.1	N/A	Plasmodium falciparum 3D7	Pf3D7_02_v3:539,809..541,065(-)	mitochondrial respiratory chain complex II subunit, putative	protein coding gene	mitochondrion;respiratory chain complex II	N/A	N/A	N/A
PF3D7_0213300	PF3D7_0213300.1	N/A	Plasmodium falciparum 3D7	Pf3D7_02_v3:541,071..542,094(-)	conserved protein, unknown function	protein coding gene	mitochondrion	N/A	N/A	N/A
PF3D7_0213400	PF3D7_0213400.1	PK7	Plasmodium falciparum 3D7	Pf3D7_02_v3:540,403..543,807(+)	protein kinase 7	protein coding gene	cytoplasm	MAP kinase kinase activity;protein kinase activity	protein phosphorylation;schizogony	PF00069
PF3D7_0213500	PF3D7_0213500.1	N/A	Plasmodium falciparum 3D7	Pf3D7_02_v3:543,700..546,217(-)	tetratricopeptide repeat protein, putative	protein coding gene	N/A	Hsp90 protein binding	N/A	PF13181
PF3D7_0213600	PF3D7_0213600.1	N/A	Plasmodium falciparum 3D7	Pf3D7_02_v3:546,482..555,294(-)	conserved Plasmodium protein, unknown function	protein coding gene	nucleus	N/A	N/A	N/A
PF3D7_0213700	PF3D7_0213700.1	N/A	Plasmodium falciparum 3D7	Pf3D7_02_v3:556,774..558,250(+)	conserved protein, unknown function	protein coding gene	cytoplasm;mitochondrion	N/A	N/A	PF05811
PF3D7_0213800	PF3D7_0213800.1	N/A	Plasmodium falciparum 3D7	Pf3D7_02_v3:558,585..560,594(+)	conserved protein, unknown function	protein coding gene	apical complex;apical part of cell	N/A	N/A	N/A
PF3D7_0213900	PF3D7_0213900.1	N/A	Plasmodium falciparum 3D7	Pf3D7_02_v3:560,872..565,395(-)	RTR1 domain-containing protein, putative	protein coding gene	cytosol	N/A	N/A	PF04181
PF3D7_0214000	PF3D7_0214000.1	CCT8	Plasmodium falciparum 3D7	Pf3D7_02_v3:565,669..568,518(+)	T-complex protein 1 subunit theta	protein coding gene	Maurer's cleft;apical part of cell;chaperonin-containing T-complex;cytosol;host cell cytoplasm;nucleus	protein binding;unfolded protein binding	protein folding	PF00118
PF3D7_0214100	PF3D7_0214100.1	SEC31	Plasmodium falciparum 3D7	Pf3D7_02_v3:568,246..573,893(-)	protein transport protein SEC31	protein coding gene	COPII vesicle coat;COPII-coated ER to Golgi transport vesicle;Maurer's cleft;endoplasmic reticulum exit site;host cell cytoplasm	structural molecule activity	COPII-coated vesicle budding;COPII-coated vesicle cargo loading;endoplasmic reticulum organization;endoplasmic reticulum to Golgi vesicle-mediated transport;intracellular protein transport;translocation of peptides or proteins into host cell cytoplasm	PF12931
PF3D7_0214200	PF3D7_0214200.1	mRPL13	Plasmodium falciparum 3D7	Pf3D7_02_v3:574,898..576,521(-)	ribosomal protein L13, mitochondrial	protein coding gene	cytosolic large ribosomal subunit;mitochondrial large ribosomal subunit;mitochondrion;ribosome	mRNA binding;structural constituent of ribosome	negative regulation of translation	PF00572
PF3D7_0214300	PF3D7_0214300.1	N/A	Plasmodium falciparum 3D7	Pf3D7_02_v3:577,433..586,702(+)	conserved Plasmodium protein, unknown function	protein coding gene	N/A	N/A	N/A	N/A
PF3D7_0214400	PF3D7_0214400.1	N/A	Plasmodium falciparum 3D7	Pf3D7_02_v3:586,717..589,640(-)	protein LTV1, putative	protein coding gene	cytosol;nucleus;preribosome, small subunit precursor	N/A	ribosomal small subunit biogenesis;ribosomal small subunit export from nucleus	N/A
PF3D7_0214500	PF3D7_0214500.1	N/A	Plasmodium falciparum 3D7	Pf3D7_02_v3:590,110..591,752(+)	conserved Plasmodium protein, unknown function	protein coding gene	N/A	N/A	N/A	N/A
PF3D7_0214600	PF3D7_0214600.1	STK2	Plasmodium falciparum 3D7	Pf3D7_02_v3:593,374..600,035(+)	serine/threonine protein kinase STK2, putative	protein coding gene	N/A	protein kinase activity	protein phosphorylation	PF00069
PF3D7_0214700	PF3D7_0214700.1	N/A	Plasmodium falciparum 3D7	Pf3D7_02_v3:599,425..601,740(-)	conserved Plasmodium protein, unknown function	protein coding gene	N/A	N/A	N/A	N/A
PF3D7_0214800	PF3D7_0214800.1	N/A	Plasmodium falciparum 3D7	Pf3D7_02_v3:603,261..609,873(+)	conserved Plasmodium membrane protein, unknown function	protein coding gene	integral component of membrane	N/A	N/A	N/A
PF3D7_0214900	PF3D7_0214900.1	RON6	Plasmodium falciparum 3D7	Pf3D7_02_v3:609,924..616,306(+)	rhoptry neck protein 6	protein coding gene	rhoptry neck;symbiont-containing vacuole	N/A	entry into host	N/A
PF3D7_0215000	PF3D7_0215000.1	ACS9	Plasmodium falciparum 3D7	Pf3D7_02_v3:615,813..621,692(-)	acyl-CoA synthetase	protein coding gene	endoplasmic reticulum;membrane	long-chain fatty acid-CoA ligase activity	fatty acid metabolic process;long-chain fatty acid transport	PF00501
PF3D7_0215100	PF3D7_0215100.1	N/A	Plasmodium falciparum 3D7	Pf3D7_02_v3:622,029..624,953(-)	RING zinc finger protein, putative	protein coding gene	cytoplasm	ubiquitin protein ligase activity	protein ubiquitination	PF13920
PF3D7_0215200	PF3D7_0215200.1	N/A	Plasmodium falciparum 3D7	Pf3D7_02_v3:625,082..627,710(+)	conserved Plasmodium protein, unknown function	protein coding gene	N/A	N/A	N/A	N/A
PF3D7_0215300	PF3D7_0215300.1	ACS8	Plasmodium falciparum 3D7	Pf3D7_02_v3:628,091..632,681(-)	acyl-CoA synthetase	protein coding gene	endoplasmic reticulum;membrane	long-chain fatty acid-CoA ligase activity	fatty acid metabolic process;long-chain fatty acid transport	PF00501
PF3D7_0215400	PF3D7_0215400.1	N/A	Plasmodium falciparum 3D7	Pf3D7_02_v3:634,417..639,395(-)	conserved Plasmodium protein, unknown function	protein coding gene	N/A	N/A	N/A	N/A
PF3D7_0215500	PF3D7_0215500.1	N/A	Plasmodium falciparum 3D7	Pf3D7_02_v3:639,847..643,411(+)	conserved Plasmodium protein, unknown function	protein coding gene	N/A	N/A	N/A	N/A
PF3D7_0215600	PF3D7_0215600.1	GET2	Plasmodium falciparum 3D7	Pf3D7_02_v3:642,807..644,902(-)	Golgi to ER traffic protein 2	protein coding gene	N/A	protein binding	N/A	N/A
PF3D7_0215700	PF3D7_0215700.1	RPB2	Plasmodium falciparum 3D7	Pf3D7_02_v3:645,368..650,460(+)	DNA-directed RNA polymerase II subunit RPB2, putative	protein coding gene	RNA polymerase II, core complex;nucleus	DNA-directed 5'-3' RNA polymerase activity	transcription by RNA polymerase II	PF00562;PF04560;PF04561;PF04563;PF04565;PF04566;PF04567
PF3D7_0215800	PF3D7_0215800.1	ORC5	Plasmodium falciparum 3D7	Pf3D7_02_v3:650,472..653,693(-)	origin recognition complex subunit 5	protein coding gene	nuclear origin of replication recognition complex;nuclear pre-replicative complex	ATP binding;ATP hydrolysis activity;DNA replication origin binding	DNA replication initiation	PF14630
PF3D7_0215900	PF3D7_0215900.1	DHHC11	Plasmodium falciparum 3D7	Pf3D7_02_v3:654,918..656,840(-)	palmitoyltransferase DHHC11, putative	protein coding gene	Golgi apparatus;endoplasmic reticulum	palmitoyltransferase activity;protein-cysteine S-palmitoyltransferase activity;zinc ion binding	peptidyl-L-cysteine S-palmitoylation;protein palmitoylation;protein targeting to membrane	PF01529
PF3D7_0216000	PF3D7_0216000.1	N/A	Plasmodium falciparum 3D7	Pf3D7_02_v3:657,770..664,734(+)	DEAD/DEAH box helicase, putative	protein coding gene	SWI/SNF complex;nucleus	ATP-dependent activity, acting on DNA;DNA binding;DNA helicase activity	ATP-dependent chromatin remodeling;chromatin remodeling;positive regulation of transcription by RNA polymerase II	PF00176;PF00271
PF3D7_0216100	PF3D7_0216100.1	N/A	Plasmodium falciparum 3D7	Pf3D7_02_v3:664,805..668,532(-)	conserved Plasmodium protein, unknown function	protein coding gene	N/A	N/A	N/A	N/A
PF3D7_0216200	PF3D7_0216200.1	N/A	Plasmodium falciparum 3D7	Pf3D7_02_v3:668,745..670,058(-)	Alba domain-containing protein, putative	protein coding gene	N/A	N/A	N/A	N/A
PF3D7_0216300	PF3D7_0216300.1	N/A	Plasmodium falciparum 3D7	Pf3D7_02_v3:670,210..675,095(+)	conserved Plasmodium protein, unknown function	protein coding gene	nucleus	histone binding	regulation of double-strand break repair	N/A
PF3D7_0216400	PF3D7_0216400.1	VPS45	Plasmodium falciparum 3D7	Pf3D7_02_v3:675,368..678,010(+)	vacuolar protein sorting-associated protein 45	protein coding gene	Golgi membrane;cytoplasm	N/A	import into cell;intracellular protein transport;protein transport;vesicle-mediated transport	PF00995
PF3D7_0216500	PF3D7_0216500.1	N/A	Plasmodium falciparum 3D7	Pf3D7_02_v3:678,050..685,025(+)	conserved Plasmodium protein, unknown function	protein coding gene	N/A	N/A	N/A	N/A
PF3D7_0216600	PF3D7_0216600.1	N/A	Plasmodium falciparum 3D7	Pf3D7_02_v3:685,475..689,382(+)	sugar transporter, putative	protein coding gene	membrane	N/A	N/A	PF03083
PF3D7_0216700	PF3D7_0216700.1	ATG11	Plasmodium falciparum 3D7	Pf3D7_02_v3:689,543..695,989(+)	autophagy-related protein 11, putative	protein coding gene	N/A	N/A	N/A	N/A
PF3D7_0216700	PF3D7_0216700.2	ATG11	Plasmodium falciparum 3D7	Pf3D7_02_v3:689,543..695,989(+)	autophagy-related protein 11, putative	protein coding gene	N/A	protein binding	N/A	N/A
PF3D7_0216800	PF3D7_0216800.1	N/A	Plasmodium falciparum 3D7	Pf3D7_02_v3:695,848..699,564(-)	TMEM121 domain-containing protein, putative	protein coding gene	extracellular space;integral component of membrane	N/A	N/A	PF14997
PF3D7_0216900	PF3D7_0216900.1	N/A	Plasmodium falciparum 3D7	Pf3D7_02_v3:701,245..702,894(+)	conserved Plasmodium protein, unknown function	protein coding gene	N/A	N/A	N/A	N/A
PF3D7_0217000	PF3D7_0217000.1	N/A	Plasmodium falciparum 3D7	Pf3D7_02_v3:703,060..706,862(-)	conserved Plasmodium membrane protein, unknown function	protein coding gene	integral component of membrane	N/A	N/A	N/A
PF3D7_0217100	PF3D7_0217100.1	N/A	Plasmodium falciparum 3D7	Pf3D7_02_v3:707,101..709,839(+)	ATP synthase subunit alpha, mitochondrial	protein coding gene	mitochondrion;plasma membrane;proton-transporting ATP synthase complex, catalytic core F(1)	ADP binding;ATP binding;proton-transporting ATP synthase activity, rotational mechanism	ATP synthesis coupled proton transport	PF00006;PF00306;PF02874
PF3D7_0217200	PF3D7_0217200.1	N/A	Plasmodium falciparum 3D7	Pf3D7_02_v3:709,474..715,607(-)	conserved Plasmodium protein, unknown function	protein coding gene	N/A	N/A	N/A	N/A
PF3D7_0217300	PF3D7_0217300.1	AP2S	Plasmodium falciparum 3D7	Pf3D7_02_v3:715,609..716,549(-)	AP-2 complex subunit sigma, putative	protein coding gene	clathrin adaptor complex;intracellular membrane-bounded organelle	protein binding	intracellular protein transport;vesicle-mediated transport	PF01217
PF3D7_0217400	PF3D7_0217400.1	N/A	Plasmodium falciparum 3D7	Pf3D7_02_v3:717,227..719,177(+)	conserved protein, unknown function	protein coding gene	mitochondrion	N/A	N/A	N/A
PF3D7_0217500	PF3D7_0217500.1	CDPK1	Plasmodium falciparum 3D7	Pf3D7_02_v3:719,266..723,617(+)	calcium-dependent protein kinase 1	protein coding gene	cytoplasm;membrane;nucleus;plasma membrane;symbiont-containing vacuolar space;symbiont-containing vacuole;symbiont-containing vacuole membrane	14-3-3 protein binding;calcium-dependent protein serine/threonine kinase activity;calmodulin binding;protein binding;protein serine/threonine kinase activity	entry into host;exit from host cell;intracellular signal transduction;peptidyl-serine phosphorylation;protein autophosphorylation;protein phosphorylation;response to drug;response to xenobiotic stimulus	PF00069;PF13499
PF3D7_0217600	PF3D7_0217600.1	N/A	Plasmodium falciparum 3D7	Pf3D7_02_v3:723,183..730,639(-)	conserved Plasmodium protein, unknown function	protein coding gene	N/A	N/A	N/A	N/A
PF3D7_0217700	PF3D7_0217700.1	N/A	Plasmodium falciparum 3D7	Pf3D7_02_v3:731,101..733,231(-)	E2F-associated phosphoprotein, putative	protein coding gene	nucleus	N/A	positive regulation of cell population proliferation	PF10238
PF3D7_0217800	PF3D7_0217800.1	RPS26	Plasmodium falciparum 3D7	Pf3D7_02_v3:733,477..734,855(+)	40S ribosomal protein S26	protein coding gene	cytosolic small ribosomal subunit;nucleus	mRNA binding;structural constituent of ribosome	translation	PF01283
PF3D7_0217900	PF3D7_0217900.1	N/A	Plasmodium falciparum 3D7	Pf3D7_02_v3:734,887..738,046(-)	thioesterase/thiol ester dehydrase-isomerase, putative	protein coding gene	mitochondrion	acyl-CoA hydrolase activity	acyl-CoA metabolic process	N/A
PF3D7_0218000	PF3D7_0218000.1	RFC2	Plasmodium falciparum 3D7	Pf3D7_02_v3:738,216..740,285(+)	replication factor C subunit 2, putative	protein coding gene	DNA replication factor C complex;nucleus	RNA binding	DNA repair;DNA replication;DNA-dependent DNA replication	PF08542;PF13177
PF3D7_0218100	PF3D7_0218100.1	N/A	Plasmodium falciparum 3D7	Pf3D7_02_v3:740,884..742,775(+)	conserved protein, unknown function	protein coding gene	N/A	N/A	N/A	N/A
PF3D7_0218200	PF3D7_0218200.1	N/A	Plasmodium falciparum 3D7	Pf3D7_02_v3:742,842..746,913(-)	SUZ domain-containing protein, putative	protein coding gene	cytosol	rRNA (guanine-N1-)-methyltransferase activity	ribosomal large subunit assembly	PF12752
PF3D7_0218300	PF3D7_0218300.1	N/A	Plasmodium falciparum 3D7	Pf3D7_02_v3:747,303..749,586(-)	rRNA methyltransferase, putative	protein coding gene	apicoplast	rRNA (guanine-N1-)-methyltransferase activity	ribosomal large subunit assembly	PF00588;PF08032
PF3D7_0218400	PF3D7_0218400.1	DDX47	Plasmodium falciparum 3D7	Pf3D7_02_v3:749,749..751,772(-)	ATP-dependent RNA helicase DDX47, putative	protein coding gene	nucleus	RNA helicase activity	rRNA processing	PF00270;PF00271
PF3D7_0218500	PF3D7_0218500.1	SNRPD2	Plasmodium falciparum 3D7	Pf3D7_02_v3:752,461..754,956(+)	small nuclear ribonucleoprotein Sm D2, putative	protein coding gene	U1 snRNP;U2 snRNP;U4/U6 x U5 tri-snRNP complex;U5 snRNP;catalytic step 2 spliceosome;precatalytic spliceosome;spliceosomal complex	RNA binding	RNA splicing;RNA splicing, via transesterification reactions;spliceosomal snRNP assembly	PF01423
PF3D7_0218600	PF3D7_0218600.1	N/A	Plasmodium falciparum 3D7	Pf3D7_02_v3:755,057..763,428(+)	patatin-like phospholipase, putative	protein coding gene	cytoplasm;lipid droplet;membrane	lipase activity;triglyceride lipase activity	lipid homeostasis;lipid metabolic process;triglyceride catabolic process	N/A
PF3D7_0218700	PF3D7_0218700.1	PRP45	Plasmodium falciparum 3D7	Pf3D7_02_v3:762,841..765,517(-)	pre-mRNA-processing protein 45, putative	protein coding gene	nucleus	N/A	N/A	PF02731
PF3D7_0219100	PF3D7_0219100.1	N/A	Plasmodium falciparum 3D7	Pf3D7_02_v3:769,194..771,126(+)	saccharopine dehydrogenase, putative	protein coding gene	lipid droplet;mitochondrion;plasma membrane	N/A	glycolipid biosynthetic process	PF03435
PF3D7_0219200	PF3D7_0219200.1	RPS30	Plasmodium falciparum 3D7	Pf3D7_02_v3:771,928..773,349(+)	40S ribosomal protein S30	protein coding gene	cytosolic small ribosomal subunit	structural constituent of ribosome	translation	PF04758
PF3D7_0219300	PF3D7_0219300.1	N/A	Plasmodium falciparum 3D7	Pf3D7_02_v3:773,171..774,191(-)	conserved Plasmodium protein, unknown function	protein coding gene	N/A	N/A	N/A	N/A
PF3D7_0219400	PF3D7_0219400.1	N/A	Plasmodium falciparum 3D7	Pf3D7_02_v3:774,447..776,838(+)	ribosome associated membrane protein RAMP4, putative	protein coding gene	N/A	N/A	endoplasmic reticulum unfolded protein response;protein glycosylation	PF06624
PF3D7_0219500	PF3D7_0219500.1	N/A	Plasmodium falciparum 3D7	Pf3D7_02_v3:776,418..778,478(-)	pseudouridine synthase, putative	protein coding gene	Maurer's cleft;apicoplast	pseudouridylate synthase activity	rRNA modification	PF00849;PF01479
PF3D7_0219600	PF3D7_0219600.1	RFC1	Plasmodium falciparum 3D7	Pf3D7_02_v3:778,816..782,444(-)	replication factor C subunit 1	protein coding gene	DNA replication factor C complex;nuclear periphery;nucleus	DNA binding	DNA repair;DNA replication	PF00004;PF00533;PF08519
PF3D7_0219700	PF3D7_0219700.1	GEXP20	Plasmodium falciparum 3D7	Pf3D7_02_v3:783,271..784,917(-)	Plasmodium exported protein (PHISTc), unknown function	protein coding gene	Maurer's cleft;host cell	N/A	N/A	PF09687
PF3D7_0219800	PF3D7_0219800.1	N/A	Plasmodium falciparum 3D7	Pf3D7_02_v3:786,298..790,454(-)	Plasmodium exported protein (PHISTc), unknown function	protein coding gene	host cell	N/A	N/A	PF09687
PF3D7_0219900	PF3D7_0219900.1	N/A	Plasmodium falciparum 3D7	Pf3D7_02_v3:790,390..792,432(+)	Plasmodium exported protein, unknown function	protein coding gene	host cell	N/A	N/A	N/A
PF3D7_0220000	PF3D7_0220000.1	LSA3	Plasmodium falciparum 3D7	Pf3D7_02_v3:794,978..801,981(+)	liver stage antigen 3	protein coding gene	host cell surface;merozoite dense granule	N/A	N/A	N/A
PF3D7_0220100	PF3D7_0220100.1	N/A	Plasmodium falciparum 3D7	Pf3D7_02_v3:803,384..807,811(+)	DnaJ protein, putative	protein coding gene	Maurer's cleft	N/A	N/A	PF00226;PF09687;PF14308
PF3D7_0220200	PF3D7_0220200.1	N/A	Plasmodium falciparum 3D7	Pf3D7_02_v3:809,073..812,695(-)	Plasmodium exported protein, unknown function	protein coding gene	Maurer's cleft;host cell	N/A	N/A	N/A
PF3D7_0220300	PF3D7_0220300.1	N/A	Plasmodium falciparum 3D7	Pf3D7_02_v3:812,892..815,853(-)	Plasmodium exported protein, unknown function	protein coding gene	host cell	N/A	N/A	N/A
PF3D7_0220500	PF3D7_0220500.1	N/A	Plasmodium falciparum 3D7	Pf3D7_02_v3:823,293..825,588(-)	Plasmodium exported protein (hyp2), unknown function	protein coding gene	host cell	N/A	N/A	N/A
PF3D7_0220600	PF3D7_0220600.1	N/A	Plasmodium falciparum 3D7	Pf3D7_02_v3:830,123..833,035(+)	Plasmodium exported protein (hyp9), unknown function	protein coding gene	host cell	N/A	N/A	N/A
PF3D7_0220700	PF3D7_0220700.1	N/A	Plasmodium falciparum 3D7	Pf3D7_02_v3:833,056..834,963(+)	Plasmodium exported protein (hyp9), unknown function	protein coding gene	host cell	N/A	N/A	N/A
PF3D7_0220800	PF3D7_0220800.1	CLAG2	Plasmodium falciparum 3D7	Pf3D7_02_v3:838,594..844,668(+)	cytoadherence linked asexual protein 2	protein coding gene	rhoptry	N/A	N/A	PF03805
PF3D7_0221000	PF3D7_0221000.1	N/A	Plasmodium falciparum 3D7	Pf3D7_02_v3:848,092..849,119(+)	Plasmodium exported protein, unknown function	protein coding gene	host cell;membrane	N/A	N/A	N/A
PF3D7_0221200	PF3D7_0221200.1	N/A	Plasmodium falciparum 3D7	Pf3D7_02_v3:853,607..856,315(+)	Plasmodium exported protein (hyp15), unknown function	protein coding gene	host cell	N/A	N/A	N/A
PF3D7_0221400	PF3D7_0221400.1	N/A	Plasmodium falciparum 3D7	Pf3D7_02_v3:860,466..861,504(+)	stevor	protein coding gene	Maurer's cleft	N/A	modulation by symbiont of host erythrocyte aggregation	PF17410
PF3D7_0221700	PF3D7_0221700.1	N/A	Plasmodium falciparum 3D7	Pf3D7_02_v3:868,884..871,778(-)	Plasmodium exported protein, unknown function	protein coding gene	Maurer's cleft;host cell	N/A	N/A	N/A
PF3D7_0221800	PF3D7_0221800.1	N/A	Plasmodium falciparum 3D7	Pf3D7_02_v3:871,835..873,795(+)	hypothetical protein	protein coding gene	N/A	N/A	N/A	N/A
PF3D7_0222000	PF3D7_0222000.1	EPF1	Plasmodium falciparum 3D7	Pf3D7_02_v3:876,984..877,832(+)	exported protein family 1	protein coding gene	Maurer's cleft	N/A	N/A	PF14308
PF3D7_0222100	PF3D7_0222100.1	MC-2TM	Plasmodium falciparum 3D7	Pf3D7_02_v3:878,211..879,540(-)	Pfmc-2TM Maurer's cleft two transmembrane protein	protein coding gene	Maurer's cleft;integral component of membrane;nucleus	N/A	translocation of peptides or proteins into host	N/A
PF3D7_0222200	PF3D7_0222200.1	EPF3	Plasmodium falciparum 3D7	Pf3D7_02_v3:881,469..882,267(-)	exported protein family 3	protein coding gene	Maurer's cleft;host cell cytoplasm	N/A	N/A	PF09715
PF3D7_0222500	PF3D7_0222500.1	RIF	Plasmodium falciparum 3D7	Pf3D7_02_v3:889,660..890,745(+)	rifin	protein coding gene	host cell plasma membrane	N/A	antigenic variation	PF02009
PF3D7_0222600	PF3D7_0222600.1	RIF	Plasmodium falciparum 3D7	Pf3D7_02_v3:892,856..894,206(+)	rifin	protein coding gene	Maurer's cleft;host cell plasma membrane;symbiont-containing vacuole	N/A	antigenic variation;cytoadherence to microvasculature, mediated by symbiont protein;modulation by symbiont of host erythrocyte aggregation	PF02009
PF3D7_0222700	PF3D7_0222700.1	RIF	Plasmodium falciparum 3D7	Pf3D7_02_v3:896,226..897,420(+)	rifin	protein coding gene	host cell plasma membrane	N/A	antigenic variation	PF02009
PF3D7_0222800	PF3D7_0222800.1	N/A	Plasmodium falciparum 3D7	Pf3D7_02_v3:899,430..900,445(+)	stevor	protein coding gene	Maurer's cleft	N/A	modulation by symbiont of host erythrocyte aggregation	PF17410
PF3D7_0223100	PF3D7_0223100.1	RIF	Plasmodium falciparum 3D7	Pf3D7_02_v3:904,551..905,775(+)	rifin	protein coding gene	Maurer's cleft;host cell plasma membrane;symbiont-containing vacuole	host cell surface receptor binding	antigenic variation;cytoadherence to microvasculature, mediated by symbiont protein;evasion of host immune response;modulation by symbiont of host erythrocyte aggregation	PF02009
PF3D7_0223200	PF3D7_0223200.1	RIF	Plasmodium falciparum 3D7	Pf3D7_02_v3:907,678..908,861(+)	rifin	protein coding gene	host cell plasma membrane	N/A	antigenic variation	PF02009
PF3D7_0223300	PF3D7_0223300.1	N/A	Plasmodium falciparum 3D7	Pf3D7_02_v3:909,350..911,054(+)	erythrocyte membrane protein 1 (PfEMP1), exon 2	protein coding gene	N/A	N/A	N/A	PF15445
PF3D7_0223400	PF3D7_0223400.1	RIF	Plasmodium falciparum 3D7	Pf3D7_02_v3:913,244..914,457(+)	rifin	protein coding gene	Maurer's cleft;host cell plasma membrane;symbiont-containing vacuole	N/A	antigenic variation;cytoadherence to microvasculature, mediated by symbiont protein;modulation by symbiont of host erythrocyte aggregation	PF02009
PF3D7_0223500	PF3D7_0223500.1	VAR	Plasmodium falciparum 3D7	Pf3D7_02_v3:916,352..923,648(-)	erythrocyte membrane protein 1, PfEMP1	protein coding gene	host cell plasma membrane;infected host cell surface knob	cell adhesion molecule binding;host cell surface receptor binding	antigenic variation;cell-cell adhesion;cytoadherence to microvasculature, mediated by symbiont protein;modulation by symbiont of host erythrocyte aggregation	PF03011;PF05424;PF15445;PF15447;PF18562
PF3D7_0300100	PF3D7_0300100.1	VAR	Plasmodium falciparum 3D7	Pf3D7_03_v3:36,965..44,482(+)	erythrocyte membrane protein 1, PfEMP1	protein coding gene	N/A	N/A	N/A	PF03011;PF05424;PF15445;PF15447;PF18562
PF3D7_0300200	PF3D7_0300200.1	RIF	Plasmodium falciparum 3D7	Pf3D7_03_v3:46,369..47,579(-)	rifin	protein coding gene	Maurer's cleft;host cell plasma membrane;symbiont-containing vacuole	N/A	antigenic variation;cytoadherence to microvasculature, mediated by symbiont protein;modulation by symbiont of host erythrocyte aggregation	PF02009
PF3D7_0300400	PF3D7_0300400.1	N/A	Plasmodium falciparum 3D7	Pf3D7_03_v3:52,280..53,273(-)	stevor	protein coding gene	Maurer's cleft;host cell membrane	N/A	modulation by symbiont of host erythrocyte aggregation	PF17410
PF3D7_0300500	PF3D7_0300500.1	RIF	Plasmodium falciparum 3D7	Pf3D7_03_v3:55,390..56,584(-)	rifin	protein coding gene	host cell plasma membrane	N/A	antigenic variation	PF02009
PF3D7_0300600	PF3D7_0300600.1	N/A	Plasmodium falciparum 3D7	Pf3D7_03_v3:58,307..58,519(-)	Plasmodium exported protein, unknown function, fragment	protein coding gene	N/A	N/A	N/A	N/A
PF3D7_0300700	PF3D7_0300700.1	RIF	Plasmodium falciparum 3D7	Pf3D7_03_v3:61,445..62,714(+)	rifin	protein coding gene	Maurer's cleft;host cell plasma membrane;symbiont-containing vacuole	N/A	antigenic variation;cytoadherence to microvasculature, mediated by symbiont protein;modulation by symbiont of host erythrocyte aggregation	PF02009
PF3D7_0300800	PF3D7_0300800.1	RIF	Plasmodium falciparum 3D7	Pf3D7_03_v3:64,572..65,783(+)	rifin	protein coding gene	Maurer's cleft;host cell plasma membrane;symbiont-containing vacuole	N/A	antigenic variation;cytoadherence to microvasculature, mediated by symbiont protein;modulation by symbiont of host erythrocyte aggregation	PF02009
PF3D7_0300900	PF3D7_0300900.1	N/A	Plasmodium falciparum 3D7	Pf3D7_03_v3:67,870..68,761(+)	stevor	protein coding gene	N/A	N/A	N/A	PF17410
PF3D7_0301000	PF3D7_0301000.1	ACS2	Plasmodium falciparum 3D7	Pf3D7_03_v3:69,460..71,919(-)	acyl-CoA synthetase	protein coding gene	endoplasmic reticulum;membrane	AMP binding;long-chain fatty acid-CoA ligase activity	fatty acid metabolic process	PF00501
PF3D7_0301100	PF3D7_0301100.1	N/A	Plasmodium falciparum 3D7	Pf3D7_03_v3:76,494..77,474(+)	Plasmodium exported protein (hyp13), unknown function	protein coding gene	host cell	N/A	N/A	N/A
PF3D7_0301200	PF3D7_0301200.1	FIKK3	Plasmodium falciparum 3D7	Pf3D7_03_v3:78,154..81,283(-)	serine/threonine protein kinase, FIKK family	protein coding gene	cytoplasm;nucleus;rhoptry	protein serine/threonine kinase activity	intracellular signal transduction;modulation by symbiont of host process;protein phosphorylation	PF00069
PF3D7_0301300	PF3D7_0301300.1	EH1	Plasmodium falciparum 3D7	Pf3D7_03_v3:81,939..84,290(-)	epoxide hydrolase 1	protein coding gene	host cell cytosol;host cell periphery	epoxide hydrolase activity;hydrolase activity;spectrin binding	N/A	PF00561
PF3D7_0301400	PF3D7_0301400.1	N/A	Plasmodium falciparum 3D7	Pf3D7_03_v3:85,289..86,678(-)	Plasmodium exported protein, unknown function	protein coding gene	host cell	N/A	N/A	N/A
PF3D7_0301500	PF3D7_0301500.1	N/A	Plasmodium falciparum 3D7	Pf3D7_03_v3:87,480..90,921(-)	Plasmodium exported protein, unknown function	protein coding gene	host cell	N/A	N/A	N/A
PF3D7_0301600	PF3D7_0301600.1	GEXP21	Plasmodium falciparum 3D7	Pf3D7_03_v3:91,001..94,089(-)	Plasmodium exported protein (hyp1), unknown function	protein coding gene	Maurer's cleft;host cell	N/A	N/A	N/A
PF3D7_0301700	PF3D7_0301700.1	N/A	Plasmodium falciparum 3D7	Pf3D7_03_v3:95,216..99,115(-)	Plasmodium exported protein, unknown function	protein coding gene	Maurer's cleft;extracellular vesicle;host cell;host cell cytoplasm	protein binding	N/A	N/A
PF3D7_0301800	PF3D7_0301800.1	N/A	Plasmodium falciparum 3D7	Pf3D7_03_v3:103,118..105,748(+)	Plasmodium exported protein, unknown function	protein coding gene	Maurer's cleft;host cell	N/A	N/A	N/A
PF3D7_0301900	PF3D7_0301900.1	N/A	Plasmodium falciparum 3D7	Pf3D7_03_v3:105,433..107,500(-)	conserved protein, unknown function	protein coding gene	N/A	N/A	N/A	N/A
PF3D7_0302000	PF3D7_0302000.1	PRP46	Plasmodium falciparum 3D7	Pf3D7_03_v3:107,622..110,309(-)	pre-mRNA-splicing factor PRP46, putative	protein coding gene	Cul4-RING E3 ubiquitin ligase complex;Prp19 complex;catalytic step 2 spliceosome;spliceosomal complex	N/A	mRNA splicing, via spliceosome	PF00400
PF3D7_0302100	PF3D7_0302100.1	SRPK1	Plasmodium falciparum 3D7	Pf3D7_03_v3:112,158..118,863(+)	serine/threonine protein kinase	protein coding gene	cytoplasm;nucleus	MAP kinase activity;protein serine/threonine kinase activity	intracellular signal transduction;protein phosphorylation;regulation of gene expression;regulation of mRNA processing;spliceosomal complex assembly	PF00069
PF3D7_0302200	PF3D7_0302200.1	CLAG3.2	Plasmodium falciparum 3D7	Pf3D7_03_v3:119,098..124,924(+)	cytoadherence linked asexual protein 3.2	protein coding gene	host cell plasma membrane;nucleus;rhoptry	anion channel activity;cell adhesion molecule binding;protein binding	cytoadherence to microvasculature, mediated by symbiont protein	PF03805
PF3D7_0302500	PF3D7_0302500.1	CLAG3.1	Plasmodium falciparum 3D7	Pf3D7_03_v3:134,486..141,185(+)	cytoadherence linked asexual protein 3.1	protein coding gene	extracellular vesicle;host cell plasma membrane;nucleus;rhoptry	RNA binding;anion channel activity;cell adhesion molecule binding;protein binding	cytoadherence to microvasculature, mediated by symbiont protein	PF03805
PF3D7_0302600	PF3D7_0302600.1	ABCB4	Plasmodium falciparum 3D7	Pf3D7_03_v3:141,335..146,155(+)	ABC transporter B family member 4, putative	protein coding gene	apicoplast;integral component of membrane;mitochondrial inner membrane	ABC-type oligopeptide transporter activity;ATPase-coupled transmembrane transporter activity;xenobiotic transmembrane transporter activity	oligopeptide export from mitochondrion;response to xenobiotic stimulus;xenobiotic transmembrane transport	PF00005;PF00664
PF3D7_0302700	PF3D7_0302700.1	N/A	Plasmodium falciparum 3D7	Pf3D7_03_v3:146,052..147,270(-)	CDGSH iron-sulfur domain-containing protein, putative	protein coding gene	mitochondrion	N/A	N/A	PF09360
PF3D7_0302800	PF3D7_0302800.1	N/A	Plasmodium falciparum 3D7	Pf3D7_03_v3:147,724..150,348(-)	RNA-binding protein, putative	protein coding gene	nucleus	mRNA binding	N/A	N/A
PF3D7_0302900	PF3D7_0302900.1	N/A	Plasmodium falciparum 3D7	Pf3D7_03_v3:151,935..158,150(-)	exportin-1, putative	protein coding gene	cytoplasm;nucleus	nuclear export signal receptor activity;obsolete protein transporter activity	protein export from nucleus;regulation of protein export from nucleus;ribosomal large subunit export from nucleus;ribosomal small subunit export from nucleus	PF03810;PF08389;PF08767;PF18784;PF18787
PF3D7_0303000	PF3D7_0303000.1	NSF	Plasmodium falciparum 3D7	Pf3D7_03_v3:159,315..161,740(-)	N-ethylmaleimide-sensitive fusion protein	protein coding gene	Golgi stack;food vacuole;host cell cytoplasm	ATP hydrolysis activity	Golgi to plasma membrane protein transport;Golgi vesicle docking;endoplasmic reticulum to Golgi vesicle-mediated transport;intra-Golgi vesicle-mediated transport	PF00004;PF17862
PF3D7_0303100	PF3D7_0303100.1	N/A	Plasmodium falciparum 3D7	Pf3D7_03_v3:161,748..168,348(-)	CLP1 P-loop domain-containing protein, putative	protein coding gene	nucleus	polynucleotide 5'-hydroxyl-kinase activity	RNA processing;cleavage in ITS2 between 5.8S rRNA and LSU-rRNA of tricistronic rRNA transcript (SSU-rRNA, 5.8S rRNA, LSU-rRNA)	PF16575
PF3D7_0303200	PF3D7_0303200.1	N/A	Plasmodium falciparum 3D7	Pf3D7_03_v3:168,679..174,837(+)	lipin, putative	protein coding gene	cytoplasm;endoplasmic reticulum;nucleus	phosphatidate phosphatase activity	cellular lipid metabolic process;phosphatidic acid metabolic process	PF04571;PF08235;PF16876
PF3D7_0303300	PF3D7_0303300.1	RPB6	Plasmodium falciparum 3D7	Pf3D7_03_v3:174,382..176,798(-)	DNA-directed RNA polymerases I, II, and III subunit RPABC2, putative	protein coding gene	RNA polymerase I complex;RNA polymerase II, core complex;RNA polymerase III complex	DNA-directed 5'-3' RNA polymerase activity	transcription by RNA polymerase II	PF01192
PF3D7_0303400	PF3D7_0303400.1	DHHC1	Plasmodium falciparum 3D7	Pf3D7_03_v3:177,446..181,753(+)	palmitoyltransferase DHHC1	protein coding gene	Golgi membrane;inner membrane pellicle complex	palmitoyltransferase activity	protein palmitoylation	PF01529;PF12796
PF3D7_0303500	PF3D7_0303500.1	N/A	Plasmodium falciparum 3D7	Pf3D7_03_v3:182,267..189,424(+)	spindle pole body protein, putative	protein coding gene	centrosome;equatorial microtubule organizing center;gamma-tubulin complex;nucleus	gamma-tubulin binding	cytoplasmic microtubule organization;meiotic cell cycle;microtubule nucleation by interphase microtubule organizing center;mitotic cell cycle;spindle assembly	PF04130;PF17681
PF3D7_0303600	PF3D7_0303600.1	Plrx	Plasmodium falciparum 3D7	Pf3D7_03_v3:189,682..190,816(+)	plasmoredoxin	protein coding gene	N/A	protein disulfide isomerase activity	N/A	PF13905
PF3D7_0303700	PF3D7_0303700.1	BCKDH-E2	Plasmodium falciparum 3D7	Pf3D7_03_v3:191,168..193,072(-)	lipoamide acyltransferase component of branched-chain alpha-keto acid dehydrogenase complex	protein coding gene	cytoplasm;mitochondrion	acetyltransferase activity;lipoic acid binding	N/A	PF00198;PF00364
PF3D7_0303800	PF3D7_0303800.1	N/A	Plasmodium falciparum 3D7	Pf3D7_03_v3:193,499..196,492(+)	IBR domain protein, putative	protein coding gene	cytoplasm;nucleus;ubiquitin ligase complex	ubiquitin conjugating enzyme binding;ubiquitin protein ligase activity	positive regulation of proteasomal ubiquitin-dependent protein catabolic process;protein polyubiquitination;ubiquitin-dependent protein catabolic process	PF01485
PF3D7_0303900	PF3D7_0303900.1	N/A	Plasmodium falciparum 3D7	Pf3D7_03_v3:196,570..197,601(-)	phosphatidylethanolamine-binding protein, putative	protein coding gene	N/A	N/A	N/A	PF01161
PF3D7_0304000	PF3D7_0304000.1	IMC1a	Plasmodium falciparum 3D7	Pf3D7_03_v3:198,542..201,584(-)	inner membrane complex protein 1a, putative	protein coding gene	inner membrane pellicle complex	N/A	entry into host	PF12314
PF3D7_0304100	PF3D7_0304100.1	IMC1e	Plasmodium falciparum 3D7	Pf3D7_03_v3:203,251..206,328(+)	inner membrane complex protein 1e, putative	protein coding gene	inner membrane pellicle complex;nucleus	N/A	N/A	PF12314
PF3D7_0304200	PF3D7_0304200.1	EHD	Plasmodium falciparum 3D7	Pf3D7_03_v3:206,611..208,959(-)	EH domain-containing protein	protein coding gene	cytosol;intracellular membrane-bounded organelle;membrane;vesicle	RNA binding;protein binding	endocytosis;endosomal transport	PF00350;PF12763;PF16880;PF18150
PF3D7_0304300	PF3D7_0304300.1	N/A	Plasmodium falciparum 3D7	Pf3D7_03_v3:211,970..217,021(+)	conserved Plasmodium protein, unknown function	protein coding gene	N/A	N/A	N/A	N/A
PF3D7_0304400	PF3D7_0304400.1	RPL44	Plasmodium falciparum 3D7	Pf3D7_03_v3:217,059..218,992(+)	60S ribosomal protein L44	protein coding gene	cytosolic large ribosomal subunit;nucleus	structural constituent of ribosome	translation	PF00935
PF3D7_0304500	PF3D7_0304500.1	GLP1	Plasmodium falciparum 3D7	Pf3D7_03_v3:218,780..220,345(-)	1-cys-glutaredoxin-like protein-1	protein coding gene	cytosol;mitochondrial matrix;mitochondrion	disulfide oxidoreductase activity;glutathione disulfide oxidoreductase activity	N/A	PF00462
PF3D7_0304600	PF3D7_0304600.1	CSP	Plasmodium falciparum 3D7	Pf3D7_03_v3:221,112..223,145(-)	circumsporozoite (CS) protein	protein coding gene	anchored component of plasma membrane;cell surface;host cell cytoplasm;host cell nucleus	heparan sulfate proteoglycan binding;host cell surface binding	entry into host;exit from host cell	PF00090
PF3D7_0304700	PF3D7_0304700.1	N/A	Plasmodium falciparum 3D7	Pf3D7_03_v3:224,160..225,793(-)	conserved Plasmodium protein, unknown function	protein coding gene	N/A	N/A	N/A	N/A
PF3D7_0304800	PF3D7_0304800.1	N/A	Plasmodium falciparum 3D7	Pf3D7_03_v3:226,915..231,648(+)	conserved Plasmodium membrane protein, unknown function	protein coding gene	N/A	N/A	N/A	N/A
PF3D7_0304900	PF3D7_0304900.1	N/A	Plasmodium falciparum 3D7	Pf3D7_03_v3:231,447..232,745(-)	conserved protein, unknown function	protein coding gene	N/A	N/A	N/A	N/A
PF3D7_0305000	PF3D7_0305000.1	EF-Ts	Plasmodium falciparum 3D7	Pf3D7_03_v3:233,621..235,461(-)	elongation factor Ts	protein coding gene	apicoplast;mitochondrial matrix	protein binding;translation elongation factor activity	mitochondrial translational elongation;translational elongation	PF00889
PF3D7_0305100	PF3D7_0305100.1	N/A	Plasmodium falciparum 3D7	Pf3D7_03_v3:236,334..248,270(-)	conserved Plasmodium protein, unknown function	protein coding gene	N/A	N/A	N/A	N/A
PF3D7_0305200	PF3D7_0305200.1	N/A	Plasmodium falciparum 3D7	Pf3D7_03_v3:250,163..255,153(+)	GRIP domain-containing protein, putative	protein coding gene	nucleus	N/A	N/A	N/A
PF3D7_0305300	PF3D7_0305300.1	N/A	Plasmodium falciparum 3D7	Pf3D7_03_v3:255,187..259,495(-)	transporter, putative	protein coding gene	integral component of membrane	N/A	N/A	N/A
PF3D7_0305400	PF3D7_0305400.1	N/A	Plasmodium falciparum 3D7	Pf3D7_03_v3:259,959..261,372(+)	conserved protein, unknown function	protein coding gene	N/A	N/A	N/A	N/A
PF3D7_0305500	PF3D7_0305500.1	N/A	Plasmodium falciparum 3D7	Pf3D7_03_v3:261,400..274,210(-)	protein dopey homolog, putative	protein coding gene	endosome;membrane;nucleus;peroxisome;trans-Golgi network	N/A	N/A	PF04118
PF3D7_0305600	PF3D7_0305600.1	APE1	Plasmodium falciparum 3D7	Pf3D7_03_v3:274,618..277,999(-)	DNA-(apurinic or apyrimidinic site) endonuclease	protein coding gene	mitochondrion;nucleus	3'-5' exonuclease activity;DNA-(apurinic or apyrimidinic site) endonuclease activity;double-stranded DNA 3'-5' exodeoxyribonuclease activity;phosphatase activity;phosphodiesterase I activity;ribonuclease activity	DNA repair;base-excision repair;entry into host	PF03372
PF3D7_0305700	PF3D7_0305700.1	N/A	Plasmodium falciparum 3D7	Pf3D7_03_v3:278,771..280,588(-)	ubiquitin-conjugating enzyme MMS2, putative	protein coding gene	nucleus	ubiquitin conjugating enzyme activity;ubiquitin-protein transferase activity	postreplication repair;protein K63-linked ubiquitination;protein polyubiquitination;ubiquitin-dependent protein catabolic process	PF00179
PF3D7_0305800	PF3D7_0305800.1	N/A	Plasmodium falciparum 3D7	Pf3D7_03_v3:281,916..285,260(+)	P-loop containing nucleoside triphosphate hydrolase, putative	protein coding gene	cytoplasm;mitochondrial matrix	adenylate kinase activity;nucleoside triphosphate adenylate kinase activity	AMP metabolic process;nucleoside triphosphate biosynthetic process;purine nucleotide metabolic process	PF05186
PF3D7_0305900	PF3D7_0305900.1	N/A	Plasmodium falciparum 3D7	Pf3D7_03_v3:285,291..286,154(-)	conserved Plasmodium protein, unknown function	protein coding gene	N/A	N/A	N/A	N/A
PF3D7_0306000	PF3D7_0306000.1	QCR8	Plasmodium falciparum 3D7	Pf3D7_03_v3:286,241..287,345(-)	cytochrome b-c1 complex subunit 8, putative	protein coding gene	mitochondrial respiratory chain complex III;mitochondrion	N/A	N/A	N/A
PF3D7_0306100	PF3D7_0306100.1	N/A	Plasmodium falciparum 3D7	Pf3D7_03_v3:287,946..291,323(-)	conserved Plasmodium protein, unknown function	protein coding gene	N/A	N/A	N/A	N/A
PF3D7_0306200	PF3D7_0306200.1	AHA1	Plasmodium falciparum 3D7	Pf3D7_03_v3:291,924..295,013(+)	activator of Hsp90 ATPase	protein coding gene	cytosol	ATPase activator activity;Hsp90 protein binding	positive regulation of ATP-dependent activity;protein folding	PF09229
PF3D7_0306300	PF3D7_0306300.1	GRX1	Plasmodium falciparum 3D7	Pf3D7_03_v3:294,566..297,773(-)	glutaredoxin 1	protein coding gene	N/A	antioxidant activity;protein-disulfide reductase (glutathione) activity	N/A	PF00462
PF3D7_0306400	PF3D7_0306400.1	N/A	Plasmodium falciparum 3D7	Pf3D7_03_v3:297,490..300,880(+)	FAD-dependent glycerol-3-phosphate dehydrogenase, putative	protein coding gene	mitochondrion	glycerol-3-phosphate dehydrogenase (quinone) activity	glycerophosphate shuttle	PF01266;PF16901
PF3D7_0306500	PF3D7_0306500.1	COX6C	Plasmodium falciparum 3D7	Pf3D7_03_v3:300,489..302,223(-)	cytochrome c oxidase subunit 6c, putative	protein coding gene	mitochondrial respiratory chain complex IV;mitochondrion	N/A	N/A	N/A
PF3D7_0306600	PF3D7_0306600.1	ATPTG17	Plasmodium falciparum 3D7	Pf3D7_03_v3:302,501..303,423(+)	ATP synthase-associated protein, putative	protein coding gene	apicoplast	N/A	N/A	N/A
PF3D7_0306700	PF3D7_0306700.1	EMC5	Plasmodium falciparum 3D7	Pf3D7_03_v3:303,434..305,619(+)	ER membrane protein complex subunit 5, putative	protein coding gene	EMC complex	N/A	protein folding in endoplasmic reticulum	N/A
PF3D7_0306800	PF3D7_0306800.1	CCT2	Plasmodium falciparum 3D7	Pf3D7_03_v3:305,320..308,017(-)	T-complex protein 1 subunit beta	protein coding gene	chaperonin-containing T-complex;cytosol;nucleus	unfolded protein binding	protein folding	PF00118
PF3D7_0306900	PF3D7_0306900.1	N/A	Plasmodium falciparum 3D7	Pf3D7_03_v3:309,572..312,482(+)	40S ribosomal protein S23, putative	protein coding gene	cytosolic small ribosomal subunit;nucleus;ribosome	structural constituent of ribosome	translation	PF00164
PF3D7_0307100	PF3D7_0307100.1	RPS12	Plasmodium falciparum 3D7	Pf3D7_03_v3:312,534..313,923(-)	40S ribosomal protein S12, putative	protein coding gene	cytosolic small ribosomal subunit;nucleus	structural constituent of ribosome	translation	PF01248
PF3D7_0307200	PF3D7_0307200.1	N/A	Plasmodium falciparum 3D7	Pf3D7_03_v3:314,714..316,835(-)	60S ribosomal protein L7, putative	protein coding gene	cytosolic large ribosomal subunit;nucleus	RNA binding;structural constituent of ribosome	maturation of LSU-rRNA from tricistronic rRNA transcript (SSU-rRNA, 5.8S rRNA, LSU-rRNA);translation	PF00327;PF08079
PF3D7_0307300	PF3D7_0307300.1	EB1	Plasmodium falciparum 3D7	Pf3D7_03_v3:318,804..320,336(+)	microtubule-associated protein RP/EB family, putative	protein coding gene	cytoplasmic microtubule;microtubule;microtubule organizing center;microtubule plus-end;nucleoplasm;spindle midzone	microtubule binding;microtubule plus-end binding	protein localization to microtubule;protein localization to microtubule plus-end;regulation of microtubule polymerization or depolymerization;spindle assembly	PF00307;PF03271
PF3D7_0307400	PF3D7_0307400.1	ClpP	Plasmodium falciparum 3D7	Pf3D7_03_v3:320,628..322,215(-)	ATP-dependent Clp protease proteolytic subunit	protein coding gene	apicoplast;endopeptidase Clp complex	ATP-dependent peptidase activity;ATPase binding;hydrolase activity;peptidase activity;protein binding;serine-type endopeptidase activity	plastid organization;protein quality control for misfolded or incompletely synthesized proteins;proteolysis;response to xenobiotic stimulus	PF00574
PF3D7_0307500	PF3D7_0307500.1	SKA2	Plasmodium falciparum 3D7	Pf3D7_03_v3:322,589..325,397(-)	spindle and kinetochore-associated protein 2, putative	protein coding gene	nucleus;outer kinetochore;spindle microtubule	microtubule binding	chromosome segregation;mitotic cell cycle	PF11362;PF16740
PF3D7_0307600	PF3D7_0307600.1	N/A	Plasmodium falciparum 3D7	Pf3D7_03_v3:325,654..328,649(+)	conserved Plasmodium protein, unknown function	protein coding gene	N/A	N/A	N/A	N/A
PF3D7_0307700	PF3D7_0307700.1	N/A	Plasmodium falciparum 3D7	Pf3D7_03_v3:328,477..336,120(-)	conserved Plasmodium protein, unknown function	protein coding gene	nucleus	N/A	N/A	N/A
PF3D7_0307800	PF3D7_0307800.1	N/A	Plasmodium falciparum 3D7	Pf3D7_03_v3:336,191..339,907(+)	PDZ domain-containing protein, putative	protein coding gene	apicoplast	N/A	N/A	PF00595
PF3D7_0307900	PF3D7_0307900.1	N/A	Plasmodium falciparum 3D7	Pf3D7_03_v3:339,591..352,137(-)	conserved Plasmodium protein, unknown function	protein coding gene	N/A	N/A	N/A	N/A
PF3D7_0308000	PF3D7_0308000.1	N/A	Plasmodium falciparum 3D7	Pf3D7_03_v3:353,058..355,573(+)	DNA polymerase delta small subunit, putative	protein coding gene	DNA polymerase complex;delta DNA polymerase complex	DNA-directed DNA polymerase activity	DNA biosynthetic process;DNA strand elongation involved in DNA replication	PF04042;PF18018
PF3D7_0308100	PF3D7_0308100.1	N/A	Plasmodium falciparum 3D7	Pf3D7_03_v3:355,867..361,936(+)	zinc finger protein, putative	protein coding gene	cytoplasm;membrane;nucleus	N/A	N/A	N/A
PF3D7_0308200	PF3D7_0308200.1	CCT7	Plasmodium falciparum 3D7	Pf3D7_03_v3:361,623..365,130(-)	T-complex protein 1 subunit eta	protein coding gene	chaperonin-containing T-complex;cytosol;nucleus	unfolded protein binding	protein folding	PF00118
PF3D7_0308300	PF3D7_0308300.1	PIC4	Plasmodium falciparum 3D7	Pf3D7_03_v3:365,177..366,948(-)	PhIL1-interacting candidate PIC4	protein coding gene	cell surface;inner membrane pellicle complex	N/A	N/A	N/A
PF3D7_0308500	PF3D7_0308500.1	N/A	Plasmodium falciparum 3D7	Pf3D7_03_v3:369,925..371,806(+)	activator of Hsp90 ATPase, putative	protein coding gene	nucleus	N/A	N/A	PF08327
PF3D7_0308600	PF3D7_0308600.1	PRPF19	Plasmodium falciparum 3D7	Pf3D7_03_v3:371,933..374,911(+)	pre-mRNA-processing factor 19, putative	protein coding gene	Prp19 complex;U2-type catalytic step 1 spliceosome;catalytic step 2 spliceosome;nuclear matrix;nucleus	protein binding;ubiquitin-protein transferase activity	generation of catalytic spliceosome for first transesterification step	PF00400;PF08606
PF3D7_0308700	PF3D7_0308700.1	N/A	Plasmodium falciparum 3D7	Pf3D7_03_v3:375,388..377,772(+)	conserved protein, unknown function	protein coding gene	nucleus	N/A	N/A	N/A
PF3D7_0308800	PF3D7_0308800.1	N/A	Plasmodium falciparum 3D7	Pf3D7_03_v3:377,774..378,857(+)	conserved protein, unknown function	protein coding gene	N/A	N/A	N/A	N/A
PF3D7_0308900	PF3D7_0308900.1	SF3B1	Plasmodium falciparum 3D7	Pf3D7_03_v3:378,896..383,721(-)	splicing factor 3B subunit 1, putative	protein coding gene	U2 snRNP;U2-type prespliceosome;catalytic step 2 spliceosome	RNA binding;mRNA binding	mRNA splicing, via spliceosome;spliceosomal complex assembly	PF08920
PF3D7_0309000	PF3D7_0309000.1	YVH1	Plasmodium falciparum 3D7	Pf3D7_03_v3:383,878..387,313(+)	dual specificity protein phosphatase	protein coding gene	cytoplasm;nucleus	phosphatase activity;protein binding;protein tyrosine/serine/threonine phosphatase activity;structural constituent of nuclear pore;zinc ion binding	negative regulation of nucleocytoplasmic transport;protein dephosphorylation;protein phosphorylation;regulation of cell development	PF00782
PF3D7_0309100	PF3D7_0309100.1	OMD	Plasmodium falciparum 3D7	Pf3D7_03_v3:386,977..388,538(-)	OMD protein, putative	protein coding gene	cytoplasm	N/A	cell gliding	N/A
PF3D7_0309200	PF3D7_0309200.1	ARK2	Plasmodium falciparum 3D7	Pf3D7_03_v3:388,943..396,419(-)	serine/threonine protein kinase ARK2, putative	protein coding gene	chromosome passenger complex;spindle microtubule;spindle midzone;spindle pole centrosome	histone serine kinase activity;protein serine/threonine kinase activity	mitotic spindle organization;protein phosphorylation;regulation of cytokinesis	PF00069
PF3D7_0309300	PF3D7_0309300.1	N/A	Plasmodium falciparum 3D7	Pf3D7_03_v3:397,397..401,232(+)	N2227-like protein, putative	protein coding gene	N/A	S-adenosylmethionine-dependent methyltransferase activity	N/A	PF02363;PF07942
PF3D7_0309500	PF3D7_0309500.1	AS	Plasmodium falciparum 3D7	Pf3D7_03_v3:401,933..405,904(+)	asparagine synthetase [glutamine-hydrolyzing], putative	protein coding gene	cytosol;nucleus	asparagine synthase (glutamine-hydrolyzing) activity	asparagine biosynthetic process	PF00733;PF13537
PF3D7_0309600	PF3D7_0309600.1	PfP2	Plasmodium falciparum 3D7	Pf3D7_03_v3:406,534..408,869(+)	60S acidic ribosomal protein P2	protein coding gene	Maurer's cleft;cell surface;host cell surface;nucleus	RNA binding	entry into host;protein tetramerization	PF00428
PF3D7_0309700	PF3D7_0309700.1	SBP2	Plasmodium falciparum 3D7	Pf3D7_03_v3:409,102..410,928(-)	SECIS-binding protein 2, putative	protein coding gene	ribonucleoprotein complex	mRNA 3'-UTR binding;ribonucleoprotein complex binding;selenocysteine insertion sequence binding	selenocysteine incorporation	PF01248
PF3D7_0309800	PF3D7_0309800.1	YTH2	Plasmodium falciparum 3D7	Pf3D7_03_v3:411,588..414,117(+)	YTH domain-containing protein 2	protein coding gene	cytoplasm	N6-methyladenosine-containing RNA binding;mRNA binding	mRNA destabilization;regulation of translation	PF04146
PF3D7_0309900	PF3D7_0309900.1	N/A	Plasmodium falciparum 3D7	Pf3D7_03_v3:414,206..419,975(-)	conserved Plasmodium protein, unknown function	protein coding gene	N/A	N/A	N/A	N/A
PF3D7_0310000	PF3D7_0310000.1	N/A	Plasmodium falciparum 3D7	Pf3D7_03_v3:420,417..421,877(+)	50S ribosomal protein L9, apicoplast, putative	protein coding gene	apicoplast	N/A	N/A	PF01281
PF3D7_0310100	PF3D7_0310100.1	CDPK3	Plasmodium falciparum 3D7	Pf3D7_03_v3:422,379..424,680(+)	calcium-dependent protein kinase 3	protein coding gene	cytoplasm;nucleus	calcium-dependent protein serine/threonine kinase activity;calmodulin binding;calmodulin-dependent protein kinase activity	intracellular signal transduction;peptidyl-serine phosphorylation;protein autophosphorylation;protein phosphorylation	PF00069;PF13499
PF3D7_0310200	PF3D7_0310200.1	N/A	Plasmodium falciparum 3D7	Pf3D7_03_v3:426,151..441,005(+)	phd finger protein, putative	protein coding gene	nucleus	N/A	response to xenobiotic stimulus	PF13831;PF13832
PF3D7_0310300	PF3D7_0310300.1	N/A	Plasmodium falciparum 3D7	Pf3D7_03_v3:441,760..447,410(+)	phosphoglycerate mutase, putative	protein coding gene	cytoplasm;nucleus	intramolecular transferase activity, phosphotransferases;mRNA binding	N/A	N/A
PF3D7_0310400	PF3D7_0310400.1	PIESP1	Plasmodium falciparum 3D7	Pf3D7_03_v3:447,468..451,552(+)	parasite-infected erythrocyte surface protein	protein coding gene	cell surface;host cell plasma membrane;nucleus;tubovesicular membrane network	N/A	N/A	PF02434
PF3D7_0310500	PF3D7_0310500.1	DHX57	Plasmodium falciparum 3D7	Pf3D7_03_v3:451,792..459,726(-)	ATP-dependent RNA helicase DHX57, putative	protein coding gene	nucleolus;nucleus	RNA binding;helicase activity	maturation of SSU-rRNA from tricistronic rRNA transcript (SSU-rRNA, 5.8S rRNA, LSU-rRNA)	PF00270;PF00271
PF3D7_0310600	PF3D7_0310600.1	EIF3K	Plasmodium falciparum 3D7	Pf3D7_03_v3:460,848..462,532(-)	eukaryotic translation initiation factor 3 subunit K, putative	protein coding gene	eukaryotic translation initiation factor 3 complex	N/A	N/A	PF10075
PF3D7_0310700	PF3D7_0310700.1	TRAPPC4	Plasmodium falciparum 3D7	Pf3D7_03_v3:462,750..464,274(+)	trafficking protein particle complex subunit 4, putative	protein coding gene	Maurer's cleft;TRAPP complex	N/A	endoplasmic reticulum to Golgi vesicle-mediated transport	PF04099
PF3D7_0310800	PF3D7_0310800.1	N/A	Plasmodium falciparum 3D7	Pf3D7_03_v3:464,662..465,196(+)	conserved Plasmodium protein, unknown function	protein coding gene	N/A	N/A	N/A	N/A
PF3D7_0310900	PF3D7_0310900.1	N/A	Plasmodium falciparum 3D7	Pf3D7_03_v3:465,745..468,557(+)	conserved Plasmodium protein, unknown function	protein coding gene	nucleus	N/A	N/A	N/A
PF3D7_0311000	PF3D7_0311000.1	N/A	Plasmodium falciparum 3D7	Pf3D7_03_v3:469,287..470,118(+)	conserved Plasmodium protein, unknown function	protein coding gene	N/A	N/A	N/A	N/A
PF3D7_0311100	PF3D7_0311100.1	N/A	Plasmodium falciparum 3D7	Pf3D7_03_v3:470,535..473,737(-)	pre-mRNA splicing factor, putative	protein coding gene	nucleus	N/A	N/A	PF01480
PF3D7_0311200	PF3D7_0311200.1	N/A	Plasmodium falciparum 3D7	Pf3D7_03_v3:473,860..479,395(+)	valine--tRNA ligase, putative	protein coding gene	apicoplast;cytosol	valine-tRNA ligase activity	tRNA aminoacylation for protein translation;valyl-tRNA aminoacylation	PF00133;PF08264
PF3D7_0311300	PF3D7_0311300.1	N/A	Plasmodium falciparum 3D7	Pf3D7_03_v3:479,460..485,830(-)	phosphatidylinositol 3- and 4-kinase, putative	protein coding gene	nucleus	N/A	N/A	PF00454
PF3D7_0311400	PF3D7_0311400.1	PKRP	Plasmodium falciparum 3D7	Pf3D7_03_v3:487,853..496,510(+)	kinase-related protein PKRP, putative	protein coding gene	centrosome;cytoplasm;extracellular vesicle;nucleus;spindle pole	protein serine/threonine kinase activity	mitotic cell cycle;protein phosphorylation;regulation of cytokinesis	PF00069
PF3D7_0311500	PF3D7_0311500.1	N/A	Plasmodium falciparum 3D7	Pf3D7_03_v3:496,787..498,268(-)	conserved protein, unknown function	protein coding gene	N/A	N/A	N/A	N/A
PF3D7_0311600	PF3D7_0311600.1	OST1	Plasmodium falciparum 3D7	Pf3D7_03_v3:499,117..502,677(+)	dolichyl-diphosphooligosaccharide--protein glycosyltransferase subunit OST1, putative	protein coding gene	apicoplast;oligosaccharyltransferase complex	N/A	protein N-linked glycosylation via asparagine;protein glycosylation	PF04597
PF3D7_0311700	PF3D7_0311700.1	PM6	Plasmodium falciparum 3D7	Pf3D7_03_v3:502,698..505,935(+)	plasmepsin VI	protein coding gene	osmiophilic body	aspartic-type endopeptidase activity	proteolysis	PF00026
PF3D7_0311800	PF3D7_0311800.1	N/A	Plasmodium falciparum 3D7	Pf3D7_03_v3:506,275..509,040(+)	ATP synthase F0 subunit d-like protein, putative	protein coding gene	mitochondrion;nucleus	N/A	N/A	N/A
PF3D7_0311900	PF3D7_0311900.1	N/A	Plasmodium falciparum 3D7	Pf3D7_03_v3:509,155..512,024(-)	heptatricopeptide repeat-containing protein, putative	protein coding gene	N/A	N/A	N/A	N/A
PF3D7_0312000	PF3D7_0312000.1	N/A	Plasmodium falciparum 3D7	Pf3D7_03_v3:511,923..513,009(+)	conserved protein, unknown function	protein coding gene	N/A	N/A	N/A	N/A
PF3D7_0312100	PF3D7_0312100.1	N/A	Plasmodium falciparum 3D7	Pf3D7_03_v3:513,105..516,915(+)	E3 ubiquitin-protein ligase	protein coding gene	apicoplast	ubiquitin-protein transferase activity	N/A	PF13639
PF3D7_0312200	PF3D7_0312200.1	N/A	Plasmodium falciparum 3D7	Pf3D7_03_v3:516,480..520,555(-)	tetratricopeptide repeat protein, putative	protein coding gene	TRC complex;cytosol;membrane	molecular adaptor activity	positive regulation of chaperone-mediated protein folding;posttranslational protein targeting to endoplasmic reticulum membrane;ubiquitin-dependent ERAD pathway	PF13414
PF3D7_0312300	PF3D7_0312300.1	RPN12	Plasmodium falciparum 3D7	Pf3D7_03_v3:521,939..523,113(+)	26S proteasome regulatory subunit RPN12, putative	protein coding gene	cytosol;intracellular;nucleus;proteasome regulatory particle;proteasome regulatory particle, lid subcomplex	N/A	proteasome-mediated ubiquitin-dependent protein catabolic process;ubiquitin-dependent protein catabolic process	PF10075
PF3D7_0312400	PF3D7_0312400.1	GSK3	Plasmodium falciparum 3D7	Pf3D7_03_v3:523,023..528,087(-)	glycogen synthase kinase 3	protein coding gene	Maurer's cleft;cytoplasm	protein serine/threonine kinase activity	response to xenobiotic stimulus;signal transduction	PF00069
PF3D7_0312500	PF3D7_0312500.1	MFR3	Plasmodium falciparum 3D7	Pf3D7_03_v3:528,316..531,025(+)	multidrug-resistant modulator MFR3	protein coding gene	integral component of membrane;mitochondrion;plasma membrane	N/A	response to xenobiotic stimulus	PF07690
PF3D7_0312800	PF3D7_0312800.1	N/A	Plasmodium falciparum 3D7	Pf3D7_03_v3:533,606..535,480(+)	60S ribosomal protein L26, putative	protein coding gene	cytosolic large ribosomal subunit;nucleus	RNA binding;structural constituent of ribosome	cytoplasmic translation;ribosomal large subunit biogenesis;translation	PF00467;PF16906
PF3D7_0312900	PF3D7_0312900.1	N/A	Plasmodium falciparum 3D7	Pf3D7_03_v3:535,938..537,274(+)	hypothetical protein	protein coding gene	N/A	N/A	N/A	N/A
PF3D7_0313000	PF3D7_0313000.1	N/A	Plasmodium falciparum 3D7	Pf3D7_03_v3:537,355..538,827(-)	conserved Plasmodium protein, unknown function	protein coding gene	N/A	N/A	N/A	N/A
PF3D7_0313100	PF3D7_0313100.1	HRD3	Plasmodium falciparum 3D7	Pf3D7_03_v3:539,192..543,133(+)	ubiquitin-protein ligase, putative	protein coding gene	Hrd1p ubiquitin ligase ERAD-L complex	N/A	ubiquitin-dependent ERAD pathway	PF08238
PF3D7_0313200	PF3D7_0313200.1	N/A	Plasmodium falciparum 3D7	Pf3D7_03_v3:543,010..543,942(-)	conserved protein, unknown function	protein coding gene	apicoplast;cell surface	N/A	N/A	N/A
PF3D7_0313300	PF3D7_0313300.1	N/A	Plasmodium falciparum 3D7	Pf3D7_03_v3:544,055..545,227(-)	YGGT family protein, putative	protein coding gene	apicoplast;membrane	N/A	N/A	PF02325
PF3D7_0313400	PF3D7_0313400.1	N/A	Plasmodium falciparum 3D7	Pf3D7_03_v3:545,589..548,500(-)	conserved Plasmodium protein, unknown function	protein coding gene	N/A	N/A	N/A	N/A
PF3D7_0313500	PF3D7_0313500.1	PfG	Plasmodium falciparum 3D7	Pf3D7_03_v3:548,576..551,854(+)	Ras-like G protein	protein coding gene	Maurer's cleft;cytosol	GTPase activity	N/A	PF01926;PF14714
PF3D7_0313600	PF3D7_0313600.1	N/A	Plasmodium falciparum 3D7	Pf3D7_03_v3:551,348..554,770(-)	conserved Plasmodium protein, unknown function	protein coding gene	N/A	N/A	N/A	N/A
PF3D7_0313700	PF3D7_0313700.1	N/A	Plasmodium falciparum 3D7	Pf3D7_03_v3:555,035..558,825(-)	conserved Plasmodium protein, unknown function	protein coding gene	apicoplast	N/A	N/A	N/A
PF3D7_0313800	PF3D7_0313800.1	N/A	Plasmodium falciparum 3D7	Pf3D7_03_v3:559,025..563,280(+)	conserved Plasmodium protein, unknown function	protein coding gene	apicoplast	N/A	N/A	N/A
PF3D7_0313900	PF3D7_0313900.1	N/A	Plasmodium falciparum 3D7	Pf3D7_03_v3:562,366..565,656(-)	conserved Plasmodium protein, unknown function	protein coding gene	apicoplast	N/A	N/A	N/A
PF3D7_0314000	PF3D7_0314000.1	N/A	Plasmodium falciparum 3D7	Pf3D7_03_v3:567,002..569,084(+)	HSP20-like chaperone, putative	protein coding gene	cytoplasm;cytosol;nucleus	Hsp90 protein binding;chaperone binding	chaperone-mediated protein complex assembly;negative regulation of ATP-dependent activity;protein folding	N/A
PF3D7_0314100	PF3D7_0314100.1	N/A	Plasmodium falciparum 3D7	Pf3D7_03_v3:568,936..571,598(-)	vesicle transport v-SNARE protein, putative	protein coding gene	ER to Golgi transport vesicle membrane;Golgi apparatus;SNARE complex;endoplasmic reticulum membrane;late endosome membrane	SNAP receptor activity;SNARE binding	Golgi to vacuole transport;endoplasmic reticulum to Golgi vesicle-mediated transport;intra-Golgi vesicle-mediated transport;protein targeting to vacuole;retrograde transport, endosome to Golgi;vesicle fusion with Golgi apparatus	PF05008
PF3D7_0314100	PF3D7_0314100.2	N/A	Plasmodium falciparum 3D7	Pf3D7_03_v3:568,936..571,598(-)	vesicle transport v-SNARE protein, putative	protein coding gene	N/A	N/A	N/A	N/A
PF3D7_0314200	PF3D7_0314200.1	N/A	Plasmodium falciparum 3D7	Pf3D7_03_v3:572,134..576,853(-)	conserved Plasmodium protein, unknown function	protein coding gene	N/A	N/A	N/A	N/A
PF3D7_0314300	PF3D7_0314300.1	DER1-2	Plasmodium falciparum 3D7	Pf3D7_03_v3:576,881..578,724(-)	DER1-like protein	protein coding gene	Hrd1p ubiquitin ligase ERAD-L complex;apicoplast;integral component of endoplasmic reticulum membrane;integral component of membrane	ATP hydrolysis activity;misfolded protein binding;ubiquitin-specific protease binding	endoplasmic reticulum unfolded protein response;regulation of cell cycle process;ubiquitin-dependent ERAD pathway	PF04511
PF3D7_0314400	PF3D7_0314400.1	PPP6	Plasmodium falciparum 3D7	Pf3D7_03_v3:578,813..581,393(-)	serine/threonine protein phosphatase 6, putative	protein coding gene	cytoplasm;nucleus	protein serine/threonine phosphatase activity	protein dephosphorylation	PF00149
PF3D7_0314500	PF3D7_0314500.1	N/A	Plasmodium falciparum 3D7	Pf3D7_03_v3:582,177..586,023(+)	conserved Plasmodium protein, unknown function	protein coding gene	N/A	N/A	N/A	N/A
PF3D7_0314600	PF3D7_0314600.1	N/A	Plasmodium falciparum 3D7	Pf3D7_03_v3:586,077..588,321(+)	conserved protein, unknown function	protein coding gene	N/A	N/A	N/A	N/A
PF3D7_0314700	PF3D7_0314700.1	RNF1	Plasmodium falciparum 3D7	Pf3D7_03_v3:588,362..594,166(-)	RING finger protein RNF1	protein coding gene	cytoplasm;nucleus	histone binding;ubiquitin protein ligase activity	ubiquitin-dependent protein catabolic process	PF13639
PF3D7_0314800	PF3D7_0314800.1	N/A	Plasmodium falciparum 3D7	Pf3D7_03_v3:604,442..608,381(+)	conserved Plasmodium protein, unknown function	protein coding gene	N/A	N/A	N/A	N/A
PF3D7_0314900	PF3D7_0314900.1	N/A	Plasmodium falciparum 3D7	Pf3D7_03_v3:608,592..610,992(+)	conserved Plasmodium membrane protein, unknown function	protein coding gene	N/A	N/A	N/A	N/A
PF3D7_0315000	PF3D7_0315000.1	N/A	Plasmodium falciparum 3D7	Pf3D7_03_v3:610,994..612,107(+)	zinc finger protein, putative	protein coding gene	N/A	zinc ion binding	N/A	PF04434
PF3D7_0315100	PF3D7_0315100.1	eIF4E	Plasmodium falciparum 3D7	Pf3D7_03_v3:612,333..614,159(-)	eukaryotic translation initiation factor 4E	protein coding gene	P granule;eukaryotic translation initiation factor 4F complex;nucleus	RNA 7-methylguanosine cap binding;RNA cap binding;protein binding;translation initiation factor activity	translational initiation	PF01652
PF3D7_0315200	PF3D7_0315200.1	CTRP	Plasmodium falciparum 3D7	Pf3D7_03_v3:616,472..622,816(+)	circumsporozoite- and TRAP-related protein	protein coding gene	microneme	GPI anchor binding;heparan sulfate proteoglycan binding	B cell activation involved in immune response;cell-cell adhesion;entry into host	PF00090;PF00092
PF3D7_0315300	PF3D7_0315300.1	N/A	Plasmodium falciparum 3D7	Pf3D7_03_v3:623,446..630,360(+)	conserved Plasmodium protein, unknown function	protein coding gene	N/A	N/A	N/A	N/A
PF3D7_0315400	PF3D7_0315400.1	N/A	Plasmodium falciparum 3D7	Pf3D7_03_v3:630,342..631,821(-)	conserved Plasmodium protein, unknown function	protein coding gene	apicoplast	N/A	N/A	N/A
PF3D7_0315500	PF3D7_0315500.1	N/A	Plasmodium falciparum 3D7	Pf3D7_03_v3:632,614..634,164(-)	ribosomal protein L47, mitochondrial, putative	protein coding gene	mitochondrial large ribosomal subunit;mitochondrion	structural constituent of ribosome	mitochondrial translation	PF06984
PF3D7_0315600	PF3D7_0315600.1	N/A	Plasmodium falciparum 3D7	Pf3D7_03_v3:635,060..638,072(+)	zinc finger protein, putative	protein coding gene	nucleus	N/A	N/A	N/A
PF3D7_0315700	PF3D7_0315700.1	N/A	Plasmodium falciparum 3D7	Pf3D7_03_v3:638,283..641,306(+)	conserved Plasmodium membrane protein, unknown function	protein coding gene	integral component of membrane	N/A	N/A	N/A
PF3D7_0315800	PF3D7_0315800.1	N/A	Plasmodium falciparum 3D7	Pf3D7_03_v3:641,255..643,023(-)	zinc finger protein, putative	protein coding gene	cytosol;nucleus	ubiquitin protein ligase activity	protein ubiquitination;regulation of cell adhesion	N/A
PF3D7_0315900	PF3D7_0315900.1	N/A	Plasmodium falciparum 3D7	Pf3D7_03_v3:644,186..645,268(+)	conserved Plasmodium protein, unknown function	protein coding gene	N/A	N/A	N/A	N/A
PF3D7_0316000	PF3D7_0316000.1	MA	Plasmodium falciparum 3D7	Pf3D7_03_v3:645,489..647,748(-)	microneme associated antigen	protein coding gene	cell surface;microneme;mitochondrion	host cell surface binding	cell-cell adhesion;entry into host	N/A
PF3D7_0316100	PF3D7_0316100.1	N/A	Plasmodium falciparum 3D7	Pf3D7_03_v3:647,361..649,671(+)	ribosomal protein L27, mitochondrial, putative	protein coding gene	mitochondrial large ribosomal subunit;mitochondrion	structural constituent of ribosome	N/A	PF01016
PF3D7_0316200	PF3D7_0316200.1	N/A	Plasmodium falciparum 3D7	Pf3D7_03_v3:649,743..657,416(-)	conserved Plasmodium protein, unknown function	protein coding gene	N/A	N/A	N/A	N/A
PF3D7_0316300	PF3D7_0316300.1	PPase	Plasmodium falciparum 3D7	Pf3D7_03_v3:658,272..661,980(+)	inorganic pyrophosphatase	protein coding gene	apicoplast;cytosol	inorganic diphosphatase activity;magnesium ion binding	diphosphate metabolic process;phosphate-containing compound metabolic process	PF00719
PF3D7_0316300	PF3D7_0316300.2	PPase	Plasmodium falciparum 3D7	Pf3D7_03_v3:658,272..661,980(+)	inorganic pyrophosphatase, putative	protein coding gene	cytosol	inorganic diphosphatase activity;magnesium ion binding;pyrophosphatase activity	phosphate-containing compound metabolic process	PF00719
PF3D7_0316400	PF3D7_0316400.1	N/A	Plasmodium falciparum 3D7	Pf3D7_03_v3:662,081..665,690(-)	CS domain-containing protein, putative	protein coding gene	apicoplast;nucleus	N/A	N/A	N/A
PF3D7_0316500	PF3D7_0316500.1	NUF2	Plasmodium falciparum 3D7	Pf3D7_03_v3:665,769..669,165(+)	kinetochore protein NUF2, putative	protein coding gene	Ndc80 complex;chromosome, centromeric region;condensed nuclear chromosome kinetochore;nucleus	protein-containing complex binding	attachment of mitotic spindle microtubules to kinetochore;chromosome segregation;kinetochore organization;meiotic chromosome segregation;mitotic spindle organization	PF03800
PF3D7_0316600	PF3D7_0316600.1	FNT	Plasmodium falciparum 3D7	Pf3D7_03_v3:668,469..672,475(-)	formate-nitrite transporter	protein coding gene	cell surface;integral component of plasma membrane	high-affinity secondary active nitrite transmembrane transporter activity;lactate:proton symporter activity	acetate transport;formate transport;lactate transmembrane transport;nitrite transport;pyruvate transport;response to xenobiotic stimulus	PF01226
PF3D7_0316700	PF3D7_0316700.1	YOP1	Plasmodium falciparum 3D7	Pf3D7_03_v3:673,290..676,084(+)	protein YOP1, putative	protein coding gene	cell surface;endoplasmic reticulum;nucleus	N/A	endoplasmic reticulum organization;endoplasmic reticulum tubular network organization	PF03134
PF3D7_0316800	PF3D7_0316800.1	N/A	Plasmodium falciparum 3D7	Pf3D7_03_v3:676,699..679,176(+)	40S ribosomal protein S15A, putative	protein coding gene	cytosolic small ribosomal subunit;nucleus	RNA binding;structural constituent of ribosome	translation	PF00410
PF3D7_0316900	PF3D7_0316900.1	N/A	Plasmodium falciparum 3D7	Pf3D7_03_v3:678,813..681,861(-)	E3 ubiquitin-protein ligase, putative	protein coding gene	apicoplast;cytoplasm	ubiquitin protein ligase activity;ubiquitin-protein transferase activity;zinc ion binding	protein ubiquitination	PF13920
PF3D7_0317000	PF3D7_0317000.1	N/A	Plasmodium falciparum 3D7	Pf3D7_03_v3:682,236..684,432(-)	proteasome subunit alpha type-3, putative	protein coding gene	cytoplasm;nucleus;proteasome core complex;proteasome core complex, alpha-subunit complex	endopeptidase activity	proteasomal protein catabolic process;proteasomal ubiquitin-independent protein catabolic process;proteasome-mediated ubiquitin-dependent protein catabolic process;ubiquitin-dependent protein catabolic process	PF00227;PF10584
PF3D7_0317100	PF3D7_0317100.1	B9	Plasmodium falciparum 3D7	Pf3D7_03_v3:686,282..689,482(+)	6-cysteine protein	protein coding gene	plasma membrane	N/A	N/A	N/A
PF3D7_0317200	PF3D7_0317200.1	CRK4	Plasmodium falciparum 3D7	Pf3D7_03_v3:689,618..696,787(-)	cdc2-related protein kinase 4	protein coding gene	cytosol;nucleus;protein kinase CK2 complex	protein kinase activity;protein serine/threonine kinase activity	DNA replication;mitotic cell cycle;peptidyl-serine phosphorylation;peptidyl-threonine phosphorylation;protein phosphorylation;regulation of cell cycle	PF00069
PF3D7_0317300	PF3D7_0317300.1	N/A	Plasmodium falciparum 3D7	Pf3D7_03_v3:698,789..710,430(-)	conserved Plasmodium protein, unknown function	protein coding gene	cytoplasm;endoplasmic reticulum membrane;membrane;nucleus	DNA-binding transcription factor activity;protein binding;sequence-specific DNA binding	positive regulation of transcription, DNA-templated;protein autoprocessing	N/A
PF3D7_0317400	PF3D7_0317400.1	N/A	Plasmodium falciparum 3D7	Pf3D7_03_v3:711,998..714,150(-)	DNA replication complex GINS protein, putative	protein coding gene	GINS complex;replication fork protection complex	N/A	double-strand break repair via break-induced replication	PF05916
PF3D7_0317500	PF3D7_0317500.1	EG5	Plasmodium falciparum 3D7	Pf3D7_03_v3:716,493..722,640(-)	kinesin-5	protein coding gene	kinesin complex;nucleus	ATP hydrolysis activity;microtubule binding;microtubule motor activity;plus-end-directed microtubule motor activity	microtubule-based movement;response to xenobiotic stimulus	PF00225
PF3D7_0317600	PF3D7_0317600.1	RPS11	Plasmodium falciparum 3D7	Pf3D7_03_v3:724,394..726,450(+)	40S ribosomal protein S11, putative	protein coding gene	cytosolic small ribosomal subunit;extracellular vesicle;nucleus	structural constituent of ribosome	translation	PF00366;PF16205
PF3D7_0317700	PF3D7_0317700.1	N/A	Plasmodium falciparum 3D7	Pf3D7_03_v3:727,544..738,158(+)	CPSF (cleavage and polyadenylation specific factor), subunit A, putative	protein coding gene	cullin-RING ubiquitin ligase complex;nucleus	damaged DNA binding	nucleotide-excision repair;proteasome-mediated ubiquitin-dependent protein catabolic process	PF03178
PF3D7_0317800	PF3D7_0317800.1	N/A	Plasmodium falciparum 3D7	Pf3D7_03_v3:737,151..739,019(-)	26S proteasome non-ATPase regulatory subunit 9, putative	protein coding gene	cytoplasm;nucleus;proteasome regulatory particle	N/A	proteasome regulatory particle assembly;ubiquitin-dependent protein catabolic process	PF18265
PF3D7_0317900	PF3D7_0317900.1	N/A	Plasmodium falciparum 3D7	Pf3D7_03_v3:739,193..742,054(+)	conserved protein, unknown function	protein coding gene	mitochondrion	N/A	N/A	N/A
PF3D7_0318000	PF3D7_0318000.1	N/A	Plasmodium falciparum 3D7	Pf3D7_03_v3:742,191..742,799(+)	conserved Plasmodium protein, unknown function	protein coding gene	N/A	N/A	N/A	N/A
PF3D7_0318100	PF3D7_0318100.1	STOML	Plasmodium falciparum 3D7	Pf3D7_03_v3:743,870..745,191(+)	stomatin-like protein, putative	protein coding gene	mitochondrion;nucleus	N/A	N/A	PF01145;PF16200
PF3D7_0318200	PF3D7_0318200.1	RPB1	Plasmodium falciparum 3D7	Pf3D7_03_v3:747,275..756,485(+)	DNA-directed RNA polymerase II subunit RPB1	protein coding gene	RNA polymerase II, core complex;nucleus	DNA-directed 5'-3' RNA polymerase activity;protein binding	transcription by RNA polymerase II	PF00623;PF04983;PF04990;PF04992;PF04997;PF04998;PF05000;PF05001
PF3D7_0318300	PF3D7_0318300.1	N/A	Plasmodium falciparum 3D7	Pf3D7_03_v3:756,194..760,677(-)	conserved Plasmodium protein, unknown function	protein coding gene	N/A	N/A	N/A	N/A
PF3D7_0318400	PF3D7_0318400.1	N/A	Plasmodium falciparum 3D7	Pf3D7_03_v3:761,693..765,439(-)	coiled-coil domain-containing protein CCDC148/CCDC112, putative	protein coding gene	N/A	N/A	N/A	N/A
PF3D7_0318500	PF3D7_0318500.1	N/A	Plasmodium falciparum 3D7	Pf3D7_03_v3:766,814..782,795(+)	conserved Plasmodium protein, unknown function	protein coding gene	N/A	N/A	N/A	N/A
PF3D7_0318600	PF3D7_0318600.1	N/A	Plasmodium falciparum 3D7	Pf3D7_03_v3:782,940..787,364(-)	cleavage and polyadenylation specificity factor, putative	protein coding gene	mRNA cleavage and polyadenylation specificity factor complex;nucleus	mRNA binding	mRNA cleavage;mRNA polyadenylation;snRNA processing	PF07521;PF10996;PF16661
PF3D7_0318700	PF3D7_0318700.1	N/A	Plasmodium falciparum 3D7	Pf3D7_03_v3:788,145..789,211(+)	conserved Plasmodium protein, unknown function	protein coding gene	N/A	N/A	N/A	N/A
PF3D7_0318800	PF3D7_0318800.1	N/A	Plasmodium falciparum 3D7	Pf3D7_03_v3:789,497..791,504(+)	triosephosphate isomerase, putative	protein coding gene	apicoplast;cytosol	triose-phosphate isomerase activity	gluconeogenesis;glyceraldehyde-3-phosphate biosynthetic process;glycerol catabolic process;glycolytic process	PF00121
PF3D7_0318900	PF3D7_0318900.1	N/A	Plasmodium falciparum 3D7	Pf3D7_03_v3:791,312..794,096(-)	conserved protein, unknown function	protein coding gene	endoplasmic reticulum	RNA binding;calcium ion binding	N/A	PF07946
PF3D7_0319000	PF3D7_0319000.1	ATPase7	Plasmodium falciparum 3D7	Pf3D7_03_v3:794,521..801,871(+)	P4-type ATPase ATP7, putative	protein coding gene	cytoplasm;integral component of plasma membrane;plasma membrane	ATPase-coupled intramembrane lipid transporter activity;P-type ion transporter activity;phosphatidylcholine flippase activity	cation transport;phospholipid translocation	PF13246;PF16209;PF16212
PF3D7_0319100	PF3D7_0319100.1	RBX1	Plasmodium falciparum 3D7	Pf3D7_03_v3:801,493..803,378(-)	E3 ubiquitin-protein ligase RBX1, putative	protein coding gene	cullin-RING ubiquitin ligase complex;nucleus;ubiquitin ligase complex	cullin family protein binding;ubiquitin protein ligase activity;ubiquitin-protein transferase activity	protein ubiquitination;ubiquitin-dependent protein catabolic process	PF12678
PF3D7_0319200	PF3D7_0319200.1	CCR4-4	Plasmodium falciparum 3D7	Pf3D7_03_v3:803,517..806,736(-)	CCR4 domain-containing protein 4, putative	protein coding gene	apicoplast;nucleus	3'-5'-exoribonuclease activity;nuclease activity	N/A	PF03372
PF3D7_0319300	PF3D7_0319300.1	N/A	Plasmodium falciparum 3D7	Pf3D7_03_v3:806,843..808,202(+)	ubiquitin-conjugating enzyme E2, putative	protein coding gene	N/A	ubiquitin conjugating enzyme activity;ubiquitin-protein transferase activity	DNA repair;histone ubiquitination;proteasome-mediated ubiquitin-dependent protein catabolic process;protein polyubiquitination	PF00179
PF3D7_0319400	PF3D7_0319400.1	N/A	Plasmodium falciparum 3D7	Pf3D7_03_v3:809,093..814,903(+)	kinesin-8X	protein coding gene	kinesin complex;microtubule;mitotic spindle;nucleus	ATP hydrolysis activity;microtubule binding;microtubule motor activity;plus-end-directed microtubule motor activity	microtubule depolymerization;microtubule-based movement	PF00225
PF3D7_0319500	PF3D7_0319500.1	N/A	Plasmodium falciparum 3D7	Pf3D7_03_v3:815,119..817,437(+)	RNA-binding protein, putative	protein coding gene	U2 snRNP;precatalytic spliceosome	RNA binding	mRNA splicing, via spliceosome	PF00076
PF3D7_0319600	PF3D7_0319600.1	EF-1delta	Plasmodium falciparum 3D7	Pf3D7_03_v3:817,542..819,496(+)	elongation factor 1-delta, putative	protein coding gene	cytosol;eukaryotic translation elongation factor 1 complex;nucleus	guanyl-nucleotide exchange factor activity;translation elongation factor activity	translational elongation	PF00736
PF3D7_0319700	PF3D7_0319700.1	ABCI3	Plasmodium falciparum 3D7	Pf3D7_03_v3:820,232..831,283(+)	ABC transporter I family member 1, putative	protein coding gene	integral component of membrane;intracellular membrane-bounded organelle;membrane	ATPase-coupled transmembrane transporter activity;lipid transporter activity	lipid transport;response to drug;response to xenobiotic stimulus	PF00005
PF3D7_0319800	PF3D7_0319800.1	N/A	Plasmodium falciparum 3D7	Pf3D7_03_v3:831,076..832,509(-)	conserved Plasmodium protein, unknown function	protein coding gene	N/A	N/A	N/A	N/A
PF3D7_0319900	PF3D7_0319900.1	N/A	Plasmodium falciparum 3D7	Pf3D7_03_v3:833,687..835,444(-)	conserved protein, unknown function	protein coding gene	N/A	N/A	N/A	N/A
PF3D7_0320000	PF3D7_0320000.1	I2	Plasmodium falciparum 3D7	Pf3D7_03_v3:837,189..838,557(+)	protein phosphatase inhibitor 2	protein coding gene	cytoplasm;nucleus	protein binding;protein phosphatase inhibitor activity;protein serine/threonine phosphatase inhibitor activity	regulation of phosphoprotein phosphatase activity	PF04979
PF3D7_0320100	PF3D7_0320100.1	SEC22	Plasmodium falciparum 3D7	Pf3D7_03_v3:839,576..842,017(+)	protein transport protein SEC22	protein coding gene	COPII-coated ER to Golgi transport vesicle;ER to Golgi transport vesicle membrane;Golgi apparatus;Golgi membrane;Maurer's cleft;SNARE complex;endoplasmic reticulum;endoplasmic reticulum membrane;endoplasmic reticulum-Golgi intermediate compartment	SNAP receptor activity	endoplasmic reticulum to Golgi vesicle-mediated transport;intracellular protein transport;retrograde vesicle-mediated transport, Golgi to endoplasmic reticulum;vesicle fusion with Golgi apparatus;vesicle-mediated transport	PF00957;PF13774
PF3D7_0320200	PF3D7_0320200.1	N/A	Plasmodium falciparum 3D7	Pf3D7_03_v3:842,496..844,477(+)	CPW-WPC family protein	protein coding gene	N/A	N/A	N/A	PF09717
PF3D7_0320300	PF3D7_0320300.1	CCT5	Plasmodium falciparum 3D7	Pf3D7_03_v3:844,881..848,142(+)	T-complex protein 1 subunit epsilon	protein coding gene	cell surface;chaperonin-containing T-complex;cytosol;nucleus	unfolded protein binding	protein folding	PF00118
PF3D7_0320400	PF3D7_0320400.1	Cap380	Plasmodium falciparum 3D7	Pf3D7_03_v3:848,247..857,504(-)	oocyst capsule protein Cap380	protein coding gene	cell surface	N/A	N/A	N/A
PF3D7_0320500	PF3D7_0320500.1	Nico	Plasmodium falciparum 3D7	Pf3D7_03_v3:860,221..862,776(+)	nicotinamidase, putative	protein coding gene	cytoplasm;nucleus	N/A	N/A	PF00857
PF3D7_0320600	PF3D7_0320600.1	N/A	Plasmodium falciparum 3D7	Pf3D7_03_v3:862,233..864,181(-)	conserved protein, unknown function	protein coding gene	N/A	N/A	N/A	N/A
PF3D7_0320700	PF3D7_0320700.1	SPC25	Plasmodium falciparum 3D7	Pf3D7_03_v3:864,860..866,969(+)	signal peptidase complex subunit 2	protein coding gene	endoplasmic reticulum;signal peptidase complex	endopeptidase activity;protein binding	protein targeting to ER;protein transport;signal peptide processing	PF06703
PF3D7_0320800	PF3D7_0320800.1	DOZI	Plasmodium falciparum 3D7	Pf3D7_03_v3:869,089..872,456(+)	ATP-dependent RNA helicase DDX6	protein coding gene	P-body;cytoplasm;cytoplasmic stress granule;nucleus	RNA helicase activity;mRNA binding;protein binding	P-body assembly;stress granule assembly	PF00270;PF00271
PF3D7_0320900	PF3D7_0320900.1	H2A.Z	Plasmodium falciparum 3D7	Pf3D7_03_v3:874,313..876,685(+)	histone H2A.Z	protein coding gene	chromatin;nucleosome;nucleus	DNA binding;RNA binding;chromatin binding	chromatin assembly or disassembly;chromatin organization;chromatin silencing	PF00125;PF16211
PF3D7_0321000	PF3D7_0321000.1	N/A	Plasmodium falciparum 3D7	Pf3D7_03_v3:877,409..879,789(+)	conserved protein, unknown function	protein coding gene	apicoplast	N/A	N/A	N/A
PF3D7_0321100	PF3D7_0321100.1	N/A	Plasmodium falciparum 3D7	Pf3D7_03_v3:879,438..885,952(-)	conserved Plasmodium protein, unknown function	protein coding gene	N/A	N/A	N/A	N/A
PF3D7_0321200	PF3D7_0321200.1	ALG7	Plasmodium falciparum 3D7	Pf3D7_03_v3:886,593..889,386(-)	UDP-N-acetylglucosamine--dolichyl-phosphate N-acetylglucosaminephosphotransferase, putative	protein coding gene	UDP-N-acetylglucosamine transferase complex;integral component of membrane	UDP-N-acetylglucosamine-dolichyl-phosphate N-acetylglucosaminephosphotransferase activity	dolichol-linked oligosaccharide biosynthetic process;dolichyl diphosphate biosynthetic process;protein N-linked glycosylation	PF00953
PF3D7_0321300	PF3D7_0321300.1	N/A	Plasmodium falciparum 3D7	Pf3D7_03_v3:889,611..893,080(-)	conserved Plasmodium protein, unknown function	protein coding gene	N/A	N/A	N/A	N/A
PF3D7_0321400	PF3D7_0321400.1	pPK1	Plasmodium falciparum 3D7	Pf3D7_03_v3:894,149..896,220(+)	pseudo protein kinase 1, putative	protein coding gene	nuclear periphery;nucleus	protein kinase activity	protein phosphorylation	PF00069
PF3D7_0321500	PF3D7_0321500.1	N/A	Plasmodium falciparum 3D7	Pf3D7_03_v3:896,241..900,388(-)	peptidase, putative	protein coding gene	nucleus	peptidase activity;serine-type endopeptidase activity	N/A	PF00326
PF3D7_0321600	PF3D7_0321600.1	DDX42	Plasmodium falciparum 3D7	Pf3D7_03_v3:900,508..903,759(+)	ATP-dependent RNA helicase DDX42, putative	protein coding gene	cytoplasm;nucleus;ribonucleoprotein complex	RNA binding;RNA helicase activity	N/A	PF00270;PF00271
PF3D7_0321700	PF3D7_0321700.1	N/A	Plasmodium falciparum 3D7	Pf3D7_03_v3:903,127..910,678(-)	conserved Plasmodium protein, unknown function	protein coding gene	N/A	N/A	N/A	N/A
PF3D7_0321800	PF3D7_0321800.1	N/A	Plasmodium falciparum 3D7	Pf3D7_03_v3:912,017..921,435(+)	WD repeat-containing protein, putative	protein coding gene	nucleus;precatalytic spliceosome	N/A	RNA splicing	N/A
PF3D7_0321900	PF3D7_0321900.1	CARL	Plasmodium falciparum 3D7	Pf3D7_03_v3:921,776..928,618(+)	cyclic amine resistance locus protein	protein coding gene	cis-Golgi network;endoplasmic reticulum;integral component of endoplasmic reticulum membrane	N/A	maintenance of protein localization in endoplasmic reticulum;response to drug;response to xenobiotic stimulus	PF05346
PF3D7_0322000	PF3D7_0322000.1	CYP19A	Plasmodium falciparum 3D7	Pf3D7_03_v3:928,124..929,640(-)	peptidyl-prolyl cis-trans isomerase	protein coding gene	Maurer's cleft;cytoplasm;cytosol;mitochondrion;nucleus	cyclosporin A binding;peptidyl-prolyl cis-trans isomerase activity	protein folding;protein peptidyl-prolyl isomerization	PF00160
PF3D7_0322100	PF3D7_0322100.1	Prt1	Plasmodium falciparum 3D7	Pf3D7_03_v3:930,302..933,014(-)	mRNA-capping enzyme subunit beta	protein coding gene	N/A	ATP hydrolysis activity	N/A	N/A
PF3D7_0322200	PF3D7_0322200.1	N/A	Plasmodium falciparum 3D7	Pf3D7_03_v3:933,188..937,006(-)	conserved protein, unknown function	protein coding gene	apical complex	N/A	N/A	N/A
PF3D7_0322300	PF3D7_0322300.1	DGAT	Plasmodium falciparum 3D7	Pf3D7_03_v3:937,293..941,851(-)	diacylglycerol O-acyltransferase	protein coding gene	endoplasmic reticulum;endoplasmic reticulum membrane	O-acyltransferase activity;diacylglycerol O-acyltransferase activity	triglyceride biosynthetic process	PF03062
PF3D7_0322400	PF3D7_0322400.1	N/A	Plasmodium falciparum 3D7	Pf3D7_03_v3:942,090..945,625(+)	regulator of initiation factor 2 (eIF2)	protein coding gene	cytoplasm	N/A	N/A	PF07065
PF3D7_0322500	PF3D7_0322500.1	IscA2	Plasmodium falciparum 3D7	Pf3D7_03_v3:945,333..946,889(-)	iron-sulfur assembly protein, putative	protein coding gene	cytoplasm;mitochondrion	2 iron, 2 sulfur cluster binding	iron-sulfur cluster assembly;protein maturation by iron-sulfur cluster transfer	N/A
PF3D7_0322600	PF3D7_0322600.1	N/A	Plasmodium falciparum 3D7	Pf3D7_03_v3:948,374..952,693(+)	conserved Plasmodium protein, unknown function	protein coding gene	N/A	N/A	endocytosis;endosomal transport	N/A
PF3D7_0322700	PF3D7_0322700.1	N/A	Plasmodium falciparum 3D7	Pf3D7_03_v3:952,746..963,144(-)	conserved Plasmodium protein, unknown function	protein coding gene	N/A	N/A	N/A	N/A
PF3D7_0322800	PF3D7_0322800.1	N/A	Plasmodium falciparum 3D7	Pf3D7_03_v3:964,101..965,203(+)	conserved Plasmodium protein, unknown function	protein coding gene	N/A	N/A	N/A	N/A
PF3D7_0322900	PF3D7_0322900.1	RPS3A	Plasmodium falciparum 3D7	Pf3D7_03_v3:965,293..967,150(-)	40S ribosomal protein S3A, putative	protein coding gene	cytosol;cytosolic small ribosomal subunit;extracellular vesicle;nucleus	RNA binding;structural constituent of ribosome	translation	PF01015
PF3D7_0323000	PF3D7_0323000.1	TMA7	Plasmodium falciparum 3D7	Pf3D7_03_v3:968,067..969,942(-)	translation machinery-associated protein 7, putative	protein coding gene	nucleus	N/A	N/A	PF09072
PF3D7_0323100	PF3D7_0323100.1	N/A	Plasmodium falciparum 3D7	Pf3D7_03_v3:969,875..976,203(+)	conserved Plasmodium protein, unknown function	protein coding gene	endoplasmic reticulum membrane	GTPase activator activity	endoplasmic reticulum to Golgi vesicle-mediated transport	N/A
PF3D7_0323200	PF3D7_0323200.1	N/A	Plasmodium falciparum 3D7	Pf3D7_03_v3:976,846..978,520(+)	conserved Plasmodium protein, unknown function	protein coding gene	N/A	N/A	N/A	N/A
PF3D7_0323300	PF3D7_0323300.1	N/A	Plasmodium falciparum 3D7	Pf3D7_03_v3:978,970..980,271(+)	conserved protein, unknown function	protein coding gene	N/A	N/A	N/A	PF10561
PF3D7_0323400	PF3D7_0323400.1	RIPR	Plasmodium falciparum 3D7	Pf3D7_03_v3:980,289..984,435(-)	Rh5 interacting protein	protein coding gene	host cell membrane;host extracellular space;membrane;microneme;microneme lumen;protein-containing complex	host cell surface binding;protein binding	entry into host;protein insertion into membrane	N/A
PF3D7_0323500	PF3D7_0323500.1	SMN	Plasmodium falciparum 3D7	Pf3D7_03_v3:985,953..988,161(+)	survival motor neuron-like protein	protein coding gene	nucleus;spliceosomal complex	RNA binding;nuclease activity	N/A	N/A
PF3D7_0323600	PF3D7_0323600.1	N/A	Plasmodium falciparum 3D7	Pf3D7_03_v3:988,165..991,120(+)	BSD domain-containing protein, putative	protein coding gene	cytoplasm	N/A	N/A	N/A
PF3D7_0323700	PF3D7_0323700.1	SART1	Plasmodium falciparum 3D7	Pf3D7_03_v3:991,037..994,381(-)	U4/U6.U5 tri-snRNP-associated protein 1, putative	protein coding gene	U4/U6 x U5 tri-snRNP complex;nucleus	N/A	mRNA cis splicing, via spliceosome;maturation of 5S rRNA	PF03343
PF3D7_0323800	PF3D7_0323800.1	N/A	Plasmodium falciparum 3D7	Pf3D7_03_v3:995,923..1,001,997(+)	conserved Plasmodium protein, unknown function	protein coding gene	nucleus	mRNA binding	N/A	N/A
PF3D7_0324000	PF3D7_0324000.1	EPF1	Plasmodium falciparum 3D7	Pf3D7_03_v3:1,005,952..1,006,800(+)	exported protein family 1	protein coding gene	Maurer's cleft	N/A	N/A	PF14308
PF3D7_0324100	PF3D7_0324100.1	MC-2TM	Plasmodium falciparum 3D7	Pf3D7_03_v3:1,007,145..1,008,491(-)	Pfmc-2TM Maurer's cleft two transmembrane protein	protein coding gene	Maurer's cleft;integral component of membrane	N/A	translocation of peptides or proteins into host	N/A
PF3D7_0324200	PF3D7_0324200.1	EPF3	Plasmodium falciparum 3D7	Pf3D7_03_v3:1,010,342..1,011,621(-)	exported protein family 3	protein coding gene	Maurer's cleft;host cell cytoplasm	N/A	N/A	PF09715
PF3D7_0324300	PF3D7_0324300.1	EPF4	Plasmodium falciparum 3D7	Pf3D7_03_v3:1,012,355..1,013,464(+)	exported protein family 4	protein coding gene	Maurer's cleft	N/A	N/A	N/A
PF3D7_0324400	PF3D7_0324400.1	RIF	Plasmodium falciparum 3D7	Pf3D7_03_v3:1,015,795..1,016,942(+)	rifin	protein coding gene	Maurer's cleft;host cell plasma membrane;symbiont-containing vacuole	N/A	antigenic variation;cytoadherence to microvasculature, mediated by symbiont protein;modulation by symbiont of host erythrocyte aggregation	PF02009
PF3D7_0324500	PF3D7_0324500.1	RIF	Plasmodium falciparum 3D7	Pf3D7_03_v3:1,018,874..1,019,973(+)	rifin	protein coding gene	N/A	N/A	N/A	PF02009
PF3D7_0324600	PF3D7_0324600.1	N/A	Plasmodium falciparum 3D7	Pf3D7_03_v3:1,021,998..1,023,008(+)	stevor	protein coding gene	Maurer's cleft;host cell membrane;plasma membrane	N/A	modulation by symbiont of host erythrocyte aggregation	PF17410
PF3D7_0324800	PF3D7_0324800.1	RIF	Plasmodium falciparum 3D7	Pf3D7_03_v3:1,027,571..1,028,929(+)	rifin	protein coding gene	Maurer's cleft;host cell plasma membrane;symbiont-containing vacuole	protein binding	antigenic variation;cytoadherence to microvasculature, mediated by symbiont protein;modulation by symbiont of host erythrocyte aggregation	PF02009
PF3D7_0324900	PF3D7_0324900.1	VAR	Plasmodium falciparum 3D7	Pf3D7_03_v3:1,030,822..1,038,254(-)	erythrocyte membrane protein 1, PfEMP1	protein coding gene	N/A	N/A	N/A	PF03011;PF05424;PF15445;PF15447;PF18562
PF3D7_0400100	PF3D7_0400100.1	VAR	Plasmodium falciparum 3D7	Pf3D7_04_v3:28,706..37,677(+)	erythrocyte membrane protein 1, PfEMP1	protein coding gene	host cell plasma membrane;infected host cell surface knob	cell adhesion molecule binding	antigenic variation;cell-cell adhesion;cytoadherence to microvasculature, mediated by symbiont protein;modulation by symbiont of host erythrocyte aggregation	PF03011;PF05424;PF15445;PF15447;PF18562
PF3D7_0400300	PF3D7_0400300.1	RIF	Plasmodium falciparum 3D7	Pf3D7_04_v3:42,032..43,374(-)	rifin	protein coding gene	Maurer's cleft;host cell plasma membrane;symbiont-containing vacuole	N/A	antigenic variation;cytoadherence to microvasculature, mediated by symbiont protein;modulation by symbiont of host erythrocyte aggregation	PF02009
PF3D7_0400400	PF3D7_0400400.1	VAR	Plasmodium falciparum 3D7	Pf3D7_04_v3:45,555..56,860(-)	erythrocyte membrane protein 1, PfEMP1	protein coding gene	host cell plasma membrane;infected host cell surface knob	cell adhesion molecule binding	antigenic variation;cell-cell adhesion;cytoadherence to microvasculature, mediated by symbiont protein;modulation by symbiont of host erythrocyte aggregation	PF03011;PF05424;PF15445;PF15447;PF18562
PF3D7_0400500	PF3D7_0400500.1	RIF	Plasmodium falciparum 3D7	Pf3D7_04_v3:59,636..60,939(+)	rifin	protein coding gene	Maurer's cleft;host cell plasma membrane;symbiont-containing vacuole	N/A	antigenic variation;cytoadherence to microvasculature, mediated by symbiont protein;modulation by symbiont of host erythrocyte aggregation	PF02009
PF3D7_0400700	PF3D7_0400700.1	RIF	Plasmodium falciparum 3D7	Pf3D7_04_v3:63,104..64,476(-)	rifin	protein coding gene	Maurer's cleft;host cell plasma membrane;symbiont-containing vacuole	N/A	antigenic variation;cytoadherence to microvasculature, mediated by symbiont protein;modulation by symbiont of host erythrocyte aggregation	PF02009
PF3D7_0400800	PF3D7_0400800.1	N/A	Plasmodium falciparum 3D7	Pf3D7_04_v3:66,601..67,573(-)	stevor	protein coding gene	Maurer's cleft	N/A	modulation by symbiont of host erythrocyte aggregation	PF17410
PF3D7_0400900	PF3D7_0400900.1	RIF	Plasmodium falciparum 3D7	Pf3D7_04_v3:69,961..71,113(-)	rifin	protein coding gene	Maurer's cleft;host cell plasma membrane;symbiont-containing vacuole	N/A	antigenic variation;cytoadherence to microvasculature, mediated by symbiont protein;modulation by symbiont of host erythrocyte aggregation	PF02009
PF3D7_0401000	PF3D7_0401000.1	RIF	Plasmodium falciparum 3D7	Pf3D7_04_v3:73,268..74,340(-)	rifin	protein coding gene	host cell plasma membrane	N/A	antigenic variation	PF02009
PF3D7_0401100	PF3D7_0401100.1	N/A	Plasmodium falciparum 3D7	Pf3D7_04_v3:76,033..76,245(-)	Plasmodium exported protein, unknown function, fragment	protein coding gene	N/A	N/A	N/A	N/A
PF3D7_0401200	PF3D7_0401200.1	RIF	Plasmodium falciparum 3D7	Pf3D7_04_v3:79,193..80,451(+)	rifin	protein coding gene	Maurer's cleft;host cell plasma membrane;symbiont-containing vacuole	N/A	antigenic variation;cytoadherence to microvasculature, mediated by symbiont protein;modulation by symbiont of host erythrocyte aggregation	PF02009
PF3D7_0401300	PF3D7_0401300.1	RIF	Plasmodium falciparum 3D7	Pf3D7_04_v3:82,247..83,575(+)	rifin	protein coding gene	Maurer's cleft;host cell plasma membrane;symbiont-containing vacuole	N/A	antigenic variation;cytoadherence to microvasculature, mediated by symbiont protein;modulation by symbiont of host erythrocyte aggregation	PF02009
PF3D7_0401400	PF3D7_0401400.1	RIF	Plasmodium falciparum 3D7	Pf3D7_04_v3:85,397..86,608(+)	rifin	protein coding gene	Maurer's cleft;host cell plasma membrane;symbiont-containing vacuole	N/A	antigenic variation;cytoadherence to microvasculature, mediated by symbiont protein;modulation by symbiont of host erythrocyte aggregation	PF02009
PF3D7_0401600	PF3D7_0401600.1	RIF	Plasmodium falciparum 3D7	Pf3D7_04_v3:92,418..94,121(-)	rifin	protein coding gene	Maurer's cleft	N/A	N/A	PF02009
PF3D7_0401600	PF3D7_0401600.2	RIF	Plasmodium falciparum 3D7	Pf3D7_04_v3:92,418..94,121(-)	rifin	protein coding gene	N/A	N/A	N/A	PF02009
PF3D7_0401800	PF3D7_0401800.1	PfD80	Plasmodium falciparum 3D7	Pf3D7_04_v3:103,078..106,145(-)	Plasmodium exported protein (PHISTb), unknown function	protein coding gene	Maurer's cleft;host cell periphery;host cell surface;nucleus	DNA-binding transcription factor activity;protein binding	regulation of transcription by RNA polymerase II	PF09687
PF3D7_0401900	PF3D7_0401900.1	ACS6	Plasmodium falciparum 3D7	Pf3D7_04_v3:108,357..111,662(-)	acyl-CoA synthetase	protein coding gene	Maurer's cleft;endoplasmic reticulum;membrane	long-chain fatty acid-CoA ligase activity	fatty acid transport	PF00501
PF3D7_0402000	PF3D7_0402000.1	N/A	Plasmodium falciparum 3D7	Pf3D7_04_v3:113,655..116,953(-)	Plasmodium exported protein (PHISTa), unknown function	protein coding gene	Maurer's cleft;host cell periphery;nucleus;symbiont-containing vacuole membrane	mRNA binding;protein binding	N/A	PF09687
PF3D7_0402100	PF3D7_0402100.1	N/A	Plasmodium falciparum 3D7	Pf3D7_04_v3:123,068..125,848(-)	Plasmodium exported protein (PHISTb), unknown function	protein coding gene	Maurer's cleft;host cell	protein binding	N/A	PF09687
PF3D7_0402300	PF3D7_0402300.1	RH1	Plasmodium falciparum 3D7	Pf3D7_04_v3:137,006..147,177(+)	reticulocyte binding protein homologue 1	protein coding gene	apical complex;rhoptry	heparin binding;host cell surface receptor binding	cell-cell adhesion	N/A
PF3D7_0402400	PF3D7_0402400.1	GEXP18	Plasmodium falciparum 3D7	Pf3D7_04_v3:146,710..149,188(-)	Plasmodium exported protein, unknown function	protein coding gene	host cell	N/A	N/A	N/A
PF3D7_0402600	PF3D7_0402600.1	N/A	Plasmodium falciparum 3D7	Pf3D7_04_v3:159,279..160,314(-)	stevor	protein coding gene	Maurer's cleft	N/A	modulation by symbiont of host erythrocyte aggregation	PF17410
PF3D7_0402900	PF3D7_0402900.1	N/A	Plasmodium falciparum 3D7	Pf3D7_04_v3:172,256..173,440(-)	probable protein, unknown function	protein coding gene	N/A	N/A	N/A	N/A
PF3D7_0403100	PF3D7_0403100.1	N/A	Plasmodium falciparum 3D7	Pf3D7_04_v3:175,003..177,360(-)	regulator of chromosome condensation, putative	protein coding gene	mitochondrion;nucleus	N/A	N/A	PF13540
PF3D7_0403200	PF3D7_0403200.1	N/A	Plasmodium falciparum 3D7	Pf3D7_04_v3:177,783..181,051(+)	pre-mRNA splicing factor, putative	protein coding gene	N/A	N/A	N/A	PF12542
PF3D7_0403300	PF3D7_0403300.1	N/A	Plasmodium falciparum 3D7	Pf3D7_04_v3:180,345..181,808(-)	conserved Plasmodium protein, unknown function	protein coding gene	apicoplast	N/A	N/A	N/A
PF3D7_0403400	PF3D7_0403400.1	N/A	Plasmodium falciparum 3D7	Pf3D7_04_v3:181,969..194,734(+)	conserved Plasmodium protein, unknown function	protein coding gene	N/A	N/A	N/A	PF04182
PF3D7_0403500	PF3D7_0403500.1	N/A	Plasmodium falciparum 3D7	Pf3D7_04_v3:195,272..196,988(+)	ubiquitin specific protease, putative	protein coding gene	proteasome complex	N/A	protein deubiquitination	PF00443
PF3D7_0403600	PF3D7_0403600.1	N/A	Plasmodium falciparum 3D7	Pf3D7_04_v3:197,685..202,175(-)	conserved Plasmodium protein, unknown function	protein coding gene	N/A	N/A	N/A	N/A
PF3D7_0403700	PF3D7_0403700.1	CLF1	Plasmodium falciparum 3D7	Pf3D7_04_v3:205,531..209,494(-)	pre-mRNA-splicing factor CLF1, putative	protein coding gene	Prp19 complex;U2-type catalytic step 2 spliceosome;U2-type prespliceosome;catalytic step 2 spliceosome;post-mRNA release spliceosomal complex	RNA binding;chromatin binding	DNA replication initiation;cis assembly of pre-catalytic spliceosome;mRNA splicing, via spliceosome;spliceosomal complex assembly	N/A
PF3D7_0403800	PF3D7_0403800.1	N/A	Plasmodium falciparum 3D7	Pf3D7_04_v3:209,977..216,599(-)	alpha/beta hydrolase, putative	protein coding gene	N/A	N/A	N/A	PF12146
PF3D7_0403900	PF3D7_0403900.1	SET8	Plasmodium falciparum 3D7	Pf3D7_04_v3:218,611..222,971(+)	SET domain protein, putative	protein coding gene	N/A	N/A	N/A	PF00856
PF3D7_0404000	PF3D7_0404000.1	N/A	Plasmodium falciparum 3D7	Pf3D7_04_v3:223,010..224,364(-)	conserved Plasmodium protein, unknown function	protein coding gene	N/A	N/A	N/A	N/A
PF3D7_0404100	PF3D7_0404100.1	ApiAP2	Plasmodium falciparum 3D7	Pf3D7_04_v3:224,779..231,733(-)	AP2 domain transcription factor AP2-SP2, putative	protein coding gene	nucleus	DNA binding	regulation of transcription, DNA-templated	PF00847
PF3D7_0404200	PF3D7_0404200.1	N/A	Plasmodium falciparum 3D7	Pf3D7_04_v3:232,342..233,735(-)	conserved Plasmodium protein, unknown function	protein coding gene	N/A	N/A	N/A	N/A
PF3D7_0404300	PF3D7_0404300.1	N/A	Plasmodium falciparum 3D7	Pf3D7_04_v3:233,990..237,708(-)	conserved Plasmodium protein, unknown function	protein coding gene	nucleus	N/A	N/A	N/A
PF3D7_0404400	PF3D7_0404400.1	P36	Plasmodium falciparum 3D7	Pf3D7_04_v3:238,360..239,499(-)	6-cysteine protein P36	protein coding gene	anchored component of plasma membrane;cell surface;microneme	protein binding	entry into host	PF07422
PF3D7_0404500	PF3D7_0404500.1	P52	Plasmodium falciparum 3D7	Pf3D7_04_v3:240,911..242,347(-)	6-cysteine protein P52	protein coding gene	anchored component of plasma membrane;cell surface;microneme	N/A	entry into host	PF07422
PF3D7_0404600	PF3D7_0404600.1	N/A	Plasmodium falciparum 3D7	Pf3D7_04_v3:244,986..260,286(+)	conserved Plasmodium membrane protein, unknown function	protein coding gene	N/A	N/A	N/A	N/A
PF3D7_0404700	PF3D7_0404700.1	DPAP3	Plasmodium falciparum 3D7	Pf3D7_04_v3:259,944..263,782(-)	dipeptidyl aminopeptidase 3	protein coding gene	apical part of cell;extracellular space;host cell cytosol;lysosome;symbiont-containing vacuole membrane	aminopeptidase activity;cysteine-type endopeptidase activity;cysteine-type peptidase activity	entry into host;protein catabolic process;proteolysis involved in cellular protein catabolic process	PF00112;PF08773
PF3D7_0404800	PF3D7_0404800.1	N/A	Plasmodium falciparum 3D7	Pf3D7_04_v3:264,062..266,503(-)	sporozoite-specific protein S10, putative	protein coding gene	nucleus	N/A	N/A	N/A
PF3D7_0404900	PF3D7_0404900.1	P41	Plasmodium falciparum 3D7	Pf3D7_04_v3:266,566..268,913(-)	6-cysteine protein P41	protein coding gene	anchored component of plasma membrane;cell surface;symbiont-containing vacuolar space	protein binding	entry into host	PF07422
PF3D7_0405000	PF3D7_0405000.1	DDX51	Plasmodium falciparum 3D7	Pf3D7_04_v3:268,919..271,537(-)	ATP-dependent RNA helicase DDX51, putative	protein coding gene	nucleus	RNA helicase activity	RNA metabolic process	PF00270;PF00271
PF3D7_0405100	PF3D7_0405100.1	SEC24B	Plasmodium falciparum 3D7	Pf3D7_04_v3:271,572..277,979(-)	protein transport protein Sec24B, putative	protein coding gene	COPII vesicle coat;Maurer's cleft;endoplasmic reticulum exit site	SNARE binding;zinc ion binding	COPII-coated vesicle cargo loading	PF04811;PF04815;PF08033
PF3D7_0405200	PF3D7_0405200.1	CERLI2	Plasmodium falciparum 3D7	Pf3D7_04_v3:277,684..281,983(+)	protein CERLI2	protein coding gene	rhoptry;rhoptry membrane	N/A	entry into host	N/A
PF3D7_0405300	PF3D7_0405300.1	LISP2	Plasmodium falciparum 3D7	Pf3D7_04_v3:282,403..288,297(-)	liver specific protein 2, putative	protein coding gene	host cell cytoplasm;host cell nucleus;nucleus;symbiont-containing vacuole	N/A	N/A	PF00132;PF07422
PF3D7_0405400	PF3D7_0405400.1	PRPF8	Plasmodium falciparum 3D7	Pf3D7_04_v3:290,361..301,167(+)	pre-mRNA-processing-splicing factor 8, putative	protein coding gene	U5 snRNP;apicoplast;catalytic step 2 spliceosome;nucleus;spliceosomal complex	U1 snRNA binding;U2 snRNA binding;U5 snRNA binding;U6 snRNA binding;pre-mRNA intronic binding	RNA splicing;RNA splicing, via transesterification reactions;spliceosomal tri-snRNP complex assembly	PF08082;PF08083;PF08084;PF10596;PF10597;PF10598;PF12134
PF3D7_0405500	PF3D7_0405500.1	N/A	Plasmodium falciparum 3D7	Pf3D7_04_v3:301,259..302,267(-)	conserved Plasmodium protein, unknown function	protein coding gene	N/A	N/A	N/A	N/A
PF3D7_0405600	PF3D7_0405600.1	N/A	Plasmodium falciparum 3D7	Pf3D7_04_v3:302,892..305,696(+)	TMEM33 domain-containing protein, putative	protein coding gene	endoplasmic reticulum	N/A	endoplasmic reticulum tubular network organization;membrane organization	PF03661
PF3D7_0405700	PF3D7_0405700.1	N/A	Plasmodium falciparum 3D7	Pf3D7_04_v3:305,485..313,556(-)	lysine decarboxylase, putative	protein coding gene	N/A	lysine decarboxylase activity	lysine catabolic process	PF01276
PF3D7_0405800	PF3D7_0405800.1	N/A	Plasmodium falciparum 3D7	Pf3D7_04_v3:315,105..315,919(+)	conserved protein, unknown function	protein coding gene	mitochondrion	N/A	N/A	N/A
PF3D7_0405900	PF3D7_0405900.1	ASP	Plasmodium falciparum 3D7	Pf3D7_04_v3:315,974..319,564(-)	apical sushi protein	protein coding gene	anchored component of plasma membrane;microneme;rhoptry neck	binding	N/A	PF00084
PF3D7_0406000	PF3D7_0406000.1	N/A	Plasmodium falciparum 3D7	Pf3D7_04_v3:320,299..322,945(+)	conserved protein, unknown function	protein coding gene	cytoplasm	N/A	N/A	N/A
PF3D7_0406100	PF3D7_0406100.1	N/A	Plasmodium falciparum 3D7	Pf3D7_04_v3:322,950..325,688(-)	V-type proton ATPase subunit B	protein coding gene	nucleus	protein binding;proton-transporting ATPase activity, rotational mechanism	vacuolar acidification	PF00006;PF02874
PF3D7_0406200	PF3D7_0406200.1	Pfs16	Plasmodium falciparum 3D7	Pf3D7_04_v3:328,473..330,639(+)	parasitophorous vacuole membrane protein S16	protein coding gene	cell surface;integral component of membrane;nucleus;symbiont-containing vacuole membrane	N/A	N/A	PF09716
PF3D7_0406400	PF3D7_0406400.1	cGLO2	Plasmodium falciparum 3D7	Pf3D7_04_v3:331,524..334,219(+)	cytosolic glyoxalase II	protein coding gene	cytosol	hydroxyacylglutathione hydrolase activity	N/A	PF00753;PF16123
PF3D7_0406500	PF3D7_0406500.1	N/A	Plasmodium falciparum 3D7	Pf3D7_04_v3:333,546..345,127(-)	NYN domain-containing protein, putative	protein coding gene	N/A	N/A	N/A	N/A
PF3D7_0406600	PF3D7_0406600.1	N/A	Plasmodium falciparum 3D7	Pf3D7_04_v3:346,308..346,727(+)	conserved protein, unknown function	protein coding gene	N/A	N/A	N/A	N/A
PF3D7_0406700	PF3D7_0406700.1	N/A	Plasmodium falciparum 3D7	Pf3D7_04_v3:347,345..352,121(+)	KLRAQ domain-containing protein, putative	protein coding gene	N/A	N/A	N/A	N/A
PF3D7_0406800	PF3D7_0406800.1	N/A	Plasmodium falciparum 3D7	Pf3D7_04_v3:351,527..353,137(-)	ribosomal protein L25, putative	protein coding gene	cytosolic large ribosomal subunit;mitochondrion	5S rRNA binding	translation	N/A
PF3D7_0406900	PF3D7_0406900.1	N/A	Plasmodium falciparum 3D7	Pf3D7_04_v3:353,655..359,878(-)	conserved Plasmodium protein, unknown function	protein coding gene	N/A	N/A	N/A	N/A
PF3D7_0407000	PF3D7_0407000.1	N/A	Plasmodium falciparum 3D7	Pf3D7_04_v3:360,382..361,906(-)	conserved Plasmodium protein, unknown function	protein coding gene	N/A	N/A	N/A	N/A
PF3D7_0407100	PF3D7_0407100.1	N/A	Plasmodium falciparum 3D7	Pf3D7_04_v3:361,974..364,336(+)	methyltransferase, putative	protein coding gene	cytoplasm;mitochondrion	methyltransferase activity	N/A	PF08241
PF3D7_0407200	PF3D7_0407200.1	PTH2	Plasmodium falciparum 3D7	Pf3D7_04_v3:363,313..365,044(-)	peptidyl-tRNA hydrolase 2, putative	protein coding gene	apicoplast;cytosol;mitochondrion	aminoacyl-tRNA hydrolase activity	N/A	PF01981
PF3D7_0407300	PF3D7_0407300.1	N/A	Plasmodium falciparum 3D7	Pf3D7_04_v3:365,916..367,353(+)	transcription factor, putative	protein coding gene	RNA polymerase I complex	N/A	termination of RNA polymerase I transcription	PF01096
PF3D7_0407400	PF3D7_0407400.1	N/A	Plasmodium falciparum 3D7	Pf3D7_04_v3:367,527..368,741(-)	conserved Plasmodium protein, unknown function	protein coding gene	N/A	N/A	N/A	N/A
PF3D7_0407500	PF3D7_0407500.1	N/A	Plasmodium falciparum 3D7	Pf3D7_04_v3:369,885..371,270(+)	mitochondrial carrier protein, putative	protein coding gene	mitochondrion	N/A	N/A	PF00153
PF3D7_0407600	PF3D7_0407600.1	N/A	Plasmodium falciparum 3D7	Pf3D7_04_v3:373,039..376,677(+)	conserved Plasmodium protein, unknown function	protein coding gene	N/A	N/A	N/A	N/A
PF3D7_0407700	PF3D7_0407700.1	N/A	Plasmodium falciparum 3D7	Pf3D7_04_v3:376,962..383,799(-)	conserved Plasmodium protein, unknown function	protein coding gene	NELF complex	RNA binding	negative regulation of transcription elongation from RNA polymerase II promoter	N/A
PF3D7_0407800	PF3D7_0407800.1	CINCH	Plasmodium falciparum 3D7	Pf3D7_04_v3:384,240..391,362(+)	protein CINCH	protein coding gene	basal part of cell;inner membrane pellicle complex;nucleus	protein binding	cell division	N/A
PF3D7_0407900	PF3D7_0407900.1	N/A	Plasmodium falciparum 3D7	Pf3D7_04_v3:390,866..394,044(-)	AAA family ATPase, putative	protein coding gene	nucleus	ATP hydrolysis activity;microtubule-severing ATPase activity	cytoplasmic microtubule organization;regulation of double-strand break repair via homologous recombination	PF00004
PF3D7_0408000	PF3D7_0408000.1	N/A	Plasmodium falciparum 3D7	Pf3D7_04_v3:394,047..394,714(-)	conserved Plasmodium protein, unknown function	protein coding gene	N/A	N/A	N/A	N/A
PF3D7_0408100	PF3D7_0408100.1	N/A	Plasmodium falciparum 3D7	Pf3D7_04_v3:396,410..401,290(+)	conserved Plasmodium protein, unknown function	protein coding gene	N/A	N/A	N/A	N/A
PF3D7_0408200	PF3D7_0408200.1	N/A	Plasmodium falciparum 3D7	Pf3D7_04_v3:401,320..403,441(+)	conserved Plasmodium protein, unknown function	protein coding gene	N/A	N/A	N/A	N/A
PF3D7_0408300	PF3D7_0408300.1	ZRANB2	Plasmodium falciparum 3D7	Pf3D7_04_v3:403,032..405,486(-)	zinc finger Ran-binding domain-containing protein 2, putative	protein coding gene	nucleus	N/A	N/A	PF00641
PF3D7_0408400	PF3D7_0408400.1	N/A	Plasmodium falciparum 3D7	Pf3D7_04_v3:405,513..408,243(-)	conserved protein, unknown function	protein coding gene	mitochondrion	N/A	N/A	N/A
PF3D7_0408500	PF3D7_0408500.1	FEN1	Plasmodium falciparum 3D7	Pf3D7_04_v3:408,485..411,102(-)	flap endonuclease 1	protein coding gene	nucleus	5'-3' exonuclease activity;5'-flap endonuclease activity;endodeoxyribonuclease activity;flap endonuclease activity	N/A	PF00752;PF00867
PF3D7_0408600	PF3D7_0408600.1	SIAP1	Plasmodium falciparum 3D7	Pf3D7_04_v3:413,403..416,357(+)	sporozoite invasion-associated protein 1	protein coding gene	apical part of cell;cell surface	N/A	N/A	N/A
PF3D7_0408700	PF3D7_0408700.1	PLP1	Plasmodium falciparum 3D7	Pf3D7_04_v3:417,372..420,824(-)	perforin-like protein 1	protein coding gene	Maurer's cleft;cell surface;host cell membrane;membrane;microneme;symbiont-containing vacuole membrane	calcium ion binding;wide pore channel activity	pore complex assembly	PF01823
PF3D7_0408800	PF3D7_0408800.1	N/A	Plasmodium falciparum 3D7	Pf3D7_04_v3:422,011..422,958(-)	conserved Plasmodium protein, unknown function	protein coding gene	N/A	N/A	N/A	N/A
PF3D7_0408900	PF3D7_0408900.1	KAE1	Plasmodium falciparum 3D7	Pf3D7_04_v3:424,078..427,891(+)	tRNA N6-adenosine threonylcarbamoyltransferase	protein coding gene	EKC/KEOPS complex;apicoplast	DNA binding;protein binding	N/A	PF00814
PF3D7_0408900	PF3D7_0408900.2	KAE1	Plasmodium falciparum 3D7	Pf3D7_04_v3:424,078..427,891(+)	tRNA N6-adenosine threonylcarbamoyltransferase	protein coding gene	EKC/KEOPS complex;apicoplast	N/A	N/A	PF00814
PF3D7_0409000	PF3D7_0409000.1	N/A	Plasmodium falciparum 3D7	Pf3D7_04_v3:427,283..435,517(-)	conserved Plasmodium protein, unknown function	protein coding gene	N/A	N/A	N/A	N/A
PF3D7_0409100	PF3D7_0409100.1	PRPF31	Plasmodium falciparum 3D7	Pf3D7_04_v3:435,640..438,373(-)	U4/U6 small nuclear ribonucleoprotein PRP31, putative	protein coding gene	U4 snRNP;U4/U6 x U5 tri-snRNP complex;precatalytic spliceosome;spliceosomal complex;spliceosomal tri-snRNP complex	N/A	RNA splicing;RNA splicing, via transesterification reactions;mRNA splicing, via spliceosome;spliceosomal snRNP assembly	PF01798;PF09785
PF3D7_0409200	PF3D7_0409200.1	SOF1	Plasmodium falciparum 3D7	Pf3D7_04_v3:438,826..440,791(+)	protein SOF1, putative	protein coding gene	Cul4-RING E3 ubiquitin ligase complex;nucleolus;small-subunit processome;sno(s)RNA-containing ribonucleoprotein complex	N/A	maturation of SSU-rRNA from tricistronic rRNA transcript (SSU-rRNA, 5.8S rRNA, LSU-rRNA);rRNA modification	PF00400;PF04158
PF3D7_0409300	PF3D7_0409300.1	N/A	Plasmodium falciparum 3D7	Pf3D7_04_v3:440,536..445,079(-)	methyltransferase, putative	protein coding gene	N/A	N/A	N/A	N/A
PF3D7_0409400	PF3D7_0409400.1	DnaJ	Plasmodium falciparum 3D7	Pf3D7_04_v3:445,327..448,141(+)	chaperone protein DnaJ	protein coding gene	apicoplast;cytoplasm;mitochondrion	DNA binding;DNA replication origin binding;unfolded protein binding	chaperone cofactor-dependent protein refolding;protein refolding;response to heat	PF00226;PF00684;PF01556
PF3D7_0409500	PF3D7_0409500.1	N/A	Plasmodium falciparum 3D7	Pf3D7_04_v3:448,569..450,669(-)	NAD(P)-binding protein, putative	protein coding gene	apicoplast	N/A	N/A	PF00106;PF08659
PF3D7_0409600	PF3D7_0409600.1	RPA1	Plasmodium falciparum 3D7	Pf3D7_04_v3:451,590..456,137(-)	replication protein A1, large subunit	protein coding gene	DNA replication factor A complex;nucleus	damaged DNA binding;sequence-specific DNA binding;single-stranded DNA binding;single-stranded telomeric DNA binding	DNA repair;DNA replication;DNA unwinding involved in DNA replication;DNA-dependent DNA replication;double-strand break repair via homologous recombination;meiotic cell cycle;nucleotide-excision repair;regulation of DNA metabolic process;telomere maintenance;telomere maintenance via telomerase	PF01336;PF08646;PF16900
PF3D7_0409700	PF3D7_0409700.1	RF2	Plasmodium falciparum 3D7	Pf3D7_04_v3:456,470..458,157(+)	peptide chain release factor 2	protein coding gene	apicoplast;cytoplasm;mitochondrial large ribosomal subunit	N/A	N/A	PF00472
PF3D7_0409800	PF3D7_0409800.1	N/A	Plasmodium falciparum 3D7	Pf3D7_04_v3:458,379..462,772(+)	zinc finger protein, putative	protein coding gene	nucleus;preribosome, large subunit precursor	N/A	ribosomal large subunit biogenesis	PF12756
PF3D7_0409900	PF3D7_0409900.1	ALP5b	Plasmodium falciparum 3D7	Pf3D7_04_v3:461,577..464,007(-)	actin-like protein, putative	protein coding gene	Arp2/3 protein complex;actin cytoskeleton	structural constituent of cytoskeleton	Arp2/3 complex-mediated actin nucleation;cytoskeleton organization	PF00022
PF3D7_0410000	PF3D7_0410000.1	EVP1	Plasmodium falciparum 3D7	Pf3D7_04_v3:464,039..468,171(-)	erythrocyte vesicle protein 1	protein coding gene	host cell cytoplasmic vesicle;host cell cytosol	N/A	N/A	N/A
PF3D7_0410300	PF3D7_0410300.1	PPM1	Plasmodium falciparum 3D7	Pf3D7_04_v3:470,021..473,920(-)	protein phosphatase PPM1, putative	protein coding gene	cytoplasm;nucleus	magnesium-dependent protein serine/threonine phosphatase activity;phosphoprotein phosphatase activity;protein serine/threonine phosphatase activity	protein dephosphorylation	PF00481
PF3D7_0410400	PF3D7_0410400.1	RRP4	Plasmodium falciparum 3D7	Pf3D7_04_v3:474,132..475,694(+)	exosome complex component RRP4	protein coding gene	TRAMP complex;cytoplasm;cytoplasmic exosome (RNase complex);exosome (RNase complex);nuclear exosome (RNase complex)	3'-5'-exoribonuclease activity;RNA binding;protein binding	CUT catabolic process;U4 snRNA 3'-end processing;exonucleolytic catabolism of deadenylated mRNA;exonucleolytic trimming to generate mature 3'-end of 5.8S rRNA from tricistronic rRNA transcript (SSU-rRNA, 5.8S rRNA, LSU-rRNA);nuclear polyadenylation-dependent rRNA catabolic process;nuclear polyadenyl	PF15985
PF3D7_0410500	PF3D7_0410500.1	N/A	Plasmodium falciparum 3D7	Pf3D7_04_v3:475,944..476,585(-)	conserved Plasmodium protein, unknown function	protein coding gene	cytoplasm	N/A	N/A	N/A
PF3D7_0410600	PF3D7_0410600.1	ATRP	Plasmodium falciparum 3D7	Pf3D7_04_v3:478,964..481,141(+)	armadillo-type repeat protein ATRP	protein coding gene	cell periphery;cytoplasm;endoplasmic reticulum;inner membrane pellicle complex	adenyl-nucleotide exchange factor activity	N/A	N/A
PF3D7_0410700	PF3D7_0410700.1	RbgA	Plasmodium falciparum 3D7	Pf3D7_04_v3:480,653..485,264(-)	ribosome biogenesis GTPase A, putative	protein coding gene	apicoplast;mitochondrion	GTP binding;GTPase activity	N/A	PF01926
PF3D7_0410800	PF3D7_0410800.1	N/A	Plasmodium falciparum 3D7	Pf3D7_04_v3:484,937..489,959(+)	conserved Plasmodium protein, unknown function	protein coding gene	nucleus	N/A	N/A	N/A
PF3D7_0410900	PF3D7_0410900.1	N/A	Plasmodium falciparum 3D7	Pf3D7_04_v3:490,388..494,260(-)	conserved Plasmodium protein, unknown function	protein coding gene	nucleus	N/A	N/A	N/A
PF3D7_0411000	PF3D7_0411000.1	N/A	Plasmodium falciparum 3D7	Pf3D7_04_v3:498,831..503,922(+)	conserved Plasmodium protein, unknown function	protein coding gene	Maurer's cleft	N/A	N/A	N/A
PF3D7_0411100	PF3D7_0411100.1	MED8	Plasmodium falciparum 3D7	Pf3D7_04_v3:504,413..505,095(-)	mediator of RNA polymerase II transcription subunit 8, putative	protein coding gene	mediator complex	N/A	N/A	N/A
PF3D7_0411200	PF3D7_0411200.1	N/A	Plasmodium falciparum 3D7	Pf3D7_04_v3:505,544..509,792(-)	PP-loop family protein, putative	protein coding gene	apicoplast	N/A	N/A	PF01171
PF3D7_0411300	PF3D7_0411300.1	N/A	Plasmodium falciparum 3D7	Pf3D7_04_v3:510,180..512,923(+)	conserved Plasmodium protein, unknown function	protein coding gene	N/A	N/A	N/A	N/A
PF3D7_0411400	PF3D7_0411400.1	N/A	Plasmodium falciparum 3D7	Pf3D7_04_v3:513,083..517,579(-)	DEAD box ATP-dependent RNA helicase, putative	protein coding gene	nucleus	RNA helicase activity	RNA metabolic process;rRNA processing	PF00270;PF00271
PF3D7_0411700	PF3D7_0411700.1	N/A	Plasmodium falciparum 3D7	Pf3D7_04_v3:518,685..519,101(-)	conserved Plasmodium protein, unknown function	protein coding gene	N/A	N/A	N/A	N/A
PF3D7_0411800	PF3D7_0411800.1	N/A	Plasmodium falciparum 3D7	Pf3D7_04_v3:519,261..526,401(-)	conserved Plasmodium protein, unknown function	protein coding gene	N/A	N/A	N/A	N/A
PF3D7_0411900	PF3D7_0411900.1	N/A	Plasmodium falciparum 3D7	Pf3D7_04_v3:527,408..535,614(-)	DNA polymerase alpha catalytic subunit A	protein coding gene	alpha DNA polymerase:primase complex	3'-5' exonuclease activity;DNA replication origin binding;DNA-directed DNA polymerase activity;chromatin binding;purine nucleotide binding;pyrimidine nucleotide binding;single-stranded DNA binding	DNA replication;lagging strand elongation;leading strand elongation;mitotic DNA replication initiation	PF00136
PF3D7_0412000	PF3D7_0412000.1	N/A	Plasmodium falciparum 3D7	Pf3D7_04_v3:536,310..540,069(+)	LITAF-like zinc finger protein, putative	protein coding gene	N/A	N/A	N/A	PF10601
PF3D7_0412100	PF3D7_0412100.1	mtRPS12	Plasmodium falciparum 3D7	Pf3D7_04_v3:539,768..541,690(-)	ribosomal protein S12, mitochondrial	protein coding gene	mitochondrion;nucleus;ribosome;small ribosomal subunit	structural constituent of ribosome	mitochondrial translation;response to xenobiotic stimulus;translation	PF00164
PF3D7_0412200	PF3D7_0412200.1	N/A	Plasmodium falciparum 3D7	Pf3D7_04_v3:541,759..543,070(-)	conserved Plasmodium protein, unknown function	protein coding gene	osmiophilic body	N/A	N/A	N/A
PF3D7_0412300	PF3D7_0412300.1	N/A	Plasmodium falciparum 3D7	Pf3D7_04_v3:543,378..545,746(+)	phosphopantothenoylcysteine synthetase, putative	protein coding gene	cytoplasm;nucleus	phosphopantothenate--cysteine ligase activity	coenzyme A biosynthetic process	PF04127
PF3D7_0412400	PF3D7_0412400.1	VAR	Plasmodium falciparum 3D7	Pf3D7_04_v3:545,623..554,633(-)	erythrocyte membrane protein 1, PfEMP1	protein coding gene	host cell plasma membrane;infected host cell surface knob	cell adhesion molecule binding	antigenic variation;cell-cell adhesion;cytoadherence to microvasculature, mediated by symbiont protein;modulation by symbiont of host erythrocyte aggregation	PF03011;PF05424;PF15445;PF15447;PF18562
PF3D7_0412700	PF3D7_0412700.1	VAR	Plasmodium falciparum 3D7	Pf3D7_04_v3:561,183..570,348(-)	erythrocyte membrane protein 1, PfEMP1	protein coding gene	host cell plasma membrane;infected host cell surface knob	cell adhesion molecule binding	antigenic variation;cell-cell adhesion;cytoadherence to microvasculature, mediated by symbiont protein;modulation by symbiont of host erythrocyte aggregation	PF03011;PF05424;PF15445;PF15447;PF18562
PF3D7_0412900	PF3D7_0412900.1	VAR	Plasmodium falciparum 3D7	Pf3D7_04_v3:576,810..584,668(-)	erythrocyte membrane protein 1, PfEMP1	protein coding gene	host cell plasma membrane;infected host cell surface knob	cell adhesion molecule binding	antigenic variation;cell-cell adhesion;cytoadherence to microvasculature, mediated by symbiont protein;modulation by symbiont of host erythrocyte aggregation	PF03011;PF05424;PF15445;PF15447;PF18562
PF3D7_0413100	PF3D7_0413100.1	VAR	Plasmodium falciparum 3D7	Pf3D7_04_v3:591,949..599,849(-)	erythrocyte membrane protein 1, PfEMP1	protein coding gene	host cell plasma membrane;infected host cell surface knob	cell adhesion molecule binding	antigenic variation;cell-cell adhesion;cytoadherence to microvasculature, mediated by symbiont protein;modulation by symbiont of host erythrocyte aggregation	PF03011;PF05424;PF15445;PF15447;PF18562
PF3D7_0413200	PF3D7_0413200.1	RIF	Plasmodium falciparum 3D7	Pf3D7_04_v3:603,166..604,456(-)	rifin	protein coding gene	Maurer's cleft;host cell plasma membrane;symbiont-containing vacuole	N/A	antigenic variation;cytoadherence to microvasculature, mediated by symbiont protein;modulation by symbiont of host erythrocyte aggregation	PF02009
PF3D7_0413300	PF3D7_0413300.1	RIF	Plasmodium falciparum 3D7	Pf3D7_04_v3:609,155..610,433(+)	rifin	protein coding gene	Maurer's cleft;host cell plasma membrane;symbiont-containing vacuole	N/A	antigenic variation;cytoadherence to microvasculature, mediated by symbiont protein;modulation by symbiont of host erythrocyte aggregation	PF02009
PF3D7_0413500	PF3D7_0413500.1	PGM2	Plasmodium falciparum 3D7	Pf3D7_04_v3:615,161..616,685(+)	phosphoglucomutase-2	protein coding gene	cytoplasm;mitochondrion	phosphoglycerate mutase activity	glycolytic process	PF00300
PF3D7_0413600	PF3D7_0413600.1	RPT3	Plasmodium falciparum 3D7	Pf3D7_04_v3:616,407..618,468(-)	26S protease regulatory subunit 6B, putative	protein coding gene	cytosolic proteasome complex;nucleus;proteasome regulatory particle;proteasome regulatory particle, base subcomplex	ATP hydrolysis activity	positive regulation of RNA polymerase II transcription preinitiation complex assembly;proteasome regulatory particle assembly;ubiquitin-dependent protein catabolic process	PF00004;PF16450;PF17862
PF3D7_0413700	PF3D7_0413700.1	N/A	Plasmodium falciparum 3D7	Pf3D7_04_v3:619,189..621,405(-)	lysine decarboxylase-like protein, putative	protein coding gene	cytosol	N/A	N/A	PF03641
PF3D7_0413800	PF3D7_0413800.1	N/A	Plasmodium falciparum 3D7	Pf3D7_04_v3:621,595..622,959(+)	50S ribosomal protein L10, putative	protein coding gene	apicoplast;large ribosomal subunit;mitochondrion;ribosome	structural constituent of ribosome	translation	PF00466
PF3D7_0413900	PF3D7_0413900.1	USP13	Plasmodium falciparum 3D7	Pf3D7_04_v3:622,894..626,416(-)	ubiquitin carboxyl-terminal hydrolase 13, putative	protein coding gene	proteasome complex	deubiquitinase activity;thiol-dependent deubiquitinase;ubiquitin binding	ubiquitin-dependent protein catabolic process	PF00443;PF02148;PF09288;PF17807
PF3D7_0414000	PF3D7_0414000.1	SMC3	Plasmodium falciparum 3D7	Pf3D7_04_v3:626,435..633,382(-)	structural maintenance of chromosomes protein 3	protein coding gene	chromatin;chromosome, centromeric region;nuclear chromosome;nuclear mitotic cohesin complex;nuclear periphery;nucleus	ATP binding;chromatin binding;minor groove of adenine-thymine-rich DNA binding;protein binding	chromosome organization;mitotic sister chromatid segregation;regulation of DNA replication	PF02463;PF06470;PF13476
PF3D7_0414100	PF3D7_0414100.1	N/A	Plasmodium falciparum 3D7	Pf3D7_04_v3:633,501..639,156(-)	conserved Plasmodium membrane protein, unknown function	protein coding gene	apicoplast	N/A	N/A	N/A
PF3D7_0414200	PF3D7_0414200.1	N/A	Plasmodium falciparum 3D7	Pf3D7_04_v3:646,996..648,777(-)	calmodulin-like protein	protein coding gene	N/A	N/A	N/A	N/A
PF3D7_0414200	PF3D7_0414200.2	N/A	Plasmodium falciparum 3D7	Pf3D7_04_v3:646,996..648,777(-)	calmodulin-like protein	protein coding gene	N/A	N/A	N/A	N/A
PF3D7_0414300	PF3D7_0414300.1	N/A	Plasmodium falciparum 3D7	Pf3D7_04_v3:649,273..650,954(-)	Rab5-interacting protein, putative	protein coding gene	EMC complex;mitochondrion	N/A	autophagosome assembly	PF07019
PF3D7_0414400	PF3D7_0414400.1	N/A	Plasmodium falciparum 3D7	Pf3D7_04_v3:652,350..653,554(+)	conserved Plasmodium protein, unknown function	protein coding gene	N/A	N/A	N/A	N/A
PF3D7_0414500	PF3D7_0414500.1	N/A	Plasmodium falciparum 3D7	Pf3D7_04_v3:654,179..657,778(-)	RNA-binding protein, putative	protein coding gene	N/A	nucleic acid binding	RNA metabolic process	PF00076
PF3D7_0414600	PF3D7_0414600.1	APH	Plasmodium falciparum 3D7	Pf3D7_04_v3:658,117..659,834(-)	acylated pleckstrin-homology domain-containing protein, putative	protein coding gene	apical part of cell;microneme	N/A	N/A	PF00169
PF3D7_0414700	PF3D7_0414700.1	N/A	Plasmodium falciparum 3D7	Pf3D7_04_v3:660,048..663,084(+)	GTP-binding protein, putative	protein coding gene	apicoplast	GTP binding	N/A	PF01926;PF17835
PF3D7_0414800	PF3D7_0414800.1	N/A	Plasmodium falciparum 3D7	Pf3D7_04_v3:663,115..664,901(-)	conserved Plasmodium protein, unknown function	protein coding gene	N/A	N/A	N/A	N/A
PF3D7_0414900	PF3D7_0414900.1	ARO	Plasmodium falciparum 3D7	Pf3D7_04_v3:665,765..668,508(+)	armadillo-domain containing rhoptry protein	protein coding gene	anchored component of membrane;apical part of cell;cytosol;nucleus;rhoptry	DNA binding	N/A	N/A
PF3D7_0415000	PF3D7_0415000.1	GET3	Plasmodium falciparum 3D7	Pf3D7_04_v3:668,291..669,784(-)	ATPase GET3	protein coding gene	GET complex;cytosol;endoplasmic reticulum;membrane	ATP hydrolysis activity;ATPase-coupled arsenite transmembrane transporter activity;protein binding	ion transport;posttranslational protein targeting to endoplasmic reticulum membrane	PF02374
PF3D7_0415100	PF3D7_0415100.1	N/A	Plasmodium falciparum 3D7	Pf3D7_04_v3:670,824..672,750(+)	conserved protein, unknown function	protein coding gene	cytoplasm	rRNA (uridine-N3-)-methyltransferase activity	rRNA base methylation	PF10354
PF3D7_0415200	PF3D7_0415200.1	N/A	Plasmodium falciparum 3D7	Pf3D7_04_v3:672,035..679,718(-)	conserved Plasmodium protein, unknown function	protein coding gene	N/A	N/A	N/A	N/A
PF3D7_0415300	PF3D7_0415300.1	CRK3	Plasmodium falciparum 3D7	Pf3D7_04_v3:681,263..686,296(+)	cdc2-related protein kinase 3	protein coding gene	cyclin-dependent protein kinase holoenzyme complex;nucleus	RNA polymerase II CTD heptapeptide repeat kinase activity;cyclin-dependent protein serine/threonine kinase activity;histone deacetylase activity;protein kinase activity	phosphorylation of RNA polymerase II C-terminal domain;positive regulation of transcription elongation from RNA polymerase II promoter;protein phosphorylation	PF00069
PF3D7_0415400	PF3D7_0415400.1	N/A	Plasmodium falciparum 3D7	Pf3D7_04_v3:686,017..687,474(-)	coatomer subunit zeta, putative	protein coding gene	COPI vesicle coat	N/A	intra-Golgi vesicle-mediated transport;intracellular protein transport;retrograde vesicle-mediated transport, Golgi to endoplasmic reticulum	PF01217
PF3D7_0415500	PF3D7_0415500.1	CBP20	Plasmodium falciparum 3D7	Pf3D7_04_v3:688,057..689,439(+)	nuclear cap-binding protein subunit 2, putative	protein coding gene	nuclear cap binding complex	RNA cap binding	mRNA processing;mRNA splicing, via spliceosome	PF00076
PF3D7_0415600	PF3D7_0415600.1	GAK	Plasmodium falciparum 3D7	Pf3D7_04_v3:689,248..690,639(-)	GTP:AMP phosphotransferase	protein coding gene	cytoplasm;mitochondrial matrix;mitochondrion	GTP binding;adenylate kinase activity;nucleoside triphosphate adenylate kinase activity	nucleobase-containing compound metabolic process;nucleoside diphosphate metabolic process;purine nucleotide metabolic process	PF00406
PF3D7_0415700	PF3D7_0415700.1	N/A	Plasmodium falciparum 3D7	Pf3D7_04_v3:690,721..692,635(-)	conserved Plasmodium protein, unknown function	protein coding gene	apicoplast	N/A	N/A	N/A
PF3D7_0415800	PF3D7_0415800.1	N/A	Plasmodium falciparum 3D7	Pf3D7_04_v3:693,250..696,792(+)	PhIL1-interacting candidate PIC3	protein coding gene	inner membrane pellicle complex	zinc ion binding	N/A	PF13923
PF3D7_0415900	PF3D7_0415900.1	N/A	Plasmodium falciparum 3D7	Pf3D7_04_v3:697,475..700,443(-)	60S ribosomal protein L15, putative	protein coding gene	cytosolic large ribosomal subunit;nucleus;ribosome	RNA binding;structural constituent of ribosome	cytoplasmic translation;translation	PF00827
PF3D7_0416000	PF3D7_0416000.1	N/A	Plasmodium falciparum 3D7	Pf3D7_04_v3:700,633..705,339(-)	RNA-binding protein, putative	protein coding gene	N/A	RNA binding;nucleic acid binding	N/A	PF00076
PF3D7_0416100	PF3D7_0416100.1	GATA	Plasmodium falciparum 3D7	Pf3D7_04_v3:706,094..709,615(+)	glutamyl-tRNA(Gln) amidotransferase subunit A	protein coding gene	apicoplast;glutamyl-tRNA(Gln) amidotransferase complex	glutaminyl-tRNA synthase (glutamine-hydrolyzing) activity	glutaminyl-tRNAGln biosynthesis via transamidation	PF01425
PF3D7_0416200	PF3D7_0416200.1	N/A	Plasmodium falciparum 3D7	Pf3D7_04_v3:708,854..710,099(-)	PRKR-interacting protein 1, putative	protein coding gene	nucleolus	double-stranded RNA binding;protein kinase binding;protein kinase inhibitor activity	negative regulation of protein kinase activity	PF06658
PF3D7_0416300	PF3D7_0416300.1	MCM9	Plasmodium falciparum 3D7	Pf3D7_04_v3:710,117..715,849(-)	DNA helicase MCM9, putative	protein coding gene	MCM complex;nucleus	ATP-dependent activity, acting on DNA;DNA replication origin binding;single-stranded DNA binding	DNA replication initiation;double-strand break repair via homologous recombination	PF00493;PF17207;PF17855
PF3D7_0416400	PF3D7_0416400.1	HAT1	Plasmodium falciparum 3D7	Pf3D7_04_v3:717,422..723,139(+)	histone acetyltransferase, putative	protein coding gene	nucleus	H4 histone acetyltransferase activity	histone H4 acetylation	PF10394
PF3D7_0416500	PF3D7_0416500.1	MAF1	Plasmodium falciparum 3D7	Pf3D7_04_v3:722,433..724,446(-)	repressor of RNA polymerase III transcription MAF1	protein coding gene	cytoplasm;nucleus	RNA polymerase III core binding	negative regulation of transcription by RNA polymerase III	PF09174
PF3D7_0416600	PF3D7_0416600.1	PHBL	Plasmodium falciparum 3D7	Pf3D7_04_v3:724,910..727,410(+)	prohibitin-like protein PHBL, putative	protein coding gene	mitochondrion	N/A	regulation of mitochondrial membrane potential	N/A
PF3D7_0416700	PF3D7_0416700.1	N/A	Plasmodium falciparum 3D7	Pf3D7_04_v3:727,456..728,891(-)	CDGSH iron-sulfur domain-containing protein, putative	protein coding gene	mitochondrion	N/A	N/A	PF09360
PF3D7_0416800	PF3D7_0416800.1	SAR1	Plasmodium falciparum 3D7	Pf3D7_04_v3:729,587..731,615(+)	small GTP-binding protein sar1	protein coding gene	COPII vesicle coat;Maurer's cleft;endoplasmic reticulum;endoplasmic reticulum exit site;food vacuole	GTPase activity	endoplasmic reticulum to Golgi vesicle-mediated transport;intracellular protein transport;membrane organization;positive regulation of protein exit from endoplasmic reticulum;regulation of COPII vesicle coating;vesicle organization	PF00025
PF3D7_0416900	PF3D7_0416900.1	N/A	Plasmodium falciparum 3D7	Pf3D7_04_v3:732,052..740,562(-)	conserved Plasmodium protein, unknown function	protein coding gene	N/A	N/A	N/A	N/A
PF3D7_0417000	PF3D7_0417000.1	N/A	Plasmodium falciparum 3D7	Pf3D7_04_v3:741,816..743,452(+)	conserved Plasmodium protein, unknown function	protein coding gene	N/A	N/A	N/A	N/A
PF3D7_0417100	PF3D7_0417100.1	PUF2	Plasmodium falciparum 3D7	Pf3D7_04_v3:743,611..745,637(-)	mRNA-binding protein PUF2	protein coding gene	cytoplasm;cytosol	RNA binding;mRNA binding;protein binding	negative regulation of translation;posttranscriptional regulation of gene expression	PF00806
PF3D7_0417200	PF3D7_0417200.1	DHFR-TS	Plasmodium falciparum 3D7	Pf3D7_04_v3:747,897..750,065(+)	bifunctional dihydrofolate reductase-thymidylate synthase	protein coding gene	cytoplasm;cytosol;mitochondrion	RNA binding;thymidylate synthase activity	dTMP biosynthetic process;response to drug;response to xenobiotic stimulus	PF00186;PF00303
PF3D7_0417300	PF3D7_0417300.1	N/A	Plasmodium falciparum 3D7	Pf3D7_04_v3:750,307..753,786(-)	LETM1-like protein, putative	protein coding gene	Maurer's cleft;mitochondrion	N/A	cellular metal ion homeostasis	PF07766
PF3D7_0417400	PF3D7_0417400.1	N/A	Plasmodium falciparum 3D7	Pf3D7_04_v3:755,176..777,060(+)	conserved Plasmodium protein, unknown function	protein coding gene	N/A	N/A	N/A	N/A
PF3D7_0417500	PF3D7_0417500.1	N/A	Plasmodium falciparum 3D7	Pf3D7_04_v3:776,801..779,987(-)	memo-like protein	protein coding gene	nucleus	N/A	N/A	PF01875
PF3D7_0417600	PF3D7_0417600.1	N/A	Plasmodium falciparum 3D7	Pf3D7_04_v3:780,243..783,375(-)	conserved Plasmodium protein, unknown function	protein coding gene	N/A	N/A	N/A	N/A
PF3D7_0417700	PF3D7_0417700.1	N/A	Plasmodium falciparum 3D7	Pf3D7_04_v3:784,194..786,430(+)	conserved Plasmodium protein, unknown function	protein coding gene	N/A	N/A	N/A	N/A
PF3D7_0417800	PF3D7_0417800.1	CRK1	Plasmodium falciparum 3D7	Pf3D7_04_v3:786,700..790,000(-)	cdc2-related protein kinase 1	protein coding gene	nucleus	cyclin-dependent protein serine/threonine kinase activity;protein kinase activity	protein phosphorylation;regulation of gene expression;regulation of mitotic cell cycle	PF00069
PF3D7_0417900	PF3D7_0417900.1	N/A	Plasmodium falciparum 3D7	Pf3D7_04_v3:790,709..793,086(+)	conserved Plasmodium protein, unknown function	protein coding gene	N/A	N/A	N/A	N/A
PF3D7_0418000	PF3D7_0418000.1	N/A	Plasmodium falciparum 3D7	Pf3D7_04_v3:793,749..810,923(+)	conserved Plasmodium protein, unknown function	protein coding gene	endoplasmic reticulum membrane;nucleus	DNA-binding transcription factor activity;sequence-specific DNA binding	positive regulation of transcription, DNA-templated;protein autoprocessing	N/A
PF3D7_0418100	PF3D7_0418100.1	SOC1	Plasmodium falciparum 3D7	Pf3D7_04_v3:810,171..815,760(-)	protein SOC1, putative	protein coding gene	cytoplasm	protein phosphatase regulator activity	regulation of phosphoprotein phosphatase activity	PF04499
PF3D7_0418200	PF3D7_0418200.1	EIF3M	Plasmodium falciparum 3D7	Pf3D7_04_v3:816,141..818,999(+)	eukaryotic translation initiation factor 3 subunit M, putative	protein coding gene	eukaryotic translation initiation factor 3 complex;nucleus	translation initiation factor activity	cytoplasmic translational initiation	PF01399
PF3D7_0418300	PF3D7_0418300.1	N/A	Plasmodium falciparum 3D7	Pf3D7_04_v3:819,175..826,740(-)	conserved Plasmodium protein, unknown function	protein coding gene	nucleus	N/A	N/A	N/A
PF3D7_0418400	PF3D7_0418400.1	N/A	Plasmodium falciparum 3D7	Pf3D7_04_v3:829,728..830,676(+)	LSM domain-containing protein, putative	protein coding gene	N/A	N/A	N/A	N/A
PF3D7_0418500	PF3D7_0418500.1	BET3	Plasmodium falciparum 3D7	Pf3D7_04_v3:830,766..832,555(-)	trafficking protein particle complex subunit 3, putative	protein coding gene	Golgi apparatus;Maurer's cleft;TRAPP complex;cis-Golgi network membrane;cytosol	RNA binding	endoplasmic reticulum to Golgi vesicle-mediated transport;intra-Golgi vesicle-mediated transport	PF04051
PF3D7_0418600	PF3D7_0418600.1	N/A	Plasmodium falciparum 3D7	Pf3D7_04_v3:833,620..840,678(+)	regulator of chromosome condensation, putative	protein coding gene	cytosol	N/A	N/A	PF13540
PF3D7_0418700	PF3D7_0418700.1	N/A	Plasmodium falciparum 3D7	Pf3D7_04_v3:840,757..843,217(+)	RNA-binding protein NOB1, putative	protein coding gene	preribosome, small subunit precursor	endoribonuclease activity	maturation of SSU-rRNA	PF08772;PF17146
PF3D7_0418800	PF3D7_0418800.1	N/A	Plasmodium falciparum 3D7	Pf3D7_04_v3:843,562..845,169(+)	MOLO1 domain-containing protein, putative	protein coding gene	crystalloid	N/A	N/A	PF17175
PF3D7_0418900	PF3D7_0418900.1	N/A	Plasmodium falciparum 3D7	Pf3D7_04_v3:846,888..849,541(+)	conserved protein, unknown function	protein coding gene	N/A	N/A	N/A	N/A
PF3D7_0419000	PF3D7_0419000.1	N/A	Plasmodium falciparum 3D7	Pf3D7_04_v3:849,793..852,242(+)	conserved Plasmodium protein, unknown function	protein coding gene	axoneme	N/A	axonemal dynein complex assembly;cilium-dependent cell motility;regulation of cilium movement	N/A
PF3D7_0419100	PF3D7_0419100.1	N/A	Plasmodium falciparum 3D7	Pf3D7_04_v3:852,453..854,447(+)	conserved Plasmodium protein, unknown function	protein coding gene	N/A	N/A	N/A	N/A
PF3D7_0419200	PF3D7_0419200.1	GOT1	Plasmodium falciparum 3D7	Pf3D7_04_v3:854,493..855,667(+)	protein transport protein GOT1, putative	protein coding gene	N/A	N/A	N/A	PF04178
PF3D7_0419300	PF3D7_0419300.1	N/A	Plasmodium falciparum 3D7	Pf3D7_04_v3:854,488..857,207(-)	conserved Plasmodium protein, unknown function	protein coding gene	Rad51C-XRCC3 complex;replication fork	N/A	double-strand break repair via synthesis-dependent strand annealing;resolution of mitotic recombination intermediates;t-circle formation;telomere maintenance via recombination	PF08423
PF3D7_0419400	PF3D7_0419400.1	N/A	Plasmodium falciparum 3D7	Pf3D7_04_v3:857,875..866,312(+)	conserved Plasmodium protein, unknown function	protein coding gene	N/A	N/A	N/A	N/A
PF3D7_0419500	PF3D7_0419500.1	N/A	Plasmodium falciparum 3D7	Pf3D7_04_v3:866,388..869,784(-)	conserved Plasmodium membrane protein, unknown function	protein coding gene	N/A	N/A	N/A	N/A
PF3D7_0419600	PF3D7_0419600.1	RANBP1	Plasmodium falciparum 3D7	Pf3D7_04_v3:869,788..872,102(+)	ran-specific GTPase-activating protein 1, putative	protein coding gene	cytoplasm;nuclear pore;nucleus	GTP binding;GTPase activity	DNA replication;RNA export from nucleus;protein import into nucleus	PF00638
PF3D7_0419700	PF3D7_0419700.1	Pf34	Plasmodium falciparum 3D7	Pf3D7_04_v3:872,600..875,321(+)	apical merozoite protein	protein coding gene	anchored component of plasma membrane;rhoptry;rhoptry neck	N/A	N/A	N/A
PF3D7_0419800	PF3D7_0419800.1	N/A	Plasmodium falciparum 3D7	Pf3D7_04_v3:874,705..876,464(-)	60S ribosomal protein L7ae/L30e, putative	protein coding gene	box H/ACA snoRNP complex;nucleus;ribosome	RNA binding;box H/ACA snoRNA binding;structural constituent of ribosome	cleavage involved in rRNA processing;maturation of LSU-rRNA;rRNA pseudouridine synthesis;snRNA pseudouridine synthesis;translation	PF01248
PF3D7_0419900	PF3D7_0419900.1	N/A	Plasmodium falciparum 3D7	Pf3D7_04_v3:876,213..894,383(+)	phosphatidylinositol 4-kinase, putative	protein coding gene	cytoplasm;integral component of membrane;membrane	1-phosphatidylinositol 4-kinase activity;phosphatidylinositol kinase activity	phosphatidylinositol metabolic process;phosphatidylinositol phosphate biosynthetic process;phosphatidylinositol-mediated signaling	N/A
PF3D7_0420000	PF3D7_0420000.1	N/A	Plasmodium falciparum 3D7	Pf3D7_04_v3:893,948..906,047(-)	zinc finger protein, putative	protein coding gene	cytoplasm;membrane;nucleus	N/A	N/A	PF07496
PF3D7_0420100	PF3D7_0420100.1	RIO2	Plasmodium falciparum 3D7	Pf3D7_04_v3:906,263..909,398(+)	serine/threonine protein kinase RIO2	protein coding gene	cytosol;nucleus;preribosome, small subunit precursor	protein kinase activity	maturation of SSU-rRNA	PF01163;PF09202
PF3D7_0420200	PF3D7_0420200.1	ACPS	Plasmodium falciparum 3D7	Pf3D7_04_v3:909,409..912,119(+)	holo-[acyl-carrier-protein] synthase, putative	protein coding gene	apicoplast	transferase activity	fatty acid biosynthetic process	PF01648;PF02130
PF3D7_0420300	PF3D7_0420300.1	ApiAP2	Plasmodium falciparum 3D7	Pf3D7_04_v3:915,895..928,649(+)	AP2 domain transcription factor, putative	protein coding gene	nucleus	protein binding;sequence-specific DNA binding	N/A	PF00847
PF3D7_0420400	PF3D7_0420400.1	RRF2	Plasmodium falciparum 3D7	Pf3D7_04_v3:929,219..930,280(+)	ribosome-recycling factor	protein coding gene	cytosol;mitochondrion;nucleus	ribosomal large subunit binding	ribosome disassembly;translation	PF01765
PF3D7_0420500	PF3D7_0420500.1	N/A	Plasmodium falciparum 3D7	Pf3D7_04_v3:930,314..931,842(-)	conserved Plasmodium protein, unknown function	protein coding gene	N/A	N/A	N/A	N/A
PF3D7_0420600	PF3D7_0420600.1	N/A	Plasmodium falciparum 3D7	Pf3D7_04_v3:932,373..934,499(+)	conserved Plasmodium protein, unknown function	protein coding gene	N/A	N/A	N/A	N/A
PF3D7_0420700	PF3D7_0420700.1	VAR	Plasmodium falciparum 3D7	Pf3D7_04_v3:935,031..941,875(-)	erythrocyte membrane protein 1, PfEMP1	protein coding gene	host cell plasma membrane;infected host cell surface knob	cell adhesion molecule binding	antigenic variation;cell-cell adhesion;cytoadherence to microvasculature, mediated by symbiont protein;modulation by symbiont of host erythrocyte aggregation	PF03011;PF05424;PF15445;PF15447;PF18562
PF3D7_0420900	PF3D7_0420900.1	VAR	Plasmodium falciparum 3D7	Pf3D7_04_v3:946,169..953,773(-)	erythrocyte membrane protein 1, PfEMP1	protein coding gene	host cell plasma membrane;infected host cell surface knob	cell adhesion molecule binding	antigenic variation;cell-cell adhesion;cytoadherence to microvasculature, mediated by symbiont protein;modulation by symbiont of host erythrocyte aggregation	PF03011;PF05424;PF15445;PF15447;PF18562
PF3D7_0421100	PF3D7_0421100.1	VAR	Plasmodium falciparum 3D7	Pf3D7_04_v3:958,067..965,611(-)	erythrocyte membrane protein 1, PfEMP1	protein coding gene	host cell plasma membrane;infected host cell surface knob	cell adhesion molecule binding	antigenic variation;cell-cell adhesion;cytoadherence to microvasculature, mediated by symbiont protein;modulation by symbiont of host erythrocyte aggregation	PF03011;PF05424;PF15445;PF15447;PF18562
PF3D7_0421200	PF3D7_0421200.1	RIF	Plasmodium falciparum 3D7	Pf3D7_04_v3:967,087..968,273(+)	rifin	protein coding gene	host cell plasma membrane	N/A	antigenic variation	PF02009
PF3D7_0421300	PF3D7_0421300.1	VAR	Plasmodium falciparum 3D7	Pf3D7_04_v3:969,031..976,591(-)	erythrocyte membrane protein 1, PfEMP1	protein coding gene	host cell plasma membrane;infected host cell surface knob	cell adhesion molecule binding	antigenic variation;cell-cell adhesion;cytoadherence to microvasculature, mediated by symbiont protein;modulation by symbiont of host erythrocyte aggregation	PF03011;PF05424;PF15445;PF15447;PF18562
PF3D7_0421700	PF3D7_0421700.1	N/A	Plasmodium falciparum 3D7	Pf3D7_04_v3:987,842..994,360(-)	conserved Plasmodium protein, unknown function	protein coding gene	N/A	N/A	N/A	N/A
PF3D7_0421800	PF3D7_0421800.1	N/A	Plasmodium falciparum 3D7	Pf3D7_04_v3:995,998..996,252(+)	conserved Plasmodium protein, unknown function	protein coding gene	N/A	N/A	N/A	N/A
PF3D7_0421900	PF3D7_0421900.1	N/A	Plasmodium falciparum 3D7	Pf3D7_04_v3:997,240..997,455(+)	conserved Plasmodium protein, unknown function	protein coding gene	N/A	N/A	N/A	N/A
PF3D7_0422000	PF3D7_0422000.1	N/A	Plasmodium falciparum 3D7	Pf3D7_04_v3:997,886..1,000,908(+)	steroid dehydrogenase, putative	protein coding gene	N/A	oxidoreductase activity	fatty acid biosynthetic process	PF00106
PF3D7_0422100	PF3D7_0422100.1	N/A	Plasmodium falciparum 3D7	Pf3D7_04_v3:1,001,207..1,003,506(+)	transmembrane emp24 domain-containing protein, putative	protein coding gene	COPII-coated ER to Golgi transport vesicle;Golgi apparatus;apicoplast;endoplasmic reticulum;endoplasmic reticulum-Golgi intermediate compartment;nucleus	RNA binding;protein binding	Golgi organization;endoplasmic reticulum to Golgi vesicle-mediated transport;intracellular protein transport	PF01105
PF3D7_0422200	PF3D7_0422200.1	N/A	Plasmodium falciparum 3D7	Pf3D7_04_v3:1,003,768..1,018,837(-)	erythrocyte membrane-associated antigen	protein coding gene	N/A	N/A	N/A	N/A
PF3D7_0422300	PF3D7_0422300.1	N/A	Plasmodium falciparum 3D7	Pf3D7_04_v3:1,020,961..1,025,057(+)	alpha tubulin 2	protein coding gene	cytoplasm;microtubule;nucleus	GTP binding;structural constituent of cytoskeleton	microtubule cytoskeleton organization;microtubule-based process;mitotic cell cycle	PF00091;PF03953
PF3D7_0422400	PF3D7_0422400.1	RPS19	Plasmodium falciparum 3D7	Pf3D7_04_v3:1,025,510..1,027,735(+)	40S ribosomal protein S19	protein coding gene	cytosolic small ribosomal subunit;extracellular vesicle;nucleus	RNA binding;structural constituent of ribosome	ribosomal small subunit assembly;translation	PF01090
PF3D7_0422500	PF3D7_0422500.1	BRR2	Plasmodium falciparum 3D7	Pf3D7_04_v3:1,029,062..1,038,336(+)	pre-mRNA-splicing helicase BRR2, putative	protein coding gene	cytoplasmic stress granule;spliceosomal complex	RNA helicase activity;mRNA binding	RNA splicing, via transesterification reactions;regulation of translation	PF00270;PF00271;PF02889;PF18149
PF3D7_0422600	PF3D7_0422600.1	N/A	Plasmodium falciparum 3D7	Pf3D7_04_v3:1,038,409..1,039,295(-)	conserved Plasmodium protein, unknown function	protein coding gene	nucleus	N/A	N/A	N/A
PF3D7_0422700	PF3D7_0422700.1	EIF4A3	Plasmodium falciparum 3D7	Pf3D7_04_v3:1,039,634..1,041,812(+)	eukaryotic initiation factor 4A-III, putative	protein coding gene	catalytic step 2 spliceosome;eukaryotic translation initiation factor 4F complex;nucleolus;nucleus	RNA binding;RNA helicase activity;mRNA binding;translation initiation factor activity	regulation of translation;regulation of translational initiation	PF00270;PF00271
PF3D7_0422800	PF3D7_0422800.1	SR12	Plasmodium falciparum 3D7	Pf3D7_04_v3:1,042,564..1,044,896(+)	serpentine receptor 12, putative	protein coding gene	N/A	N/A	N/A	PF10192
PF3D7_0422900	PF3D7_0422900.1	N/A	Plasmodium falciparum 3D7	Pf3D7_04_v3:1,045,301..1,046,988(+)	methyltransferase, putative	protein coding gene	N/A	N/A	N/A	PF13489
PF3D7_0423000	PF3D7_0423000.1	N/A	Plasmodium falciparum 3D7	Pf3D7_04_v3:1,047,470..1,048,843(+)	conserved Plasmodium protein, unknown function	protein coding gene	N/A	N/A	N/A	N/A
PF3D7_0423100	PF3D7_0423100.1	N/A	Plasmodium falciparum 3D7	Pf3D7_04_v3:1,048,879..1,050,294(-)	AP-4 complex subunit sigma, putative	protein coding gene	intracellular membrane-bounded organelle;secretory granule;transport vesicle	N/A	vesicle-mediated transport	PF01217
PF3D7_0423200	PF3D7_0423200.1	N/A	Plasmodium falciparum 3D7	Pf3D7_04_v3:1,050,249..1,051,258(+)	BSD-domain protein, putative	protein coding gene	N/A	N/A	N/A	PF03909
PF3D7_0423300	PF3D7_0423300.1	N/A	Plasmodium falciparum 3D7	Pf3D7_04_v3:1,051,095..1,053,352(-)	conserved Plasmodium protein, unknown function	protein coding gene	N/A	N/A	N/A	N/A
PF3D7_0423400	PF3D7_0423400.1	AARP	Plasmodium falciparum 3D7	Pf3D7_04_v3:1,055,314..1,056,674(+)	apical asparagine-rich protein AARP	protein coding gene	apical part of cell;rhoptry;rhoptry neck	host cell surface receptor binding	cell-cell adhesion;entry into host	N/A
PF3D7_0423500	PF3D7_0423500.1	GAPM2	Plasmodium falciparum 3D7	Pf3D7_04_v3:1,058,888..1,061,603(+)	glideosome associated protein with multiple membrane spans 2	protein coding gene	cell surface;inner membrane pellicle complex;protein-containing complex	RNA binding;protein binding	entry into host	PF11677
PF3D7_0423600	PF3D7_0423600.1	N/A	Plasmodium falciparum 3D7	Pf3D7_04_v3:1,061,719..1,067,023(-)	conserved Plasmodium protein, unknown function	protein coding gene	N/A	N/A	N/A	N/A
PF3D7_0423700	PF3D7_0423700.1	ETRAMP4	Plasmodium falciparum 3D7	Pf3D7_04_v3:1,069,829..1,072,039(-)	early transcribed membrane protein 4	protein coding gene	symbiont-containing vacuole membrane	N/A	N/A	PF09716
PF3D7_0423800	PF3D7_0423800.1	CyRPA	Plasmodium falciparum 3D7	Pf3D7_04_v3:1,075,910..1,077,829(+)	cysteine-rich protective antigen	protein coding gene	anchored component of plasma membrane;apical part of cell;cell surface;host extracellular space;microneme;protein-containing complex	protein binding	entry into host	PF18638
PF3D7_0423900	PF3D7_0423900.1	N/A	Plasmodium falciparum 3D7	Pf3D7_04_v3:1,077,575..1,078,515(-)	probable protein, unknown function	protein coding gene	N/A	N/A	N/A	N/A
PF3D7_0424000	PF3D7_0424000.1	N/A	Plasmodium falciparum 3D7	Pf3D7_04_v3:1,080,176..1,082,321(+)	Plasmodium exported protein (PHISTc), unknown function	protein coding gene	Maurer's cleft	protein binding;protein-containing complex binding	N/A	PF09687
PF3D7_0424100	PF3D7_0424100.1	RH5	Plasmodium falciparum 3D7	Pf3D7_04_v3:1,082,005..1,084,464(-)	reticulocyte binding protein homologue 5	protein coding gene	apical part of cell;bicellular tight junction;cell surface;host cell membrane;host extracellular space;protein-containing complex;rhoptry;rhoptry lumen	heparin binding;host cell surface receptor binding;protein binding	entry into host;protein insertion into membrane	PF18515
PF3D7_0424200	PF3D7_0424200.1	RH4	Plasmodium falciparum 3D7	Pf3D7_04_v3:1,085,641..1,091,369(-)	reticulocyte binding protein homologue 4	protein coding gene	apical part of cell;rhoptry	heparin binding;host cell surface receptor binding	entry into host	N/A
PF3D7_0424400	PF3D7_0424400.1	SURF4.2	Plasmodium falciparum 3D7	Pf3D7_04_v3:1,099,303..1,107,445(+)	surface-associated interspersed protein 4.2 (SURFIN 4.2)	protein coding gene	Maurer's cleft;cell surface;host cell cytoplasm;host cell cytosol;host cell surface;rhoptry neck;symbiont-containing vacuole	actin binding;host cell surface binding;protein binding;spectrin binding	entry into host	N/A
PF3D7_0424500	PF3D7_0424500.1	FIKK4.1	Plasmodium falciparum 3D7	Pf3D7_04_v3:1,108,275..1,112,724(+)	serine/threonine protein kinase, FIKK family	protein coding gene	Maurer's cleft;cytoplasm;host cell periphery;nucleus	protein serine/threonine kinase activity	cytoadherence to microvasculature, mediated by symbiont protein;intracellular signal transduction;modulation by symbiont of host process;protein phosphorylation	PF00069
PF3D7_0424600	PF3D7_0424600.1	N/A	Plasmodium falciparum 3D7	Pf3D7_04_v3:1,112,736..1,117,250(-)	Plasmodium exported protein (PHISTb)	protein coding gene	extracellular vesicle;host cell periphery;host cell surface;nucleus	N/A	cytoadherence to microvasculature, mediated by symbiont protein	PF09687
PF3D7_0424700	PF3D7_0424700.1	FIKK4.2	Plasmodium falciparum 3D7	Pf3D7_04_v3:1,115,896..1,123,289(+)	serine/threonine protein kinase, FIKK family	protein coding gene	Maurer's cleft;cytoplasm;host cell cytoplasm;host cell periphery;nucleus	kinase activity;protein serine/threonine kinase activity	intracellular signal transduction;modulation by symbiont of host process;protein phosphorylation	N/A
PF3D7_0424800	PF3D7_0424800.1	N/A	Plasmodium falciparum 3D7	Pf3D7_04_v3:1,123,975..1,125,348(+)	Plasmodium exported protein (PHISTb), unknown function	protein coding gene	host cell	N/A	N/A	PF09687
PF3D7_0424900	PF3D7_0424900.1	N/A	Plasmodium falciparum 3D7	Pf3D7_04_v3:1,127,257..1,129,353(+)	Plasmodium exported protein (PHISTa), unknown function	protein coding gene	host cell	N/A	N/A	PF09687
PF3D7_0425100	PF3D7_0425100.1	N/A	Plasmodium falciparum 3D7	Pf3D7_04_v3:1,134,415..1,135,394(-)	Plasmodium exported protein (hyp6), unknown function	protein coding gene	host cell	N/A	N/A	PF09715
PF3D7_0425200	PF3D7_0425200.1	N/A	Plasmodium falciparum 3D7	Pf3D7_04_v3:1,136,443..1,137,793(+)	Plasmodium exported protein (hyp15), unknown function	protein coding gene	host cell	N/A	N/A	N/A
PF3D7_0425400	PF3D7_0425400.1	N/A	Plasmodium falciparum 3D7	Pf3D7_04_v3:1,143,992..1,144,824(+)	Plasmodium exported protein (PHISTa), unknown function	protein coding gene	host cell	N/A	N/A	PF09687
PF3D7_0425500	PF3D7_0425500.1	N/A	Plasmodium falciparum 3D7	Pf3D7_04_v3:1,146,672..1,147,697(-)	stevor	protein coding gene	Maurer's cleft	N/A	modulation by symbiont of host erythrocyte aggregation	PF17410
PF3D7_0425700	PF3D7_0425700.1	RIF	Plasmodium falciparum 3D7	Pf3D7_04_v3:1,152,504..1,153,633(-)	rifin	protein coding gene	Maurer's cleft;host cell plasma membrane;symbiont-containing vacuole	N/A	antigenic variation;cytoadherence to microvasculature, mediated by symbiont protein;modulation by symbiont of host erythrocyte aggregation	PF02009
PF3D7_0425800	PF3D7_0425800.1	VAR	Plasmodium falciparum 3D7	Pf3D7_04_v3:1,156,423..1,167,821(+)	erythrocyte membrane protein 1, PfEMP1	protein coding gene	host cell plasma membrane;infected host cell surface knob	cell adhesion molecule binding	antigenic variation;cell-cell adhesion;cytoadherence to microvasculature, mediated by symbiont protein;modulation by symbiont of host erythrocyte aggregation	PF03011;PF05424;PF15445;PF15447;PF18562
PF3D7_0425900	PF3D7_0425900.1	RIF	Plasmodium falciparum 3D7	Pf3D7_04_v3:1,169,521..1,171,286(+)	rifin	protein coding gene	Maurer's cleft;host cell plasma membrane;symbiont-containing vacuole	N/A	antigenic variation;cytoadherence to microvasculature, mediated by symbiont protein;modulation by symbiont of host erythrocyte aggregation	PF02009
PF3D7_0426000	PF3D7_0426000.1	VAR	Plasmodium falciparum 3D7	Pf3D7_04_v3:1,173,053..1,180,226(-)	erythrocyte membrane protein 1, PfEMP1	protein coding gene	host cell plasma membrane;infected host cell surface knob	cell adhesion molecule binding	antigenic variation;cell-cell adhesion;cytoadherence to microvasculature, mediated by symbiont protein;modulation by symbiont of host erythrocyte aggregation	PF03011;PF05424;PF15445;PF15447;PF18562
PF3D7_0500100	PF3D7_0500100.1	VAR	Plasmodium falciparum 3D7	Pf3D7_05_v3:20,929..28,456(+)	erythrocyte membrane protein 1, PfEMP1	protein coding gene	host cell plasma membrane;infected host cell surface knob	cell adhesion molecule binding	antigenic variation;cell-cell adhesion;cytoadherence to microvasculature, mediated by symbiont protein;modulation by symbiont of host erythrocyte aggregation	PF03011;PF05424;PF15445;PF15447;PF18562
PF3D7_0500400	PF3D7_0500400.1	RIF	Plasmodium falciparum 3D7	Pf3D7_05_v3:33,056..34,378(-)	rifin	protein coding gene	Maurer's cleft;host cell plasma membrane;symbiont-containing vacuole	N/A	antigenic variation;cytoadherence to microvasculature, mediated by symbiont protein;modulation by symbiont of host erythrocyte aggregation	PF02009
PF3D7_0500500	PF3D7_0500500.1	RIF	Plasmodium falciparum 3D7	Pf3D7_05_v3:36,464..37,564(-)	rifin	protein coding gene	host cell plasma membrane	N/A	antigenic variation	PF02009
PF3D7_0500800	PF3D7_0500800.1	MESA	Plasmodium falciparum 3D7	Pf3D7_05_v3:42,114..48,258(-)	mature parasite-infected erythrocyte surface antigen	protein coding gene	Maurer's cleft;host cell plasma membrane;infected host cell surface knob;nucleus	protein binding	N/A	PF00226;PF06513
PF3D7_0500900	PF3D7_0500900.1	FIKK5	Plasmodium falciparum 3D7	Pf3D7_05_v3:50,081..52,576(-)	serine/threonine protein kinase, FIKK family	protein coding gene	cytoplasm;nucleus	protein serine/threonine kinase activity	intracellular signal transduction;modulation by symbiont of host process;protein phosphorylation	PF00069
PF3D7_0501000	PF3D7_0501000.1	N/A	Plasmodium falciparum 3D7	Pf3D7_05_v3:55,122..57,159(+)	Plasmodium exported protein, unknown function	protein coding gene	Maurer's cleft;extracellular vesicle;nucleus	N/A	N/A	N/A
PF3D7_0501100	PF3D7_0501100.1	HSP40	Plasmodium falciparum 3D7	Pf3D7_05_v3:57,729..62,476(-)	co-chaperone J domain protein JDP	protein coding gene	cytosol;host cell cytosol	ATPase activator activity;chaperone binding;protein binding;unfolded protein binding	chaperone cofactor-dependent protein refolding;positive regulation of ATP-dependent activity	PF00226;PF01556
PF3D7_0501100	PF3D7_0501100.2	HSP40	Plasmodium falciparum 3D7	Pf3D7_05_v3:57,729..62,476(-)	heat shock protein 40, type II	protein coding gene	cytosol	chaperone binding;unfolded protein binding	chaperone cofactor-dependent protein refolding	PF00226;PF01556
PF3D7_0501200	PF3D7_0501200.1	PIESP2	Plasmodium falciparum 3D7	Pf3D7_05_v3:63,225..66,292(+)	parasite-infected erythrocyte surface protein	protein coding gene	Maurer's cleft;cell surface;host cell cytoplasm;host cell surface;nucleus	host cell surface binding;protein binding	N/A	N/A
PF3D7_0501300	PF3D7_0501300.1	SBP1	Plasmodium falciparum 3D7	Pf3D7_05_v3:67,224..70,944(+)	skeleton-binding protein 1	protein coding gene	Maurer's cleft;cytoplasm;extracellular vesicle;integral component of membrane;nucleus;symbiont-containing vacuolar space;symbiont-containing vacuole membrane	protein binding	protein transport	N/A
PF3D7_0501400	PF3D7_0501400.1	FIRA	Plasmodium falciparum 3D7	Pf3D7_05_v3:73,163..80,813(+)	interspersed repeat antigen	protein coding gene	Maurer's cleft;extracellular space	serine-type endopeptidase inhibitor activity	N/A	N/A
PF3D7_0501500	PF3D7_0501500.1	RAP3	Plasmodium falciparum 3D7	Pf3D7_05_v3:80,570..82,763(-)	rhoptry-associated protein 3	protein coding gene	extracellular vesicle;food vacuole;nucleus;rhoptry	RNA binding	N/A	N/A
PF3D7_0501600	PF3D7_0501600.1	RAP2	Plasmodium falciparum 3D7	Pf3D7_05_v3:83,760..85,512(-)	rhoptry-associated protein 2	protein coding gene	extracellular vesicle;food vacuole;nucleus;rhoptry	RNA binding;protein binding	entry into host	N/A
PF3D7_0501700	PF3D7_0501700.1	APC3	Plasmodium falciparum 3D7	Pf3D7_05_v3:86,820..89,201(-)	anaphase-promoting complex subunit 3, putative	protein coding gene	anaphase-promoting complex;cytoplasm	N/A	anaphase-promoting complex-dependent catabolic process;cell division;chromosome condensation;cytokinesis;metaphase/anaphase transition of mitotic cell cycle;positive regulation of mitotic metaphase/anaphase transition;protein ubiquitination	PF13181
PF3D7_0501800	PF3D7_0501800.1	CAF1A	Plasmodium falciparum 3D7	Pf3D7_05_v3:90,735..95,257(+)	chromatin assembly factor 1 subunit A	protein coding gene	HIR complex;nucleus	histone binding;protein binding;transcription corepressor activity	DNA replication-independent chromatin assembly;mitotic sister chromatid segregation;obsolete regulation of chromatin silencing	PF00400
PF3D7_0501900	PF3D7_0501900.1	TRAPPC13	Plasmodium falciparum 3D7	Pf3D7_05_v3:94,808..97,116(-)	trafficking protein particle complex subunit 13, putative	protein coding gene	N/A	N/A	N/A	PF06159
PF3D7_0502000	PF3D7_0502000.1	VPS11	Plasmodium falciparum 3D7	Pf3D7_05_v3:97,199..102,279(+)	vacuolar protein sorting-associated protein 11, putative	protein coding gene	HOPS complex;endosome;membrane;nucleus	protein-macromolecule adaptor activity;zinc ion binding	endosome organization;intracellular protein transport;regulation of SNARE complex assembly;vacuole organization;vesicle docking involved in exocytosis;vesicle-mediated transport	PF12451
PF3D7_0502100	PF3D7_0502100.1	N/A	Plasmodium falciparum 3D7	Pf3D7_05_v3:101,346..103,488(-)	HCNGP-like protein	protein coding gene	nucleus	N/A	N/A	PF07818
PF3D7_0502200	PF3D7_0502200.1	MPV17	Plasmodium falciparum 3D7	Pf3D7_05_v3:104,000..106,727(+)	protein Mpv17, putative	protein coding gene	cytoplasm;mitochondrial inner membrane;mitochondrion	N/A	N/A	PF04117
PF3D7_0502300	PF3D7_0502300.1	N/A	Plasmodium falciparum 3D7	Pf3D7_05_v3:106,583..108,202(-)	conserved Plasmodium protein, unknown function	protein coding gene	N/A	N/A	N/A	N/A
PF3D7_0502400	PF3D7_0502400.1	MSP8	Plasmodium falciparum 3D7	Pf3D7_05_v3:109,846..112,484(-)	merozoite surface protein 8	protein coding gene	Maurer's cleft;food vacuole;membrane;plasma membrane;symbiont-containing vacuole	N/A	N/A	PF12947
PF3D7_0502500	PF3D7_0502500.1	N/A	Plasmodium falciparum 3D7	Pf3D7_05_v3:114,149..115,933(+)	conserved Plasmodium protein, unknown function	protein coding gene	N/A	N/A	N/A	N/A
PF3D7_0502600	PF3D7_0502600.1	N/A	Plasmodium falciparum 3D7	Pf3D7_05_v3:116,198..120,058(-)	conserved Plasmodium protein, unknown function	protein coding gene	N/A	N/A	N/A	N/A
PF3D7_0502700	PF3D7_0502700.1	N/A	Plasmodium falciparum 3D7	Pf3D7_05_v3:120,060..121,732(-)	conserved protein, unknown function	protein coding gene	N/A	N/A	N/A	N/A
PF3D7_0502800	PF3D7_0502800.1	N/A	Plasmodium falciparum 3D7	Pf3D7_05_v3:122,377..123,300(+)	DnaJ protein, putative	protein coding gene	N/A	ATPase activator activity;ferrous iron binding	positive regulation of ATP-dependent activity	PF00226;PF05207
PF3D7_0502900	PF3D7_0502900.1	N/A	Plasmodium falciparum 3D7	Pf3D7_05_v3:122,938..124,276(-)	Tim10/DDP family zinc finger protein, putative	protein coding gene	mitochondrion;nucleus	N/A	N/A	PF02953
PF3D7_0503000	PF3D7_0503000.1	N/A	Plasmodium falciparum 3D7	Pf3D7_05_v3:125,012..126,861(+)	50S ribosomal protein L28, apicoplast, putative	protein coding gene	apicoplast;large ribosomal subunit;mitochondrial large ribosomal subunit	structural constituent of ribosome	translation	PF00830
PF3D7_0503100	PF3D7_0503100.1	IspE	Plasmodium falciparum 3D7	Pf3D7_05_v3:126,662..128,917(-)	4-diphosphocytidyl-2-C-methyl-D-erythritol kinase, putative	protein coding gene	apicoplast	4-(cytidine 5'-diphospho)-2-C-methyl-D-erythritol kinase activity	isoprenoid biosynthetic process	N/A
PF3D7_0503200	PF3D7_0503200.1	CDC6	Plasmodium falciparum 3D7	Pf3D7_05_v3:130,209..133,825(+)	cell division control protein 6, putative	protein coding gene	mitochondrion;nuclear origin of replication recognition complex	DNA replication origin binding	DNA replication initiation;mitotic DNA replication checkpoint signaling;mitotic cell cycle	PF00004
PF3D7_0503300	PF3D7_0503300.1	SRSF12	Plasmodium falciparum 3D7	Pf3D7_05_v3:134,119..137,344(-)	serine/arginine-rich splicing factor 12	protein coding gene	nucleus;spliceosomal complex	RNA binding;nucleic acid binding	RNA splicing	PF00076
PF3D7_0503400	PF3D7_0503400.1	ADF1	Plasmodium falciparum 3D7	Pf3D7_05_v3:139,481..142,206(+)	actin-depolymerizing factor 1	protein coding gene	actin cytoskeleton;cytoplasm;cytosol;nucleus	actin filament binding;actin monomer binding	actin cytoskeleton organization;actin filament depolymerization;actin filament severing;cell motility;cytoplasmic actin-based contraction involved in cell motility	PF00241
PF3D7_0503500	PF3D7_0503500.1	N/A	Plasmodium falciparum 3D7	Pf3D7_05_v3:142,470..145,987(-)	protein kinase, putative	protein coding gene	N/A	protein kinase activity	protein phosphorylation	N/A
PF3D7_0503600	PF3D7_0503600.1	MyoB	Plasmodium falciparum 3D7	Pf3D7_05_v3:146,352..150,733(-)	myosin B	protein coding gene	actin cytoskeleton;apical part of cell;cytoplasm;symbiont-containing vacuole membrane;vesicle	ATP binding;actin binding;actin filament binding;actin-dependent ATPase activity;microfilament motor activity;protein binding	actin filament organization;vesicle transport along actin filament	PF00063
PF3D7_0503800	PF3D7_0503800.1	RPL31	Plasmodium falciparum 3D7	Pf3D7_05_v3:151,316..153,014(-)	60S ribosomal protein L31	protein coding gene	cytosolic large ribosomal subunit;nucleus	structural constituent of ribosome	cytoplasmic translation;translation	PF01198
PF3D7_0503900	PF3D7_0503900.1	N/A	Plasmodium falciparum 3D7	Pf3D7_05_v3:153,455..156,762(-)	conserved Plasmodium protein, unknown function	protein coding gene	mitochondrion	N/A	N/A	N/A
PF3D7_0504000	PF3D7_0504000.1	ATPase3	Plasmodium falciparum 3D7	Pf3D7_05_v3:157,065..165,442(+)	cation transporting P-ATPase	protein coding gene	apicoplast;integral component of membrane;intracellular membrane-bounded organelle	P-type ion transporter activity	cation transport	PF00122
PF3D7_0504100	PF3D7_0504100.1	N/A	Plasmodium falciparum 3D7	Pf3D7_05_v3:165,089..166,846(-)	AN1-type zinc finger protein, putative	protein coding gene	N/A	zinc ion binding	N/A	PF01428
PF3D7_0504200	PF3D7_0504200.1	DDX27	Plasmodium falciparum 3D7	Pf3D7_05_v3:167,258..169,809(+)	ATP-dependent RNA helicase DDX27, putative	protein coding gene	apicoplast;catalytic step 2 spliceosome;nucleolus	RNA binding;RNA helicase activity;helicase activity;mRNA binding	N/A	PF00270;PF00271
PF3D7_0504300	PF3D7_0504300.1	N/A	Plasmodium falciparum 3D7	Pf3D7_05_v3:169,539..170,888(-)	conserved Plasmodium protein, unknown function	protein coding gene	N/A	N/A	N/A	N/A
PF3D7_0504400	PF3D7_0504400.1	N/A	Plasmodium falciparum 3D7	Pf3D7_05_v3:172,042..174,574(+)	ATP-dependent helicase, putative	protein coding gene	apicoplast;nucleolus	RNA binding;RNA helicase activity;helicase activity;protein binding	N/A	PF00270;PF00271;PF08152
PF3D7_0504500	PF3D7_0504500.1	N/A	Plasmodium falciparum 3D7	Pf3D7_05_v3:174,882..176,765(+)	MOLO1 domain-containing protein, putative	protein coding gene	crystalloid	N/A	N/A	PF17175
PF3D7_0504600	PF3D7_0504600.1	BCKDHB	Plasmodium falciparum 3D7	Pf3D7_05_v3:177,390..179,177(+)	2-oxoisovalerate dehydrogenase subunit beta, mitochondrial, putative	protein coding gene	mitochondrial alpha-ketoglutarate dehydrogenase complex;mitochondrial tricarboxylic acid cycle enzyme complex;mitochondrion	3-methyl-2-oxobutanoate dehydrogenase (2-methylpropanoyl-transferring) activity;alpha-ketoacid dehydrogenase activity	branched-chain amino acid catabolic process;response to nutrient;tricarboxylic acid cycle	PF02779;PF02780
PF3D7_0504700	PF3D7_0504700.1	CEP120	Plasmodium falciparum 3D7	Pf3D7_05_v3:179,898..187,747(+)	centrosomal protein CEP120, putative	protein coding gene	centrosome	N/A	N/A	N/A
PF3D7_0504800	PF3D7_0504800.1	N/A	Plasmodium falciparum 3D7	Pf3D7_05_v3:187,586..205,020(-)	conserved Plasmodium protein, unknown function	protein coding gene	nucleolus;nucleus	N/A	N/A	N/A
PF3D7_0504900	PF3D7_0504900.1	N/A	Plasmodium falciparum 3D7	Pf3D7_05_v3:206,397..208,680(+)	transmembrane protein TMEM222, putative	protein coding gene	N/A	N/A	N/A	PF05608
PF3D7_0505000	PF3D7_0505000.1	N/A	Plasmodium falciparum 3D7	Pf3D7_05_v3:208,676..219,273(-)	MMS19-like protein, putative	protein coding gene	mitochondrial inner membrane	N/A	cristae formation;mitochondrial fusion;mitochondrial protein processing;protein-containing complex assembly	PF14500
PF3D7_0505100	PF3D7_0505100.1	TRS85	Plasmodium falciparum 3D7	Pf3D7_05_v3:219,562..230,001(+)	trafficking protein particle complex subunit 8, putative	protein coding gene	TRAPPIII protein complex;cytoplasmic vesicle;nucleus;phagophore assembly site	N/A	autophagosome assembly;autophagy of peroxisome;endoplasmic reticulum to Golgi vesicle-mediated transport;protein localization to phagophore assembly site	PF12739
PF3D7_0505200	PF3D7_0505200.1	ALP2b	Plasmodium falciparum 3D7	Pf3D7_05_v3:230,206..232,507(+)	actin-like protein, putative	protein coding gene	NuA4 histone acetyltransferase complex;SWI/SNF complex;actin cytoskeleton;nucleus	chromatin binding;structural constituent of cytoskeleton	ATP-dependent chromatin remodeling;cytoskeleton organization;histone H4 acetylation;regulation of transcription by RNA polymerase II	PF00022
PF3D7_0505300	PF3D7_0505300.1	N/A	Plasmodium falciparum 3D7	Pf3D7_05_v3:233,139..235,836(+)	UDP-N-acetylglucosamine transporter, putative	protein coding gene	Golgi apparatus;integral component of Golgi membrane	sialic acid transmembrane transporter activity	N/A	PF04142
PF3D7_0505400	PF3D7_0505400.1	N/A	Plasmodium falciparum 3D7	Pf3D7_05_v3:235,735..238,864(-)	conserved protein, unknown function	protein coding gene	apicoplast	N/A	N/A	N/A
PF3D7_0505500	PF3D7_0505500.1	MSH6	Plasmodium falciparum 3D7	Pf3D7_05_v3:238,878..243,954(-)	DNA mismatch repair protein MSH6, putative	protein coding gene	MutSalpha complex;mismatch repair complex;nucleus	ATP-dependent activity, acting on DNA;damaged DNA binding;four-way junction DNA binding;mismatched DNA binding	DNA repair;interstrand cross-link repair;maintenance of DNA repeat elements;meiotic mismatch repair;mismatch repair;negative regulation of DNA recombination;pyrimidine dimer repair	PF00488;PF01624;PF05190;PF05192
PF3D7_0505600	PF3D7_0505600.1	N/A	Plasmodium falciparum 3D7	Pf3D7_05_v3:245,653..247,093(+)	BCNT domain-containing protein, putative	protein coding gene	nucleus	N/A	N/A	PF07572
PF3D7_0505700	PF3D7_0505700.1	N/A	Plasmodium falciparum 3D7	Pf3D7_05_v3:247,142..250,905(-)	conserved Plasmodium membrane protein, unknown function	protein coding gene	apicoplast	N/A	N/A	N/A
PF3D7_0505800	PF3D7_0505800.1	SUMO	Plasmodium falciparum 3D7	Pf3D7_05_v3:251,337..253,815(-)	small ubiquitin-related modifier	protein coding gene	nucleus	protein tag;ubiquitin-like protein ligase binding	modification-dependent protein catabolic process;protein sumoylation;ubiquitin-dependent protein catabolic process	PF11976
PF3D7_0505900	PF3D7_0505900.1	MED11	Plasmodium falciparum 3D7	Pf3D7_05_v3:254,058..256,048(-)	mediator of RNA polymerase II transcription subunit 11, putative	protein coding gene	mediator complex	N/A	N/A	N/A
PF3D7_0506000	PF3D7_0506000.1	N/A	Plasmodium falciparum 3D7	Pf3D7_05_v3:256,063..257,694(+)	conserved Plasmodium protein, unknown function	protein coding gene	N/A	N/A	N/A	N/A
PF3D7_0506100	PF3D7_0506100.1	N/A	Plasmodium falciparum 3D7	Pf3D7_05_v3:256,330..259,207(-)	60S ribosomal subunit protein L24, putative	protein coding gene	cytosolic large ribosomal subunit;large ribosomal subunit	RNA binding;structural constituent of ribosome	assembly of large subunit precursor of preribosome;ribosomal large subunit assembly;translation	PF01246
PF3D7_0506200	PF3D7_0506200.1	TBP	Plasmodium falciparum 3D7	Pf3D7_05_v3:259,462..260,835(+)	TATA-box-binding protein	protein coding gene	nucleus;transcription factor TFIID complex	RNA polymerase II general transcription initiation factor activity	DNA-templated transcription, initiation;transcription by RNA polymerase II	PF00352
PF3D7_0506300	PF3D7_0506300.1	N/A	Plasmodium falciparum 3D7	Pf3D7_05_v3:260,639..262,284(-)	conserved protein, unknown function	protein coding gene	N/A	alkylbase DNA N-glycosylase activity	base-excision repair	N/A
PF3D7_0506400	PF3D7_0506400.1	N/A	Plasmodium falciparum 3D7	Pf3D7_05_v3:262,672..263,925(-)	conserved Plasmodium protein, unknown function	protein coding gene	N/A	N/A	N/A	N/A
PF3D7_0506500	PF3D7_0506500.1	N/A	Plasmodium falciparum 3D7	Pf3D7_05_v3:264,456..278,345(+)	conserved Plasmodium protein, unknown function	protein coding gene	N/A	N/A	N/A	N/A
PF3D7_0506700	PF3D7_0506700.1	N/A	Plasmodium falciparum 3D7	Pf3D7_05_v3:280,493..283,639(+)	GTPase-activating protein, putative	protein coding gene	N/A	GTPase activator activity	activation of GTPase activity;intracellular protein transport	PF00566
PF3D7_0506800	PF3D7_0506800.1	TCF25	Plasmodium falciparum 3D7	Pf3D7_05_v3:283,669..288,351(+)	transcription factor 25, putative	protein coding gene	nucleus	N/A	N/A	PF04910
PF3D7_0506900	PF3D7_0506900.1	ROM4	Plasmodium falciparum 3D7	Pf3D7_05_v3:288,024..291,540(-)	rhomboid protease ROM4	protein coding gene	cell surface;plasma membrane	peptidase activity	signal peptide processing	PF01694
PF3D7_0507000	PF3D7_0507000.1	N/A	Plasmodium falciparum 3D7	Pf3D7_05_v3:292,305..294,463(-)	conserved protein, unknown function	protein coding gene	mitochondrion	N/A	N/A	N/A
PF3D7_0507100	PF3D7_0507100.1	RPL4	Plasmodium falciparum 3D7	Pf3D7_05_v3:294,476..297,505(-)	60S ribosomal protein L4	protein coding gene	cytosolic large ribosomal subunit;nucleus	RNA binding;structural constituent of ribosome	translation	PF00573;PF14374
PF3D7_0507200	PF3D7_0507200.1	SUB3	Plasmodium falciparum 3D7	Pf3D7_05_v3:298,070..301,000(-)	subtilisin-like protease 3	protein coding gene	apicoplast;cytoplasm;extracellular space;membrane	protein binding;serine-type endopeptidase activity	protein processing;proteolysis	PF00082
PF3D7_0507300	PF3D7_0507300.1	SOPT	Plasmodium falciparum 3D7	Pf3D7_05_v3:301,508..305,191(-)	subtilisin-like ookinete protein SOPT	protein coding gene	Maurer's cleft;cell periphery;cell surface	N/A	entry into host	N/A
PF3D7_0507400	PF3D7_0507400.1	SUB1-ProM	Plasmodium falciparum 3D7	Pf3D7_05_v3:305,282..306,963(-)	subtilisin propeptide-like protein	protein coding gene	symbiont-containing vacuole	peptidase inhibitor activity;serine-type endopeptidase inhibitor activity	negative regulation of endopeptidase activity	N/A
PF3D7_0507500	PF3D7_0507500.1	SUB1	Plasmodium falciparum 3D7	Pf3D7_05_v3:307,090..310,120(-)	subtilisin-like protease 1	protein coding gene	exoneme;membrane;merozoite dense granule;symbiont-containing vacuolar space;symbiont-containing vacuole	serine-type endopeptidase activity;serine-type peptidase activity	exit from host cell;membrane protein ectodomain proteolysis;protein processing;proteolysis;response to xenobiotic stimulus	PF00082;PF18213
PF3D7_0507600	PF3D7_0507600.1	CAF40	Plasmodium falciparum 3D7	Pf3D7_05_v3:311,816..315,368(+)	protein CAF40, putative	protein coding gene	CCR4-NOT complex;CCR4-NOT core complex;P-body;nucleus	N/A	cell differentiation;negative regulation of translation	PF04078
PF3D7_0507700	PF3D7_0507700.1	NPL4	Plasmodium falciparum 3D7	Pf3D7_05_v3:316,610..319,032(-)	nuclear protein localization protein 4, putative	protein coding gene	nucleus	ubiquitin binding;ubiquitin protein ligase binding	ubiquitin-dependent ERAD pathway;ubiquitin-dependent protein catabolic process	PF05020;PF05021;PF11543
PF3D7_0507800	PF3D7_0507800.1	N/A	Plasmodium falciparum 3D7	Pf3D7_05_v3:320,839..327,413(+)	conserved protein, unknown function	protein coding gene	N/A	N/A	N/A	N/A
PF3D7_0507900	PF3D7_0507900.1	N/A	Plasmodium falciparum 3D7	Pf3D7_05_v3:327,656..328,316(+)	conserved Plasmodium protein, unknown function	protein coding gene	N/A	N/A	N/A	N/A
PF3D7_0508000	PF3D7_0508000.1	P38	Plasmodium falciparum 3D7	Pf3D7_05_v3:328,346..330,436(-)	6-cysteine protein	protein coding gene	anchored component of plasma membrane;cell surface;microneme	host cell surface binding;protein binding	entry into host	PF07422
PF3D7_0508100	PF3D7_0508100.1	SET9	Plasmodium falciparum 3D7	Pf3D7_05_v3:331,618..337,242(+)	SET domain protein, putative	protein coding gene	nucleus	N/A	N/A	PF12796
PF3D7_0508200	PF3D7_0508200.1	N/A	Plasmodium falciparum 3D7	Pf3D7_05_v3:336,882..340,121(-)	longevity-assurance (LAG1) protein, putative	protein coding gene	Maurer's cleft;apicoplast;cell surface;endoplasmic reticulum	N-acyltransferase activity	N/A	PF03798
PF3D7_0508300	PF3D7_0508300.1	TPT	Plasmodium falciparum 3D7	Pf3D7_05_v3:340,652..344,452(+)	triose phosphate transporter	protein coding gene	Golgi apparatus;apicoplast;integral component of plastid outer membrane;membrane	GDP-fucose transmembrane transporter activity;antiporter activity;nucleotide-sugar transmembrane transporter activity;transmembrane transporter activity	glucose import	PF03151
PF3D7_0508400	PF3D7_0508400.1	N/A	Plasmodium falciparum 3D7	Pf3D7_05_v3:344,931..346,744(+)	conserved protein, unknown function	protein coding gene	ciliary basal body;motile cilium;transcription factor TFIIIB complex	N/A	cilium assembly;positive regulation of cell motility;regulation of cilium beat frequency involved in ciliary motility;transcription by RNA polymerase II	PF05018
PF3D7_0508500	PF3D7_0508500.1	ND6	Plasmodium falciparum 3D7	Pf3D7_05_v3:346,728..355,169(-)	ND6 protein, putative	protein coding gene	apical part of cell;cytoplasm;nucleus	N/A	DNA packaging	PF00415;PF13540
PF3D7_0508600	PF3D7_0508600.1	N/A	Plasmodium falciparum 3D7	Pf3D7_05_v3:355,948..357,049(+)	conserved protein, unknown function	protein coding gene	N/A	N/A	N/A	N/A
PF3D7_0508700	PF3D7_0508700.1	PRP5	Plasmodium falciparum 3D7	Pf3D7_05_v3:358,035..362,825(+)	pre-mRNA-processing ATP-dependent RNA helicase PRP5, putative	protein coding gene	nucleus	ATP-dependent activity, acting on RNA;RNA helicase activity	mRNA splicing, via spliceosome	PF00270;PF00271
PF3D7_0508800	PF3D7_0508800.1	SSB	Plasmodium falciparum 3D7	Pf3D7_05_v3:362,856..365,744(-)	single-stranded DNA-binding protein	protein coding gene	apicoplast;mitochondrial nucleoid;mitochondrion;nucleoid;nucleus	protein binding;single-stranded DNA binding	mitochondrial DNA replication;positive regulation of helicase activity	PF00436
PF3D7_0508900	PF3D7_0508900.1	AAP6	Plasmodium falciparum 3D7	Pf3D7_05_v3:366,627..376,779(+)	protein AAP6	protein coding gene	apical part of cell;nucleus	N/A	N/A	N/A
PF3D7_0509000	PF3D7_0509000.1	alphaSNAP	Plasmodium falciparum 3D7	Pf3D7_05_v3:376,542..379,117(-)	alpha-soluble NSF attachment protein, putative	protein coding gene	Golgi apparatus;SNARE complex;endoplasmic reticulum;vacuolar membrane	soluble NSF attachment protein activity;syntaxin binding	SNARE complex disassembly;intracellular protein transport	PF14938
PF3D7_0509100	PF3D7_0509100.1	SMC4	Plasmodium falciparum 3D7	Pf3D7_05_v3:380,595..386,806(+)	structural maintenance of chromosomes protein 4, putative	protein coding gene	chromosome, centromeric region;condensin complex;nucleus	N/A	mitotic chromosome condensation	PF02463;PF06470
PF3D7_0509200	PF3D7_0509200.1	LRR2	Plasmodium falciparum 3D7	Pf3D7_05_v3:386,956..388,505(+)	leucine-rich repeat protein	protein coding gene	cytoplasm	cytoskeletal motor activity	N/A	N/A
PF3D7_0509300	PF3D7_0509300.1	N/A	Plasmodium falciparum 3D7	Pf3D7_05_v3:388,184..389,809(-)	conserved Plasmodium protein, unknown function	protein coding gene	nucleus	N/A	N/A	N/A
PF3D7_0509400	PF3D7_0509400.1	RNAPI	Plasmodium falciparum 3D7	Pf3D7_05_v3:389,815..399,902(-)	RNA polymerase I	protein coding gene	RNA polymerase I complex;nucleolus	N/A	N/A	PF00623;PF04983;PF04998;PF05000
PF3D7_0509500	PF3D7_0509500.1	N/A	Plasmodium falciparum 3D7	Pf3D7_05_v3:401,124..402,771(+)	ERCC4 domain-containing protein, putative	protein coding gene	Holliday junction resolvase complex;nucleus	3'-flap endonuclease activity	double-strand break repair via break-induced replication;mitotic intra-S DNA damage checkpoint signaling;resolution of meiotic recombination intermediates	PF02732
PF3D7_0509600	PF3D7_0509600.1	AsnRS	Plasmodium falciparum 3D7	Pf3D7_05_v3:402,908..405,758(+)	asparagine--tRNA ligase	protein coding gene	apicoplast	asparagine-tRNA ligase activity	asparaginyl-tRNA aminoacylation	PF00152;PF01336
PF3D7_0509700	PF3D7_0509700.1	N/A	Plasmodium falciparum 3D7	Pf3D7_05_v3:405,961..407,897(-)	conserved Plasmodium protein, unknown function	protein coding gene	N/A	N/A	N/A	N/A
PF3D7_0509800	PF3D7_0509800.1	PI4KB	Plasmodium falciparum 3D7	Pf3D7_05_v3:409,403..415,758(+)	phosphatidylinositol 4-kinase beta	protein coding gene	cytoplasm;membrane	1-phosphatidylinositol 4-kinase activity;phosphatidylinositol kinase activity	phosphatidylinositol biosynthetic process;phosphatidylinositol metabolic process;phosphatidylinositol phosphate biosynthetic process;phosphatidylinositol-mediated signaling;response to drug;response to xenobiotic stimulus	PF00454
PF3D7_0509900	PF3D7_0509900.1	N/A	Plasmodium falciparum 3D7	Pf3D7_05_v3:415,972..417,680(+)	NSE4 domain-containing protein, putative	protein coding gene	N/A	N/A	N/A	PF08743
PF3D7_0510000	PF3D7_0510000.1	N/A	Plasmodium falciparum 3D7	Pf3D7_05_v3:417,823..422,380(+)	conserved Plasmodium protein, unknown function	protein coding gene	N/A	histone binding	N/A	N/A
PF3D7_0510100	PF3D7_0510100.1	N/A	Plasmodium falciparum 3D7	Pf3D7_05_v3:421,563..431,426(-)	KH domain-containing protein, putative	protein coding gene	nucleus	RNA binding	N/A	N/A
PF3D7_0510200	PF3D7_0510200.1	CYP87	Plasmodium falciparum 3D7	Pf3D7_05_v3:436,017..439,924(+)	peptidyl-prolyl cis-trans isomerase	protein coding gene	N/A	cyclosporin A binding;peptidyl-prolyl cis-trans isomerase activity	protein folding;protein peptidyl-prolyl isomerization	PF00160
PF3D7_0510300	PF3D7_0510300.1	SIP	Plasmodium falciparum 3D7	Pf3D7_05_v3:440,724..442,007(-)	stripes inner membrane complex protein, putative	protein coding gene	cell periphery;inner membrane pellicle complex	N/A	N/A	N/A
PF3D7_0510400	PF3D7_0510400.1	N/A	Plasmodium falciparum 3D7	Pf3D7_05_v3:443,533..445,913(+)	PDCD2 domain-containing protein, putative	protein coding gene	N/A	N/A	N/A	PF04194
PF3D7_0510500	PF3D7_0510500.1	TopoI	Plasmodium falciparum 3D7	Pf3D7_05_v3:445,554..448,872(-)	topoisomerase I	protein coding gene	nucleolus;nucleus;replication fork protection complex	DNA topoisomerase type I (single strand cut, ATP-independent) activity	DNA replication;DNA topological change;chromatin remodeling;chromosome segregation;response to drug;response to xenobiotic stimulus	PF01028;PF02919;PF14370
PF3D7_0510700	PF3D7_0510700.1	N/A	Plasmodium falciparum 3D7	Pf3D7_05_v3:459,301..460,344(+)	conserved Plasmodium protein, unknown function	protein coding gene	N/A	N/A	N/A	N/A
PF3D7_0510800	PF3D7_0510800.1	N/A	Plasmodium falciparum 3D7	Pf3D7_05_v3:461,017..464,399(+)	WD repeat-containing protein, putative	protein coding gene	N/A	N/A	N/A	PF00400
PF3D7_0511000	PF3D7_0511000.1	TCTP	Plasmodium falciparum 3D7	Pf3D7_05_v3:467,139..468,451(-)	translationally-controlled tumor protein homolog	protein coding gene	cytoplasm;food vacuole	calcium ion binding	negative regulation of interleukin-6 production	PF00838
PF3D7_0511100	PF3D7_0511100.1	N/A	Plasmodium falciparum 3D7	Pf3D7_05_v3:468,884..470,250(+)	conserved Plasmodium protein, unknown function	protein coding gene	N/A	N/A	N/A	N/A
PF3D7_0511200	PF3D7_0511200.1	SCD	Plasmodium falciparum 3D7	Pf3D7_05_v3:470,506..474,400(+)	stearoyl-CoA desaturase	protein coding gene	endoplasmic reticulum;endoplasmic reticulum membrane;integral component of membrane	iron ion binding;stearoyl-CoA 9-desaturase activity	fatty acid biosynthetic process;unsaturated fatty acid biosynthetic process	N/A
PF3D7_0511300	PF3D7_0511300.1	N/A	Plasmodium falciparum 3D7	Pf3D7_05_v3:474,407..478,999(-)	MORN repeat protein, putative	protein coding gene	symbiont-containing vacuole membrane	N/A	N/A	PF02493;PF09794
PF3D7_0511400	PF3D7_0511400.1	N/A	Plasmodium falciparum 3D7	Pf3D7_05_v3:481,423..482,568(+)	conserved Plasmodium protein, unknown function	protein coding gene	cell surface	N/A	N/A	N/A
PF3D7_0511500	PF3D7_0511500.1	N/A	Plasmodium falciparum 3D7	Pf3D7_05_v3:484,937..517,423(+)	RNA pseudouridylate synthase, putative	protein coding gene	nucleus	mRNA binding	N/A	N/A
PF3D7_0511600	PF3D7_0511600.1	ARNP	Plasmodium falciparum 3D7	Pf3D7_05_v3:517,088..518,520(-)	apical rhoptry neck protein	protein coding gene	rhoptry neck	N/A	N/A	N/A
PF3D7_0511700	PF3D7_0511700.1	CGI121	Plasmodium falciparum 3D7	Pf3D7_05_v3:518,405..520,655(+)	EKC/KEOPS complex subunit CGI121	protein coding gene	EKC/KEOPS complex;cytoplasm	protein binding	N/A	PF08617
PF3D7_0511800	PF3D7_0511800.1	INO1	Plasmodium falciparum 3D7	Pf3D7_05_v3:520,131..522,996(-)	inositol-3-phosphate synthase	protein coding gene	cytoplasm	inositol-3-phosphate synthase activity	inositol biosynthetic process	PF01658;PF07994
PF3D7_0511900	PF3D7_0511900.1	N/A	Plasmodium falciparum 3D7	Pf3D7_05_v3:524,501..527,218(+)	conserved Plasmodium protein, unknown function	protein coding gene	N/A	N/A	N/A	N/A
PF3D7_0512000	PF3D7_0512000.1	PFD6	Plasmodium falciparum 3D7	Pf3D7_05_v3:527,485..528,969(+)	prefoldin subunit 6	protein coding gene	cytoplasm;prefoldin complex;symbiont-containing vacuole membrane	chaperone binding;protein binding	chaperone-mediated protein complex assembly;protein folding	PF01920
PF3D7_0512100	PF3D7_0512100.1	N/A	Plasmodium falciparum 3D7	Pf3D7_05_v3:528,729..529,510(-)	conserved protein, unknown function	protein coding gene	N/A	N/A	N/A	N/A
PF3D7_0512200	PF3D7_0512200.1	GS	Plasmodium falciparum 3D7	Pf3D7_05_v3:529,629..532,277(-)	glutathione synthetase	protein coding gene	cytosol;nucleus	ATP binding;glutathione binding;glutathione synthase activity	glutathione biosynthetic process;response to oxidative stress	PF03199;PF03917
PF3D7_0512300	PF3D7_0512300.1	MAT1	Plasmodium falciparum 3D7	Pf3D7_05_v3:532,825..534,881(-)	CDK-activating kinase assembly factor MAT1	protein coding gene	nucleus;transcription factor TFIIH holo complex	protein binding	DNA repair;activation of protein kinase activity;regulation of cyclin-dependent protein serine/threonine kinase activity;regulation of transcription by RNA polymerase II	PF00097;PF06391
PF3D7_0512400	PF3D7_0512400.1	N/A	Plasmodium falciparum 3D7	Pf3D7_05_v3:536,273..536,977(+)	conserved Plasmodium protein, unknown function	protein coding gene	N/A	N/A	N/A	N/A
PF3D7_0512500	PF3D7_0512500.1	N/A	Plasmodium falciparum 3D7	Pf3D7_05_v3:539,571..543,685(-)	conserved Plasmodium protein, unknown function	protein coding gene	N/A	N/A	N/A	N/A
PF3D7_0512600	PF3D7_0512600.1	RAB1b	Plasmodium falciparum 3D7	Pf3D7_05_v3:543,951..546,564(+)	ras-related protein Rab-1B	protein coding gene	Maurer's cleft;cis-Golgi network;endoplasmic reticulum;endoplasmic reticulum-Golgi intermediate compartment;food vacuole	protein binding	protein transport	PF00071
PF3D7_0512700	PF3D7_0512700.1	OPRT	Plasmodium falciparum 3D7	Pf3D7_05_v3:546,264..547,814(-)	orotate phosphoribosyltransferase	protein coding gene	cytoplasm;nucleus	orotate phosphoribosyltransferase activity;protein binding;protein dimerization activity	'de novo' pyrimidine nucleobase biosynthetic process;pyrimidine nucleotide biosynthetic process;pyrimidine ribonucleoside biosynthetic process	PF00156
PF3D7_0512800	PF3D7_0512800.1	N/A	Plasmodium falciparum 3D7	Pf3D7_05_v3:548,139..553,825(-)	conserved Plasmodium protein, unknown function	protein coding gene	N/A	N/A	N/A	N/A
PF3D7_0512900	PF3D7_0512900.1	AKAL	Plasmodium falciparum 3D7	Pf3D7_05_v3:553,939..554,787(+)	AKAP-like protein	protein coding gene	cytoplasm;cytosol;nucleus	AMP binding;protein binding;protein kinase A regulatory subunit binding	regulation of protein kinase A signaling	PF10469
PF3D7_0513000	PF3D7_0513000.1	N/A	Plasmodium falciparum 3D7	Pf3D7_05_v3:555,264..556,651(+)	conserved protein, unknown function	protein coding gene	N/A	N/A	N/A	N/A
PF3D7_0513100	PF3D7_0513100.1	N/A	Plasmodium falciparum 3D7	Pf3D7_05_v3:556,685..558,060(-)	conserved protein, unknown function	protein coding gene	cytosol	N/A	N/A	N/A
PF3D7_0513200	PF3D7_0513200.1	N/A	Plasmodium falciparum 3D7	Pf3D7_05_v3:559,099..569,049(+)	CPSF domain-containing protein, putative	protein coding gene	TRAMP complex;nucleolus	polynucleotide adenylyltransferase activity	histone mRNA catabolic process;sno(s)RNA polyadenylation	PF03178
PF3D7_0513300	PF3D7_0513300.1	PNP	Plasmodium falciparum 3D7	Pf3D7_05_v3:568,594..570,527(-)	purine nucleoside phosphorylase	protein coding gene	N/A	purine-nucleoside phosphorylase activity	inosine catabolic process;purine nucleoside catabolic process;response to xenobiotic stimulus	PF01048
PF3D7_0513400	PF3D7_0513400.1	YihA1	Plasmodium falciparum 3D7	Pf3D7_05_v3:570,684..572,743(-)	GTP-binding protein YihA1	protein coding gene	apicoplast;mitochondrion	GTPase activity;guanyl nucleotide binding;ribosome binding	N/A	PF01926
PF3D7_0513500	PF3D7_0513500.1	PAM16	Plasmodium falciparum 3D7	Pf3D7_05_v3:573,224..574,334(+)	mitochondrial import inner membrane translocase subunit TIM16, putative	protein coding gene	TIM23 mitochondrial import inner membrane translocase complex;mitochondrion	N/A	protein import into mitochondrial matrix	N/A
PF3D7_0513600	PF3D7_0513600.1	N/A	Plasmodium falciparum 3D7	Pf3D7_05_v3:574,365..579,453(-)	deoxyribodipyrimidine photo-lyase, putative	protein coding gene	nucleus	deoxyribodipyrimidine photo-lyase activity	DNA repair;photoreactive repair	PF00875
PF3D7_0513700	PF3D7_0513700.1	PSOP12	Plasmodium falciparum 3D7	Pf3D7_05_v3:580,815..584,424(+)	secreted ookinete protein, putative	protein coding gene	cell surface	N/A	N/A	PF18638
PF3D7_0513800	PF3D7_0513800.1	RAB1a	Plasmodium falciparum 3D7	Pf3D7_05_v3:584,878..586,032(-)	ras-related protein Rab-1A	protein coding gene	endomembrane system;endoplasmic reticulum;endoplasmic reticulum-Golgi intermediate compartment;rhoptry	GTPase activity	intracellular protein transport	PF00071
PF3D7_0513900	PF3D7_0513900.1	N/A	Plasmodium falciparum 3D7	Pf3D7_05_v3:587,509..588,764(+)	conserved protein, unknown function	protein coding gene	mitochondrion	N/A	N/A	N/A
PF3D7_0514000	PF3D7_0514000.1	TTL	Plasmodium falciparum 3D7	Pf3D7_05_v3:588,921..590,809(-)	tubulin--tyrosine ligase, putative	protein coding gene	cilium;mitochondrion	tubulin binding;tubulin-glutamic acid ligase activity	microtubule cytoskeleton organization;protein polyglutamylation	PF03133
PF3D7_0514100	PF3D7_0514100.1	UvrD	Plasmodium falciparum 3D7	Pf3D7_05_v3:591,098..595,679(-)	ATP-dependent DNA helicase UvrD	protein coding gene	nucleus	3'-5' DNA helicase activity;protein binding;single-stranded DNA helicase activity	DNA repair;recombinational repair	PF00580;PF13361
PF3D7_0514200	PF3D7_0514200.1	N/A	Plasmodium falciparum 3D7	Pf3D7_05_v3:596,622..599,828(+)	conserved Plasmodium protein, unknown function	protein coding gene	apicoplast	N/A	N/A	N/A
PF3D7_0514300	PF3D7_0514300.1	N/A	Plasmodium falciparum 3D7	Pf3D7_05_v3:599,959..603,868(+)	aspartate--tRNA ligase, putative	protein coding gene	apicoplast	aspartate-tRNA ligase activity	aspartyl-tRNA aminoacylation	PF00152
PF3D7_0514500	PF3D7_0514500.1	N/A	Plasmodium falciparum 3D7	Pf3D7_05_v3:604,633..606,347(-)	conserved Plasmodium membrane protein, unknown function	protein coding gene	N/A	N/A	N/A	N/A
PF3D7_0514600	PF3D7_0514600.1	N/A	Plasmodium falciparum 3D7	Pf3D7_05_v3:606,433..609,049(-)	ribose-5-phosphate isomerase, putative	protein coding gene	N/A	ribose-5-phosphate isomerase activity	pentose-phosphate shunt, non-oxidative branch;pyridoxine biosynthetic process	PF06026
PF3D7_0514700	PF3D7_0514700.1	N/A	Plasmodium falciparum 3D7	Pf3D7_05_v3:610,089..614,771(+)	MORN repeat protein, putative	protein coding gene	N/A	N/A	N/A	PF02493
PF3D7_0514800	PF3D7_0514800.1	N/A	Plasmodium falciparum 3D7	Pf3D7_05_v3:615,232..618,202(-)	inositol polyphosphate multikinase, putative	protein coding gene	cytoplasm;nucleus	inositol tetrakisphosphate kinase activity;inositol-1,4,5-trisphosphate 3-kinase activity;kinase activity	inositol phosphate biosynthetic process	PF03770
PF3D7_0514900	PF3D7_0514900.1	N/A	Plasmodium falciparum 3D7	Pf3D7_05_v3:618,369..620,372(+)	conserved Plasmodium protein, unknown function	protein coding gene	nucleus;transcription regulator complex	N/A	N/A	N/A
PF3D7_0515000	PF3D7_0515000.1	CWC2	Plasmodium falciparum 3D7	Pf3D7_05_v3:620,377..624,323(-)	pre-mRNA-splicing factor CWC2, putative	protein coding gene	Prp19 complex;U2-type catalytic step 1 spliceosome;U2-type catalytic step 2 spliceosome;nucleus;spliceosomal complex	U6 snRNA binding;mRNA binding;pre-mRNA binding;protein binding	mRNA splicing, via spliceosome;positive regulation of cell cycle;spliceosomal snRNP assembly	PF00076;PF16131
PF3D7_0515100	PF3D7_0515100.1	ROM9	Plasmodium falciparum 3D7	Pf3D7_05_v3:624,719..626,844(-)	rhomboid protease ROM9	protein coding gene	mitochondrion	serine-type endopeptidase activity	N/A	PF01694
PF3D7_0515200	PF3D7_0515200.1	N/A	Plasmodium falciparum 3D7	Pf3D7_05_v3:627,289..627,961(+)	conserved Plasmodium protein, unknown function	protein coding gene	Maurer's cleft	N/A	N/A	N/A
PF3D7_0515300	PF3D7_0515300.1	PI3K	Plasmodium falciparum 3D7	Pf3D7_05_v3:628,784..635,412(+)	phosphatidylinositol 3-kinase	protein coding gene	cytoplasm;cytoplasmic vesicle;endosome;food vacuole;host intracellular region;membrane;peroxisome;phagophore assembly site;phosphatidylinositol 3-kinase complex, class III, type I;phosphatidylinositol 3-kinase complex, class III, type II	1-phosphatidylinositol-3-kinase activity;hemoglobin binding;phosphatidylinositol kinase activity;protein binding	autophagosome assembly;autophagy of peroxisome;endocytosis;intracellular transport;phosphatidylinositol phosphate biosynthetic process;phosphatidylinositol-3-phosphate biosynthetic process;phosphatidylinositol-mediated signaling;response to xenobiotic stimulus	PF00454;PF00613
PF3D7_0515400	PF3D7_0515400.1	N/A	Plasmodium falciparum 3D7	Pf3D7_05_v3:636,591..640,519(+)	conserved protein, unknown function	protein coding gene	inner membrane pellicle complex	N/A	N/A	N/A
PF3D7_0515500	PF3D7_0515500.1	GEP1	Plasmodium falciparum 3D7	Pf3D7_05_v3:641,137..644,685(-)	gametogenesis essential protein 1, putative	protein coding gene	cytosol;integral component of membrane	N/A	cGMP biosynthetic process	N/A
PF3D7_0515600	PF3D7_0515600.1	GEP	Plasmodium falciparum 3D7	Pf3D7_05_v3:646,042..652,163(+)	gamete egress protein GEP, putative	protein coding gene	osmiophilic body	N/A	N/A	PF12872
PF3D7_0515700	PF3D7_0515700.1	GAP40	Plasmodium falciparum 3D7	Pf3D7_05_v3:653,317..656,149(-)	glideosome-associated protein 40, putative	protein coding gene	cell surface;cytoplasm;inner membrane pellicle complex;integral component of membrane;nucleus	N/A	N/A	N/A
PF3D7_0515800	PF3D7_0515800.1	N/A	Plasmodium falciparum 3D7	Pf3D7_05_v3:657,947..659,643(-)	BolA-like protein, putative	protein coding gene	cytosol;nucleus	iron-sulfur cluster binding	[2Fe-2S] cluster assembly;cellular iron ion homeostasis	PF01722
PF3D7_0515900	PF3D7_0515900.1	NIF2	Plasmodium falciparum 3D7	Pf3D7_05_v3:659,849..661,610(-)	NLI interacting factor-like phosphatase, putative	protein coding gene	cytoplasm	phosphoprotein phosphatase activity	N/A	PF03031
PF3D7_0516000	PF3D7_0516000.1	N/A	Plasmodium falciparum 3D7	Pf3D7_05_v3:662,435..667,113(+)	RAP protein, putative	protein coding gene	N/A	N/A	N/A	PF08373
PF3D7_0516100	PF3D7_0516100.1	ATPase1	Plasmodium falciparum 3D7	Pf3D7_05_v3:667,396..675,244(+)	cation-transporting ATPase 1	protein coding gene	integral component of membrane;plasma membrane	N/A	N/A	PF00122;PF12409
PF3D7_0516200	PF3D7_0516200.1	RPS11	Plasmodium falciparum 3D7	Pf3D7_05_v3:675,278..677,624(-)	40S ribosomal protein S11	protein coding gene	cytosolic small ribosomal subunit;extracellular vesicle;nucleus	RNA binding	N/A	PF00411
PF3D7_0516300	PF3D7_0516300.1	N/A	Plasmodium falciparum 3D7	Pf3D7_05_v3:677,677..681,517(+)	tRNA pseudouridine synthase, putative	protein coding gene	apicoplast;cytoplasm;nucleus	pseudouridine synthase activity	mRNA pseudouridine synthesis;tRNA pseudouridine synthesis	PF01416
PF3D7_0516400	PF3D7_0516400.1	PhLP1	Plasmodium falciparum 3D7	Pf3D7_05_v3:680,968..682,644(-)	phosducin-like protein 1, putative	protein coding gene	N/A	N/A	N/A	PF02114
PF3D7_0516500	PF3D7_0516500.1	MFS1	Plasmodium falciparum 3D7	Pf3D7_05_v3:683,708..685,859(+)	major facilitator superfamily domain-containing protein, putative	protein coding gene	integral component of membrane	transmembrane transporter activity	N/A	PF07690
PF3D7_0516600	PF3D7_0516600.1	MB2	Plasmodium falciparum 3D7	Pf3D7_05_v3:686,350..693,455(-)	sporozoite surface antigen MB2	protein coding gene	apicoplast;cytoplasm;cytosol;nucleus;plasma membrane;symbiont-containing vacuole	N/A	N/A	PF00009;PF11987
PF3D7_0516700	PF3D7_0516700.1	N/A	Plasmodium falciparum 3D7	Pf3D7_05_v3:693,120..699,060(+)	ubiquitin carboxyl-terminal hydrolase 2, putative	protein coding gene	N/A	thiol-dependent deubiquitinase	protein deubiquitination	PF00443
PF3D7_0516800	PF3D7_0516800.1	ApiAP2	Plasmodium falciparum 3D7	Pf3D7_05_v3:699,574..708,266(-)	AP2 domain transcription factor AP2-O2, putative	protein coding gene	nucleus	sequence-specific DNA binding	N/A	PF00847;PF14733
PF3D7_0516900	PF3D7_0516900.1	RPL2	Plasmodium falciparum 3D7	Pf3D7_05_v3:712,371..714,307(-)	60S ribosomal protein L2	protein coding gene	cytosolic large ribosomal subunit;nucleus	RNA binding;structural constituent of ribosome	cytoplasmic translation;translation	PF00181;PF03947
PF3D7_0517000	PF3D7_0517000.1	N/A	Plasmodium falciparum 3D7	Pf3D7_05_v3:715,214..717,787(-)	60S ribosomal protein L12, putative	protein coding gene	cytosolic large ribosomal subunit;large ribosomal subunit;nucleus;ribosome	large ribosomal subunit rRNA binding;rRNA binding;structural constituent of ribosome	ribosomal large subunit assembly;translation	PF00298;PF03946
PF3D7_0517100	PF3D7_0517100.1	N/A	Plasmodium falciparum 3D7	Pf3D7_05_v3:717,799..719,939(-)	conserved protein, unknown function	protein coding gene	apicoplast	N/A	N/A	N/A
PF3D7_0517200	PF3D7_0517200.1	N/A	Plasmodium falciparum 3D7	Pf3D7_05_v3:720,614..722,849(-)	conserved Plasmodium protein, unknown function	protein coding gene	sarcoplasmic reticulum lumen	calcium ion binding	regulation of release of sequestered calcium ion into cytosol	N/A
PF3D7_0517300	PF3D7_0517300.1	SR1	Plasmodium falciparum 3D7	Pf3D7_05_v3:723,233..727,755(-)	serine/arginine-rich splicing factor 1	protein coding gene	cytoplasm;nuclear speck;nucleus;spliceosomal complex	RNA binding;phosphorylated histone binding	RNA splicing;cellular response to DNA damage stimulus;mRNA cis splicing, via spliceosome;mRNA processing;regulation of alternative mRNA splicing, via spliceosome;regulation of mRNA splicing, via spliceosome	PF00076
PF3D7_0517400	PF3D7_0517400.1	FACT-L	Plasmodium falciparum 3D7	Pf3D7_05_v3:731,350..735,605(+)	FACT complex subunit SPT16, putative	protein coding gene	FACT complex;nucleus	nucleosome binding	DNA replication-independent chromatin organization;positive regulation of transcription elongation from RNA polymerase II promoter;transcription elongation from RNA polymerase II promoter;transcription, DNA-templated	PF00557;PF08512;PF08644;PF14826
PF3D7_0517500	PF3D7_0517500.1	N/A	Plasmodium falciparum 3D7	Pf3D7_05_v3:735,386..738,469(-)	UTP--glucose-1-phosphate uridylyltransferase, putative	protein coding gene	N/A	UDP-N-acetylglucosamine diphosphorylase activity	UDP-N-acetylglucosamine biosynthetic process;nucleotide-sugar biosynthetic process	PF01704
PF3D7_0517600	PF3D7_0517600.1	CPbeta	Plasmodium falciparum 3D7	Pf3D7_05_v3:739,651..741,365(-)	F-actin-capping protein subunit beta, putative	protein coding gene	F-actin capping protein complex;osmiophilic body	actin filament binding	actin filament capping;barbed-end actin filament capping;cell morphogenesis;entry into host	PF01115
PF3D7_0517700	PF3D7_0517700.1	EIF3B	Plasmodium falciparum 3D7	Pf3D7_05_v3:742,798..745,633(+)	eukaryotic translation initiation factor 3 subunit B, putative	protein coding gene	eukaryotic translation initiation factor 3 complex;nucleus	N/A	translational initiation	PF00076;PF08662
PF3D7_0517800	PF3D7_0517800.1	DCX	Plasmodium falciparum 3D7	Pf3D7_05_v3:745,798..746,634(-)	apicortin	protein coding gene	apical part of cell;cell surface	microtubule binding;protein binding	positive regulation of protein polymerization	N/A
PF3D7_0517900	PF3D7_0517900.1	N/A	Plasmodium falciparum 3D7	Pf3D7_05_v3:747,364..749,746(-)	zinc finger protein, putative	protein coding gene	chromosome, telomeric region	zinc ion binding	N/A	PF00643
PF3D7_0518000	PF3D7_0518000.1	N/A	Plasmodium falciparum 3D7	Pf3D7_05_v3:750,421..752,625(+)	NOSIP domain-containing protein, putative	protein coding gene	nucleus	N/A	N/A	PF15906
PF3D7_0518100	PF3D7_0518100.1	AMR2	Plasmodium falciparum 3D7	Pf3D7_05_v3:753,178..758,036(+)	protein AMR2	protein coding gene	apicoplast	N/A	plastid organization	PF08373
PF3D7_0518200	PF3D7_0518200.1	MDM2	Plasmodium falciparum 3D7	Pf3D7_05_v3:757,797..759,247(-)	SWIB/MDM2 domain-containing protein	protein coding gene	mitochondrion;nucleus	protein binding	regulation of transcription by RNA polymerase II	PF02201
PF3D7_0518300	PF3D7_0518300.1	N/A	Plasmodium falciparum 3D7	Pf3D7_05_v3:759,377..761,483(-)	proteasome subunit beta type-1, putative	protein coding gene	nucleus	N/A	N/A	PF00227
PF3D7_0518400	PF3D7_0518400.1	CYC3	Plasmodium falciparum 3D7	Pf3D7_05_v3:762,103..762,792(-)	cyclin, putative	protein coding gene	cytosol;nucleus	N/A	negative regulation of cyclin-dependent protein serine/threonine kinase activity;regulation of cell cycle	PF08613
PF3D7_0518500	PF3D7_0518500.1	DDX23	Plasmodium falciparum 3D7	Pf3D7_05_v3:762,933..767,061(-)	ATP-dependent RNA helicase DDX23, putative	protein coding gene	N/A	N/A	N/A	PF00270;PF00271
PF3D7_0518600	PF3D7_0518600.1	WDR26	Plasmodium falciparum 3D7	Pf3D7_05_v3:768,798..774,027(+)	WD repeat-containing protein 26, putative	protein coding gene	N/A	N/A	N/A	PF00400
PF3D7_0518700	PF3D7_0518700.1	PUF1	Plasmodium falciparum 3D7	Pf3D7_05_v3:774,052..780,916(-)	mRNA-binding protein PUF1	protein coding gene	cytoplasm	mRNA binding	posttranscriptional regulation of gene expression;regulation of RNA stability;regulation of translation	PF00806
PF3D7_0518800	PF3D7_0518800.1	PSOP13	Plasmodium falciparum 3D7	Pf3D7_05_v3:783,638..784,991(-)	secreted ookinete protein, putative	protein coding gene	N/A	N/A	N/A	N/A
PF3D7_0518900	PF3D7_0518900.1	N/A	Plasmodium falciparum 3D7	Pf3D7_05_v3:785,664..786,565(-)	conserved protein, unknown function	protein coding gene	inner membrane pellicle complex	N/A	N/A	N/A
PF3D7_0519000	PF3D7_0519000.1	SLBP	Plasmodium falciparum 3D7	Pf3D7_05_v3:788,099..790,045(+)	histone RNA hairpin-binding protein, putative	protein coding gene	cytoplasm;histone pre-mRNA 3'end processing complex;nucleus	histone pre-mRNA stem-loop binding;mRNA binding	mRNA 3'-end processing by stem-loop binding and cleavage;mRNA transport	PF15247
PF3D7_0519100	PF3D7_0519100.1	N/A	Plasmodium falciparum 3D7	Pf3D7_05_v3:790,072..791,204(+)	50S ribosomal protein L14, mitochondrial, putative	protein coding gene	mitochondrial large ribosomal subunit;mitochondrion	large ribosomal subunit rRNA binding;structural constituent of ribosome	N/A	PF00238
PF3D7_0519200	PF3D7_0519200.1	N/A	Plasmodium falciparum 3D7	Pf3D7_05_v3:791,256..793,280(-)	V-type proton ATPase 16 kDa proteolipid subunit	protein coding gene	integral component of membrane;membrane	proton-transporting ATPase activity, rotational mechanism	proton transmembrane transport	PF00137
PF3D7_0519300	PF3D7_0519300.1	COX10	Plasmodium falciparum 3D7	Pf3D7_05_v3:795,081..797,815(+)	protoheme IX farnesyltransferase	protein coding gene	mitochondrion	farnesyltranstransferase activity;prenyltransferase activity	cellular respiration;heme biosynthetic process	PF01040
PF3D7_0519400	PF3D7_0519400.1	RPS24	Plasmodium falciparum 3D7	Pf3D7_05_v3:797,479..799,233(-)	40S ribosomal protein S24	protein coding gene	cytosolic small ribosomal subunit;nucleus	RNA binding	N/A	PF01282
PF3D7_0519500	PF3D7_0519500.1	CCR4-1	Plasmodium falciparum 3D7	Pf3D7_05_v3:801,173..810,530(-)	CCR4 domain-containing protein 1, putative	protein coding gene	CCR4-NOT complex;cytoplasm;nucleus	3'-5'-exoribonuclease activity;poly(A)-specific ribonuclease activity	nuclear-transcribed mRNA poly(A) tail shortening	PF03372
PF3D7_0519600	PF3D7_0519600.1	N/A	Plasmodium falciparum 3D7	Pf3D7_05_v3:811,849..815,452(+)	zinc finger protein, putative	protein coding gene	nucleus	N/A	N/A	PF07967
PF3D7_0519700	PF3D7_0519700.1	N/A	Plasmodium falciparum 3D7	Pf3D7_05_v3:816,163..819,538(+)	FoP domain-containing protein, putative	protein coding gene	RNA N6-methyladenosine methyltransferase complex;nucleus	N/A	N/A	PF13865
PF3D7_0519800	PF3D7_0519800.1	N/A	Plasmodium falciparum 3D7	Pf3D7_05_v3:819,888..824,376(-)	EELM2 domain-containing protein, putative	protein coding gene	nucleus	lysine-acetylated histone binding	N/A	PF15863
PF3D7_0519900	PF3D7_0519900.1	N/A	Plasmodium falciparum 3D7	Pf3D7_05_v3:825,229..828,230(-)	conserved protein, unknown function	protein coding gene	apicoplast	N/A	N/A	N/A
PF3D7_0520000	PF3D7_0520000.1	RPS9	Plasmodium falciparum 3D7	Pf3D7_05_v3:828,277..830,137(+)	40S ribosomal protein S9, putative	protein coding gene	RNA N6-methyladenosine methyltransferase complex;cytosolic small ribosomal subunit;nucleus;small ribosomal subunit;small-subunit processome	RNA binding;rRNA binding;structural constituent of ribosome	positive regulation of translational fidelity	PF00163;PF01479
PF3D7_0520100	PF3D7_0520100.1	PPM9	Plasmodium falciparum 3D7	Pf3D7_05_v3:830,897..834,873(+)	protein phosphatase PPM9, putative	protein coding gene	N/A	catalytic activity;magnesium-dependent protein serine/threonine phosphatase activity;protein serine/threonine phosphatase activity	N/A	PF00481
PF3D7_0520200	PF3D7_0520200.1	MED17	Plasmodium falciparum 3D7	Pf3D7_05_v3:834,812..837,967(-)	mediator of RNA polymerase II transcription subunit 17, putative	protein coding gene	mediator complex	N/A	N/A	N/A
PF3D7_0520300	PF3D7_0520300.1	LSM2	Plasmodium falciparum 3D7	Pf3D7_05_v3:837,998..839,532(+)	U6 snRNA-associated Sm-like protein LSm2, putative	protein coding gene	Lsm1-7-Pat1 complex;P-body;U4/U6 x U5 tri-snRNP complex;U6 snRNP;catalytic step 2 spliceosome;intracellular;nucleus;precatalytic spliceosome;sno(s)RNA-containing ribonucleoprotein complex	N/A	mRNA splicing, via spliceosome	PF01423
PF3D7_0520400	PF3D7_0520400.1	N/A	Plasmodium falciparum 3D7	Pf3D7_05_v3:839,260..841,139(-)	single-stranded DNA-binding protein, putative	protein coding gene	intracellular;nucleus	N/A	N/A	N/A
PF3D7_0520500	PF3D7_0520500.1	N/A	Plasmodium falciparum 3D7	Pf3D7_05_v3:841,321..842,672(-)	phosphomethylpyrimidine kinase, putative	protein coding gene	cytoplasm;cytosol	hydroxymethylpyrimidine kinase activity;kinase activity;phosphomethylpyrimidine kinase activity	thiamine biosynthetic process	PF08543
PF3D7_0520600	PF3D7_0520600.1	Ap4AH	Plasmodium falciparum 3D7	Pf3D7_05_v3:842,960..845,134(-)	bis(5'-nucleosyl)-tetraphosphatase [asymmetrical]	protein coding gene	host cell membrane	bis(5'-nucleosyl)-tetraphosphatase (asymmetrical) activity	AMP biosynthetic process;ATP biosynthetic process	PF00293
PF3D7_0520700	PF3D7_0520700.1	N/A	Plasmodium falciparum 3D7	Pf3D7_05_v3:845,538..848,991(-)	CDC73 domain-containing protein, putative	protein coding gene	Cdc73/Paf1 complex	RNA polymerase II complex binding	positive regulation of transcription elongation from RNA polymerase II promoter;recruitment of 3'-end processing factors to RNA polymerase II holoenzyme complex	PF05179
PF3D7_0520800	PF3D7_0520800.1	N/A	Plasmodium falciparum 3D7	Pf3D7_05_v3:849,251..856,116(-)	conserved protein, unknown function	protein coding gene	apicoplast	N/A	N/A	N/A
PF3D7_0520900	PF3D7_0520900.1	SAHH	Plasmodium falciparum 3D7	Pf3D7_05_v3:856,500..859,367(+)	adenosylhomocysteinase	protein coding gene	Maurer's cleft;cytosol;intracellular	adenosylhomocysteinase activity;protein binding	S-adenosylmethionine cycle	PF00670;PF05221
PF3D7_0521000	PF3D7_0521000.1	N/A	Plasmodium falciparum 3D7	Pf3D7_05_v3:858,511..861,445(-)	conserved Plasmodium protein, unknown function	protein coding gene	nucleus	N/A	N/A	N/A
PF3D7_0521100	PF3D7_0521100.1	N/A	Plasmodium falciparum 3D7	Pf3D7_05_v3:861,930..867,583(-)	conserved Plasmodium protein, unknown function	protein coding gene	N/A	N/A	N/A	N/A
PF3D7_0521200	PF3D7_0521200.1	N/A	Plasmodium falciparum 3D7	Pf3D7_05_v3:868,694..869,943(+)	conserved protein, unknown function	protein coding gene	mitochondrion	N/A	N/A	N/A
PF3D7_0521300	PF3D7_0521300.1	N/A	Plasmodium falciparum 3D7	Pf3D7_05_v3:870,142..875,484(-)	zinc finger protein, putative	protein coding gene	N/A	N/A	N/A	N/A
PF3D7_0521400	PF3D7_0521400.1	N/A	Plasmodium falciparum 3D7	Pf3D7_05_v3:875,800..877,760(-)	conserved protein, unknown function	protein coding gene	apicoplast	N/A	N/A	N/A
PF3D7_0521500	PF3D7_0521500.1	N/A	Plasmodium falciparum 3D7	Pf3D7_05_v3:877,768..879,984(+)	ribosomal large subunit pseudouridylate synthase, putative	protein coding gene	N/A	pseudouridine synthase activity;pseudouridylate synthase activity	enzyme-directed rRNA pseudouridine synthesis;rRNA processing	PF00849
PF3D7_0521600	PF3D7_0521600.1	N/A	Plasmodium falciparum 3D7	Pf3D7_05_v3:879,807..881,622(-)	conserved Plasmodium protein, unknown function	protein coding gene	N/A	N/A	N/A	N/A
PF3D7_0521700	PF3D7_0521700.1	DDX1	Plasmodium falciparum 3D7	Pf3D7_05_v3:882,262..885,355(+)	ATP-dependent RNA helicase DDX1, putative	protein coding gene	nucleus	N/A	rRNA processing	PF00270;PF00271;PF00622
PF3D7_0521800	PF3D7_0521800.1	N/A	Plasmodium falciparum 3D7	Pf3D7_05_v3:885,714..888,232(+)	AFG1-like ATPase, putative	protein coding gene	cytoplasm;mitochondrion	ATP hydrolysis activity	N/A	PF03969
PF3D7_0521900	PF3D7_0521900.1	N/A	Plasmodium falciparum 3D7	Pf3D7_05_v3:888,657..895,144(+)	conserved Plasmodium protein, unknown function	protein coding gene	mitochondrion	N/A	N/A	N/A
PF3D7_0522000	PF3D7_0522000.1	N/A	Plasmodium falciparum 3D7	Pf3D7_05_v3:895,431..897,323(+)	conserved Plasmodium protein, unknown function	protein coding gene	N/A	N/A	N/A	N/A
PF3D7_0522100	PF3D7_0522100.1	N/A	Plasmodium falciparum 3D7	Pf3D7_05_v3:897,008..900,527(-)	conserved Plasmodium protein, unknown function	protein coding gene	N/A	N/A	N/A	N/A
PF3D7_0522200	PF3D7_0522200.1	TAF10	Plasmodium falciparum 3D7	Pf3D7_05_v3:900,568..902,520(+)	transcription initiation factor TFIID subunit 10, putative	protein coding gene	transcription regulator complex	protein binding	transcription by RNA polymerase II	N/A
PF3D7_0522300	PF3D7_0522300.1	N/A	Plasmodium falciparum 3D7	Pf3D7_05_v3:902,269..905,399(-)	18S rRNA (guanine-N(7))-methyltransferase, putative	protein coding gene	nucleolus	S-adenosylmethionine-dependent methyltransferase activity;rRNA (guanine) methyltransferase activity	rRNA (guanine-N7)-methylation	PF08241;PF12589
PF3D7_0522400	PF3D7_0522400.1	N/A	Plasmodium falciparum 3D7	Pf3D7_05_v3:907,140..937,000(+)	conserved Plasmodium protein, unknown function	protein coding gene	N/A	N/A	N/A	N/A
PF3D7_0522500	PF3D7_0522500.1	RPL17	Plasmodium falciparum 3D7	Pf3D7_05_v3:937,231..938,037(+)	50S ribosomal protein L17, apicoplast, putative	protein coding gene	apicoplast;large ribosomal subunit;mitochondrial large ribosomal subunit	structural constituent of ribosome	translation	PF01196
PF3D7_0522600	PF3D7_0522600.1	N/A	Plasmodium falciparum 3D7	Pf3D7_05_v3:939,097..942,014(+)	magnesium transporter NIPA, putative	protein coding gene	inner membrane pellicle complex	N/A	N/A	PF05653
PF3D7_0522700	PF3D7_0522700.1	SufA	Plasmodium falciparum 3D7	Pf3D7_05_v3:942,427..944,106(+)	iron-sulfur cluster assembly protein SufA	protein coding gene	apicoplast;cytoplasm	2 iron, 2 sulfur cluster binding	iron-sulfur cluster assembly;protein maturation by iron-sulfur cluster transfer	PF01521
PF3D7_0522800	PF3D7_0522800.1	BUD31	Plasmodium falciparum 3D7	Pf3D7_05_v3:943,731..945,784(-)	pre-mRNA-splicing factor BUD31, putative	protein coding gene	U2 snRNP;nucleus;spliceosomal complex	N/A	RNA splicing;alternative mRNA splicing, via spliceosome;mRNA splicing, via spliceosome	PF01125
PF3D7_0522900	PF3D7_0522900.1	N/A	Plasmodium falciparum 3D7	Pf3D7_05_v3:948,230..953,960(+)	zinc finger protein, putative	protein coding gene	N/A	N/A	N/A	N/A
PF3D7_0523000	PF3D7_0523000.1	MDR1	Plasmodium falciparum 3D7	Pf3D7_05_v3:955,955..963,095(+)	multidrug resistance protein 1	protein coding gene	food vacuole;integral component of membrane;nucleus	ATPase-coupled transmembrane transporter activity;protein binding	response to drug;response to xenobiotic stimulus;transmembrane transport	PF00005;PF00664
PF3D7_0523100	PF3D7_0523100.1	QCR2	Plasmodium falciparum 3D7	Pf3D7_05_v3:962,443..965,404(-)	mitochondrial-processing peptidase subunit alpha, putative	protein coding gene	mitochondrial processing peptidase complex;mitochondrion	metalloendopeptidase activity;ubiquinol-cytochrome-c reductase activity	protein processing involved in protein targeting to mitochondrion	PF00675;PF05193
PF3D7_0523200	PF3D7_0523200.1	N/A	Plasmodium falciparum 3D7	Pf3D7_05_v3:965,466..970,150(+)	heptatricopeptide repeat-containing protein, putative	protein coding gene	N/A	N/A	N/A	N/A
PF3D7_0523300	PF3D7_0523300.1	ApiCOX18	Plasmodium falciparum 3D7	Pf3D7_05_v3:969,839..971,652(-)	cytochrome c oxidase subunit ApiCOX18, putative	protein coding gene	mitochondrial respiratory chain complex IV;mitochondrion	N/A	N/A	N/A
PF3D7_0523400	PF3D7_0523400.1	N/A	Plasmodium falciparum 3D7	Pf3D7_05_v3:973,038..976,138(+)	DnaJ protein, putative	protein coding gene	N/A	N/A	N/A	PF00226;PF14308
PF3D7_0523500	PF3D7_0523500.1	N/A	Plasmodium falciparum 3D7	Pf3D7_05_v3:976,450..978,046(-)	dynein light chain Tctex-type, putative	protein coding gene	dynein complex	N/A	N/A	PF03645
PF3D7_0523600	PF3D7_0523600.1	N/A	Plasmodium falciparum 3D7	Pf3D7_05_v3:978,381..979,999(+)	conserved protein, unknown function	protein coding gene	N/A	N/A	N/A	N/A
PF3D7_0523700	PF3D7_0523700.1	N/A	Plasmodium falciparum 3D7	Pf3D7_05_v3:980,469..986,038(-)	conserved Plasmodium membrane protein, unknown function	protein coding gene	N/A	N/A	N/A	N/A
PF3D7_0523800	PF3D7_0523800.1	N/A	Plasmodium falciparum 3D7	Pf3D7_05_v3:987,076..992,081(+)	divalent metal transporter, putative	protein coding gene	integral component of membrane;membrane	cadmium ion transmembrane transporter activity;manganese ion transmembrane transporter activity	N/A	PF01566
PF3D7_0523900	PF3D7_0523900.1	N/A	Plasmodium falciparum 3D7	Pf3D7_05_v3:992,760..997,375(-)	MerC domain-containing protein, putative	protein coding gene	integral component of membrane	N/A	N/A	PF03203
PF3D7_0524000	PF3D7_0524000.1	KASbeta	Plasmodium falciparum 3D7	Pf3D7_05_v3:995,782..1,002,522(+)	karyopherin beta	protein coding gene	RNA N6-methyladenosine methyltransferase complex;cytoplasm;food vacuole;nuclear pore;nucleus	RNA binding;nuclear import signal receptor activity;nuclear localization sequence binding;protein domain specific binding;protein heterodimerization activity	NLS-bearing protein import into nucleus;nucleocytoplasmic transport;protein import into nucleus	PF12755;PF18808;PF18829
PF3D7_0524100	PF3D7_0524100.1	N/A	Plasmodium falciparum 3D7	Pf3D7_05_v3:1,002,547..1,008,230(+)	conserved Plasmodium protein, unknown function	protein coding gene	N/A	N/A	N/A	N/A
PF3D7_0524200	PF3D7_0524200.1	N/A	Plasmodium falciparum 3D7	Pf3D7_05_v3:1,008,263..1,010,159(-)	conserved Plasmodium membrane protein, unknown function	protein coding gene	N/A	N/A	N/A	N/A
PF3D7_0524300	PF3D7_0524300.1	N/A	Plasmodium falciparum 3D7	Pf3D7_05_v3:1,010,595..1,012,862(-)	conserved Plasmodium protein, unknown function	protein coding gene	N/A	N/A	N/A	PF10199
PF3D7_0524400	PF3D7_0524400.1	RBG1	Plasmodium falciparum 3D7	Pf3D7_05_v3:1,013,254..1,015,395(-)	ribosome-interacting GTPase 1, putative	protein coding gene	nucleus	N/A	N/A	PF01926;PF02824;PF16897
PF3D7_0524500	PF3D7_0524500.1	N/A	Plasmodium falciparum 3D7	Pf3D7_05_v3:1,015,608..1,017,341(+)	conserved Plasmodium protein, unknown function	protein coding gene	nucleus	N/A	N/A	N/A
PF3D7_0524600	PF3D7_0524600.1	N/A	Plasmodium falciparum 3D7	Pf3D7_05_v3:1,017,358..1,019,072(+)	50S ribosomal protein L12, apicoplast, putative	protein coding gene	apicoplast;large ribosomal subunit	structural constituent of ribosome	translation	PF00542;PF16320
PF3D7_0524700	PF3D7_0524700.1	TOM22	Plasmodium falciparum 3D7	Pf3D7_05_v3:1,018,901..1,020,362(-)	mitochondrial import receptor subunit TOM22, putative	protein coding gene	mitochondrial outer membrane translocase complex;mitochondrion	N/A	protein targeting to mitochondrion	PF04281
PF3D7_0524800	PF3D7_0524800.1	UFD1	Plasmodium falciparum 3D7	Pf3D7_05_v3:1,020,924..1,024,781(-)	ubiquitin fusion degradation protein 1, putative	protein coding gene	N/A	N/A	N/A	PF03152
PF3D7_0524900	PF3D7_0524900.1	TYW1	Plasmodium falciparum 3D7	Pf3D7_05_v3:1,026,705..1,030,943(+)	S-adenosyl-L-methionine-dependent tRNA 4-demethylwyosine synthase, putative	protein coding gene	N/A	N/A	wybutosine biosynthetic process	PF00258;PF04055;PF08608
PF3D7_0525000	PF3D7_0525000.1	N/A	Plasmodium falciparum 3D7	Pf3D7_05_v3:1,034,754..1,039,424(+)	zinc finger protein, putative	protein coding gene	cytosol;nucleus	nucleic acid binding	N/A	N/A
PF3D7_0525100	PF3D7_0525100.1	ACS10	Plasmodium falciparum 3D7	Pf3D7_05_v3:1,040,922..1,043,921(+)	acyl-CoA synthetase	protein coding gene	Maurer's cleft;endoplasmic reticulum;membrane	RNA binding;long-chain fatty acid-CoA ligase activity	fatty acid metabolic process;response to xenobiotic stimulus	PF00501
PF3D7_0525200	PF3D7_0525200.1	SMC6	Plasmodium falciparum 3D7	Pf3D7_05_v3:1,044,284..1,051,519(+)	structural maintenance of chromosomes protein 6, putative	protein coding gene	N/A	N/A	N/A	N/A
PF3D7_0525300	PF3D7_0525300.1	N/A	Plasmodium falciparum 3D7	Pf3D7_05_v3:1,052,224..1,053,970(-)	conserved protein, unknown function	protein coding gene	N/A	N/A	N/A	N/A
PF3D7_0525400	PF3D7_0525400.1	N/A	Plasmodium falciparum 3D7	Pf3D7_05_v3:1,057,597..1,059,130(+)	7-helix-1 protein	protein coding gene	cytoplasmic stress granule;cytosol;integral component of plasma membrane;plasma membrane	G protein-coupled receptor activity;protein binding;ribonucleoprotein complex binding	G protein-coupled receptor signaling pathway;negative regulation of translation	PF05147
PF3D7_0525500	PF3D7_0525500.1	N/A	Plasmodium falciparum 3D7	Pf3D7_05_v3:1,059,480..1,065,703(-)	WD repeat-containing protein, putative	protein coding gene	N/A	N/A	N/A	N/A
PF3D7_0525600	PF3D7_0525600.1	N/A	Plasmodium falciparum 3D7	Pf3D7_05_v3:1,065,902..1,070,111(-)	RNA methyltransferase, putative	protein coding gene	mitochondrion	N/A	N/A	PF00588
PF3D7_0525700	PF3D7_0525700.1	N/A	Plasmodium falciparum 3D7	Pf3D7_05_v3:1,068,225..1,070,098(+)	conserved protein, unknown function	protein coding gene	apicoplast	N/A	N/A	N/A
PF3D7_0525800	PF3D7_0525800.1	IMC1g	Plasmodium falciparum 3D7	Pf3D7_05_v3:1,071,094..1,072,988(+)	inner membrane complex protein 1g, putative	protein coding gene	inner membrane pellicle complex	N/A	N/A	PF12314
PF3D7_0525900	PF3D7_0525900.1	NEK2	Plasmodium falciparum 3D7	Pf3D7_05_v3:1,073,417..1,075,644(+)	NIMA related kinase 2	protein coding gene	N/A	protein serine/threonine kinase activity;protein tyrosine kinase activity	protein phosphorylation	PF00069
PF3D7_0526000	PF3D7_0526000.1	N/A	Plasmodium falciparum 3D7	Pf3D7_05_v3:1,075,782..1,079,027(-)	RAP protein, putative	protein coding gene	N/A	N/A	N/A	PF08373
PF3D7_0526100	PF3D7_0526100.1	N/A	Plasmodium falciparum 3D7	Pf3D7_05_v3:1,079,225..1,081,313(+)	conserved Plasmodium membrane protein, unknown function	protein coding gene	N/A	N/A	N/A	N/A
PF3D7_0526200	PF3D7_0526200.1	ARFGAP2	Plasmodium falciparum 3D7	Pf3D7_05_v3:1,081,123..1,084,702(-)	ADP-ribosylation factor GTPase-activating protein 2	protein coding gene	N/A	GTPase activator activity	N/A	PF01412
PF3D7_0526200	PF3D7_0526200.2	ARFGAP2	Plasmodium falciparum 3D7	Pf3D7_05_v3:1,081,123..1,084,702(-)	ADP-ribosylation factor GTPase-activating protein 2	protein coding gene	N/A	GTPase activator activity	N/A	PF01412
PF3D7_0526300	PF3D7_0526300.1	WDR55	Plasmodium falciparum 3D7	Pf3D7_05_v3:1,085,623..1,087,455(-)	WD repeat-containing protein 55, putative	protein coding gene	nucleolus	N/A	rRNA processing	PF12894
PF3D7_0526400	PF3D7_0526400.1	N/A	Plasmodium falciparum 3D7	Pf3D7_05_v3:1,087,761..1,089,508(+)	conserved Plasmodium protein, unknown function	protein coding gene	N/A	N/A	N/A	N/A
PF3D7_0526500	PF3D7_0526500.1	N/A	Plasmodium falciparum 3D7	Pf3D7_05_v3:1,090,492..1,095,184(+)	conserved Plasmodium protein, unknown function	protein coding gene	nucleus	mRNA binding	RNA 3'-end processing	PF05843
PF3D7_0526600	PF3D7_0526600.1	N/A	Plasmodium falciparum 3D7	Pf3D7_05_v3:1,098,833..1,116,194(+)	conserved Plasmodium protein, unknown function	protein coding gene	N/A	N/A	N/A	N/A
PF3D7_0526700	PF3D7_0526700.1	N/A	Plasmodium falciparum 3D7	Pf3D7_05_v3:1,117,087..1,119,867(-)	conserved protein, unknown function	protein coding gene	apicoplast	N/A	N/A	PF05542
PF3D7_0526800	PF3D7_0526800.1	N/A	Plasmodium falciparum 3D7	Pf3D7_05_v3:1,120,104..1,122,685(-)	conserved Plasmodium protein, unknown function	protein coding gene	nucleus	N/A	N/A	N/A
PF3D7_0526900	PF3D7_0526900.1	N/A	Plasmodium falciparum 3D7	Pf3D7_05_v3:1,122,602..1,124,595(+)	transmembrane emp24 domain-containing protein, putative	protein coding gene	N/A	protein binding	N/A	PF01105
PF3D7_0527000	PF3D7_0527000.1	MCM3	Plasmodium falciparum 3D7	Pf3D7_05_v3:1,124,729..1,129,071(-)	DNA replication licensing factor MCM3, putative	protein coding gene	MCM complex;nucleus	ATP hydrolysis activity;DNA replication origin binding;single-stranded DNA binding	DNA strand elongation involved in DNA replication;double-strand break repair via break-induced replication;mitotic DNA replication initiation;pre-replicative complex assembly involved in nuclear cell cycle DNA replication	PF00493;PF17207;PF17855
PF3D7_0527100	PF3D7_0527100.1	UBC13	Plasmodium falciparum 3D7	Pf3D7_05_v3:1,129,570..1,131,702(-)	ubiquitin-conjugating enzyme E2 13	protein coding gene	nucleus	ubiquitin conjugating enzyme activity;ubiquitin-protein transferase activity	postreplication repair;protein K63-linked ubiquitination;protein polyubiquitination;protein ubiquitination;response to xenobiotic stimulus	PF00179
PF3D7_0527200	PF3D7_0527200.1	USP14	Plasmodium falciparum 3D7	Pf3D7_05_v3:1,132,901..1,135,534(-)	ubiquitin carboxyl-terminal hydrolase 14	protein coding gene	nucleus	proteasome binding;thiol-dependent deubiquitinase	protein deubiquitination	PF00240;PF00443
PF3D7_0527300	PF3D7_0527300.1	METAP1a	Plasmodium falciparum 3D7	Pf3D7_05_v3:1,135,566..1,138,779(-)	methionine aminopeptidase 1a, putative	protein coding gene	mitochondrion	mRNA binding;metalloaminopeptidase activity;metalloexopeptidase activity	proteolysis	PF00557
PF3D7_0527400	PF3D7_0527400.1	N/A	Plasmodium falciparum 3D7	Pf3D7_05_v3:1,138,602..1,141,621(+)	conserved Plasmodium protein, unknown function	protein coding gene	N/A	N/A	N/A	N/A
PF3D7_0527500	PF3D7_0527500.1	HIP	Plasmodium falciparum 3D7	Pf3D7_05_v3:1,142,668..1,145,603(+)	Hsc70-interacting protein	protein coding gene	nucleus	heat shock protein binding	chaperone cofactor-dependent protein refolding;chaperone-mediated protein folding;protein-containing complex assembly	PF17830;PF18253
PF3D7_0527600	PF3D7_0527600.1	N/A	Plasmodium falciparum 3D7	Pf3D7_05_v3:1,145,803..1,149,684(-)	conserved Plasmodium protein, unknown function	protein coding gene	nucleus	N/A	N/A	N/A
PF3D7_0527900	PF3D7_0527900.1	DDX41	Plasmodium falciparum 3D7	Pf3D7_05_v3:1,153,516..1,156,002(+)	ATP-dependent RNA helicase DDX41, putative	protein coding gene	N/A	N/A	N/A	PF00270;PF00271
PF3D7_0528000	PF3D7_0528000.1	UMP1	Plasmodium falciparum 3D7	Pf3D7_05_v3:1,156,067..1,156,986(-)	proteasome maturation factor UMP1, putative	protein coding gene	N/A	N/A	proteasome assembly	PF05348
PF3D7_0528100	PF3D7_0528100.1	N/A	Plasmodium falciparum 3D7	Pf3D7_05_v3:1,157,507..1,162,257(-)	AP-1/2 complex subunit beta, putative	protein coding gene	nucleus	protein binding	vesicle-mediated transport	PF01602;PF09066
PF3D7_0528200	PF3D7_0528200.1	EIF3E	Plasmodium falciparum 3D7	Pf3D7_05_v3:1,162,969..1,165,509(-)	eukaryotic translation initiation factor 3 subunit E, putative	protein coding gene	eukaryotic translation initiation factor 3 complex;nucleus	mRNA binding	translational initiation	PF01399
PF3D7_0528300	PF3D7_0528300.1	N/A	Plasmodium falciparum 3D7	Pf3D7_05_v3:1,166,047..1,169,378(-)	conserved protein, unknown function	protein coding gene	N/A	N/A	N/A	N/A
PF3D7_0528400	PF3D7_0528400.1	DHHC7	Plasmodium falciparum 3D7	Pf3D7_05_v3:1,170,170..1,174,394(+)	palmitoyltransferase DHHC7	protein coding gene	Golgi apparatus;endoplasmic reticulum;rhoptry	acyltransferase activity;palmitoyltransferase activity;protein-cysteine S-palmitoyltransferase activity	peptidyl-L-cysteine S-palmitoylation;protein palmitoylation;protein targeting to membrane	PF01529
PF3D7_0528500	PF3D7_0528500.1	CPalpha	Plasmodium falciparum 3D7	Pf3D7_05_v3:1,174,532..1,177,311(+)	F-actin-capping protein subunit alpha, putative	protein coding gene	F-actin capping protein complex	actin filament binding	actin cytoskeleton organization;actin filament capping;barbed-end actin filament capping	PF01267
PF3D7_0528600	PF3D7_0528600.1	N/A	Plasmodium falciparum 3D7	Pf3D7_05_v3:1,176,626..1,177,319(-)	conserved Plasmodium protein, unknown function	protein coding gene	N/A	N/A	N/A	N/A
PF3D7_0528700	PF3D7_0528700.1	CYP23	Plasmodium falciparum 3D7	Pf3D7_05_v3:1,178,062..1,179,980(-)	peptidyl-prolyl cis-trans isomerase	protein coding gene	nucleus	cyclosporin A binding;peptidyl-prolyl cis-trans isomerase activity	protein folding;protein peptidyl-prolyl isomerization	PF00160
PF3D7_0528800	PF3D7_0528800.1	N/A	Plasmodium falciparum 3D7	Pf3D7_05_v3:1,180,162..1,182,686(-)	nuclear GTP-binding protein, putative	protein coding gene	nucleolus	GTPase activity	N/A	PF08701
PF3D7_0528900	PF3D7_0528900.1	N/A	Plasmodium falciparum 3D7	Pf3D7_05_v3:1,183,850..1,186,249(-)	conserved protein, unknown function	protein coding gene	N/A	N/A	N/A	N/A
PF3D7_0529000	PF3D7_0529000.1	TIP	Plasmodium falciparum 3D7	Pf3D7_05_v3:1,186,294..1,190,130(-)	T-cell immunomodulatory protein homolog, putative	protein coding gene	apicoplast;cell surface;host cell surface	N/A	N/A	PF13517
PF3D7_0529100	PF3D7_0529100.1	ATrx2	Plasmodium falciparum 3D7	Pf3D7_05_v3:1,190,980..1,192,000(-)	thioredoxin-like protein, putative	protein coding gene	apicoplast	N/A	N/A	N/A
PF3D7_0529200	PF3D7_0529200.1	N/A	Plasmodium falciparum 3D7	Pf3D7_05_v3:1,192,973..1,195,332(+)	sugar transporter, putative	protein coding gene	integral component of membrane;integral component of plasma membrane	carbohydrate:proton symporter activity	carbohydrate transport;organic substance transport	PF13347
PF3D7_0529300	PF3D7_0529300.1	TIC22	Plasmodium falciparum 3D7	Pf3D7_05_v3:1,195,884..1,197,645(+)	apicoplast TIC22 protein	protein coding gene	apicoplast;integral component of membrane	N/A	protein folding	PF04278
PF3D7_0529400	PF3D7_0529400.1	N/A	Plasmodium falciparum 3D7	Pf3D7_05_v3:1,198,563..1,205,743(+)	conserved Plasmodium protein, unknown function	protein coding gene	N/A	N/A	N/A	N/A
PF3D7_0529400	PF3D7_0529400.2	N/A	Plasmodium falciparum 3D7	Pf3D7_05_v3:1,198,563..1,205,743(+)	conserved Plasmodium protein, unknown function	protein coding gene	N/A	N/A	N/A	N/A
PF3D7_0529500	PF3D7_0529500.1	N/A	Plasmodium falciparum 3D7	Pf3D7_05_v3:1,206,043..1,207,830(+)	cell cycle regulator protein, putative	protein coding gene	nucleus	RNA binding	formation of translation preinitiation complex;regulation of cell cycle;translation reinitiation	PF01472;PF17832
PF3D7_0529700	PF3D7_0529700.1	N/A	Plasmodium falciparum 3D7	Pf3D7_05_v3:1,208,695..1,212,893(-)	heptatricopeptide repeat-containing protein, putative	protein coding gene	N/A	N/A	N/A	N/A
PF3D7_0529800	PF3D7_0529800.1	N/A	Plasmodium falciparum 3D7	Pf3D7_05_v3:1,213,104..1,220,543(+)	conserved Plasmodium protein, unknown function	protein coding gene	nucleus	N/A	N/A	N/A
PF3D7_0529900	PF3D7_0529900.1	N/A	Plasmodium falciparum 3D7	Pf3D7_05_v3:1,219,683..1,223,261(-)	RING zinc finger protein, putative	protein coding gene	N/A	N/A	N/A	PF13639
PF3D7_0530000	PF3D7_0530000.1	N/A	Plasmodium falciparum 3D7	Pf3D7_05_v3:1,223,345..1,225,947(-)	conserved Plasmodium protein, unknown function	protein coding gene	N/A	N/A	N/A	N/A
PF3D7_0530100	PF3D7_0530100.1	SYN6	Plasmodium falciparum 3D7	Pf3D7_05_v3:1,225,877..1,228,191(+)	SNARE protein, putative	protein coding gene	SNARE complex;endomembrane system;integral component of membrane	SNAP receptor activity;SNARE binding	intracellular protein transport;vesicle docking;vesicle fusion;vesicle-mediated transport	N/A
PF3D7_0530200	PF3D7_0530200.1	PPT	Plasmodium falciparum 3D7	Pf3D7_05_v3:1,229,052..1,231,469(-)	phosphoenolpyruvate/phosphate translocator	protein coding gene	Golgi apparatus;apicoplast;integral component of plastid inner membrane	GDP-fucose transmembrane transporter activity;antiporter activity;glucose 6-phosphate:inorganic phosphate antiporter activity;nucleotide-sugar transmembrane transporter activity;transmembrane transporter activity;triose-phosphate:phosphate antiporter activity	glucose import	PF03151
PF3D7_0530300	PF3D7_0530300.1	PIC6	Plasmodium falciparum 3D7	Pf3D7_05_v3:1,231,929..1,238,086(+)	PhIL1-interacting candidate PIC6	protein coding gene	inner membrane pellicle complex;integral component of membrane	N/A	N/A	N/A
PF3D7_0530400	PF3D7_0530400.1	N/A	Plasmodium falciparum 3D7	Pf3D7_05_v3:1,238,120..1,243,999(-)	conserved Plasmodium protein, unknown function	protein coding gene	N/A	N/A	N/A	N/A
PF3D7_0530500	PF3D7_0530500.1	N/A	Plasmodium falciparum 3D7	Pf3D7_05_v3:1,244,751..1,248,359(+)	conserved Plasmodium membrane protein, unknown function	protein coding gene	integral component of membrane	N/A	N/A	N/A
PF3D7_0530600	PF3D7_0530600.1	N/A	Plasmodium falciparum 3D7	Pf3D7_05_v3:1,248,232..1,250,252(-)	XAP-5 DNA binding protein, putative	protein coding gene	nucleus	N/A	chromatin organization	PF04921
PF3D7_0530700	PF3D7_0530700.1	N/A	Plasmodium falciparum 3D7	Pf3D7_05_v3:1,250,370..1,254,901(+)	conserved Plasmodium protein, unknown function	protein coding gene	cytoplasm	N/A	N/A	N/A
PF3D7_0530750	PF3D7_0530750.1	DPM3	Plasmodium falciparum 3D7	Pf3D7_05_v3:1,254,200..1,255,290(-)	dolichol-phosphate mannosyltransferase subunit 3, putative	protein coding gene	dolichol-phosphate-mannose synthase complex	N/A	GPI anchor biosynthetic process	PF08285
PF3D7_0530800	PF3D7_0530800.1	N/A	Plasmodium falciparum 3D7	Pf3D7_05_v3:1,255,012..1,257,579(+)	CPW-WPC family protein	protein coding gene	Maurer's cleft	N/A	N/A	PF09717
PF3D7_0530900	PF3D7_0530900.1	FRM1	Plasmodium falciparum 3D7	Pf3D7_05_v3:1,257,680..1,266,372(-)	formin 1	protein coding gene	apical part of cell;bicellular tight junction	actin binding	actin cytoskeleton organization;actin nucleation;actin polymerization or depolymerization	PF02181
PF3D7_0531000	PF3D7_0531000.1	N/A	Plasmodium falciparum 3D7	Pf3D7_05_v3:1,266,892..1,269,589(+)	SURF1 domain-containing protein, putative	protein coding gene	mitochondrion	N/A	N/A	PF02104
PF3D7_0531100	PF3D7_0531100.1	N/A	Plasmodium falciparum 3D7	Pf3D7_05_v3:1,269,832..1,278,893(-)	conserved Plasmodium protein, unknown function	protein coding gene	N/A	N/A	N/A	N/A
PF3D7_0531200	PF3D7_0531200.1	N/A	Plasmodium falciparum 3D7	Pf3D7_05_v3:1,279,189..1,280,883(-)	ribosomal protein S16, mitochondrial, putative	protein coding gene	mitochondrial small ribosomal subunit;small ribosomal subunit	structural constituent of ribosome	N/A	PF00886
PF3D7_0531300	PF3D7_0531300.1	N/A	Plasmodium falciparum 3D7	Pf3D7_05_v3:1,281,104..1,282,484(+)	conserved Plasmodium protein, unknown function	protein coding gene	N/A	N/A	N/A	N/A
PF3D7_0531400	PF3D7_0531400.1	N/A	Plasmodium falciparum 3D7	Pf3D7_05_v3:1,282,377..1,286,689(-)	G-patch domain-containing protein, putative	protein coding gene	U2-type post-mRNA release spliceosomal complex	N/A	spliceosomal complex disassembly	PF01585
PF3D7_0532100	PF3D7_0532100.1	ETRAMP5	Plasmodium falciparum 3D7	Pf3D7_05_v3:1,300,188..1,302,740(+)	early transcribed membrane protein 5	protein coding gene	symbiont-containing vacuole membrane	protein binding	N/A	PF09716
PF3D7_0532200	PF3D7_0532200.1	N/A	Plasmodium falciparum 3D7	Pf3D7_05_v3:1,303,429..1,304,634(-)	Plasmodium exported protein (PHISTc), unknown function	protein coding gene	host cell	N/A	N/A	PF09687
PF3D7_0532300	PF3D7_0532300.1	N/A	Plasmodium falciparum 3D7	Pf3D7_05_v3:1,307,099..1,310,572(+)	Plasmodium exported protein (PHISTb), unknown function	protein coding gene	Maurer's cleft;host cell cytoplasm;host cell surface;nucleus	protein binding	N/A	PF09687
PF3D7_0532400	PF3D7_0532400.1	LyMP	Plasmodium falciparum 3D7	Pf3D7_05_v3:1,311,992..1,315,355(+)	lysine-rich membrane-associated PHISTb protein	protein coding gene	Maurer's cleft;host cell cytoplasm;host cell cytosol;host cell membrane;host cell periphery;host cell surface;infected host cell surface knob;nucleus	protein binding	cytoadherence to microvasculature, mediated by symbiont protein	PF09687
PF3D7_0532500	PF3D7_0532500.1	N/A	Plasmodium falciparum 3D7	Pf3D7_05_v3:1,316,238..1,316,874(+)	Plasmodium exported protein, unknown function	protein coding gene	host cell	N/A	N/A	N/A
PF3D7_0532600	PF3D7_0532600.1	N/A	Plasmodium falciparum 3D7	Pf3D7_05_v3:1,317,882..1,319,382(-)	Plasmodium exported protein, unknown function	protein coding gene	Maurer's cleft;host cell cytosol	N/A	N/A	N/A
PF3D7_0532900	PF3D7_0532900.1	RIF	Plasmodium falciparum 3D7	Pf3D7_05_v3:1,326,245..1,327,429(+)	rifin	protein coding gene	host cell plasma membrane	N/A	antigenic variation	PF02009
PF3D7_0600200	PF3D7_0600200.1	VAR	Plasmodium falciparum 3D7	Pf3D7_06_v3:3,503..12,835(+)	erythrocyte membrane protein 1, PfEMP1	protein coding gene	host cell plasma membrane;infected host cell surface knob	cell adhesion molecule binding	antigenic variation;cell-cell adhesion;cytoadherence to microvasculature, mediated by symbiont protein;modulation by symbiont of host erythrocyte aggregation	PF03011;PF05424;PF15445;PF15447
PF3D7_0600300	PF3D7_0600300.1	RIF	Plasmodium falciparum 3D7	Pf3D7_06_v3:15,065..16,410(-)	rifin	protein coding gene	Maurer's cleft;host cell plasma membrane;symbiont-containing vacuole	N/A	antigenic variation;cytoadherence to microvasculature, mediated by symbiont protein;modulation by symbiont of host erythrocyte aggregation	PF02009
PF3D7_0600400	PF3D7_0600400.1	VAR	Plasmodium falciparum 3D7	Pf3D7_06_v3:17,777..23,068(-)	erythrocyte membrane protein 1, PfEMP1	protein coding gene	N/A	N/A	N/A	PF05424;PF15445;PF15447
PF3D7_0600500	PF3D7_0600500.1	RIF	Plasmodium falciparum 3D7	Pf3D7_06_v3:26,557..27,830(+)	rifin	protein coding gene	Maurer's cleft;host cell plasma membrane;symbiont-containing vacuole	N/A	antigenic variation;cytoadherence to microvasculature, mediated by symbiont protein;modulation by symbiont of host erythrocyte aggregation	PF02009
PF3D7_0600600	PF3D7_0600600.1	VAR	Plasmodium falciparum 3D7	Pf3D7_06_v3:29,618..31,484(-)	erythrocyte membrane protein 1 (PfEMP1), exon 2	protein coding gene	N/A	N/A	N/A	PF15445
PF3D7_0600700	PF3D7_0600700.1	RIF	Plasmodium falciparum 3D7	Pf3D7_06_v3:31,965..33,244(-)	rifin	protein coding gene	Maurer's cleft;host cell plasma membrane;symbiont-containing vacuole	N/A	antigenic variation;cytoadherence to microvasculature, mediated by symbiont protein;modulation by symbiont of host erythrocyte aggregation	PF02009
PF3D7_0601000	PF3D7_0601000.1	EPF4	Plasmodium falciparum 3D7	Pf3D7_06_v3:42,097..43,218(-)	exported protein family 4	protein coding gene	Maurer's cleft	N/A	N/A	N/A
PF3D7_0601100	PF3D7_0601100.1	EPF3	Plasmodium falciparum 3D7	Pf3D7_06_v3:44,450..45,216(+)	exported protein family 3	protein coding gene	Maurer's cleft	N/A	N/A	PF09715
PF3D7_0601200	PF3D7_0601200.1	MC-2TM	Plasmodium falciparum 3D7	Pf3D7_06_v3:47,172..48,600(+)	Pfmc-2TM Maurer's cleft two transmembrane protein	protein coding gene	Maurer's cleft	N/A	N/A	N/A
PF3D7_0601300	PF3D7_0601300.1	EPF1	Plasmodium falciparum 3D7	Pf3D7_06_v3:48,874..49,722(-)	exported protein family 1	protein coding gene	Maurer's cleft	N/A	N/A	PF14308
PF3D7_0601500	PF3D7_0601500.1	N/A	Plasmodium falciparum 3D7	Pf3D7_06_v3:64,746..67,786(-)	Plasmodium exported protein (PHISTb), unknown function	protein coding gene	host cell	N/A	N/A	PF09687
PF3D7_0601600	PF3D7_0601600.1	N/A	Plasmodium falciparum 3D7	Pf3D7_06_v3:68,698..70,201(-)	tetratricopeptide repeat protein, putative	protein coding gene	anaphase-promoting complex;cytoplasm	N/A	anaphase-promoting complex-dependent catabolic process;cell division;metaphase/anaphase transition of mitotic cell cycle;positive regulation of mitotic metaphase/anaphase transition;protein ubiquitination	PF13181
PF3D7_0601900	PF3D7_0601900.1	N/A	Plasmodium falciparum 3D7	Pf3D7_06_v3:76,204..79,596(+)	conserved Plasmodium protein, unknown function	protein coding gene	Maurer's cleft;apicoplast;extracellular vesicle;nucleus	protein binding	N/A	N/A
PF3D7_0602000	PF3D7_0602000.1	N/A	Plasmodium falciparum 3D7	Pf3D7_06_v3:81,532..88,869(-)	zinc finger protein, putative	protein coding gene	N/A	N/A	N/A	N/A
PF3D7_0602100	PF3D7_0602100.1	MTR4	Plasmodium falciparum 3D7	Pf3D7_06_v3:91,725..97,247(+)	ATP-dependent RNA helicase MTR4	protein coding gene	TRAMP complex;nuclear periphery;nucleus	RNA helicase activity;protein binding	RNA catabolic process;maturation of 5.8S rRNA	PF00270;PF00271;PF08148;PF13234
PF3D7_0602200	PF3D7_0602200.1	N/A	Plasmodium falciparum 3D7	Pf3D7_06_v3:97,494..99,410(+)	MYND-type zinc finger protein, putative	protein coding gene	N/A	N/A	N/A	PF01753
PF3D7_0602300	PF3D7_0602300.1	PALM	Plasmodium falciparum 3D7	Pf3D7_06_v3:99,781..100,725(+)	liver merozoite formation protein, putative	protein coding gene	apicoplast	N/A	N/A	N/A
PF3D7_0602400	PF3D7_0602400.1	EF-G	Plasmodium falciparum 3D7	Pf3D7_06_v3:101,350..104,706(-)	elongation factor G	protein coding gene	apicoplast;mitochondrion	GTPase activity;translation elongation factor activity	mitochondrial translation;ribosome disassembly;translational elongation	PF00009;PF00679;PF03144;PF03764;PF14492
PF3D7_0602500	PF3D7_0602500.1	N/A	Plasmodium falciparum 3D7	Pf3D7_06_v3:105,022..107,401(+)	geranylgeranyl transferase type-2 subunit beta, putative	protein coding gene	Rab-protein geranylgeranyltransferase complex	Rab geranylgeranyltransferase activity;protein geranylgeranyltransferase activity	protein geranylgeranylation;protein prenylation	PF00432
PF3D7_0602600	PF3D7_0602600.1	N/A	Plasmodium falciparum 3D7	Pf3D7_06_v3:106,703..112,376(-)	SAC3 domain-containing protein, putative	protein coding gene	cytoplasm;nucleus;transcription export complex 2	N/A	mRNA export from nucleus	PF03399
PF3D7_0602700	PF3D7_0602700.1	N/A	Plasmodium falciparum 3D7	Pf3D7_06_v3:113,592..115,478(-)	conserved Plasmodium protein, unknown function	protein coding gene	N/A	N/A	N/A	N/A
PF3D7_0602800	PF3D7_0602800.1	JmjC2	Plasmodium falciparum 3D7	Pf3D7_06_v3:115,789..118,379(+)	JmjC domain-containing protein 2, putative	protein coding gene	N/A	2-oxoglutarate-dependent dioxygenase activity	N/A	PF13621
PF3D7_0602900	PF3D7_0602900.1	N/A	Plasmodium falciparum 3D7	Pf3D7_06_v3:118,239..120,929(-)	conserved Plasmodium protein, unknown function	protein coding gene	N/A	N/A	N/A	N/A
PF3D7_0603000	PF3D7_0603000.1	N/A	Plasmodium falciparum 3D7	Pf3D7_06_v3:121,248..124,846(+)	SDE2 domain-containing protein, putative	protein coding gene	nucleus	N/A	N/A	PF13019
PF3D7_0603100	PF3D7_0603100.1	N/A	Plasmodium falciparum 3D7	Pf3D7_06_v3:125,002..127,010(-)	RNA-binding protein, putative	protein coding gene	N/A	N/A	N/A	N/A
PF3D7_0603200	PF3D7_0603200.1	BCS1	Plasmodium falciparum 3D7	Pf3D7_06_v3:128,292..130,385(+)	mitochondrial chaperone BCS1, putative	protein coding gene	mitochondrial inner membrane;mitochondrion	ATP hydrolysis activity	chaperone-mediated protein complex assembly;protein-containing complex assembly	PF00004;PF08740
PF3D7_0603300	PF3D7_0603300.1	DHODH	Plasmodium falciparum 3D7	Pf3D7_06_v3:130,191..132,792(-)	dihydroorotate dehydrogenase	protein coding gene	mitochondrial inner membrane;mitochondrion	dihydroorotate dehydrogenase activity	'de novo' pyrimidine nucleobase biosynthetic process;pyrimidine ribonucleotide biosynthetic process;response to drug;response to xenobiotic stimulus	PF01180
PF3D7_0603400	PF3D7_0603400.1	TEX1	Plasmodium falciparum 3D7	Pf3D7_06_v3:132,888..138,199(-)	trophozoite exported protein 1	protein coding gene	Maurer's cleft	ubiquitin protein ligase activity	proteasome-mediated ubiquitin-dependent protein catabolic process	PF13920
PF3D7_0603500	PF3D7_0603500.1	CAX	Plasmodium falciparum 3D7	Pf3D7_06_v3:138,667..141,013(+)	cation/H+ antiporter	protein coding gene	integral component of membrane;mitochondrion	calcium, potassium:sodium antiporter activity;calcium:proton antiporter activity	calcium ion transmembrane transport;calcium ion transport;cellular calcium ion homeostasis	PF01699
PF3D7_0603600	PF3D7_0603600.1	N/A	Plasmodium falciparum 3D7	Pf3D7_06_v3:140,777..149,585(-)	AT-rich interactive domain-containing protein, putative	protein coding gene	N/A	N/A	N/A	PF01388
PF3D7_0603700	PF3D7_0603700.1	mFRS	Plasmodium falciparum 3D7	Pf3D7_06_v3:150,279..152,471(+)	phenylalanine--tRNA ligase	protein coding gene	cytoplasm;mitochondrion	phenylalanine-tRNA ligase activity	phenylalanyl-tRNA aminoacylation	PF01409;PF03147
PF3D7_0603800	PF3D7_0603800.1	CEP76	Plasmodium falciparum 3D7	Pf3D7_06_v3:152,505..160,682(-)	NdP2 protein, putative	protein coding gene	apical part of cell;centrosome;cytoplasm;nucleus	N/A	N/A	N/A
PF3D7_0603900	PF3D7_0603900.1	N/A	Plasmodium falciparum 3D7	Pf3D7_06_v3:160,825..162,616(-)	conserved Plasmodium protein, unknown function	protein coding gene	N/A	N/A	N/A	N/A
PF3D7_0604000	PF3D7_0604000.1	N/A	Plasmodium falciparum 3D7	Pf3D7_06_v3:163,582..170,363(-)	conserved Plasmodium protein, unknown function	protein coding gene	N/A	N/A	N/A	N/A
PF3D7_0604100	PF3D7_0604100.1	SIP2	Plasmodium falciparum 3D7	Pf3D7_06_v3:170,776..178,985(-)	AP2 domain transcription factor	protein coding gene	nuclear periphery;nucleus	sequence-specific DNA binding;telomeric DNA binding	N/A	N/A
PF3D7_0604200	PF3D7_0604200.1	N/A	Plasmodium falciparum 3D7	Pf3D7_06_v3:180,607..181,669(+)	ribosomal protein L41, mitochondrial, putative	protein coding gene	mitochondrial large ribosomal subunit;mitochondrion	structural constituent of ribosome	translation	PF09809
PF3D7_0604300	PF3D7_0604300.1	N/A	Plasmodium falciparum 3D7	Pf3D7_06_v3:181,680..184,760(+)	conserved Plasmodium protein, unknown function	protein coding gene	N/A	N/A	N/A	N/A
PF3D7_0604400	PF3D7_0604400.1	N/A	Plasmodium falciparum 3D7	Pf3D7_06_v3:184,892..185,843(+)	conserved protein, unknown function	protein coding gene	apicoplast	N/A	N/A	N/A
PF3D7_0604500	PF3D7_0604500.1	N/A	Plasmodium falciparum 3D7	Pf3D7_06_v3:188,237..198,546(+)	GYF domain-containing protein, putative	protein coding gene	nucleus	mRNA binding	N/A	PF02213
PF3D7_0604600	PF3D7_0604600.1	N/A	Plasmodium falciparum 3D7	Pf3D7_06_v3:198,862..204,355(+)	DNA helicase, putative	protein coding gene	nuclear replication fork;nucleus	ATP-dependent DNA/DNA annealing activity;ATP-dependent activity, acting on DNA;DNA helicase activity;endodeoxyribonuclease activity	DNA repair;DNA rewinding;cellular response to DNA damage stimulus;replication fork processing;replication fork protection	PF00176;PF00271;PF01844
PF3D7_0604700	PF3D7_0604700.1	GILP	Plasmodium falciparum 3D7	Pf3D7_06_v3:204,545..206,720(-)	glyoxalase I-like protein GILP	protein coding gene	apicoplast;cytoplasm	lactoylglutathione lyase activity	methylglyoxal catabolic process to D-lactate via S-lactoyl-glutathione;methylglyoxal metabolic process	PF00903
PF3D7_0604800	PF3D7_0604800.1	N/A	Plasmodium falciparum 3D7	Pf3D7_06_v3:206,807..211,802(-)	RAP protein, putative	protein coding gene	N/A	N/A	N/A	PF08373
PF3D7_0604900	PF3D7_0604900.1	N/A	Plasmodium falciparum 3D7	Pf3D7_06_v3:212,174..213,397(-)	conserved Plasmodium protein, unknown function	protein coding gene	apicoplast	N/A	N/A	N/A
PF3D7_0605000	PF3D7_0605000.1	N/A	Plasmodium falciparum 3D7	Pf3D7_06_v3:213,348..214,430(+)	50S ribosomal protein L24, putative	protein coding gene	cytosolic large ribosomal subunit;mitochondrion	structural constituent of ribosome	translation	PF00467;PF17136
PF3D7_0605100	PF3D7_0605100.1	KH1	Plasmodium falciparum 3D7	Pf3D7_06_v3:215,004..220,338(+)	KH domain-containing protein, putative	protein coding gene	cytoplasm;nucleus	N6-methyladenosine-containing RNA binding;RNA binding;mRNA binding	regulation of gene expression	PF00013
PF3D7_0605200	PF3D7_0605200.1	N/A	Plasmodium falciparum 3D7	Pf3D7_06_v3:220,100..221,977(-)	acylphosphatase, putative	protein coding gene	mitochondrion	N/A	N/A	N/A
PF3D7_0605300	PF3D7_0605300.1	ARK1	Plasmodium falciparum 3D7	Pf3D7_06_v3:222,150..224,529(+)	serine/threonine protein kinase ARK1	protein coding gene	nucleus;spindle pole body	N/A	schizogony	PF00069
PF3D7_0605400	PF3D7_0605400.1	N/A	Plasmodium falciparum 3D7	Pf3D7_06_v3:224,446..225,095(-)	calcium-binding protein, putative	protein coding gene	N/A	N/A	N/A	PF13499
PF3D7_0605500	PF3D7_0605500.1	N/A	Plasmodium falciparum 3D7	Pf3D7_06_v3:225,346..227,905(-)	cyclin dependent kinase binding protein, putative	protein coding gene	N/A	N/A	regulation of cell cycle	PF00134
PF3D7_0605600	PF3D7_0605600.1	N/A	Plasmodium falciparum 3D7	Pf3D7_06_v3:228,132..234,835(-)	nucleoside diphosphate kinase, putative	protein coding gene	N/A	nucleoside diphosphate kinase activity	CTP biosynthetic process;GTP biosynthetic process;UTP biosynthetic process	PF00334
PF3D7_0605700	PF3D7_0605700.1	N/A	Plasmodium falciparum 3D7	Pf3D7_06_v3:236,397..237,251(+)	conserved Plasmodium protein, unknown function	protein coding gene	N/A	N/A	N/A	N/A
PF3D7_0605800	PF3D7_0605800.1	RAD50	Plasmodium falciparum 3D7	Pf3D7_06_v3:237,355..246,015(-)	DNA repair protein RAD50, putative	protein coding gene	Mre11 complex;condensed nuclear chromosome;nucleus;site of double-strand break	G-quadruplex DNA binding;adenylate kinase activity;double-stranded DNA binding;double-stranded telomeric DNA binding;protein binding;single-stranded DNA endodeoxyribonuclease activity;single-stranded telomeric DNA binding	DNA duplex unwinding;chromosome organization involved in meiotic cell cycle;double-strand break repair;nucleic acid phosphodiester bond hydrolysis;telomere capping;telomere maintenance via recombination;telomere maintenance via telomerase	PF13476
PF3D7_0605900	PF3D7_0605900.1	N/A	Plasmodium falciparum 3D7	Pf3D7_06_v3:246,321..249,977(+)	elongation of fatty acids protein, putative	protein coding gene	endoplasmic reticulum;integral component of endoplasmic reticulum membrane;integral component of membrane	fatty acid elongase activity	fatty acid elongation, monounsaturated fatty acid;fatty acid elongation, polyunsaturated fatty acid;fatty acid elongation, saturated fatty acid;fatty acid elongation, unsaturated fatty acid;sphingolipid biosynthetic process;very long-chain fatty acid biosynthetic process	PF01151
PF3D7_0606000	PF3D7_0606000.1	KIC1	Plasmodium falciparum 3D7	Pf3D7_06_v3:249,666..255,695(-)	protein KIC1	protein coding gene	nucleus	N/A	N/A	N/A
PF3D7_0606100	PF3D7_0606100.1	N/A	Plasmodium falciparum 3D7	Pf3D7_06_v3:257,163..260,505(+)	RNA-binding protein, putative	protein coding gene	NELF complex	RNA binding	negative regulation of transcription elongation from RNA polymerase II promoter	PF00076
PF3D7_0606200	PF3D7_0606200.1	PEX4	Plasmodium falciparum 3D7	Pf3D7_06_v3:260,228..262,593(-)	ubiquitin-conjugating enzyme E2 PEX4, putative	protein coding gene	nucleus	ubiquitin conjugating enzyme activity	protein polyubiquitination	PF00179
PF3D7_0606300	PF3D7_0606300.1	N/A	Plasmodium falciparum 3D7	Pf3D7_06_v3:262,635..263,857(+)	conserved Plasmodium protein, unknown function	protein coding gene	N/A	N/A	N/A	N/A
PF3D7_0606400	PF3D7_0606400.1	N/A	Plasmodium falciparum 3D7	Pf3D7_06_v3:263,936..264,830(-)	conserved Plasmodium protein, unknown function	protein coding gene	N/A	N/A	N/A	N/A
PF3D7_0606500	PF3D7_0606500.1	PTB	Plasmodium falciparum 3D7	Pf3D7_06_v3:264,901..269,898(-)	polypyrimidine tract-binding protein, putative	protein coding gene	nucleus	mRNA binding;poly-pyrimidine tract binding	RNA splicing;regulation of RNA splicing;regulation of translation	PF00076;PF11835;PF13893
PF3D7_0606600	PF3D7_0606600.1	N/A	Plasmodium falciparum 3D7	Pf3D7_06_v3:270,150..279,739(-)	conserved Plasmodium protein, unknown function	protein coding gene	P-body;nucleus	N/A	deadenylation-independent decapping of nuclear-transcribed mRNA	N/A
PF3D7_0606700	PF3D7_0606700.1	N/A	Plasmodium falciparum 3D7	Pf3D7_06_v3:281,991..287,880(+)	coatomer alpha subunit, putative	protein coding gene	COPI vesicle coat;nucleus	N/A	endoplasmic reticulum to Golgi vesicle-mediated transport;intra-Golgi vesicle-mediated transport;intracellular protein transport;retrograde vesicle-mediated transport, Golgi to endoplasmic reticulum	PF00400;PF04053;PF06957
PF3D7_0606800	PF3D7_0606800.1	VFT1	Plasmodium falciparum 3D7	Pf3D7_06_v3:287,041..289,722(-)	VFT protein	protein coding gene	cell surface	N/A	N/A	N/A
PF3D7_0606900	PF3D7_0606900.1	GLP2	Plasmodium falciparum 3D7	Pf3D7_06_v3:290,146..292,628(-)	glutaredoxin-like protein	protein coding gene	cytosol;mitochondrial matrix;mitochondrion;nucleus	N/A	N/A	PF00462
PF3D7_0607000	PF3D7_0607000.1	N/A	Plasmodium falciparum 3D7	Pf3D7_06_v3:291,965..297,805(+)	translation initiation factor IF-2, putative	protein coding gene	nucleus	translation initiation factor activity	translational initiation	PF00009;PF11987
PF3D7_0607100	PF3D7_0607100.1	N/A	Plasmodium falciparum 3D7	Pf3D7_06_v3:297,941..301,197(+)	MYND-type zinc finger protein, putative	protein coding gene	cytoplasm;nucleus	DNA binding	negative regulation of transcription by RNA polymerase II	PF01753
PF3D7_0607200	PF3D7_0607200.1	N/A	Plasmodium falciparum 3D7	Pf3D7_06_v3:301,304..303,478(-)	RING zinc finger protein, putative	protein coding gene	N/A	N/A	N/A	PF13639
PF3D7_0607300	PF3D7_0607300.1	UROD	Plasmodium falciparum 3D7	Pf3D7_06_v3:304,088..306,392(+)	uroporphyrinogen III decarboxylase	protein coding gene	apicoplast;cytosol	uroporphyrinogen decarboxylase activity	heme biosynthetic process	PF01208
PF3D7_0607400	PF3D7_0607400.1	N/A	Plasmodium falciparum 3D7	Pf3D7_06_v3:306,360..310,500(-)	G-protein associated signal transduction protein, putative	protein coding gene	Golgi apparatus;cytoplasm;integral component of membrane;plasma membrane	inositol hexakisphosphate binding;phosphate ion transmembrane transporter activity	cellular response to phosphate starvation;phosphate ion transport	PF03124
PF3D7_0607500	PF3D7_0607500.1	COQ2	Plasmodium falciparum 3D7	Pf3D7_06_v3:310,779..313,770(+)	4-hydroxybenzoate polyprenyltransferase, putative	protein coding gene	integral component of mitochondrial inner membrane;integral component of mitochondrial membrane;mitochondrion	4-hydroxybenzoate octaprenyltransferase activity;transferase activity, transferring alkyl or aryl (other than methyl) groups	ubiquinone biosynthetic process;ubiquinone metabolic process	PF01040
PF3D7_0607600	PF3D7_0607600.1	SAS6	Plasmodium falciparum 3D7	Pf3D7_06_v3:311,667..318,394(-)	spindle assembly abnormal protein 6, putative	protein coding gene	centriole;nucleus	N/A	mitotic spindle organization	PF16531
PF3D7_0607700	PF3D7_0607700.1	N/A	Plasmodium falciparum 3D7	Pf3D7_06_v3:319,519..329,442(+)	conserved Plasmodium protein, unknown function	protein coding gene	N/A	N/A	N/A	PF14418
PF3D7_0607800	PF3D7_0607800.1	N/A	Plasmodium falciparum 3D7	Pf3D7_06_v3:329,254..332,013(-)	GTP-binding protein, putative	protein coding gene	mitochondrion	N/A	N/A	PF01018
PF3D7_0607900	PF3D7_0607900.1	N/A	Plasmodium falciparum 3D7	Pf3D7_06_v3:332,329..335,631(+)	conserved Plasmodium protein, unknown function	protein coding gene	apicoplast;preribosome, large subunit precursor	rRNA binding	ribosomal large subunit assembly	N/A
PF3D7_0608000	PF3D7_0608000.1	DPH7	Plasmodium falciparum 3D7	Pf3D7_06_v3:335,107..337,484(-)	diphthine methyltransferase, putative	protein coding gene	cytoplasm;endosome	demethylase activity	demethylation	PF00400
PF3D7_0608100	PF3D7_0608100.1	N/A	Plasmodium falciparum 3D7	Pf3D7_06_v3:336,465..342,148(+)	conserved Plasmodium protein, unknown function	protein coding gene	apicoplast	N/A	N/A	N/A
PF3D7_0608200	PF3D7_0608200.1	N/A	Plasmodium falciparum 3D7	Pf3D7_06_v3:341,804..342,871(-)	conserved Plasmodium protein, unknown function	protein coding gene	N/A	N/A	N/A	N/A
PF3D7_0608300	PF3D7_0608300.1	N/A	Plasmodium falciparum 3D7	Pf3D7_06_v3:342,351..347,812(+)	heptatricopeptide repeat-containing protein, putative	protein coding gene	N/A	N/A	N/A	N/A
PF3D7_0608310	PF3D7_0608310.1	SAM50	Plasmodium falciparum 3D7	Pf3D7_06_v3:347,997..349,756(+)	sorting assembly machinery 50 kDa subunit, putative	protein coding gene	SAM complex;integral component of membrane;mitochondrion	N/A	cellular protein-containing complex assembly;protein insertion into mitochondrial outer membrane	N/A
PF3D7_0608400	PF3D7_0608400.1	C4AP4	Plasmodium falciparum 3D7	Pf3D7_06_v3:349,769..350,541(-)	respiratory chain complex 4 associated protein 4	protein coding gene	mitochondrion;respiratory chain complex IV	N/A	N/A	N/A
PF3D7_0608500	PF3D7_0608500.1	N/A	Plasmodium falciparum 3D7	Pf3D7_06_v3:350,697..353,774(-)	proteasome subunit alpha type-2, putative	protein coding gene	cytoplasm;extracellular vesicle;nucleus;proteasome core complex;proteasome core complex, alpha-subunit complex	endopeptidase activity	proteasomal protein catabolic process;proteasomal ubiquitin-independent protein catabolic process;proteasome-mediated ubiquitin-dependent protein catabolic process;ubiquitin-dependent protein catabolic process	PF00227;PF10584
PF3D7_0608600	PF3D7_0608600.1	N/A	Plasmodium falciparum 3D7	Pf3D7_06_v3:354,683..356,424(+)	conserved Plasmodium protein, unknown function	protein coding gene	N/A	N/A	N/A	N/A
PF3D7_0608700	PF3D7_0608700.1	CCT6	Plasmodium falciparum 3D7	Pf3D7_06_v3:357,303..361,171(+)	T-complex protein 1 subunit zeta	protein coding gene	chaperonin-containing T-complex;cytosol;nucleus	unfolded protein binding	protein folding	PF00118
PF3D7_0608800	PF3D7_0608800.1	OAT	Plasmodium falciparum 3D7	Pf3D7_06_v3:361,326..363,964(+)	ornithine aminotransferase	protein coding gene	cytoplasm;extracellular vesicle;food vacuole;intracellular;mitochondrion	RNA binding;identical protein binding;ornithine-oxo-acid transaminase activity;protein binding;pyridoxal phosphate binding	arginine catabolic process to glutamate;arginine catabolic process to proline via ornithine;ornithine metabolic process	PF00202
PF3D7_0608900	PF3D7_0608900.1	N/A	Plasmodium falciparum 3D7	Pf3D7_06_v3:363,994..368,548(+)	conserved Plasmodium protein, unknown function	protein coding gene	N/A	N/A	N/A	N/A
PF3D7_0609000	PF3D7_0609000.1	NUP637	Plasmodium falciparum 3D7	Pf3D7_06_v3:369,043..388,626(+)	nucleoporin NUP637, putative	protein coding gene	nucleus	N/A	N/A	N/A
PF3D7_0609100	PF3D7_0609100.1	ZIP1	Plasmodium falciparum 3D7	Pf3D7_06_v3:388,540..392,142(-)	zinc transporter ZIP1, putative	protein coding gene	integral component of membrane;membrane	zinc ion transmembrane transporter activity	zinc ion transmembrane transport	PF02535
PF3D7_0609200	PF3D7_0609200.1	N/A	Plasmodium falciparum 3D7	Pf3D7_06_v3:392,371..394,770(+)	citrate synthase-like protein, putative	protein coding gene	mitochondrial matrix	citrate (Si)-synthase activity	carbohydrate metabolic process;tricarboxylic acid cycle	PF00285
PF3D7_0609300	PF3D7_0609300.1	N/A	Plasmodium falciparum 3D7	Pf3D7_06_v3:396,165..399,337(+)	conserved Plasmodium protein, unknown function	protein coding gene	N/A	N/A	N/A	N/A
PF3D7_0609400	PF3D7_0609400.1	CLS	Plasmodium falciparum 3D7	Pf3D7_06_v3:399,357..402,112(-)	mitochondrial cardiolipin synthase, putative	protein coding gene	mitochondrion	N/A	N/A	PF13091
PF3D7_0609500	PF3D7_0609500.1	N/A	Plasmodium falciparum 3D7	Pf3D7_06_v3:402,722..407,242(+)	conserved Plasmodium protein, unknown function	protein coding gene	N/A	N/A	N/A	N/A
PF3D7_0609600	PF3D7_0609600.1	N/A	Plasmodium falciparum 3D7	Pf3D7_06_v3:408,041..412,002(+)	conserved Plasmodium protein, unknown function	protein coding gene	N/A	N/A	N/A	N/A
PF3D7_0609700	PF3D7_0609700.1	KIC6	Plasmodium falciparum 3D7	Pf3D7_06_v3:412,443..420,258(+)	protein KIC6	protein coding gene	N/A	N/A	N/A	N/A
PF3D7_0609800	PF3D7_0609800.1	DHHC2	Plasmodium falciparum 3D7	Pf3D7_06_v3:420,422..423,142(-)	palmitoyltransferase DHHC2, putative	protein coding gene	Golgi apparatus;cytoplasm;endoplasmic reticulum;inner membrane pellicle complex;integral component of membrane	nucleic acid binding;palmitoyltransferase activity;protein-cysteine S-palmitoyltransferase activity	peptidyl-L-cysteine S-palmitoylation;protein palmitoylation;protein targeting to membrane	PF01529
PF3D7_0609900	PF3D7_0609900.1	N/A	Plasmodium falciparum 3D7	Pf3D7_06_v3:423,862..432,332(+)	conserved Plasmodium protein, unknown function	protein coding gene	transcription factor TFIIIC complex	N/A	transcription by RNA polymerase III	N/A
PF3D7_0610000	PF3D7_0610000.1	N/A	Plasmodium falciparum 3D7	Pf3D7_06_v3:432,378..434,270(+)	ribosomal protein L19, mitochondrial, putative	protein coding gene	mitochondrial large ribosomal subunit;mitochondrion	structural constituent of ribosome	N/A	PF01245
PF3D7_0610100	PF3D7_0610100.1	SLU7	Plasmodium falciparum 3D7	Pf3D7_06_v3:434,240..436,684(-)	pre-mRNA-splicing factor SLU7, putative	protein coding gene	spliceosomal complex	N/A	RNA splicing;RNA splicing, via transesterification reactions;generation of catalytic spliceosome for second transesterification step	PF11708
PF3D7_0610200	PF3D7_0610200.1	RBM25	Plasmodium falciparum 3D7	Pf3D7_06_v3:437,200..440,881(-)	RNA-binding protein 25, putative	protein coding gene	nucleus	N/A	N/A	PF00076;PF01480
PF3D7_0610400	PF3D7_0610400.1	H3	Plasmodium falciparum 3D7	Pf3D7_06_v3:444,363..445,584(+)	histone H3	protein coding gene	extracellular vesicle;nucleosome;nucleus;symbiont-containing vacuole	DNA binding;RNA binding	chromatin assembly or disassembly;chromosome organization	PF00125
PF3D7_0610500	PF3D7_0610500.1	N/A	Plasmodium falciparum 3D7	Pf3D7_06_v3:444,549..446,775(-)	peptidyl-tRNA hydrolase PTRHD1, putative	protein coding gene	N/A	N/A	N/A	PF01981
PF3D7_0610600	PF3D7_0610600.1	CDPK2	Plasmodium falciparum 3D7	Pf3D7_06_v3:449,004..452,099(+)	calcium-dependent protein kinase 2	protein coding gene	N/A	calcium-dependent protein serine/threonine kinase activity	protein phosphorylation	PF00069;PF13499
PF3D7_0610700	PF3D7_0610700.1	N/A	Plasmodium falciparum 3D7	Pf3D7_06_v3:452,476..453,446(+)	conserved Plasmodium protein, unknown function	protein coding gene	N/A	N/A	N/A	N/A
PF3D7_0610800	PF3D7_0610800.1	TK	Plasmodium falciparum 3D7	Pf3D7_06_v3:453,671..456,422(+)	transketolase	protein coding gene	Maurer's cleft;cytoplasm;cytosol;nucleus	transketolase activity	pentose-phosphate shunt	PF00456;PF02779
PF3D7_0610900	PF3D7_0610900.1	SPT5	Plasmodium falciparum 3D7	Pf3D7_06_v3:456,064..460,886(-)	transcription elongation factor SPT5, putative	protein coding gene	DSIF complex;nucleus	mRNA binding	regulation of transcription by RNA polymerase II;transcription elongation from RNA polymerase II promoter;transcription, DNA-templated	PF03439
PF3D7_0611000	PF3D7_0611000.1	N/A	Plasmodium falciparum 3D7	Pf3D7_06_v3:463,021..465,127(-)	SNARE associated Golgi protein, putative	protein coding gene	N/A	N/A	N/A	PF09335
PF3D7_0611100	PF3D7_0611100.1	SDH3	Plasmodium falciparum 3D7	Pf3D7_06_v3:466,047..466,537(-)	succinate dehydrogenase subunit 3, putative	protein coding gene	N/A	N/A	N/A	N/A
PF3D7_0611200	PF3D7_0611200.1	AP2-EXP2	Plasmodium falciparum 3D7	Pf3D7_06_v3:467,227..469,157(+)	AP2 domain transcription factor AP2-EXP2	protein coding gene	mitochondrion;nuclear periphery	DNA-binding transcription factor activity	regulation of transcription, DNA-templated	PF00847
PF3D7_0611300	PF3D7_0611300.1	ATPTG2	Plasmodium falciparum 3D7	Pf3D7_06_v3:469,685..471,521(+)	ATP synthase-associated protein, putative	protein coding gene	mitochondrion;nucleus	N/A	N/A	N/A
PF3D7_0611400	PF3D7_0611400.1	SWIB	Plasmodium falciparum 3D7	Pf3D7_06_v3:471,256..474,637(-)	SWI/SNF-related matrix-associated actin-dependent regulator of chromatin	protein coding gene	cytoplasm;nucleus	protein binding	regulation of gene expression;regulation of transcription by RNA polymerase II	PF02201
PF3D7_0611500	PF3D7_0611500.1	N/A	Plasmodium falciparum 3D7	Pf3D7_06_v3:482,825..483,907(-)	conserved protein, unknown function	protein coding gene	apical part of cell	N/A	N/A	N/A
PF3D7_0611600	PF3D7_0611600.1	BTP1	Plasmodium falciparum 3D7	Pf3D7_06_v3:484,649..487,474(-)	basal complex transmembrane protein 1	protein coding gene	basal part of cell;inner membrane pellicle complex	N/A	N/A	N/A
PF3D7_0611700	PF3D7_0611700.1	RPL39	Plasmodium falciparum 3D7	Pf3D7_06_v3:488,418..489,504(-)	60S ribosomal protein L39	protein coding gene	cytosolic large ribosomal subunit	N/A	N/A	PF00832
PF3D7_0611800	PF3D7_0611800.1	N/A	Plasmodium falciparum 3D7	Pf3D7_06_v3:490,750..501,967(-)	conserved Plasmodium protein, unknown function	protein coding gene	nucleus	N/A	N/A	N/A
PF3D7_0611900	PF3D7_0611900.1	N/A	Plasmodium falciparum 3D7	Pf3D7_06_v3:505,314..507,593(+)	lsm12, putative	protein coding gene	N/A	N/A	N/A	PF09793
PF3D7_0612000	PF3D7_0612000.1	N/A	Plasmodium falciparum 3D7	Pf3D7_06_v3:506,386..508,412(-)	conserved Plasmodium protein, unknown function	protein coding gene	N/A	N/A	N/A	N/A
PF3D7_0612100	PF3D7_0612100.1	EIF3L	Plasmodium falciparum 3D7	Pf3D7_06_v3:508,686..511,919(-)	eukaryotic translation initiation factor 3 subunit L, putative	protein coding gene	eukaryotic translation initiation factor 3 complex	N/A	translational initiation	PF10255
PF3D7_0612200	PF3D7_0612200.1	LRR6	Plasmodium falciparum 3D7	Pf3D7_06_v3:512,392..519,614(-)	leucine-rich repeat protein	protein coding gene	chromosome, telomeric region;cytoplasm;nucleus	protein kinase binding	N/A	PF12799
PF3D7_0612300	PF3D7_0612300.1	TMEM234	Plasmodium falciparum 3D7	Pf3D7_06_v3:520,410..521,138(+)	transmembrane protein 234, putative	protein coding gene	N/A	N/A	N/A	PF10639
PF3D7_0612400	PF3D7_0612400.1	N/A	Plasmodium falciparum 3D7	Pf3D7_06_v3:521,142..522,177(+)	conserved Plasmodium protein, unknown function	protein coding gene	mitochondrion	N/A	N/A	PF01195
PF3D7_0612500	PF3D7_0612500.1	N/A	Plasmodium falciparum 3D7	Pf3D7_06_v3:522,300..522,665(-)	conserved Plasmodium protein, unknown function	protein coding gene	N/A	N/A	N/A	N/A
PF3D7_0612600	PF3D7_0612600.1	NCS6	Plasmodium falciparum 3D7	Pf3D7_06_v3:522,936..525,730(-)	cytoplasmic tRNA 2-thiolation protein 1, putative	protein coding gene	cytosolic tRNA wobble base thiouridylase complex	tRNA binding	protein urmylation;tRNA wobble position uridine thiolation	PF01171;PF16503
PF3D7_0612700	PF3D7_0612700.1	P12	Plasmodium falciparum 3D7	Pf3D7_06_v3:525,736..527,850(-)	6-cysteine protein P12	protein coding gene	anchored component of plasma membrane;apical part of cell;cell surface;rhoptry;symbiont-containing vacuolar space	protein binding	entry into host	PF07422
PF3D7_0612800	PF3D7_0612800.1	P12p	Plasmodium falciparum 3D7	Pf3D7_06_v3:527,873..529,438(-)	6-cysteine protein P12p	protein coding gene	anchored component of plasma membrane;cell surface	N/A	N/A	PF07422
PF3D7_0612900	PF3D7_0612900.1	NOG1	Plasmodium falciparum 3D7	Pf3D7_06_v3:530,674..533,646(+)	nucleolar GTP-binding protein 1, putative	protein coding gene	nucleolus;preribosome, large subunit precursor	GTP binding	ribosomal large subunit biogenesis	PF06858;PF08155;PF17835
PF3D7_0613000	PF3D7_0613000.1	N/A	Plasmodium falciparum 3D7	Pf3D7_06_v3:533,673..535,898(-)	conserved Plasmodium protein, unknown function	protein coding gene	N/A	N/A	N/A	N/A
PF3D7_0613000	PF3D7_0613000.2	N/A	Plasmodium falciparum 3D7	Pf3D7_06_v3:533,673..535,898(-)	conserved Plasmodium protein, unknown function	protein coding gene	N/A	N/A	N/A	N/A
PF3D7_0613000	PF3D7_0613000.3	N/A	Plasmodium falciparum 3D7	Pf3D7_06_v3:533,673..535,898(-)	conserved Plasmodium protein, unknown function	protein coding gene	N/A	N/A	N/A	N/A
PF3D7_0613100	PF3D7_0613100.1	N/A	Plasmodium falciparum 3D7	Pf3D7_06_v3:537,127..539,045(+)	conserved Plasmodium protein, unknown function	protein coding gene	N/A	N/A	N/A	N/A
PF3D7_0613200	PF3D7_0613200.1	N/A	Plasmodium falciparum 3D7	Pf3D7_06_v3:539,074..539,954(+)	conserved Plasmodium protein, unknown function	protein coding gene	apicoplast	N/A	N/A	N/A
PF3D7_0613300	PF3D7_0613300.1	ROP14	Plasmodium falciparum 3D7	Pf3D7_06_v3:539,725..545,452(-)	rhoptry protein ROP14	protein coding gene	endoplasmic reticulum membrane;rhoptry	N/A	protein maturation	PF06762
PF3D7_0613400	PF3D7_0613400.1	RPL18	Plasmodium falciparum 3D7	Pf3D7_06_v3:546,920..548,162(+)	50S ribosomal protein L18, apicoplast, putative	protein coding gene	apicoplast;ribosome	5S rRNA binding;structural constituent of ribosome	ribosome biogenesis	PF00861
PF3D7_0613500	PF3D7_0613500.1	N/A	Plasmodium falciparum 3D7	Pf3D7_06_v3:547,900..552,544(-)	AP-3 complex subunit beta, putative	protein coding gene	AP-3 adaptor complex;coated vesicle	N/A	vesicle-mediated transport	PF01602
PF3D7_0613600	PF3D7_0613600.1	N/A	Plasmodium falciparum 3D7	Pf3D7_06_v3:554,117..559,142(+)	conserved Plasmodium protein, unknown function	protein coding gene	N/A	N/A	N/A	N/A
PF3D7_0613700	PF3D7_0613700.1	N/A	Plasmodium falciparum 3D7	Pf3D7_06_v3:558,835..562,741(-)	syntaxin-binding protein, putative	protein coding gene	nucleus;plasma membrane;secretory granule	syntaxin binding	intracellular protein transport;protein secretion;vesicle docking involved in exocytosis;vesicle-mediated transport	PF00995
PF3D7_0613800	PF3D7_0613800.1	ApiAP2	Plasmodium falciparum 3D7	Pf3D7_06_v3:565,925..579,231(+)	AP2 domain transcription factor, putative	protein coding gene	nucleus	sequence-specific DNA binding	response to xenobiotic stimulus	PF00847
PF3D7_0613900	PF3D7_0613900.1	MyoE	Plasmodium falciparum 3D7	Pf3D7_06_v3:579,250..586,589(-)	myosin E, putative	protein coding gene	actin cytoskeleton;basal part of cell;cytoplasm;cytosol;myosin complex;nucleus;vesicle	ATP binding;actin binding;actin filament binding;actin-dependent ATPase activity;microfilament motor activity	actin filament organization;cell motility;vesicle transport along actin filament	PF00063
PF3D7_0614000	PF3D7_0614000.1	N/A	Plasmodium falciparum 3D7	Pf3D7_06_v3:586,596..589,075(-)	thiamine-phosphate synthase, putative	protein coding gene	cytoplasm	thiamine-phosphate diphosphorylase activity	thiamine biosynthetic process	PF02581
PF3D7_0614100	PF3D7_0614100.1	N/A	Plasmodium falciparum 3D7	Pf3D7_06_v3:589,090..592,978(-)	filamin domain-containing protein, putative	protein coding gene	N/A	N/A	N/A	PF00630
PF3D7_0614200	PF3D7_0614200.1	NAR1	Plasmodium falciparum 3D7	Pf3D7_06_v3:593,122..595,984(-)	cytosolic Fe-S cluster assembly factor NAR1, putative	protein coding gene	N/A	4 iron, 4 sulfur cluster binding;iron-sulfur cluster binding	iron-sulfur cluster assembly	PF02906
PF3D7_0614300	PF3D7_0614300.1	MFR1	Plasmodium falciparum 3D7	Pf3D7_06_v3:596,483..602,866(-)	major facilitator superfamily-related transporter, putative	protein coding gene	integral component of membrane	N/A	N/A	PF07690
PF3D7_0614400	PF3D7_0614400.1	CWF7	Plasmodium falciparum 3D7	Pf3D7_06_v3:602,024..605,863(+)	pre-mRNA-splicing factor CWF7, putative	protein coding gene	Prp19 complex;catalytic step 2 spliceosome	N/A	mRNA processing	PF05700
PF3D7_0614500	PF3D7_0614500.1	RPL19	Plasmodium falciparum 3D7	Pf3D7_06_v3:605,437..608,581(-)	60S ribosomal protein L19	protein coding gene	cytosolic large ribosomal subunit;nucleus	RNA binding;structural constituent of ribosome	translation	PF01280
PF3D7_0614600	PF3D7_0614600.1	N/A	Plasmodium falciparum 3D7	Pf3D7_06_v3:609,088..611,451(-)	conserved Plasmodium protein, unknown function	protein coding gene	N/A	N/A	N/A	N/A
PF3D7_0614700	PF3D7_0614700.1	N/A	Plasmodium falciparum 3D7	Pf3D7_06_v3:612,082..614,491(+)	F-box protein FBXO6, putative	protein coding gene	N/A	N/A	N/A	PF00646
PF3D7_0614800	PF3D7_0614800.1	NTHL1	Plasmodium falciparum 3D7	Pf3D7_06_v3:615,060..617,043(-)	endonuclease III-like protein 1, putative	protein coding gene	nucleus	DNA-(apurinic or apyrimidinic site) endonuclease activity;endonuclease activity;oxidized pyrimidine nucleobase lesion DNA N-glycosylase activity	DNA repair;base-excision repair, AP site formation;nucleotide-excision repair, DNA incision, 5'-to lesion	PF00633;PF00730
PF3D7_0614900	PF3D7_0614900.1	N/A	Plasmodium falciparum 3D7	Pf3D7_06_v3:617,589..622,087(+)	conserved Plasmodium membrane protein, unknown function	protein coding gene	integral component of membrane	N/A	N/A	N/A
PF3D7_0615000	PF3D7_0615000.1	N/A	Plasmodium falciparum 3D7	Pf3D7_06_v3:622,098..623,014(+)	conserved Plasmodium protein, unknown function	protein coding gene	N/A	N/A	N/A	N/A
PF3D7_0615100	PF3D7_0615100.1	ENR	Plasmodium falciparum 3D7	Pf3D7_06_v3:622,767..624,490(-)	enoyl-acyl carrier reductase	protein coding gene	apicoplast	enoyl-[acyl-carrier-protein] reductase activity	fatty acid biosynthetic process;response to xenobiotic stimulus	PF13561
PF3D7_0615200	PF3D7_0615200.1	N/A	Plasmodium falciparum 3D7	Pf3D7_06_v3:625,120..627,612(+)	conserved protein, unknown function	protein coding gene	apical part of cell	N/A	N/A	N/A
PF3D7_0615300	PF3D7_0615300.1	GWT1	Plasmodium falciparum 3D7	Pf3D7_06_v3:627,693..630,345(-)	GPI-anchored wall transfer protein 1, putative	protein coding gene	integral component of membrane	glucosaminyl-phosphatidylinositol O-acyltransferase activity	GPI anchor biosynthetic process;protein localization to plasma membrane	PF06423
PF3D7_0615400	PF3D7_0615400.1	N/A	Plasmodium falciparum 3D7	Pf3D7_06_v3:630,396..642,340(-)	ribonuclease, putative	protein coding gene	P-body;exosome (RNase complex);nucleus	3'-5'-exoribonuclease activity;ribonuclease activity	RNA processing;mRNA catabolic process	PF00773;PF17849
PF3D7_0615500	PF3D7_0615500.1	CRK5	Plasmodium falciparum 3D7	Pf3D7_06_v3:642,699..646,241(+)	cdc2-related protein kinase 5	protein coding gene	extracellular vesicle;mediator complex;nucleus	RNA polymerase II CTD heptapeptide repeat kinase activity;cyclin-dependent protein serine/threonine kinase activity	protein phosphorylation;regulation of cell cycle	PF00069
PF3D7_0615600	PF3D7_0615600.1	N/A	Plasmodium falciparum 3D7	Pf3D7_06_v3:646,286..655,848(-)	zinc finger protein, putative	protein coding gene	preribosome, large subunit precursor	rRNA binding	ribosomal large subunit assembly	N/A
PF3D7_0615700	PF3D7_0615700.1	ALYREF	Plasmodium falciparum 3D7	Pf3D7_06_v3:656,020..657,929(+)	THO complex subunit 4, putative	protein coding gene	N/A	RNA binding	mRNA export from nucleus	PF00076
PF3D7_0615800	PF3D7_0615800.1	COG4	Plasmodium falciparum 3D7	Pf3D7_06_v3:657,706..662,270(-)	conserved oligomeric Golgi complex subunit 4, putative	protein coding gene	N/A	N/A	N/A	N/A
PF3D7_0615900	PF3D7_0615900.1	N/A	Plasmodium falciparum 3D7	Pf3D7_06_v3:662,372..669,026(-)	protein phosphatase, putative	protein coding gene	N/A	N/A	N/A	N/A
PF3D7_0616000	PF3D7_0616000.1	PDXK	Plasmodium falciparum 3D7	Pf3D7_06_v3:669,060..671,828(+)	pyridoxal kinase	protein coding gene	cytosol	ATP binding;pyridoxal binding;pyridoxal kinase activity;pyridoxamine binding;pyridoxine binding	phosphorylation;pyridoxal 5'-phosphate salvage;pyridoxine metabolic process;response to singlet oxygen;vitamin B6 biosynthetic process	PF08543
PF3D7_0616100	PF3D7_0616100.1	N/A	Plasmodium falciparum 3D7	Pf3D7_06_v3:671,851..672,965(+)	conserved Plasmodium protein, unknown function	protein coding gene	N/A	N/A	N/A	N/A
PF3D7_0616200	PF3D7_0616200.1	NDC80	Plasmodium falciparum 3D7	Pf3D7_06_v3:674,071..676,647(+)	kinetochore protein NDC80, putative	protein coding gene	Ndc80 complex;chromosome, centromeric region;condensed nuclear chromosome kinetochore;nucleus	microtubule binding	attachment of mitotic spindle microtubules to kinetochore;chromosome segregation	PF03801
PF3D7_0616300	PF3D7_0616300.1	N/A	Plasmodium falciparum 3D7	Pf3D7_06_v3:676,559..677,881(-)	conserved Plasmodium protein, unknown function	protein coding gene	N/A	N/A	N/A	N/A
PF3D7_0616400	PF3D7_0616400.1	N/A	Plasmodium falciparum 3D7	Pf3D7_06_v3:678,087..684,110(+)	conserved Plasmodium protein, unknown function	protein coding gene	apicoplast	N/A	N/A	N/A
PF3D7_0616500	PF3D7_0616500.1	TLP	Plasmodium falciparum 3D7	Pf3D7_06_v3:684,742..688,857(+)	TRAP-like protein	protein coding gene	N/A	N/A	cell motility;entry into host	PF00090
PF3D7_0616600	PF3D7_0616600.1	N/A	Plasmodium falciparum 3D7	Pf3D7_06_v3:689,086..691,142(-)	conserved protein, unknown function	protein coding gene	N/A	N/A	N/A	PF15072
PF3D7_0616700	PF3D7_0616700.1	N/A	Plasmodium falciparum 3D7	Pf3D7_06_v3:691,710..694,810(-)	ras GTPAse, putative	protein coding gene	endosome	N/A	regulation of endocytosis	PF00071
PF3D7_0616800	PF3D7_0616800.1	MQO	Plasmodium falciparum 3D7	Pf3D7_06_v3:695,090..698,245(+)	malate:quinone oxidoreductase	protein coding gene	cytoplasm;membrane;mitochondrion	L-malate dehydrogenase activity;malate dehydrogenase (quinone) activity;oxidoreductase activity	pyruvate metabolic process;response to xenobiotic stimulus	PF06039
PF3D7_0616900	PF3D7_0616900.1	N/A	Plasmodium falciparum 3D7	Pf3D7_06_v3:698,792..704,220(+)	conserved Plasmodium protein, unknown function	protein coding gene	N/A	N/A	N/A	N/A
PF3D7_0617000	PF3D7_0617000.1	TOM40	Plasmodium falciparum 3D7	Pf3D7_06_v3:703,477..705,444(-)	mitochondrial import receptor subunit TOM40, putative	protein coding gene	mitochondrial outer membrane translocase complex;mitochondrion	protein transmembrane transporter activity	protein import into mitochondrial matrix	PF01459
PF3D7_0617100	PF3D7_0617100.1	N/A	Plasmodium falciparum 3D7	Pf3D7_06_v3:707,666..714,669(+)	AP-2 complex subunit alpha, putative	protein coding gene	AP-2 adaptor complex;clathrin coat of trans-Golgi network vesicle	cargo adaptor activity;clathrin adaptor activity;protein binding	clathrin-dependent endocytosis;protein-containing complex assembly;receptor-mediated endocytosis;vesicle-mediated transport	PF01602
PF3D7_0617200	PF3D7_0617200.1	N/A	Plasmodium falciparum 3D7	Pf3D7_06_v3:714,972..720,182(+)	BFR1 domain-containing protein, putative	protein coding gene	endoplasmic reticulum;nuclear outer membrane-endoplasmic reticulum membrane network;nucleus;ribonucleoprotein complex	N/A	intracellular mRNA localization	N/A
PF3D7_0617300	PF3D7_0617300.1	N/A	Plasmodium falciparum 3D7	Pf3D7_06_v3:720,336..721,721(+)	RNA-binding protein, putative	protein coding gene	N/A	N/A	N/A	N/A
PF3D7_0617400	PF3D7_0617400.1	VAR	Plasmodium falciparum 3D7	Pf3D7_06_v3:722,377..731,499(-)	erythrocyte membrane protein 1, PfEMP1	protein coding gene	host cell plasma membrane;infected host cell surface knob	cell adhesion molecule binding;host cell surface binding	antigenic variation;cell-cell adhesion;cytoadherence to microvasculature, mediated by symbiont protein;modulation by symbiont of host erythrocyte aggregation	PF03011;PF05424;PF15445;PF15447;PF18562
PF3D7_0617600	PF3D7_0617600.1	N/A	Plasmodium falciparum 3D7	Pf3D7_06_v3:738,020..739,535(-)	stevor	protein coding gene	Maurer's cleft;host cell membrane	N/A	modulation by symbiont of host erythrocyte aggregation	PF17410
PF3D7_0617700	PF3D7_0617700.1	RIF	Plasmodium falciparum 3D7	Pf3D7_06_v3:741,269..742,406(-)	rifin	protein coding gene	Maurer's cleft;host cell plasma membrane;symbiont-containing vacuole	N/A	antigenic variation;cytoadherence to microvasculature, mediated by symbiont protein;modulation by symbiont of host erythrocyte aggregation	PF02009
PF3D7_0617800	PF3D7_0617800.1	H2A	Plasmodium falciparum 3D7	Pf3D7_06_v3:747,329..749,285(-)	histone H2A	protein coding gene	nucleosome;nucleus	DNA binding	chromatin organization;chromatin silencing;chromosome organization	PF00125;PF16211
PF3D7_0617900	PF3D7_0617900.1	H3.3	Plasmodium falciparum 3D7	Pf3D7_06_v3:753,392..756,429(+)	histone H3 variant	protein coding gene	euchromatin;nucleosome;nucleus	DNA binding;RNA binding;protein binding	chromosome organization	PF00125
PF3D7_0618000	PF3D7_0618000.1	N/A	Plasmodium falciparum 3D7	Pf3D7_06_v3:757,278..761,654(+)	conserved Plasmodium membrane protein, unknown function	protein coding gene	food vacuole	N/A	N/A	N/A
PF3D7_0618100	PF3D7_0618100.1	N/A	Plasmodium falciparum 3D7	Pf3D7_06_v3:761,703..764,548(+)	conserved Plasmodium protein, unknown function	protein coding gene	N/A	N/A	N/A	N/A
PF3D7_0618200	PF3D7_0618200.1	N/A	Plasmodium falciparum 3D7	Pf3D7_06_v3:764,260..765,980(-)	conserved protein, unknown function	protein coding gene	nucleus	N/A	N/A	N/A
PF3D7_0618300	PF3D7_0618300.1	N/A	Plasmodium falciparum 3D7	Pf3D7_06_v3:767,672..769,944(+)	60S ribosomal protein L27a, putative	protein coding gene	cytosolic large ribosomal subunit;large ribosomal subunit;nucleus	structural constituent of ribosome	translation	PF00828
PF3D7_0618400	PF3D7_0618400.1	N/A	Plasmodium falciparum 3D7	Pf3D7_06_v3:770,147..772,506(-)	LMBR1 domain-containing protein, putative	protein coding gene	integral component of membrane	N/A	N/A	PF04791
PF3D7_0618500	PF3D7_0618500.1	MDH	Plasmodium falciparum 3D7	Pf3D7_06_v3:774,491..776,051(+)	malate dehydrogenase	protein coding gene	cytoplasm;cytosol	L-malate dehydrogenase activity	N/A	PF00056;PF02866
PF3D7_0618600	PF3D7_0618600.1	ROM10	Plasmodium falciparum 3D7	Pf3D7_06_v3:775,980..777,835(-)	rhomboid protease ROM10	protein coding gene	mitochondrion	peptidase activity	signal peptide processing	PF01694
PF3D7_0618700	PF3D7_0618700.1	N/A	Plasmodium falciparum 3D7	Pf3D7_06_v3:778,651..779,988(+)	trafficking protein particle complex subunit 6A, putative	protein coding gene	Maurer's cleft;TRAPP complex;cis-Golgi network;nucleus;trans-Golgi network	N/A	endoplasmic reticulum to Golgi vesicle-mediated transport	PF04051
PF3D7_0618800	PF3D7_0618800.1	N/A	Plasmodium falciparum 3D7	Pf3D7_06_v3:779,480..783,561(-)	heptatricopeptide repeat-containing protein, putative	protein coding gene	N/A	N/A	N/A	N/A
PF3D7_0618900	PF3D7_0618900.1	GPI1	Plasmodium falciparum 3D7	Pf3D7_06_v3:784,019..788,588(+)	phosphatidylinositol N-acetylglucosaminyltransferase subunit GPI1	protein coding gene	glycosylphosphatidylinositol-N-acetylglucosaminyltransferase (GPI-GnT) complex	phosphatidylinositol N-acetylglucosaminyltransferase activity	GPI anchor biosynthetic process	PF05024
PF3D7_0618900	PF3D7_0618900.2	GPI1	Plasmodium falciparum 3D7	Pf3D7_06_v3:784,019..788,588(+)	phosphatidylinositol N-acetylglucosaminyltransferase subunit GPI1	protein coding gene	glycosylphosphatidylinositol-N-acetylglucosaminyltransferase (GPI-GnT) complex	N/A	N/A	PF05024
PF3D7_0619000	PF3D7_0619000.1	N/A	Plasmodium falciparum 3D7	Pf3D7_06_v3:788,061..796,075(-)	FPL domain-containing protein, putative	protein coding gene	endolysosome membrane;integral component of membrane	N/A	endosomal transport;endosome to lysosome transport;regulation of autophagosome maturation	PF09758
PF3D7_0619000	PF3D7_0619000.2	N/A	Plasmodium falciparum 3D7	Pf3D7_06_v3:788,061..796,075(-)	FPL domain-containing protein, putative	protein coding gene	endolysosome membrane;integral component of membrane	N/A	endosomal transport;endosome to lysosome transport;regulation of autophagosome maturation	PF09758
PF3D7_0619100	PF3D7_0619100.1	N/A	Plasmodium falciparum 3D7	Pf3D7_06_v3:796,519..798,904(+)	conserved Plasmodium protein, unknown function	protein coding gene	apicoplast	N/A	N/A	N/A
PF3D7_0619200	PF3D7_0619200.1	N/A	Plasmodium falciparum 3D7	Pf3D7_06_v3:799,040..803,205(+)	conserved Plasmodium protein, unknown function	protein coding gene	N/A	N/A	N/A	N/A
PF3D7_0619300	PF3D7_0619300.1	N/A	Plasmodium falciparum 3D7	Pf3D7_06_v3:802,988..814,565(-)	conserved Plasmodium protein, unknown function	protein coding gene	N/A	N/A	N/A	N/A
PF3D7_0619400	PF3D7_0619400.1	N/A	Plasmodium falciparum 3D7	Pf3D7_06_v3:815,190..818,801(-)	cell division cycle protein 48 homologue, putative	protein coding gene	VCP-NPL4-UFD1 AAA ATPase complex;cytoplasm;cytosol;endoplasmic reticulum;extracellular vesicle;nucleus	ATP hydrolysis activity;RNA binding;polyubiquitin modification-dependent protein binding	ER-associated misfolded protein catabolic process;autophagosome maturation;macroautophagy;mitotic spindle disassembly;regulation of cell cycle process;retrograde protein transport, ER to cytosol;ubiquitin-dependent ERAD pathway	PF00004;PF02359;PF02933;PF17862
PF3D7_0619500	PF3D7_0619500.1	ACS12	Plasmodium falciparum 3D7	Pf3D7_06_v3:819,576..824,325(-)	acyl-CoA synthetase	protein coding gene	N/A	medium-chain fatty acid-CoA ligase activity	fatty acid metabolic process	PF00501;PF02775;PF02776
PF3D7_0619600	PF3D7_0619600.1	N/A	Plasmodium falciparum 3D7	Pf3D7_06_v3:824,758..828,098(+)	conserved Plasmodium protein, unknown function	protein coding gene	N/A	N/A	N/A	N/A
PF3D7_0619700	PF3D7_0619700.1	N/A	Plasmodium falciparum 3D7	Pf3D7_06_v3:828,122..830,389(-)	F-box protein FBXO1, putative	protein coding gene	inner membrane pellicle complex;perinuclear region of cytoplasm	N/A	cell division	PF00646
PF3D7_0619800	PF3D7_0619800.1	N/A	Plasmodium falciparum 3D7	Pf3D7_06_v3:830,916..839,790(-)	conserved Plasmodium membrane protein, unknown function	protein coding gene	host cell surface	histone binding	N/A	N/A
PF3D7_0619900	PF3D7_0619900.1	SF3A2	Plasmodium falciparum 3D7	Pf3D7_06_v3:839,748..841,672(+)	splicing factor 3A subunit 2, putative	protein coding gene	U2 snRNP;U2-type prespliceosome;catalytic step 2 spliceosome;spliceosomal complex	N/A	RNA splicing;spliceosomal complex assembly	PF12874;PF16835
PF3D7_0620000	PF3D7_0620000.1	PIMMS43	Plasmodium falciparum 3D7	Pf3D7_06_v3:841,846..843,363(-)	PIMMS43 protein	protein coding gene	cell surface	N/A	entry into host;evasion of host immune response	N/A
PF3D7_0620100	PF3D7_0620100.1	ATPTG12	Plasmodium falciparum 3D7	Pf3D7_06_v3:845,162..846,452(+)	ATP synthase-associated protein, putative	protein coding gene	mitochondrion	N/A	N/A	N/A
PF3D7_0620200	PF3D7_0620200.1	N/A	Plasmodium falciparum 3D7	Pf3D7_06_v3:846,523..848,013(-)	conserved Plasmodium protein, unknown function	protein coding gene	N/A	N/A	N/A	N/A
PF3D7_0620300	PF3D7_0620300.1	N/A	Plasmodium falciparum 3D7	Pf3D7_06_v3:848,035..850,864(-)	conserved Plasmodium protein, unknown function	protein coding gene	N/A	N/A	N/A	N/A
PF3D7_0620400	PF3D7_0620400.1	MSP10	Plasmodium falciparum 3D7	Pf3D7_06_v3:851,162..853,200(-)	merozoite surface protein 10	protein coding gene	anchored component of plasma membrane	host cell surface binding	N/A	PF12947
PF3D7_0620500	PF3D7_0620500.1	N/A	Plasmodium falciparum 3D7	Pf3D7_06_v3:853,821..857,324(+)	cleavage stimulation factor subunit 1, putative	protein coding gene	mRNA cleavage stimulating factor complex	RNA binding	RNA processing	PF00400
PF3D7_0620600	PF3D7_0620600.1	N/A	Plasmodium falciparum 3D7	Pf3D7_06_v3:857,342..858,966(+)	conserved Plasmodium protein, unknown function	protein coding gene	N/A	N/A	N/A	N/A
PF3D7_0620700	PF3D7_0620700.1	N/A	Plasmodium falciparum 3D7	Pf3D7_06_v3:858,689..860,721(-)	DnaJ protein, putative	protein coding gene	mitochondrion	N/A	cristae formation	PF11875
PF3D7_0621000	PF3D7_0621000.1	N/A	Plasmodium falciparum 3D7	Pf3D7_06_v3:862,450..865,522(+)	conserved Plasmodium protein, unknown function	protein coding gene	apicoplast	N/A	N/A	N/A
PF3D7_0621100	PF3D7_0621100.1	N/A	Plasmodium falciparum 3D7	Pf3D7_06_v3:865,550..870,507(-)	conserved Plasmodium protein, unknown function	protein coding gene	N/A	N/A	N/A	N/A
PF3D7_0621200	PF3D7_0621200.1	PDX1	Plasmodium falciparum 3D7	Pf3D7_06_v3:871,089..873,059(-)	pyridoxine biosynthesis protein PDX1	protein coding gene	cytosol;extracellular vesicle;nucleus	amine-lyase activity;catalytic activity;glutaminase activity;identical protein binding	cellular amino acid metabolic process;pyridoxal phosphate biosynthetic process;pyridoxine biosynthetic process;response to singlet oxygen;vitamin B6 biosynthetic process	PF01680
PF3D7_0621300	PF3D7_0621300.1	PUF3	Plasmodium falciparum 3D7	Pf3D7_06_v3:873,178..877,670(+)	mRNA-binding protein PUF3	protein coding gene	cytoplasm;nucleolus	RNA binding;mRNA binding	regulation of translation	N/A
PF3D7_0621350	PF3D7_0621350.1	SYS1	Plasmodium falciparum 3D7	Pf3D7_06_v3:876,679..877,298(-)	protein SYS1, putative	protein coding gene	integral component of Golgi membrane;integral component of membrane;trans-Golgi network	N/A	Golgi to endosome transport;Golgi to plasma membrane protein transport;protein localization to Golgi apparatus	PF09801
PF3D7_0621400	PF3D7_0621400.1	ALV7	Plasmodium falciparum 3D7	Pf3D7_06_v3:878,363..880,852(+)	Pf77 protein	protein coding gene	inner membrane pellicle complex	N/A	N/A	PF12314
PF3D7_0621500	PF3D7_0621500.1	RPP1	Plasmodium falciparum 3D7	Pf3D7_06_v3:881,823..883,145(+)	ribonuclease P/MRP protein subunit RPP1, putative	protein coding gene	nucleolar ribonuclease P complex;ribonuclease MRP complex;ribonuclease P complex	RNA binding;ribonuclease activity	RNA phosphodiester bond hydrolysis, endonucleolytic;tRNA processing	PF01876
PF3D7_0621700	PF3D7_0621700.1	N/A	Plasmodium falciparum 3D7	Pf3D7_06_v3:884,024..890,267(+)	RAP protein, putative	protein coding gene	N/A	N/A	N/A	N/A
PF3D7_0621800	PF3D7_0621800.1	N/A	Plasmodium falciparum 3D7	Pf3D7_06_v3:890,901..892,882(+)	nascent polypeptide-associated complex subunit alpha, putative	protein coding gene	cytoplasm;nascent polypeptide-associated complex;nucleus	unfolded protein binding	'de novo' cotranslational protein folding;protein targeting to membrane	PF01849;PF19026
PF3D7_0621900	PF3D7_0621900.1	SRP68	Plasmodium falciparum 3D7	Pf3D7_06_v3:892,883..896,208(-)	signal recognition particle subunit SRP68, putative	protein coding gene	nucleus;signal recognition particle, endoplasmic reticulum targeting	RNA binding;signal recognition particle binding	N/A	N/A
PF3D7_0622000	PF3D7_0622000.1	N/A	Plasmodium falciparum 3D7	Pf3D7_06_v3:896,664..897,983(+)	conserved Plasmodium protein, unknown function	protein coding gene	N/A	N/A	N/A	N/A
PF3D7_0622100	PF3D7_0622100.1	N/A	Plasmodium falciparum 3D7	Pf3D7_06_v3:897,970..902,735(-)	conserved Plasmodium protein, unknown function	protein coding gene	N/A	N/A	N/A	N/A
PF3D7_0622200	PF3D7_0622200.1	MIAB	Plasmodium falciparum 3D7	Pf3D7_06_v3:903,432..906,428(-)	tRNA-2-methylthio-N(6)-dimethylallyladenosine synthase	protein coding gene	apicoplast;endoplasmic reticulum	N6-threonylcarbomyladenosine methylthiotransferase activity;methylthiotransferase activity	tRNA methylthiolation	PF00919;PF04055
PF3D7_0622300	PF3D7_0622300.1	N/A	Plasmodium falciparum 3D7	Pf3D7_06_v3:907,610..911,239(+)	vacuolar transporter chaperone, putative	protein coding gene	N/A	N/A	N/A	PF09359
PF3D7_0622400	PF3D7_0622400.1	N/A	Plasmodium falciparum 3D7	Pf3D7_06_v3:911,283..912,177(+)	conserved protein, unknown function	protein coding gene	mitochondrion	N/A	N/A	N/A
PF3D7_0622500	PF3D7_0622500.1	N/A	Plasmodium falciparum 3D7	Pf3D7_06_v3:912,197..914,142(-)	RNA methyltransferase, putative	protein coding gene	N/A	RNA methyltransferase activity;rRNA (uridine-N3-)-methyltransferase activity	rRNA base methylation	PF04452
PF3D7_0622600	PF3D7_0622600.1	QCR9	Plasmodium falciparum 3D7	Pf3D7_06_v3:914,409..915,450(+)	cytochrome b-c1 complex subunit 9, putative	protein coding gene	mitochondrial respiratory chain complex III;mitochondrion	N/A	N/A	PF05365
PF3D7_0622700	PF3D7_0622700.1	N/A	Plasmodium falciparum 3D7	Pf3D7_06_v3:915,905..917,975(-)	conserved Plasmodium membrane protein, unknown function	protein coding gene	apicoplast	N/A	N/A	N/A
PF3D7_0622800	PF3D7_0622800.1	N/A	Plasmodium falciparum 3D7	Pf3D7_06_v3:918,684..924,649(+)	leucine--tRNA ligase, putative	protein coding gene	cytoplasm;nucleus	leucine-tRNA ligase activity	leucyl-tRNA aminoacylation	PF00133;PF08264
PF3D7_0622900	PF3D7_0622900.1	AP2Tel	Plasmodium falciparum 3D7	Pf3D7_06_v3:924,060..932,959(-)	AP2 domain transcription factor AP2Tel	protein coding gene	chromosome, telomeric region;nuclear periphery	DNA binding;telomeric DNA binding	regulation of transcription, DNA-templated	N/A
PF3D7_0623000	PF3D7_0623000.1	CS	Plasmodium falciparum 3D7	Pf3D7_06_v3:936,298..938,735(-)	chorismate synthase	protein coding gene	cytosol	FMN binding;NADPH dehydrogenase activity;chorismate synthase activity	aromatic amino acid family biosynthetic process;chorismate biosynthetic process	PF01264
PF3D7_0623100	PF3D7_0623100.1	NAB2	Plasmodium falciparum 3D7	Pf3D7_06_v3:938,917..944,710(-)	nuclear polyadenylated RNA-binding protein NAB2, putative	protein coding gene	cytoplasm;nuclear periphery;nucleus	RNA binding;poly(A) binding	negative regulation of mRNA polyadenylation;regulation of mRNA stability	PF14608
PF3D7_0623200	PF3D7_0623200.1	FNR	Plasmodium falciparum 3D7	Pf3D7_06_v3:945,100..947,629(+)	ferredoxin--NADP reductase	protein coding gene	apicoplast	FAD binding;electron transfer activity;ferredoxin-NAD(P) reductase activity;ferredoxin-NADP+ reductase activity;identical protein binding;protein binding	oxidation-reduction process;response to xenobiotic stimulus	PF00175
PF3D7_0623300	PF3D7_0623300.1	N/A	Plasmodium falciparum 3D7	Pf3D7_06_v3:947,121..949,262(-)	EGF-like membrane protein, putative	protein coding gene	N/A	N/A	N/A	N/A
PF3D7_0623400	PF3D7_0623400.1	Mei2	Plasmodium falciparum 3D7	Pf3D7_06_v3:950,223..951,506(-)	MEI2-like RNA-binding protein	protein coding gene	cytoplasm;ribonucleoprotein complex	RNA binding	positive regulation of meiotic nuclear division;schizogony	PF04059
PF3D7_0623500	PF3D7_0623500.1	SOD2	Plasmodium falciparum 3D7	Pf3D7_06_v3:952,825..955,039(-)	superoxide dismutase [Fe]	protein coding gene	apicoplast;mitochondrion	superoxide dismutase activity	removal of superoxide radicals;response to oxidative stress	PF00081;PF02777
PF3D7_0623600	PF3D7_0623600.1	N/A	Plasmodium falciparum 3D7	Pf3D7_06_v3:955,547..958,868(+)	splicing factor-like protein 1, putative	protein coding gene	nucleus	RNA binding;mRNA binding	RNA splicing;RNA splicing, via transesterification reactions;mRNA splicing, via spliceosome;regulation of alternative mRNA splicing, via spliceosome	PF00013;PF16275
PF3D7_0623700	PF3D7_0623700.1	SUV3	Plasmodium falciparum 3D7	Pf3D7_06_v3:958,885..962,607(-)	ATP-dependent RNA helicase SUV3, putative	protein coding gene	mitochondrial degradosome	RNA helicase activity	RNA catabolic process;RNA metabolic process;mitochondrial RNA 3'-end processing	PF00271;PF12513
PF3D7_0623800	PF3D7_0623800.1	TKL4	Plasmodium falciparum 3D7	Pf3D7_06_v3:962,886..974,547(-)	tyrosine kinase-like protein, putative	protein coding gene	N/A	protein kinase activity;protein serine/threonine kinase activity	protein phosphorylation	PF00069
PF3D7_0623900	PF3D7_0623900.1	N/A	Plasmodium falciparum 3D7	Pf3D7_06_v3:977,162..978,525(+)	ribonuclease H2 subunit A, putative	protein coding gene	nucleus;ribonuclease H2 complex	RNA-DNA hybrid ribonuclease activity	DNA replication, removal of RNA primer;RNA catabolic process;RNA phosphodiester bond hydrolysis, endonucleolytic;mismatch repair	PF01351
PF3D7_0624000	PF3D7_0624000.1	HK	Plasmodium falciparum 3D7	Pf3D7_06_v3:980,208..983,258(+)	hexokinase	protein coding gene	Maurer's cleft;RNA N6-methyladenosine methyltransferase complex;cytosol;mitochondrion;nucleus	fructokinase activity;glucokinase activity;hexokinase activity;mannokinase activity	cellular glucose homeostasis;glucose 6-phosphate metabolic process;glycolytic process;response to xenobiotic stimulus	PF00349;PF03727
PF3D7_0624100	PF3D7_0624100.1	N/A	Plasmodium falciparum 3D7	Pf3D7_06_v3:983,297..985,562(+)	conserved protein, unknown function	protein coding gene	mitochondrion	N/A	N/A	N/A
PF3D7_0624200	PF3D7_0624200.1	N/A	Plasmodium falciparum 3D7	Pf3D7_06_v3:984,837..986,998(-)	SURP domain-containing protein, putative	protein coding gene	N/A	N/A	mRNA 5'-splice site recognition	N/A
PF3D7_0624300	PF3D7_0624300.1	N/A	Plasmodium falciparum 3D7	Pf3D7_06_v3:987,808..989,636(+)	CPW-WPC family protein	protein coding gene	N/A	N/A	N/A	PF09717
PF3D7_0624400	PF3D7_0624400.1	N/A	Plasmodium falciparum 3D7	Pf3D7_06_v3:989,930..992,253(-)	conserved protein, unknown function	protein coding gene	apicoplast	N/A	N/A	N/A
PF3D7_0624500	PF3D7_0624500.1	APC11	Plasmodium falciparum 3D7	Pf3D7_06_v3:993,658..996,430(+)	anaphase-promoting complex subunit 11, putative	protein coding gene	anaphase-promoting complex;cullin-RING ubiquitin ligase complex;nucleus	cullin family protein binding;ubiquitin protein ligase activity	positive regulation of mitotic metaphase/anaphase transition;protein ubiquitination;ubiquitin-dependent protein catabolic process	PF12861
PF3D7_0624600	PF3D7_0624600.1	ISWI	Plasmodium falciparum 3D7	Pf3D7_06_v3:998,548..1,009,457(+)	ISWI chromatin-remodeling complex ATPase	protein coding gene	nucleus	ATP-dependent activity, acting on DNA;DNA binding;RNA binding;helicase activity;transcription cis-regulatory region binding	chromatin remodeling;positive regulation of transcription, DNA-templated	PF00176;PF00271;PF00628
PF3D7_0624700	PF3D7_0624700.1	PIGL	Plasmodium falciparum 3D7	Pf3D7_06_v3:1,008,978..1,010,796(-)	N-acetylglucosaminyl-phosphatidylinositol de-N-acetylase, putative	protein coding gene	endoplasmic reticulum	N-acetylglucosaminylphosphatidylinositol deacetylase activity;hydrolase activity, acting on carbon-nitrogen (but not peptide) bonds, in linear amides	GPI anchor biosynthetic process	PF02585
PF3D7_0624800	PF3D7_0624800.1	N/A	Plasmodium falciparum 3D7	Pf3D7_06_v3:1,011,429..1,014,569(-)	conserved Plasmodium protein, unknown function	protein coding gene	N/A	N/A	N/A	N/A
PF3D7_0624900	PF3D7_0624900.1	N/A	Plasmodium falciparum 3D7	Pf3D7_06_v3:1,015,681..1,018,905(+)	GAS8-like protein, putative	protein coding gene	Golgi apparatus;microtubule	N/A	cellular protein localization	PF13851
PF3D7_0625000	PF3D7_0625000.1	SMS1	Plasmodium falciparum 3D7	Pf3D7_06_v3:1,019,648..1,022,452(+)	sphingomyelin synthase 1, putative	protein coding gene	integral component of Golgi membrane;integral component of endoplasmic reticulum membrane;integral component of plasma membrane	ceramide cholinephosphotransferase activity;sphingomyelin synthase activity	ceramide biosynthetic process	PF14360
PF3D7_0625000	PF3D7_0625000.2	SMS1	Plasmodium falciparum 3D7	Pf3D7_06_v3:1,019,648..1,022,452(+)	sphingomyelin synthase 1, putative	protein coding gene	integral component of Golgi membrane;integral component of endoplasmic reticulum membrane;integral component of plasma membrane	ceramide cholinephosphotransferase activity;sphingomyelin synthase activity	ceramide biosynthetic process	PF14360
PF3D7_0625100	PF3D7_0625100.1	SMS2	Plasmodium falciparum 3D7	Pf3D7_06_v3:1,023,015..1,024,214(+)	sphingomyelin synthase 2, putative	protein coding gene	integral component of Golgi membrane;integral component of endoplasmic reticulum membrane;integral component of plasma membrane	ceramide cholinephosphotransferase activity;sphingomyelin synthase activity	ceramide biosynthetic process	PF14360
PF3D7_0625200	PF3D7_0625200.1	N/A	Plasmodium falciparum 3D7	Pf3D7_06_v3:1,024,810..1,026,740(+)	conserved Plasmodium protein, unknown function	protein coding gene	N/A	N/A	N/A	N/A
PF3D7_0625300	PF3D7_0625300.1	MtDNAP	Plasmodium falciparum 3D7	Pf3D7_06_v3:1,026,468..1,031,411(-)	mitochondrial DNA polymerase	protein coding gene	cytoplasm;mitochondrion	5'-3' exonuclease activity;DNA binding;DNA-directed DNA polymerase activity	DNA replication;DNA-dependent DNA replication	PF00476
PF3D7_0625400	PF3D7_0625400.1	N/A	Plasmodium falciparum 3D7	Pf3D7_06_v3:1,031,969..1,034,471(-)	conserved Plasmodium protein, unknown function	protein coding gene	N/A	N/A	N/A	N/A
PF3D7_0625500	PF3D7_0625500.1	N/A	Plasmodium falciparum 3D7	Pf3D7_06_v3:1,034,313..1,037,552(+)	conserved Plasmodium membrane protein, unknown function	protein coding gene	N/A	N/A	N/A	N/A
PF3D7_0625600	PF3D7_0625600.1	PAP	Plasmodium falciparum 3D7	Pf3D7_06_v3:1,037,558..1,042,004(+)	poly(A) polymerase PAP, putative	protein coding gene	nucleus	polynucleotide adenylyltransferase activity	RNA polyadenylation;mRNA polyadenylation	PF01909;PF04926;PF04928
PF3D7_0625700	PF3D7_0625700.1	N/A	Plasmodium falciparum 3D7	Pf3D7_06_v3:1,042,132..1,043,395(-)	conserved protein, unknown function	protein coding gene	mitochondrion	N/A	N/A	N/A
PF3D7_0625800	PF3D7_0625800.1	N/A	Plasmodium falciparum 3D7	Pf3D7_06_v3:1,043,400..1,045,953(+)	conserved Plasmodium protein, unknown function	protein coding gene	N/A	N/A	N/A	N/A
PF3D7_0625900	PF3D7_0625900.1	N/A	Plasmodium falciparum 3D7	Pf3D7_06_v3:1,046,986..1,048,052(+)	conserved Plasmodium protein, unknown function	protein coding gene	N/A	N/A	N/A	N/A
PF3D7_0626000	PF3D7_0626000.1	N/A	Plasmodium falciparum 3D7	Pf3D7_06_v3:1,048,453..1,055,207(-)	conserved Plasmodium protein, unknown function	protein coding gene	N/A	N/A	N/A	N/A
PF3D7_0626100	PF3D7_0626100.1	N/A	Plasmodium falciparum 3D7	Pf3D7_06_v3:1,055,904..1,058,812(+)	oxidoreductase, short-chain dehydrogenase family, putative	protein coding gene	N/A	oxidoreductase activity	N/A	PF00106
PF3D7_0626200	PF3D7_0626200.1	N/A	Plasmodium falciparum 3D7	Pf3D7_06_v3:1,058,496..1,060,180(-)	conserved Plasmodium protein, unknown function	protein coding gene	N/A	N/A	N/A	N/A
PF3D7_0626300	PF3D7_0626300.1	FabB/FabF	Plasmodium falciparum 3D7	Pf3D7_06_v3:1,061,115..1,062,891(-)	3-oxoacyl-acyl-carrier protein synthase I/II	protein coding gene	apicoplast	3-oxoacyl-[acyl-carrier-protein] synthase activity;fatty acid synthase activity	fatty acid biosynthetic process	PF00109;PF02801
PF3D7_0626400	PF3D7_0626400.1	N/A	Plasmodium falciparum 3D7	Pf3D7_06_v3:1,064,859..1,068,640(+)	CRAL/TRIO domain-containing protein, putative	protein coding gene	N/A	N/A	N/A	PF00650
PF3D7_0626500	PF3D7_0626500.1	CEP135	Plasmodium falciparum 3D7	Pf3D7_06_v3:1,069,962..1,072,805(+)	centrosomal protein CEP135, putative	protein coding gene	cytoskeleton	N/A	N/A	N/A
PF3D7_0626600	PF3D7_0626600.1	N/A	Plasmodium falciparum 3D7	Pf3D7_06_v3:1,073,363..1,074,436(-)	conserved Plasmodium protein, unknown function	protein coding gene	N/A	N/A	N/A	N/A
PF3D7_0626700	PF3D7_0626700.1	N/A	Plasmodium falciparum 3D7	Pf3D7_06_v3:1,074,341..1,076,871(+)	ATPase	protein coding gene	cytoplasm;nucleus	ATP binding;ATP hydrolysis activity	N/A	PF03690
PF3D7_0626800	PF3D7_0626800.1	PyrK	Plasmodium falciparum 3D7	Pf3D7_06_v3:1,078,020..1,082,073(+)	pyruvate kinase	protein coding gene	cytoplasm	RNA binding;pyruvate kinase activity	glycolytic process;protein homotetramerization	PF00224;PF02887
PF3D7_0626900	PF3D7_0626900.1	N/A	Plasmodium falciparum 3D7	Pf3D7_06_v3:1,082,531..1,084,389(+)	ribosomal protein L46, mitochondrial, putative	protein coding gene	mitochondrial large ribosomal subunit;mitochondrion	structural constituent of ribosome	N/A	N/A
PF3D7_0627000	PF3D7_0627000.1	N/A	Plasmodium falciparum 3D7	Pf3D7_06_v3:1,084,110..1,087,609(-)	conserved Plasmodium protein, unknown function	protein coding gene	N/A	N/A	N/A	N/A
PF3D7_0627100	PF3D7_0627100.1	N/A	Plasmodium falciparum 3D7	Pf3D7_06_v3:1,087,078..1,094,389(+)	ankyrin-repeat protein, putative	protein coding gene	N/A	N/A	N/A	PF12796
PF3D7_0627200	PF3D7_0627200.1	N/A	Plasmodium falciparum 3D7	Pf3D7_06_v3:1,094,737..1,096,373(-)	myosin light chain, putative	protein coding gene	N/A	N/A	N/A	PF13499
PF3D7_0627300	PF3D7_0627300.1	RNF5	Plasmodium falciparum 3D7	Pf3D7_06_v3:1,096,654..1,098,696(-)	E3 ubiquitin-protein ligase RNF5, putative	protein coding gene	N/A	ubiquitin protein ligase activity;ubiquitin-like protein conjugating enzyme binding;zinc ion binding	ER-associated misfolded protein catabolic process;ubiquitin-dependent protein catabolic process	PF13920
PF3D7_0627400	PF3D7_0627400.1	TIM22	Plasmodium falciparum 3D7	Pf3D7_06_v3:1,099,753..1,100,995(-)	mitochondrial import inner membrane translocase subunit TIM22, putative	protein coding gene	TIM22 mitochondrial import inner membrane insertion complex;TIM23 mitochondrial import inner membrane translocase complex;mitochondrion	mitochondrion targeting sequence binding;protein transmembrane transporter activity	protein insertion into mitochondrial inner membrane;protein targeting to mitochondrion	PF02466
PF3D7_0627500	PF3D7_0627500.1	DJ1	Plasmodium falciparum 3D7	Pf3D7_06_v3:1,100,997..1,103,240(-)	protein DJ-1	protein coding gene	cell surface;cytosol;nucleus	peptidase activity;protein deglycase activity	guanine deglycation, glyoxal removal;protein deglycation;protein deglycation, glyoxal removal;protein folding;thiamine biosynthetic process	PF01965
PF3D7_0627600	PF3D7_0627600.1	N/A	Plasmodium falciparum 3D7	Pf3D7_06_v3:1,103,388..1,105,825(+)	conserved Plasmodium protein, unknown function	protein coding gene	N/A	N/A	N/A	N/A
PF3D7_0627700	PF3D7_0627700.1	N/A	Plasmodium falciparum 3D7	Pf3D7_06_v3:1,105,837..1,113,416(+)	transportin	protein coding gene	apicoplast;cytoplasm;nuclear pore;nucleus	nuclear import signal receptor activity;nuclear localization sequence binding;protein transmembrane transporter activity	protein import into nucleus	PF03810;PF13513
PF3D7_0627800	PF3D7_0627800.1	ACAS	Plasmodium falciparum 3D7	Pf3D7_06_v3:1,113,448..1,117,623(-)	acetyl-CoA synthetase	protein coding gene	nucleus	acetate-CoA ligase activity	acetyl-CoA biosynthetic process;chromatin organization;generation of precursor metabolites and energy;histone acetylation;response to xenobiotic stimulus	PF00501;PF13193;PF16177
PF3D7_0627900	PF3D7_0627900.1	POP4	Plasmodium falciparum 3D7	Pf3D7_06_v3:1,118,231..1,121,193(+)	ribonuclease P protein subunit p29, putative	protein coding gene	ribonuclease MRP complex;ribonuclease P complex	ribonuclease P RNA binding;ribonuclease activity	rRNA processing	PF01868
PF3D7_0628000	PF3D7_0628000.1	PTPS	Plasmodium falciparum 3D7	Pf3D7_06_v3:1,121,527..1,122,523(+)	6-pyruvoyltetrahydropterin synthase	protein coding gene	N/A	6-pyruvoyltetrahydropterin synthase activity	tetrahydrobiopterin biosynthetic process	PF01242
PF3D7_0628100	PF3D7_0628100.1	HECT1	Plasmodium falciparum 3D7	Pf3D7_06_v3:1,122,322..1,154,481(-)	HECT domain-containing protein 1, putative	protein coding gene	N/A	ubiquitin protein ligase activity	N/A	PF12796
PF3D7_0628200	PF3D7_0628200.1	PK4	Plasmodium falciparum 3D7	Pf3D7_06_v3:1,158,605..1,169,668(+)	eukaryotic translation initiation factor 2-alpha kinase	protein coding gene	extracellular vesicle;nucleus	elongation factor-2 kinase activity;protein kinase activity;protein tyrosine kinase activity	mitotic cell cycle checkpoint signaling;protein phosphorylation;response to xenobiotic stimulus	PF00069
PF3D7_0628300	PF3D7_0628300.1	CEPT	Plasmodium falciparum 3D7	Pf3D7_06_v3:1,169,270..1,174,371(-)	choline/ethanolaminephosphotransferase, putative	protein coding gene	endoplasmic reticulum	RNA binding	N/A	PF01066
PF3D7_0628400	PF3D7_0628400.1	N/A	Plasmodium falciparum 3D7	Pf3D7_06_v3:1,175,869..1,178,588(+)	protease, putative	protein coding gene	integral component of membrane	N/A	N/A	PF13367
PF3D7_0628500	PF3D7_0628500.1	N/A	Plasmodium falciparum 3D7	Pf3D7_06_v3:1,178,630..1,180,100(-)	conserved Plasmodium protein, unknown function	protein coding gene	N/A	N/A	N/A	N/A
PF3D7_0628600	PF3D7_0628600.1	N/A	Plasmodium falciparum 3D7	Pf3D7_06_v3:1,180,102..1,182,381(-)	DNA methyltransferase 1-associated protein 1, putative	protein coding gene	NuA4 histone acetyltransferase complex;Swr1 complex	transcription corepressor activity	histone H2A acetylation;histone H4 acetylation;histone exchange;negative regulation of transcription by RNA polymerase II	PF16282
PF3D7_0628700	PF3D7_0628700.1	N/A	Plasmodium falciparum 3D7	Pf3D7_06_v3:1,183,134..1,185,887(+)	conserved Plasmodium protein, unknown function	protein coding gene	N/A	N/A	N/A	N/A
PF3D7_0628800	PF3D7_0628800.1	GATB	Plasmodium falciparum 3D7	Pf3D7_06_v3:1,184,868..1,189,014(-)	glutamyl-tRNA(Gln) amidotransferase subunit B	protein coding gene	apicoplast;glutamyl-tRNA(Gln) amidotransferase complex;mitochondrion	glutaminyl-tRNA synthase (glutamine-hydrolyzing) activity	glutaminyl-tRNAGln biosynthesis via transamidation;glutamyl-tRNA aminoacylation;mitochondrial translation;translation	PF02637;PF02934
PF3D7_0628900	PF3D7_0628900.1	N/A	Plasmodium falciparum 3D7	Pf3D7_06_v3:1,189,472..1,193,978(+)	RAP protein, putative	protein coding gene	N/A	N/A	N/A	N/A
PF3D7_0629000	PF3D7_0629000.1	GNA1	Plasmodium falciparum 3D7	Pf3D7_06_v3:1,194,304..1,195,217(-)	glucosamine 6-phosphate N-acetyltransferase	protein coding gene	N/A	glucosamine 6-phosphate N-acetyltransferase activity	UDP-N-acetylglucosamine biosynthetic process	PF00583
PF3D7_0629100	PF3D7_0629100.1	NAPRT	Plasmodium falciparum 3D7	Pf3D7_06_v3:1,195,429..1,198,332(-)	nicotinate phosphoribosyltransferase, putative	protein coding gene	cytoplasm;cytosol	nicotinate phosphoribosyltransferase activity	NAD biosynthetic process;NAD salvage	PF17767;PF17956
PF3D7_0629200	PF3D7_0629200.1	N/A	Plasmodium falciparum 3D7	Pf3D7_06_v3:1,198,354..1,202,056(-)	DnaJ protein, putative	protein coding gene	apicoplast;nucleus;symbiont-containing vacuole	RNA binding	response to heat;response to unfolded protein	PF00226;PF01556
PF3D7_0629300	PF3D7_0629300.1	PL	Plasmodium falciparum 3D7	Pf3D7_06_v3:1,204,859..1,208,175(+)	phospholipase, putative	protein coding gene	cell surface;symbiont-containing vacuole membrane	hydrolase activity;lipase activity;phosphatidylcholine-sterol O-acyltransferase activity;phospholipase activity;triglyceride lipase activity	entry into host;exit from host cell;lipid metabolic process	PF02450
PF3D7_0629400	PF3D7_0629400.1	PABP3	Plasmodium falciparum 3D7	Pf3D7_06_v3:1,209,083..1,213,867(+)	polyadenylate-binding protein 3, putative	protein coding gene	cytosol;nucleus	RNA binding;mRNA binding	N/A	PF00076
PF3D7_0629500	PF3D7_0629500.1	AAT1	Plasmodium falciparum 3D7	Pf3D7_06_v3:1,213,102..1,217,313(-)	amino acid transporter AAT1	protein coding gene	food vacuole;plasma membrane	amino acid transmembrane transporter activity;xenobiotic transmembrane transporter activity	amino acid transmembrane transport;amino acid transport;response to xenobiotic stimulus	PF01490
PF3D7_0629600	PF3D7_0629600.1	N/A	Plasmodium falciparum 3D7	Pf3D7_06_v3:1,217,321..1,219,766(+)	ribosomal RNA-processing protein 7, putative	protein coding gene	CURI complex;UTP-C complex	N/A	rRNA processing;ribosomal small subunit assembly	PF12923
PF3D7_0629700	PF3D7_0629700.1	SET1	Plasmodium falciparum 3D7	Pf3D7_06_v3:1,221,309..1,243,267(+)	SET domain protein, putative	protein coding gene	histone methyltransferase complex;nucleus	histone methyltransferase activity (H3-K4 specific);protein binding;protein domain specific binding	histone H3-K4 methylation;positive regulation of transcription, DNA-templated	N/A
PF3D7_0629800	PF3D7_0629800.1	N/A	Plasmodium falciparum 3D7	Pf3D7_06_v3:1,243,321..1,247,814(-)	cullin-2, putative	protein coding gene	cullin-RING ubiquitin ligase complex;osmiophilic body	protein binding;ubiquitin protein ligase binding;ubiquitin-protein transferase activity	G1/S transition of mitotic cell cycle;protein ubiquitination;regulation of cell cycle	PF00888
PF3D7_0629900	PF3D7_0629900.1	N/A	Plasmodium falciparum 3D7	Pf3D7_06_v3:1,248,188..1,251,651(+)	CRAL/TRIO domain-containing protein, putative	protein coding gene	Golgi apparatus	N/A	vesicle-mediated transport	PF00650
PF3D7_0630000	PF3D7_0630000.1	N/A	Plasmodium falciparum 3D7	Pf3D7_06_v3:1,252,052..1,253,985(-)	CPW-WPC family protein	protein coding gene	N/A	N/A	N/A	PF09717
PF3D7_0630100	PF3D7_0630100.1	N/A	Plasmodium falciparum 3D7	Pf3D7_06_v3:1,254,330..1,256,987(-)	alpha/beta hydrolase, putative	protein coding gene	N/A	N/A	N/A	N/A
PF3D7_0630200	PF3D7_0630200.1	PSOP6	Plasmodium falciparum 3D7	Pf3D7_06_v3:1,258,880..1,259,939(+)	secreted ookinete protein, putative	protein coding gene	N/A	N/A	N/A	N/A
PF3D7_0630300	PF3D7_0630300.1	N/A	Plasmodium falciparum 3D7	Pf3D7_06_v3:1,260,163..1,270,722(-)	DNA polymerase epsilon catalytic subunit A, putative	protein coding gene	epsilon DNA polymerase complex	DNA binding;DNA-directed DNA polymerase activity;single-stranded DNA 3'-5' exodeoxyribonuclease activity	DNA replication proofreading;DNA-dependent DNA replication;base-excision repair, gap-filling;leading strand elongation;mitotic cell cycle;nucleotide-excision repair, DNA gap filling	PF03104
PF3D7_0630400	PF3D7_0630400.1	N/A	Plasmodium falciparum 3D7	Pf3D7_06_v3:1,271,808..1,274,009(-)	conserved Plasmodium protein, unknown function	protein coding gene	N/A	N/A	N/A	PF00839
PF3D7_0630500	PF3D7_0630500.1	YTM1	Plasmodium falciparum 3D7	Pf3D7_06_v3:1,275,505..1,278,363(+)	ribosome biogenesis protein YTM1, putative	protein coding gene	PeBoW complex;nucleolus;preribosome, large subunit precursor	cytoskeletal protein binding	cytoskeleton organization;ribosomal large subunit biogenesis	PF00400;PF08154
PF3D7_0630600	PF3D7_0630600.1	N/A	Plasmodium falciparum 3D7	Pf3D7_06_v3:1,279,742..1,283,475(+)	deubiquitinating enzyme MINDY, putative	protein coding gene	N/A	N/A	N/A	PF13898
PF3D7_0630700	PF3D7_0630700.1	N/A	Plasmodium falciparum 3D7	Pf3D7_06_v3:1,284,439..1,287,109(+)	bifunctional methylenetetrahydrofolate dehydrogenase/cyclohydrolase, putative	protein coding gene	cytosol;mitochondrion	methenyltetrahydrofolate cyclohydrolase activity;methylenetetrahydrofolate dehydrogenase (NADP+) activity	one-carbon metabolic process;tetrahydrofolate interconversion	PF00763;PF02882
PF3D7_0630800	PF3D7_0630800.1	N/A	Plasmodium falciparum 3D7	Pf3D7_06_v3:1,288,066..1,290,942(+)	TPH domain-containing protein, putative	protein coding gene	N/A	N/A	N/A	PF13868
PF3D7_0630900	PF3D7_0630900.1	HAS1	Plasmodium falciparum 3D7	Pf3D7_06_v3:1,290,623..1,293,448(-)	ATP-dependent RNA helicase HAS1	protein coding gene	nucleolus	RNA binding;RNA helicase activity	DNA duplex unwinding;RNA metabolic process;RNA secondary structure unwinding;maturation of LSU-rRNA from tricistronic rRNA transcript (SSU-rRNA, 5.8S rRNA, LSU-rRNA)	PF00270;PF00271;PF13959
PF3D7_0631000	PF3D7_0631000.1	N/A	Plasmodium falciparum 3D7	Pf3D7_06_v3:1,293,965..1,296,496(+)	tetratricopeptide repeat protein, putative	protein coding gene	anaphase-promoting complex;cytoplasm	N/A	anaphase-promoting complex-dependent catabolic process;cell division;metaphase/anaphase transition of mitotic cell cycle;positive regulation of mitotic metaphase/anaphase transition;protein ubiquitination	PF13181
PF3D7_0631100	PF3D7_0631100.1	N/A	Plasmodium falciparum 3D7	Pf3D7_06_v3:1,297,376..1,300,414(+)	Plasmodium exported protein (PHISTb), unknown function	protein coding gene	host cell	N/A	N/A	PF09687
PF3D7_0631300	PF3D7_0631300.1	EPF1	Plasmodium falciparum 3D7	Pf3D7_06_v3:1,316,873..1,317,721(+)	exported protein family 1	protein coding gene	Maurer's cleft	N/A	N/A	PF14308
PF3D7_0631400	PF3D7_0631400.1	MC-2TM	Plasmodium falciparum 3D7	Pf3D7_06_v3:1,318,327..1,319,116(-)	Pfmc-2TM Maurer's cleft two transmembrane protein	protein coding gene	Maurer's cleft	N/A	N/A	N/A
PF3D7_0631500	PF3D7_0631500.1	EPF3	Plasmodium falciparum 3D7	Pf3D7_06_v3:1,321,320..1,322,094(-)	exported protein family 3	protein coding gene	Maurer's cleft	N/A	N/A	PF09715
PF3D7_0631600	PF3D7_0631600.1	EPF4	Plasmodium falciparum 3D7	Pf3D7_06_v3:1,323,294..1,324,435(+)	exported protein family 4	protein coding gene	Maurer's cleft	N/A	N/A	N/A
PF3D7_0631800	PF3D7_0631800.1	RIF	Plasmodium falciparum 3D7	Pf3D7_06_v3:1,329,771..1,330,963(+)	rifin	protein coding gene	host cell plasma membrane	N/A	antigenic variation	PF02009
PF3D7_0631900	PF3D7_0631900.1	N/A	Plasmodium falciparum 3D7	Pf3D7_06_v3:1,333,013..1,334,035(+)	stevor	protein coding gene	Maurer's cleft;host cell membrane;rhoptry	N/A	entry into host;modulation by symbiont of host erythrocyte aggregation	PF17410
PF3D7_0632000	PF3D7_0632000.1	RIF	Plasmodium falciparum 3D7	Pf3D7_06_v3:1,336,146..1,337,473(+)	rifin	protein coding gene	Maurer's cleft;host cell plasma membrane;symbiont-containing vacuole	N/A	antigenic variation;cytoadherence to microvasculature, mediated by symbiont protein;modulation by symbiont of host erythrocyte aggregation	PF02009
PF3D7_0632100	PF3D7_0632100.1	RIF	Plasmodium falciparum 3D7	Pf3D7_06_v3:1,338,218..1,339,417(-)	rifin	protein coding gene	Maurer's cleft;host cell plasma membrane;symbiont-containing vacuole	N/A	antigenic variation;cytoadherence to microvasculature, mediated by symbiont protein;modulation by symbiont of host erythrocyte aggregation	PF02009
PF3D7_0632200	PF3D7_0632200.1	RIF	Plasmodium falciparum 3D7	Pf3D7_06_v3:1,341,307..1,342,595(-)	rifin	protein coding gene	Maurer's cleft;host cell plasma membrane;symbiont-containing vacuole	N/A	antigenic variation;cytoadherence to microvasculature, mediated by symbiont protein;modulation by symbiont of host erythrocyte aggregation	PF02009
PF3D7_0632300	PF3D7_0632300.1	RIF	Plasmodium falciparum 3D7	Pf3D7_06_v3:1,347,341..1,348,571(+)	rifin	protein coding gene	host cell plasma membrane	N/A	antigenic variation	PF02009
PF3D7_0632400	PF3D7_0632400.1	RIF	Plasmodium falciparum 3D7	Pf3D7_06_v3:1,350,724..1,352,087(+)	rifin	protein coding gene	Maurer's cleft;host cell plasma membrane;symbiont-containing vacuole	protein binding	antigenic variation;cytoadherence to microvasculature, mediated by symbiont protein;modulation by symbiont of host erythrocyte aggregation	PF02009
PF3D7_0632500	PF3D7_0632500.1	VAR	Plasmodium falciparum 3D7	Pf3D7_06_v3:1,353,946..1,366,430(-)	erythrocyte membrane protein 1, PfEMP1	protein coding gene	host cell plasma membrane;infected host cell surface knob	cell adhesion molecule binding	antigenic variation;cell-cell adhesion;cytoadherence to microvasculature, mediated by symbiont protein;modulation by symbiont of host erythrocyte aggregation	PF03011;PF05424;PF15445;PF15447
PF3D7_0632700	PF3D7_0632700.1	RIF	Plasmodium falciparum 3D7	Pf3D7_06_v3:1,371,501..1,372,861(+)	rifin	protein coding gene	Maurer's cleft;host cell plasma membrane;symbiont-containing vacuole	N/A	antigenic variation;cytoadherence to microvasculature, mediated by symbiont protein;modulation by symbiont of host erythrocyte aggregation	PF02009
PF3D7_0632800	PF3D7_0632800.1	VAR	Plasmodium falciparum 3D7	Pf3D7_06_v3:1,374,797..1,382,627(-)	erythrocyte membrane protein 1, PfEMP1	protein coding gene	host cell plasma membrane;infected host cell surface knob	cell adhesion molecule binding	antigenic variation;cell-cell adhesion;cytoadherence to microvasculature, mediated by symbiont protein;modulation by symbiont of host erythrocyte aggregation	PF03011;PF05424;PF15445;PF15447;PF18562
PF3D7_0700100	PF3D7_0700100.1	VAR	Plasmodium falciparum 3D7	Pf3D7_07_v3:20,307..28,083(+)	erythrocyte membrane protein 1, PfEMP1	protein coding gene	N/A	N/A	N/A	PF03011;PF05424;PF15445;PF15447;PF18562
PF3D7_0700200	PF3D7_0700200.1	RIF	Plasmodium falciparum 3D7	Pf3D7_07_v3:30,097..31,269(+)	rifin	protein coding gene	Maurer's cleft;host cell plasma membrane;symbiont-containing vacuole	N/A	antigenic variation;cytoadherence to microvasculature, mediated by symbiont protein;modulation by symbiont of host erythrocyte aggregation	PF02009
PF3D7_0700300	PF3D7_0700300.1	RIF	Plasmodium falciparum 3D7	Pf3D7_07_v3:33,585..34,804(-)	rifin	protein coding gene	Maurer's cleft;host cell plasma membrane;symbiont-containing vacuole	N/A	antigenic variation;cytoadherence to microvasculature, mediated by symbiont protein;modulation by symbiont of host erythrocyte aggregation	PF02009
PF3D7_0700400	PF3D7_0700400.1	N/A	Plasmodium falciparum 3D7	Pf3D7_07_v3:36,922..37,927(-)	stevor	protein coding gene	Maurer's cleft	N/A	modulation by symbiont of host erythrocyte aggregation	PF17410
PF3D7_0700500	PF3D7_0700500.1	RIF	Plasmodium falciparum 3D7	Pf3D7_07_v3:40,288..41,453(-)	rifin	protein coding gene	Maurer's cleft;host cell plasma membrane;symbiont-containing vacuole	N/A	antigenic variation;cytoadherence to microvasculature, mediated by symbiont protein;modulation by symbiont of host erythrocyte aggregation	PF02009
PF3D7_0700800	PF3D7_0700800.1	MC-2TM	Plasmodium falciparum 3D7	Pf3D7_07_v3:47,992..49,535(+)	Pfmc-2TM Maurer's cleft two transmembrane protein	protein coding gene	Maurer's cleft;integral component of membrane	N/A	translocation of peptides or proteins into host	N/A
PF3D7_0701100	PF3D7_0701100.1	RIF	Plasmodium falciparum 3D7	Pf3D7_07_v3:55,562..56,781(-)	rifin	protein coding gene	Maurer's cleft;host cell plasma membrane;symbiont-containing vacuole	N/A	antigenic variation;cytoadherence to microvasculature, mediated by symbiont protein;modulation by symbiont of host erythrocyte aggregation	PF02009
PF3D7_0701500	PF3D7_0701500.1	EPF3	Plasmodium falciparum 3D7	Pf3D7_07_v3:68,066..68,840(+)	exported protein family 3	protein coding gene	Maurer's cleft;host cell cytoplasm	N/A	N/A	PF09715
PF3D7_0701600	PF3D7_0701600.1	MC-2TM	Plasmodium falciparum 3D7	Pf3D7_07_v3:70,781..72,205(+)	Pfmc-2TM Maurer's cleft two transmembrane protein	protein coding gene	Maurer's cleft;integral component of membrane	N/A	translocation of peptides or proteins into host	N/A
PF3D7_0701700	PF3D7_0701700.1	EPF1	Plasmodium falciparum 3D7	Pf3D7_07_v3:72,477..73,325(-)	exported protein family 1	protein coding gene	Maurer's cleft	N/A	N/A	PF14308
PF3D7_0701800	PF3D7_0701800.1	RIF	Plasmodium falciparum 3D7	Pf3D7_07_v3:75,918..77,055(-)	rifin	protein coding gene	Maurer's cleft;host cell plasma membrane;symbiont-containing vacuole	N/A	antigenic variation;cytoadherence to microvasculature, mediated by symbiont protein;modulation by symbiont of host erythrocyte aggregation	PF02009
PF3D7_0701900	PF3D7_0701900.1	N/A	Plasmodium falciparum 3D7	Pf3D7_07_v3:79,450..83,835(-)	Plasmodium exported protein, unknown function	protein coding gene	Maurer's cleft;host cell periphery	protein binding	N/A	N/A
PF3D7_0702000	PF3D7_0702000.1	N/A	Plasmodium falciparum 3D7	Pf3D7_07_v3:83,838..86,436(+)	Plasmodium exported protein (hyp12), unknown function	protein coding gene	Maurer's cleft;host cell	N/A	N/A	N/A
PF3D7_0702200	PF3D7_0702200.1	LPL20	Plasmodium falciparum 3D7	Pf3D7_07_v3:91,731..95,602(-)	lysophospholipase LPL20	protein coding gene	cell periphery;cytosol;membrane;vesicle	hydrolase activity;lipase activity;lysophospholipase activity	glycerophospholipid catabolic process;phospholipid metabolic process	PF12146
PF3D7_0702300	PF3D7_0702300.1	STARP	Plasmodium falciparum 3D7	Pf3D7_07_v3:95,444..99,176(+)	sporozoite threonine and asparagine-rich protein	protein coding gene	cell surface	N/A	N/A	N/A
PF3D7_0702400	PF3D7_0702400.1	SEMP1	Plasmodium falciparum 3D7	Pf3D7_07_v3:100,338..103,399(+)	small exported membrane protein 1	protein coding gene	Maurer's cleft;extracellular vesicle;host cell cytoplasm;host cell membrane;nucleus	protein binding	N/A	N/A
PF3D7_0702500	PF3D7_0702500.1	N/A	Plasmodium falciparum 3D7	Pf3D7_07_v3:104,012..106,731(-)	Plasmodium exported protein, unknown function	protein coding gene	Maurer's cleft;extracellular vesicle;host cell cytoplasm;nucleus	protein binding	N/A	N/A
PF3D7_0702600	PF3D7_0702600.1	N/A	Plasmodium falciparum 3D7	Pf3D7_07_v3:109,915..110,178(+)	chitinase, fragment	protein coding gene	N/A	N/A	N/A	N/A
PF3D7_0702900	PF3D7_0702900.1	N/A	Plasmodium falciparum 3D7	Pf3D7_07_v3:112,576..114,405(-)	centrin, putative	protein coding gene	N/A	protein binding	N/A	PF10591
PF3D7_0703000	PF3D7_0703000.1	N/A	Plasmodium falciparum 3D7	Pf3D7_07_v3:115,122..120,892(+)	conserved Plasmodium protein, unknown function	protein coding gene	N/A	N/A	N/A	N/A
PF3D7_0703100	PF3D7_0703100.1	CIA2	Plasmodium falciparum 3D7	Pf3D7_07_v3:121,061..122,407(+)	cytosolic iron-sulfur assembly component 2, putative	protein coding gene	CIA complex	N/A	iron-sulfur cluster assembly;protein maturation by iron-sulfur cluster transfer	PF01883
PF3D7_0703200	PF3D7_0703200.1	N/A	Plasmodium falciparum 3D7	Pf3D7_07_v3:122,013..127,441(-)	conserved Plasmodium protein, unknown function	protein coding gene	nucleus	N/A	N/A	N/A
PF3D7_0703300	PF3D7_0703300.1	N/A	Plasmodium falciparum 3D7	Pf3D7_07_v3:128,111..129,083(+)	conserved Plasmodium protein, unknown function	protein coding gene	N/A	N/A	N/A	N/A
PF3D7_0703400	PF3D7_0703400.1	N/A	Plasmodium falciparum 3D7	Pf3D7_07_v3:129,160..132,186(-)	conserved Plasmodium protein, unknown function	protein coding gene	N/A	N/A	N/A	N/A
PF3D7_0703500	PF3D7_0703500.1	N/A	Plasmodium falciparum 3D7	Pf3D7_07_v3:133,470..143,247(+)	erythrocyte membrane-associated antigen	protein coding gene	membrane;nucleus	RNA binding;mRNA binding	N/A	PF13086;PF13087
PF3D7_0703600	PF3D7_0703600.1	N/A	Plasmodium falciparum 3D7	Pf3D7_07_v3:143,601..146,565(+)	conserved protein, unknown function	protein coding gene	nucleus	N/A	N/A	N/A
PF3D7_0703700	PF3D7_0703700.1	N/A	Plasmodium falciparum 3D7	Pf3D7_07_v3:146,573..148,237(-)	conserved protein, unknown function	protein coding gene	nucleus	N/A	N/A	N/A
PF3D7_0703800	PF3D7_0703800.1	N/A	Plasmodium falciparum 3D7	Pf3D7_07_v3:149,804..152,980(+)	conserved Plasmodium protein, unknown function	protein coding gene	N/A	N/A	N/A	N/A
PF3D7_0703900	PF3D7_0703900.1	N/A	Plasmodium falciparum 3D7	Pf3D7_07_v3:153,119..167,024(-)	conserved Plasmodium membrane protein, unknown function	protein coding gene	integral component of membrane;nucleus	WW domain binding	N/A	N/A
PF3D7_0704000	PF3D7_0704000.1	N/A	Plasmodium falciparum 3D7	Pf3D7_07_v3:167,240..177,537(-)	conserved Plasmodium membrane protein, unknown function	protein coding gene	integral component of membrane	N/A	N/A	N/A
PF3D7_0704100	PF3D7_0704100.1	BTP2	Plasmodium falciparum 3D7	Pf3D7_07_v3:179,797..191,155(+)	basal complex transmembrane protein 2	protein coding gene	basal part of cell;inner membrane pellicle complex	N/A	N/A	N/A
PF3D7_0704200	PF3D7_0704200.1	NSUN1	Plasmodium falciparum 3D7	Pf3D7_07_v3:190,990..195,252(-)	RNA cytosine C(5)-methyltransferase, putative	protein coding gene	N/A	methyltransferase activity	RNA methylation	PF01189
PF3D7_0704300	PF3D7_0704300.1	N/A	Plasmodium falciparum 3D7	Pf3D7_07_v3:196,266..203,802(+)	conserved Plasmodium membrane protein, unknown function	protein coding gene	integral component of membrane	N/A	N/A	N/A
PF3D7_0704400	PF3D7_0704400.1	N/A	Plasmodium falciparum 3D7	Pf3D7_07_v3:204,333..208,447(+)	phosphoinositide-binding protein, putative	protein coding gene	nucleus;transcription factor TFIID complex	transcription coactivator activity	histone H3 acetylation;regulation of transcription, DNA-templated;transcription initiation from RNA polymerase II promoter	PF00787
PF3D7_0704500	PF3D7_0704500.1	N/A	Plasmodium falciparum 3D7	Pf3D7_07_v3:207,891..213,784(-)	serine/threonine protein kinase, putative	protein coding gene	extracellular vesicle	N/A	N/A	PF00069
PF3D7_0704600	PF3D7_0704600.1	UT	Plasmodium falciparum 3D7	Pf3D7_07_v3:214,949..230,713(-)	HECT-type E3 ubiquitin ligase UT	protein coding gene	Golgi apparatus;endoplasmic reticulum	ubiquitin-protein transferase activity	response to drug;response to xenobiotic stimulus	PF00632
PF3D7_0704700	PF3D7_0704700.1	PPAT	Plasmodium falciparum 3D7	Pf3D7_07_v3:232,362..237,763(+)	phosphopantetheine adenylyltransferase, putative	protein coding gene	centrosome;cyclin-dependent protein kinase holoenzyme complex;cytoplasm;nucleus	cyclin-dependent protein serine/threonine kinase regulator activity	mitotic cell cycle phase transition;regulation of cyclin-dependent protein serine/threonine kinase activity	N/A
PF3D7_0704800	PF3D7_0704800.1	PPM12	Plasmodium falciparum 3D7	Pf3D7_07_v3:237,810..242,106(-)	protein phosphatase PPM12, putative	protein coding gene	N/A	N/A	N/A	PF13599
PF3D7_0704900	PF3D7_0704900.1	RF2	Plasmodium falciparum 3D7	Pf3D7_07_v3:243,898..245,016(-)	peptide chain release factor 2	protein coding gene	apicoplast	ribosome binding;translation release factor activity	translational termination	PF00472;PF03462
PF3D7_0705000	PF3D7_0705000.1	N/A	Plasmodium falciparum 3D7	Pf3D7_07_v3:245,497..250,602(-)	mRNA cap guanine-N7 methyltransferase, putative	protein coding gene	mRNA cap binding complex;nucleus	mRNA (guanine-N7-)-methyltransferase activity	7-methylguanosine mRNA capping	PF03291
PF3D7_0705100	PF3D7_0705100.1	N/A	Plasmodium falciparum 3D7	Pf3D7_07_v3:251,976..255,484(+)	conserved Plasmodium protein, unknown function	protein coding gene	N/A	N/A	N/A	N/A
PF3D7_0705200	PF3D7_0705200.1	N/A	Plasmodium falciparum 3D7	Pf3D7_07_v3:255,871..260,931(+)	conserved Plasmodium protein, unknown function	protein coding gene	N/A	N/A	N/A	N/A
PF3D7_0705300	PF3D7_0705300.1	ORC2	Plasmodium falciparum 3D7	Pf3D7_07_v3:261,340..264,630(+)	origin recognition complex subunit 2	protein coding gene	endoplasmic reticulum;mitochondrion;nuclear origin of replication recognition complex;nuclear periphery;nucleus	DNA replication origin binding	DNA replication initiation	PF04084
PF3D7_0705400	PF3D7_0705400.1	MCM7	Plasmodium falciparum 3D7	Pf3D7_07_v3:264,682..267,876(-)	DNA replication licensing factor MCM7	protein coding gene	MCM complex;cytoplasm;nucleus	ATP-dependent activity, acting on DNA;DNA replication origin binding;protein binding;single-stranded DNA binding	DNA replication initiation;DNA strand elongation involved in DNA replication;DNA unwinding involved in DNA replication;double-strand break repair via break-induced replication;pre-replicative complex assembly involved in nuclear cell cycle DNA replication	PF00493;PF14551;PF17207;PF17855
PF3D7_0705500	PF3D7_0705500.1	N/A	Plasmodium falciparum 3D7	Pf3D7_07_v3:269,635..280,332(-)	inositol-phosphate phosphatase, putative	protein coding gene	N/A	phosphatidylinositol-4,5-bisphosphate 5-phosphatase activity	inositol phosphate dephosphorylation;phosphatidylinositol dephosphorylation	PF02383
PF3D7_0705600	PF3D7_0705600.1	N/A	Plasmodium falciparum 3D7	Pf3D7_07_v3:280,570..284,888(-)	RNA helicase, putative	protein coding gene	cytoplasm;nucleus;ribonucleoprotein complex	RNA binding;RNA helicase activity	N/A	PF00271
PF3D7_0705700	PF3D7_0705700.1	N/A	Plasmodium falciparum 3D7	Pf3D7_07_v3:285,012..286,963(-)	40S ribosomal protein S29, putative	protein coding gene	cytosolic small ribosomal subunit;nucleus	structural constituent of ribosome;zinc ion binding	N/A	PF00253
PF3D7_0705800	PF3D7_0705800.1	CRISP	Plasmodium falciparum 3D7	Pf3D7_07_v3:287,597..289,088(-)	cysteine-rich secretory protein	protein coding gene	apical part of cell;extracellular space;host cell cytoplasm	N/A	N/A	PF00188
PF3D7_0705900	PF3D7_0705900.1	N/A	Plasmodium falciparum 3D7	Pf3D7_07_v3:289,460..291,545(-)	ATP synthase subunit C, putative	protein coding gene	Maurer's cleft;mitochondrial proton-transporting ATP synthase complex, coupling factor F(o);mitochondrion;proton-transporting ATP synthase complex, coupling factor F(o)	proton-transporting ATP synthase activity, rotational mechanism	ATP synthesis coupled proton transport	PF00137
PF3D7_0706000	PF3D7_0706000.1	N/A	Plasmodium falciparum 3D7	Pf3D7_07_v3:292,228..297,493(+)	importin-7, putative	protein coding gene	cytoplasm;cytosol;nuclear envelope;nuclear pore;nucleus	N/A	protein import into nucleus	PF03810
PF3D7_0706100	PF3D7_0706100.1	N/A	Plasmodium falciparum 3D7	Pf3D7_07_v3:297,233..303,776(-)	conserved Plasmodium protein, unknown function	protein coding gene	apicoplast	N/A	N/A	N/A
PF3D7_0706200	PF3D7_0706200.1	N/A	Plasmodium falciparum 3D7	Pf3D7_07_v3:303,964..305,242(+)	conserved protein, unknown function	protein coding gene	N/A	N/A	N/A	N/A
PF3D7_0706300	PF3D7_0706300.1	N/A	Plasmodium falciparum 3D7	Pf3D7_07_v3:305,264..306,466(+)	conserved Plasmodium protein, unknown function	protein coding gene	N/A	N/A	N/A	N/A
PF3D7_0706400	PF3D7_0706400.1	RPL37	Plasmodium falciparum 3D7	Pf3D7_07_v3:306,475..308,427(-)	60S ribosomal protein L37	protein coding gene	cytosolic large ribosomal subunit	RNA binding	N/A	PF01907
PF3D7_0706500	PF3D7_0706500.1	N/A	Plasmodium falciparum 3D7	Pf3D7_07_v3:309,725..316,861(-)	conserved Plasmodium protein, unknown function	protein coding gene	nucleus	RNA binding;mRNA binding	N/A	N/A
PF3D7_0706600	PF3D7_0706600.1	N/A	Plasmodium falciparum 3D7	Pf3D7_07_v3:319,757..322,639(+)	conserved Plasmodium protein, unknown function	protein coding gene	N/A	N/A	N/A	N/A
PF3D7_0706700	PF3D7_0706700.1	MSH2-2	Plasmodium falciparum 3D7	Pf3D7_07_v3:322,907..325,528(+)	DNA mismatch repair protein MSH2, putative	protein coding gene	MutSalpha complex;MutSbeta complex;mismatch repair complex;nucleus	ATP-dependent activity, acting on DNA;double-strand/single-strand DNA junction binding	DNA recombination;maintenance of DNA repeat elements;mismatch repair;negative regulation of DNA recombination;postreplication repair	PF00488;PF05192
PF3D7_0707200	PF3D7_0707200.1	N/A	Plasmodium falciparum 3D7	Pf3D7_07_v3:329,719..336,587(-)	conserved Plasmodium protein, unknown function	protein coding gene	RNA N6-methyladenosine methyltransferase complex	lysine-acetylated histone binding	N/A	N/A
PF3D7_0707300	PF3D7_0707300.1	RAMA	Plasmodium falciparum 3D7	Pf3D7_07_v3:337,720..343,059(+)	rhoptry-associated membrane antigen	protein coding gene	Golgi apparatus;anchored component of membrane;endoplasmic reticulum;membrane raft;nucleus;rhoptry;rhoptry membrane;symbiont-containing vacuole	protein binding	cell-cell adhesion;cellular protein localization;entry into host	N/A
PF3D7_0707400	PF3D7_0707400.1	N/A	Plasmodium falciparum 3D7	Pf3D7_07_v3:343,620..346,688(+)	AAA family ATPase, putative	protein coding gene	mitochondrion;nucleus	zinc ion binding	mitochondrion organization	PF00004;PF12037
PF3D7_0707500	PF3D7_0707500.1	N/A	Plasmodium falciparum 3D7	Pf3D7_07_v3:347,664..353,625(+)	conserved Plasmodium protein, unknown function	protein coding gene	N/A	N/A	N/A	N/A
PF3D7_0707600	PF3D7_0707600.1	MED10	Plasmodium falciparum 3D7	Pf3D7_07_v3:353,757..355,465(+)	mediator of RNA polymerase II transcription subunit 10, putative	protein coding gene	mediator complex	N/A	N/A	N/A
PF3D7_0707700	PF3D7_0707700.1	N/A	Plasmodium falciparum 3D7	Pf3D7_07_v3:356,174..360,641(+)	E3 ubiquitin-protein ligase, putative	protein coding gene	cytoplasm;nucleus	chaperone binding;ubiquitin protein ligase activity	cellular response to misfolded protein;positive regulation of proteolysis;proteasome-mediated ubiquitin-dependent protein catabolic process;protein polyubiquitination;protein quality control for misfolded or incompletely synthesized proteins	PF04564
PF3D7_0707800	PF3D7_0707800.1	N/A	Plasmodium falciparum 3D7	Pf3D7_07_v3:360,813..365,795(+)	RAP protein, putative	protein coding gene	apicoplast	N/A	N/A	PF08373
PF3D7_0707900	PF3D7_0707900.1	N/A	Plasmodium falciparum 3D7	Pf3D7_07_v3:366,092..368,080(+)	ribosomal protein S8e, putative	protein coding gene	preribosome, large subunit precursor	N/A	maturation of 5.8S rRNA;maturation of LSU-rRNA	PF01201
PF3D7_0708000	PF3D7_0708000.1	N/A	Plasmodium falciparum 3D7	Pf3D7_07_v3:368,274..372,081(+)	cytoskeleton associated protein, putative	protein coding gene	cytoplasm	alpha-tubulin binding	microtubule cytoskeleton organization;post-chaperonin tubulin folding pathway;tubulin complex assembly	PF01302
PF3D7_0708100	PF3D7_0708100.1	RPB10	Plasmodium falciparum 3D7	Pf3D7_07_v3:372,302..373,569(-)	DNA-directed RNA polymerases I, II, and III subunit RPABC5, putative	protein coding gene	RNA polymerase I complex;RNA polymerase II, core complex;RNA polymerase III complex;nucleus	DNA-directed 5'-3' RNA polymerase activity;zinc ion binding	tRNA transcription by RNA polymerase III;transcription by RNA polymerase I;transcription by RNA polymerase II	PF01194
PF3D7_0708200	PF3D7_0708200.1	N/A	Plasmodium falciparum 3D7	Pf3D7_07_v3:374,243..377,393(-)	conserved Plasmodium protein, unknown function	protein coding gene	N/A	N/A	N/A	N/A
PF3D7_0708300	PF3D7_0708300.1	BUD32	Plasmodium falciparum 3D7	Pf3D7_07_v3:377,674..379,642(+)	EKC/KEOPS complex subunit BUD32	protein coding gene	EKC/KEOPS complex;cytoplasm;nucleus	protein binding;protein serine/threonine kinase activity	protein phosphorylation;tRNA threonylcarbamoyladenosine metabolic process	N/A
PF3D7_0708400	PF3D7_0708400.1	HSP90	Plasmodium falciparum 3D7	Pf3D7_07_v3:380,449..385,546(+)	heat shock protein 90	protein coding gene	cell surface;cytoplasm;cytosol;extracellular vesicle;food vacuole;nucleus;perinuclear region of cytoplasm;plasma membrane;protein-containing complex	ATP hydrolysis activity;RNA binding;protein binding;unfolded protein binding	cellular response to heat;protein folding;protein stabilization	PF00183;PF02518
PF3D7_0708500	PF3D7_0708500.1	N/A	Plasmodium falciparum 3D7	Pf3D7_07_v3:385,186..388,646(-)	heat shock protein 86 family protein	protein coding gene	nucleus	N/A	regulation of gene expression;response to heat;response to unfolded protein	PF06047
PF3D7_0708600	PF3D7_0708600.1	IMC1d	Plasmodium falciparum 3D7	Pf3D7_07_v3:389,473..390,365(-)	inner membrane complex protein 1d, putative	protein coding gene	inner membrane pellicle complex	N/A	N/A	N/A
PF3D7_0708700	PF3D7_0708700.1	COX4	Plasmodium falciparum 3D7	Pf3D7_07_v3:390,832..392,770(-)	cytochrome c oxidase subunit 4, putative	protein coding gene	mitochondrion	N/A	N/A	N/A
PF3D7_0708800	PF3D7_0708800.1	HSP110c	Plasmodium falciparum 3D7	Pf3D7_07_v3:393,813..399,112(+)	heat shock protein 110	protein coding gene	cytoplasm;cytosol;inner membrane pellicle complex;nucleus	ATP hydrolysis activity;protein binding	protein folding;response to heat	PF00012
PF3D7_0708900	PF3D7_0708900.1	SCO1	Plasmodium falciparum 3D7	Pf3D7_07_v3:398,963..400,872(-)	protein SCO1, putative	protein coding gene	mitochondrion	N/A	mitochondrial cytochrome c oxidase assembly	PF02630
PF3D7_0709000	PF3D7_0709000.1	CRT	Plasmodium falciparum 3D7	Pf3D7_07_v3:402,385..406,341(+)	chloroquine resistance transporter	protein coding gene	endoplasmic reticulum;food vacuole;integral component of membrane;membrane	ferric iron transmembrane transporter activity;ferrous iron transmembrane transporter activity;xenobiotic transmembrane transporter activity	glutathione transport;peptide transport;response to drug;response to xenobiotic stimulus	PF08627
PF3D7_0709100	PF3D7_0709100.1	N/A	Plasmodium falciparum 3D7	Pf3D7_07_v3:407,818..412,040(+)	Cg1 protein	protein coding gene	N/A	N/A	N/A	PF08755
PF3D7_0709200	PF3D7_0709200.1	GLP3	Plasmodium falciparum 3D7	Pf3D7_07_v3:412,092..413,161(-)	glutaredoxin-like protein	protein coding gene	mitochondrial matrix;mitochondrion	N/A	N/A	PF00462
PF3D7_0709300	PF3D7_0709300.1	MED14	Plasmodium falciparum 3D7	Pf3D7_07_v3:413,560..422,436(-)	mediator of RNA polymerase II transcription subunit 14, putative	protein coding gene	cytostome;food vacuole;nucleolus;symbiont-containing vacuole membrane	N/A	N/A	PF08638
PF3D7_0709400	PF3D7_0709400.1	N/A	Plasmodium falciparum 3D7	Pf3D7_07_v3:422,674..427,278(-)	Cg7 protein	protein coding gene	N/A	N/A	N/A	N/A
PF3D7_0709500	PF3D7_0709500.1	N/A	Plasmodium falciparum 3D7	Pf3D7_07_v3:427,513..429,738(+)	nucleic acid-binding protein, putative	protein coding gene	nucleus	N/A	N/A	N/A
PF3D7_0709600	PF3D7_0709600.1	POP1	Plasmodium falciparum 3D7	Pf3D7_07_v3:429,537..433,997(-)	ribonucleases P/MRP protein subunit POP1, putative	protein coding gene	nucleolar ribonuclease P complex;ribonuclease MRP complex;ribonuclease P complex	ribonuclease MRP activity;ribonuclease P activity	RNA phosphodiester bond hydrolysis, endonucleolytic;tRNA processing	PF06978;PF08170
PF3D7_0709700	PF3D7_0709700.1	PARE	Plasmodium falciparum 3D7	Pf3D7_07_v3:434,748..436,518(-)	prodrug activation and resistance esterase	protein coding gene	cytoplasm;membrane	acylglycerol lipase activity;hydrolase activity;hydrolase activity, acting on ester bonds;lipase activity	monoacylglycerol catabolic process;phospholipid metabolic process;response to xenobiotic stimulus	PF12146
PF3D7_0709800	PF3D7_0709800.1	N/A	Plasmodium falciparum 3D7	Pf3D7_07_v3:437,183..438,431(+)	conserved protein, unknown function	protein coding gene	N/A	N/A	N/A	PF14990
PF3D7_0709900	PF3D7_0709900.1	N/A	Plasmodium falciparum 3D7	Pf3D7_07_v3:438,115..445,951(-)	hydrolase, putative	protein coding gene	N/A	N/A	N/A	PF05990
PF3D7_0710000	PF3D7_0710000.1	N/A	Plasmodium falciparum 3D7	Pf3D7_07_v3:447,209..458,876(-)	conserved Plasmodium protein, unknown function	protein coding gene	preribosome, large subunit precursor	rRNA binding	ribosomal large subunit assembly	N/A
PF3D7_0710100	PF3D7_0710100.1	N/A	Plasmodium falciparum 3D7	Pf3D7_07_v3:459,688..461,959(+)	conserved protein, unknown function	protein coding gene	mitochondrion	N/A	N/A	N/A
PF3D7_0710200	PF3D7_0710200.1	N/A	Plasmodium falciparum 3D7	Pf3D7_07_v3:462,183..472,293(+)	conserved Plasmodium protein, unknown function	protein coding gene	nucleus	N/A	N/A	N/A
PF3D7_0710300	PF3D7_0710300.1	N/A	Plasmodium falciparum 3D7	Pf3D7_07_v3:472,306..474,069(-)	conserved protein, unknown function	protein coding gene	apicoplast	N/A	N/A	N/A
PF3D7_0710400	PF3D7_0710400.1	RAD14	Plasmodium falciparum 3D7	Pf3D7_07_v3:474,350..475,968(+)	DNA repair protein RAD14, putative	protein coding gene	nucleotide-excision repair factor 1 complex	damaged DNA binding	UV-damage excision repair;base-excision repair;nucleotide-excision repair involved in interstrand cross-link repair;nucleotide-excision repair, DNA damage recognition;nucleotide-excision repair, DNA incision	N/A
PF3D7_0710500	PF3D7_0710500.1	N/A	Plasmodium falciparum 3D7	Pf3D7_07_v3:475,796..477,592(-)	conserved protein, unknown function	protein coding gene	apicoplast	N/A	N/A	N/A
PF3D7_0710600	PF3D7_0710600.1	RPL34	Plasmodium falciparum 3D7	Pf3D7_07_v3:478,345..479,945(-)	60S ribosomal protein L34	protein coding gene	cytosolic large ribosomal subunit;nucleus	RNA binding	ribosome biogenesis	PF01199
PF3D7_0710700	PF3D7_0710700.1	N/A	Plasmodium falciparum 3D7	Pf3D7_07_v3:480,710..482,347(-)	conserved Plasmodium protein, unknown function	protein coding gene	nucleus	N/A	N/A	N/A
PF3D7_0710800	PF3D7_0710800.1	USE1	Plasmodium falciparum 3D7	Pf3D7_07_v3:482,351..484,169(-)	protein transport protein USE1, putative	protein coding gene	endoplasmic reticulum	N/A	retrograde vesicle-mediated transport, Golgi to endoplasmic reticulum	N/A
PF3D7_0710900	PF3D7_0710900.1	RPL1	Plasmodium falciparum 3D7	Pf3D7_07_v3:484,253..486,321(+)	50S ribosomal protein L1, mitochondrial, putative	protein coding gene	mitochondrial large ribosomal subunit;mitochondrion;ribosome	structural constituent of ribosome	translation	PF00687
[truncated: 3,827 more rows]
