# Supplementary material for: Complementary crosstalk between palmitoylation and phosphorylation events in MTIP regulates its role during Plasmodium falciparum invasion
Source: Front Cell Infect Microbiol. 2022 Sep 29;12:924424. doi: 10.3389/fcimb.2022.924424 (PMC9556994; doi:10.3389/fcimb.2022.924424)
Supplement: Supplementary Table 2 — Cumulative phosphoproteome of Plasmodium falciparum 3D7. [file Table_2.xlsx]

## Sheet: Phosphorylome
Phosphorylable Proteins	Name	Product						Phosphorylated Proteins	Name	Product
PF3D7_0110700	CAF1C	chromatin assembly factor 1 subunit C, putative						PF3D7_0407800	CINCH	protein CINCH
PF3D7_0110800	N/A	transcription initiation factor TFIIB, putative						PF3D7_0729100	N/A	allantoicase, putative
PF3D7_0113200	N/A	Plasmodium exported protein, unknown function						PF3D7_1467900	N/A	rab GTPase activator, putative
PF3D7_0204700	HT1	hexose transporter						PF3D7_0609000	NUP637	nucleoporin NUP637, putative
PF3D7_0209100	PATPL1	patatin-like phospholipase 1						PF3D7_1230700	SEC13	protein transport protein SEC13
PF3D7_0209600	N/A	transporter, putative						PF3D7_0613300	ROP14	rhoptry protein ROP14
PF3D7_0210200	N/A	conserved Plasmodium protein, unknown function						PF3D7_0109000	PHIL1	photosensitized INA-labeled protein PHIL1
PF3D7_0212900	ATEL1	arginyl-tRNA--protein transferase						PF3D7_1022400	SRSF4	serine/arginine-rich splicing factor 4
PF3D7_0213700	N/A	conserved protein, unknown function						PF3D7_1336400	N/A	RanBPM and CLTH-like protein, putative
PF3D7_0215400	N/A	conserved Plasmodium protein, unknown function						PF3D7_0723300	N/A	conserved protein, unknown function
PF3D7_0219600	RFC1	replication factor C subunit 1						PF3D7_0927200	N/A	zinc finger protein, putative
PF3D7_0307100	RPS12	40S ribosomal protein S12, putative						PF3D7_0615900	N/A	protein phosphatase, putative
PF3D7_0312100	N/A	E3 ubiquitin-protein ligase						PF3D7_1410400	RAP1	rhoptry-associated protein 1
PF3D7_0317400	N/A	DNA replication complex GINS protein, putative						PF3D7_1321500	PDEbeta	3',5'-cyclic nucleotide phosphodiesterase beta
PF3D7_0322400	N/A	regulator of initiation factor 2 (eIF2)						PF3D7_0709000	CRT	chloroquine resistance transporter
PF3D7_0403600	N/A	conserved Plasmodium protein, unknown function						PF3D7_1251200	N/A	coronin
PF3D7_0405400	PRPF8	pre-mRNA-processing-splicing factor 8, putative						PF3D7_0812400	KARalpha	karyopherin alpha
PF3D7_0408200	N/A	conserved Plasmodium protein, unknown function						PF3D7_0803200	N/A	filament assembling protein, putative
PF3D7_0409800	N/A	zinc finger protein, putative						PF3D7_0508000	P38	6-cysteine protein
PF3D7_0410300	PPM1	protein phosphatase PPM1, putative						PF3D7_1003600	IMC1c	inner membrane complex protein 1c, putative
PF3D7_0411900	N/A	DNA polymerase alpha catalytic subunit A						PF3D7_1018600	N/A	tRNA wybutosine-synthesizing protein, putative
PF3D7_0505900	MED11	mediator of RNA polymerase II transcription subunit 11, putative						PF3D7_1462400	N/A	conserved Plasmodium protein, unknown function
PF3D7_0508100	SET9	SET domain protein, putative						PF3D7_0106700	AARP2	small ribosomal subunit assembling AARP2 protein
PF3D7_0508500	ND6	ND6 protein, putative						PF3D7_1348900	N/A	conserved Plasmodium protein, unknown function
PF3D7_0509100	SMC4	structural maintenance of chromosomes protein 4, putative						PF3D7_0618000	N/A	conserved Plasmodium membrane protein, unknown function
PF3D7_0510200	CYP87	peptidyl-prolyl cis-trans isomerase						PF3D7_0906300	N/A	Maf-like protein, putative
PF3D7_0512000	PFD6	prefoldin subunit 6						PF3D7_0609700	KIC6	protein KIC6
PF3D7_0513800	RAB1a	ras-related protein Rab-1A						PF3D7_0422300	N/A	alpha tubulin 2
PF3D7_0515000	CWC2	pre-mRNA-splicing factor CWC2, putative						PF3D7_1026600	N/A	conserved Plasmodium protein, unknown function
PF3D7_0515400	N/A	conserved protein, unknown function						PF3D7_1405700	N/A	RING zinc finger protein, putative
PF3D7_0517400	FACT-L	FACT complex subunit SPT16, putative						PF3D7_0606000	KIC1	protein KIC1
PF3D7_0519600	N/A	zinc finger protein, putative						PF3D7_1409800	CELF2	CUGBP Elav-like family member 2, putative
PF3D7_0521700	DDX1	ATP-dependent RNA helicase DDX1, putative						PF3D7_1235300	NOT4	CCR4-NOT transcription complex subunit 4, putative
PF3D7_0526200	ARFGAP2	ADP-ribosylation factor GTPase-activating protein 2						PF3D7_0714200	N/A	conserved Plasmodium protein, unknown function
PF3D7_0528100	N/A	AP-1/2 complex subunit beta, putative						PF3D7_0727800	N/A	cation transporting ATPase, putative
PF3D7_0602100	MTR4	ATP-dependent RNA helicase MTR4						PF3D7_1116100	N/A	serine esterase, putative
PF3D7_0617200	N/A	BFR1 domain-containing protein, putative						PF3D7_0303200	N/A	lipin, putative
PF3D7_0618700	N/A	trafficking protein particle complex subunit 6A, putative						PF3D7_0532100	ETRAMP5	early transcribed membrane protein 5
PF3D7_0624000	HK	hexokinase						PF3D7_0506900	ROM4	rhomboid protease ROM4
PF3D7_0629700	SET1	SET domain protein, putative						PF3D7_0107500	NCR1	Niemann-Pick type C1-related protein
PF3D7_0704000	N/A	conserved Plasmodium membrane protein, unknown function						PF3D7_1227700	KIC2	protein KIC2
PF3D7_0705100	N/A	conserved Plasmodium protein, unknown function						PF3D7_1308900	DCP2	mRNA-decapping enzyme 2, putative
PF3D7_0706500	N/A	conserved Plasmodium protein, unknown function						PF3D7_0619400	N/A	cell division cycle protein 48 homologue, putative
PF3D7_0711400	SAP18	histone deacetylase complex subunit SAP18, putative						PF3D7_1322200	N/A	TOG domain-containing protein, putative
PF3D7_0714500	N/A	transcription elongation factor s-II, putative						PF3D7_1112400	N/A	nucleic acid binding protein, putative
PF3D7_0714600	N/A	conserved protein, unknown function						PF3D7_0801800	N/A	mannose-6-phosphate isomerase, putative
PF3D7_0717400	N/A	queuine tRNA-ribosyltransferase, putative						PF3D7_0903500	NUP138	nucleoporin NUP138, putative
PF3D7_0723800	N/A	conserved Plasmodium protein, unknown function						PF3D7_0423500	GAPM2	glideosome associated protein with multiple membrane spans 2
PF3D7_0729500	MT-A70	N6-adenosine-methyltransferase MT-A70						PF3D7_0202600	N/A	nucleic acid-binding protein, putative
PF3D7_0730200	N/A	AP-4 complex subunit beta, putative						PF3D7_1319100	N/A	ubiquitin carboxyl-terminal hydrolase MINDY, putative
PF3D7_0806000	N/A	AAA family ATPase, putative						PF3D7_1138000	N/A	conserved Plasmodium protein, unknown function
PF3D7_0807100	PSH3	DNA helicase PSH3						PF3D7_1227200	K1	potassium channel K1
PF3D7_0808300	N/A	ubiquitin regulatory protein, putative						PF3D7_0517400	FACT-L	FACT complex subunit SPT16, putative
PF3D7_0812800	N/A	zinc finger protein, putative						PF3D7_0628100	HECT1	HECT domain-containing protein 1, putative
PF3D7_0813000	KIC7	protein KIC7						PF3D7_1343800	N/A	VPS13 domain-containing protein, putative
PF3D7_0814400	N/A	phospholipase DDHD1, putative						PF3D7_1357500	N/A	DNA helicase, putative
PF3D7_0817600	N/A	conserved protein, unknown function						PF3D7_0918700	N/A	conserved Plasmodium protein, unknown function
PF3D7_0825000	N/A	conserved Plasmodium protein, unknown function						PF3D7_0508100	SET9	SET domain protein, putative
PF3D7_0904800	RPA1	replication protein A1, small fragment						PF3D7_0314700	RNF1	RING finger protein RNF1
PF3D7_0907200	N/A	GTPase-activating protein, putative						PF3D7_1136800	N/A	DnaJ protein, putative
PF3D7_0910100	N/A	exportin-7, putative						PF3D7_0826900	N/A	conserved Plasmodium protein, unknown function
PF3D7_0912500	N/A	SAP domain-containing protein, putative						PF3D7_0914000	N/A	pseudouridylate synthase, putative
PF3D7_0912600	N/A	conserved Plasmodium protein, unknown function						PF3D7_1409900	CDS	cytidine diphosphate-diacylglycerol synthase
PF3D7_0916400	N/A	conserved Plasmodium protein, unknown function						PF3D7_1357400	N/A	conserved Plasmodium protein, unknown function
PF3D7_0916700	HoMu	RNA-binding protein musashi, putative						PF3D7_1229100	MRP2	multidrug resistance-associated protein 2
PF3D7_0917600	PRP43	pre-mRNA-splicing factor ATP-dependent RNA helicase PRP43, putative						PF3D7_1466400	ApiAP2	AP2 domain transcription factor AP2-EXP
PF3D7_0920700	N/A	CRAL/TRIO domain-containing protein, putative						PF3D7_0904900	CuTP	copper-transporting ATPase
PF3D7_0920900	PRP24	U4/U6 snRNA-associated-splicing factor, putative						PF3D7_1110200	PRPF6	pre-mRNA-processing factor 6, putative
PF3D7_0924400	N/A	conserved Plasmodium protein, unknown function						PF3D7_0813000	KIC7	protein KIC7
PF3D7_0931000	N/A	elongation factor Tu, putative						PF3D7_1343300	N/A	CDT1-like protein, putative
PF3D7_1002900	N/A	conserved Plasmodium protein, unknown function						PF3D7_1302500	N/A	AAA domain-containing protein, putative
PF3D7_1006800	GBP2	G-strand-binding protein 2						PF3D7_1362800	N/A	conserved Plasmodium protein, unknown function
PF3D7_1007900	EIF3D	eukaryotic translation initiation factor 3 subunit D, putative						PF3D7_1304500	N/A	small heat shock protein, putative
PF3D7_1017600	N/A	conserved Plasmodium protein, unknown function						PF3D7_0802000	GDH3	glutamate dehydrogenase, putative
PF3D7_1018600	N/A	tRNA wybutosine-synthesizing protein, putative						PF3D7_0715900	CDF	cation diffusion facilitator family protein, putative
PF3D7_1019600	N/A	conserved Plasmodium protein, unknown function						PF3D7_1021800	SEA1	schizont egress antigen-1
PF3D7_1019700	N/A	conserved Plasmodium protein, unknown function						PF3D7_0103200	NT4	nucleoside transporter 4
PF3D7_1022400	SRSF4	serine/arginine-rich splicing factor 4						PF3D7_0613800	ApiAP2	AP2 domain transcription factor, putative
PF3D7_1027800	RPL3	60S ribosomal protein L3						PF3D7_1130400	RPT5	26S protease regulatory subunit 6A, putative
PF3D7_1029400	CDC50C	LEM3/CDC50 family protein, putative						PF3D7_1353200	MAHRP2	membrane associated histidine-rich protein 2
PF3D7_1031400	OTU	OTU-like cysteine protease						PF3D7_1310400	N/A	conserved Plasmodium protein, unknown function
PF3D7_1031800	N/A	conserved protein, unknown function						PF3D7_1249300	PPM4	protein phosphatase PPM4, putative
PF3D7_1034000	SLY1	Sec1 family protein, putative						PF3D7_1329500	N/A	conserved protein, unknown function
PF3D7_1037300	AAC1	ADP,ATP carrier protein 1						PF3D7_1356800	ARK3	serine/threonine protein kinase ARK3, putative
PF3D7_1102500	GEXP02	gametocyte exported protein 2						PF3D7_1308400	N/A	conserved Plasmodium protein, unknown function
PF3D7_1110400	N/A	RNA-binding protein, putative						PF3D7_0319000	ATPase7	P4-type ATPase ATP7, putative
PF3D7_1110900	N/A	ES2 protein, putative						PF3D7_1133200	N/A	conserved Plasmodium protein, unknown function
PF3D7_1111600	N/A	endonuclease/exonuclease/phosphatase family protein, putative						PF3D7_1110400	N/A	RNA-binding protein, putative
PF3D7_1121300	TKL2	tyrosine kinase-like protein						PF3D7_0826100	HEUL	HECT-like E3 ubiquitin ligase, putative
PF3D7_1123900	SNU13	13 kDa ribonucleoprotein-associated protein, putative						PF3D7_1008100	PHD1	PHD finger protein PHD1
PF3D7_1124900	RPL35	60S ribosomal protein L35, putative						PF3D7_0813900	RPS16	40S ribosomal protein S16, putative
PF3D7_1126700	ATG23	conserved Plasmodium protein, unknown function						PF3D7_0413900	USP13	ubiquitin carboxyl-terminal hydrolase 13, putative
PF3D7_1129400	NSUN3	RNA cytosine C(5)-methyltransferase, putative						PF3D7_1366600	SRPR-alpha	signal recognition particle receptor subunit alpha, putative
PF3D7_1138400	GCalpha	guanylyl cyclase alpha						PF3D7_1205900	N/A	conserved protein, unknown function
PF3D7_1142500	RPL28	60S ribosomal protein L28						PF3D7_1346300	ALBA2	DNA/RNA-binding protein Alba 2
PF3D7_1142900	N/A	conserved Plasmodium protein, unknown function						PF3D7_0305500	N/A	protein dopey homolog, putative
PF3D7_1143100	AP2-O	AP2 domain transcription factor AP2-O						PF3D7_1436600	PKG	cGMP-dependent protein kinase
PF3D7_1146200	N/A	conserved Plasmodium protein, unknown function						PF3D7_0719700	RPS10	40S ribosomal protein S10, putative
PF3D7_1204300	EIF5A	eukaryotic translation initiation factor 5A						PF3D7_0705500	N/A	inositol-phosphate phosphatase, putative
PF3D7_1205500	N/A	zinc finger protein, putative						PF3D7_0815800	VPS9	vacuolar protein sorting-associated protein 9, putative
PF3D7_1205600	N/A	tetratricopeptide repeat protein, putative						PF3D7_0825000	N/A	conserved Plasmodium protein, unknown function
PF3D7_1206300	N/A	conserved Plasmodium protein, unknown function						PF3D7_0922100	N/A	ubiquitin-like protein, putative
PF3D7_1211900	ATP4	non-SERCA-type Ca2+ -transporting P-ATPase						PF3D7_0821800	SEC61B	protein transport protein SEC61 subunit beta, putative
PF3D7_1220400	DRN1	debranching enzyme-associated ribonuclease, putative						PF3D7_1126700	ATG23	conserved Plasmodium protein, unknown function
PF3D7_1220900	HP1	heterochromatin protein 1						PF3D7_0919000	NAPS	nucleosome assembly protein
PF3D7_1230800	WTAP	pre-mRNA-splicing regulator WTAP, putative						PF3D7_0817500	HINT1	histidine triad nucleotide-binding protein 1
PF3D7_1238300	CWC22	pre-mRNA-splicing factor CWC22, putative						PF3D7_1202900	HMGB1	high mobility group protein B1
PF3D7_1239200	ApiAP2	AP2 domain transcription factor, putative						PF3D7_0717600	IMC32	inner membrane complex protein, putative
PF3D7_1249300	PPM4	protein phosphatase PPM4, putative						PF3D7_0206000	RAD2	DNA repair protein RAD2, putative
PF3D7_1302100	G27/25	gamete antigen 27/25						PF3D7_1002900	N/A	conserved Plasmodium protein, unknown function
PF3D7_1304500	N/A	small heat shock protein, putative						PF3D7_0308300	PIC4	PhIL1-interacting candidate PIC4
PF3D7_1305900	N/A	conserved Plasmodium protein, unknown function						PF3D7_0219600	RFC1	replication factor C subunit 1
PF3D7_1312900	EIF4G	eukaryotic translation initation factor 4 gamma						PF3D7_1149000	Pf332	antigen 332, DBL-like protein
PF3D7_1316900	N/A	conserved protein, unknown function						PF3D7_1473200	N/A	DnaJ protein, putative
PF3D7_1343000	PMT	phosphoethanolamine N-methyltransferase						PF3D7_1470100	N/A	conserved Plasmodium protein, unknown function
PF3D7_1343400	RAD5	DNA repair protein RAD5, putative						PF3D7_1019100	N/A	conserved Plasmodium protein, unknown function
PF3D7_1348600	N/A	conserved Plasmodium protein, unknown function						PF3D7_1107300	PAIP1	polyadenylate-binding protein-interacting protein 1, putative
PF3D7_1349300	TKL3	tyrosine kinase-like protein						PF3D7_1468100	MORC	MORC family protein
PF3D7_1353400	N/A	Ran-binding protein, putative						PF3D7_0808100	N/A	AP-3 complex subunit delta, putative
PF3D7_1354900	N/A	conserved Plasmodium protein, unknown function						PF3D7_1114900	N/A	filamin domain-containing protein, putative
PF3D7_1366400	RHOP148	rhoptry protein RHOP148						PF3D7_0504000	ATPase3	cation transporting P-ATPase
PF3D7_1407100	NOP1	rRNA 2'-O-methyltransferase fibrillarin, putative						PF3D7_1105100	H2B	histone H2B
PF3D7_1409400	N/A	conserved protein, unknown function						PF3D7_0529800	N/A	conserved Plasmodium protein, unknown function
PF3D7_1418200	N/A	conserved Plasmodium protein, unknown function						PF3D7_1442400	KIC9	protein KIC9
PF3D7_1427600	MIT3	CorA-like Mg2+ transporter protein, putative						PF3D7_1433400	PHD2	PHD finger protein PHD2, putative
PF3D7_1432900	N/A	SF-assemblin, putative						PF3D7_0321600	DDX42	ATP-dependent RNA helicase DDX42, putative
PF3D7_1435500	CLC	clathrin light chain, putative						PF3D7_0726400	N/A	conserved Plasmodium membrane protein, unknown function
PF3D7_1438100	SEC62	translocation protein SEC62, putative						PF3D7_1436200	BCP1	basal complex protein BCP1
PF3D7_1440000	N/A	conserved Plasmodium protein, unknown function						PF3D7_1351000	N/A	phosphatidylinositol transfer protein, putative
PF3D7_1440800	MFS6	major facilitator superfamily domain-containing protein, putative						PF3D7_0830500	TryThrA	sporozoite and liver stage tryptophan-rich protein, putative
PF3D7_1448600	VTI1	SNARE protein, putative						PF3D7_1417700	N/A	conserved protein, unknown function
PF3D7_1461800	N/A	conserved Plasmodium protein, unknown function						PF3D7_1353300	N/A	conserved Plasmodium protein, unknown function
PF3D7_1464000	N/A	YL1 nuclear protein, putative						PF3D7_1441300	N/A	serine/threonine protein kinase, putative
PF3D7_1467600	N/A	conserved Plasmodium protein, unknown function						PF3D7_1334100	N/A	conserved protein, unknown function
PF3D7_1468900	N/A	zinc finger protein, putative						PF3D7_1212900	BDP2	bromodomain protein 2, putative
PF3D7_1474000	N/A	conserved Plasmodium protein, unknown function						PF3D7_1228800	N/A	WD repeat-containing protein, putative
PF3D7_0208200	KRR1	KRR1 small subunit processome component, putative						PF3D7_1340600	DBR1	RNA lariat debranching enzyme, putative
PF3D7_0407800	CINCH	protein CINCH						PF3D7_1208900	PPM11	protein phosphatase PPM11, putative
PF3D7_0506800	TCF25	transcription factor 25, putative						PF3D7_1426100	BTF3	transcription factor BTF3, putative
PF3D7_0614300	MFR1	major facilitator superfamily-related transporter, putative						PF3D7_1426700	PEPC	phosphoenolpyruvate carboxylase
PF3D7_0708400	HSP90	heat shock protein 90						PF3D7_1465100	COG6	conserved oligomeric Golgi complex subunit 6, putative
PF3D7_0715800	DMT1	drug/metabolite transporter DMT1, putative						PF3D7_0307700	N/A	conserved Plasmodium protein, unknown function
PF3D7_1002400	TRA2B	transformer-2 protein homolog beta, putative						PF3D7_1364000	N/A	conserved protein, unknown function
PF3D7_1025900	N/A	conserved protein, unknown function						PF3D7_0623100	NAB2	nuclear polyadenylated RNA-binding protein NAB2, putative
PF3D7_1030000	SPT4	transcription elongation factor SPT4, putative						PF3D7_1359900	N/A	conserved Plasmodium membrane protein, unknown function
PF3D7_1108400	CK2alpha	casein kinase 2, alpha subunit						PF3D7_0513600	N/A	deoxyribodipyrimidine photo-lyase, putative
PF3D7_1114100	ROM1	rhomboid protease ROM1						PF3D7_0932800	CSE1	importin alpha re-exporter, putative
PF3D7_1114700	CLK3	cyclin-dependent-like kinase CLK3						PF3D7_1351700	IMC1f	inner membrane complex protein 1f, putative
PF3D7_1126200	RPS18	40S ribosomal protein S18, putative						PF3D7_1308200	cpsSII	carbamoyl phosphate synthetase
PF3D7_1129900	MFR5	major facilitator superfamily-related transporter, putative						PF3D7_0103400	N/A	zinc-carboxypeptidase, putative
PF3D7_1132200	TCP1	T-complex protein 1 subunit alpha						PF3D7_1352700	AQR	intron-binding protein aquarius, putative
PF3D7_1133300	CDC50B	LEM3/CDC50 family protein, putative						PF3D7_0823800	N/A	DnaJ protein, putative
PF3D7_1149000	Pf332	antigen 332, DBL-like protein						PF3D7_1408200	AP2-G2	AP2 domain transcription factor AP2-G2
PF3D7_1209200	LSM7	U6 snRNA-associated Sm-like protein LSm7, putative						PF3D7_1461100	N/A	conserved Plasmodium protein, unknown function
PF3D7_1221000	SET10	histone-lysine N-methyltransferase, H3 lysine-4 specific						PF3D7_1455300	N/A	conserved protein, unknown function
PF3D7_1304200	MIT2	CorA-like Mg2+ transporter protein, putative						PF3D7_0905400	RhopH3	high molecular weight rhoptry protein 3
PF3D7_1304900	RPB11	DNA-directed RNA polymerase II subunit RPB11, putative						PF3D7_1425800	N/A	conserved Plasmodium protein, unknown function
PF3D7_1306800	N/A	RED-like protein, putative						PF3D7_0824900	N/A	conserved Plasmodium protein, unknown function
PF3D7_1328300	N/A	conserved protein, unknown function						PF3D7_1136600	N/A	conserved Plasmodium protein, unknown function
PF3D7_1340300	N/A	nucleolar complex protein 2, putative						PF3D7_1008500	N/A	protein GPR89, putative
PF3D7_1347200	NT1	nucleoside transporter 1						PF3D7_1358800	RPS15	40S ribosomal protein S15
PF3D7_1429000	N/A	protein archease, putative						PF3D7_1457900	N/A	conserved Plasmodium protein, unknown function
PF3D7_1465900	N/A	40S ribosomal protein S3						PF3D7_1360800	FLN	falcilysin
PF3D7_1473200	N/A	DnaJ protein, putative						PF3D7_1149100	N/A	Plasmodium exported protein, unknown function
PF3D7_1473700	NUP116	nucleoporin NUP116/NSP116, putative						PF3D7_1016000	N/A	conserved Plasmodium protein, unknown function
PF3D7_1474900	CITH	trailer hitch homolog, putative						PF3D7_1140400	N/A	conserved Plasmodium protein, unknown function
PF3D7_1476800	N/A	lysophospholipase, putative						PF3D7_1017600	N/A	conserved Plasmodium protein, unknown function
PF3D7_0220000	LSA3	liver stage antigen 3						PF3D7_1027300	nPrx	peroxiredoxin
PF3D7_0526800	N/A	conserved Plasmodium protein, unknown function						PF3D7_1323700	GAPM1	glideosome associated protein with multiple membrane spans 1
PF3D7_0528400	DHHC7	palmitoyltransferase DHHC7						PF3D7_0105200	N/A	heptatricopeptide repeat and RAP domain-containing protein, putative
PF3D7_0603400	TEX1	trophozoite exported protein 1						PF3D7_1416200	MCA3	metacaspase-3
PF3D7_0607000	N/A	translation initiation factor IF-2, putative						PF3D7_1247500	N/A	serine/threonine protein kinase, putative
PF3D7_0617800	H2A	histone H2A						PF3D7_1030000	SPT4	transcription elongation factor SPT4, putative
PF3D7_0702400	SEMP1	small exported membrane protein 1						PF3D7_0824400	NT2	nucleoside transporter 2
PF3D7_0714000	H2B.Z	histone H2B variant						PF3D7_1002100	PTP5	EMP1-trafficking protein
PF3D7_0821400	N/A	conserved Plasmodium protein, unknown function						PF3D7_1138800	N/A	WD repeat-containing protein, putative
PF3D7_0824400	NT2	nucleoside transporter 2						PF3D7_0106300	ATP6	calcium-transporting ATPase
PF3D7_0825300	N/A	SAYSvFN domain-containing protein, putative						PF3D7_1211300	MCM8	DNA helicase MCM8, putative
PF3D7_1020000	RBM34	RNA-binding protein 34, putative						PF3D7_1339700	N/A	conserved Plasmodium protein, unknown function
PF3D7_1021200	N/A	conserved Plasmodium protein, unknown function						PF3D7_0214100	SEC31	protein transport protein SEC31
PF3D7_1021900	N/A	PHAX domain-containing protein, putative						PF3D7_1473700	NUP116	nucleoporin NUP116/NSP116, putative
PF3D7_1026800	RPS2	40S ribosomal protein S2						PF3D7_0710200	N/A	conserved Plasmodium protein, unknown function
PF3D7_1104100	SYN13	syntaxin, Qa-SNARE family						PF3D7_0922800	N/A	conserved Plasmodium protein, unknown function
PF3D7_1109400	ENP1	essential nuclear protein 1, putative						PF3D7_1013200	N/A	conserved Plasmodium protein, unknown function
PF3D7_1243100	N/A	zinc finger protein, putative						PF3D7_0504800	N/A	conserved Plasmodium protein, unknown function
PF3D7_1417300	ATG4	cysteine protease ATG4, putative						PF3D7_0317300	N/A	conserved Plasmodium protein, unknown function
PF3D7_1446600	CEN2	centrin-2						PF3D7_1138400	GCalpha	guanylyl cyclase alpha
PF3D7_1453000	N/A	conserved Plasmodium protein, unknown function						PF3D7_1472200	HDA1	histone deacetylase, putative
PF3D7_1468700	eIF4A	eukaryotic initiation factor 4A						PF3D7_1237500	N/A	conserved Plasmodium protein, unknown function
PF3D7_0218700	PRP45	pre-mRNA-processing protein 45, putative						PF3D7_1421200	RPS25	40S ribosomal protein S25
PF3D7_0322000	CYP19A	peptidyl-prolyl cis-trans isomerase						PF3D7_1357100	N/A	elongation factor 1-alpha
PF3D7_0516400	PhLP1	phosducin-like protein 1, putative						PF3D7_0317700	N/A	CPSF (cleavage and polyadenylation specific factor), subunit A, putative
PF3D7_0715200	N/A	conserved Plasmodium protein, unknown function						PF3D7_0510100	N/A	KH domain-containing protein, putative
PF3D7_0801800	N/A	mannose-6-phosphate isomerase, putative						PF3D7_1459000	DBP5	ATP-dependent RNA helicase DBP5
PF3D7_0813900	RPS16	40S ribosomal protein S16, putative						PF3D7_0829000	N/A	conserved Plasmodium membrane protein, unknown function
PF3D7_0906600	N/A	zinc finger protein, putative						PF3D7_0918900	gammaGCS	gamma-glutamylcysteine synthetase
PF3D7_0925700	HDAC1	histone deacetylase 1						PF3D7_1121100	N/A	conserved protein, unknown function
PF3D7_1114900	N/A	filamin domain-containing protein, putative						PF3D7_1352800	MON1	vacuolar fusion protein MON1, putative
PF3D7_1140600	N/A	conserved Plasmodium protein, unknown function						PF3D7_0822900	PIC2	PhIL1-interacting candidate PIC2
PF3D7_1208400	N/A	amino acid transporter, putative						PF3D7_1350100	KRS1	lysine--tRNA ligase
PF3D7_1307900	N/A	tripartite motif protein, putative						PF3D7_0935200	VPS33	vacuolar protein sorting-associated protein 33, putative
PF3D7_1313600	N/A	Clu domain-containing protein, putative						PF3D7_1239800	N/A	conserved Plasmodium protein, unknown function
PF3D7_1327500	N/A	conserved protein, unknown function						PF3D7_1205800	HMGB3	high mobility group protein B3, putative
PF3D7_1366300	N/A	conserved Plasmodium protein, unknown function						PF3D7_0316500	NUF2	kinetochore protein NUF2, putative
PF3D7_1436200	BCP1	basal complex protein BCP1						PF3D7_1204300	EIF5A	eukaryotic translation initiation factor 5A
PF3D7_1461400	N/A	MORN repeat protein, putative						PF3D7_0717700	N/A	serine--tRNA ligase, putative
PF3D7_0205900	RPN1	26S proteasome regulatory subunit RPN1, putative						PF3D7_0532400	LyMP	lysine-rich membrane-associated PHISTb protein
PF3D7_0519500	CCR4-1	CCR4 domain-containing protein 1, putative						PF3D7_1223700	VIT	vacuolar iron transporter
PF3D7_0522900	N/A	zinc finger protein, putative						PF3D7_1227300	N/A	conserved Plasmodium protein, unknown function
PF3D7_0903200	RAB7	ras-related protein RAB7						PF3D7_1304200	MIT2	CorA-like Mg2+ transporter protein, putative
PF3D7_1210600	N/A	kelch protein, putative						PF3D7_0403600	N/A	conserved Plasmodium protein, unknown function
PF3D7_1219600	ATP2	phospholipid-transporting ATPase 2						PF3D7_1423300	PP7	serine/threonine protein phosphatase 7
PF3D7_1311900	vapA	V-type proton ATPase catalytic subunit A						PF3D7_0311300	N/A	phosphatidylinositol 3- and 4-kinase, putative
PF3D7_1409800	CELF2	CUGBP Elav-like family member 2, putative						PF3D7_1241500	N/A	conserved Plasmodium protein, unknown function
PF3D7_1441200	N/A	60S ribosomal protein L1, putative						PF3D7_1239000	N/A	HD superfamily phosphohydrolase protein, putative
PF3D7_0107800	MRE11	double-strand break repair protein MRE11						PF3D7_1142100	N/A	conserved Plasmodium protein, unknown function
PF3D7_0109000	PHIL1	photosensitized INA-labeled protein PHIL1						PF3D7_1011400	N/A	proteasome subunit beta type-5
PF3D7_0202000	KAHRP	knob-associated histidine-rich protein						PF3D7_0509800	PI4KB	phosphatidylinositol 4-kinase beta
PF3D7_0207100	N/A	conserved Plasmodium protein, unknown function						PF3D7_0606500	PTB	polypyrimidine tract-binding protein, putative
PF3D7_0209800	UAP56	ATP-dependent RNA helicase UAP56						PF3D7_0309000	YVH1	dual specificity protein phosphatase
PF3D7_0212100	N/A	conserved Plasmodium protein, unknown function						PF3D7_0730500	N/A	conserved Plasmodium protein, unknown function
PF3D7_0212500	N/A	conserved Plasmodium protein, unknown function						PF3D7_1451200	N/A	conserved Plasmodium protein, unknown function
PF3D7_0214300	N/A	conserved Plasmodium protein, unknown function						PF3D7_1014600	ADA2	transcriptional coactivator ADA2
PF3D7_0218500	SNRPD2	small nuclear ribonucleoprotein Sm D2, putative						PF3D7_0802600	ACbeta	adenylyl cyclase beta
PF3D7_0306900	N/A	40S ribosomal protein S23, putative						PF3D7_1442900	ARFGEF	Sec7 domain-containing protein ARFGEF, putative
PF3D7_0311300	N/A	phosphatidylinositol 3- and 4-kinase, putative						PF3D7_1237900	N/A	conserved Plasmodium protein, unknown function
PF3D7_0315600	N/A	zinc finger protein, putative						PF3D7_1027700	CEN3	centrin-3
PF3D7_0416400	HAT1	histone acetyltransferase, putative						PF3D7_1437200	N/A	ribonucleoside-diphosphate reductase large subunit, putative
PF3D7_0418600	N/A	regulator of chromosome condensation, putative						PF3D7_1003000	N/A	guanylate cyclase organizer UGO, putative
PF3D7_0501400	FIRA	interspersed repeat antigen						PF3D7_1420100	N/A	conserved Plasmodium protein, unknown function
PF3D7_0505500	MSH6	DNA mismatch repair protein MSH6, putative						PF3D7_0212400	N/A	conserved Plasmodium membrane protein, unknown function
PF3D7_0508600	N/A	conserved protein, unknown function						PF3D7_1250200	N/A	CSC1-like protein, putative
PF3D7_0513600	N/A	deoxyribodipyrimidine photo-lyase, putative						PF3D7_0522400	N/A	conserved Plasmodium protein, unknown function
PF3D7_0516200	RPS11	40S ribosomal protein S11						PF3D7_0705300	ORC2	origin recognition complex subunit 2
PF3D7_0615800	COG4	conserved oligomeric Golgi complex subunit 4, putative						PF3D7_0807600	N/A	conserved Plasmodium protein, unknown function
PF3D7_0618000	N/A	conserved Plasmodium membrane protein, unknown function						PF3D7_1437400	PANK2	pantothenate kinase 2
PF3D7_0623100	NAB2	nuclear polyadenylated RNA-binding protein NAB2, putative						PF3D7_0924400	N/A	conserved Plasmodium protein, unknown function
PF3D7_0626800	PyrK	pyruvate kinase						PF3D7_0203600	N/A	conserved Plasmodium protein, unknown function
PF3D7_0707200	N/A	conserved Plasmodium protein, unknown function						PF3D7_1030200	CLAMP	claudin-like apicomplexan microneme protein, putative
PF3D7_0708500	N/A	heat shock protein 86 family protein						PF3D7_0110700	CAF1C	chromatin assembly factor 1 subunit C, putative
PF3D7_0709700	PARE	prodrug activation and resistance esterase						PF3D7_1019500	N/A	TMEM94 domain-containing protein, putative
PF3D7_0722600	UTP7	U3 small nucleolar RNA-associated protein 7, putative						PF3D7_1460500	N/A	conserved Plasmodium protein, unknown function
PF3D7_0726600	N/A	conserved Plasmodium protein, unknown function						PF3D7_1464500	N/A	conserved Plasmodium membrane protein, unknown function
PF3D7_0730900	PTP4	EMP1-trafficking protein						PF3D7_0623800	TKL4	tyrosine kinase-like protein, putative
PF3D7_0801700	SENP2	sentrin-specific protease 2, putative						PF3D7_0808300	N/A	ubiquitin regulatory protein, putative
PF3D7_0803100	UTP14	U3 small nucleolar RNA-associated protein 14, putative						PF3D7_0704800	PPM12	protein phosphatase PPM12, putative
PF3D7_0804000	N/A	cactin homolog, putative						PF3D7_1244600	ARFGAP1	ADP-ribosylation factor GTPase-activating protein 1
PF3D7_0810300	PPM5	protein phosphatase PPM5, putative						PF3D7_0723800	N/A	conserved Plasmodium protein, unknown function
PF3D7_0817900	HMGB2	high mobility group protein B2						PF3D7_0910200	N/A	conserved Plasmodium protein, unknown function
PF3D7_0818200	14-3-3I	14-3-3 protein						PF3D7_0208100	N/A	conserved Plasmodium protein, unknown function
PF3D7_0818900	HSP70	heat shock protein 70						PF3D7_1220300	N/A	cell cycle associated protein, putative
PF3D7_0823100	N/A	RWD domain-containing protein, putative						PF3D7_1225700	N/A	VAC14 domain-containing protein, putative
PF3D7_0912000	N/A	conserved Plasmodium protein, unknown function						PF3D7_0905900	SEC27	coatomer subunit beta, putative
PF3D7_0913200	EF-1beta	elongation factor 1-beta						PF3D7_1311800	M1AAP	M1-family alanyl aminopeptidase
PF3D7_0913600	N/A	conserved Plasmodium protein, unknown function						PF3D7_1032700	N/A	conserved Plasmodium protein, unknown function
PF3D7_0914500	N/A	conserved Plasmodium protein, unknown function						PF3D7_0508900	AAP6	protein AAP6
PF3D7_0914700	MFR4	major facilitator superfamily-related transporter, putative						PF3D7_1037500	DYN2	dynamin-like protein
PF3D7_0915400	PFK9	ATP-dependent 6-phosphofructokinase						PF3D7_0209800	UAP56	ATP-dependent RNA helicase UAP56
PF3D7_0917000	MOP	merozoite organizing protein						PF3D7_0417400	N/A	conserved Plasmodium protein, unknown function
PF3D7_1006200	ALBA3	DNA/RNA-binding protein Alba 3						PF3D7_0521000	N/A	conserved Plasmodium protein, unknown function
PF3D7_1007700	AP2-I	AP2 domain transcription factor AP2-I						PF3D7_0614300	MFR1	major facilitator superfamily-related transporter, putative
PF3D7_1017500	ELC	myosin essential light chain ELC						PF3D7_1437300	N/A	conserved Plasmodium protein, unknown function
PF3D7_1019900	ATG8	autophagy-related protein 8						PF3D7_0611600	BTP1	basal complex transmembrane protein 1
PF3D7_1031300	N/A	SAE2 domain-containing protein, putative						PF3D7_0616200	NDC80	kinetochore protein NDC80, putative
PF3D7_1032700	N/A	conserved Plasmodium protein, unknown function						PF3D7_1342900	AP2-HS	AP2 domain transcription factor AP2-HS
PF3D7_1103100	RPP1	60S acidic ribosomal protein P1, putative						PF3D7_0302900	N/A	exportin-1, putative
PF3D7_1105100	H2B	histone H2B						PF3D7_0503200	CDC6	cell division control protein 6, putative
PF3D7_1107300	PAIP1	polyadenylate-binding protein-interacting protein 1, putative						PF3D7_1465200	MED4	mediator of RNA polymerase II transcription subunit 4, putative
PF3D7_1113100	PRL	protein tyrosine phosphatase						PF3D7_0307200	N/A	60S ribosomal protein L7, putative
PF3D7_1124600	EK	ethanolamine kinase						PF3D7_0529400	N/A	conserved Plasmodium protein, unknown function
PF3D7_1125800	N/A	kelch domain-containing protein, putative						PF3D7_1236000	N/A	vesicle transport v-SNARE protein VTI1, putative
PF3D7_1127800	N/A	TFIIS central domain-containing protein, putative						PF3D7_1039000	FIKK10.2	serine/threonine protein kinase, FIKK family
PF3D7_1129300	N/A	conserved Plasmodium protein, unknown function						PF3D7_0705400	MCM7	DNA replication licensing factor MCM7
PF3D7_1136800	N/A	DnaJ protein, putative						PF3D7_0528400	DHHC7	palmitoyltransferase DHHC7
PF3D7_1139300	AP2-G5	AP2 domain transcription factor AP2-G5						PF3D7_1218500	DRPC	dynamin-like protein, putative
PF3D7_1140200	N/A	conserved Plasmodium protein, unknown function						PF3D7_1021900	N/A	PHAX domain-containing protein, putative
PF3D7_1140400	N/A	conserved Plasmodium protein, unknown function						PF3D7_0105700	N/A	asparagine-rich antigen Pfa35-2
PF3D7_1146600	ORP1	oocyst rupture protein 1, putative						PF3D7_1401200	N/A	Plasmodium exported protein, unknown function
PF3D7_1201900	N/A	conserved protein, unknown function						PF3D7_1141300	APR1	apical polar ring protein APR1, putative
PF3D7_1207000	N/A	conserved Plasmodium protein, unknown function						PF3D7_0628300	CEPT	choline/ethanolaminephosphotransferase, putative
PF3D7_1211600	LSD1	lysine-specific histone demethylase 1, putative						PF3D7_0420300	ApiAP2	AP2 domain transcription factor, putative
PF3D7_1212700	EIF3A	eukaryotic translation initiation factor 3 subunit A, putative						PF3D7_1207000	N/A	conserved Plasmodium protein, unknown function
PF3D7_1222400	ApiAP2	AP2 domain transcription factor						PF3D7_1346400	N/A	VPS13 domain-containing protein, putative
PF3D7_1223700	VIT	vacuolar iron transporter						PF3D7_0603400	TEX1	trophozoite exported protein 1
PF3D7_1226300	HAD2	haloacid dehalogenase-like hydrolase, putative						PF3D7_0906600	N/A	zinc finger protein, putative
PF3D7_1227700	KIC2	protein KIC2						PF3D7_1453700	P23	HSP90 co-chaperone p23
PF3D7_1228300	NEK1	NIMA related kinase 1						PF3D7_1415400	N/A	Btz domain-containing protein, putative
PF3D7_1243700	N/A	ubiquitin-conjugating enzyme E2, putative						PF3D7_0921900	N/A	conserved Plasmodium protein, unknown function
PF3D7_1247400	FKBP35	peptidyl-prolyl cis-trans isomerase FKBP35						PF3D7_0418600	N/A	regulator of chromosome condensation, putative
PF3D7_1302500	N/A	AAA domain-containing protein, putative						PF3D7_0629700	SET1	SET domain protein, putative
PF3D7_1308200	cpsSII	carbamoyl phosphate synthetase						PF3D7_1014900	KIC8	protein KIC8
PF3D7_1315500	N/A	conserved protein, unknown function						PF3D7_1340900	PiT	sodium-dependent phosphate transporter
PF3D7_1325400	N/A	CRWN-like protein, putative						PF3D7_0319100	RBX1	E3 ubiquitin-protein ligase RBX1, putative
PF3D7_1328500	N/A	alpha/beta-hydrolase, putative						PF3D7_0501400	FIRA	interspersed repeat antigen
PF3D7_1349600	N/A	conserved Plasmodium protein, unknown function						PF3D7_1015900	ENO	enolase
PF3D7_1356100	N/A	conserved Plasmodium protein, unknown function						PF3D7_1202600	NEMF	nuclear export mediator factor NEMF, putative
PF3D7_1405100	N/A	GTPase-activating protein, putative						PF3D7_1422300	N/A	DnaJ protein, putative
PF3D7_1410200	CTPS	CTP synthase						PF3D7_1318700	AAP4	protein AAP4
PF3D7_1416900	N/A	prefoldin subunit 2, putative						PF3D7_0907300	N/A	prefoldin-like protein, putative
PF3D7_1438400	MCA2	metacaspase-2						PF3D7_0507800	N/A	conserved protein, unknown function
PF3D7_1441100	N/A	conserved Plasmodium protein, unknown function						PF3D7_1234100	BDP5	bromodomain protein 5
PF3D7_1449600	N/A	conserved protein, unknown function						PF3D7_1466100	PPKL	protein phosphatase containing kelch-like domains
PF3D7_1451500	N/A	pre-mRNA-splicing factor CWF18, putative						PF3D7_1344100	N/A	TLD domain-containing protein, putative
PF3D7_1452400	N/A	conserved Plasmodium protein, unknown function						PF3D7_1358900	N/A	GTP-binding protein, putative
PF3D7_1454000	N/A	RNA-binding protein, putative						PF3D7_0202100	LSAP2	liver stage associated protein 2
PF3D7_1457500	VPS4	vacuolar protein sorting-associated protein 4						PF3D7_1025900	N/A	conserved protein, unknown function
PF3D7_1473400	N/A	conserved protein, unknown function						PF3D7_0515400	N/A	conserved protein, unknown function
PF3D7_0110500	BDP3	bromodomain protein 3, putative						PF3D7_1453200	N/A	conserved Plasmodium protein, unknown function
PF3D7_0203100	N/A	protein kinase, putative						PF3D7_1023000	N/A	conserved Plasmodium protein, unknown function
PF3D7_0400400	VAR	erythrocyte membrane protein 1, PfEMP1						PF3D7_0820900	N/A	conserved Plasmodium protein, unknown function
PF3D7_0411800	N/A	conserved Plasmodium protein, unknown function						PF3D7_0209100	PATPL1	patatin-like phospholipase 1
PF3D7_0503400	ADF1	actin-depolymerizing factor 1						PF3D7_0731600	ACS5	acyl-CoA synthetase
PF3D7_0506900	ROM4	rhomboid protease ROM4						PF3D7_0604500	N/A	GYF domain-containing protein, putative
PF3D7_0527000	MCM3	DNA replication licensing factor MCM3, putative						PF3D7_1007000	TMEM147	transmembrane protein 147, putative
PF3D7_0617300	N/A	RNA-binding protein, putative						PF3D7_1474900	CITH	trailer hitch homolog, putative
PF3D7_0715900	CDF	cation diffusion facilitator family protein, putative						PF3D7_1437500	N/A	conserved Plasmodium membrane protein, unknown function
PF3D7_0727400	N/A	proteasome subunit alpha type-5, putative						PF3D7_1308000	N/A	conserved Plasmodium membrane protein, unknown function
PF3D7_0919900	RCC-PIP	regulator of chromosome condensation-PP1-interacting protein						PF3D7_1221000	SET10	histone-lysine N-methyltransferase, H3 lysine-4 specific
PF3D7_1117700	RAN	GTP-binding nuclear protein RAN/TC4						PF3D7_0505100	TRS85	trafficking protein particle complex subunit 8, putative
PF3D7_1135300	N/A	conserved Plasmodium membrane protein, unknown function						PF3D7_1440000	N/A	conserved Plasmodium protein, unknown function
PF3D7_1218400	N/A	triose or hexose phosphate/phosphate translocator, putative						PF3D7_1302000	PTP6	EMP1-trafficking protein
PF3D7_1450000	N/A	serine/threonine protein kinase, putative						PF3D7_0923400	N/A	conserved Plasmodium protein, unknown function
PF3D7_0105800	N/A	cyclin-dependent kinases regulatory subunit, putative						PF3D7_0218500	SNRPD2	small nuclear ribonucleoprotein Sm D2, putative
PF3D7_0111000	N/A	kinesin-8B, putative						PF3D7_1119300	U2AF1	splicing factor U2AF small subunit, putative
PF3D7_0309300	N/A	N2227-like protein, putative						PF3D7_1448300	N/A	conserved protein, unknown function
PF3D7_0516700	N/A	ubiquitin carboxyl-terminal hydrolase 2, putative						PF3D7_1206700	EIF5	eukaryotic translation initiation factor 5, putative
PF3D7_0525200	SMC6	structural maintenance of chromosomes protein 6, putative						PF3D7_1307700	N/A	TOM1-like protein, putative
PF3D7_0807900	TyrRS	tyrosine--tRNA ligase						PF3D7_0702500	N/A	Plasmodium exported protein, unknown function
PF3D7_0821000	N/A	conserved Plasmodium protein, unknown function						PF3D7_0629600	N/A	ribosomal RNA-processing protein 7, putative
PF3D7_0909700	N/A	FHA domain protein, putative						PF3D7_0933200	N/A	calcyclin-binding protein, putative
PF3D7_0924600	N/A	conserved Plasmodium protein, unknown function						PF3D7_0215400	N/A	conserved Plasmodium protein, unknown function
PF3D7_1003800	EFTUD2	U5 small nuclear ribonucleoprotein component, putative						PF3D7_0523000	MDR1	multidrug resistance protein 1
PF3D7_1145200	N/A	serine/threonine protein kinase, putative						PF3D7_1303500	NHE	sodium/hydrogen exchanger
PF3D7_1206700	EIF5	eukaryotic translation initiation factor 5, putative						PF3D7_1312800	AAP2	protein AAP2
PF3D7_1307800	CEP170	centrosomal protein CEP170, putative						PF3D7_1018200	PPP8	serine/threonine protein phosphatase 8, putative
PF3D7_1313100	N/A	conserved Plasmodium protein, unknown function						PF3D7_1129300	N/A	conserved Plasmodium protein, unknown function
PF3D7_1317100	MCM4	DNA replication licensing factor MCM4						PF3D7_0409600	RPA1	replication protein A1, large subunit
PF3D7_1317900	NOC4	nucleolar complex protein 4, putative						PF3D7_0920000	ELO3	elongation of fatty acids protein, putative
PF3D7_1326500	N/A	conserved Plasmodium protein, unknown function						PF3D7_1019000	N/A	eukaryotic translation initiation factor subunit eIF2A, putative
PF3D7_1417600	N/A	ookinete surface and oocyst capsule protein OSCP, putative						PF3D7_0401800	PfD80	Plasmodium exported protein (PHISTb), unknown function
PF3D7_1448300	N/A	conserved protein, unknown function						PF3D7_0728600	N/A	RING zinc finger protein, putative
PF3D7_1451200	N/A	conserved Plasmodium protein, unknown function						PF3D7_1011800	PREBP	PRE-binding protein
PF3D7_1459000	DBP5	ATP-dependent RNA helicase DBP5						PF3D7_0207100	N/A	conserved Plasmodium protein, unknown function
PF3D7_0316300	PPase	inorganic pyrophosphatase						PF3D7_0610200	RBM25	RNA-binding protein 25, putative
PF3D7_0409600	RPA1	replication protein A1, large subunit						PF3D7_1467600	N/A	conserved Plasmodium protein, unknown function
PF3D7_0415400	N/A	coatomer subunit zeta, putative						PF3D7_1345600	N/A	inner membrane complex protein
PF3D7_0525500	N/A	WD repeat-containing protein, putative						PF3D7_0204300	N/A	conserved Plasmodium protein, unknown function
PF3D7_0607600	SAS6	spindle assembly abnormal protein 6, putative						PF3D7_0704400	N/A	phosphoinositide-binding protein, putative
PF3D7_0616900	N/A	conserved Plasmodium protein, unknown function						PF3D7_1004300	N/A	E3 ubiquitin-protein ligase, putative
PF3D7_0826900	N/A	conserved Plasmodium protein, unknown function						PF3D7_1023900	CHD1	chromodomain-helicase-DNA-binding protein 1 homolog, putative
PF3D7_1115200	SET7	histone-lysine N-methyltransferase SET7						PF3D7_0903200	RAB7	ras-related protein RAB7
PF3D7_1206200	EIF3C	eukaryotic translation initiation factor 3 subunit C, putative						PF3D7_0731300	PfG174	Plasmodium exported protein (PHISTb), unknown function
PF3D7_1416200	MCA3	metacaspase-3						PF3D7_0924000	N/A	patatin-like phospholipase, putative
PF3D7_0114000	EPF1	exported protein family 1						PF3D7_0820000	SRCAP	Snf2-related CBP activator, putative
PF3D7_0201900	EMP3	erythrocyte membrane protein 3						PF3D7_0403800	N/A	alpha/beta hydrolase, putative
PF3D7_0321100	N/A	conserved Plasmodium protein, unknown function						PF3D7_1451800	SORTLR	sortilin
PF3D7_0402400	GEXP18	Plasmodium exported protein, unknown function						PF3D7_1362700	N/A	conserved Plasmodium protein, unknown function
PF3D7_0507100	RPL4	60S ribosomal protein L4						PF3D7_1104100	SYN13	syntaxin, Qa-SNARE family
PF3D7_0806300	FLP	ferlin-like protein, putative						PF3D7_1107800	ApiAP2	AP2 domain transcription factor, putative
PF3D7_0807200	N/A	conserved Plasmodium membrane protein, unknown function						PF3D7_1305000	N/A	MCL1 domain-containing protein, putative
PF3D7_0903300	N/A	conserved protein, unknown function						PF3D7_1239200	ApiAP2	AP2 domain transcription factor, putative
PF3D7_0920800	IMPDH	inosine-5'-monophosphate dehydrogenase						PF3D7_1122500	KIC10	protein KIC10
PF3D7_0922700	PRP18	pre-mRNA-splicing factor 18, putative						PF3D7_0210600	CERLI1	protein CERLI1
PF3D7_1015600	HSP60	heat shock protein 60						PF3D7_0715200	N/A	conserved Plasmodium protein, unknown function
PF3D7_1140800	N/A	conserved Plasmodium protein, unknown function						PF3D7_0919900	RCC-PIP	regulator of chromosome condensation-PP1-interacting protein
PF3D7_1147300	N/A	conserved Plasmodium protein, unknown function						PF3D7_0612200	LRR6	leucine-rich repeat protein
PF3D7_1350100	KRS1	lysine--tRNA ligase						PF3D7_1446500	NUP313	nucleoporin NUP313, putative
PF3D7_1437300	N/A	conserved Plasmodium protein, unknown function						PF3D7_0924600	N/A	conserved Plasmodium protein, unknown function
PF3D7_1476300	N/A	Plasmodium exported protein (PHISTb), unknown function						PF3D7_0532300	N/A	Plasmodium exported protein (PHISTb), unknown function
PF3D7_0217500	CDPK1	calcium-dependent protein kinase 1						PF3D7_0927600	N/A	RNA-binding protein, putative
PF3D7_0218100	N/A	conserved protein, unknown function						PF3D7_1359600	N/A	conserved Plasmodium protein, unknown function
PF3D7_0218600	N/A	patatin-like phospholipase, putative						PF3D7_1301700	CBP2	CX3CL1-binding protein 2
PF3D7_0321600	DDX42	ATP-dependent RNA helicase DDX42, putative						PF3D7_1242600	N/A	protein farnesyltransferase subunit alpha
PF3D7_0416000	N/A	RNA-binding protein, putative						PF3D7_1027800	RPL3	60S ribosomal protein L3
PF3D7_0526500	N/A	conserved Plasmodium protein, unknown function						PF3D7_0415300	CRK3	cdc2-related protein kinase 3
PF3D7_0531100	N/A	conserved Plasmodium protein, unknown function						PF3D7_0804900	N/A	GTPase-activating protein, putative
PF3D7_0604300	N/A	conserved Plasmodium protein, unknown function						PF3D7_0914400	KIC3	protein KIC3
PF3D7_0605300	ARK1	serine/threonine protein kinase ARK1						PF3D7_0505500	MSH6	DNA mismatch repair protein MSH6, putative
PF3D7_0611800	N/A	conserved Plasmodium protein, unknown function						PF3D7_1139300	AP2-G5	AP2 domain transcription factor AP2-G5
PF3D7_0614700	N/A	F-box protein FBXO6, putative						PF3D7_1127800	N/A	TFIIS central domain-containing protein, putative
PF3D7_0614900	N/A	conserved Plasmodium membrane protein, unknown function						PF3D7_1353800	N/A	proteasome subunit alpha type-4, putative
PF3D7_0619700	N/A	F-box protein FBXO1, putative						PF3D7_0611400	SWIB	SWI/SNF-related matrix-associated actin-dependent regulator of chromatin
PF3D7_0621900	SRP68	signal recognition particle subunit SRP68, putative						PF3D7_0728800	N/A	conserved Plasmodium protein, unknown function
PF3D7_0627700	N/A	transportin						PF3D7_1419600	N/A	conserved Plasmodium protein, unknown function
PF3D7_0709300	MED14	mediator of RNA polymerase II transcription subunit 14, putative						PF3D7_1311900	vapA	V-type proton ATPase catalytic subunit A
PF3D7_0717300	N/A	transcription initiation factor IIE subunit alpha, putative						PF3D7_0617200	N/A	BFR1 domain-containing protein, putative
PF3D7_0717600	IMC32	inner membrane complex protein, putative						PF3D7_1305300	GCN1	translational activator GCN1, putative
PF3D7_0810000	N/A	acyl-CoA binding protein, putative						PF3D7_1365800	N/A	conserved Plasmodium protein, unknown function
PF3D7_0933900	N/A	conserved Plasmodium protein, unknown function						PF3D7_0704100	BTP2	basal complex transmembrane protein 2
PF3D7_0935900	REX1	ring-exported protein 1						PF3D7_1456500	N/A	STAG domain-containing protein, putative
PF3D7_1003400	N/A	conserved Plasmodium protein, unknown function						PF3D7_1248700	N/A	conserved protein, unknown function
PF3D7_1003600	IMC1c	inner membrane complex protein 1c, putative						PF3D7_0912500	N/A	SAP domain-containing protein, putative
PF3D7_1005500	UPF1	regulator of nonsense transcripts 1, putative						PF3D7_0626800	PyrK	pyruvate kinase
PF3D7_1007200	N/A	rho GTPase-activating protein, putative						PF3D7_0217600	N/A	conserved Plasmodium protein, unknown function
PF3D7_1013500	PI-PLC	phosphoinositide-specific phospholipase C						PF3D7_0630300	N/A	DNA polymerase epsilon catalytic subunit A, putative
PF3D7_1016300	GBP130	GBP130 protein						PF3D7_1241200	N/A	conserved Plasmodium protein, unknown function
PF3D7_1033500	WDR70	WD repeat-containing protein 70, putative						PF3D7_1026000	N/A	conserved Plasmodium protein, unknown function
PF3D7_1037600	XPB	TFIIH basal transcription factor complex helicase XPB subunit, putative						PF3D7_0511500	N/A	RNA pseudouridylate synthase, putative
PF3D7_1103700	CK2beta1	casein kinase II beta chain						PF3D7_0812500	N/A	RNA-binding protein, putative
PF3D7_1104300	N/A	conserved Plasmodium protein, unknown function						PF3D7_0818000	SNRNP27	U4/U6.U5 small nuclear ribonucleoprotein, putative
PF3D7_1128000	N/A	conserved Plasmodium protein, unknown function						PF3D7_1445400	CLK1	protein serine/threonine kinase-1
PF3D7_1132000	N/A	ubiquitin-like protein, putative						PF3D7_1326700	N/A	conserved Apicomplexan protein, unknown function
PF3D7_1136000	N/A	conserved Plasmodium protein, unknown function						PF3D7_1201000	N/A	Plasmodium exported protein (PHISTb), unknown function
PF3D7_1138500	PPM2	protein phosphatase PPM2						PF3D7_0911400	N/A	conserved Plasmodium protein, unknown function
PF3D7_1144600	TFG2	transcription initiation factor IIF subunit beta, putative						PF3D7_0804000	N/A	cactin homolog, putative
PF3D7_1147600	N/A	conserved Plasmodium protein, unknown function						PF3D7_0420000	N/A	zinc finger protein, putative
PF3D7_1201500	N/A	GPN-loop GTPase, putative						PF3D7_0716000	N/A	RNA-binding protein, putative
PF3D7_1207400	N/A	conserved Plasmodium protein, unknown function						PF3D7_1344900	N/A	conserved Plasmodium protein, unknown function
PF3D7_1213200	MED18	mediator of RNA polymerase II transcription subunit 18, putative						PF3D7_1307900	N/A	tripartite motif protein, putative
PF3D7_1223200	N/A	nucleus export protein BRR6, putative						PF3D7_1233600	AARP1	asparagine and aspartate rich protein 1
PF3D7_1235500	MT-A70.2	N6-adenosine-methyltransferase, putative						PF3D7_1346500	N/A	conserved Plasmodium protein, unknown function
PF3D7_1238500	N/A	conserved Plasmodium protein, unknown function						PF3D7_0525500	N/A	WD repeat-containing protein, putative
PF3D7_1239800	N/A	conserved Plasmodium protein, unknown function						PF3D7_1224000	GCH1	GTP cyclohydrolase 1
PF3D7_1248200	RBM22	pre-mRNA-splicing factor RBM22, putative						PF3D7_1433500	TOP2	DNA topoisomerase 2
PF3D7_1308000	N/A	conserved Plasmodium membrane protein, unknown function						PF3D7_0517700	EIF3B	eukaryotic translation initiation factor 3 subunit B, putative
PF3D7_1314700	N/A	pinin/SDK/MemA domain-containing protein, putative						PF3D7_1031400	OTU	OTU-like cysteine protease
PF3D7_1315300	N/A	conserved protein, unknown function						PF3D7_0615400	N/A	ribonuclease, putative
PF3D7_1319000	N/A	conserved Plasmodium protein, unknown function						PF3D7_1345400	N/A	conserved Plasmodium protein, unknown function
PF3D7_1323800	VPS52	vacuolar protein sorting-associated protein 52, putative						PF3D7_0605100	KH1	KH domain-containing protein, putative
PF3D7_1330000	N/A	PITH domain-containing protein, putative						PF3D7_1421000	DIX	DIX domain-containing protein, putative
PF3D7_1333600	UTP4	U3 small nucleolar RNA-associated protein 4, putative						PF3D7_1476300	N/A	Plasmodium exported protein (PHISTb), unknown function
PF3D7_1337900	N/A	conserved Plasmodium protein, unknown function						PF3D7_0730300	ApiAP2	AP2 domain transcription factor AP2-L, putative
PF3D7_1339700	N/A	conserved Plasmodium protein, unknown function						PF3D7_1004400	N/A	RNA-binding protein, putative
PF3D7_1341500	ISC1	inner membrane complex suture component, putative						PF3D7_1015100	N/A	CWC16 domain-containing protein, putative
PF3D7_1346300	ALBA2	DNA/RNA-binding protein Alba 2						PF3D7_0806800	N/A	V-type proton ATPase subunit a, putative
PF3D7_1407200	N/A	conserved Plasmodium protein, unknown function						PF3D7_0305200	N/A	GRIP domain-containing protein, putative
PF3D7_1408000	PMII	plasmepsin II						PF3D7_1437000	N/A	N-acetyltransferase, GNAT family, putative
PF3D7_1408600	N/A	40S ribosomal protein S8e, putative						PF3D7_0311100	N/A	pre-mRNA splicing factor, putative
PF3D7_1441500	N/A	conserved Plasmodium protein, unknown function						PF3D7_0318200	RPB1	DNA-directed RNA polymerase II subunit RPB1
PF3D7_1443000	SRPK2	serine/threonine protein kinase						PF3D7_0926100	N/A	protein kinase, putative
PF3D7_1453200	N/A	conserved Plasmodium protein, unknown function						PF3D7_1408700	N/A	conserved protein, unknown function
PF3D7_1461300	N/A	40S ribosomal protein S28e, putative						PF3D7_1343000	PMT	phosphoethanolamine N-methyltransferase
PF3D7_1461600	SF3B2	splicing factor 3B subunit 2, putative						PF3D7_1464000	N/A	YL1 nuclear protein, putative
PF3D7_0405700	N/A	lysine decarboxylase, putative						PF3D7_0321800	N/A	WD repeat-containing protein, putative
PF3D7_0619300	N/A	conserved Plasmodium protein, unknown function						PF3D7_1360900	N/A	RNA-binding protein, putative
PF3D7_0629400	PABP3	polyadenylate-binding protein 3, putative						PF3D7_1435600	N/A	conserved Plasmodium protein, unknown function
PF3D7_0920400	N/A	conserved Plasmodium protein, unknown function						PF3D7_1209300	TRZ	telomere repeat-binding zinc finger protein
PF3D7_1004400	N/A	RNA-binding protein, putative						PF3D7_1458000	FP1	cysteine proteinase falcipain 1
PF3D7_1106800	pTKL	pseudo-tyrosine kinase-like protein						PF3D7_1238600	NSM	sphingomyelin phosphodiesterase
PF3D7_1110200	PRPF6	pre-mRNA-processing factor 6, putative						PF3D7_1450100	SRP54	signal recognition particle subunit SRP54
PF3D7_1208100	N/A	conserved Plasmodium protein, unknown function						PF3D7_0708400	HSP90	heat shock protein 90
PF3D7_1220300	N/A	cell cycle associated protein, putative						PF3D7_1329100	MyoF	myosin F, putative
PF3D7_1248500	N/A	bax inhibitor 1, putative						PF3D7_1134300	EMMA1	erythrocyte membrane and merozoite antigen EMMA1
PF3D7_1326700	N/A	conserved Apicomplexan protein, unknown function						PF3D7_1115800	N/A	conserved Plasmodium protein, unknown function
PF3D7_0411100	MED8	mediator of RNA polymerase II transcription subunit 8, putative						PF3D7_0602600	N/A	SAC3 domain-containing protein, putative
PF3D7_0604500	N/A	GYF domain-containing protein, putative						PF3D7_0930500	DGK1	diacylglycerol kinase, putative
PF3D7_0610400	H3	histone H3						PF3D7_0729300	NMD3	60S ribosomal export protein NMD3, putative
PF3D7_0617900	H3.3	histone H3 variant						PF3D7_1447800	N/A	calponin homology domain-containing protein, putative
PF3D7_0707600	MED10	mediator of RNA polymerase II transcription subunit 10, putative						PF3D7_0812100	N/A	proteasome activator complex subunit 4, putative
PF3D7_0719500	CDC50A	LEM3/CDC50 family protein, putative						PF3D7_1205100	SEPSECS	O-phosphoseryl-tRNA(Sec) selenium transferase, putative
PF3D7_0910200	N/A	conserved Plasmodium protein, unknown function						PF3D7_0212500	N/A	conserved Plasmodium protein, unknown function
PF3D7_1145100	SEC21	coatomer subunit gamma, putative						PF3D7_1021700	N/A	VPS13 domain-containing protein, putative
PF3D7_1202900	HMGB1	high mobility group protein B1						PF3D7_0928300	N/A	conserved Plasmodium protein, unknown function
PF3D7_1205100	SEPSECS	O-phosphoseryl-tRNA(Sec) selenium transferase, putative						PF3D7_1312100	N/A	GYF domain-containing protein, putative
PF3D7_1234900	N/A	CHCH domain-containing protein, putative						PF3D7_0911100	N/A	START domain-containing protein, putative
PF3D7_1235100	N/A	conserved protein, unknown function						PF3D7_1423700	N/A	conserved Plasmodium protein, unknown function
PF3D7_1336200	N/A	conserved Plasmodium protein, unknown function						PF3D7_0813400	N/A	conserved protein, unknown function
PF3D7_1337800	CDPK5	calcium-dependent protein kinase 5						PF3D7_1008000	HDA2	histone deacetylase 2
PF3D7_1352700	AQR	intron-binding protein aquarius, putative						PF3D7_1320700	N/A	conserved protein, unknown function
PF3D7_1352800	MON1	vacuolar fusion protein MON1, putative						PF3D7_0617800	H2A	histone H2A
PF3D7_1430800	PIP3	PhIL1 interacting protein PIP3						PF3D7_1227600	SPC24	kinetochore protein SPC24, putative
PF3D7_1460100	FCP	FYVE and coiled-coil domain-containing protein						PF3D7_1418900	DBP4	ATP-dependent RNA helicase DBP4, putative
PF3D7_1471200	SulP	inorganic anion exchanger, inorganic anion antiporter						PF3D7_1304100	LigI	DNA ligase I
PF3D7_0504800	N/A	conserved Plasmodium protein, unknown function						PF3D7_0905100	NUP221	nucleoporin NUP221, putative
PF3D7_0704100	BTP2	basal complex transmembrane protein 2						PF3D7_1343700	Kelch13	kelch protein K13
PF3D7_0707500	N/A	conserved Plasmodium protein, unknown function						PF3D7_0907200	N/A	GTPase-activating protein, putative
PF3D7_0803400	RAD54	DNA repair and recombination protein RAD54, putative						PF3D7_1458500	SAS4	spindle assembly abnormal protein 4, putative
PF3D7_1003000	N/A	guanylate cyclase organizer UGO, putative						PF3D7_0610400	H3	histone H3
PF3D7_1126500	N/A	WD repeat-containing protein, putative						PF3D7_0416200	N/A	PRKR-interacting protein 1, putative
PF3D7_1131500	N/A	conserved Plasmodium protein, unknown function						PF3D7_1203400	MFS4	major facilitator superfamily domain-containing protein, putative
PF3D7_1233900	SENP1	sentrin-specific protease 1						PF3D7_1462800	GAPDH	glyceraldehyde-3-phosphate dehydrogenase
PF3D7_1334700	MSRP7	MSP7-like protein						PF3D7_0624600	ISWI	ISWI chromatin-remodeling complex ATPase
PF3D7_1351400	N/A	60S ribosomal protein L17, putative						PF3D7_1440100	N/A	cohesin complex subunit, putative
PF3D7_1456000	AP2-HC	AP2 domain transcription factor AP2-HC						PF3D7_1417200	NOT1	CCR4-NOT transcription complex subunit NOT1, putative
PF3D7_0108300	ARP	conserved Plasmodium protein, unknown function						PF3D7_1014300	N/A	SPRY domain-containing protein, putative
PF3D7_0112200	MRP1	multidrug resistance-associated protein 1						PF3D7_1403100	CAPD2	condensin complex subunit 1, putative
PF3D7_0203000	ROPE	repetitive organellar protein, putative						PF3D7_1138700	KIC5	protein KIC5
PF3D7_0302100	SRPK1	serine/threonine protein kinase						PF3D7_1405800	BOP1	ribosome biogenesis protein BOP1, putative
PF3D7_0308700	N/A	conserved protein, unknown function						PF3D7_0402400	GEXP18	Plasmodium exported protein, unknown function
PF3D7_0416300	MCM9	DNA helicase MCM9, putative						PF3D7_0906100	VPS46	vacuolar protein sorting-associated protein 46, putative
PF3D7_0518600	WDR26	WD repeat-containing protein 26, putative						PF3D7_1446400	pdhB	pyruvate dehydrogenase E1 component subunit beta
PF3D7_0532400	LyMP	lysine-rich membrane-associated PHISTb protein						PF3D7_1124100	BDCP	BEACH domain-containing protein, putative
PF3D7_0815600	EIF3G	eukaryotic translation initiation factor 3 subunit G, putative						PF3D7_0317200	CRK4	cdc2-related protein kinase 4
PF3D7_0823200	N/A	RNA-binding protein, putative						PF3D7_1115200	SET7	histone-lysine N-methyltransferase SET7
PF3D7_0831000	GEXP09	Plasmodium exported protein (PHISTb), unknown function						PF3D7_1140200	N/A	conserved Plasmodium protein, unknown function
PF3D7_1018200	PPP8	serine/threonine protein phosphatase 8, putative						PF3D7_1208400	N/A	amino acid transporter, putative
PF3D7_1104900	N/A	calcium/calmodulin-dependent protein kinase, putative						PF3D7_0705100	N/A	conserved Plasmodium protein, unknown function
PF3D7_1121100	N/A	conserved protein, unknown function						PF3D7_0507100	RPL4	60S ribosomal protein L4
PF3D7_1124100	BDCP	BEACH domain-containing protein, putative						PF3D7_1303200	VAMP8	SNARE protein, putative
PF3D7_1124400	LSM1	U6 snRNA-associated Sm-like protein LSm1, putative						PF3D7_0526200	ARFGAP2	ADP-ribosylation factor GTPase-activating protein 2
PF3D7_1133200	N/A	conserved Plasmodium protein, unknown function						PF3D7_1207100	N/A	pre-rRNA-processing protein ESF1, putative
PF3D7_1217500	N/A	conserved Plasmodium protein, unknown function						PF3D7_0920700	N/A	CRAL/TRIO domain-containing protein, putative
PF3D7_1237000	UBA2	SUMO-activating enzyme subunit 2						PF3D7_1008800	NOP5	nucleolar protein 5, putative
PF3D7_1339900	ABCB5	ABC transporter B family member 5, putative						PF3D7_1335100	MSP7	merozoite surface protein 7
PF3D7_1346400	N/A	VPS13 domain-containing protein, putative						PF3D7_1321700	SF1	splicing factor 1
PF3D7_1366500	NDK	nucleoside diphosphate kinase						PF3D7_1134800	N/A	coatomer subunit delta
PF3D7_1367500	N/A	NADH-cytochrome b5 reductase, putative						PF3D7_0108300	ARP	conserved Plasmodium protein, unknown function
PF3D7_1401200	N/A	Plasmodium exported protein, unknown function						PF3D7_0618900	GPI1	phosphatidylinositol N-acetylglucosaminyltransferase subunit GPI1
PF3D7_1416600	N/A	conserved Plasmodium protein, unknown function						PF3D7_0727400	N/A	proteasome subunit alpha type-5, putative
PF3D7_1419400	N/A	conserved Plasmodium membrane protein, unknown function						PF3D7_0719900	N/A	conserved Plasmodium membrane protein, unknown function
PF3D7_1438900	Trx-Px1	thioredoxin peroxidase 1						PF3D7_0811300	CAF1	CCR4-associated factor 1
PF3D7_0218200	N/A	SUZ domain-containing protein, putative						PF3D7_1126800	SR-MG	alternative splicing factor SR-MG, putative
PF3D7_0301700	N/A	Plasmodium exported protein, unknown function						PF3D7_0930300	MSP1	merozoite surface protein 1
PF3D7_0302900	N/A	exportin-1, putative						PF3D7_0627100	N/A	ankyrin-repeat protein, putative
PF3D7_0305300	N/A	transporter, putative						PF3D7_1367100	SNP1	U1 small nuclear ribonucleoprotein 70 kDa homolog, putative
PF3D7_0305500	N/A	protein dopey homolog, putative						PF3D7_1307200	N/A	DnaJ protein, putative
PF3D7_0307200	N/A	60S ribosomal protein L7, putative						PF3D7_1328000	N/A	conserved Plasmodium protein, unknown function
PF3D7_0403200	N/A	pre-mRNA splicing factor, putative						PF3D7_0723400	N/A	conserved Plasmodium protein, unknown function
PF3D7_0406900	N/A	conserved Plasmodium protein, unknown function						PF3D7_1439800	N/A	vesicle-associated membrane protein, putative
PF3D7_0410900	N/A	conserved Plasmodium protein, unknown function						PF3D7_0630600	N/A	deubiquitinating enzyme MINDY, putative
PF3D7_0422500	BRR2	pre-mRNA-splicing helicase BRR2, putative						PF3D7_1212700	EIF3A	eukaryotic translation initiation factor 3 subunit A, putative
PF3D7_0517700	EIF3B	eukaryotic translation initiation factor 3 subunit B, putative						PF3D7_1316100	IPK2	inositol polyphosphate kinase, putative
PF3D7_0521900	N/A	conserved Plasmodium protein, unknown function						PF3D7_0914900	N/A	BSD-domain protein, putative
PF3D7_0527900	DDX41	ATP-dependent RNA helicase DDX41, putative						PF3D7_1248900	RPT6	26S protease regulatory subunit 8, putative
PF3D7_0602900	N/A	conserved Plasmodium protein, unknown function						PF3D7_1407100	NOP1	rRNA 2'-O-methyltransferase fibrillarin, putative
PF3D7_0606500	PTB	polypyrimidine tract-binding protein, putative						PF3D7_0823100	N/A	RWD domain-containing protein, putative
PF3D7_0624200	N/A	SURP domain-containing protein, putative						PF3D7_1148000	N/A	serine/threonine protein kinase, putative
PF3D7_0709000	CRT	chloroquine resistance transporter						PF3D7_1116500	FT2	folate transporter 2
PF3D7_0723400	N/A	conserved Plasmodium protein, unknown function						PF3D7_0709400	N/A	Cg7 protein
PF3D7_0905800	N/A	conserved Plasmodium protein, unknown function						PF3D7_1321300	N/A	conserved Plasmodium membrane protein, unknown function
PF3D7_0908600	N/A	ribosomal RNA methyltransferase, putative						PF3D7_1356100	N/A	conserved Plasmodium protein, unknown function
PF3D7_0921900	N/A	conserved Plasmodium protein, unknown function						PF3D7_0322900	RPS3A	40S ribosomal protein S3A, putative
PF3D7_0923400	N/A	conserved Plasmodium protein, unknown function						PF3D7_1405100	N/A	GTPase-activating protein, putative
PF3D7_0926800	N/A	conserved Plasmodium protein, unknown function						PF3D7_0619000	N/A	FPL domain-containing protein, putative
PF3D7_1011200	BET1	BET1-like protein, putative						PF3D7_0821400	N/A	conserved Plasmodium protein, unknown function
PF3D7_1011400	N/A	proteasome subunit beta type-5						PF3D7_1413700	N/A	DET1 domain-containing protein, putative
PF3D7_1013900	N/A	translation initiation factor eIF-2B subunit delta, putative						PF3D7_1410300	N/A	WD repeat-containing protein, putative
PF3D7_1014400	MRK	MO15-related protein kinase						PF3D7_0913200	EF-1beta	elongation factor 1-beta
PF3D7_1021100	N/A	conserved Plasmodium protein, unknown function						PF3D7_1357000	N/A	elongation factor 1-alpha
PF3D7_1023900	CHD1	chromodomain-helicase-DNA-binding protein 1 homolog, putative						PF3D7_1130700	SMC1	structural maintenance of chromosomes protein 1, putative
PF3D7_1122900	N/A	dynein heavy chain, putative						PF3D7_0912800	GCD10	tRNA (adenine(58)-N(1))-methyltransferase non-catalytic subunit TRM6, putative
PF3D7_1132600	PRP38A	pre-mRNA-splicing factor 38A, putative						PF3D7_1206200	EIF3C	eukaryotic translation initiation factor 3 subunit C, putative
PF3D7_1141800	N/A	EELM2 domain-containing protein, putative						PF3D7_1033700	BDP1	bromodomain protein 1
PF3D7_1225800	UBA1	ubiquitin-activating enzyme E1						PF3D7_0707700	N/A	E3 ubiquitin-protein ligase, putative
PF3D7_1231600	PRP2	pre-mRNA-splicing factor ATP-dependent RNA helicase PRP2, putative						PF3D7_1317800	RPS19	40S ribosomal protein S19
PF3D7_1233200	N/A	conserved Plasmodium protein, unknown function						PF3D7_0507600	CAF40	protein CAF40, putative
PF3D7_1238900	PK2	protein kinase 2						PF3D7_0419800	N/A	60S ribosomal protein L7ae/L30e, putative
PF3D7_1245100	KLP8	kinesin-13, putative						PF3D7_1221300	N/A	conserved Plasmodium protein, unknown function
PF3D7_1305000	N/A	MCL1 domain-containing protein, putative						PF3D7_1369500	N/A	conserved protein, unknown function
PF3D7_1317000	USP39	U4/U6.U5 tri-snRNP-associated protein 2, putative						PF3D7_1102500	GEXP02	gametocyte exported protein 2
PF3D7_1321200	N/A	zinc finger protein, putative						PF3D7_1408400	FANCJ	FANCJ-like helicase, putative
PF3D7_1321700	SF1	splicing factor 1						PF3D7_1441600	N/A	acid cluster protein 33 homologue, putative
PF3D7_1331500	N/A	conserved Plasmodium protein, unknown function						PF3D7_1402300	RPN6	26S proteasome regulatory subunit RPN6
PF3D7_1342400	CK2beta2	casein kinase II beta chain						PF3D7_1201900	N/A	conserved protein, unknown function
PF3D7_1342900	AP2-HS	AP2 domain transcription factor AP2-HS						PF3D7_0220600	N/A	Plasmodium exported protein (hyp9), unknown function
PF3D7_1348900	N/A	conserved Plasmodium protein, unknown function						PF3D7_0813300	N/A	NPL domain-containing protein, putative
PF3D7_1349200	N/A	glutamate--tRNA ligase, putative						PF3D7_1025500	N/A	conserved Plasmodium protein, unknown function
PF3D7_1352400	N/A	conserved Plasmodium protein, unknown function						PF3D7_1105300	N/A	conserved Plasmodium protein, unknown function
PF3D7_1353800	N/A	proteasome subunit alpha type-4, putative						PF3D7_1219100	CHC	clathrin heavy chain, putative
PF3D7_1359600	N/A	conserved Plasmodium protein, unknown function						PF3D7_1325400	N/A	CRWN-like protein, putative
PF3D7_1369200	N/A	conserved Plasmodium protein, unknown function						PF3D7_1323200	N/A	V-type proton ATPase subunit G, putative
PF3D7_1423700	N/A	conserved Plasmodium protein, unknown function						PF3D7_1412600	DHS	deoxyhypusine synthase
PF3D7_1426000	RPL21	60S ribosomal protein L21						PF3D7_1346100	SEC61A	protein transport protein SEC61 subunit alpha
PF3D7_1446700	N/A	conserved Plasmodium protein, unknown function						PF3D7_1325900	N/A	conserved Plasmodium protein, unknown function
PF3D7_1447200	N/A	conserved protein, unknown function						PF3D7_1409400	N/A	conserved protein, unknown function
PF3D7_0316800	N/A	40S ribosomal protein S15A, putative						PF3D7_0408500	FEN1	flap endonuclease 1
PF3D7_0516500	MFS1	major facilitator superfamily domain-containing protein, putative						PF3D7_1366700	N/A	conserved Plasmodium protein, unknown function
PF3D7_0714200	N/A	conserved Plasmodium protein, unknown function						PF3D7_0716800	EIF3I	eukaryotic translation initiation factor 3 subunit I, putative
PF3D7_1033900	N/A	ubiquitin-conjugating enzyme E2, putative						PF3D7_0912900	RPN8	26S proteasome regulatory subunit RPN8, putative
PF3D7_1116500	FT2	folate transporter 2						PF3D7_1228400	N/A	conserved Plasmodium protein, unknown function
PF3D7_1224000	GCH1	GTP cyclohydrolase 1						PF3D7_0208400	N/A	conserved Plasmodium protein, unknown function
PF3D7_1407500	TRM112	multifunctional methyltransferase subunit TRM112, putative						PF3D7_0515700	GAP40	glideosome-associated protein 40, putative
PF3D7_1426100	BTF3	transcription factor BTF3, putative						PF3D7_0707300	RAMA	rhoptry-associated membrane antigen
PF3D7_0317500	EG5	kinesin-5						PF3D7_1433100	N/A	HID1 domain-containing protein, putative
PF3D7_0323000	TMA7	translation machinery-associated protein 7, putative						PF3D7_0810300	PPM5	protein phosphatase PPM5, putative
PF3D7_0619400	N/A	cell division cycle protein 48 homologue, putative						PF3D7_1314100	N/A	conserved Plasmodium protein, unknown function
PF3D7_1016000	N/A	conserved Plasmodium protein, unknown function						PF3D7_0804500	N/A	conserved Plasmodium membrane protein, unknown function
PF3D7_1109900	RPL36	60S ribosomal protein L36						PF3D7_1002400	TRA2B	transformer-2 protein homolog beta, putative
PF3D7_1112600	N/A	ATPase, putative						PF3D7_0402000	N/A	Plasmodium exported protein (PHISTa), unknown function
PF3D7_1123100	CDPK7	calcium-dependent protein kinase 7						PF3D7_1029600	ADA	adenosine deaminase
PF3D7_1311500	RPT1	26S protease regulatory subunit 7, putative						PF3D7_1220900	HP1	heterochromatin protein 1
PF3D7_1344100	N/A	TLD domain-containing protein, putative						PF3D7_1328200	N/A	conserved Plasmodium protein, unknown function
PF3D7_0308100	N/A	zinc finger protein, putative						PF3D7_0621900	SRP68	signal recognition particle subunit SRP68, putative
PF3D7_0412200	N/A	conserved Plasmodium protein, unknown function						PF3D7_0722200	RALP1	rhoptry-associated leucine zipper-like protein 1
PF3D7_0716800	EIF3I	eukaryotic translation initiation factor 3 subunit I, putative						PF3D7_1361100	SEC24A	protein transport protein Sec24A
PF3D7_0926100	N/A	protein kinase, putative						PF3D7_1339300	N/A	conserved protein, unknown function
PF3D7_1036900	N/A	conserved Plasmodium protein, unknown function						PF3D7_1311500	RPT1	26S protease regulatory subunit 7, putative
PF3D7_1130200	PfP0	60S ribosomal protein P0						PF3D7_1436300	PTEX150	translocon component PTEX150
PF3D7_1134300	EMMA1	erythrocyte membrane and merozoite antigen EMMA1						PF3D7_1419000	N/A	conserved Plasmodium protein, unknown function
PF3D7_1217200	MRD1	multiple RNA-binding domain-containing protein 1, putative						PF3D7_0607000	N/A	translation initiation factor IF-2, putative
PF3D7_1227600	SPC24	kinetochore protein SPC24, putative						PF3D7_1103800	NOT1-G	CCR4-NOT transcription complex subunit NOT1-G, putative
PF3D7_1249600	LRR12	leucine-rich repeat protein						PF3D7_1219000	FRM2	formin 2
PF3D7_1344700	N/A	conserved Plasmodium protein, unknown function						PF3D7_0304100	IMC1e	inner membrane complex protein 1e, putative
PF3D7_1449700	RRP6	exosome complex exonuclease RRP6						PF3D7_0531100	N/A	conserved Plasmodium protein, unknown function
PF3D7_1453400	N/A	gamma-tubulin complex component, putative						PF3D7_1474000	N/A	conserved Plasmodium protein, unknown function
PF3D7_1466100	PPKL	protein phosphatase containing kelch-like domains						PF3D7_0730900	PTP4	EMP1-trafficking protein
PF3D7_0211200	RAB5a	ras-related protein Rab-5A						PF3D7_1447900	MDR2	multidrug resistance protein 2
PF3D7_0520100	PPM9	protein phosphatase PPM9, putative						PF3D7_1004200	N/A	WD repeat-containing protein, putative
PF3D7_0826600	VAMP7	SNARE protein, putative						PF3D7_0624000	HK	hexokinase
PF3D7_0904900	CuTP	copper-transporting ATPase						PF3D7_0320000	I2	protein phosphatase inhibitor 2
PF3D7_1133400	AMA1	apical membrane antigen 1						PF3D7_0907700	PA28	proteasome activator 28
PF3D7_1226800	ATX3	ataxin-3, putative						PF3D7_1449100	N/A	CLASP domain-containing protein, putative
PF3D7_1358800	RPS15	40S ribosomal protein S15						PF3D7_1238100	N/A	calcyclin binding protein, putative
PF3D7_1415000	UDG	uracil-DNA glycosylase						PF3D7_0307500	SKA2	spindle and kinetochore-associated protein 2, putative
PF3D7_1445200	MAK5	ATP-dependent RNA helicase MAK5, putative						PF3D7_0503300	SRSF12	serine/arginine-rich splicing factor 12
PF3D7_1451100	eEF2	elongation factor 2						PF3D7_1012500	N/A	phosphoglucomutase, putative
PF3D7_0204500	AspAT	aspartate transaminase						PF3D7_1303800	N/A	conserved Plasmodium protein, unknown function
PF3D7_0310200	N/A	phd finger protein, putative						PF3D7_0703200	N/A	conserved Plasmodium protein, unknown function
PF3D7_0319100	RBX1	E3 ubiquitin-protein ligase RBX1, putative						PF3D7_0702300	STARP	sporozoite threonine and asparagine-rich protein
PF3D7_0402000	N/A	Plasmodium exported protein (PHISTa), unknown function						PF3D7_0824800	N/A	conserved Plasmodium membrane protein, unknown function
PF3D7_0408300	ZRANB2	zinc finger Ran-binding domain-containing protein 2, putative						PF3D7_0627800	ACAS	acetyl-CoA synthetase
PF3D7_0410800	N/A	conserved Plasmodium protein, unknown function						PF3D7_1311400	AP1M1	AP-1 complex subunit mu-1
PF3D7_0413900	USP13	ubiquitin carboxyl-terminal hydrolase 13, putative						PF3D7_1442700	N/A	conserved Plasmodium protein, unknown function
PF3D7_0505800	SUMO	small ubiquitin-related modifier						PF3D7_1109900	RPL36	60S ribosomal protein L36
PF3D7_0516800	ApiAP2	AP2 domain transcription factor AP2-O2, putative						PF3D7_0527000	MCM3	DNA replication licensing factor MCM3, putative
PF3D7_0517300	SR1	serine/arginine-rich splicing factor 1						PF3D7_1328500	N/A	alpha/beta-hydrolase, putative
PF3D7_0520900	SAHH	adenosylhomocysteinase						PF3D7_0515300	PI3K	phosphatidylinositol 3-kinase
PF3D7_0610600	CDPK2	calcium-dependent protein kinase 2						PF3D7_0202500	ETRAMP2	early transcribed membrane protein 2
PF3D7_0627800	ACAS	acetyl-CoA synthetase						PF3D7_0415400	N/A	coatomer subunit zeta, putative
PF3D7_0704300	N/A	conserved Plasmodium membrane protein, unknown function						PF3D7_1025000	EPS15	Eps15-like protein
PF3D7_0717500	CDPK4	calcium-dependent protein kinase 4						PF3D7_0604100	SIP2	AP2 domain transcription factor
PF3D7_0728600	N/A	RING zinc finger protein, putative						PF3D7_0708800	HSP110c	heat shock protein 110
PF3D7_0809700	RUVB1	RuvB-like helicase 1						PF3D7_0602900	N/A	conserved Plasmodium protein, unknown function
PF3D7_0820000	SRCAP	Snf2-related CBP activator, putative						PF3D7_1138500	PPM2	protein phosphatase PPM2
PF3D7_0823800	N/A	DnaJ protein, putative						PF3D7_1021100	N/A	conserved Plasmodium protein, unknown function
PF3D7_0825900	N/A	conserved Plasmodium protein, unknown function						PF3D7_0826300	N/A	SPRY domain, putative
PF3D7_0903700	N/A	alpha tubulin 1						PF3D7_1448500	N/A	conserved Plasmodium protein, unknown function
PF3D7_0909900	N/A	helicase SKI2W, putative						PF3D7_1223400	N/A	phospholipid-transporting ATPase, putative
PF3D7_0919000	NAPS	nucleosome assembly protein						PF3D7_1303400	LisH	LisH domain-containing protein, putative
PF3D7_0919800	N/A	TLD domain-containing protein						PF3D7_1313800	N/A	conserved Plasmodium membrane protein, unknown function
PF3D7_1013200	N/A	conserved Plasmodium protein, unknown function						PF3D7_0628200	PK4	eukaryotic translation initiation factor 2-alpha kinase
PF3D7_1021800	SEA1	schizont egress antigen-1						PF3D7_1461600	SF3B2	splicing factor 3B subunit 2, putative
PF3D7_1107100	N/A	nucleic acid binding protein, putative						PF3D7_0417800	CRK1	cdc2-related protein kinase 1
PF3D7_1107400	RAD51	DNA repair protein RAD51						PF3D7_1146200	N/A	conserved Plasmodium protein, unknown function
PF3D7_1113400	DSK2	ubiquitin domain-containing protein DSK2, putative						PF3D7_0715800	DMT1	drug/metabolite transporter DMT1, putative
PF3D7_1123400	ERF3	eukaryotic peptide chain release factor GTP-binding subunit, putative						PF3D7_1440800	MFS6	major facilitator superfamily domain-containing protein, putative
PF3D7_1139100	N/A	RNA-binding protein, putative						PF3D7_1438400	MCA2	metacaspase-2
PF3D7_1143900	N/A	ATP-dependent (S)-NAD(P)H-hydrate dehydratase, putative						PF3D7_1145200	N/A	serine/threonine protein kinase, putative
PF3D7_1223100	PKAr	cAMP-dependent protein kinase regulatory subunit						PF3D7_1124600	EK	ethanolamine kinase
PF3D7_1242700	N/A	40S ribosomal protein S17, putative						PF3D7_1108600	ERC	endoplasmic reticulum-resident calcium binding protein
PF3D7_1245500	N/A	conserved Plasmodium protein, unknown function						PF3D7_0707600	MED10	mediator of RNA polymerase II transcription subunit 10, putative
PF3D7_1303400	LisH	LisH domain-containing protein, putative						PF3D7_0805700	FIKK8	serine/threonine protein kinase, FIKK family
PF3D7_1303800	N/A	conserved Plasmodium protein, unknown function						PF3D7_0726500	N/A	ubiquitin carboxyl-terminal hydrolase, putative
PF3D7_1309200	PPM6	protein phosphatase PPM6, putative						PF3D7_1425400	N/A	DEAD/DEAH box helicase, putative
PF3D7_1310400	N/A	conserved Plasmodium protein, unknown function						PF3D7_1203700	NAPL	nucleosome assembly protein
PF3D7_1316100	IPK2	inositol polyphosphate kinase, putative						PF3D7_1245100	KLP8	kinesin-13, putative
PF3D7_1325900	N/A	conserved Plasmodium protein, unknown function						PF3D7_0932000	N/A	conserved Plasmodium protein, unknown function
PF3D7_1342000	N/A	40S ribosomal protein S6						PF3D7_1230800	WTAP	pre-mRNA-splicing regulator WTAP, putative
PF3D7_1405700	N/A	RING zinc finger protein, putative						PF3D7_0622800	N/A	leucine--tRNA ligase, putative
PF3D7_1406200	SPT6	transcription elongation factor SPT6, putative						PF3D7_1462900	N/A	AAA ATPase, putative
PF3D7_1411200	ROM8	rhomboid protease ROM8						PF3D7_0902000	FIKK9.1	serine/threonine protein kinase, FIKK family
PF3D7_1412600	DHS	deoxyhypusine synthase						PF3D7_1315900	N/A	exportin-T, putative
PF3D7_1427300	N/A	conserved Plasmodium protein, unknown function						PF3D7_1224300	PABP1	polyadenylate-binding protein 1, putative
PF3D7_1433500	TOP2	DNA topoisomerase 2						PF3D7_0601600	N/A	tetratricopeptide repeat protein, putative
PF3D7_1434200	CAM	calmodulin						PF3D7_1120000	N/A	conserved protein, unknown function
PF3D7_1441400	FACT-S	FACT complex subunit SSRP1, putative						PF3D7_1123100	CDPK7	calcium-dependent protein kinase 7
PF3D7_1470100	N/A	conserved Plasmodium protein, unknown function						PF3D7_0202000	KAHRP	knob-associated histidine-rich protein
PF3D7_0316500	NUF2	kinetochore protein NUF2, putative						PF3D7_0217500	CDPK1	calcium-dependent protein kinase 1
PF3D7_0523800	N/A	divalent metal transporter, putative						PF3D7_0801000	N/A	Plasmodium exported protein (PHISTc)
PF3D7_0812500	N/A	RNA-binding protein, putative						PF3D7_1435300	N/A	glutamate synthase [NADH], putative
PF3D7_1011800	PREBP	PRE-binding protein						PF3D7_0207600	SERA5	serine repeat antigen 5
PF3D7_1027700	CEN3	centrin-3						PF3D7_1364400	N/A	conserved Plasmodium protein, unknown function
PF3D7_1032100	DCP1	mRNA-decapping enzyme subunit 1, putative						PF3D7_1246300	KIC4	protein KIC4
PF3D7_1107800	ApiAP2	AP2 domain transcription factor, putative						PF3D7_1301600	EBA140	erythrocyte binding antigen-140
PF3D7_1209000	N/A	mago-binding protein, putative						PF3D7_1459600	N/A	AP-4 complex accessory subunit Tepsin, putative
PF3D7_1229100	MRP2	multidrug resistance-associated protein 2						PF3D7_1036900	N/A	conserved Plasmodium protein, unknown function
PF3D7_1243500	SNF7	vacuolar-sorting protein SNF7, putative						PF3D7_1327300	N/A	conserved Plasmodium protein, unknown function
PF3D7_1356400	N/A	phosphatase 2A regulatory subunit-related protein, putative						PF3D7_1142300	N/A	conserved Plasmodium membrane protein, unknown function
PF3D7_1365000	N/A	conserved Plasmodium protein, unknown function						PF3D7_1430300	N/A	acid phosphatase, putative
PF3D7_1440100	N/A	cohesin complex subunit, putative						PF3D7_1146600	ORP1	oocyst rupture protein 1, putative
PF3D7_1452700	N/A	U1 snRNP-associated protein, putative						PF3D7_0728000	eIF2alpha	eukaryotic translation initiation factor 2 subunit alpha
PF3D7_1468800	U2AF2	splicing factor U2AF large subunit, putative						PF3D7_1414300	N/A	60S ribosomal protein L10, putative
PF3D7_0530000	N/A	conserved Plasmodium protein, unknown function						PF3D7_0814200	ALBA1	DNA/RNA-binding protein Alba 1
PF3D7_1233600	AARP1	asparagine and aspartate rich protein 1						PF3D7_0704200	NSUN1	RNA cytosine C(5)-methyltransferase, putative
PF3D7_1362400	Pcalp	calpain						PF3D7_1332200	N/A	conserved protein, unknown function
PF3D7_1409900	CDS	cytidine diphosphate-diacylglycerol synthase						PF3D7_1141800	N/A	EELM2 domain-containing protein, putative
PF3D7_1428200	MFS5	major facilitator superfamily domain-containing protein, putative						PF3D7_0933000	N/A	CSTF domain-containing protein, putative
PF3D7_0104300	UBP1	ubiquitin carboxyl-terminal hydrolase 1, putative						PF3D7_0312400	GSK3	glycogen synthase kinase 3
PF3D7_0108500	N/A	ELM2 domain-containing protein, putative						PF3D7_1020700	N/A	N-acetyltransferase, GNAT family, putative
PF3D7_0422300	N/A	alpha tubulin 2						PF3D7_1001600	XL2	exported lipase 2
PF3D7_0615400	N/A	ribonuclease, putative						PF3D7_0616900	N/A	conserved Plasmodium protein, unknown function
PF3D7_0809900	JmjC1	JmjC domain-containing protein 1, putative						PF3D7_0621100	N/A	conserved Plasmodium protein, unknown function
PF3D7_0906100	VPS46	vacuolar protein sorting-associated protein 46, putative						PF3D7_0731100	PTP2	EMP1-trafficking protein
PF3D7_0936800	N/A	Plasmodium exported protein (PHISTc), unknown function						PF3D7_1317100	MCM4	DNA replication licensing factor MCM4
PF3D7_1115800	N/A	conserved Plasmodium protein, unknown function						PF3D7_0506800	TCF25	transcription factor 25, putative
PF3D7_1119400	N/A	ubiquitin-protein ligase, putative						PF3D7_0923900	PABP2	polyadenylate-binding protein 2, putative
PF3D7_1222700	GAP45	glideosome-associated protein 45						PF3D7_1012000	N/A	RING zinc finger protein, putative
PF3D7_1325100	N/A	phosphoribosylpyrophosphate synthetase						PF3D7_1415000	UDG	uracil-DNA glycosylase
PF3D7_1443100	N/A	conserved Plasmodium protein, unknown function						PF3D7_1231800	N/A	asparagine-rich protein, putative
PF3D7_1444200	N/A	EF-hand calcium-binding domain-containing protein, putative						PF3D7_0110600	PIP5K	phosphatidylinositol-4-phosphate 5-kinase
PF3D7_0210300	N/A	monocarboxylate transporter, putative						PF3D7_0610900	SPT5	transcription elongation factor SPT5, putative
PF3D7_0318500	N/A	conserved Plasmodium protein, unknown function						PF3D7_0303500	N/A	spindle pole body protein, putative
PF3D7_0519400	RPS24	40S ribosomal protein S24						PF3D7_0505700	N/A	conserved Plasmodium membrane protein, unknown function
PF3D7_0530900	FRM1	formin 1						PF3D7_0711400	SAP18	histone deacetylase complex subunit SAP18, putative
PF3D7_0531300	N/A	conserved Plasmodium protein, unknown function						PF3D7_1304400	N/A	PUB domain-containing protein, putative
PF3D7_0627500	DJ1	protein DJ-1						PF3D7_1206300	N/A	conserved Plasmodium protein, unknown function
PF3D7_1015900	ENO	enolase						PF3D7_0309300	N/A	N2227-like protein, putative
PF3D7_1223000	N/A	conserved Plasmodium protein, unknown function						PF3D7_0724700	BDP6	bromodomain protein 6, putative
PF3D7_0219200	RPS30	40S ribosomal protein S30						PF3D7_0907600	N/A	translation initiation factor SUI1, putative
PF3D7_0304100	IMC1e	inner membrane complex protein 1e, putative						PF3D7_0321100	N/A	conserved Plasmodium protein, unknown function
PF3D7_0307700	N/A	conserved Plasmodium protein, unknown function						PF3D7_0409800	N/A	zinc finger protein, putative
PF3D7_0308300	PIC4	PhIL1-interacting candidate PIC4						PF3D7_0813100	N/A	conserved Plasmodium protein, unknown function
PF3D7_0309200	ARK2	serine/threonine protein kinase ARK2, putative						PF3D7_0210900	N/A	conserved Plasmodium protein, unknown function
PF3D7_0323500	SMN	survival motor neuron-like protein						PF3D7_1455500	N/A	AP-1 complex subunit gamma, putative
PF3D7_0414600	APH	acylated pleckstrin-homology domain-containing protein, putative						PF3D7_0714500	N/A	transcription elongation factor s-II, putative
PF3D7_0522100	N/A	conserved Plasmodium protein, unknown function						PF3D7_0602000	N/A	zinc finger protein, putative
PF3D7_0525000	N/A	zinc finger protein, putative						PF3D7_1121300	TKL2	tyrosine kinase-like protein
PF3D7_0526400	N/A	conserved Plasmodium protein, unknown function						PF3D7_0310900	N/A	conserved Plasmodium protein, unknown function
PF3D7_0532300	N/A	Plasmodium exported protein (PHISTb), unknown function						PF3D7_1017500	ELC	myosin essential light chain ELC
PF3D7_0616600	N/A	conserved protein, unknown function						PF3D7_0904600	N/A	ubiquitin specific protease, putative
PF3D7_0625200	N/A	conserved Plasmodium protein, unknown function						PF3D7_0203000	ROPE	repetitive organellar protein, putative
PF3D7_0703600	N/A	conserved protein, unknown function						PF3D7_0605500	N/A	cyclin dependent kinase binding protein, putative
PF3D7_0704200	NSUN1	RNA cytosine C(5)-methyltransferase, putative						PF3D7_0104800	NPT1	novel putative transporter 1, putative
PF3D7_0723900	N/A	RNA-binding protein, putative						PF3D7_1437900	HSP40	HSP40, subfamily A
PF3D7_0802000	GDH3	glutamate dehydrogenase, putative						PF3D7_0615800	COG4	conserved oligomeric Golgi complex subunit 4, putative
PF3D7_0922100	N/A	ubiquitin-like protein, putative						PF3D7_1145400	DYN1	dynamin-like protein
PF3D7_0922500	PGK	phosphoglycerate kinase						PF3D7_1310700	PIC5	PhIL1-interacting candidate PIC5
PF3D7_0924000	N/A	patatin-like phospholipase, putative						PF3D7_0521700	DDX1	ATP-dependent RNA helicase DDX1, putative
PF3D7_0928800	N/A	serine/threonine protein kinase, putative						PF3D7_1452600	N/A	conserved Plasmodium protein, unknown function
PF3D7_0930600	CYP72	peptidyl-prolyl cis-trans isomerase						PF3D7_0704300	N/A	conserved Plasmodium membrane protein, unknown function
PF3D7_1008100	PHD1	PHD finger protein PHD1						PF3D7_0528100	N/A	AP-1/2 complex subunit beta, putative
PF3D7_1011700	RAD23	DNA repair protein RAD23, putative						PF3D7_0706500	N/A	conserved Plasmodium protein, unknown function
PF3D7_1033300	N/A	conserved protein, unknown function						PF3D7_0618600	ROM10	rhomboid protease ROM10
PF3D7_1119900	SEC16	protein transport protein SEC16, putative						PF3D7_0410800	N/A	conserved Plasmodium protein, unknown function
PF3D7_1122500	KIC10	protein KIC10						PF3D7_1343100	N/A	conserved Plasmodium protein, unknown function
PF3D7_1127900	N/A	conserved Plasmodium protein, unknown function						PF3D7_1365000	N/A	conserved Plasmodium protein, unknown function
PF3D7_1132400	N/A	conserved Plasmodium membrane protein, unknown function						PF3D7_0818900	HSP70	heat shock protein 70
PF3D7_1234100	BDP5	bromodomain protein 5						PF3D7_0910300	N/A	conserved protein, unknown function
PF3D7_1317600	N/A	conserved Plasmodium protein, unknown function						PF3D7_0904100	N/A	AP-4 complex subunit epsilon, putative
PF3D7_1320900	N/A	RNA-binding protein, putative						PF3D7_1312900	EIF4G	eukaryotic translation initation factor 4 gamma
PF3D7_1326300	N/A	RNA-binding protein, putative						PF3D7_1143100	AP2-O	AP2 domain transcription factor AP2-O
PF3D7_1332200	N/A	conserved protein, unknown function						PF3D7_0811500	CARM1	histone-arginine methyltransferase CARM1, putative
PF3D7_1333800	N/A	Voldacs domain-containing protein, putative						PF3D7_1428800	N/A	transcription initiation TFIID-like, putative
PF3D7_1341900	N/A	V-type proton ATPase subunit D, putative						PF3D7_0609100	ZIP1	zinc transporter ZIP1, putative
PF3D7_1360100	RRM1	RNA-binding protein, putative						PF3D7_0903400	DDX60	ATP-dependent RNA helicase DDX60, putative
PF3D7_1364200	NUP205	nucleoporin NUP205, putative						PF3D7_0818200	14-3-3I	14-3-3 protein
PF3D7_1412400	N/A	conserved Plasmodium protein, unknown function						PF3D7_1435500	CLC	clathrin light chain, putative
PF3D7_1417700	N/A	conserved protein, unknown function						PF3D7_1211900	ATP4	non-SERCA-type Ca2+ -transporting P-ATPase
PF3D7_1435400	EMC4	ER membrane protein complex subunit 4, putative						PF3D7_0505000	N/A	MMS19-like protein, putative
PF3D7_1455300	N/A	conserved protein, unknown function						PF3D7_0214800	N/A	conserved Plasmodium membrane protein, unknown function
PF3D7_1460600	ISP3	inner membrane complex sub-compartment protein 3						PF3D7_1136700	AIP	armadillo-interacting protein AIP
PF3D7_1470300	N/A	conserved Plasmodium protein, unknown function						PF3D7_1105800	N/A	conserved Apicomplexan protein, unknown function
PF3D7_0105700	N/A	asparagine-rich antigen Pfa35-2						PF3D7_0930600	CYP72	peptidyl-prolyl cis-trans isomerase
PF3D7_0707400	N/A	AAA family ATPase, putative						PF3D7_0704600	UT	HECT-type E3 ubiquitin ligase UT
PF3D7_1113300	UGT	UDP-galactose transporter, putative						PF3D7_1429900	WRN	ADP-dependent DNA helicase RecQ
PF3D7_1142100	N/A	conserved Plasmodium protein, unknown function						PF3D7_0826500	UBE4B	ubiquitin conjugation factor E4 B, putative
PF3D7_1316600	CCT	choline-phosphate cytidylyltransferase						PF3D7_1005500	UPF1	regulator of nonsense transcripts 1, putative
PF3D7_1323200	N/A	V-type proton ATPase subunit G, putative						PF3D7_0214300	N/A	conserved Plasmodium protein, unknown function
PF3D7_0629500	AAT1	amino acid transporter AAT1						PF3D7_1326500	N/A	conserved Plasmodium protein, unknown function
PF3D7_0630300	N/A	DNA polymerase epsilon catalytic subunit A, putative						PF3D7_1112100	N/A	conserved Plasmodium protein, unknown function
PF3D7_1002800	N/A	DnaJ protein, putative						PF3D7_1020900	ARF1	ADP-ribosylation factor 1
PF3D7_0219700	GEXP20	Plasmodium exported protein (PHISTc), unknown function						PF3D7_1032100	DCP1	mRNA-decapping enzyme subunit 1, putative
PF3D7_0321500	N/A	peptidase, putative						PF3D7_0823300	GCN5	histone acetyltransferase GCN5
PF3D7_0407900	N/A	AAA family ATPase, putative						PF3D7_1349300	TKL3	tyrosine kinase-like protein
PF3D7_0424600	N/A	Plasmodium exported protein (PHISTb)						PF3D7_1333600	UTP4	U3 small nucleolar RNA-associated protein 4, putative
PF3D7_0925400	N/A	protein phosphatase-beta						PF3D7_1223100	PKAr	cAMP-dependent protein kinase regulatory subunit
PF3D7_0930800	N/A	conserved Plasmodium membrane protein, unknown function						PF3D7_0801700	SENP2	sentrin-specific protease 2, putative
PF3D7_1029900	N/A	ORC3 domain-containing protein, putative						PF3D7_0308100	N/A	zinc finger protein, putative
PF3D7_1116700	DPAP1	dipeptidyl aminopeptidase 1						PF3D7_1369700	SNRPA1	U2 small nuclear ribonucleoprotein A', putative
PF3D7_1127600	N/A	CRAL/TRIO domain-containing protein, putative						PF3D7_0914700	MFR4	major facilitator superfamily-related transporter, putative
PF3D7_1139800	N/A	conserved Plasmodium protein, unknown function						PF3D7_0905800	N/A	conserved Plasmodium protein, unknown function
PF3D7_1405300	N/A	conserved Plasmodium protein, unknown function						PF3D7_0629500	AAT1	amino acid transporter AAT1
PF3D7_1444800	FBPA	fructose-bisphosphate aldolase						PF3D7_0411300	N/A	conserved Plasmodium protein, unknown function
PF3D7_1445700	N/A	conserved Plasmodium protein, unknown function						PF3D7_1114700	CLK3	cyclin-dependent-like kinase CLK3
PF3D7_0307500	SKA2	spindle and kinetochore-associated protein 2, putative						PF3D7_1238500	N/A	conserved Plasmodium protein, unknown function
PF3D7_0316700	YOP1	protein YOP1, putative						PF3D7_0302100	SRPK1	serine/threonine protein kinase
PF3D7_0319700	ABCI3	ABC transporter I family member 1, putative						PF3D7_0218100	N/A	conserved protein, unknown function
PF3D7_1123200	LRR11	leucine-rich repeat protein						PF3D7_1249800	THO2	THO complex subunit 2, putative
PF3D7_1148800	N/A	Plasmodium exported protein (hyp11), unknown function						PF3D7_1227800	ELP3	elongator complex protein 3, putative
PF3D7_1346500	N/A	conserved Plasmodium protein, unknown function						PF3D7_0717200	N/A	conserved Plasmodium protein, unknown function
PF3D7_1439800	N/A	vesicle-associated membrane protein, putative						PF3D7_0813200	N/A	CS domain protein, putative
PF3D7_1441600	N/A	acid cluster protein 33 homologue, putative						PF3D7_1013900	N/A	translation initiation factor eIF-2B subunit delta, putative
PF3D7_0103400	N/A	zinc-carboxypeptidase, putative						PF3D7_1104200	SNF2L	chromatin remodeling protein
PF3D7_0211800	AsnRS	asparagine--tRNA ligase						PF3D7_1034500	N/A	armadillo repeat protein, putative
PF3D7_0217600	N/A	conserved Plasmodium protein, unknown function						PF3D7_0703900	N/A	conserved Plasmodium membrane protein, unknown function
PF3D7_0303300	RPB6	DNA-directed RNA polymerases I, II, and III subunit RPABC2, putative						PF3D7_1443100	N/A	conserved Plasmodium protein, unknown function
PF3D7_0521000	N/A	conserved Plasmodium protein, unknown function						PF3D7_1438000	N/A	eukaryotic translation initiation factor eIF2A, putative
PF3D7_0528700	CYP23	peptidyl-prolyl cis-trans isomerase						PF3D7_1008700	N/A	tubulin beta chain
PF3D7_0530100	SYN6	SNARE protein, putative						PF3D7_1211700	MCM5	DNA replication licensing factor MCM5, putative
PF3D7_0621800	N/A	nascent polypeptide-associated complex subunit alpha, putative						PF3D7_0826700	RACK1	receptor for activated c kinase
PF3D7_0627300	RNF5	E3 ubiquitin-protein ligase RNF5, putative						PF3D7_0625200	N/A	conserved Plasmodium protein, unknown function
PF3D7_0628100	HECT1	HECT domain-containing protein 1, putative						PF3D7_0518500	DDX23	ATP-dependent RNA helicase DDX23, putative
PF3D7_0629100	NAPRT	nicotinate phosphoribosyltransferase, putative						PF3D7_1029400	CDC50C	LEM3/CDC50 family protein, putative
PF3D7_0724100	N/A	conserved Plasmodium protein, unknown function						PF3D7_1402800	N/A	conserved Plasmodium protein, unknown function
PF3D7_0730400	IMP2	IMP1-like protein, putative						PF3D7_0423700	ETRAMP4	early transcribed membrane protein 4
PF3D7_0818000	SNRNP27	U4/U6.U5 small nuclear ribonucleoprotein, putative						PF3D7_0617900	H3.3	histone H3 variant
PF3D7_0828000	ROM3	rhomboid protease ROM3						PF3D7_1240000	N/A	3-hydroxyisobutyryl-CoA hydrolase, putative
PF3D7_0903400	DDX60	ATP-dependent RNA helicase DDX60, putative						PF3D7_1464700	N/A	ATP synthase (C/AC39) subunit, putative
PF3D7_0932300	M18AAP	M18 aspartyl aminopeptidase						PF3D7_1449500	ApiAP2	AP2 domain transcription factor AP2-O5, putative
PF3D7_1012000	N/A	RING zinc finger protein, putative						PF3D7_0933700	N/A	conserved Plasmodium protein, unknown function
PF3D7_1027300	nPrx	peroxiredoxin						PF3D7_0405100	SEC24B	protein transport protein Sec24B, putative
PF3D7_1036700	PhLP2	phosducin-like protein 2, putative						PF3D7_1147300	N/A	conserved Plasmodium protein, unknown function
PF3D7_1104200	SNF2L	chromatin remodeling protein						PF3D7_1124400	LSM1	U6 snRNA-associated Sm-like protein LSm1, putative
PF3D7_1136400	SRP72	signal recognition particle subunit SRP72, putative						PF3D7_0926500	N/A	tetratricopeptide repeat protein, putative
PF3D7_1212400	N/A	tetratricopeptide repeat protein, putative						PF3D7_1467100	MAG	DNA-3-methyladenine glycosylase
PF3D7_1215400	N/A	conserved Plasmodium protein, unknown function						PF3D7_1445900	DDX17	ATP-dependent RNA helicase DDX17
PF3D7_1218500	DRPC	dynamin-like protein, putative						PF3D7_1125500	SNRPD1	small nuclear ribonucleoprotein Sm D1, putative
PF3D7_1224700	N/A	conserved Plasmodium protein, unknown function						PF3D7_1352400	N/A	conserved Plasmodium protein, unknown function
PF3D7_1303500	NHE	sodium/hydrogen exchanger						PF3D7_0308200	CCT7	T-complex protein 1 subunit eta
PF3D7_1332900	cyto-IRS	isoleucine--tRNA ligase, putative						PF3D7_1448000	UTP12	U3 small nucleolar RNA-associated protein 12, putative
PF3D7_1343700	Kelch13	kelch protein K13						PF3D7_0525100	ACS10	acyl-CoA synthetase
PF3D7_1349500	N/A	conserved Plasmodium protein, unknown function						PF3D7_0914100	N/A	conserved Plasmodium protein, unknown function
PF3D7_1358200	N/A	conserved Plasmodium protein, unknown function						PF3D7_1117900	N/A	conserved Plasmodium protein, unknown function
PF3D7_1417500	CBF5	H/ACA ribonucleoprotein complex subunit 4, putative						PF3D7_0104300	UBP1	ubiquitin carboxyl-terminal hydrolase 1, putative
PF3D7_1419600	N/A	conserved Plasmodium protein, unknown function						PF3D7_1428200	MFS5	major facilitator superfamily domain-containing protein, putative
PF3D7_1423800	VPS3	vacuolar protein sorting-associated protein 3, putative						PF3D7_1366900	N/A	conserved protein, unknown function
PF3D7_1430300	N/A	acid phosphatase, putative						PF3D7_0508700	PRP5	pre-mRNA-processing ATP-dependent RNA helicase PRP5, putative
PF3D7_1431500	MAPK1	mitogen-activated protein kinase 1						PF3D7_1445700	N/A	conserved Plasmodium protein, unknown function
PF3D7_1435600	N/A	conserved Plasmodium protein, unknown function						PF3D7_0606100	N/A	RNA-binding protein, putative
PF3D7_1447000	N/A	40S ribosomal protein S5						PF3D7_1405300	N/A	conserved Plasmodium protein, unknown function
PF3D7_1467900	N/A	rab GTPase activator, putative						PF3D7_0932100	N/A	protein MAM3, putative
PF3D7_1475600	BDP4	bromodomain protein 4, putative						PF3D7_0318700	N/A	conserved Plasmodium protein, unknown function
PF3D7_0523400	N/A	DnaJ protein, putative						PF3D7_0530900	FRM1	formin 1
PF3D7_0605100	KH1	KH domain-containing protein, putative						PF3D7_0310300	N/A	phosphoglycerate mutase, putative
PF3D7_0706400	RPL37	60S ribosomal protein L37						PF3D7_0103300	N/A	conserved protein, unknown function
PF3D7_1023700	N/A	conserved Plasmodium protein, unknown function						PF3D7_0405400	PRPF8	pre-mRNA-processing-splicing factor 8, putative
PF3D7_1316800	SEC20	protein transport protein SEC20, putative						PF3D7_0110800	N/A	transcription initiation factor TFIIB, putative
PF3D7_0320000	I2	protein phosphatase inhibitor 2						PF3D7_1443600	N/A	gamma-tubulin complex component, putative
PF3D7_0406000	N/A	conserved protein, unknown function						PF3D7_0108800	N/A	mitochondrial carrier protein, putative
PF3D7_0406100	N/A	V-type proton ATPase subunit B						PF3D7_1224500	ASF1	histone chaperone ASF1
PF3D7_0419600	RANBP1	ran-specific GTPase-activating protein 1, putative						PF3D7_1359100	N/A	riboflavin kinase, putative
PF3D7_0613800	ApiAP2	AP2 domain transcription factor, putative						PF3D7_1441500	N/A	conserved Plasmodium protein, unknown function
PF3D7_0718100	EST	exported serine/threonine protein kinase						PF3D7_1406200	SPT6	transcription elongation factor SPT6, putative
PF3D7_0929000	TAF7	transcription initiation factor TFIID subunit 7, putative						PF3D7_1246200	ACT1	actin I
PF3D7_1022000	N/A	RNA-binding protein UIS12, putative						PF3D7_1453000	N/A	conserved Plasmodium protein, unknown function
PF3D7_1308400	N/A	conserved Plasmodium protein, unknown function						PF3D7_0310200	N/A	phd finger protein, putative
PF3D7_1421200	RPS25	40S ribosomal protein S25						PF3D7_0528000	UMP1	proteasome maturation factor UMP1, putative
PF3D7_1428900	N/A	conserved Plasmodium protein, unknown function						PF3D7_1403700	TRAM	translocation associated membrane protein, putative
PF3D7_0303200	N/A	lipin, putative						PF3D7_1429600	GEXP03	conserved Plasmodium protein, unknown function
PF3D7_0316600	FNT	formate-nitrite transporter						PF3D7_1336800	NUDC	nuclear movement protein, putative
PF3D7_0407000	N/A	conserved Plasmodium protein, unknown function						PF3D7_1233900	SENP1	sentrin-specific protease 1
PF3D7_0407700	N/A	conserved Plasmodium protein, unknown function						PF3D7_1023700	N/A	conserved Plasmodium protein, unknown function
PF3D7_0416900	N/A	conserved Plasmodium protein, unknown function						PF3D7_1133800	N/A	RNA (uracil-5-)methyltransferase, putative
PF3D7_0523900	N/A	MerC domain-containing protein, putative						PF3D7_1447200	N/A	conserved protein, unknown function
PF3D7_0528800	N/A	nuclear GTP-binding protein, putative						PF3D7_1121900	PDK1	3-phosphoinositide-dependent protein kinase 1
PF3D7_0602000	N/A	zinc finger protein, putative						PF3D7_0914500	N/A	conserved Plasmodium protein, unknown function
PF3D7_1030300	N/A	conserved Plasmodium protein, unknown function						PF3D7_1408100	PMIII	plasmepsin III
PF3D7_1105800	N/A	conserved Apicomplexan protein, unknown function						PF3D7_0501300	SBP1	skeleton-binding protein 1
PF3D7_1149200	RESA3	ring-infected erythrocyte surface antigen						PF3D7_1129400	NSUN3	RNA cytosine C(5)-methyltransferase, putative
PF3D7_1205200	HADO	HAD domain ookinete protein, putative						PF3D7_1028600	N/A	conserved Plasmodium protein, unknown function
PF3D7_1248400	N/A	conserved Plasmodium protein, unknown function						PF3D7_1450000	N/A	serine/threonine protein kinase, putative
PF3D7_1357700	UTP21	U3 small nucleolar RNA-associated protein 21, putative						PF3D7_1033600	CEF1	pre-mRNA-splicing factor CEF1, putative
PF3D7_1405000	N/A	conserved Plasmodium protein, unknown function						PF3D7_0303300	RPB6	DNA-directed RNA polymerases I, II, and III subunit RPABC2, putative
PF3D7_1408200	AP2-G2	AP2 domain transcription factor AP2-G2						PF3D7_1016300	GBP130	GBP130 protein
PF3D7_0506100	N/A	60S ribosomal subunit protein L24, putative						PF3D7_1216900	N/A	DNA-binding chaperone, putative
PF3D7_0522600	N/A	magnesium transporter NIPA, putative						PF3D7_0611800	N/A	conserved Plasmodium protein, unknown function
PF3D7_1019000	N/A	eukaryotic translation initiation factor subunit eIF2A, putative						PF3D7_1110900	N/A	ES2 protein, putative
PF3D7_1203300	N/A	TBCC domain-containing protein, putative						PF3D7_1149200	RESA3	ring-infected erythrocyte surface antigen
PF3D7_1208900	PPM11	protein phosphatase PPM11, putative						PF3D7_1116800	HSP101	heat shock protein 101
PF3D7_1241500	N/A	conserved Plasmodium protein, unknown function						PF3D7_1122400	N/A	conserved Plasmodium protein, unknown function
PF3D7_1348300	N/A	elongation factor Tu, putative						PF3D7_1353400	N/A	Ran-binding protein, putative
PF3D7_1416100	SEY1	protein SEY1, putative						PF3D7_1108400	CK2alpha	casein kinase 2, alpha subunit
PF3D7_1443600	N/A	gamma-tubulin complex component, putative						PF3D7_1349500	N/A	conserved Plasmodium protein, unknown function
PF3D7_1467100	MAG	DNA-3-methyladenine glycosylase						PF3D7_1468400	D13	zinc finger protein, putative
PF3D7_0215700	RPB2	DNA-directed RNA polymerase II subunit RPB2, putative						PF3D7_1243900	DOC2	double C2-like domain-containing protein
PF3D7_0215800	ORC5	origin recognition complex subunit 5						PF3D7_1231600	PRP2	pre-mRNA-splicing factor ATP-dependent RNA helicase PRP2, putative
PF3D7_0413700	N/A	lysine decarboxylase-like protein, putative						PF3D7_0916000	MFS2	major facilitator superfamily domain-containing protein, putative
PF3D7_0509500	N/A	ERCC4 domain-containing protein, putative						PF3D7_1208100	N/A	conserved Plasmodium protein, unknown function
PF3D7_0604100	SIP2	AP2 domain transcription factor						PF3D7_0508500	ND6	ND6 protein, putative
PF3D7_0607700	N/A	conserved Plasmodium protein, unknown function						PF3D7_1356600	N/A	regulator of chromosome condensation, putative
PF3D7_0608800	OAT	ornithine aminotransferase						PF3D7_1427300	N/A	conserved Plasmodium protein, unknown function
PF3D7_0724000	N/A	Rab GTPase activator and protein kinase, putative						PF3D7_1129900	MFR5	major facilitator superfamily-related transporter, putative
PF3D7_0730500	N/A	conserved Plasmodium protein, unknown function						PF3D7_1408600	N/A	40S ribosomal protein S8e, putative
PF3D7_0803300	MORG1	mitogen-activated protein kinase organizer 1, putative						PF3D7_1406100	N/A	tubby domain-containing protein, putative
PF3D7_0911100	N/A	START domain-containing protein, putative						PF3D7_0720700	PX1	phosphoinositide-binding protein PX1
PF3D7_0914900	N/A	BSD-domain protein, putative						PF3D7_1416600	N/A	conserved Plasmodium protein, unknown function
PF3D7_1004300	N/A	E3 ubiquitin-protein ligase, putative						PF3D7_0933500	N/A	gamma-tubulin complex component, putative
PF3D7_1130700	SMC1	structural maintenance of chromosomes protein 1, putative						PF3D7_0915400	PFK9	ATP-dependent 6-phosphofructokinase
PF3D7_1138700	KIC5	protein KIC5						PF3D7_1316600	CCT	choline-phosphate cytidylyltransferase
PF3D7_1138800	N/A	WD repeat-containing protein, putative						PF3D7_0323700	SART1	U4/U6.U5 tri-snRNP-associated protein 1, putative
PF3D7_1217400	N/A	conserved protein, unknown function						PF3D7_1205600	N/A	tetratricopeptide repeat protein, putative
PF3D7_1246400	MTIP	myosin A-tail interacting protein						PF3D7_0303100	N/A	CLP1 P-loop domain-containing protein, putative
PF3D7_1307200	N/A	DnaJ protein, putative						PF3D7_1007200	N/A	rho GTPase-activating protein, putative
PF3D7_1309700	VPS18	vacuolar protein sorting-associated protein 18, putative						PF3D7_1211200	N/A	conserved Plasmodium protein, unknown function
PF3D7_1319100	N/A	ubiquitin carboxyl-terminal hydrolase MINDY, putative						PF3D7_0422500	BRR2	pre-mRNA-splicing helicase BRR2, putative
PF3D7_1366900	N/A	conserved protein, unknown function						PF3D7_0410000	EVP1	erythrocyte vesicle protein 1
PF3D7_1405800	BOP1	ribosome biogenesis protein BOP1, putative						PF3D7_1475600	BDP4	bromodomain protein 4, putative
PF3D7_1429900	WRN	ADP-dependent DNA helicase RecQ						PF3D7_1139800	N/A	conserved Plasmodium protein, unknown function
PF3D7_1449100	N/A	CLASP domain-containing protein, putative						PF3D7_1121000	DHHC3	palmitoyltransferase DHHC3
PF3D7_1458600	N/A	zinc finger protein, putative						PF3D7_1341900	N/A	V-type proton ATPase subunit D, putative
PF3D7_1461100	N/A	conserved Plasmodium protein, unknown function						PF3D7_1205500	N/A	zinc finger protein, putative
PF3D7_0603500	CAX	cation/H+ antiporter						PF3D7_1468700	eIF4A	eukaryotic initiation factor 4A
PF3D7_0609700	KIC6	protein KIC6						PF3D7_0305600	APE1	DNA-(apurinic or apyrimidinic site) endonuclease
PF3D7_0705300	ORC2	origin recognition complex subunit 2						PF3D7_1328300	N/A	conserved protein, unknown function
PF3D7_0905100	NUP221	nucleoporin NUP221, putative						PF3D7_0922900	FabG	3-oxoacyl-[acyl-carrier-protein] reductase
PF3D7_0906400	N/A	dynein intermediate light chain, putative						PF3D7_1119800	ASF1	alternative splicing factor ASF-1, putative
PF3D7_1363100	N/A	conserved Plasmodium protein, unknown function						PF3D7_0918300	EIF3F	eukaryotic translation initiation factor 3 subunit F, putative
PF3D7_0322900	RPS3A	40S ribosomal protein S3A, putative						PF3D7_1126000	ThrRS	threonine--tRNA ligase
PF3D7_0826300	N/A	SPRY domain, putative						PF3D7_0814500	N/A	conserved protein, unknown function
PF3D7_1227800	ELP3	elongator complex protein 3, putative						PF3D7_0410900	N/A	conserved Plasmodium protein, unknown function
PF3D7_1434600	METAP2	methionine aminopeptidase 2						PF3D7_0309200	ARK2	serine/threonine protein kinase ARK2, putative
PF3D7_0703200	N/A	conserved Plasmodium protein, unknown function						PF3D7_1104300	N/A	conserved Plasmodium protein, unknown function
PF3D7_1004200	N/A	WD repeat-containing protein, putative						PF3D7_0610600	CDPK2	calcium-dependent protein kinase 2
PF3D7_1134800	N/A	coatomer subunit delta						PF3D7_1368800	ERCC4	DNA repair endonuclease XPF, putative
PF3D7_1320700	N/A	conserved protein, unknown function						PF3D7_0308700	N/A	conserved protein, unknown function
PF3D7_1364800	RPB5	DNA-directed RNA polymerases I, II, and III subunit RPABC1, putative						PF3D7_1026800	RPS2	40S ribosomal protein S2
PF3D7_0202600	N/A	nucleic acid-binding protein, putative						PF3D7_0501800	CAF1A	chromatin assembly factor 1 subunit A
PF3D7_0214100	SEC31	protein transport protein SEC31						PF3D7_1031300	N/A	SAE2 domain-containing protein, putative
PF3D7_0406200	Pfs16	parasitophorous vacuole membrane protein S16						PF3D7_1427500	MSH2-1	DNA mismatch repair protein MSH2, putative
PF3D7_0609800	DHHC2	palmitoyltransferase DHHC2, putative						PF3D7_1037300	AAC1	ADP,ATP carrier protein 1
PF3D7_0622800	N/A	leucine--tRNA ligase, putative						PF3D7_1015400	N/A	RMI1 domain-containing protein, putative
PF3D7_0624600	ISWI	ISWI chromatin-remodeling complex ATPase						PF3D7_1237400	N/A	hydrolase, putative
PF3D7_0714300	DHHC4	palmitoyltransferase DHHC4, putative						PF3D7_0407700	N/A	conserved Plasmodium protein, unknown function
PF3D7_0905300	N/A	dynein heavy chain, putative						PF3D7_0113200	N/A	Plasmodium exported protein, unknown function
PF3D7_1236100	CARP	clustered-asparagine-rich protein						PF3D7_1410200	CTPS	CTP synthase
PF3D7_1249100	N/A	THUMP domain-containing protein, putative						PF3D7_1315500	N/A	conserved protein, unknown function
PF3D7_1313000	NEDD8	ubiquitin-like protein Nedd8						PF3D7_1233200	N/A	conserved Plasmodium protein, unknown function
PF3D7_1318700	AAP4	protein AAP4						PF3D7_0202400	PTEF	translation-enhancing factor
PF3D7_0216700	ATG11	autophagy-related protein 11, putative						PF3D7_0926800	N/A	conserved Plasmodium protein, unknown function
PF3D7_0321700	N/A	conserved Plasmodium protein, unknown function						PF3D7_0525000	N/A	zinc finger protein, putative
PF3D7_0509800	PI4KB	phosphatidylinositol 4-kinase beta						PF3D7_1340300	N/A	nucleolar complex protein 2, putative
PF3D7_0607200	N/A	RING zinc finger protein, putative						PF3D7_1306400	RPT4	26S protease regulatory subunit 10B, putative
PF3D7_0625000	SMS1	sphingomyelin synthase 1, putative						PF3D7_0701600	MC-2TM	Pfmc-2TM Maurer's cleft two transmembrane protein
PF3D7_0627100	N/A	ankyrin-repeat protein, putative						PF3D7_0932300	M18AAP	M18 aspartyl aminopeptidase
PF3D7_0705400	MCM7	DNA replication licensing factor MCM7						PF3D7_1209200	LSM7	U6 snRNA-associated Sm-like protein LSm7, putative
PF3D7_0722500	CWC15	pre-mRNA-splicing factor CWC15, putative						PF3D7_0530300	PIC6	PhIL1-interacting candidate PIC6
PF3D7_0805700	FIKK8	serine/threonine protein kinase, FIKK family						PF3D7_0626400	N/A	CRAL/TRIO domain-containing protein, putative
PF3D7_0807600	N/A	conserved Plasmodium protein, unknown function						PF3D7_1309200	PPM6	protein phosphatase PPM6, putative
PF3D7_0914400	KIC3	protein KIC3						PF3D7_1438100	SEC62	translocation protein SEC62, putative
PF3D7_0929200	N/A	RNA-binding protein, putative						PF3D7_0608500	N/A	proteasome subunit alpha type-2, putative
PF3D7_1010600	eIF2beta	eukaryotic translation initiation factor 2 subunit beta						PF3D7_0316600	FNT	formate-nitrite transporter
PF3D7_1014900	KIC8	protein KIC8						PF3D7_1129100	PV1	parasitophorous vacuolar protein 1
PF3D7_1140700	N/A	chromo domain-containing protein, putative						PF3D7_1234800	SF3B3	splicing factor 3B subunit 3, putative
PF3D7_1146000	RSA4	ribosome assembly protein 4, putative						PF3D7_1461800	N/A	conserved Plasmodium protein, unknown function
PF3D7_1220100	PRP17	pre-mRNA-processing factor 17, putative						PF3D7_1468900	N/A	zinc finger protein, putative
PF3D7_1224100	N/A	conserved protein, unknown function						PF3D7_1359400	CELF1	CUGBP Elav-like family member 1
PF3D7_1228800	N/A	WD repeat-containing protein, putative						PF3D7_1131800	N/A	oxysterol-binding protein, putative
PF3D7_1248900	RPT6	26S protease regulatory subunit 8, putative						PF3D7_0516700	N/A	ubiquitin carboxyl-terminal hydrolase 2, putative
PF3D7_1313500	N/A	conserved Plasmodium membrane protein, unknown function						PF3D7_0917700	N/A	GPN-loop GTPase, putative
PF3D7_1332800	N/A	eukaryotic translation initiation factor 6, putative						PF3D7_0313000	N/A	conserved Plasmodium protein, unknown function
PF3D7_1356600	N/A	regulator of chromosome condensation, putative						PF3D7_1010200	N/A	DNA2/NAM7 helicase, putative
PF3D7_1407300	PRP38B	pre-mRNA-splicing factor 38B, putative						PF3D7_0102200	RESA	ring-infected erythrocyte surface antigen
PF3D7_1410300	N/A	WD repeat-containing protein, putative						PF3D7_0934800	PKAc	cAMP-dependent protein kinase catalytic subunit
PF3D7_1422400	N/A	nucleolar RNA-associated protein, putative						PF3D7_1365700	N/A	SNARE associated Golgi protein, putative
PF3D7_1437000	N/A	N-acetyltransferase, GNAT family, putative						PF3D7_1226600	PCNA2	proliferating cell nuclear antigen 2
PF3D7_0214000	CCT8	T-complex protein 1 subunit theta						PF3D7_1033300	N/A	conserved protein, unknown function
PF3D7_0311100	N/A	pre-mRNA splicing factor, putative						PF3D7_0924500	N/A	conserved Plasmodium membrane protein, unknown function
PF3D7_1116100	N/A	serine esterase, putative						PF3D7_0919800	N/A	TLD domain-containing protein
PF3D7_1128600	NOT2	CCR4-NOT transcription complex subunit 2, putative						PF3D7_0613900	MyoE	myosin E, putative
PF3D7_1235200	VP2	V-type K+-independent H+-translocating inorganic pyrophosphatase						PF3D7_0519700	N/A	FoP domain-containing protein, putative
PF3D7_1312800	AAP2	protein AAP2						PF3D7_1007700	AP2-I	AP2 domain transcription factor AP2-I
PF3D7_1451000	N/A	conserved Plasmodium protein, unknown function						PF3D7_0204700	HT1	hexose transporter
PF3D7_0519800	N/A	EELM2 domain-containing protein, putative						PF3D7_1417600	N/A	ookinete surface and oocyst capsule protein OSCP, putative
PF3D7_0825500	KRI1	protein KRI1, putative						PF3D7_0818700	N/A	DNA helicase, putative
PF3D7_0828300	N/A	conserved protein, unknown function						PF3D7_1214900	N/A	conserved protein, unknown function
PF3D7_1449500	ApiAP2	AP2 domain transcription factor AP2-O5, putative						PF3D7_1107200	N/A	conserved protein, unknown function
PF3D7_0201700	N/A	DnaJ protein, putative						PF3D7_1019700	N/A	conserved Plasmodium protein, unknown function
PF3D7_0525100	ACS10	acyl-CoA synthetase						PF3D7_1324000	N/A	conserved Plasmodium protein, unknown function
PF3D7_0616300	N/A	conserved Plasmodium protein, unknown function						PF3D7_0807200	N/A	conserved Plasmodium membrane protein, unknown function
PF3D7_1408400	FANCJ	FANCJ-like helicase, putative						PF3D7_0412200	N/A	conserved Plasmodium protein, unknown function
PF3D7_0208100	N/A	conserved Plasmodium protein, unknown function						PF3D7_0714000	H2B.Z	histone H2B variant
PF3D7_0309500	AS	asparagine synthetase [glutamine-hydrolyzing], putative						PF3D7_1012700	NIF4	NLI interacting factor-like phosphatase, putative
PF3D7_0405100	SEC24B	protein transport protein Sec24B, putative						PF3D7_0411800	N/A	conserved Plasmodium protein, unknown function
PF3D7_1002200	PArt	tryptophan-rich antigen 3						PF3D7_1401600	N/A	Plasmodium exported protein (PHISTb), unknown function
PF3D7_1015100	N/A	CWC16 domain-containing protein, putative						PF3D7_1126500	N/A	WD repeat-containing protein, putative
PF3D7_1034500	N/A	armadillo repeat protein, putative						PF3D7_1473400	N/A	conserved protein, unknown function
PF3D7_1220500	TSR3	ribosome biogenesis protein TSR3, putative						PF3D7_1349600	N/A	conserved Plasmodium protein, unknown function
PF3D7_1230000	N/A	TBC domain-containing protein, putative						PF3D7_1032800	LRR1	leucine-rich repeat protein
PF3D7_1306400	RPT4	26S protease regulatory subunit 10B, putative						PF3D7_1314700	N/A	pinin/SDK/MemA domain-containing protein, putative
PF3D7_1342600	MyoA	myosin A						PF3D7_1033500	WDR70	WD repeat-containing protein 70, putative
PF3D7_1363500	CCR4-2	CCR4 domain-containing protein 2, putative						PF3D7_0526800	N/A	conserved Plasmodium protein, unknown function
PF3D7_0111800	N/A	eukaryotic translation initiation factor 4E, putative						PF3D7_1033200	ETRAMP10.2	early transcribed membrane protein 10.2
PF3D7_0206000	RAD2	DNA repair protein RAD2, putative						PF3D7_0905000	ATPTG4	ATP synthase-associated protein, putative
PF3D7_0217800	RPS26	40S ribosomal protein S26						PF3D7_0525800	IMC1g	inner membrane complex protein 1g, putative
PF3D7_0507600	CAF40	protein CAF40, putative						PF3D7_0408300	ZRANB2	zinc finger Ran-binding domain-containing protein 2, putative
PF3D7_0511500	N/A	RNA pseudouridylate synthase, putative						PF3D7_0305100	N/A	conserved Plasmodium protein, unknown function
PF3D7_0529800	N/A	conserved Plasmodium protein, unknown function						PF3D7_1470300	N/A	conserved Plasmodium protein, unknown function
PF3D7_0603100	N/A	RNA-binding protein, putative						PF3D7_1337900	N/A	conserved Plasmodium protein, unknown function
PF3D7_0726100	N/A	Plasmodium exported protein, unknown function						PF3D7_1345800	N/A	conserved Plasmodium protein, unknown function
PF3D7_0827000	DBP10	ATP-dependent RNA helicase DBP10, putative						PF3D7_1416100	SEY1	protein SEY1, putative
PF3D7_0829400	N/A	prolyl 4-hydroxylase subunit alpha, putative						PF3D7_0203100	N/A	protein kinase, putative
PF3D7_1123000	N/A	conserved Plasmodium protein, unknown function						PF3D7_0516400	PhLP1	phosducin-like protein 1, putative
PF3D7_1124300	N/A	conserved protein, unknown function						PF3D7_1348300	N/A	elongation factor Tu, putative
PF3D7_1127000	N/A	protein phosphatase, putative						PF3D7_0214700	N/A	conserved Plasmodium protein, unknown function
PF3D7_1205900	N/A	conserved protein, unknown function						PF3D7_1208800	N/A	zinc finger protein, putative
PF3D7_1251600	N/A	conserved Plasmodium protein, unknown function						PF3D7_1359000	N/A	conserved Plasmodium protein, unknown function
PF3D7_1302800	N/A	40S ribosomal protein S7, putative						PF3D7_1227500	SOC2	protein SOC2, putative
PF3D7_1330800	N/A	RNA-binding protein, putative						PF3D7_1416900	N/A	prefoldin subunit 2, putative
PF3D7_1359900	N/A	conserved Plasmodium membrane protein, unknown function						PF3D7_0729500	MT-A70	N6-adenosine-methyltransferase MT-A70
PF3D7_1362700	N/A	conserved Plasmodium protein, unknown function						PF3D7_0931400	N/A	PUB domain-containing protein, putative
PF3D7_1402300	RPN6	26S proteasome regulatory subunit RPN6						PF3D7_1329300	CAF1B	chromatin assembly factor 1 subunit B, putative
PF3D7_1419000	N/A	conserved Plasmodium protein, unknown function						PF3D7_0113700	HSP40	heat shock protein 40, type II
PF3D7_1437900	HSP40	HSP40, subfamily A						PF3D7_0312100	N/A	E3 ubiquitin-protein ligase
PF3D7_1439500	ORP2	oocyst rupture protein 2, putative						PF3D7_0825500	KRI1	protein KRI1, putative
PF3D7_1456500	N/A	STAG domain-containing protein, putative						PF3D7_0108500	N/A	ELM2 domain-containing protein, putative
PF3D7_1458500	SAS4	spindle assembly abnormal protein 4, putative						PF3D7_1306800	N/A	RED-like protein, putative
PF3D7_1459600	N/A	AP-4 complex accessory subunit Tepsin, putative						PF3D7_1349200	N/A	glutamate--tRNA ligase, putative
PF3D7_0510500	TopoI	topoisomerase I						PF3D7_1144600	TFG2	transcription initiation factor IIF subunit beta, putative
PF3D7_0529400	N/A	conserved Plasmodium protein, unknown function						PF3D7_1219600	ATP2	phospholipid-transporting ATPase 2
PF3D7_0927600	N/A	RNA-binding protein, putative						PF3D7_1364200	NUP205	nucleoporin NUP205, putative
PF3D7_1142300	N/A	conserved Plasmodium membrane protein, unknown function						PF3D7_0218600	N/A	patatin-like phospholipase, putative
PF3D7_1425900	N/A	protein HGH1, putative						PF3D7_1330800	N/A	RNA-binding protein, putative
PF3D7_0314700	RNF1	RING finger protein RNF1						PF3D7_0215800	ORC5	origin recognition complex subunit 5
PF3D7_0610900	SPT5	transcription elongation factor SPT5, putative						PF3D7_1344700	N/A	conserved Plasmodium protein, unknown function
PF3D7_0826700	RACK1	receptor for activated c kinase						PF3D7_1136000	N/A	conserved Plasmodium protein, unknown function
PF3D7_0827800	SET3	SET domain protein, putative						PF3D7_1222700	GAP45	glideosome-associated protein 45
PF3D7_1345600	N/A	inner membrane complex protein						PF3D7_0719300	ARP6	actin-related protein ARP6
PF3D7_1428500	N/A	protein kinase, putative						PF3D7_1030100	PRP22	pre-mRNA-splicing factor ATP-dependent RNA helicase PRP22, putative
PF3D7_1446500	NUP313	nucleoporin NUP313, putative						PF3D7_1347200	NT1	nucleoside transporter 1
PF3D7_0210900	N/A	conserved Plasmodium protein, unknown function						PF3D7_1337400	N/A	zinc finger protein, putative
PF3D7_0418700	N/A	RNA-binding protein NOB1, putative						PF3D7_1354300	N/A	large subunit rRNA methyltransferase, putative
PF3D7_0606000	KIC1	protein KIC1						PF3D7_0601900	N/A	conserved Plasmodium protein, unknown function
PF3D7_0932800	CSE1	importin alpha re-exporter, putative						PF3D7_1455700	N/A	conserved Plasmodium protein, unknown function
PF3D7_1117900	N/A	conserved Plasmodium protein, unknown function						PF3D7_0530000	N/A	conserved Plasmodium protein, unknown function
PF3D7_1205400	N/A	kelch domain-containing protein, putative						PF3D7_1035900	MAAP	merozoites-associated armadillo repeats protein
PF3D7_1221300	N/A	conserved Plasmodium protein, unknown function						PF3D7_0730200	N/A	AP-4 complex subunit beta, putative
PF3D7_1227400	N/A	conserved Plasmodium protein, unknown function						PF3D7_0930800	N/A	conserved Plasmodium membrane protein, unknown function
PF3D7_1317800	RPS19	40S ribosomal protein S19						PF3D7_0523900	N/A	MerC domain-containing protein, putative
PF3D7_1450100	SRP54	signal recognition particle subunit SRP54						PF3D7_1419400	N/A	conserved Plasmodium membrane protein, unknown function
PF3D7_1455700	N/A	conserved Plasmodium protein, unknown function						PF3D7_1304000	CAPH	condensin complex subunit 2, putative
PF3D7_0907300	N/A	prefoldin-like protein, putative						PF3D7_0723900	N/A	RNA-binding protein, putative
PF3D7_0923200	NOS	nitric oxide synthase, putative						PF3D7_1337500	N/A	conserved Plasmodium protein, unknown function
PF3D7_1125500	SNRPD1	small nuclear ribonucleoprotein Sm D1, putative						PF3D7_1142900	N/A	conserved Plasmodium protein, unknown function
PF3D7_1251200	N/A	coronin						PF3D7_0724100	N/A	conserved Plasmodium protein, unknown function
PF3D7_1357400	N/A	conserved Plasmodium protein, unknown function						PF3D7_0416400	HAT1	histone acetyltransferase, putative
PF3D7_1361200	N/A	conserved Plasmodium protein, unknown function						PF3D7_0517300	SR1	serine/arginine-rich splicing factor 1
PF3D7_1426800	N/A	conserved Plasmodium protein, unknown function						PF3D7_1450500	N/A	conserved Plasmodium protein, unknown function
PF3D7_0513200	N/A	CPSF domain-containing protein, putative						PF3D7_0820500	YIF1	protein transport protein YIF1, putative
PF3D7_0515700	GAP40	glideosome-associated protein 40, putative						PF3D7_0519500	CCR4-1	CCR4 domain-containing protein 1, putative
PF3D7_0524000	KASbeta	karyopherin beta						PF3D7_1424100	RPL5	60S ribosomal protein L5, putative
PF3D7_0612200	LRR6	leucine-rich repeat protein						PF3D7_1002200	PArt	tryptophan-rich antigen 3
PF3D7_0726500	N/A	ubiquitin carboxyl-terminal hydrolase, putative						PF3D7_0217800	RPS26	40S ribosomal protein S26
PF3D7_0802600	ACbeta	adenylyl cyclase beta						PF3D7_0415200	N/A	conserved Plasmodium protein, unknown function
PF3D7_0812700	SNRPC	U1 small nuclear ribonucleoprotein C, putative						PF3D7_1125800	N/A	kelch domain-containing protein, putative
PF3D7_0816000	RRB1	ribosome assembly protein RRB1, putative						PF3D7_0815600	EIF3G	eukaryotic translation initiation factor 3 subunit G, putative
PF3D7_0921600	N/A	tetratricopeptide repeat protein, putative						PF3D7_1027100	MPP10	U3 small nucleolar ribonucleoprotein protein MPP10, putative
PF3D7_1211300	MCM8	DNA helicase MCM8, putative						PF3D7_1334700	MSRP7	MSP7-like protein
PF3D7_1228100	LRR13	leucine-rich repeat protein						PF3D7_1318300	N/A	conserved Plasmodium protein, unknown function
PF3D7_1303700	N/A	tetratricopeptide repeat protein, putative						PF3D7_1111600	N/A	endonuclease/exonuclease/phosphatase family protein, putative
PF3D7_1310700	PIC5	PhIL1-interacting candidate PIC5						PF3D7_1013600	N/A	conserved Plasmodium protein, unknown function
PF3D7_1327300	N/A	conserved Plasmodium protein, unknown function						PF3D7_1423200	CYP52	peptidyl-prolyl cis-trans isomerase
PF3D7_1338700	N/A	conserved protein, unknown function						PF3D7_1133400	AMA1	apical membrane antigen 1
PF3D7_1366100	DIP13	DIP13 homolog, putative						PF3D7_1426800	N/A	conserved Plasmodium protein, unknown function
PF3D7_1412100	MCMBP	mini-chromosome maintenance complex-binding protein						PF3D7_1235100	N/A	conserved protein, unknown function
PF3D7_1414400	PP1	serine/threonine protein phosphatase PP1						PF3D7_0525200	SMC6	structural maintenance of chromosomes protein 6, putative
PF3D7_1424400	N/A	60S ribosomal protein L7-3, putative						PF3D7_0316900	N/A	E3 ubiquitin-protein ligase, putative
PF3D7_1437200	N/A	ribonucleoside-diphosphate reductase large subunit, putative						PF3D7_0809200	pfa55-14	asparagine-rich antigen Pfa55-14
PF3D7_1466900	N/A	conserved Plasmodium protein, unknown function						PF3D7_1033900	N/A	ubiquitin-conjugating enzyme E2, putative
PF3D7_0508300	TPT	triose phosphate transporter						PF3D7_0408200	N/A	conserved Plasmodium protein, unknown function
PF3D7_0611600	BTP1	basal complex transmembrane protein 1						PF3D7_0405700	N/A	lysine decarboxylase, putative
PF3D7_0702500	N/A	Plasmodium exported protein, unknown function						PF3D7_0418100	SOC1	protein SOC1, putative
PF3D7_1119700	N/A	conserved Plasmodium protein, unknown function						PF3D7_0527600	N/A	conserved Plasmodium protein, unknown function
PF3D7_1450400	N/A	E3 ubiquitin-protein ligase ZNF598, putative						PF3D7_0916700	HoMu	RNA-binding protein musashi, putative
PF3D7_1207100	N/A	pre-rRNA-processing protein ESF1, putative						PF3D7_1336200	N/A	conserved Plasmodium protein, unknown function
PF3D7_1322200	N/A	TOG domain-containing protein, putative						PF3D7_0416000	N/A	RNA-binding protein, putative
PF3D7_1334200	N/A	chaperone binding protein, putative						PF3D7_0908600	N/A	ribosomal RNA methyltransferase, putative
PF3D7_1435300	N/A	glutamate synthase [NADH], putative						PF3D7_0424700	FIKK4.2	serine/threonine protein kinase, FIKK family
PF3D7_0322100	Prt1	mRNA-capping enzyme subunit beta						PF3D7_0522600	N/A	magnesium transporter NIPA, putative
PF3D7_0935500	GEXP22	Plasmodium exported protein, unknown function						PF3D7_1019900	ATG8	autophagy-related protein 8
PF3D7_1144000	RPS21	40S ribosomal protein S21						PF3D7_1407900	PMI	plasmepsin I
PF3D7_0318700	N/A	conserved Plasmodium protein, unknown function						PF3D7_1252100	RON3	rhoptry neck protein 3
PF3D7_0501300	SBP1	skeleton-binding protein 1						PF3D7_0902200	FIKK9.3	serine/threonine protein kinase, FIKK family
PF3D7_0731100	PTP2	EMP1-trafficking protein						PF3D7_0606700	N/A	coatomer alpha subunit, putative
PF3D7_1119800	ASF1	alternative splicing factor ASF-1, putative						PF3D7_0817300	N/A	conserved Plasmodium protein, unknown function
PF3D7_1214900	N/A	conserved protein, unknown function						PF3D7_1361200	N/A	conserved Plasmodium protein, unknown function
PF3D7_1217900	N/A	PPPDE peptidase domain-containing protein, putative						PF3D7_0823200	N/A	RNA-binding protein, putative
PF3D7_1328000	N/A	conserved Plasmodium protein, unknown function						PF3D7_1317600	N/A	conserved Plasmodium protein, unknown function
PF3D7_0308900	SF3B1	splicing factor 3B subunit 1, putative						PF3D7_1458800	N/A	DNA-directed RNA polymerase III subunit RPC5, putative
PF3D7_0312400	GSK3	glycogen synthase kinase 3						PF3D7_1466800	N/A	NOC3 domain-containing protein, putative
PF3D7_0317300	N/A	conserved Plasmodium protein, unknown function						PF3D7_1466900	N/A	conserved Plasmodium protein, unknown function
PF3D7_0323700	SART1	U4/U6.U5 tri-snRNP-associated protein 1, putative						PF3D7_1222300	GRP94	endoplasmin, putative
PF3D7_0416200	N/A	PRKR-interacting protein 1, putative						PF3D7_0522100	N/A	conserved Plasmodium protein, unknown function
PF3D7_0603600	N/A	AT-rich interactive domain-containing protein, putative						PF3D7_1466300	RPN2	26S proteasome regulatory subunit RPN2, putative
PF3D7_0609900	N/A	conserved Plasmodium protein, unknown function						PF3D7_1322300	N/A	BRCT domain-containing protein, putative
PF3D7_0802100	AP2-LT	AP2 domain transcription factor AP2-LT						PF3D7_0810600	DBP1	ATP-dependent RNA helicase DBP1, putative
PF3D7_0804500	N/A	conserved Plasmodium membrane protein, unknown function						PF3D7_0809700	RUVB1	RuvB-like helicase 1
PF3D7_0819600	N/A	ubiquitin-like protein, putative						PF3D7_0318500	N/A	conserved Plasmodium protein, unknown function
PF3D7_0821800	SEC61B	protein transport protein SEC61 subunit beta, putative						PF3D7_1123400	ERF3	eukaryotic peptide chain release factor GTP-binding subunit, putative
PF3D7_1028600	N/A	conserved Plasmodium protein, unknown function						PF3D7_0527900	DDX41	ATP-dependent RNA helicase DDX41, putative
PF3D7_1216300	SRP19	signal recognition particle subunit SRP19						PF3D7_1217200	MRD1	multiple RNA-binding domain-containing protein 1, putative
PF3D7_1219000	FRM2	formin 2						PF3D7_1103700	CK2beta1	casein kinase II beta chain
PF3D7_1243900	DOC2	double C2-like domain-containing protein						PF3D7_1119900	SEC16	protein transport protein SEC16, putative
PF3D7_1251100	N/A	conserved Plasmodium protein, unknown function						PF3D7_0218200	N/A	SUZ domain-containing protein, putative
PF3D7_1307100	UTP6	U3 small nucleolar RNA-associated protein 6, putative						PF3D7_0526500	N/A	conserved Plasmodium protein, unknown function
PF3D7_1357500	N/A	DNA helicase, putative						PF3D7_0625000	SMS1	sphingomyelin synthase 1, putative
PF3D7_1359400	CELF1	CUGBP Elav-like family member 1						PF3D7_1466200	HDP1	homeodomain-like protein HDP1
PF3D7_1408500	N/A	conserved Plasmodium protein, unknown function						PF3D7_1104900	N/A	calcium/calmodulin-dependent protein kinase, putative
PF3D7_1417800	MCM2	DNA replication licensing factor MCM2						PF3D7_0627500	DJ1	protein DJ-1
PF3D7_1438000	N/A	eukaryotic translation initiation factor eIF2A, putative						PF3D7_0423600	N/A	conserved Plasmodium protein, unknown function
PF3D7_1438500	CPSF3	cleavage and polyadenylation specificity factor subunit 3, putative						PF3D7_1117700	RAN	GTP-binding nuclear protein RAN/TC4
PF3D7_1439100	N/A	DEAD/DEAH box helicase, putative						PF3D7_0317500	EG5	kinesin-5
PF3D7_1442300	tRIP	tRNA import protein tRIP						PF3D7_0308900	SF3B1	splicing factor 3B subunit 1, putative
PF3D7_1468400	D13	zinc finger protein, putative						PF3D7_1316800	SEC20	protein transport protein SEC20, putative
PF3D7_0203400	N/A	conserved protein, unknown function						PF3D7_1334200	N/A	chaperone binding protein, putative
PF3D7_0423600	N/A	conserved Plasmodium protein, unknown function						PF3D7_1146000	RSA4	ribosome assembly protein 4, putative
PF3D7_1319300	TRM1	tRNA (guanine(26)-N(2))-dimethyltransferase, putative						PF3D7_0201900	EMP3	erythrocyte membrane protein 3
PF3D7_0310500	DHX57	ATP-dependent RNA helicase DHX57, putative						PF3D7_0414900	ARO	armadillo-domain containing rhoptry protein
PF3D7_0317600	RPS11	40S ribosomal protein S11, putative						PF3D7_1421100	N/A	conserved Plasmodium protein, unknown function
PF3D7_0501800	CAF1A	chromatin assembly factor 1 subunit A						PF3D7_0522900	N/A	zinc finger protein, putative
PF3D7_0622900	AP2Tel	AP2 domain transcription factor AP2Tel						PF3D7_1302100	G27/25	gamete antigen 27/25
PF3D7_0503300	SRSF12	serine/arginine-rich splicing factor 12						PF3D7_1206800	N/A	conserved Plasmodium protein, unknown function
PF3D7_0831300	GEXP13	Plasmodium exported protein, unknown function						PF3D7_1035000	N/A	U2 snRNA/tRNA pseudouridine synthase, putative
PF3D7_0928300	N/A	conserved Plasmodium protein, unknown function						PF3D7_0520200	MED17	mediator of RNA polymerase II transcription subunit 17, putative
PF3D7_1001800	N/A	Plasmodium exported protein (PHISTc), unknown function						PF3D7_0617100	N/A	AP-2 complex subunit alpha, putative
PF3D7_1110100	N/A	conserved Plasmodium protein, unknown function						PF3D7_0605800	RAD50	DNA repair protein RAD50, putative
PF3D7_1201000	N/A	Plasmodium exported protein (PHISTb), unknown function						PF3D7_1119700	N/A	conserved Plasmodium protein, unknown function
PF3D7_1216900	N/A	DNA-binding chaperone, putative						PF3D7_0935900	REX1	ring-exported protein 1
PF3D7_1238800	ACS11	acyl-CoA synthetase						PF3D7_0802800	CNA	serine/threonine protein phosphatase 2B catalytic subunit A
PF3D7_0506700	N/A	GTPase-activating protein, putative						PF3D7_0917900	BIP	heat shock protein 70
PF3D7_0621100	N/A	conserved Plasmodium protein, unknown function						PF3D7_0821000	N/A	conserved Plasmodium protein, unknown function
PF3D7_0806800	N/A	V-type proton ATPase subunit a, putative						PF3D7_1360700	PIAS	E3 SUMO-protein ligase PIAS, putative
PF3D7_0918600	RECQ1	ATP-dependent DNA helicase Q1						PF3D7_0500800	MESA	mature parasite-infected erythrocyte surface antigen
PF3D7_0918700	N/A	conserved Plasmodium protein, unknown function						PF3D7_0709300	MED14	mediator of RNA polymerase II transcription subunit 14, putative
PF3D7_1035000	N/A	U2 snRNA/tRNA pseudouridine synthase, putative						PF3D7_1444800	FBPA	fructose-bisphosphate aldolase
PF3D7_1149100	N/A	Plasmodium exported protein, unknown function						PF3D7_0828300	N/A	conserved protein, unknown function
PF3D7_1349800	N/A	GPN-loop GTPase, putative						PF3D7_1318800	SEC63	translocation protein SEC63, putative
PF3D7_1365800	N/A	conserved Plasmodium protein, unknown function						PF3D7_1303700	N/A	tetratricopeptide repeat protein, putative
PF3D7_1414500	ABCk2	atypical protein kinase, ABC-1 family, putative						PF3D7_0922200	SAMS	S-adenosylmethionine synthetase
PF3D7_1414800	SMB1	small nuclear ribonucleoprotein-associated protein B, putative						PF3D7_1006800	GBP2	G-strand-binding protein 2
PF3D7_0420000	N/A	zinc finger protein, putative						PF3D7_1223200	N/A	nucleus export protein BRR6, putative
PF3D7_0516900	RPL2	60S ribosomal protein L2						PF3D7_1323800	VPS52	vacuolar protein sorting-associated protein 52, putative
PF3D7_0523000	MDR1	multidrug resistance protein 1						PF3D7_1012900	ATG18	autophagy-related protein 18
PF3D7_0614200	NAR1	cytosolic Fe-S cluster assembly factor NAR1, putative						PF3D7_0307100	RPS12	40S ribosomal protein S12, putative
PF3D7_0704800	PPM12	protein phosphatase PPM12, putative						PF3D7_0802100	AP2-LT	AP2 domain transcription factor AP2-LT
PF3D7_0721000	N/A	conserved Plasmodium membrane protein, unknown function						PF3D7_1307500	N/A	conserved Plasmodium protein, unknown function
PF3D7_0817200	N/A	conserved protein, unknown function						PF3D7_0312500	MFR3	multidrug-resistant modulator MFR3
PF3D7_0817300	N/A	conserved Plasmodium protein, unknown function						PF3D7_1002000	N/A	Plasmodium exported protein (hyp2), unknown function
PF3D7_0906300	N/A	Maf-like protein, putative						PF3D7_0802400	N/A	cyclin-like protein, putative
PF3D7_0907700	PA28	proteasome activator 28						PF3D7_0509500	N/A	ERCC4 domain-containing protein, putative
PF3D7_1033700	BDP1	bromodomain protein 1						PF3D7_0616600	N/A	conserved protein, unknown function
PF3D7_1112400	N/A	nucleic acid binding protein, putative						PF3D7_1448600	VTI1	SNARE protein, putative
PF3D7_1121000	DHHC3	palmitoyltransferase DHHC3						PF3D7_0827000	DBP10	ATP-dependent RNA helicase DBP10, putative
PF3D7_1209300	TRZ	telomere repeat-binding zinc finger protein						PF3D7_1328100	N/A	proteasome subunit beta type-7, putative
PF3D7_1225200	N/A	DNA-binding protein, putative						PF3D7_0216700	ATG11	autophagy-related protein 11, putative
PF3D7_1244200	TFB2	RNA polymerase II transcription factor B subunit 2, putative						PF3D7_0406200	Pfs16	parasitophorous vacuole membrane protein S16
PF3D7_1302700	N/A	ATP-dependent RNA helicase DHR1, putative						PF3D7_1006200	ALBA3	DNA/RNA-binding protein Alba 3
PF3D7_1308300	RPS27	40S ribosomal protein S27						PF3D7_1128000	N/A	conserved Plasmodium protein, unknown function
PF3D7_1321500	PDEbeta	3',5'-cyclic nucleotide phosphodiesterase beta						PF3D7_1364800	RPB5	DNA-directed RNA polymerases I, II, and III subunit RPABC1, putative
PF3D7_1337500	N/A	conserved Plasmodium protein, unknown function						PF3D7_0514900	N/A	conserved Plasmodium protein, unknown function
PF3D7_1365700	N/A	SNARE associated Golgi protein, putative						PF3D7_0706000	N/A	importin-7, putative
PF3D7_1402800	N/A	conserved Plasmodium protein, unknown function						PF3D7_0614900	N/A	conserved Plasmodium membrane protein, unknown function
PF3D7_1437500	N/A	conserved Plasmodium membrane protein, unknown function						PF3D7_0714300	DHHC4	palmitoyltransferase DHHC4, putative
PF3D7_1445400	CLK1	protein serine/threonine kinase-1						PF3D7_0516800	ApiAP2	AP2 domain transcription factor AP2-O2, putative
PF3D7_0524800	UFD1	ubiquitin fusion degradation protein 1, putative						PF3D7_0725000	N/A	exonuclease I, putative
PF3D7_1019100	N/A	conserved Plasmodium protein, unknown function						PF3D7_0831300	GEXP13	Plasmodium exported protein, unknown function
PF3D7_1309100	N/A	60S ribosomal protein L24, putative						PF3D7_1123200	LRR11	leucine-rich repeat protein
PF3D7_0716000	N/A	RNA-binding protein, putative						PF3D7_1008900	AK1	adenylate kinase
PF3D7_0815800	VPS9	vacuolar protein sorting-associated protein 9, putative						PF3D7_0813500	N/A	PUB domain-containing protein, putative
PF3D7_1128200	MBF1	multiprotein-bridging factor 1, putative						PF3D7_0309500	AS	asparagine synthetase [glutamine-hydrolyzing], putative
PF3D7_1449400	MUS81	crossover junction endonuclease MUS81, putative						PF3D7_0706400	RPL37	60S ribosomal protein L37
PF3D7_0111400	GEXP19	conserved Plasmodium protein, unknown function						PF3D7_0704000	N/A	conserved Plasmodium membrane protein, unknown function
PF3D7_0606700	N/A	coatomer alpha subunit, putative						PF3D7_1445200	MAK5	ATP-dependent RNA helicase MAK5, putative
PF3D7_0917500	N/A	conserved protein, unknown function						PF3D7_1417800	MCM2	DNA replication licensing factor MCM2
PF3D7_0922200	SAMS	S-adenosylmethionine synthetase						PF3D7_1313100	N/A	conserved Plasmodium protein, unknown function
PF3D7_1122400	N/A	conserved Plasmodium protein, unknown function						PF3D7_1359700	N/A	conserved Plasmodium protein, unknown function
PF3D7_1211700	MCM5	DNA replication licensing factor MCM5, putative						PF3D7_0602100	MTR4	ATP-dependent RNA helicase MTR4
PF3D7_1237400	N/A	hydrolase, putative						PF3D7_1019600	N/A	conserved Plasmodium protein, unknown function
PF3D7_1369700	SNRPA1	U2 small nuclear ribonucleoprotein A', putative						PF3D7_1338700	N/A	conserved protein, unknown function
PF3D7_1472200	HDA1	histone deacetylase, putative						PF3D7_1200700	ACS7	acyl-CoA synthetase
PF3D7_1211800	PfpUB	polyubiquitin						PF3D7_0827800	SET3	SET domain protein, putative
PF3D7_1224300	PABP1	polyadenylate-binding protein 1, putative						PF3D7_1031100	N/A	conserved Plasmodium protein, unknown function
PF3D7_1343100	N/A	conserved Plasmodium protein, unknown function						PF3D7_0414600	APH	acylated pleckstrin-homology domain-containing protein, putative
PF3D7_1466300	RPN2	26S proteasome regulatory subunit RPN2, putative						PF3D7_1136400	SRP72	signal recognition particle subunit SRP72, putative
PF3D7_0110600	PIP5K	phosphatidylinositol-4-phosphate 5-kinase						PF3D7_0416500	MAF1	repressor of RNA polymerase III transcription MAF1
PF3D7_0309000	YVH1	dual specificity protein phosphatase						PF3D7_0919100	N/A	DnaJ protein, putative
PF3D7_0317700	N/A	CPSF (cleavage and polyadenylation specific factor), subunit A, putative						PF3D7_1465900	N/A	40S ribosomal protein S3
PF3D7_0419800	N/A	60S ribosomal protein L7ae/L30e, putative						PF3D7_1031800	N/A	conserved protein, unknown function
PF3D7_0502000	VPS11	vacuolar protein sorting-associated protein 11, putative						PF3D7_1315300	N/A	conserved protein, unknown function
PF3D7_0507700	NPL4	nuclear protein localization protein 4, putative						PF3D7_1136300	TSN	tudor staphylococcal nuclease
PF3D7_0511000	TCTP	translationally-controlled tumor protein homolog						PF3D7_0505800	SUMO	small ubiquitin-related modifier
PF3D7_0616200	NDC80	kinetochore protein NDC80, putative						PF3D7_0519800	N/A	EELM2 domain-containing protein, putative
PF3D7_0706300	N/A	conserved Plasmodium protein, unknown function						PF3D7_1127600	N/A	CRAL/TRIO domain-containing protein, putative
PF3D7_0729400	N/A	ribosome biogenesis protein BRX1, putative						PF3D7_1401400	ETRAMP14	early transcribed membrane protein 14.1
PF3D7_0916000	MFS2	major facilitator superfamily domain-containing protein, putative						PF3D7_1249100	N/A	THUMP domain-containing protein, putative
PF3D7_0934800	PKAc	cAMP-dependent protein kinase catalytic subunit						PF3D7_0315800	N/A	zinc finger protein, putative
PF3D7_1103800	NOT1-G	CCR4-NOT transcription complex subunit NOT1-G, putative						PF3D7_1209000	N/A	mago-binding protein, putative
PF3D7_1111300	BOS1	protein transport protein BOS1, putative						PF3D7_1011200	BET1	BET1-like protein, putative
PF3D7_1120100	PGM1	phosphoglycerate mutase, putative						PF3D7_1109400	ENP1	essential nuclear protein 1, putative
PF3D7_1145300	CRIPT	cysteine-rich PDZ-binding protein, putative						PF3D7_1431300	LSG1	large subunit GTPase 1, putative
PF3D7_1224400	N/A	WD repeat-containing protein, putative						PF3D7_1409600	N/A	histidine phosphatase, putative
PF3D7_1229500	CCT3	T-complex protein 1 subunit gamma						PF3D7_1140700	N/A	chromo domain-containing protein, putative
PF3D7_1243600	N/A	translation initiation factor SUI1, putative						PF3D7_1202100	SRAP1	SRAP domain-containing protein, putative
PF3D7_1251800	N/A	conserved Plasmodium protein, unknown function						PF3D7_1120100	PGM1	phosphoglycerate mutase, putative
PF3D7_1332400	N/A	nucleotidyltransferase, putative						PF3D7_0603000	N/A	SDE2 domain-containing protein, putative
PF3D7_1345400	N/A	conserved Plasmodium protein, unknown function						PF3D7_1351400	N/A	60S ribosomal protein L17, putative
PF3D7_1460500	N/A	conserved Plasmodium protein, unknown function						PF3D7_1372400	ACS4	acyl-CoA synthetase
PF3D7_0608900	N/A	conserved Plasmodium protein, unknown function						PF3D7_0526400	N/A	conserved Plasmodium protein, unknown function
PF3D7_1235300	NOT4	CCR4-NOT transcription complex subunit 4, putative						PF3D7_1243700	N/A	ubiquitin-conjugating enzyme E2, putative
PF3D7_1246200	ACT1	actin I						PF3D7_1031600	GEXP15	protein GEXP15
PF3D7_1442900	ARFGEF	Sec7 domain-containing protein ARFGEF, putative						PF3D7_0218700	PRP45	pre-mRNA-processing protein 45, putative
PF3D7_0219400	N/A	ribosome associated membrane protein RAMP4, putative						PF3D7_0908300	N/A	conserved protein, unknown function
PF3D7_0312500	MFR3	multidrug-resistant modulator MFR3						PF3D7_0307600	N/A	conserved Plasmodium protein, unknown function
PF3D7_1227200	K1	potassium channel K1						PF3D7_0926400	N/A	monocarboxylate transporter, putative
PF3D7_1241400	N/A	RNA-binding protein, putative						PF3D7_0719500	CDC50A	LEM3/CDC50 family protein, putative
PF3D7_1246300	KIC4	protein KIC4						PF3D7_1452500	STX6	syntaxin-6, putative
PF3D7_0205800	PH1	PH domain-containing protein, putative						PF3D7_1342000	N/A	40S ribosomal protein S6
PF3D7_0211700	TKL1	tyrosine kinase-like protein, putative						PF3D7_1451100	eEF2	elongation factor 2
PF3D7_0411300	N/A	conserved Plasmodium protein, unknown function						PF3D7_0929200	N/A	RNA-binding protein, putative
PF3D7_0418300	N/A	conserved Plasmodium protein, unknown function						PF3D7_1122900	N/A	dynein heavy chain, putative
PF3D7_0703900	N/A	conserved Plasmodium membrane protein, unknown function						PF3D7_0821300	DHX36	ATP-dependent RNA helicase DHX36, putative
PF3D7_1119500	N/A	AP-4 complex subunit mu, putative						PF3D7_0212100	N/A	conserved Plasmodium protein, unknown function
PF3D7_1212900	BDP2	bromodomain protein 2, putative						PF3D7_0114100	MC-2TM	Pfmc-2TM Maurer's cleft two transmembrane protein
PF3D7_1223400	N/A	phospholipid-transporting ATPase, putative						PF3D7_0817900	HMGB2	high mobility group protein B2
PF3D7_1347700	ECT	ethanolamine-phosphate cytidylyltransferase						PF3D7_1342600	MyoA	myosin A
PF3D7_0214700	N/A	conserved Plasmodium protein, unknown function						PF3D7_1353100	N/A	Plasmodium exported protein, unknown function
PF3D7_0305100	N/A	conserved Plasmodium protein, unknown function						PF3D7_0711500	N/A	regulator of chromosome condensation, putative
PF3D7_0506200	TBP	TATA-box-binding protein						PF3D7_0316700	YOP1	protein YOP1, putative
PF3D7_0611400	SWIB	SWI/SNF-related matrix-associated actin-dependent regulator of chromatin						PF3D7_0424600	N/A	Plasmodium exported protein (PHISTb)
PF3D7_0628200	PK4	eukaryotic translation initiation factor 2-alpha kinase						PF3D7_0709700	PARE	prodrug activation and resistance esterase
PF3D7_0813500	N/A	PUB domain-containing protein, putative						PF3D7_1142500	RPL28	60S ribosomal protein L28
PF3D7_0932000	N/A	conserved Plasmodium protein, unknown function						PF3D7_1434500	N/A	dynein-related AAA-type ATPase, putative
PF3D7_0933500	N/A	gamma-tubulin complex component, putative						PF3D7_1472300	N/A	conserved protein, unknown function
PF3D7_1124800	RRS1	ribosome biogenesis regulatory protein, putative						PF3D7_0411900	N/A	DNA polymerase alpha catalytic subunit A
PF3D7_1149600	N/A	DnaJ protein, putative						PF3D7_0112200	MRP1	multidrug resistance-associated protein 1
PF3D7_1304000	CAPH	condensin complex subunit 2, putative						PF3D7_0509400	RNAPI	RNA polymerase I
PF3D7_1313700	N/A	Maf-like protein, putative						PF3D7_1326300	N/A	RNA-binding protein, putative
PF3D7_1422300	N/A	DnaJ protein, putative						PF3D7_1354900	N/A	conserved Plasmodium protein, unknown function
PF3D7_1443800	CWC24	pre-mRNA-splicing factor CWC24, putative						PF3D7_1123000	N/A	conserved Plasmodium protein, unknown function
PF3D7_1448700	N/A	HSP20-like chaperone, putative						PF3D7_1417300	ATG4	cysteine protease ATG4, putative
PF3D7_1466200	HDP1	homeodomain-like protein HDP1						PF3D7_1417500	CBF5	H/ACA ribonucleoprotein complex subunit 4, putative
PF3D7_0323100	N/A	conserved Plasmodium protein, unknown function						PF3D7_1468800	U2AF2	splicing factor U2AF large subunit, putative
PF3D7_0503600	MyoB	myosin B						PF3D7_1013500	PI-PLC	phosphoinositide-specific phospholipase C
PF3D7_0601600	N/A	tetratricopeptide repeat protein, putative						PF3D7_1348600	N/A	conserved Plasmodium protein, unknown function
PF3D7_0631000	N/A	tetratricopeptide repeat protein, putative						PF3D7_0609800	DHHC2	palmitoyltransferase DHHC2, putative
PF3D7_0403800	N/A	alpha/beta hydrolase, putative						PF3D7_1010300	SDH4	succinate dehydrogenase subunit 4, putative
PF3D7_0814200	ALBA1	DNA/RNA-binding protein Alba 1						PF3D7_0102500	EBA181	erythrocyte binding antigen-181
PF3D7_1436000	GPI	glucose-6-phosphate isomerase						PF3D7_0102600	FIKK1	serine/threonine protein kinase, FIKK family
PF3D7_1424100	RPL5	60S ribosomal protein L5, putative						PF3D7_0103100	VPS51	vacuolar protein sorting-associated protein 51, putative
PF3D7_0630600	N/A	deubiquitinating enzyme MINDY, putative						PF3D7_0103900	PIESP15	parasite-infected erythrocyte surface protein
PF3D7_0726300	PMS1	DNA mismatch repair protein PMS1, putative						PF3D7_0104100	N/A	protein E140, putative
PF3D7_0931400	N/A	PUB domain-containing protein, putative						PF3D7_0105600	N/A	FtsJ-like methyltransferase, putative
PF3D7_1308100	N/A	CCAAT-binding transcription factor, putative						PF3D7_0105800	N/A	cyclin-dependent kinases regulatory subunit, putative
PF3D7_1341200	N/A	60S ribosomal protein L18, putative						PF3D7_0106100	N/A	V-type proton ATPase subunit C, putative
PF3D7_1429600	GEXP03	conserved Plasmodium protein, unknown function						PF3D7_0106400	N/A	pre-rRNA-processing protein TSR2, putative
PF3D7_1445900	DDX17	ATP-dependent RNA helicase DDX17						PF3D7_0107800	MRE11	double-strand break repair protein MRE11
PF3D7_1458000	FP1	cysteine proteinase falcipain 1						PF3D7_0107900	N/A	conserved Plasmodium protein, unknown function
PF3D7_0106700	AARP2	small ribosomal subunit assembling AARP2 protein						PF3D7_0108700	PSOP24	secreted ookinete protein, putative
PF3D7_0306100	N/A	conserved Plasmodium protein, unknown function						PF3D7_0110400	RPB9	DNA-directed RNA polymerase II subunit RPB9, putative
PF3D7_0315100	eIF4E	eukaryotic translation initiation factor 4E						PF3D7_0110500	BDP3	bromodomain protein 3, putative
PF3D7_0606100	N/A	RNA-binding protein, putative						PF3D7_0111000	N/A	kinesin-8B, putative
PF3D7_0730300	ApiAP2	AP2 domain transcription factor AP2-L, putative						PF3D7_0111400	GEXP19	conserved Plasmodium protein, unknown function
PF3D7_0808100	N/A	AP-3 complex subunit delta, putative						PF3D7_0111600	N/A	conserved Plasmodium protein, unknown function
PF3D7_0829000	N/A	conserved Plasmodium membrane protein, unknown function						PF3D7_0111800	N/A	eukaryotic translation initiation factor 4E, putative
PF3D7_1126800	SR-MG	alternative splicing factor SR-MG, putative						PF3D7_0113000	GARP	glutamic acid-rich protein GARP
PF3D7_1136500	CK1	casein kinase 1						PF3D7_0113100	SURF1.1	surface-associated interspersed protein 1.1 (SURFIN 1.1)
PF3D7_1241200	N/A	conserved Plasmodium protein, unknown function						PF3D7_0113900	CBP1	CX3CL1-binding protein 1
PF3D7_1251500	DRS1	ATP-dependent RNA helicase DRS1, putative						PF3D7_0114000	EPF1	exported protein family 1
PF3D7_1458800	N/A	DNA-directed RNA polymerase III subunit RPC5, putative						PF3D7_0201500	N/A	Plasmodium exported protein (hyp9), unknown function
PF3D7_0204300	N/A	conserved Plasmodium protein, unknown function						PF3D7_0201700	N/A	DnaJ protein, putative
PF3D7_1231800	N/A	asparagine-rich protein, putative						PF3D7_0202200	PTP1	EMP1-trafficking protein
PF3D7_1345800	N/A	conserved Plasmodium protein, unknown function						PF3D7_0203200	N/A	conserved Plasmodium protein, unknown function
PF3D7_1428300	N/A	proliferation-associated protein 2g4, putative						PF3D7_0203400	N/A	conserved protein, unknown function
PF3D7_1308900	DCP2	mRNA-decapping enzyme 2, putative						PF3D7_0204100	N/A	Sel1 repeat-containing protein, putative
PF3D7_1358900	N/A	GTP-binding protein, putative						PF3D7_0204200	SEC66	translocation protein SEC66, putative
PF3D7_1427900	N/A	leucine-rich repeat protein						PF3D7_0204500	AspAT	aspartate transaminase
PF3D7_0107500	NCR1	Niemann-Pick type C1-related protein						PF3D7_0205800	PH1	PH domain-containing protein, putative
PF3D7_0706000	N/A	importin-7, putative						PF3D7_0205900	RPN1	26S proteasome regulatory subunit RPN1, putative
PF3D7_1343300	N/A	CDT1-like protein, putative						PF3D7_0206500	N/A	conserved Plasmodium protein, unknown function
PF3D7_0416800	SAR1	small GTP-binding protein sar1						PF3D7_0206900	MSP5	merozoite surface protein 5
PF3D7_0512600	RAB1b	ras-related protein Rab-1B						PF3D7_0208200	KRR1	KRR1 small subunit processome component, putative
PF3D7_0609300	N/A	conserved Plasmodium protein, unknown function						PF3D7_0208300	N/A	conserved Plasmodium protein, unknown function
PF3D7_0917700	N/A	GPN-loop GTPase, putative						PF3D7_0208500	ACP	acyl carrier protein
PF3D7_0932100	N/A	protein MAM3, putative						PF3D7_0209500	N/A	conserved Plasmodium protein, unknown function
PF3D7_1353200	MAHRP2	membrane associated histidine-rich protein 2						PF3D7_0209600	N/A	transporter, putative
PF3D7_1465300	N/A	ribonuclease Z, putative						PF3D7_0210200	N/A	conserved Plasmodium protein, unknown function
PF3D7_0105200	N/A	heptatricopeptide repeat and RAP domain-containing protein, putative						PF3D7_0210300	N/A	monocarboxylate transporter, putative
PF3D7_0305200	N/A	GRIP domain-containing protein, putative						PF3D7_0211200	RAB5a	ras-related protein Rab-5A
PF3D7_0307600	N/A	conserved Plasmodium protein, unknown function						PF3D7_0211700	TKL1	tyrosine kinase-like protein, putative
PF3D7_0407300	N/A	transcription factor, putative						PF3D7_0211800	AsnRS	asparagine--tRNA ligase
PF3D7_0613500	N/A	AP-3 complex subunit beta, putative						PF3D7_0212300	ERF1	eukaryotic peptide chain release factor subunit 1, putative
PF3D7_0626400	N/A	CRAL/TRIO domain-containing protein, putative						PF3D7_0212900	ATEL1	arginyl-tRNA--protein transferase
PF3D7_0709600	POP1	ribonucleases P/MRP protein subunit POP1, putative						PF3D7_0213700	N/A	conserved protein, unknown function
PF3D7_0904600	N/A	ubiquitin specific protease, putative						PF3D7_0214000	CCT8	T-complex protein 1 subunit theta
PF3D7_0930400	N/A	zinc finger protein, putative						PF3D7_0214900	RON6	rhoptry neck protein 6
PF3D7_1015300	METAP1b	methionine aminopeptidase 1b, putative						PF3D7_0215200	N/A	conserved Plasmodium protein, unknown function
PF3D7_1131800	N/A	oxysterol-binding protein, putative						PF3D7_0215300	ACS8	acyl-CoA synthetase
PF3D7_1219100	CHC	clathrin heavy chain, putative						PF3D7_0215700	RPB2	DNA-directed RNA polymerase II subunit RPB2, putative
PF3D7_1332000	SYN5	syntaxin, Qa-SNARE family						PF3D7_0216400	VPS45	vacuolar protein sorting-associated protein 45
PF3D7_1425800	N/A	conserved Plasmodium protein, unknown function						PF3D7_0216600	N/A	sugar transporter, putative
PF3D7_1452500	STX6	syntaxin-6, putative						PF3D7_0216800	N/A	TMEM121 domain-containing protein, putative
PF3D7_0520200	MED17	mediator of RNA polymerase II transcription subunit 17, putative						PF3D7_0217700	N/A	E2F-associated phosphoprotein, putative
PF3D7_1407900	PMI	plasmepsin I						PF3D7_0219200	RPS30	40S ribosomal protein S30
PF3D7_0308200	CCT7	T-complex protein 1 subunit eta						PF3D7_0219400	N/A	ribosome associated membrane protein RAMP4, putative
PF3D7_0820500	YIF1	protein transport protein YIF1, putative						PF3D7_0219700	GEXP20	Plasmodium exported protein (PHISTc), unknown function
PF3D7_1318300	N/A	conserved Plasmodium protein, unknown function						PF3D7_0220000	LSA3	liver stage antigen 3
PF3D7_1471400	N/A	diacylglycerol kinase, putative						PF3D7_0220100	N/A	DnaJ protein, putative
PF3D7_0110400	RPB9	DNA-directed RNA polymerase II subunit RPB9, putative						PF3D7_0220800	CLAG2	cytoadherence linked asexual protein 2
PF3D7_0806500	N/A	DnaJ protein, putative						PF3D7_0221200	N/A	Plasmodium exported protein (hyp15), unknown function
PF3D7_1030100	PRP22	pre-mRNA-splicing factor ATP-dependent RNA helicase PRP22, putative						PF3D7_0221700	N/A	Plasmodium exported protein, unknown function
PF3D7_0704600	UT	HECT-type E3 ubiquitin ligase UT						PF3D7_0222100	MC-2TM	Pfmc-2TM Maurer's cleft two transmembrane protein
PF3D7_1026600	N/A	conserved Plasmodium protein, unknown function						PF3D7_0301700	N/A	Plasmodium exported protein, unknown function
PF3D7_1209400	CIA1	cytosolic iron-sulfur protein assembly protein 1, putative						PF3D7_0302000	PRP46	pre-mRNA-splicing factor PRP46, putative
PF3D7_1241900	N/A	tetratricopeptide repeat protein, putative						PF3D7_0302200	CLAG3.2	cytoadherence linked asexual protein 3.2
PF3D7_0623600	N/A	splicing factor-like protein 1, putative						PF3D7_0302500	CLAG3.1	cytoadherence linked asexual protein 3.1
PF3D7_0803200	N/A	filament assembling protein, putative						PF3D7_0302600	ABCB4	ABC transporter B family member 4, putative
PF3D7_0812400	KARalpha	karyopherin alpha						PF3D7_0303000	NSF	N-ethylmaleimide-sensitive fusion protein
PF3D7_0824800	N/A	conserved Plasmodium membrane protein, unknown function						PF3D7_0304000	IMC1a	inner membrane complex protein 1a, putative
PF3D7_1008800	NOP5	nucleolar protein 5, putative						PF3D7_0304200	EHD	EH domain-containing protein
PF3D7_1138000	N/A	conserved Plasmodium protein, unknown function						PF3D7_0304400	RPL44	60S ribosomal protein L44
PF3D7_1208800	N/A	zinc finger protein, putative						PF3D7_0304800	N/A	conserved Plasmodium membrane protein, unknown function
PF3D7_1232300	N/A	cytochrome b5, putative						PF3D7_0305300	N/A	transporter, putative
PF3D7_1362200	RUVB3	RuvB-like helicase 3						PF3D7_0305700	N/A	ubiquitin-conjugating enzyme MMS2, putative
PF3D7_1132300	N/A	nucleic acid binding protein, putative						PF3D7_0306100	N/A	conserved Plasmodium protein, unknown function
PF3D7_1203700	NAPL	nucleosome assembly protein						PF3D7_0306700	EMC5	ER membrane protein complex subunit 5, putative
PF3D7_1238100	N/A	calcyclin binding protein, putative						PF3D7_0306800	CCT2	T-complex protein 1 subunit beta
PF3D7_1335000	MSRP1	MSP7-like protein						PF3D7_0306900	N/A	40S ribosomal protein S23, putative
PF3D7_1407800	PM4	plasmepsin IV						PF3D7_0309600	PfP2	60S acidic ribosomal protein P2
PF3D7_1418900	DBP4	ATP-dependent RNA helicase DBP4, putative						PF3D7_0310500	DHX57	ATP-dependent RNA helicase DHX57, putative
PF3D7_1431300	LSG1	large subunit GTPase 1, putative						PF3D7_0310600	EIF3K	eukaryotic translation initiation factor 3 subunit K, putative
PF3D7_1447800	N/A	calponin homology domain-containing protein, putative						PF3D7_0314200	N/A	conserved Plasmodium protein, unknown function
PF3D7_0305600	APE1	DNA-(apurinic or apyrimidinic site) endonuclease						PF3D7_0314400	PPP6	serine/threonine protein phosphatase 6, putative
PF3D7_0415800	N/A	PhIL1-interacting candidate PIC3						PF3D7_0314600	N/A	conserved protein, unknown function
PF3D7_0423400	AARP	apical asparagine-rich protein AARP						PF3D7_0314800	N/A	conserved Plasmodium protein, unknown function
PF3D7_0508900	AAP6	protein AAP6						PF3D7_0315100	eIF4E	eukaryotic translation initiation factor 4E
PF3D7_0708000	N/A	cytoskeleton associated protein, putative						PF3D7_0315600	N/A	zinc finger protein, putative
PF3D7_0807300	RAB18	ras-related protein Rab-18						PF3D7_0316200	N/A	conserved Plasmodium protein, unknown function
PF3D7_0904100	N/A	AP-4 complex subunit epsilon, putative						PF3D7_0316300	PPase	inorganic pyrophosphatase
PF3D7_1103600	ALP2a	actin-like protein, putative						PF3D7_0316800	N/A	40S ribosomal protein S15A, putative
PF3D7_1148000	N/A	serine/threonine protein kinase, putative						PF3D7_0317400	N/A	DNA replication complex GINS protein, putative
PF3D7_1318800	SEC63	translocation protein SEC63, putative						PF3D7_0317600	RPS11	40S ribosomal protein S11, putative
PF3D7_1353100	N/A	Plasmodium exported protein, unknown function						PF3D7_0317900	N/A	conserved protein, unknown function
PF3D7_1366700	N/A	conserved Plasmodium protein, unknown function						PF3D7_0319200	CCR4-4	CCR4 domain-containing protein 4, putative
PF3D7_1420100	N/A	conserved Plasmodium protein, unknown function						PF3D7_0319400	N/A	kinesin-8X
PF3D7_0104800	NPT1	novel putative transporter 1, putative						PF3D7_0319500	N/A	RNA-binding protein, putative
PF3D7_0813600	N/A	translation initiation factor SUI1, putative						PF3D7_0319700	ABCI3	ABC transporter I family member 1, putative
PF3D7_0933000	N/A	CSTF domain-containing protein, putative						PF3D7_0320100	SEC22	protein transport protein SEC22
PF3D7_0935600	GIG	gametocytogenesis-implicated protein						PF3D7_0320800	DOZI	ATP-dependent RNA helicase DDX6
PF3D7_1107200	N/A	conserved protein, unknown function						PF3D7_0320900	H2A.Z	histone H2A.Z
PF3D7_1203000	ORC1	origin recognition complex subunit 1						PF3D7_0321000	N/A	conserved protein, unknown function
PF3D7_1227500	SOC2	protein SOC2, putative						PF3D7_0321500	N/A	peptidase, putative
PF3D7_1320600	RAB11a	ras-related protein Rab-11A						PF3D7_0321700	N/A	conserved Plasmodium protein, unknown function
PF3D7_1322100	SET2	histone-lysine N-methyltransferase SET2						PF3D7_0321900	CARL	cyclic amine resistance locus protein
PF3D7_1322300	N/A	BRCT domain-containing protein, putative						PF3D7_0322000	CYP19A	peptidyl-prolyl cis-trans isomerase
PF3D7_1330400	N/A	ER lumen protein retaining receptor 1, putative						PF3D7_0322100	Prt1	mRNA-capping enzyme subunit beta
PF3D7_1414300	N/A	60S ribosomal protein L10, putative						PF3D7_0322400	N/A	regulator of initiation factor 2 (eIF2)
PF3D7_1426600	N/A	conserved Plasmodium protein, unknown function						PF3D7_0323000	TMA7	translation machinery-associated protein 7, putative
PF3D7_1004000	N/A	60S ribosomal protein L13, putative						PF3D7_0323100	N/A	conserved Plasmodium protein, unknown function
PF3D7_0710200	N/A	conserved Plasmodium protein, unknown function						PF3D7_0323500	SMN	survival motor neuron-like protein
PF3D7_0725000	N/A	exonuclease I, putative						PF3D7_0323800	N/A	conserved Plasmodium protein, unknown function
PF3D7_1218300	AP2-MU	AP-2 complex subunit mu						PF3D7_0324800	RIF	rifin
PF3D7_1218900	N/A	WD repeat-containing protein, putative						PF3D7_0400400	VAR	erythrocyte membrane protein 1, PfEMP1
PF3D7_1228400	N/A	conserved Plasmodium protein, unknown function						PF3D7_0402100	N/A	Plasmodium exported protein (PHISTb), unknown function
PF3D7_1410600	eIF2gamma	eukaryotic translation initiation factor 2 subunit gamma, putative						PF3D7_0403200	N/A	pre-mRNA splicing factor, putative
PF3D7_1413700	N/A	DET1 domain-containing protein, putative						PF3D7_0403400	N/A	conserved Plasmodium protein, unknown function
PF3D7_0505000	N/A	MMS19-like protein, putative						PF3D7_0403700	CLF1	pre-mRNA-splicing factor CLF1, putative
PF3D7_0519700	N/A	FoP domain-containing protein, putative						PF3D7_0404300	N/A	conserved Plasmodium protein, unknown function
PF3D7_0730800	N/A	Plasmodium exported protein, unknown function						PF3D7_0404600	N/A	conserved Plasmodium membrane protein, unknown function
PF3D7_0927200	N/A	zinc finger protein, putative						PF3D7_0404900	P41	6-cysteine protein P41
PF3D7_1346100	SEC61A	protein transport protein SEC61 subunit alpha						PF3D7_0405200	CERLI2	protein CERLI2
PF3D7_1452000	RON2	rhoptry neck protein 2						PF3D7_0405600	N/A	TMEM33 domain-containing protein, putative
PF3D7_0411000	N/A	conserved Plasmodium protein, unknown function						PF3D7_0406000	N/A	conserved protein, unknown function
PF3D7_0418100	SOC1	protein SOC1, putative						PF3D7_0406100	N/A	V-type proton ATPase subunit B
PF3D7_0503200	CDC6	cell division control protein 6, putative						PF3D7_0406500	N/A	NYN domain-containing protein, putative
PF3D7_0602600	N/A	SAC3 domain-containing protein, putative						PF3D7_0406900	N/A	conserved Plasmodium protein, unknown function
PF3D7_0615900	N/A	protein phosphatase, putative						PF3D7_0407000	N/A	conserved Plasmodium protein, unknown function
PF3D7_0625800	N/A	conserved Plasmodium protein, unknown function						PF3D7_0407300	N/A	transcription factor, putative
PF3D7_0729300	NMD3	60S ribosomal export protein NMD3, putative						PF3D7_0407600	N/A	conserved Plasmodium protein, unknown function
PF3D7_1005600	N/A	DnaJ protein, putative						PF3D7_0407900	N/A	AAA family ATPase, putative
PF3D7_1008900	AK1	adenylate kinase						PF3D7_0408100	N/A	conserved Plasmodium protein, unknown function
PF3D7_1012700	NIF4	NLI interacting factor-like phosphatase, putative						PF3D7_0409700	RF2	peptide chain release factor 2
PF3D7_1026000	N/A	conserved Plasmodium protein, unknown function						PF3D7_0410300	PPM1	protein phosphatase PPM1, putative
PF3D7_1130400	RPT5	26S protease regulatory subunit 6A, putative						PF3D7_0410500	N/A	conserved Plasmodium protein, unknown function
PF3D7_1248700	N/A	conserved protein, unknown function						PF3D7_0411000	N/A	conserved Plasmodium protein, unknown function
PF3D7_1304400	N/A	PUB domain-containing protein, putative						PF3D7_0411100	MED8	mediator of RNA polymerase II transcription subunit 8, putative
PF3D7_1319600	N/A	ACDC domain-containing protein, putative						PF3D7_0412700	VAR	erythrocyte membrane protein 1, PfEMP1
PF3D7_1423300	PP7	serine/threonine protein phosphatase 7						PF3D7_0412900	VAR	erythrocyte membrane protein 1, PfEMP1
PF3D7_1436600	PKG	cGMP-dependent protein kinase						PF3D7_0413100	VAR	erythrocyte membrane protein 1, PfEMP1
PF3D7_1468100	MORC	MORC family protein						PF3D7_0413700	N/A	lysine decarboxylase-like protein, putative
PF3D7_0811400	N/A	conserved protein, unknown function						PF3D7_0414400	N/A	conserved Plasmodium protein, unknown function
PF3D7_1339300	N/A	conserved protein, unknown function						PF3D7_0415800	N/A	PhIL1-interacting candidate PIC3
PF3D7_1209500	PDEalpha	cGMP-specific 3',5'-cyclic phosphodiesterase alpha						PF3D7_0415900	N/A	60S ribosomal protein L15, putative
PF3D7_0320100	SEC22	protein transport protein SEC22						PF3D7_0416300	MCM9	DNA helicase MCM9, putative
PF3D7_1025500	N/A	conserved Plasmodium protein, unknown function						PF3D7_0416800	SAR1	small GTP-binding protein sar1
PF3D7_1234500	N/A	conserved Plasmodium protein, unknown function						PF3D7_0416900	N/A	conserved Plasmodium protein, unknown function
PF3D7_1334100	N/A	conserved protein, unknown function						PF3D7_0418300	N/A	conserved Plasmodium protein, unknown function
PF3D7_1360900	N/A	RNA-binding protein, putative						PF3D7_0418500	BET3	trafficking protein particle complex subunit 3, putative
PF3D7_0415300	CRK3	cdc2-related protein kinase 3						PF3D7_0418700	N/A	RNA-binding protein NOB1, putative
PF3D7_0920000	ELO3	elongation of fatty acids protein, putative						PF3D7_0419500	N/A	conserved Plasmodium membrane protein, unknown function
PF3D7_1203400	MFS4	major facilitator superfamily domain-containing protein, putative						PF3D7_0419600	RANBP1	ran-specific GTPase-activating protein 1, putative
PF3D7_1244700	N/A	conserved protein, unknown function						PF3D7_0419900	N/A	phosphatidylinositol 4-kinase, putative
PF3D7_1357000	N/A	elongation factor 1-alpha						PF3D7_0422200	N/A	erythrocyte membrane-associated antigen
PF3D7_1357100	N/A	elongation factor 1-alpha						PF3D7_0422700	EIF4A3	eukaryotic initiation factor 4A-III, putative
PF3D7_1448000	UTP12	U3 small nucleolar RNA-associated protein 12, putative						PF3D7_0423400	AARP	apical asparagine-rich protein AARP
PF3D7_0417800	CRK1	cdc2-related protein kinase 1						PF3D7_0424500	FIKK4.1	serine/threonine protein kinase, FIKK family
PF3D7_0419500	N/A	conserved Plasmodium membrane protein, unknown function						PF3D7_0501200	PIESP2	parasite-infected erythrocyte surface protein
PF3D7_0518500	DDX23	ATP-dependent RNA helicase DDX23, putative						PF3D7_0501600	RAP2	rhoptry-associated protein 2
PF3D7_0606600	N/A	conserved Plasmodium protein, unknown function						PF3D7_0502000	VPS11	vacuolar protein sorting-associated protein 11, putative
PF3D7_0717700	N/A	serine--tRNA ligase, putative						PF3D7_0502300	N/A	conserved Plasmodium protein, unknown function
PF3D7_0722200	RALP1	rhoptry-associated leucine zipper-like protein 1						PF3D7_0503400	ADF1	actin-depolymerizing factor 1
PF3D7_0728100	N/A	anaphase-promoting complex subunit 1, putative						PF3D7_0503500	N/A	protein kinase, putative
PF3D7_0830500	TryThrA	sporozoite and liver stage tryptophan-rich protein, putative						PF3D7_0503600	MyoB	myosin B
PF3D7_0909400	N/A	exoribonuclease, putative						PF3D7_0505900	MED11	mediator of RNA polymerase II transcription subunit 11, putative
PF3D7_0914100	N/A	conserved Plasmodium protein, unknown function						PF3D7_0506100	N/A	60S ribosomal subunit protein L24, putative
PF3D7_0926500	N/A	tetratricopeptide repeat protein, putative						PF3D7_0506200	TBP	TATA-box-binding protein
PF3D7_1203900	UBC	ubiquitin-conjugating enzyme E2						PF3D7_0506700	N/A	GTPase-activating protein, putative
PF3D7_1229300	PIC1	PhIL1-interacting candidate PIC1						PF3D7_0507700	NPL4	nuclear protein localization protein 4, putative
PF3D7_1329300	CAF1B	chromatin assembly factor 1 subunit B, putative						PF3D7_0508300	TPT	triose phosphate transporter
PF3D7_1347500	ALBA4	DNA/RNA-binding protein Alba 4						PF3D7_0508600	N/A	conserved protein, unknown function
PF3D7_1359000	N/A	conserved Plasmodium protein, unknown function						PF3D7_0509100	SMC4	structural maintenance of chromosomes protein 4, putative
PF3D7_1415400	N/A	Btz domain-containing protein, putative						PF3D7_0509900	N/A	NSE4 domain-containing protein, putative
PF3D7_1429200	ApiAP2	AP2 domain transcription factor AP2-O3, putative						PF3D7_0510200	CYP87	peptidyl-prolyl cis-trans isomerase
PF3D7_1429400	N/A	rRNA (adenosine-2'-O-)-methyltransferase, putative						PF3D7_0510500	TopoI	topoisomerase I
PF3D7_1457400	N/A	conserved Plasmodium protein, unknown function						PF3D7_0511000	TCTP	translationally-controlled tumor protein homolog
PF3D7_1462400	N/A	conserved Plasmodium protein, unknown function						PF3D7_0511300	N/A	MORN repeat protein, putative
PF3D7_1305600	S2P	site-2 protease S2P, putative						PF3D7_0511800	INO1	inositol-3-phosphate synthase
PF3D7_0728900	N/A	RNA-binding protein, putative						PF3D7_0512000	PFD6	prefoldin subunit 6
PF3D7_0804300	N/A	zinc finger protein, putative						PF3D7_0512300	MAT1	CDK-activating kinase assembly factor MAT1
PF3D7_1133100	N/A	conserved Plasmodium protein, unknown function						PF3D7_0512600	RAB1b	ras-related protein Rab-1B
PF3D7_0509400	RNAPI	RNA polymerase I						PF3D7_0513200	N/A	CPSF domain-containing protein, putative
PF3D7_0527500	HIP	Hsc70-interacting protein						PF3D7_0513300	PNP	purine nucleoside phosphorylase
PF3D7_0813300	N/A	NPL domain-containing protein, putative						PF3D7_0513800	RAB1a	ras-related protein Rab-1A
PF3D7_1036800	ACT	acetyl-CoA transporter, putative						PF3D7_0514100	UvrD	ATP-dependent DNA helicase UvrD
PF3D7_1306300	N/A	SAM dependent methyltransferase, putative						PF3D7_0515000	CWC2	pre-mRNA-splicing factor CWC2, putative
PF3D7_1312100	N/A	GYF domain-containing protein, putative						PF3D7_0515600	GEP	gamete egress protein GEP, putative
PF3D7_1320200	N/A	TBC domain protein, putative						PF3D7_0515900	NIF2	NLI interacting factor-like phosphatase, putative
PF3D7_1439900	TIM	triosephosphate isomerase						PF3D7_0516200	RPS11	40S ribosomal protein S11
PF3D7_0103200	NT4	nucleoside transporter 4						PF3D7_0516500	MFS1	major facilitator superfamily domain-containing protein, putative
PF3D7_0113100	SURF1.1	surface-associated interspersed protein 1.1 (SURFIN 1.1)						PF3D7_0516900	RPL2	60S ribosomal protein L2
PF3D7_0203600	N/A	conserved Plasmodium protein, unknown function						PF3D7_0517000	N/A	60S ribosomal protein L12, putative
PF3D7_1029100	N/A	conserved Plasmodium protein, unknown function						PF3D7_0518600	WDR26	WD repeat-containing protein 26, putative
PF3D7_1328200	N/A	conserved Plasmodium protein, unknown function						PF3D7_0518900	N/A	conserved protein, unknown function
PF3D7_1358500	N/A	zinc finger protein, putative						PF3D7_0519400	RPS24	40S ribosomal protein S24
PF3D7_1454700	6PGD	6-phosphogluconate dehydrogenase, decarboxylating						PF3D7_0519600	N/A	zinc finger protein, putative
PF3D7_1464700	N/A	ATP synthase (C/AC39) subunit, putative						PF3D7_0520100	PPM9	protein phosphatase PPM9, putative
PF3D7_0415200	N/A	conserved Plasmodium protein, unknown function						PF3D7_0520700	N/A	CDC73 domain-containing protein, putative
PF3D7_0511800	INO1	inositol-3-phosphate synthase						PF3D7_0520900	SAHH	adenosylhomocysteinase
PF3D7_0723300	N/A	conserved protein, unknown function						PF3D7_0521900	N/A	conserved Plasmodium protein, unknown function
PF3D7_1119100	N/A	tRNA m(1)G methyltransferase, putative						PF3D7_0523400	N/A	DnaJ protein, putative
PF3D7_1130500	COG2	conserved oligomeric Golgi complex subunit 2, putative						PF3D7_0523800	N/A	divalent metal transporter, putative
PF3D7_1247500	N/A	serine/threonine protein kinase, putative						PF3D7_0524000	KASbeta	karyopherin beta
PF3D7_1369500	N/A	conserved protein, unknown function						PF3D7_0524500	N/A	conserved Plasmodium protein, unknown function
PF3D7_1448500	N/A	conserved Plasmodium protein, unknown function						PF3D7_0524800	UFD1	ubiquitin fusion degradation protein 1, putative
PF3D7_1408100	PMIII	plasmepsin III						PF3D7_0525300	N/A	conserved protein, unknown function
PF3D7_0422200	N/A	erythrocyte membrane-associated antigen						PF3D7_0527200	USP14	ubiquitin carboxyl-terminal hydrolase 14
PF3D7_1227300	N/A	conserved Plasmodium protein, unknown function						PF3D7_0527500	HIP	Hsc70-interacting protein
PF3D7_1367100	SNP1	U1 small nuclear ribonucleoprotein 70 kDa homolog, putative						PF3D7_0528200	EIF3E	eukaryotic translation initiation factor 3 subunit E, putative
PF3D7_1401600	N/A	Plasmodium exported protein (PHISTb), unknown function						PF3D7_0528700	CYP23	peptidyl-prolyl cis-trans isomerase
PF3D7_1447900	MDR2	multidrug resistance protein 2						PF3D7_0528800	N/A	nuclear GTP-binding protein, putative
PF3D7_0207600	SERA5	serine repeat antigen 5						PF3D7_0530100	SYN6	SNARE protein, putative
PF3D7_0605500	N/A	cyclin dependent kinase binding protein, putative						PF3D7_0530600	N/A	XAP-5 DNA binding protein, putative
PF3D7_1014600	ADA2	transcriptional coactivator ADA2						PF3D7_0531300	N/A	conserved Plasmodium protein, unknown function
PF3D7_1015400	N/A	RMI1 domain-containing protein, putative						PF3D7_0600200	VAR	erythrocyte membrane protein 1, PfEMP1
PF3D7_1037500	DYN2	dynamin-like protein						PF3D7_0601500	N/A	Plasmodium exported protein (PHISTb), unknown function
PF3D7_1321100	N/A	protein kinase domain-containing protein, putative						PF3D7_0603100	N/A	RNA-binding protein, putative
PF3D7_1340700	RAB11b	ras-related protein Rab-11B						PF3D7_0603500	CAX	cation/H+ antiporter
PF3D7_1363400	DOA1	polyubiquitin binding protein, putative						PF3D7_0603600	N/A	AT-rich interactive domain-containing protein, putative
PF3D7_1445800	N/A	conserved Plasmodium membrane protein, unknown function						PF3D7_0603900	N/A	conserved Plasmodium protein, unknown function
PF3D7_0316200	N/A	conserved Plasmodium protein, unknown function						PF3D7_0604000	N/A	conserved Plasmodium protein, unknown function
PF3D7_0507800	N/A	conserved protein, unknown function						PF3D7_0604300	N/A	conserved Plasmodium protein, unknown function
PF3D7_0510100	N/A	KH domain-containing protein, putative						PF3D7_0605300	ARK1	serine/threonine protein kinase ARK1
PF3D7_0603900	N/A	conserved Plasmodium protein, unknown function						PF3D7_0605900	N/A	elongation of fatty acids protein, putative
PF3D7_0810600	DBP1	ATP-dependent RNA helicase DBP1, putative						PF3D7_0606600	N/A	conserved Plasmodium protein, unknown function
PF3D7_1008000	HDA2	histone deacetylase 2						PF3D7_0607200	N/A	RING zinc finger protein, putative
PF3D7_1035900	MAAP	merozoites-associated armadillo repeats protein						PF3D7_0607600	SAS6	spindle assembly abnormal protein 6, putative
PF3D7_1335100	MSP7	merozoite surface protein 7						PF3D7_0607700	N/A	conserved Plasmodium protein, unknown function
PF3D7_1426700	PEPC	phosphoenolpyruvate carboxylase						PF3D7_0608800	OAT	ornithine aminotransferase
PF3D7_1442400	KIC9	protein KIC9						PF3D7_0608900	N/A	conserved Plasmodium protein, unknown function
PF3D7_1466400	ApiAP2	AP2 domain transcription factor AP2-EXP						PF3D7_0609300	N/A	conserved Plasmodium protein, unknown function
PF3D7_1466800	N/A	NOC3 domain-containing protein, putative						PF3D7_0609900	N/A	conserved Plasmodium protein, unknown function
PF3D7_0204100	N/A	Sel1 repeat-containing protein, putative						PF3D7_0612400	N/A	conserved Plasmodium protein, unknown function
PF3D7_1329100	MyoF	myosin F, putative						PF3D7_0613500	N/A	AP-3 complex subunit beta, putative
PF3D7_1478600	PTP3	EMP1-trafficking protein						PF3D7_0613600	N/A	conserved Plasmodium protein, unknown function
PF3D7_0619000	N/A	FPL domain-containing protein, putative						PF3D7_0613700	N/A	syntaxin-binding protein, putative
PF3D7_1032800	LRR1	leucine-rich repeat protein						PF3D7_0614100	N/A	filamin domain-containing protein, putative
PF3D7_1234800	SF3B3	splicing factor 3B subunit 3, putative						PF3D7_0614200	NAR1	cytosolic Fe-S cluster assembly factor NAR1, putative
PF3D7_1245800	EpsL	epsin-like protein, putative						PF3D7_0614700	N/A	F-box protein FBXO6, putative
PF3D7_1344200	GRP170	endoplasmic reticulum chaperone GRP170						PF3D7_0615000	N/A	conserved Plasmodium protein, unknown function
PF3D7_1354300	N/A	large subunit rRNA methyltransferase, putative						PF3D7_0616000	PDXK	pyridoxal kinase
PF3D7_1360800	FLN	falcilysin						PF3D7_0616300	N/A	conserved Plasmodium protein, unknown function
PF3D7_1456900	N/A	conserved protein, unknown function						PF3D7_0617300	N/A	RNA-binding protein, putative
PF3D7_0302500	CLAG3.1	cytoadherence linked asexual protein 3.1						PF3D7_0618500	MDH	malate dehydrogenase
PF3D7_0305700	N/A	ubiquitin-conjugating enzyme MMS2, putative						PF3D7_0618700	N/A	trafficking protein particle complex subunit 6A, putative
PF3D7_0321900	CARL	cyclic amine resistance locus protein						PF3D7_0619300	N/A	conserved Plasmodium protein, unknown function
PF3D7_0501200	PIESP2	parasite-infected erythrocyte surface protein						PF3D7_0619700	N/A	F-box protein FBXO1, putative
PF3D7_0517000	N/A	60S ribosomal protein L12, putative						PF3D7_0619800	N/A	conserved Plasmodium membrane protein, unknown function
PF3D7_0601900	N/A	conserved Plasmodium protein, unknown function						PF3D7_0620500	N/A	cleavage stimulation factor subunit 1, putative
PF3D7_1008700	N/A	tubulin beta chain						PF3D7_0621200	PDX1	pyridoxine biosynthesis protein PDX1
PF3D7_1035300	GLURP	glutamate-rich protein GLURP						PF3D7_0621400	ALV7	Pf77 protein
PF3D7_1136700	AIP	armadillo-interacting protein AIP						PF3D7_0621800	N/A	nascent polypeptide-associated complex subunit alpha, putative
PF3D7_0414900	ARO	armadillo-domain containing rhoptry protein						PF3D7_0622200	MIAB	tRNA-2-methylthio-N(6)-dimethylallyladenosine synthase
PF3D7_1121600	EXP1	exported protein 1						PF3D7_0622900	AP2Tel	AP2 domain transcription factor AP2Tel
PF3D7_1007400	N/A	conserved protein, unknown function						PF3D7_0623600	N/A	splicing factor-like protein 1, putative
PF3D7_0505100	TRS85	trafficking protein particle complex subunit 8, putative						PF3D7_0624200	N/A	SURP domain-containing protein, putative
PF3D7_0907600	N/A	translation initiation factor SUI1, putative						PF3D7_0625800	N/A	conserved Plasmodium protein, unknown function
PF3D7_1002700	N/A	conserved Plasmodium protein, unknown function						PF3D7_0627300	RNF5	E3 ubiquitin-protein ligase RNF5, putative
PF3D7_1136600	N/A	conserved Plasmodium protein, unknown function						PF3D7_0627700	N/A	transportin
PF3D7_1239000	N/A	HD superfamily phosphohydrolase protein, putative						PF3D7_0627900	POP4	ribonuclease P protein subunit p29, putative
PF3D7_1334300	MSRP5	MSP7-like protein						PF3D7_0628500	N/A	conserved Plasmodium protein, unknown function
PF3D7_1440700	AP3M	AP-3 complex subunit mu, putative						PF3D7_0629100	NAPRT	nicotinate phosphoribosyltransferase, putative
PF3D7_0306700	EMC5	ER membrane protein complex subunit 5, putative						PF3D7_0629400	PABP3	polyadenylate-binding protein 3, putative
PF3D7_0324800	RIF	rifin						PF3D7_0629800	N/A	cullin-2, putative
PF3D7_0717100	N/A	CRAL/TRIO domain-containing protein, putative						PF3D7_0630900	HAS1	ATP-dependent RNA helicase HAS1
PF3D7_0802800	CNA	serine/threonine protein phosphatase 2B catalytic subunit A						PF3D7_0631000	N/A	tetratricopeptide repeat protein, putative
PF3D7_0930300	MSP1	merozoite surface protein 1						PF3D7_0632500	VAR	erythrocyte membrane protein 1, PfEMP1
PF3D7_1023000	N/A	conserved Plasmodium protein, unknown function						PF3D7_0702400	SEMP1	small exported membrane protein 1
PF3D7_0313000	N/A	conserved Plasmodium protein, unknown function						PF3D7_0703500	N/A	erythrocyte membrane-associated antigen
PF3D7_0319500	N/A	RNA-binding protein, putative						PF3D7_0703600	N/A	conserved protein, unknown function
PF3D7_0423500	GAPM2	glideosome associated protein with multiple membrane spans 2						PF3D7_0704700	PPAT	phosphopantetheine adenylyltransferase, putative
PF3D7_0610200	RBM25	RNA-binding protein 25, putative						PF3D7_0705000	N/A	mRNA cap guanine-N7 methyltransferase, putative
PF3D7_0905900	SEC27	coatomer subunit beta, putative						PF3D7_0706300	N/A	conserved Plasmodium protein, unknown function
PF3D7_1307500	N/A	conserved Plasmodium protein, unknown function						PF3D7_0707200	N/A	conserved Plasmodium protein, unknown function
PF3D7_1336400	N/A	RanBPM and CLTH-like protein, putative						PF3D7_0707400	N/A	AAA family ATPase, putative
PF3D7_0831700	HSP70x	heat shock protein 70						PF3D7_0707500	N/A	conserved Plasmodium protein, unknown function
PF3D7_1351700	IMC1f	inner membrane complex protein 1f, putative						PF3D7_0708000	N/A	cytoskeleton associated protein, putative
PF3D7_1358400	N/A	conserved Plasmodium protein, unknown function						PF3D7_0708500	N/A	heat shock protein 86 family protein
PF3D7_1434500	N/A	dynein-related AAA-type ATPase, putative						PF3D7_0709600	POP1	ribonucleases P/MRP protein subunit POP1, putative
PF3D7_0202400	PTEF	translation-enhancing factor						PF3D7_0709900	N/A	hydrolase, putative
PF3D7_0202500	ETRAMP2	early transcribed membrane protein 2						PF3D7_0710800	USE1	protein transport protein USE1, putative
PF3D7_0319200	CCR4-4	CCR4 domain-containing protein 4, putative						PF3D7_0711300	N/A	conserved Plasmodium protein, unknown function
PF3D7_0501600	RAP2	rhoptry-associated protein 2						PF3D7_0712000	VAR	erythrocyte membrane protein 1, PfEMP1
PF3D7_0933700	N/A	conserved Plasmodium protein, unknown function						PF3D7_0712300	VAR	erythrocyte membrane protein 1, PfEMP1
PF3D7_1001600	XL2	exported lipase 2						PF3D7_0712600	VAR	erythrocyte membrane protein 1, PfEMP1
PF3D7_1231400	ICM1	membrane protein ICM1						PF3D7_0714600	N/A	conserved protein, unknown function
PF3D7_0302600	ABCB4	ABC transporter B family member 4, putative						PF3D7_0716100	SDA1	protein SDA1, putative
PF3D7_0707300	RAMA	rhoptry-associated membrane antigen						PF3D7_0716300	N/A	conserved protein, unknown function
PF3D7_1456300	N/A	conserved Plasmodium protein, unknown function						PF3D7_0717100	N/A	CRAL/TRIO domain-containing protein, putative
PF3D7_0809600	N/A	peptidase family C50, putative						PF3D7_0717300	N/A	transcription initiation factor IIE subunit alpha, putative
PF3D7_1428800	N/A	transcription initiation TFIID-like, putative						PF3D7_0717400	N/A	queuine tRNA-ribosyltransferase, putative
PF3D7_0415900	N/A	60S ribosomal protein L15, putative						PF3D7_0717500	CDPK4	calcium-dependent protein kinase 4
PF3D7_1031500	DDX3X	ATP-dependent DNA helicase DDX3X						PF3D7_0717800	N/A	conserved Plasmodium protein, unknown function
PF3D7_1442700	N/A	conserved Plasmodium protein, unknown function						PF3D7_0718100	EST	exported serine/threonine protein kinase
PF3D7_0102200	RESA	ring-infected erythrocyte surface antigen						PF3D7_0721000	N/A	conserved Plasmodium membrane protein, unknown function
PF3D7_0315800	N/A	zinc finger protein, putative						PF3D7_0721100	N/A	conserved protein, unknown function
PF3D7_1007000	TMEM147	transmembrane protein 147, putative						PF3D7_0721200	N/A	conserved Plasmodium protein, unknown function
PF3D7_1013600	N/A	conserved Plasmodium protein, unknown function						PF3D7_0721600	N/A	40S ribosomal protein S5, putative
PF3D7_0212300	ERF1	eukaryotic peptide chain release factor subunit 1, putative						PF3D7_0722400	OLA1	Obg-like ATPase 1, putative
PF3D7_0420300	ApiAP2	AP2 domain transcription factor, putative						PF3D7_0722500	CWC15	pre-mRNA-splicing factor CWC15, putative
PF3D7_1028900	IMC1m	inner membrane complex protein 1m, putative						PF3D7_0722600	UTP7	U3 small nucleolar RNA-associated protein 7, putative
PF3D7_1034300	TLAP2	thioredoxin-like associated protein 2, putative						PF3D7_0724000	N/A	Rab GTPase activator and protein kinase, putative
PF3D7_1035200	N/A	S-antigen						PF3D7_0724600	N/A	protein kinase, putative
PF3D7_1118500	NOP56	nucleolar protein 56, putative						PF3D7_0725100	N/A	conserved Plasmodium membrane protein, unknown function
PF3D7_1123500	GP2	golgi protein 2						PF3D7_0725300	N/A	conserved protein, unknown function
PF3D7_1143400	N/A	translation initiation factor eIF-1A, putative						PF3D7_0726100	N/A	Plasmodium exported protein, unknown function
PF3D7_1237500	N/A	conserved Plasmodium protein, unknown function						PF3D7_0726300	PMS1	DNA mismatch repair protein PMS1, putative
PF3D7_1324600	N/A	conserved Plasmodium protein, unknown function						PF3D7_0726600	N/A	conserved Plasmodium protein, unknown function
PF3D7_1335700	COG3	conserved oligomeric Golgi complex subunit 3, putative						PF3D7_0727900	N/A	conserved Plasmodium protein, unknown function
PF3D7_1401400	ETRAMP14	early transcribed membrane protein 14.1						PF3D7_0728100	N/A	anaphase-promoting complex subunit 1, putative
PF3D7_1405900	N/A	RNA-binding protein, putative						PF3D7_0728900	N/A	RNA-binding protein, putative
PF3D7_1415900	N/A	zinc finger protein, putative						PF3D7_0729400	N/A	ribosome biogenesis protein BRX1, putative
PF3D7_1436300	PTEX150	translocon component PTEX150						PF3D7_0730400	IMP2	IMP1-like protein, putative
PF3D7_1120000	N/A	conserved protein, unknown function						PF3D7_0730800	N/A	Plasmodium exported protein, unknown function
PF3D7_0623800	TKL4	tyrosine kinase-like protein, putative						PF3D7_0731800	GEXP08	alpha/beta hydrolase, putative
PF3D7_0727900	N/A	conserved Plasmodium protein, unknown function						PF3D7_0802300	PWP2	periodic tryptophan protein 2, putative
PF3D7_0728800	N/A	conserved Plasmodium protein, unknown function						PF3D7_0803000	CYP81	peptidyl-prolyl cis-trans isomerase
PF3D7_1016500	N/A	Plasmodium exported protein (PHISTc), unknown function						PF3D7_0803100	UTP14	U3 small nucleolar RNA-associated protein 14, putative
PF3D7_1231100	RAB2	ras-related protein Rab-2						PF3D7_0803300	MORG1	mitogen-activated protein kinase organizer 1, putative
PF3D7_1244600	ARFGAP1	ADP-ribosylation factor GTPase-activating protein 1						PF3D7_0803400	RAD54	DNA repair and recombination protein RAD54, putative
PF3D7_0527600	N/A	conserved Plasmodium protein, unknown function						PF3D7_0803600	N/A	conserved Plasmodium protein, unknown function
PF3D7_0719300	ARP6	actin-related protein ARP6						PF3D7_0804300	N/A	zinc finger protein, putative
PF3D7_0103300	N/A	conserved protein, unknown function						PF3D7_0806000	N/A	AAA family ATPase, putative
PF3D7_0216600	N/A	sugar transporter, putative						PF3D7_0806100	N/A	conserved Plasmodium protein, unknown function
PF3D7_1021700	N/A	VPS13 domain-containing protein, putative						PF3D7_0806300	FLP	ferlin-like protein, putative
PF3D7_1027100	MPP10	U3 small nucleolar ribonucleoprotein protein MPP10, putative						PF3D7_0806500	N/A	DnaJ protein, putative
PF3D7_1343800	N/A	VPS13 domain-containing protein, putative						PF3D7_0806700	N/A	conserved Plasmodium membrane protein, unknown function
PF3D7_1351000	N/A	phosphatidylinositol transfer protein, putative						PF3D7_0807100	PSH3	DNA helicase PSH3
PF3D7_1437400	PANK2	pantothenate kinase 2						PF3D7_0807300	RAB18	ras-related protein Rab-18
PF3D7_1460700	RPL27	60S ribosomal protein L27						PF3D7_0807900	TyrRS	tyrosine--tRNA ligase
PF3D7_0621200	PDX1	pyridoxine biosynthesis protein PDX1						PF3D7_0809100	VAR	erythrocyte membrane protein 1, PfEMP1
PF3D7_1033100	AdoMetDC/ODC	S-adenosylmethionine decarboxylase/ornithine decarboxylase						PF3D7_0809600	N/A	peptidase family C50, putative
PF3D7_1039000	FIKK10.2	serine/threonine protein kinase, FIKK family						PF3D7_0809900	JmjC1	JmjC domain-containing protein 1, putative
PF3D7_1432300	N/A	conserved Plasmodium protein, unknown function						PF3D7_0810000	N/A	acyl-CoA binding protein, putative
PF3D7_1473100	N/A	GTPase-activating protein, putative						PF3D7_0811400	N/A	conserved protein, unknown function
PF3D7_0405200	CERLI2	protein CERLI2						PF3D7_0812300	SSP3	sporozoite surface protein 3, putative
PF3D7_0821300	DHX36	ATP-dependent RNA helicase DHX36, putative						PF3D7_0812700	SNRPC	U1 small nuclear ribonucleoprotein C, putative
PF3D7_0310600	EIF3K	eukaryotic translation initiation factor 3 subunit K, putative						PF3D7_0812800	N/A	zinc finger protein, putative
PF3D7_0604000	N/A	conserved Plasmodium protein, unknown function						PF3D7_0813600	N/A	translation initiation factor SUI1, putative
PF3D7_0608500	N/A	proteasome subunit alpha type-2, putative						PF3D7_0814000	N/A	60S ribosomal protein L13-2, putative
PF3D7_0701600	MC-2TM	Pfmc-2TM Maurer's cleft two transmembrane protein						PF3D7_0814400	N/A	phospholipase DDHD1, putative
PF3D7_0813400	N/A	conserved protein, unknown function						PF3D7_0815500	N/A	conserved Plasmodium protein, unknown function
PF3D7_1025000	EPS15	Eps15-like protein						PF3D7_0816000	RRB1	ribosome assembly protein RRB1, putative
PF3D7_1206800	N/A	conserved Plasmodium protein, unknown function						PF3D7_0816500	HSP20	small heat shock protein HSP20, putative
PF3D7_1222300	GRP94	endoplasmin, putative						PF3D7_0817200	N/A	conserved protein, unknown function
PF3D7_1307700	N/A	TOM1-like protein, putative						PF3D7_0817600	N/A	conserved protein, unknown function
PF3D7_0208400	N/A	conserved Plasmodium protein, unknown function						PF3D7_0818100	N/A	zinc finger protein, putative
PF3D7_0629800	N/A	cullin-2, putative						PF3D7_0819000	N/A	ribonuclease, putative
PF3D7_0720700	PX1	phosphoinositide-binding protein PX1						PF3D7_0819600	N/A	ubiquitin-like protein, putative
PF3D7_1301600	EBA140	erythrocyte binding antigen-140						PF3D7_0819900	LSM3	U6 snRNA-associated Sm-like protein LSm3, putative
PF3D7_1409600	N/A	histidine phosphatase, putative						PF3D7_0821100	PK1	protein kinase 1
PF3D7_1304100	LigI	DNA ligase I						PF3D7_0823000	VPS15	serine/threonine protein kinase VPS15, putative
PF3D7_1450500	N/A	conserved Plasmodium protein, unknown function						PF3D7_0824200	N/A	conserved Plasmodium protein, unknown function
PF3D7_0102500	EBA181	erythrocyte binding antigen-181						PF3D7_0824600	DRE2	Fe-S cluster assembly protein DRE2, putative
PF3D7_0532100	ETRAMP5	early transcribed membrane protein 5						PF3D7_0825300	N/A	SAYSvFN domain-containing protein, putative
PF3D7_0708800	HSP110c	heat shock protein 110						PF3D7_0825900	N/A	conserved Plasmodium protein, unknown function
PF3D7_1001500	ETRAMP10	early transcribed membrane protein 10.1						PF3D7_0826600	VAMP7	SNARE protein, putative
PF3D7_1226700	RRP9	U3 small nucleolar RNA-interacting protein 2, putative						PF3D7_0827300	N/A	conserved Plasmodium protein, unknown function
PF3D7_1410400	RAP1	rhoptry-associated protein 1						PF3D7_0827900	PDI8	protein disulfide-isomerase
PF3D7_0902200	FIKK9.3	serine/threonine protein kinase, FIKK family						PF3D7_0828000	ROM3	rhomboid protease ROM3
PF3D7_1016400	FIKK10.1	serine/threonine protein kinase, FIKK family						PF3D7_0829400	N/A	prolyl 4-hydroxylase subunit alpha, putative
PF3D7_1039700	MC-2TM	Pfmc-2TM Maurer's cleft two transmembrane protein						PF3D7_0830900	N/A	Plasmodium exported protein, unknown function
PF3D7_1225700	N/A	VAC14 domain-containing protein, putative						PF3D7_0831000	GEXP09	Plasmodium exported protein (PHISTb), unknown function
PF3D7_0514900	N/A	conserved Plasmodium protein, unknown function						PF3D7_0831400	N/A	Plasmodium exported protein, unknown function
PF3D7_0704700	PPAT	phosphopantetheine adenylyltransferase, putative						PF3D7_0831700	HSP70x	heat shock protein 70
PF3D7_0410000	EVP1	erythrocyte vesicle protein 1						PF3D7_0903300	N/A	conserved protein, unknown function
PF3D7_1031600	GEXP15	protein GEXP15						PF3D7_0903600	N/A	conserved protein, unknown function
PF3D7_1128100	N/A	prefoldin subunit 5, putative						PF3D7_0903700	N/A	alpha tubulin 1
PF3D7_1235900	XAB2	pre-mRNA-splicing factor SYF1, putative						PF3D7_0904800	RPA1	replication protein A1, small fragment
PF3D7_1236000	N/A	vesicle transport v-SNARE protein VTI1, putative						PF3D7_0905300	N/A	dynein heavy chain, putative
PF3D7_1407000	CCp3	LCCL domain-containing protein						PF3D7_0905700	ATG3	autophagy-related protein 3, putative
PF3D7_1238600	NSM	sphingomyelin phosphodiesterase						PF3D7_0906400	N/A	dynein intermediate light chain, putative
PF3D7_0404900	P41	6-cysteine protein P41						PF3D7_0906910	N/A	tubulin-specific chaperone, putative
PF3D7_0508000	P38	6-cysteine protein						PF3D7_0908500	N/A	conserved Plasmodium protein, unknown function
PF3D7_0812100	N/A	proteasome activator complex subunit 4, putative						PF3D7_0909000	N/A	conserved Plasmodium protein, unknown function
PF3D7_0108700	PSOP24	secreted ookinete protein, putative						PF3D7_0909400	N/A	exoribonuclease, putative
PF3D7_0729100	N/A	allantoicase, putative						PF3D7_0909700	N/A	FHA domain protein, putative
PF3D7_0813100	N/A	conserved Plasmodium protein, unknown function						PF3D7_0909900	N/A	helicase SKI2W, putative
PF3D7_0819000	N/A	ribonuclease, putative						PF3D7_0910100	N/A	exportin-7, putative
PF3D7_1302000	PTP6	EMP1-trafficking protein						PF3D7_0910900	N/A	DNA primase large subunit, putative
PF3D7_1361900	PCNA1	proliferating cell nuclear antigen 1						PF3D7_0911900	ICP	falstatin
PF3D7_1429800	N/A	coatomer subunit beta, putative						PF3D7_0912000	N/A	conserved Plasmodium protein, unknown function
PF3D7_1369100	N/A	conserved Plasmodium protein, unknown function						PF3D7_0912600	N/A	conserved Plasmodium protein, unknown function
PF3D7_0820900	N/A	conserved Plasmodium protein, unknown function						PF3D7_0913300	N/A	conserved protein, unknown function
PF3D7_1305300	GCN1	translational activator GCN1, putative						PF3D7_0913600	N/A	conserved Plasmodium protein, unknown function
PF3D7_0705000	N/A	mRNA cap guanine-N7 methyltransferase, putative						PF3D7_0914300	N/A	met-10+ like protein, putative
PF3D7_0707700	N/A	E3 ubiquitin-protein ligase, putative						PF3D7_0916400	N/A	conserved Plasmodium protein, unknown function
PF3D7_1017000	N/A	DNA polymerase delta catalytic subunit						PF3D7_0917000	MOP	merozoite organizing protein
PF3D7_1119300	U2AF1	splicing factor U2AF small subunit, putative						PF3D7_0917500	N/A	conserved protein, unknown function
PF3D7_1029600	ADA	adenosine deaminase						PF3D7_0917600	PRP43	pre-mRNA-splicing factor ATP-dependent RNA helicase PRP43, putative
PF3D7_1116000	RON4	rhoptry neck protein 4						PF3D7_0918600	RECQ1	ATP-dependent DNA helicase Q1
PF3D7_1129100	PV1	parasitophorous vacuolar protein 1						PF3D7_0919500	MFS3	major facilitator superfamily domain-containing protein, putative
PF3D7_1129200	RPN7	26S proteasome regulatory subunit RPN7, putative						PF3D7_0920400	N/A	conserved Plasmodium protein, unknown function
PF3D7_1120500	N/A	tRNA nucleotidyltransferase, putative						PF3D7_0920800	IMPDH	inosine-5'-monophosphate dehydrogenase
PF3D7_1462300	N/A	GTP-binding protein, putative						PF3D7_0920900	PRP24	U4/U6 snRNA-associated-splicing factor, putative
PF3D7_1102800	ETRAMP11.2	early transcribed membrane protein 11.2						PF3D7_0921200	N/A	conserved Plasmodium membrane protein, unknown function
PF3D7_0629600	N/A	ribosomal RNA-processing protein 7, putative						PF3D7_0921600	N/A	tetratricopeptide repeat protein, putative
PF3D7_0721100	N/A	conserved protein, unknown function						PF3D7_0922500	PGK	phosphoglycerate kinase
PF3D7_0722400	OLA1	Obg-like ATPase 1, putative						PF3D7_0922700	PRP18	pre-mRNA-splicing factor 18, putative
PF3D7_0811500	CARM1	histone-arginine methyltransferase CARM1, putative						PF3D7_0923000	RPB3	DNA-directed RNA polymerase II subunit RPB3, putative
PF3D7_0935800	CLAG9	cytoadherence linked asexual protein 9						PF3D7_0923200	NOS	nitric oxide synthase, putative
PF3D7_1033600	CEF1	pre-mRNA-splicing factor CEF1, putative						PF3D7_0924100	N/A	conserved Plasmodium protein, unknown function
PF3D7_1136900	SUB2	subtilisin-like protease 2						PF3D7_0925400	N/A	protein phosphatase-beta
PF3D7_1340900	PiT	sodium-dependent phosphate transporter						PF3D7_0925700	HDAC1	histone deacetylase 1
PF3D7_1476600	N/A	Plasmodium exported protein, unknown function						PF3D7_0925800	UPF2	regulator of nonsense transcripts 2, putative
PF3D7_0114100	MC-2TM	Pfmc-2TM Maurer's cleft two transmembrane protein						PF3D7_0927700	PPP4	serine/threonine protein phosphatase 4, putative
PF3D7_0212400	N/A	conserved Plasmodium membrane protein, unknown function						PF3D7_0928800	N/A	serine/threonine protein kinase, putative
PF3D7_0321000	N/A	conserved protein, unknown function						PF3D7_0929000	TAF7	transcription initiation factor TFIID subunit 7, putative
PF3D7_0528000	UMP1	proteasome maturation factor UMP1, putative						PF3D7_0929400	RhopH2	high molecular weight rhoptry protein 2
PF3D7_0210600	CERLI1	protein CERLI1						PF3D7_0930400	N/A	zinc finger protein, putative
PF3D7_0508700	PRP5	pre-mRNA-processing ATP-dependent RNA helicase PRP5, putative						PF3D7_0931000	N/A	elongation factor Tu, putative
PF3D7_0515300	PI3K	phosphatidylinositol 3-kinase						PF3D7_0931100	N/A	nucleolar protein Nop52, putative
PF3D7_0721200	N/A	conserved Plasmodium protein, unknown function						PF3D7_0933900	N/A	conserved Plasmodium protein, unknown function
PF3D7_0802400	N/A	cyclin-like protein, putative						PF3D7_0934100	XPD	TFIIH basal transcription factor complex helicase XPD subunit
PF3D7_0923900	PABP2	polyadenylate-binding protein 2, putative						PF3D7_0934700	N/A	UBX domain-containing protein, putative
PF3D7_1433900	N/A	protein kinase, putative						PF3D7_0935000	SNRPB2	U2 small nuclear ribonucleoprotein B'', putative
PF3D7_0310900	N/A	conserved Plasmodium protein, unknown function						PF3D7_0935500	GEXP22	Plasmodium exported protein, unknown function
PF3D7_0912900	RPN8	26S proteasome regulatory subunit RPN8, putative						PF3D7_0935600	GIG	gametocytogenesis-implicated protein
PF3D7_1457900	N/A	conserved Plasmodium protein, unknown function						PF3D7_0935800	CLAG9	cytoadherence linked asexual protein 9
PF3D7_0908300	N/A	conserved protein, unknown function						PF3D7_0936000	REX2	ring-exported protein 2
PF3D7_0106400	N/A	pre-rRNA-processing protein TSR2, putative						PF3D7_0936800	N/A	Plasmodium exported protein (PHISTc), unknown function
PF3D7_0303000	NSF	N-ethylmaleimide-sensitive fusion protein						PF3D7_1001000	CSA-L	chondroitin sulfate A ligand
PF3D7_1200700	ACS7	acyl-CoA synthetase						PF3D7_1001500	ETRAMP10	early transcribed membrane protein 10.1
PF3D7_1216400	N/A	conserved Plasmodium membrane protein, unknown function						PF3D7_1001800	N/A	Plasmodium exported protein (PHISTc), unknown function
PF3D7_1421100	N/A	conserved Plasmodium protein, unknown function						PF3D7_1002700	N/A	conserved Plasmodium protein, unknown function
PF3D7_0401800	PfD80	Plasmodium exported protein (PHISTb), unknown function						PF3D7_1002800	N/A	DnaJ protein, putative
PF3D7_1464600	UIS2	serine/threonine protein phosphatase UIS2, putative						PF3D7_1003400	N/A	conserved Plasmodium protein, unknown function
PF3D7_0902000	FIKK9.1	serine/threonine protein kinase, FIKK family						PF3D7_1003700	N/A	MKT1 domain-containing protein, putative
PF3D7_1116800	HSP101	heat shock protein 101						PF3D7_1003800	EFTUD2	U5 small nuclear ribonucleoprotein component, putative
PF3D7_1301700	CBP2	CX3CL1-binding protein 2						PF3D7_1004000	N/A	60S ribosomal protein L13, putative
PF3D7_0220600	N/A	Plasmodium exported protein (hyp9), unknown function						PF3D7_1004600	N/A	conserved Plasmodium membrane protein, unknown function
PF3D7_0402100	N/A	Plasmodium exported protein (PHISTb), unknown function						PF3D7_1005100	UTP25	U3 small nucleolar RNA-associated protein 25, putative
PF3D7_1143200	N/A	DnaJ protein, putative						PF3D7_1005600	N/A	DnaJ protein, putative
PF3D7_1362800	N/A	conserved Plasmodium protein, unknown function						PF3D7_1006900	N/A	PPPDE peptidase, putative
PF3D7_1456700	N/A	conserved Plasmodium protein, unknown function						PF3D7_1007400	N/A	conserved protein, unknown function
PF3D7_1417200	NOT1	CCR4-NOT transcription complex subunit NOT1, putative						PF3D7_1007900	EIF3D	eukaryotic translation initiation factor 3 subunit D, putative
PF3D7_1233100	N/A	conserved protein, unknown function						PF3D7_1009200	N/A	ribonuclease, putative
PF3D7_0905000	ATPTG4	ATP synthase-associated protein, putative						PF3D7_1009400	ZNF2	zinc finger protein, putative
PF3D7_1133800	N/A	RNA (uracil-5-)methyltransferase, putative						PF3D7_1010600	eIF2beta	eukaryotic translation initiation factor 2 subunit beta
PF3D7_0918300	EIF3F	eukaryotic translation initiation factor 3 subunit F, putative						PF3D7_1011700	RAD23	DNA repair protein RAD23, putative
PF3D7_1145400	DYN1	dynamin-like protein						PF3D7_1012400	HGPRT	hypoxanthine-guanine phosphoribosyltransferase
PF3D7_1226600	PCNA2	proliferating cell nuclear antigen 2						PF3D7_1014400	MRK	MO15-related protein kinase
PF3D7_1321300	N/A	conserved Plasmodium membrane protein, unknown function						PF3D7_1015300	METAP1b	methionine aminopeptidase 1b, putative
PF3D7_0416500	MAF1	repressor of RNA polymerase III transcription MAF1						PF3D7_1015500	N/A	nucleotidyltransferase, putative
PF3D7_0423700	ETRAMP4	early transcribed membrane protein 4						PF3D7_1015600	HSP60	heat shock protein 60
PF3D7_0525300	N/A	conserved protein, unknown function						PF3D7_1016400	FIKK10.1	serine/threonine protein kinase, FIKK family
PF3D7_0819900	LSM3	U6 snRNA-associated Sm-like protein LSm3, putative						PF3D7_1016500	N/A	Plasmodium exported protein (PHISTc), unknown function
PF3D7_0822900	PIC2	PhIL1-interacting candidate PIC2						PF3D7_1016700	N/A	Plasmodium exported protein (PHISTc), unknown function
PF3D7_0721600	N/A	40S ribosomal protein S5, putative						PF3D7_1016900	ETRAMP10.3	early transcribed membrane protein 10.3
PF3D7_0913300	N/A	conserved protein, unknown function						PF3D7_1017000	N/A	DNA polymerase delta catalytic subunit
PF3D7_0106300	ATP6	calcium-transporting ATPase						PF3D7_1017300	GRASP	golgi re-assembly stacking protein 1
PF3D7_0215300	ACS8	acyl-CoA synthetase						PF3D7_1017900	RPN5	26S proteasome regulatory subunit p55, putative
PF3D7_0726400	N/A	conserved Plasmodium membrane protein, unknown function						PF3D7_1019400	N/A	60S ribosomal protein L30e, putative
PF3D7_1104000	N/A	phenylalanine--tRNA ligase beta subunit						PF3D7_1020000	RBM34	RNA-binding protein 34, putative
PF3D7_1122800	CDPK6	calcium-dependent protein kinase 6						PF3D7_1020300	N/A	cytoplasmic dynein intermediate chain, putative
PF3D7_0504000	ATPase3	cation transporting P-ATPase						PF3D7_1021200	N/A	conserved Plasmodium protein, unknown function
PF3D7_0702300	STARP	sporozoite threonine and asparagine-rich protein						PF3D7_1021400	N/A	endomembrane protein 70, putative
PF3D7_0725300	N/A	conserved protein, unknown function						PF3D7_1021500	ROK1	ATP-dependent RNA helicase ROK1, putative
PF3D7_0803000	CYP81	peptidyl-prolyl cis-trans isomerase						PF3D7_1022000	N/A	RNA-binding protein UIS12, putative
PF3D7_1010200	N/A	DNA2/NAM7 helicase, putative						PF3D7_1022300	ZIPCO	ZIP domain-containing protein, putative
PF3D7_1012900	ATG18	autophagy-related protein 18						PF3D7_1023800	N/A	conserved Plasmodium protein, unknown function
PF3D7_1303200	VAMP8	SNARE protein, putative						PF3D7_1024100	N/A	conserved Plasmodium protein, unknown function
PF3D7_1336800	NUDC	nuclear movement protein, putative						PF3D7_1024800	EXP3	exported protein 3
PF3D7_0113000	GARP	glutamic acid-rich protein GARP						PF3D7_1028200	N/A	RING zinc finger protein, putative
PF3D7_1003700	N/A	MKT1 domain-containing protein, putative						PF3D7_1028400	N/A	ribosome biogenesis protein RPF2, putative
PF3D7_1338300	EF-1gamma	elongation factor 1-gamma, putative						PF3D7_1028500	N/A	partial CSTF domain-containing protein, putative
PF3D7_1464500	N/A	conserved Plasmodium membrane protein, unknown function						PF3D7_1028900	IMC1m	inner membrane complex protein 1m, putative
PF3D7_0605800	RAD50	DNA repair protein RAD50, putative						PF3D7_1029100	N/A	conserved Plasmodium protein, unknown function
PF3D7_1469800	N/A	conserved Plasmodium protein, unknown function						PF3D7_1029900	N/A	ORC3 domain-containing protein, putative
PF3D7_0824200	N/A	conserved Plasmodium protein, unknown function						PF3D7_1030300	N/A	conserved Plasmodium protein, unknown function
PF3D7_1108600	ERC	endoplasmic reticulum-resident calcium binding protein						PF3D7_1031500	DDX3X	ATP-dependent DNA helicase DDX3X
PF3D7_1433400	PHD2	PHD finger protein PHD2, putative						PF3D7_1031700	I3	protein phosphatase inhibitor 3
PF3D7_0922900	FabG	3-oxoacyl-[acyl-carrier-protein] reductase						PF3D7_1032500	Der1-2	DER1-like protein, putative
PF3D7_1001000	CSA-L	chondroitin sulfate A ligand						PF3D7_1033100	AdoMetDC/ODC	S-adenosylmethionine decarboxylase/ornithine decarboxylase
PF3D7_1328100	N/A	proteasome subunit beta type-7, putative						PF3D7_1034000	SLY1	Sec1 family protein, putative
PF3D7_1105500	CEN4	centrin-4						PF3D7_1034300	TLAP2	thioredoxin-like associated protein 2, putative
PF3D7_1324000	N/A	conserved Plasmodium protein, unknown function						PF3D7_1035200	N/A	S-antigen
PF3D7_1372400	ACS4	acyl-CoA synthetase						PF3D7_1035300	GLURP	glutamate-rich protein GLURP
PF3D7_1430700	GDH2	NADP-specific glutamate dehydrogenase						PF3D7_1035700	DBLMSP	duffy binding-like merozoite surface protein
PF3D7_0310300	N/A	phosphoglycerate mutase, putative						PF3D7_1036700	PhLP2	phosducin-like protein 2, putative
PF3D7_1419700	EIF3H	eukaryotic translation initiation factor 3 subunit H, putative						PF3D7_1036800	ACT	acetyl-CoA transporter, putative
PF3D7_1202600	NEMF	nuclear export mediator factor NEMF, putative						PF3D7_1037600	XPB	TFIIH basal transcription factor complex helicase XPB subunit, putative
PF3D7_0709400	N/A	Cg7 protein						PF3D7_1038000	N/A	antigen UB05
PF3D7_0731600	ACS5	acyl-CoA synthetase						PF3D7_1038800	N/A	RESA-like protein with PHIST and DnaJ domains
PF3D7_1240000	N/A	3-hydroxyisobutyryl-CoA hydrolase, putative						PF3D7_1039700	MC-2TM	Pfmc-2TM Maurer's cleft two transmembrane protein
PF3D7_1252100	RON3	rhoptry neck protein 3						PF3D7_1101300	RIF	rifin
PF3D7_0206500	N/A	conserved Plasmodium protein, unknown function						PF3D7_1101700	MC-2TM	Pfmc-2TM Maurer's cleft two transmembrane protein
PF3D7_1141300	APR1	apical polar ring protein APR1, putative						PF3D7_1102800	ETRAMP11.2	early transcribed membrane protein 11.2
PF3D7_0801000	N/A	Plasmodium exported protein (PHISTc)						PF3D7_1103100	RPP1	60S acidic ribosomal protein P1, putative
PF3D7_0616000	PDXK	pyridoxal kinase						PF3D7_1103600	ALP2a	actin-like protein, putative
PF3D7_1230700	SEC13	protein transport protein SEC13						PF3D7_1104000	N/A	phenylalanine--tRNA ligase beta subunit
PF3D7_0321800	N/A	WD repeat-containing protein, putative						PF3D7_1105500	CEN4	centrin-4
PF3D7_1108100	N/A	conserved Plasmodium protein, unknown function						PF3D7_1106700	DNA2	DNA replication ATP-dependent helicase/nuclease DNA2, putative
PF3D7_1408700	N/A	conserved protein, unknown function						PF3D7_1106800	pTKL	pseudo-tyrosine kinase-like protein
PF3D7_0818700	N/A	DNA helicase, putative						PF3D7_1107100	N/A	nucleic acid binding protein, putative
PF3D7_1135100	PPM8	protein phosphatase PPM8, putative						PF3D7_1107400	RAD51	DNA repair protein RAD51
PF3D7_1332600	APN1	DNA-(apurinic or apyrimidinic site) lyase 1						PF3D7_1108000	N/A	IWS1-like protein, putative
PF3D7_1340600	DBR1	RNA lariat debranching enzyme, putative						PF3D7_1108100	N/A	conserved Plasmodium protein, unknown function
PF3D7_0409700	RF2	peptide chain release factor 2						PF3D7_1110100	N/A	conserved Plasmodium protein, unknown function
PF3D7_0601500	N/A	Plasmodium exported protein (PHISTb), unknown function						PF3D7_1110300	N/A	G-patch domain-containing protein, putative
PF3D7_0930500	DGK1	diacylglycerol kinase, putative						PF3D7_1111200	N/A	conserved protein, unknown function
PF3D7_1311800	M1AAP	M1-family alanyl aminopeptidase						PF3D7_1111300	BOS1	protein transport protein BOS1, putative
PF3D7_0417400	N/A	conserved Plasmodium protein, unknown function						PF3D7_1112600	N/A	ATPase, putative
PF3D7_0724600	N/A	protein kinase, putative						PF3D7_1113000	N/A	conserved Plasmodium protein, unknown function
PF3D7_1422800	ARP4	actin-related protein ARP4						PF3D7_1113100	PRL	protein tyrosine phosphatase
PF3D7_0617100	N/A	AP-2 complex subunit alpha, putative						PF3D7_1113300	UGT	UDP-galactose transporter, putative
PF3D7_1202100	SRAP1	SRAP domain-containing protein, putative						PF3D7_1113400	DSK2	ubiquitin domain-containing protein DSK2, putative
PF3D7_0710800	USE1	protein transport protein USE1, putative						PF3D7_1113900	MAPK2	mitogen-activated protein kinase 2
PF3D7_0303500	N/A	spindle pole body protein, putative						PF3D7_1114100	ROM1	rhomboid protease ROM1
PF3D7_1327600	NMNAT	nicotinamide/nicotinic acid mononucleotide adenylyltransferase						PF3D7_1114200	N/A	GTPase-activating protein, putative
PF3D7_1403100	CAPD2	condensin complex subunit 1, putative						PF3D7_1114500	N/A	conserved Plasmodium protein, unknown function
PF3D7_0103900	PIESP15	parasite-infected erythrocyte surface protein						PF3D7_1116000	RON4	rhoptry neck protein 4
PF3D7_0202100	LSAP2	liver stage associated protein 2						PF3D7_1116700	DPAP1	dipeptidyl aminopeptidase 1
PF3D7_0512300	MAT1	CDK-activating kinase assembly factor MAT1						PF3D7_1118300	N/A	insulinase, putative
PF3D7_1021400	N/A	endomembrane protein 70, putative						PF3D7_1118500	NOP56	nucleolar protein 56, putative
PF3D7_1136300	TSN	tudor staphylococcal nuclease						PF3D7_1118600	MYST	histone acetyltransferase MYST
PF3D7_1369400	N/A	conserved Plasmodium protein, unknown function						PF3D7_1119000	N/A	acyl-CoA-binding protein, putative
PF3D7_0814000	N/A	60S ribosomal protein L13-2, putative						PF3D7_1119100	N/A	tRNA m(1)G methyltransferase, putative
PF3D7_0935000	SNRPB2	U2 small nuclear ribonucleoprotein B'', putative						PF3D7_1119400	N/A	ubiquitin-protein ligase, putative
PF3D7_1337100	PK6	protein kinase 6						PF3D7_1119500	N/A	AP-4 complex subunit mu, putative
PF3D7_1411300	N/A	DnaJ protein, putative						PF3D7_1120500	N/A	tRNA nucleotidyltransferase, putative
PF3D7_1324900	LDH	L-lactate dehydrogenase						PF3D7_1121600	EXP1	exported protein 1
PF3D7_0515900	NIF2	NLI interacting factor-like phosphatase, putative						PF3D7_1121700	GCN20	protein GCN20
PF3D7_0527200	USP14	ubiquitin carboxyl-terminal hydrolase 14						PF3D7_1122800	CDPK6	calcium-dependent protein kinase 6
PF3D7_0613600	N/A	conserved Plasmodium protein, unknown function						PF3D7_1123500	GP2	golgi protein 2
PF3D7_0809200	pfa55-14	asparagine-rich antigen Pfa55-14						PF3D7_1123900	SNU13	13 kDa ribonucleoprotein-associated protein, putative
PF3D7_1353300	N/A	conserved Plasmodium protein, unknown function						PF3D7_1124200	N/A	thioredoxin-like protein, putative
PF3D7_0408500	FEN1	flap endonuclease 1						PF3D7_1124300	N/A	conserved protein, unknown function
PF3D7_0609000	NUP637	nucleoporin NUP637, putative						PF3D7_1124800	RRS1	ribosome biogenesis regulatory protein, putative
PF3D7_1232500	N/A	CG2-related protein, putative						PF3D7_1124900	RPL35	60S ribosomal protein L35, putative
PF3D7_1441300	N/A	serine/threonine protein kinase, putative						PF3D7_1126200	RPS18	40S ribosomal protein S18, putative
PF3D7_0216400	VPS45	vacuolar protein sorting-associated protein 45						PF3D7_1127000	N/A	protein phosphatase, putative
PF3D7_0711500	N/A	regulator of chromosome condensation, putative						PF3D7_1127100	dUTPase	deoxyuridine 5'-triphosphate nucleotidohydrolase
PF3D7_0731300	PfG174	Plasmodium exported protein (PHISTb), unknown function						PF3D7_1127900	N/A	conserved Plasmodium protein, unknown function
PF3D7_0818100	N/A	zinc finger protein, putative						PF3D7_1128100	N/A	prefoldin subunit 5, putative
PF3D7_0505700	N/A	conserved Plasmodium membrane protein, unknown function						PF3D7_1128200	MBF1	multiprotein-bridging factor 1, putative
PF3D7_1359100	N/A	riboflavin kinase, putative						PF3D7_1128600	NOT2	CCR4-NOT transcription complex subunit 2, putative
PF3D7_0813200	N/A	CS domain protein, putative						PF3D7_1129200	RPN7	26S proteasome regulatory subunit RPN7, putative
PF3D7_1250200	N/A	CSC1-like protein, putative						PF3D7_1130000	PAGM	phosphoacetylglucosamine mutase, putative
PF3D7_1224200	N/A	BRO1 domain-containing protein, putative						PF3D7_1130200	PfP0	60S ribosomal protein P0
PF3D7_1366600	SRPR-alpha	signal recognition particle receptor subunit alpha, putative						PF3D7_1130500	COG2	conserved oligomeric Golgi complex subunit 2, putative
PF3D7_1356800	ARK3	serine/threonine protein kinase ARK3, putative						PF3D7_1131500	N/A	conserved Plasmodium protein, unknown function
PF3D7_1359700	N/A	conserved Plasmodium protein, unknown function						PF3D7_1132000	N/A	ubiquitin-like protein, putative
PF3D7_1465100	COG6	conserved oligomeric Golgi complex subunit 6, putative						PF3D7_1132200	TCP1	T-complex protein 1 subunit alpha
PF3D7_1352000	N/A	GTP-binding protein, putative						PF3D7_1132300	N/A	nucleic acid binding protein, putative
PF3D7_0303100	N/A	CLP1 P-loop domain-containing protein, putative						PF3D7_1132400	N/A	conserved Plasmodium membrane protein, unknown function
PF3D7_1249800	THO2	THO complex subunit 2, putative						PF3D7_1132600	PRP38A	pre-mRNA-splicing factor 38A, putative
PF3D7_1369000	GPAA1	glycosylphosphatidylinositol anchor attachment 1 protein, putative						PF3D7_1133100	N/A	conserved Plasmodium protein, unknown function
PF3D7_1434000	CAF16	CCR4-associated factor 16, putative						PF3D7_1133300	CDC50B	LEM3/CDC50 family protein, putative
PF3D7_1223500	N/A	conserved Plasmodium protein, unknown function						PF3D7_1134600	N/A	zinc finger protein, putative
PF3D7_1224500	ASF1	histone chaperone ASF1						PF3D7_1135100	PPM8	protein phosphatase PPM8, putative
PF3D7_0613900	MyoE	myosin E, putative						PF3D7_1135300	N/A	conserved Plasmodium membrane protein, unknown function
PF3D7_0520700	N/A	CDC73 domain-containing protein, putative						PF3D7_1136500	CK1	casein kinase 1
PF3D7_0919100	N/A	DnaJ protein, putative						PF3D7_1136900	SUB2	subtilisin-like protease 2
PF3D7_1324300	N/A	conserved Plasmodium membrane protein, unknown function						PF3D7_1137800	SPELD	sporozoite surface protein essential for liver stage development, putative
PF3D7_1403700	TRAM	translocation associated membrane protein, putative						PF3D7_1138600	N/A	beta-catenin-like protein 1, putative
PF3D7_0113900	CBP1	CX3CL1-binding protein 1						PF3D7_1139100	N/A	RNA-binding protein, putative
PF3D7_1340200	N/A	conserved Plasmodium protein, unknown function						PF3D7_1140600	N/A	conserved Plasmodium protein, unknown function
PF3D7_1113000	N/A	conserved Plasmodium protein, unknown function						PF3D7_1140800	N/A	conserved Plasmodium protein, unknown function
PF3D7_1211200	N/A	conserved Plasmodium protein, unknown function						PF3D7_1141400	PIGH	phosphatidylinositol N-acetylglucosaminyltransferase subunit H, putative
PF3D7_1130000	PAGM	phosphoacetylglucosamine mutase, putative						PF3D7_1143200	N/A	DnaJ protein, putative
PF3D7_1475400	CRMP4	cysteine repeat modular protein 4						PF3D7_1143400	N/A	translation initiation factor eIF-1A, putative
PF3D7_0728000	eIF2alpha	eukaryotic translation initiation factor 2 subunit alpha						PF3D7_1143900	N/A	ATP-dependent (S)-NAD(P)H-hydrate dehydratase, putative
PF3D7_0903500	NUP138	nucleoporin NUP138, putative						PF3D7_1144000	RPS21	40S ribosomal protein S21
PF3D7_1419800	GR	glutathione reductase						PF3D7_1145000	N/A	conserved Plasmodium protein, unknown function
PF3D7_1119000	N/A	acyl-CoA-binding protein, putative						PF3D7_1145100	SEC21	coatomer subunit gamma, putative
PF3D7_1333200	UBA1	ubiquitin-activating enzyme						PF3D7_1145300	CRIPT	cysteine-rich PDZ-binding protein, putative
PF3D7_1443500	PARN	poly(A)-specific ribonuclease PARN, putative						PF3D7_1147500	FTB	protein farnesyltransferase subunit beta
PF3D7_0113700	HSP40	heat shock protein 40, type II						PF3D7_1147600	N/A	conserved Plasmodium protein, unknown function
PF3D7_1314200	TERT	telomerase reverse transcriptase						PF3D7_1148800	N/A	Plasmodium exported protein (hyp11), unknown function
PF3D7_1035700	DBLMSP	duffy binding-like merozoite surface protein						PF3D7_1149400	N/A	Plasmodium exported protein, unknown function
PF3D7_0731800	GEXP08	alpha/beta hydrolase, putative						PF3D7_1149600	N/A	DnaJ protein, putative
PF3D7_1033200	ETRAMP10.2	early transcribed membrane protein 10.2						PF3D7_1201100	N/A	RESA-like protein with PHIST and DnaJ domains
PF3D7_1314100	N/A	conserved Plasmodium protein, unknown function						PF3D7_1201500	N/A	GPN-loop GTPase, putative
PF3D7_1360700	PIAS	E3 SUMO-protein ligase PIAS, putative						PF3D7_1202300	N/A	dynein heavy chain, putative
PF3D7_1465200	MED4	mediator of RNA polymerase II transcription subunit 4, putative						PF3D7_1202700	N/A	AATF domain-containing protein, putative
PF3D7_1121700	GCN20	protein GCN20						PF3D7_1203000	ORC1	origin recognition complex subunit 1
PF3D7_1106700	DNA2	DNA replication ATP-dependent helicase/nuclease DNA2, putative						PF3D7_1203100	N/A	conserved Plasmodium protein, unknown function
PF3D7_0111600	N/A	conserved Plasmodium protein, unknown function						PF3D7_1203300	N/A	TBCC domain-containing protein, putative
PF3D7_0719700	RPS10	40S ribosomal protein S10, putative						PF3D7_1203900	UBC	ubiquitin-conjugating enzyme E2
PF3D7_0905400	RhopH3	high molecular weight rhoptry protein 3						PF3D7_1204100	N/A	conserved Plasmodium protein, unknown function
PF3D7_1010300	SDH4	succinate dehydrogenase subunit 4, putative						PF3D7_1205200	HADO	HAD domain ookinete protein, putative
PF3D7_1012400	HGPRT	hypoxanthine-guanine phosphoribosyltransferase						PF3D7_1205400	N/A	kelch domain-containing protein, putative
PF3D7_1002100	PTP5	EMP1-trafficking protein						PF3D7_1207400	N/A	conserved Plasmodium protein, unknown function
PF3D7_1337400	N/A	zinc finger protein, putative						PF3D7_1209400	CIA1	cytosolic iron-sulfur protein assembly protein 1, putative
PF3D7_0221200	N/A	Plasmodium exported protein (hyp15), unknown function						PF3D7_1209500	PDEalpha	cGMP-specific 3',5'-cyclic phosphodiesterase alpha
PF3D7_0530300	PIC6	PhIL1-interacting candidate PIC6						PF3D7_1210600	N/A	kelch protein, putative
PF3D7_0500800	MESA	mature parasite-infected erythrocyte surface antigen						PF3D7_1211000	N/A	kinesin-X3, putative
PF3D7_1250800	N/A	DNA repair protein rhp16, putative						PF3D7_1211600	LSD1	lysine-specific histone demethylase 1, putative
PF3D7_1410900	N/A	ribosome maturation protein SBDS, putative						PF3D7_1211800	PfpUB	polyubiquitin
PF3D7_1446400	pdhB	pyruvate dehydrogenase E1 component subunit beta						PF3D7_1212400	N/A	tetratricopeptide repeat protein, putative
PF3D7_1024800	EXP3	exported protein 3						PF3D7_1212500	GAT	glycerol-3-phosphate 1-O-acyltransferase
PF3D7_0911400	N/A	conserved Plasmodium protein, unknown function						PF3D7_1213200	MED18	mediator of RNA polymerase II transcription subunit 18, putative
PF3D7_0618500	MDH	malate dehydrogenase						PF3D7_1213400	N/A	kelch domain-containing protein, putative
PF3D7_0912800	GCD10	tRNA (adenine(58)-N(1))-methyltransferase non-catalytic subunit TRM6, putative						PF3D7_1213800	PRS	proline--tRNA ligase
PF3D7_0917900	BIP	heat shock protein 70						PF3D7_1213900	N/A	W2 domain-containing protein, putative
PF3D7_0317200	CRK4	cdc2-related protein kinase 4						PF3D7_1215400	N/A	conserved Plasmodium protein, unknown function
PF3D7_0727800	N/A	cation transporting ATPase, putative						PF3D7_1216300	SRP19	signal recognition particle subunit SRP19
PF3D7_1362500	EXO	3'-5' exonuclease, putative						PF3D7_1216400	N/A	conserved Plasmodium membrane protein, unknown function
PF3D7_1367700	AlaRS	alanine--tRNA ligase						PF3D7_1217400	N/A	conserved protein, unknown function
PF3D7_1020900	ARF1	ADP-ribosylation factor 1						PF3D7_1217500	N/A	conserved Plasmodium protein, unknown function
PF3D7_0528200	EIF3E	eukaryotic translation initiation factor 3 subunit E, putative						PF3D7_1217900	N/A	PPPDE peptidase domain-containing protein, putative
PF3D7_1009400	ZNF2	zinc finger protein, putative						PF3D7_1218200	N/A	symplekin domain-containing protein, putative
PF3D7_1105300	N/A	conserved Plasmodium protein, unknown function						PF3D7_1218300	AP2-MU	AP-2 complex subunit mu
PF3D7_1433100	N/A	HID1 domain-containing protein, putative						PF3D7_1218400	N/A	triose or hexose phosphate/phosphate translocator, putative
PF3D7_0705500	N/A	inositol-phosphate phosphatase, putative						PF3D7_1218900	N/A	WD repeat-containing protein, putative
PF3D7_0914000	N/A	pseudouridylate synthase, putative						PF3D7_1220100	PRP17	pre-mRNA-processing factor 17, putative
PF3D7_1226900	PV2	parasitophorous vacuolar protein 2						PF3D7_1220400	DRN1	debranching enzyme-associated ribonuclease, putative
PF3D7_1453700	P23	HSP90 co-chaperone p23						PF3D7_1220500	TSR3	ribosome biogenesis protein TSR3, putative
PF3D7_1364400	N/A	conserved Plasmodium protein, unknown function						PF3D7_1221400	IMC1h	inner membrane complex protein 1h, putative
PF3D7_1205800	HMGB3	high mobility group protein B3, putative						PF3D7_1221900	N/A	conserved Plasmodium membrane protein, unknown function
PF3D7_1329500	N/A	conserved protein, unknown function						PF3D7_1222400	ApiAP2	AP2 domain transcription factor
PF3D7_1020700	N/A	N-acetyltransferase, GNAT family, putative						PF3D7_1223000	N/A	conserved Plasmodium protein, unknown function
PF3D7_1237200	N/A	conserved Plasmodium protein, unknown function						PF3D7_1223500	N/A	conserved Plasmodium protein, unknown function
PF3D7_0618900	GPI1	phosphatidylinositol N-acetylglucosaminyltransferase subunit GPI1						PF3D7_1224100	N/A	conserved protein, unknown function
PF3D7_1008500	N/A	protein GPR89, putative						PF3D7_1224200	N/A	BRO1 domain-containing protein, putative
PF3D7_1474500	SF3A1	splicing factor 3A subunit 1, putative						PF3D7_1224400	N/A	WD repeat-containing protein, putative
PF3D7_0911900	ICP	falstatin						PF3D7_1224700	N/A	conserved Plasmodium protein, unknown function
PF3D7_1324500	N/A	DEAD box helicase, putative						PF3D7_1225200	N/A	DNA-binding protein, putative
PF3D7_0824900	N/A	conserved Plasmodium protein, unknown function						PF3D7_1225500	N/A	small subunit rRNA processing factor, putative
PF3D7_0503500	N/A	protein kinase, putative						PF3D7_1225600	N/A	conserved Plasmodium protein, unknown function
PF3D7_0823300	GCN5	histone acetyltransferase GCN5						PF3D7_1225800	UBA1	ubiquitin-activating enzyme E1
PF3D7_1421000	DIX	DIX domain-containing protein, putative						PF3D7_1226000	N/A	conserved protein, unknown function
PF3D7_0204200	SEC66	translocation protein SEC66, putative						PF3D7_1226300	HAD2	haloacid dehalogenase-like hydrolase, putative
PF3D7_1333100	N/A	conserved Plasmodium protein, unknown function						PF3D7_1226500	N/A	heptatricopeptide repeat and RAP domain-containing protein, putative
PF3D7_1338100	RPN3	26S proteasome regulatory subunit RPN3, putative						PF3D7_1226700	RRP9	U3 small nucleolar RNA-interacting protein 2, putative
PF3D7_1237900	N/A	conserved Plasmodium protein, unknown function						PF3D7_1226800	ATX3	ataxin-3, putative
PF3D7_0719900	N/A	conserved Plasmodium membrane protein, unknown function						PF3D7_1226900	PV2	parasitophorous vacuolar protein 2
PF3D7_0704400	N/A	phosphoinositide-binding protein, putative						PF3D7_1227400	N/A	conserved Plasmodium protein, unknown function
PF3D7_1147500	FTB	protein farnesyltransferase subunit beta						PF3D7_1228100	LRR13	leucine-rich repeat protein
PF3D7_1451800	SORTLR	sortilin						PF3D7_1228300	NEK1	NIMA related kinase 1
PF3D7_1212500	GAT	glycerol-3-phosphate 1-O-acyltransferase						PF3D7_1229300	PIC1	PhIL1-interacting candidate PIC1
PF3D7_1114500	N/A	conserved Plasmodium protein, unknown function						PF3D7_1229500	CCT3	T-complex protein 1 subunit gamma
PF3D7_0827900	PDI8	protein disulfide-isomerase						PF3D7_1230000	N/A	TBC domain-containing protein, putative
PF3D7_0717200	N/A	conserved Plasmodium protein, unknown function						PF3D7_1230100	TLAP1	thioredoxin-like associated protein 1, putative
PF3D7_0304800	N/A	conserved Plasmodium membrane protein, unknown function						PF3D7_1231100	RAB2	ras-related protein Rab-2
PF3D7_0826100	HEUL	HECT-like E3 ubiquitin ligase, putative						PF3D7_1231400	ICM1	membrane protein ICM1
PF3D7_1318000	N/A	conserved protein, unknown function						PF3D7_1232300	N/A	cytochrome b5, putative
PF3D7_1236800	ICMT	protein-S-isoprenylcysteine O-methyltransferase						PF3D7_1232400	N/A	CWC16 domain-containing protein, putative
PF3D7_0804900	N/A	GTPase-activating protein, putative						PF3D7_1232500	N/A	CG2-related protein, putative
PF3D7_0823000	VPS15	serine/threonine protein kinase VPS15, putative						PF3D7_1233100	N/A	conserved protein, unknown function
PF3D7_1243400	N/A	conserved Plasmodium protein, unknown function						PF3D7_1233800	N/A	conserved protein, unknown function
PF3D7_1457000	SPP	signal peptide peptidase						PF3D7_1234500	N/A	conserved Plasmodium protein, unknown function
PF3D7_0628500	N/A	conserved Plasmodium protein, unknown function						PF3D7_1234900	N/A	CHCH domain-containing protein, putative
PF3D7_1242300	N/A	conserved Plasmodium membrane protein, unknown function						PF3D7_1235200	VP2	V-type K+-independent H+-translocating inorganic pyrophosphatase
PF3D7_1471100	EXP2	exported protein 2						PF3D7_1235500	MT-A70.2	N6-adenosine-methyltransferase, putative
PF3D7_0817500	HINT1	histidine triad nucleotide-binding protein 1						PF3D7_1235900	XAB2	pre-mRNA-splicing factor SYF1, putative
PF3D7_1462800	GAPDH	glyceraldehyde-3-phosphate dehydrogenase						PF3D7_1236100	CARP	clustered-asparagine-rich protein
PF3D7_0316900	N/A	E3 ubiquitin-protein ligase, putative						PF3D7_1236800	ICMT	protein-S-isoprenylcysteine O-methyltransferase
PF3D7_0934100	XPD	TFIIH basal transcription factor complex helicase XPD subunit						PF3D7_1237000	UBA2	SUMO-activating enzyme subunit 2
PF3D7_1423200	CYP52	peptidyl-prolyl cis-trans isomerase						PF3D7_1237200	N/A	conserved Plasmodium protein, unknown function
PF3D7_1334000	N/A	RING zinc finger protein, putative						PF3D7_1238300	CWC22	pre-mRNA-splicing factor CWC22, putative
PF3D7_1311400	AP1M1	AP-1 complex subunit mu-1						PF3D7_1238700	N/A	BTB/POZ domain-containing protein, putative
PF3D7_1436100	N/A	conserved Plasmodium membrane protein, unknown function						PF3D7_1238800	ACS11	acyl-CoA synthetase
PF3D7_0424500	FIKK4.1	serine/threonine protein kinase, FIKK family						PF3D7_1238900	PK2	protein kinase 2
PF3D7_1213900	N/A	W2 domain-containing protein, putative						PF3D7_1239700	FTSH1	ATP-dependent zinc metalloprotease FTSH 1
PF3D7_1361100	SEC24A	protein transport protein Sec24A						PF3D7_1241400	N/A	RNA-binding protein, putative
PF3D7_0104100	N/A	protein E140, putative						PF3D7_1241900	N/A	tetratricopeptide repeat protein, putative
PF3D7_1315900	N/A	exportin-T, putative						PF3D7_1242300	N/A	conserved Plasmodium membrane protein, unknown function
PF3D7_0605900	N/A	elongation of fatty acids protein, putative						PF3D7_1242700	N/A	40S ribosomal protein S17, putative
PF3D7_1472300	N/A	conserved protein, unknown function						PF3D7_1243100	N/A	zinc finger protein, putative
PF3D7_1019500	N/A	TMEM94 domain-containing protein, putative						PF3D7_1243400	N/A	conserved Plasmodium protein, unknown function
PF3D7_0106100	N/A	V-type proton ATPase subunit C, putative						PF3D7_1243500	SNF7	vacuolar-sorting protein SNF7, putative
PF3D7_0424700	FIKK4.2	serine/threonine protein kinase, FIKK family						PF3D7_1243600	N/A	translation initiation factor SUI1, putative
PF3D7_0522400	N/A	conserved Plasmodium protein, unknown function						PF3D7_1244100	N/A	N-alpha-acetyltransferase 15, NatA auxiliary subunit, putative
PF3D7_0419900	N/A	phosphatidylinositol 4-kinase, putative						PF3D7_1244200	TFB2	RNA polymerase II transcription factor B subunit 2, putative
PF3D7_1126000	ThrRS	threonine--tRNA ligase						PF3D7_1244700	N/A	conserved protein, unknown function
PF3D7_1002000	N/A	Plasmodium exported protein (hyp2), unknown function						PF3D7_1245500	N/A	conserved Plasmodium protein, unknown function
PF3D7_1213800	PRS	proline--tRNA ligase						PF3D7_1245800	EpsL	epsin-like protein, putative
PF3D7_0319000	ATPase7	P4-type ATPase ATP7, putative						PF3D7_1246400	MTIP	myosin A-tail interacting protein
PF3D7_0918900	gammaGCS	gamma-glutamylcysteine synthetase						PF3D7_1246600	BUD13	pre-mRNA-splicing factor CWC26, putative
PF3D7_1242600	N/A	protein farnesyltransferase subunit alpha						PF3D7_1247400	FKBP35	peptidyl-prolyl cis-trans isomerase FKBP35
PF3D7_1141400	PIGH	phosphatidylinositol N-acetylglucosaminyltransferase subunit H, putative						PF3D7_1248200	RBM22	pre-mRNA-splicing factor RBM22, putative
PF3D7_0513300	PNP	purine nucleoside phosphorylase						PF3D7_1248400	N/A	conserved Plasmodium protein, unknown function
PF3D7_1368800	ERCC4	DNA repair endonuclease XPF, putative						PF3D7_1248500	N/A	bax inhibitor 1, putative
PF3D7_1032500	Der1-2	DER1-like protein, putative						PF3D7_1249600	LRR12	leucine-rich repeat protein
PF3D7_1121900	PDK1	3-phosphoinositide-dependent protein kinase 1						PF3D7_1250800	N/A	DNA repair protein rhp16, putative
PF3D7_1453800	GluPho	glucose-6-phosphate dehydrogenase-6-phosphogluconolactonase						PF3D7_1251100	N/A	conserved Plasmodium protein, unknown function
PF3D7_1218200	N/A	symplekin domain-containing protein, putative						PF3D7_1251500	DRS1	ATP-dependent RNA helicase DRS1, putative
PF3D7_1440400	N/A	zinc finger protein, putative						PF3D7_1251600	N/A	conserved Plasmodium protein, unknown function
PF3D7_1462900	N/A	AAA ATPase, putative						PF3D7_1251800	N/A	conserved Plasmodium protein, unknown function
PF3D7_1455500	N/A	AP-1 complex subunit gamma, putative						PF3D7_1302700	N/A	ATP-dependent RNA helicase DHR1, putative
PF3D7_0108800	N/A	mitochondrial carrier protein, putative						PF3D7_1302800	N/A	40S ribosomal protein S7, putative
PF3D7_0811300	CAF1	CCR4-associated factor 1						PF3D7_1304900	RPB11	DNA-directed RNA polymerase II subunit RPB11, putative
PF3D7_0826500	UBE4B	ubiquitin conjugation factor E4 B, putative						PF3D7_1305600	S2P	site-2 protease S2P, putative
PF3D7_1406100	N/A	tubby domain-containing protein, putative						PF3D7_1305900	N/A	conserved Plasmodium protein, unknown function
PF3D7_0926400	N/A	monocarboxylate transporter, putative						PF3D7_1306300	N/A	SAM dependent methyltransferase, putative
PF3D7_1427500	MSH2-1	DNA mismatch repair protein MSH2, putative						PF3D7_1307100	UTP6	U3 small nucleolar RNA-associated protein 6, putative
PF3D7_0935200	VPS33	vacuolar protein sorting-associated protein 33, putative						PF3D7_1307800	CEP170	centrosomal protein CEP170, putative
PF3D7_1422500	HRD1	ERAD-associated E3 ubiquitin-protein ligase HRD1						PF3D7_1308100	N/A	CCAAT-binding transcription factor, putative
PF3D7_1323700	GAPM1	glideosome associated protein with multiple membrane spans 1						PF3D7_1308300	RPS27	40S ribosomal protein S27
PF3D7_0827300	N/A	conserved Plasmodium protein, unknown function						PF3D7_1309100	N/A	60S ribosomal protein L24, putative
PF3D7_0910300	N/A	conserved protein, unknown function						PF3D7_1309400	N/A	HORMA domain protein, putative
PF3D7_1344900	N/A	conserved Plasmodium protein, unknown function						PF3D7_1309700	VPS18	vacuolar protein sorting-associated protein 18, putative
PF3D7_0628300	CEPT	choline/ethanolaminephosphotransferase, putative						PF3D7_1313000	NEDD8	ubiquitin-like protein Nedd8
PF3D7_0724700	BDP6	bromodomain protein 6, putative						PF3D7_1313500	N/A	conserved Plasmodium membrane protein, unknown function
PF3D7_1012500	N/A	phosphoglucomutase, putative						PF3D7_1313600	N/A	Clu domain-containing protein, putative
PF3D7_1030200	CLAMP	claudin-like apicomplexan microneme protein, putative						PF3D7_1313700	N/A	Maf-like protein, putative
PF3D7_1458300	N/A	alpha/beta hydrolase, putative						PF3D7_1314200	TERT	telomerase reverse transcriptase
PF3D7_1244100	N/A	N-alpha-acetyltransferase 15, NatA auxiliary subunit, putative						PF3D7_1316900	N/A	conserved protein, unknown function
PF3D7_0933200	N/A	calcyclin-binding protein, putative						PF3D7_1317000	USP39	U4/U6.U5 tri-snRNP-associated protein 2, putative
PF3D7_1014300	N/A	SPRY domain-containing protein, putative						PF3D7_1317900	NOC4	nucleolar complex protein 4, putative
PF3D7_0525800	IMC1g	inner membrane complex protein 1g, putative						PF3D7_1318000	N/A	conserved protein, unknown function
PF3D7_0924100	N/A	conserved Plasmodium protein, unknown function						PF3D7_1319000	N/A	conserved Plasmodium protein, unknown function
PF3D7_1112100	N/A	conserved Plasmodium protein, unknown function						PF3D7_1319300	TRM1	tRNA (guanine(26)-N(2))-dimethyltransferase, putative
PF3D7_0914300	N/A	met-10+ like protein, putative						PF3D7_1319400	N/A	conserved protein, unknown function
PF3D7_0609100	ZIP1	zinc transporter ZIP1, putative						PF3D7_1319600	N/A	ACDC domain-containing protein, putative
PF3D7_0318200	RPB1	DNA-directed RNA polymerase II subunit RPB1						PF3D7_1319900	N/A	conserved Plasmodium protein, unknown function
PF3D7_1338000	N/A	LMBR1 domain-containing protein, putative						PF3D7_1320200	N/A	TBC domain protein, putative
PF3D7_1313800	N/A	conserved Plasmodium membrane protein, unknown function						PF3D7_1320500	SNAP23	SNARE protein, putative
PF3D7_0216800	N/A	TMEM121 domain-containing protein, putative						PF3D7_1320600	RAB11a	ras-related protein Rab-11A
PF3D7_1118300	N/A	insulinase, putative						PF3D7_1320900	N/A	RNA-binding protein, putative
PF3D7_1364000	N/A	conserved protein, unknown function						PF3D7_1321100	N/A	protein kinase domain-containing protein, putative
PF3D7_0603000	N/A	SDE2 domain-containing protein, putative						PF3D7_1321200	N/A	zinc finger protein, putative
PF3D7_1358700	YOP1L	YOP1-like protein, putative						PF3D7_1321600	PDEgamma	cGMP-specific 3',5'-cyclic phosphodiesterase gamma, putative
PF3D7_0922800	N/A	conserved Plasmodium protein, unknown function						PF3D7_1322100	SET2	histone-lysine N-methyltransferase SET2
PF3D7_0613700	N/A	syntaxin-binding protein, putative						PF3D7_1322600	N/A	conserved Plasmodium protein, unknown function
PF3D7_1425400	N/A	DEAD/DEAH box helicase, putative						PF3D7_1323300	N/A	N-acetyltransferase, GNAT family, putative
PF3D7_0618600	ROM10	rhomboid protease ROM10						PF3D7_1324300	N/A	conserved Plasmodium membrane protein, unknown function
PF3D7_0214800	N/A	conserved Plasmodium membrane protein, unknown function						PF3D7_1324500	N/A	DEAD box helicase, putative
PF3D7_0814500	N/A	conserved protein, unknown function						PF3D7_1324600	N/A	conserved Plasmodium protein, unknown function
PF3D7_0613300	ROP14	rhoptry protein ROP14						PF3D7_1324900	LDH	L-lactate dehydrogenase
PF3D7_1452600	N/A	conserved Plasmodium protein, unknown function						PF3D7_1327500	N/A	conserved protein, unknown function
PF3D7_0924500	N/A	conserved Plasmodium membrane protein, unknown function						PF3D7_1327600	NMNAT	nicotinamide/nicotinic acid mononucleotide adenylyltransferase
								PF3D7_1330000	N/A	PITH domain-containing protein, putative
								PF3D7_1330400	N/A	ER lumen protein retaining receptor 1, putative
								PF3D7_1330500	N/A	CTLH domain-containing protein, putative
								PF3D7_1331200	N/A	conserved Plasmodium protein, unknown function
								PF3D7_1331300	SEC11	signal peptidase complex catalytic subunit SEC11
								PF3D7_1331500	N/A	conserved Plasmodium protein, unknown function
								PF3D7_1332000	SYN5	syntaxin, Qa-SNARE family
								PF3D7_1332400	N/A	nucleotidyltransferase, putative
								PF3D7_1332600	APN1	DNA-(apurinic or apyrimidinic site) lyase 1
								PF3D7_1332800	N/A	eukaryotic translation initiation factor 6, putative
								PF3D7_1332900	cyto-IRS	isoleucine--tRNA ligase, putative
								PF3D7_1333100	N/A	conserved Plasmodium protein, unknown function
								PF3D7_1333200	UBA1	ubiquitin-activating enzyme
								PF3D7_1333800	N/A	Voldacs domain-containing protein, putative
								PF3D7_1334000	N/A	RING zinc finger protein, putative
								PF3D7_1334300	MSRP5	MSP7-like protein
								PF3D7_1334500	MSRP6	MSP7-like protein
								PF3D7_1335000	MSRP1	MSP7-like protein
								PF3D7_1335700	COG3	conserved oligomeric Golgi complex subunit 3, putative
								PF3D7_1335800	N/A	conserved Plasmodium protein, unknown function
								PF3D7_1337100	PK6	protein kinase 6
								PF3D7_1337800	CDPK5	calcium-dependent protein kinase 5
								PF3D7_1338000	N/A	LMBR1 domain-containing protein, putative
								PF3D7_1338100	RPN3	26S proteasome regulatory subunit RPN3, putative
								PF3D7_1338300	EF-1gamma	elongation factor 1-gamma, putative
								PF3D7_1339900	ABCB5	ABC transporter B family member 5, putative
								PF3D7_1340200	N/A	conserved Plasmodium protein, unknown function
								PF3D7_1340700	RAB11b	ras-related protein Rab-11B
								PF3D7_1341200	N/A	60S ribosomal protein L18, putative
								PF3D7_1341500	ISC1	inner membrane complex suture component, putative
								PF3D7_1341800	IMC1k	inner membrane complex protein 1k, putative
								PF3D7_1342400	CK2beta2	casein kinase II beta chain
								PF3D7_1343400	RAD5	DNA repair protein RAD5, putative
								PF3D7_1344200	GRP170	endoplasmic reticulum chaperone GRP170
								PF3D7_1344300	N/A	zinc finger protein, putative
								PF3D7_1347300	N/A	conserved Plasmodium membrane protein, unknown function
								PF3D7_1347500	ALBA4	DNA/RNA-binding protein Alba 4
								PF3D7_1347700	ECT	ethanolamine-phosphate cytidylyltransferase
								PF3D7_1348400	N/A	conserved Plasmodium membrane protein, unknown function
								PF3D7_1349800	N/A	GPN-loop GTPase, putative
								PF3D7_1350900	ApiAP2	AP2 domain transcription factor AP2-O4, putative
								PF3D7_1351900	N/A	conserved protein, unknown function
								PF3D7_1352000	N/A	GTP-binding protein, putative
								PF3D7_1355700	NIF3	NLI interacting factor-like phosphatase, putative
								PF3D7_1356400	N/A	phosphatase 2A regulatory subunit-related protein, putative
								PF3D7_1356900	PK5	protein kinase 5
								PF3D7_1357700	UTP21	U3 small nucleolar RNA-associated protein 21, putative
								PF3D7_1358100	N/A	Sas10 domain-containing protein, putative
								PF3D7_1358200	N/A	conserved Plasmodium protein, unknown function
								PF3D7_1358400	N/A	conserved Plasmodium protein, unknown function
								PF3D7_1358500	N/A	zinc finger protein, putative
								PF3D7_1358700	YOP1L	YOP1-like protein, putative
								PF3D7_1360100	RRM1	RNA-binding protein, putative
								PF3D7_1361400	ADF2	actin-depolymerizing factor 2
								PF3D7_1361800	GAC	glideosome-associated connector
								PF3D7_1361900	PCNA1	proliferating cell nuclear antigen 1
								PF3D7_1362200	RUVB3	RuvB-like helicase 3
								PF3D7_1362400	Pcalp	calpain
								PF3D7_1362500	EXO	3'-5' exonuclease, putative
								PF3D7_1363100	N/A	conserved Plasmodium protein, unknown function
								PF3D7_1363400	DOA1	polyubiquitin binding protein, putative
								PF3D7_1363500	CCR4-2	CCR4 domain-containing protein 2, putative
								PF3D7_1364300	PRP16	pre-mRNA-splicing factor ATP-dependent RNA helicase PRP16
								PF3D7_1366100	DIP13	DIP13 homolog, putative
								PF3D7_1366300	N/A	conserved Plasmodium protein, unknown function
								PF3D7_1366400	RHOP148	rhoptry protein RHOP148
								PF3D7_1366500	NDK	nucleoside diphosphate kinase
								PF3D7_1367400	N/A	conserved Plasmodium protein, unknown function
[truncated: 148 more rows]

## Sheet: nrPhosphoproteins
PhosphoProtein	Name	Product
PF3D7_0407800	CINCH	protein CINCH
PF3D7_0729100	N/A	allantoicase, putative
PF3D7_1467900	N/A	rab GTPase activator, putative
PF3D7_0609000	NUP637	nucleoporin NUP637, putative
PF3D7_1230700	SEC13	protein transport protein SEC13
PF3D7_0613300	ROP14	rhoptry protein ROP14
PF3D7_0109000	PHIL1	photosensitized INA-labeled protein PHIL1
PF3D7_1022400	SRSF4	serine/arginine-rich splicing factor 4
PF3D7_1336400	N/A	RanBPM and CLTH-like protein, putative
PF3D7_0723300	N/A	conserved protein, unknown function
PF3D7_0927200	N/A	zinc finger protein, putative
PF3D7_0615900	N/A	protein phosphatase, putative
PF3D7_1410400	RAP1	rhoptry-associated protein 1
PF3D7_1321500	PDEbeta	3',5'-cyclic nucleotide phosphodiesterase beta
PF3D7_0709000	CRT	chloroquine resistance transporter
PF3D7_1251200	N/A	coronin
PF3D7_0812400	KARalpha	karyopherin alpha
PF3D7_0803200	N/A	filament assembling protein, putative
PF3D7_0508000	P38	6-cysteine protein
PF3D7_1003600	IMC1c	inner membrane complex protein 1c, putative
PF3D7_1018600	N/A	tRNA wybutosine-synthesizing protein, putative
PF3D7_1462400	N/A	conserved Plasmodium protein, unknown function
PF3D7_0106700	AARP2	small ribosomal subunit assembling AARP2 protein
PF3D7_1348900	N/A	conserved Plasmodium protein, unknown function
PF3D7_0618000	N/A	conserved Plasmodium membrane protein, unknown function
PF3D7_0906300	N/A	Maf-like protein, putative
PF3D7_0609700	KIC6	protein KIC6
PF3D7_0422300	N/A	alpha tubulin 2
PF3D7_1026600	N/A	conserved Plasmodium protein, unknown function
PF3D7_1405700	N/A	RING zinc finger protein, putative
PF3D7_0606000	KIC1	protein KIC1
PF3D7_1409800	CELF2	CUGBP Elav-like family member 2, putative
PF3D7_1235300	NOT4	CCR4-NOT transcription complex subunit 4, putative
PF3D7_0714200	N/A	conserved Plasmodium protein, unknown function
PF3D7_0727800	N/A	cation transporting ATPase, putative
PF3D7_1116100	N/A	serine esterase, putative
PF3D7_0303200	N/A	lipin, putative
PF3D7_0532100	ETRAMP5	early transcribed membrane protein 5
PF3D7_0506900	ROM4	rhomboid protease ROM4
PF3D7_0107500	NCR1	Niemann-Pick type C1-related protein
PF3D7_1227700	KIC2	protein KIC2
PF3D7_1308900	DCP2	mRNA-decapping enzyme 2, putative
PF3D7_0619400	N/A	cell division cycle protein 48 homologue, putative
PF3D7_1322200	N/A	TOG domain-containing protein, putative
PF3D7_1112400	N/A	nucleic acid binding protein, putative
PF3D7_0801800	N/A	mannose-6-phosphate isomerase, putative
PF3D7_0903500	NUP138	nucleoporin NUP138, putative
PF3D7_0423500	GAPM2	glideosome associated protein with multiple membrane spans 2
PF3D7_0202600	N/A	nucleic acid-binding protein, putative
PF3D7_1319100	N/A	ubiquitin carboxyl-terminal hydrolase MINDY, putative
PF3D7_1138000	N/A	conserved Plasmodium protein, unknown function
PF3D7_1227200	K1	potassium channel K1
PF3D7_0517400	FACT-L	FACT complex subunit SPT16, putative
PF3D7_0628100	HECT1	HECT domain-containing protein 1, putative
PF3D7_1343800	N/A	VPS13 domain-containing protein, putative
PF3D7_1357500	N/A	DNA helicase, putative
PF3D7_0918700	N/A	conserved Plasmodium protein, unknown function
PF3D7_0508100	SET9	SET domain protein, putative
PF3D7_0314700	RNF1	RING finger protein RNF1
PF3D7_1136800	N/A	DnaJ protein, putative
PF3D7_0826900	N/A	conserved Plasmodium protein, unknown function
PF3D7_0914000	N/A	pseudouridylate synthase, putative
PF3D7_1409900	CDS	cytidine diphosphate-diacylglycerol synthase
PF3D7_1357400	N/A	conserved Plasmodium protein, unknown function
PF3D7_1229100	MRP2	multidrug resistance-associated protein 2
PF3D7_1466400	ApiAP2	AP2 domain transcription factor AP2-EXP
PF3D7_0904900	CuTP	copper-transporting ATPase
PF3D7_1110200	PRPF6	pre-mRNA-processing factor 6, putative
PF3D7_0813000	KIC7	protein KIC7
PF3D7_1343300	N/A	CDT1-like protein, putative
PF3D7_1302500	N/A	AAA domain-containing protein, putative
PF3D7_1362800	N/A	conserved Plasmodium protein, unknown function
PF3D7_1304500	N/A	small heat shock protein, putative
PF3D7_0802000	GDH3	glutamate dehydrogenase, putative
PF3D7_0715900	CDF	cation diffusion facilitator family protein, putative
PF3D7_1021800	SEA1	schizont egress antigen-1
PF3D7_0103200	NT4	nucleoside transporter 4
PF3D7_0613800	ApiAP2	AP2 domain transcription factor, putative
PF3D7_1130400	RPT5	26S protease regulatory subunit 6A, putative
PF3D7_1353200	MAHRP2	membrane associated histidine-rich protein 2
PF3D7_1310400	N/A	conserved Plasmodium protein, unknown function
PF3D7_1249300	PPM4	protein phosphatase PPM4, putative
PF3D7_1329500	N/A	conserved protein, unknown function
PF3D7_1356800	ARK3	serine/threonine protein kinase ARK3, putative
PF3D7_1308400	N/A	conserved Plasmodium protein, unknown function
PF3D7_0319000	ATPase7	P4-type ATPase ATP7, putative
PF3D7_1133200	N/A	conserved Plasmodium protein, unknown function
PF3D7_1110400	N/A	RNA-binding protein, putative
PF3D7_0826100	HEUL	HECT-like E3 ubiquitin ligase, putative
PF3D7_1008100	PHD1	PHD finger protein PHD1
PF3D7_0813900	RPS16	40S ribosomal protein S16, putative
PF3D7_0413900	USP13	ubiquitin carboxyl-terminal hydrolase 13, putative
PF3D7_1366600	SRPR-alpha	signal recognition particle receptor subunit alpha, putative
PF3D7_1205900	N/A	conserved protein, unknown function
PF3D7_1346300	ALBA2	DNA/RNA-binding protein Alba 2
PF3D7_0305500	N/A	protein dopey homolog, putative
PF3D7_1436600	PKG	cGMP-dependent protein kinase
PF3D7_0719700	RPS10	40S ribosomal protein S10, putative
PF3D7_0705500	N/A	inositol-phosphate phosphatase, putative
PF3D7_0815800	VPS9	vacuolar protein sorting-associated protein 9, putative
PF3D7_0825000	N/A	conserved Plasmodium protein, unknown function
PF3D7_0922100	N/A	ubiquitin-like protein, putative
PF3D7_0821800	SEC61B	protein transport protein SEC61 subunit beta, putative
PF3D7_1126700	ATG23	conserved Plasmodium protein, unknown function
PF3D7_0919000	NAPS	nucleosome assembly protein
PF3D7_0817500	HINT1	histidine triad nucleotide-binding protein 1
PF3D7_1202900	HMGB1	high mobility group protein B1
PF3D7_0717600	IMC32	inner membrane complex protein, putative
PF3D7_0206000	RAD2	DNA repair protein RAD2, putative
PF3D7_1002900	N/A	conserved Plasmodium protein, unknown function
PF3D7_0308300	PIC4	PhIL1-interacting candidate PIC4
PF3D7_0219600	RFC1	replication factor C subunit 1
PF3D7_1149000	Pf332	antigen 332, DBL-like protein
PF3D7_1473200	N/A	DnaJ protein, putative
PF3D7_1470100	N/A	conserved Plasmodium protein, unknown function
PF3D7_1019100	N/A	conserved Plasmodium protein, unknown function
PF3D7_1107300	PAIP1	polyadenylate-binding protein-interacting protein 1, putative
PF3D7_1468100	MORC	MORC family protein
PF3D7_0808100	N/A	AP-3 complex subunit delta, putative
PF3D7_1114900	N/A	filamin domain-containing protein, putative
PF3D7_0504000	ATPase3	cation transporting P-ATPase
PF3D7_1105100	H2B	histone H2B
PF3D7_0529800	N/A	conserved Plasmodium protein, unknown function
PF3D7_1442400	KIC9	protein KIC9
PF3D7_1433400	PHD2	PHD finger protein PHD2, putative
PF3D7_0321600	DDX42	ATP-dependent RNA helicase DDX42, putative
PF3D7_0726400	N/A	conserved Plasmodium membrane protein, unknown function
PF3D7_1436200	BCP1	basal complex protein BCP1
PF3D7_1351000	N/A	phosphatidylinositol transfer protein, putative
PF3D7_0830500	TryThrA	sporozoite and liver stage tryptophan-rich protein, putative
PF3D7_1417700	N/A	conserved protein, unknown function
PF3D7_1353300	N/A	conserved Plasmodium protein, unknown function
PF3D7_1441300	N/A	serine/threonine protein kinase, putative
PF3D7_1334100	N/A	conserved protein, unknown function
PF3D7_1212900	BDP2	bromodomain protein 2, putative
PF3D7_1228800	N/A	WD repeat-containing protein, putative
PF3D7_1340600	DBR1	RNA lariat debranching enzyme, putative
PF3D7_1208900	PPM11	protein phosphatase PPM11, putative
PF3D7_1426100	BTF3	transcription factor BTF3, putative
PF3D7_1426700	PEPC	phosphoenolpyruvate carboxylase
PF3D7_1465100	COG6	conserved oligomeric Golgi complex subunit 6, putative
PF3D7_0307700	N/A	conserved Plasmodium protein, unknown function
PF3D7_1364000	N/A	conserved protein, unknown function
PF3D7_0623100	NAB2	nuclear polyadenylated RNA-binding protein NAB2, putative
PF3D7_1359900	N/A	conserved Plasmodium membrane protein, unknown function
PF3D7_0513600	N/A	deoxyribodipyrimidine photo-lyase, putative
PF3D7_0932800	CSE1	importin alpha re-exporter, putative
PF3D7_1351700	IMC1f	inner membrane complex protein 1f, putative
PF3D7_1308200	cpsSII	carbamoyl phosphate synthetase
PF3D7_0103400	N/A	zinc-carboxypeptidase, putative
PF3D7_1352700	AQR	intron-binding protein aquarius, putative
PF3D7_0823800	N/A	DnaJ protein, putative
PF3D7_1408200	AP2-G2	AP2 domain transcription factor AP2-G2
PF3D7_1461100	N/A	conserved Plasmodium protein, unknown function
PF3D7_1455300	N/A	conserved protein, unknown function
PF3D7_0905400	RhopH3	high molecular weight rhoptry protein 3
PF3D7_1425800	N/A	conserved Plasmodium protein, unknown function
PF3D7_0824900	N/A	conserved Plasmodium protein, unknown function
PF3D7_1136600	N/A	conserved Plasmodium protein, unknown function
PF3D7_1008500	N/A	protein GPR89, putative
PF3D7_1358800	RPS15	40S ribosomal protein S15
PF3D7_1457900	N/A	conserved Plasmodium protein, unknown function
PF3D7_1360800	FLN	falcilysin
PF3D7_1149100	N/A	Plasmodium exported protein, unknown function
PF3D7_1016000	N/A	conserved Plasmodium protein, unknown function
PF3D7_1140400	N/A	conserved Plasmodium protein, unknown function
PF3D7_1017600	N/A	conserved Plasmodium protein, unknown function
PF3D7_1027300	nPrx	peroxiredoxin
PF3D7_1323700	GAPM1	glideosome associated protein with multiple membrane spans 1
PF3D7_0105200	N/A	heptatricopeptide repeat and RAP domain-containing protein, putative
PF3D7_1416200	MCA3	metacaspase-3
PF3D7_1247500	N/A	serine/threonine protein kinase, putative
PF3D7_1030000	SPT4	transcription elongation factor SPT4, putative
PF3D7_0824400	NT2	nucleoside transporter 2
PF3D7_1002100	PTP5	EMP1-trafficking protein
PF3D7_1138800	N/A	WD repeat-containing protein, putative
PF3D7_0106300	ATP6	calcium-transporting ATPase
PF3D7_1211300	MCM8	DNA helicase MCM8, putative
PF3D7_1339700	N/A	conserved Plasmodium protein, unknown function
PF3D7_0214100	SEC31	protein transport protein SEC31
PF3D7_1473700	NUP116	nucleoporin NUP116/NSP116, putative
PF3D7_0710200	N/A	conserved Plasmodium protein, unknown function
PF3D7_0922800	N/A	conserved Plasmodium protein, unknown function
PF3D7_1013200	N/A	conserved Plasmodium protein, unknown function
PF3D7_0504800	N/A	conserved Plasmodium protein, unknown function
PF3D7_0317300	N/A	conserved Plasmodium protein, unknown function
PF3D7_1138400	GCalpha	guanylyl cyclase alpha
PF3D7_1472200	HDA1	histone deacetylase, putative
PF3D7_1237500	N/A	conserved Plasmodium protein, unknown function
PF3D7_1421200	RPS25	40S ribosomal protein S25
PF3D7_1357100	N/A	elongation factor 1-alpha
PF3D7_0317700	N/A	CPSF (cleavage and polyadenylation specific factor), subunit A, putative
PF3D7_0510100	N/A	KH domain-containing protein, putative
PF3D7_1459000	DBP5	ATP-dependent RNA helicase DBP5
PF3D7_0829000	N/A	conserved Plasmodium membrane protein, unknown function
PF3D7_0918900	gammaGCS	gamma-glutamylcysteine synthetase
PF3D7_1121100	N/A	conserved protein, unknown function
PF3D7_1352800	MON1	vacuolar fusion protein MON1, putative
PF3D7_0822900	PIC2	PhIL1-interacting candidate PIC2
PF3D7_1350100	KRS1	lysine--tRNA ligase
PF3D7_0935200	VPS33	vacuolar protein sorting-associated protein 33, putative
PF3D7_1239800	N/A	conserved Plasmodium protein, unknown function
PF3D7_1205800	HMGB3	high mobility group protein B3, putative
PF3D7_0316500	NUF2	kinetochore protein NUF2, putative
PF3D7_1204300	EIF5A	eukaryotic translation initiation factor 5A
PF3D7_0717700	N/A	serine--tRNA ligase, putative
PF3D7_0532400	LyMP	lysine-rich membrane-associated PHISTb protein
PF3D7_1223700	VIT	vacuolar iron transporter
PF3D7_1227300	N/A	conserved Plasmodium protein, unknown function
PF3D7_1304200	MIT2	CorA-like Mg2+ transporter protein, putative
PF3D7_0403600	N/A	conserved Plasmodium protein, unknown function
PF3D7_1423300	PP7	serine/threonine protein phosphatase 7
PF3D7_0311300	N/A	phosphatidylinositol 3- and 4-kinase, putative
PF3D7_1241500	N/A	conserved Plasmodium protein, unknown function
PF3D7_1239000	N/A	HD superfamily phosphohydrolase protein, putative
PF3D7_1142100	N/A	conserved Plasmodium protein, unknown function
PF3D7_1011400	N/A	proteasome subunit beta type-5
PF3D7_0509800	PI4KB	phosphatidylinositol 4-kinase beta
PF3D7_0606500	PTB	polypyrimidine tract-binding protein, putative
PF3D7_0309000	YVH1	dual specificity protein phosphatase
PF3D7_0730500	N/A	conserved Plasmodium protein, unknown function
PF3D7_1451200	N/A	conserved Plasmodium protein, unknown function
PF3D7_1014600	ADA2	transcriptional coactivator ADA2
PF3D7_0802600	ACbeta	adenylyl cyclase beta
PF3D7_1442900	ARFGEF	Sec7 domain-containing protein ARFGEF, putative
PF3D7_1237900	N/A	conserved Plasmodium protein, unknown function
PF3D7_1027700	CEN3	centrin-3
PF3D7_1437200	N/A	ribonucleoside-diphosphate reductase large subunit, putative
PF3D7_1003000	N/A	guanylate cyclase organizer UGO, putative
PF3D7_1420100	N/A	conserved Plasmodium protein, unknown function
PF3D7_0212400	N/A	conserved Plasmodium membrane protein, unknown function
PF3D7_1250200	N/A	CSC1-like protein, putative
PF3D7_0522400	N/A	conserved Plasmodium protein, unknown function
PF3D7_0705300	ORC2	origin recognition complex subunit 2
PF3D7_0807600	N/A	conserved Plasmodium protein, unknown function
PF3D7_1437400	PANK2	pantothenate kinase 2
PF3D7_0924400	N/A	conserved Plasmodium protein, unknown function
PF3D7_0203600	N/A	conserved Plasmodium protein, unknown function
PF3D7_1030200	CLAMP	claudin-like apicomplexan microneme protein, putative
PF3D7_0110700	CAF1C	chromatin assembly factor 1 subunit C, putative
PF3D7_1019500	N/A	TMEM94 domain-containing protein, putative
PF3D7_1460500	N/A	conserved Plasmodium protein, unknown function
PF3D7_1464500	N/A	conserved Plasmodium membrane protein, unknown function
PF3D7_0623800	TKL4	tyrosine kinase-like protein, putative
PF3D7_0808300	N/A	ubiquitin regulatory protein, putative
PF3D7_0704800	PPM12	protein phosphatase PPM12, putative
PF3D7_1244600	ARFGAP1	ADP-ribosylation factor GTPase-activating protein 1
PF3D7_0723800	N/A	conserved Plasmodium protein, unknown function
PF3D7_0910200	N/A	conserved Plasmodium protein, unknown function
PF3D7_0208100	N/A	conserved Plasmodium protein, unknown function
PF3D7_1220300	N/A	cell cycle associated protein, putative
PF3D7_1225700	N/A	VAC14 domain-containing protein, putative
PF3D7_0905900	SEC27	coatomer subunit beta, putative
PF3D7_1311800	M1AAP	M1-family alanyl aminopeptidase
PF3D7_1032700	N/A	conserved Plasmodium protein, unknown function
PF3D7_0508900	AAP6	protein AAP6
PF3D7_1037500	DYN2	dynamin-like protein
PF3D7_0209800	UAP56	ATP-dependent RNA helicase UAP56
PF3D7_0417400	N/A	conserved Plasmodium protein, unknown function
PF3D7_0521000	N/A	conserved Plasmodium protein, unknown function
PF3D7_0614300	MFR1	major facilitator superfamily-related transporter, putative
PF3D7_1437300	N/A	conserved Plasmodium protein, unknown function
PF3D7_0611600	BTP1	basal complex transmembrane protein 1
PF3D7_0616200	NDC80	kinetochore protein NDC80, putative
PF3D7_1342900	AP2-HS	AP2 domain transcription factor AP2-HS
PF3D7_0302900	N/A	exportin-1, putative
PF3D7_0503200	CDC6	cell division control protein 6, putative
PF3D7_1465200	MED4	mediator of RNA polymerase II transcription subunit 4, putative
PF3D7_0307200	N/A	60S ribosomal protein L7, putative
PF3D7_0529400	N/A	conserved Plasmodium protein, unknown function
PF3D7_1236000	N/A	vesicle transport v-SNARE protein VTI1, putative
PF3D7_1039000	FIKK10.2	serine/threonine protein kinase, FIKK family
PF3D7_0705400	MCM7	DNA replication licensing factor MCM7
PF3D7_0528400	DHHC7	palmitoyltransferase DHHC7
PF3D7_1218500	DRPC	dynamin-like protein, putative
PF3D7_1021900	N/A	PHAX domain-containing protein, putative
PF3D7_0105700	N/A	asparagine-rich antigen Pfa35-2
PF3D7_1401200	N/A	Plasmodium exported protein, unknown function
PF3D7_1141300	APR1	apical polar ring protein APR1, putative
PF3D7_0628300	CEPT	choline/ethanolaminephosphotransferase, putative
PF3D7_0420300	ApiAP2	AP2 domain transcription factor, putative
PF3D7_1207000	N/A	conserved Plasmodium protein, unknown function
PF3D7_1346400	N/A	VPS13 domain-containing protein, putative
PF3D7_0603400	TEX1	trophozoite exported protein 1
PF3D7_0906600	N/A	zinc finger protein, putative
PF3D7_1453700	P23	HSP90 co-chaperone p23
PF3D7_1415400	N/A	Btz domain-containing protein, putative
PF3D7_0921900	N/A	conserved Plasmodium protein, unknown function
PF3D7_0418600	N/A	regulator of chromosome condensation, putative
PF3D7_0629700	SET1	SET domain protein, putative
PF3D7_1014900	KIC8	protein KIC8
PF3D7_1340900	PiT	sodium-dependent phosphate transporter
PF3D7_0319100	RBX1	E3 ubiquitin-protein ligase RBX1, putative
PF3D7_0501400	FIRA	interspersed repeat antigen
PF3D7_1015900	ENO	enolase
PF3D7_1202600	NEMF	nuclear export mediator factor NEMF, putative
PF3D7_1422300	N/A	DnaJ protein, putative
PF3D7_1318700	AAP4	protein AAP4
PF3D7_0907300	N/A	prefoldin-like protein, putative
PF3D7_0507800	N/A	conserved protein, unknown function
PF3D7_1234100	BDP5	bromodomain protein 5
PF3D7_1466100	PPKL	protein phosphatase containing kelch-like domains
PF3D7_1344100	N/A	TLD domain-containing protein, putative
PF3D7_1358900	N/A	GTP-binding protein, putative
PF3D7_0202100	LSAP2	liver stage associated protein 2
PF3D7_1025900	N/A	conserved protein, unknown function
PF3D7_0515400	N/A	conserved protein, unknown function
PF3D7_1453200	N/A	conserved Plasmodium protein, unknown function
PF3D7_1023000	N/A	conserved Plasmodium protein, unknown function
PF3D7_0820900	N/A	conserved Plasmodium protein, unknown function
PF3D7_0209100	PATPL1	patatin-like phospholipase 1
PF3D7_0731600	ACS5	acyl-CoA synthetase
PF3D7_0604500	N/A	GYF domain-containing protein, putative
PF3D7_1007000	TMEM147	transmembrane protein 147, putative
PF3D7_1474900	CITH	trailer hitch homolog, putative
PF3D7_1437500	N/A	conserved Plasmodium membrane protein, unknown function
PF3D7_1308000	N/A	conserved Plasmodium membrane protein, unknown function
PF3D7_1221000	SET10	histone-lysine N-methyltransferase, H3 lysine-4 specific
PF3D7_0505100	TRS85	trafficking protein particle complex subunit 8, putative
PF3D7_1440000	N/A	conserved Plasmodium protein, unknown function
PF3D7_1302000	PTP6	EMP1-trafficking protein
PF3D7_0923400	N/A	conserved Plasmodium protein, unknown function
PF3D7_0218500	SNRPD2	small nuclear ribonucleoprotein Sm D2, putative
PF3D7_1119300	U2AF1	splicing factor U2AF small subunit, putative
PF3D7_1448300	N/A	conserved protein, unknown function
PF3D7_1206700	EIF5	eukaryotic translation initiation factor 5, putative
PF3D7_1307700	N/A	TOM1-like protein, putative
PF3D7_0702500	N/A	Plasmodium exported protein, unknown function
PF3D7_0629600	N/A	ribosomal RNA-processing protein 7, putative
PF3D7_0933200	N/A	calcyclin-binding protein, putative
PF3D7_0215400	N/A	conserved Plasmodium protein, unknown function
PF3D7_0523000	MDR1	multidrug resistance protein 1
PF3D7_1303500	NHE	sodium/hydrogen exchanger
PF3D7_1312800	AAP2	protein AAP2
PF3D7_1018200	PPP8	serine/threonine protein phosphatase 8, putative
PF3D7_1129300	N/A	conserved Plasmodium protein, unknown function
PF3D7_0409600	RPA1	replication protein A1, large subunit
PF3D7_0920000	ELO3	elongation of fatty acids protein, putative
PF3D7_1019000	N/A	eukaryotic translation initiation factor subunit eIF2A, putative
PF3D7_0401800	PfD80	Plasmodium exported protein (PHISTb), unknown function
PF3D7_0728600	N/A	RING zinc finger protein, putative
PF3D7_1011800	PREBP	PRE-binding protein
PF3D7_0207100	N/A	conserved Plasmodium protein, unknown function
PF3D7_0610200	RBM25	RNA-binding protein 25, putative
PF3D7_1467600	N/A	conserved Plasmodium protein, unknown function
PF3D7_1345600	N/A	inner membrane complex protein
PF3D7_0204300	N/A	conserved Plasmodium protein, unknown function
PF3D7_0704400	N/A	phosphoinositide-binding protein, putative
PF3D7_1004300	N/A	E3 ubiquitin-protein ligase, putative
PF3D7_1023900	CHD1	chromodomain-helicase-DNA-binding protein 1 homolog, putative
PF3D7_0903200	RAB7	ras-related protein RAB7
PF3D7_0731300	PfG174	Plasmodium exported protein (PHISTb), unknown function
PF3D7_0924000	N/A	patatin-like phospholipase, putative
PF3D7_0820000	SRCAP	Snf2-related CBP activator, putative
PF3D7_0403800	N/A	alpha/beta hydrolase, putative
PF3D7_1451800	SORTLR	sortilin
PF3D7_1362700	N/A	conserved Plasmodium protein, unknown function
PF3D7_1104100	SYN13	syntaxin, Qa-SNARE family
PF3D7_1107800	ApiAP2	AP2 domain transcription factor, putative
PF3D7_1305000	N/A	MCL1 domain-containing protein, putative
PF3D7_1239200	ApiAP2	AP2 domain transcription factor, putative
PF3D7_1122500	KIC10	protein KIC10
PF3D7_0210600	CERLI1	protein CERLI1
PF3D7_0715200	N/A	conserved Plasmodium protein, unknown function
PF3D7_0919900	RCC-PIP	regulator of chromosome condensation-PP1-interacting protein
PF3D7_0612200	LRR6	leucine-rich repeat protein
PF3D7_1446500	NUP313	nucleoporin NUP313, putative
PF3D7_0924600	N/A	conserved Plasmodium protein, unknown function
PF3D7_0532300	N/A	Plasmodium exported protein (PHISTb), unknown function
PF3D7_0927600	N/A	RNA-binding protein, putative
PF3D7_1359600	N/A	conserved Plasmodium protein, unknown function
PF3D7_1301700	CBP2	CX3CL1-binding protein 2
PF3D7_1242600	N/A	protein farnesyltransferase subunit alpha
PF3D7_1027800	RPL3	60S ribosomal protein L3
PF3D7_0415300	CRK3	cdc2-related protein kinase 3
PF3D7_0804900	N/A	GTPase-activating protein, putative
PF3D7_0914400	KIC3	protein KIC3
PF3D7_0505500	MSH6	DNA mismatch repair protein MSH6, putative
PF3D7_1139300	AP2-G5	AP2 domain transcription factor AP2-G5
PF3D7_1127800	N/A	TFIIS central domain-containing protein, putative
PF3D7_1353800	N/A	proteasome subunit alpha type-4, putative
PF3D7_0611400	SWIB	SWI/SNF-related matrix-associated actin-dependent regulator of chromatin
PF3D7_0728800	N/A	conserved Plasmodium protein, unknown function
PF3D7_1419600	N/A	conserved Plasmodium protein, unknown function
PF3D7_1311900	vapA	V-type proton ATPase catalytic subunit A
PF3D7_0617200	N/A	BFR1 domain-containing protein, putative
PF3D7_1305300	GCN1	translational activator GCN1, putative
PF3D7_1365800	N/A	conserved Plasmodium protein, unknown function
PF3D7_0704100	BTP2	basal complex transmembrane protein 2
PF3D7_1456500	N/A	STAG domain-containing protein, putative
PF3D7_1248700	N/A	conserved protein, unknown function
PF3D7_0912500	N/A	SAP domain-containing protein, putative
PF3D7_0626800	PyrK	pyruvate kinase
PF3D7_0217600	N/A	conserved Plasmodium protein, unknown function
PF3D7_0630300	N/A	DNA polymerase epsilon catalytic subunit A, putative
PF3D7_1241200	N/A	conserved Plasmodium protein, unknown function
PF3D7_1026000	N/A	conserved Plasmodium protein, unknown function
PF3D7_0511500	N/A	RNA pseudouridylate synthase, putative
PF3D7_0812500	N/A	RNA-binding protein, putative
PF3D7_0818000	SNRNP27	U4/U6.U5 small nuclear ribonucleoprotein, putative
PF3D7_1445400	CLK1	protein serine/threonine kinase-1
PF3D7_1326700	N/A	conserved Apicomplexan protein, unknown function
PF3D7_1201000	N/A	Plasmodium exported protein (PHISTb), unknown function
PF3D7_0911400	N/A	conserved Plasmodium protein, unknown function
PF3D7_0804000	N/A	cactin homolog, putative
PF3D7_0420000	N/A	zinc finger protein, putative
PF3D7_0716000	N/A	RNA-binding protein, putative
PF3D7_1344900	N/A	conserved Plasmodium protein, unknown function
PF3D7_1307900	N/A	tripartite motif protein, putative
PF3D7_1233600	AARP1	asparagine and aspartate rich protein 1
PF3D7_1346500	N/A	conserved Plasmodium protein, unknown function
PF3D7_0525500	N/A	WD repeat-containing protein, putative
PF3D7_1224000	GCH1	GTP cyclohydrolase 1
PF3D7_1433500	TOP2	DNA topoisomerase 2
PF3D7_0517700	EIF3B	eukaryotic translation initiation factor 3 subunit B, putative
PF3D7_1031400	OTU	OTU-like cysteine protease
PF3D7_0615400	N/A	ribonuclease, putative
PF3D7_1345400	N/A	conserved Plasmodium protein, unknown function
PF3D7_0605100	KH1	KH domain-containing protein, putative
PF3D7_1421000	DIX	DIX domain-containing protein, putative
PF3D7_1476300	N/A	Plasmodium exported protein (PHISTb), unknown function
PF3D7_0730300	ApiAP2	AP2 domain transcription factor AP2-L, putative
PF3D7_1004400	N/A	RNA-binding protein, putative
PF3D7_1015100	N/A	CWC16 domain-containing protein, putative
PF3D7_0806800	N/A	V-type proton ATPase subunit a, putative
PF3D7_0305200	N/A	GRIP domain-containing protein, putative
PF3D7_1437000	N/A	N-acetyltransferase, GNAT family, putative
PF3D7_0311100	N/A	pre-mRNA splicing factor, putative
PF3D7_0318200	RPB1	DNA-directed RNA polymerase II subunit RPB1
PF3D7_0926100	N/A	protein kinase, putative
PF3D7_1408700	N/A	conserved protein, unknown function
PF3D7_1343000	PMT	phosphoethanolamine N-methyltransferase
PF3D7_1464000	N/A	YL1 nuclear protein, putative
PF3D7_0321800	N/A	WD repeat-containing protein, putative
PF3D7_1360900	N/A	RNA-binding protein, putative
PF3D7_1435600	N/A	conserved Plasmodium protein, unknown function
PF3D7_1209300	TRZ	telomere repeat-binding zinc finger protein
PF3D7_1458000	FP1	cysteine proteinase falcipain 1
PF3D7_1238600	NSM	sphingomyelin phosphodiesterase
PF3D7_1450100	SRP54	signal recognition particle subunit SRP54
PF3D7_0708400	HSP90	heat shock protein 90
PF3D7_1329100	MyoF	myosin F, putative
PF3D7_1134300	EMMA1	erythrocyte membrane and merozoite antigen EMMA1
PF3D7_1115800	N/A	conserved Plasmodium protein, unknown function
PF3D7_0602600	N/A	SAC3 domain-containing protein, putative
PF3D7_0930500	DGK1	diacylglycerol kinase, putative
PF3D7_0729300	NMD3	60S ribosomal export protein NMD3, putative
PF3D7_1447800	N/A	calponin homology domain-containing protein, putative
PF3D7_0812100	N/A	proteasome activator complex subunit 4, putative
PF3D7_1205100	SEPSECS	O-phosphoseryl-tRNA(Sec) selenium transferase, putative
PF3D7_0212500	N/A	conserved Plasmodium protein, unknown function
PF3D7_1021700	N/A	VPS13 domain-containing protein, putative
PF3D7_0928300	N/A	conserved Plasmodium protein, unknown function
PF3D7_1312100	N/A	GYF domain-containing protein, putative
PF3D7_0911100	N/A	START domain-containing protein, putative
PF3D7_1423700	N/A	conserved Plasmodium protein, unknown function
PF3D7_0813400	N/A	conserved protein, unknown function
PF3D7_1008000	HDA2	histone deacetylase 2
PF3D7_1320700	N/A	conserved protein, unknown function
PF3D7_0617800	H2A	histone H2A
PF3D7_1227600	SPC24	kinetochore protein SPC24, putative
PF3D7_1418900	DBP4	ATP-dependent RNA helicase DBP4, putative
PF3D7_1304100	LigI	DNA ligase I
PF3D7_0905100	NUP221	nucleoporin NUP221, putative
PF3D7_1343700	Kelch13	kelch protein K13
PF3D7_0907200	N/A	GTPase-activating protein, putative
PF3D7_1458500	SAS4	spindle assembly abnormal protein 4, putative
PF3D7_0610400	H3	histone H3
PF3D7_0416200	N/A	PRKR-interacting protein 1, putative
PF3D7_1203400	MFS4	major facilitator superfamily domain-containing protein, putative
PF3D7_1462800	GAPDH	glyceraldehyde-3-phosphate dehydrogenase
PF3D7_0624600	ISWI	ISWI chromatin-remodeling complex ATPase
PF3D7_1440100	N/A	cohesin complex subunit, putative
PF3D7_1417200	NOT1	CCR4-NOT transcription complex subunit NOT1, putative
PF3D7_1014300	N/A	SPRY domain-containing protein, putative
PF3D7_1403100	CAPD2	condensin complex subunit 1, putative
PF3D7_1138700	KIC5	protein KIC5
PF3D7_1405800	BOP1	ribosome biogenesis protein BOP1, putative
PF3D7_0402400	GEXP18	Plasmodium exported protein, unknown function
PF3D7_0906100	VPS46	vacuolar protein sorting-associated protein 46, putative
PF3D7_1446400	pdhB	pyruvate dehydrogenase E1 component subunit beta
PF3D7_1124100	BDCP	BEACH domain-containing protein, putative
PF3D7_0317200	CRK4	cdc2-related protein kinase 4
PF3D7_1115200	SET7	histone-lysine N-methyltransferase SET7
PF3D7_1140200	N/A	conserved Plasmodium protein, unknown function
PF3D7_1208400	N/A	amino acid transporter, putative
PF3D7_0705100	N/A	conserved Plasmodium protein, unknown function
PF3D7_0507100	RPL4	60S ribosomal protein L4
PF3D7_1303200	VAMP8	SNARE protein, putative
PF3D7_0526200	ARFGAP2	ADP-ribosylation factor GTPase-activating protein 2
PF3D7_1207100	N/A	pre-rRNA-processing protein ESF1, putative
PF3D7_0920700	N/A	CRAL/TRIO domain-containing protein, putative
PF3D7_1008800	NOP5	nucleolar protein 5, putative
PF3D7_1335100	MSP7	merozoite surface protein 7
PF3D7_1321700	SF1	splicing factor 1
PF3D7_1134800	N/A	coatomer subunit delta
PF3D7_0108300	ARP	conserved Plasmodium protein, unknown function
PF3D7_0618900	GPI1	phosphatidylinositol N-acetylglucosaminyltransferase subunit GPI1
PF3D7_0727400	N/A	proteasome subunit alpha type-5, putative
PF3D7_0719900	N/A	conserved Plasmodium membrane protein, unknown function
PF3D7_0811300	CAF1	CCR4-associated factor 1
PF3D7_1126800	SR-MG	alternative splicing factor SR-MG, putative
PF3D7_0930300	MSP1	merozoite surface protein 1
PF3D7_0627100	N/A	ankyrin-repeat protein, putative
PF3D7_1367100	SNP1	U1 small nuclear ribonucleoprotein 70 kDa homolog, putative
PF3D7_1307200	N/A	DnaJ protein, putative
PF3D7_1328000	N/A	conserved Plasmodium protein, unknown function
PF3D7_0723400	N/A	conserved Plasmodium protein, unknown function
PF3D7_1439800	N/A	vesicle-associated membrane protein, putative
PF3D7_0630600	N/A	deubiquitinating enzyme MINDY, putative
PF3D7_1212700	EIF3A	eukaryotic translation initiation factor 3 subunit A, putative
PF3D7_1316100	IPK2	inositol polyphosphate kinase, putative
PF3D7_0914900	N/A	BSD-domain protein, putative
PF3D7_1248900	RPT6	26S protease regulatory subunit 8, putative
PF3D7_1407100	NOP1	rRNA 2'-O-methyltransferase fibrillarin, putative
PF3D7_0823100	N/A	RWD domain-containing protein, putative
PF3D7_1148000	N/A	serine/threonine protein kinase, putative
PF3D7_1116500	FT2	folate transporter 2
PF3D7_0709400	N/A	Cg7 protein
PF3D7_1321300	N/A	conserved Plasmodium membrane protein, unknown function
PF3D7_1356100	N/A	conserved Plasmodium protein, unknown function
PF3D7_0322900	RPS3A	40S ribosomal protein S3A, putative
PF3D7_1405100	N/A	GTPase-activating protein, putative
PF3D7_0619000	N/A	FPL domain-containing protein, putative
PF3D7_0821400	N/A	conserved Plasmodium protein, unknown function
PF3D7_1413700	N/A	DET1 domain-containing protein, putative
PF3D7_1410300	N/A	WD repeat-containing protein, putative
PF3D7_0913200	EF-1beta	elongation factor 1-beta
PF3D7_1357000	N/A	elongation factor 1-alpha
PF3D7_1130700	SMC1	structural maintenance of chromosomes protein 1, putative
PF3D7_0912800	GCD10	tRNA (adenine(58)-N(1))-methyltransferase non-catalytic subunit TRM6, putative
PF3D7_1206200	EIF3C	eukaryotic translation initiation factor 3 subunit C, putative
PF3D7_1033700	BDP1	bromodomain protein 1
PF3D7_0707700	N/A	E3 ubiquitin-protein ligase, putative
PF3D7_1317800	RPS19	40S ribosomal protein S19
PF3D7_0507600	CAF40	protein CAF40, putative
PF3D7_0419800	N/A	60S ribosomal protein L7ae/L30e, putative
PF3D7_1221300	N/A	conserved Plasmodium protein, unknown function
PF3D7_1369500	N/A	conserved protein, unknown function
PF3D7_1102500	GEXP02	gametocyte exported protein 2
PF3D7_1408400	FANCJ	FANCJ-like helicase, putative
PF3D7_1441600	N/A	acid cluster protein 33 homologue, putative
PF3D7_1402300	RPN6	26S proteasome regulatory subunit RPN6
PF3D7_1201900	N/A	conserved protein, unknown function
PF3D7_0220600	N/A	Plasmodium exported protein (hyp9), unknown function
PF3D7_0813300	N/A	NPL domain-containing protein, putative
PF3D7_1025500	N/A	conserved Plasmodium protein, unknown function
PF3D7_1105300	N/A	conserved Plasmodium protein, unknown function
PF3D7_1219100	CHC	clathrin heavy chain, putative
PF3D7_1325400	N/A	CRWN-like protein, putative
PF3D7_1323200	N/A	V-type proton ATPase subunit G, putative
PF3D7_1412600	DHS	deoxyhypusine synthase
PF3D7_1346100	SEC61A	protein transport protein SEC61 subunit alpha
PF3D7_1325900	N/A	conserved Plasmodium protein, unknown function
PF3D7_1409400	N/A	conserved protein, unknown function
PF3D7_0408500	FEN1	flap endonuclease 1
PF3D7_1366700	N/A	conserved Plasmodium protein, unknown function
PF3D7_0716800	EIF3I	eukaryotic translation initiation factor 3 subunit I, putative
PF3D7_0912900	RPN8	26S proteasome regulatory subunit RPN8, putative
PF3D7_1228400	N/A	conserved Plasmodium protein, unknown function
PF3D7_0208400	N/A	conserved Plasmodium protein, unknown function
PF3D7_0515700	GAP40	glideosome-associated protein 40, putative
PF3D7_0707300	RAMA	rhoptry-associated membrane antigen
PF3D7_1433100	N/A	HID1 domain-containing protein, putative
PF3D7_0810300	PPM5	protein phosphatase PPM5, putative
PF3D7_1314100	N/A	conserved Plasmodium protein, unknown function
PF3D7_0804500	N/A	conserved Plasmodium membrane protein, unknown function
PF3D7_1002400	TRA2B	transformer-2 protein homolog beta, putative
PF3D7_0402000	N/A	Plasmodium exported protein (PHISTa), unknown function
PF3D7_1029600	ADA	adenosine deaminase
PF3D7_1220900	HP1	heterochromatin protein 1
PF3D7_1328200	N/A	conserved Plasmodium protein, unknown function
PF3D7_0621900	SRP68	signal recognition particle subunit SRP68, putative
PF3D7_0722200	RALP1	rhoptry-associated leucine zipper-like protein 1
PF3D7_1361100	SEC24A	protein transport protein Sec24A
PF3D7_1339300	N/A	conserved protein, unknown function
PF3D7_1311500	RPT1	26S protease regulatory subunit 7, putative
PF3D7_1436300	PTEX150	translocon component PTEX150
PF3D7_1419000	N/A	conserved Plasmodium protein, unknown function
PF3D7_0607000	N/A	translation initiation factor IF-2, putative
PF3D7_1103800	NOT1-G	CCR4-NOT transcription complex subunit NOT1-G, putative
PF3D7_1219000	FRM2	formin 2
PF3D7_0304100	IMC1e	inner membrane complex protein 1e, putative
PF3D7_0531100	N/A	conserved Plasmodium protein, unknown function
PF3D7_1474000	N/A	conserved Plasmodium protein, unknown function
PF3D7_0730900	PTP4	EMP1-trafficking protein
PF3D7_1447900	MDR2	multidrug resistance protein 2
PF3D7_1004200	N/A	WD repeat-containing protein, putative
PF3D7_0624000	HK	hexokinase
PF3D7_0320000	I2	protein phosphatase inhibitor 2
PF3D7_0907700	PA28	proteasome activator 28
PF3D7_1449100	N/A	CLASP domain-containing protein, putative
PF3D7_1238100	N/A	calcyclin binding protein, putative
PF3D7_0307500	SKA2	spindle and kinetochore-associated protein 2, putative
PF3D7_0503300	SRSF12	serine/arginine-rich splicing factor 12
PF3D7_1012500	N/A	phosphoglucomutase, putative
PF3D7_1303800	N/A	conserved Plasmodium protein, unknown function
PF3D7_0703200	N/A	conserved Plasmodium protein, unknown function
PF3D7_0702300	STARP	sporozoite threonine and asparagine-rich protein
PF3D7_0824800	N/A	conserved Plasmodium membrane protein, unknown function
PF3D7_0627800	ACAS	acetyl-CoA synthetase
PF3D7_1311400	AP1M1	AP-1 complex subunit mu-1
PF3D7_1442700	N/A	conserved Plasmodium protein, unknown function
PF3D7_1109900	RPL36	60S ribosomal protein L36
PF3D7_0527000	MCM3	DNA replication licensing factor MCM3, putative
PF3D7_1328500	N/A	alpha/beta-hydrolase, putative
PF3D7_0515300	PI3K	phosphatidylinositol 3-kinase
PF3D7_0202500	ETRAMP2	early transcribed membrane protein 2
PF3D7_0415400	N/A	coatomer subunit zeta, putative
PF3D7_1025000	EPS15	Eps15-like protein
PF3D7_0604100	SIP2	AP2 domain transcription factor
PF3D7_0708800	HSP110c	heat shock protein 110
PF3D7_0602900	N/A	conserved Plasmodium protein, unknown function
PF3D7_1138500	PPM2	protein phosphatase PPM2
PF3D7_1021100	N/A	conserved Plasmodium protein, unknown function
PF3D7_0826300	N/A	SPRY domain, putative
PF3D7_1448500	N/A	conserved Plasmodium protein, unknown function
PF3D7_1223400	N/A	phospholipid-transporting ATPase, putative
PF3D7_1303400	LisH	LisH domain-containing protein, putative
PF3D7_1313800	N/A	conserved Plasmodium membrane protein, unknown function
PF3D7_0628200	PK4	eukaryotic translation initiation factor 2-alpha kinase
PF3D7_1461600	SF3B2	splicing factor 3B subunit 2, putative
PF3D7_0417800	CRK1	cdc2-related protein kinase 1
PF3D7_1146200	N/A	conserved Plasmodium protein, unknown function
PF3D7_0715800	DMT1	drug/metabolite transporter DMT1, putative
PF3D7_1440800	MFS6	major facilitator superfamily domain-containing protein, putative
PF3D7_1438400	MCA2	metacaspase-2
PF3D7_1145200	N/A	serine/threonine protein kinase, putative
PF3D7_1124600	EK	ethanolamine kinase
PF3D7_1108600	ERC	endoplasmic reticulum-resident calcium binding protein
PF3D7_0707600	MED10	mediator of RNA polymerase II transcription subunit 10, putative
PF3D7_0805700	FIKK8	serine/threonine protein kinase, FIKK family
PF3D7_0726500	N/A	ubiquitin carboxyl-terminal hydrolase, putative
PF3D7_1425400	N/A	DEAD/DEAH box helicase, putative
PF3D7_1203700	NAPL	nucleosome assembly protein
PF3D7_1245100	KLP8	kinesin-13, putative
PF3D7_0932000	N/A	conserved Plasmodium protein, unknown function
PF3D7_1230800	WTAP	pre-mRNA-splicing regulator WTAP, putative
PF3D7_0622800	N/A	leucine--tRNA ligase, putative
PF3D7_1462900	N/A	AAA ATPase, putative
PF3D7_0902000	FIKK9.1	serine/threonine protein kinase, FIKK family
PF3D7_1315900	N/A	exportin-T, putative
PF3D7_1224300	PABP1	polyadenylate-binding protein 1, putative
PF3D7_0601600	N/A	tetratricopeptide repeat protein, putative
PF3D7_1120000	N/A	conserved protein, unknown function
PF3D7_1123100	CDPK7	calcium-dependent protein kinase 7
PF3D7_0202000	KAHRP	knob-associated histidine-rich protein
PF3D7_0217500	CDPK1	calcium-dependent protein kinase 1
PF3D7_0801000	N/A	Plasmodium exported protein (PHISTc)
PF3D7_1435300	N/A	glutamate synthase [NADH], putative
PF3D7_0207600	SERA5	serine repeat antigen 5
PF3D7_1364400	N/A	conserved Plasmodium protein, unknown function
PF3D7_1246300	KIC4	protein KIC4
PF3D7_1301600	EBA140	erythrocyte binding antigen-140
PF3D7_1459600	N/A	AP-4 complex accessory subunit Tepsin, putative
PF3D7_1036900	N/A	conserved Plasmodium protein, unknown function
PF3D7_1327300	N/A	conserved Plasmodium protein, unknown function
PF3D7_1142300	N/A	conserved Plasmodium membrane protein, unknown function
PF3D7_1430300	N/A	acid phosphatase, putative
PF3D7_1146600	ORP1	oocyst rupture protein 1, putative
PF3D7_0728000	eIF2alpha	eukaryotic translation initiation factor 2 subunit alpha
PF3D7_1414300	N/A	60S ribosomal protein L10, putative
PF3D7_0814200	ALBA1	DNA/RNA-binding protein Alba 1
PF3D7_0704200	NSUN1	RNA cytosine C(5)-methyltransferase, putative
PF3D7_1332200	N/A	conserved protein, unknown function
PF3D7_1141800	N/A	EELM2 domain-containing protein, putative
PF3D7_0933000	N/A	CSTF domain-containing protein, putative
PF3D7_0312400	GSK3	glycogen synthase kinase 3
PF3D7_1020700	N/A	N-acetyltransferase, GNAT family, putative
PF3D7_1001600	XL2	exported lipase 2
PF3D7_0616900	N/A	conserved Plasmodium protein, unknown function
PF3D7_0621100	N/A	conserved Plasmodium protein, unknown function
PF3D7_0731100	PTP2	EMP1-trafficking protein
PF3D7_1317100	MCM4	DNA replication licensing factor MCM4
PF3D7_0506800	TCF25	transcription factor 25, putative
PF3D7_0923900	PABP2	polyadenylate-binding protein 2, putative
PF3D7_1012000	N/A	RING zinc finger protein, putative
PF3D7_1415000	UDG	uracil-DNA glycosylase
PF3D7_1231800	N/A	asparagine-rich protein, putative
PF3D7_0110600	PIP5K	phosphatidylinositol-4-phosphate 5-kinase
PF3D7_0610900	SPT5	transcription elongation factor SPT5, putative
PF3D7_0303500	N/A	spindle pole body protein, putative
PF3D7_0505700	N/A	conserved Plasmodium membrane protein, unknown function
PF3D7_0711400	SAP18	histone deacetylase complex subunit SAP18, putative
PF3D7_1304400	N/A	PUB domain-containing protein, putative
PF3D7_1206300	N/A	conserved Plasmodium protein, unknown function
PF3D7_0309300	N/A	N2227-like protein, putative
PF3D7_0724700	BDP6	bromodomain protein 6, putative
PF3D7_0907600	N/A	translation initiation factor SUI1, putative
PF3D7_0321100	N/A	conserved Plasmodium protein, unknown function
PF3D7_0409800	N/A	zinc finger protein, putative
PF3D7_0813100	N/A	conserved Plasmodium protein, unknown function
PF3D7_0210900	N/A	conserved Plasmodium protein, unknown function
PF3D7_1455500	N/A	AP-1 complex subunit gamma, putative
PF3D7_0714500	N/A	transcription elongation factor s-II, putative
PF3D7_0602000	N/A	zinc finger protein, putative
PF3D7_1121300	TKL2	tyrosine kinase-like protein
PF3D7_0310900	N/A	conserved Plasmodium protein, unknown function
PF3D7_1017500	ELC	myosin essential light chain ELC
PF3D7_0904600	N/A	ubiquitin specific protease, putative
PF3D7_0203000	ROPE	repetitive organellar protein, putative
PF3D7_0605500	N/A	cyclin dependent kinase binding protein, putative
PF3D7_0104800	NPT1	novel putative transporter 1, putative
PF3D7_1437900	HSP40	HSP40, subfamily A
PF3D7_0615800	COG4	conserved oligomeric Golgi complex subunit 4, putative
PF3D7_1145400	DYN1	dynamin-like protein
PF3D7_1310700	PIC5	PhIL1-interacting candidate PIC5
PF3D7_0521700	DDX1	ATP-dependent RNA helicase DDX1, putative
PF3D7_1452600	N/A	conserved Plasmodium protein, unknown function
PF3D7_0704300	N/A	conserved Plasmodium membrane protein, unknown function
PF3D7_0528100	N/A	AP-1/2 complex subunit beta, putative
PF3D7_0706500	N/A	conserved Plasmodium protein, unknown function
PF3D7_0618600	ROM10	rhomboid protease ROM10
PF3D7_0410800	N/A	conserved Plasmodium protein, unknown function
PF3D7_1343100	N/A	conserved Plasmodium protein, unknown function
PF3D7_1365000	N/A	conserved Plasmodium protein, unknown function
PF3D7_0818900	HSP70	heat shock protein 70
PF3D7_0910300	N/A	conserved protein, unknown function
PF3D7_0904100	N/A	AP-4 complex subunit epsilon, putative
PF3D7_1312900	EIF4G	eukaryotic translation initation factor 4 gamma
PF3D7_1143100	AP2-O	AP2 domain transcription factor AP2-O
PF3D7_0811500	CARM1	histone-arginine methyltransferase CARM1, putative
PF3D7_1428800	N/A	transcription initiation TFIID-like, putative
PF3D7_0609100	ZIP1	zinc transporter ZIP1, putative
PF3D7_0903400	DDX60	ATP-dependent RNA helicase DDX60, putative
PF3D7_0818200	14-3-3I	14-3-3 protein
PF3D7_1435500	CLC	clathrin light chain, putative
PF3D7_1211900	ATP4	non-SERCA-type Ca2+ -transporting P-ATPase
PF3D7_0505000	N/A	MMS19-like protein, putative
PF3D7_0214800	N/A	conserved Plasmodium membrane protein, unknown function
PF3D7_1136700	AIP	armadillo-interacting protein AIP
PF3D7_1105800	N/A	conserved Apicomplexan protein, unknown function
PF3D7_0930600	CYP72	peptidyl-prolyl cis-trans isomerase
PF3D7_0704600	UT	HECT-type E3 ubiquitin ligase UT
PF3D7_1429900	WRN	ADP-dependent DNA helicase RecQ
PF3D7_0826500	UBE4B	ubiquitin conjugation factor E4 B, putative
PF3D7_1005500	UPF1	regulator of nonsense transcripts 1, putative
PF3D7_0214300	N/A	conserved Plasmodium protein, unknown function
PF3D7_1326500	N/A	conserved Plasmodium protein, unknown function
PF3D7_1112100	N/A	conserved Plasmodium protein, unknown function
PF3D7_1020900	ARF1	ADP-ribosylation factor 1
PF3D7_1032100	DCP1	mRNA-decapping enzyme subunit 1, putative
PF3D7_0823300	GCN5	histone acetyltransferase GCN5
PF3D7_1349300	TKL3	tyrosine kinase-like protein
PF3D7_1333600	UTP4	U3 small nucleolar RNA-associated protein 4, putative
PF3D7_1223100	PKAr	cAMP-dependent protein kinase regulatory subunit
PF3D7_0801700	SENP2	sentrin-specific protease 2, putative
PF3D7_0308100	N/A	zinc finger protein, putative
PF3D7_1369700	SNRPA1	U2 small nuclear ribonucleoprotein A', putative
PF3D7_0914700	MFR4	major facilitator superfamily-related transporter, putative
PF3D7_0905800	N/A	conserved Plasmodium protein, unknown function
PF3D7_0629500	AAT1	amino acid transporter AAT1
PF3D7_0411300	N/A	conserved Plasmodium protein, unknown function
PF3D7_1114700	CLK3	cyclin-dependent-like kinase CLK3
PF3D7_1238500	N/A	conserved Plasmodium protein, unknown function
PF3D7_0302100	SRPK1	serine/threonine protein kinase
PF3D7_0218100	N/A	conserved protein, unknown function
PF3D7_1249800	THO2	THO complex subunit 2, putative
PF3D7_1227800	ELP3	elongator complex protein 3, putative
PF3D7_0717200	N/A	conserved Plasmodium protein, unknown function
PF3D7_0813200	N/A	CS domain protein, putative
PF3D7_1013900	N/A	translation initiation factor eIF-2B subunit delta, putative
PF3D7_1104200	SNF2L	chromatin remodeling protein
PF3D7_1034500	N/A	armadillo repeat protein, putative
PF3D7_0703900	N/A	conserved Plasmodium membrane protein, unknown function
PF3D7_1443100	N/A	conserved Plasmodium protein, unknown function
PF3D7_1438000	N/A	eukaryotic translation initiation factor eIF2A, putative
PF3D7_1008700	N/A	tubulin beta chain
PF3D7_1211700	MCM5	DNA replication licensing factor MCM5, putative
PF3D7_0826700	RACK1	receptor for activated c kinase
PF3D7_0625200	N/A	conserved Plasmodium protein, unknown function
PF3D7_0518500	DDX23	ATP-dependent RNA helicase DDX23, putative
PF3D7_1029400	CDC50C	LEM3/CDC50 family protein, putative
PF3D7_1402800	N/A	conserved Plasmodium protein, unknown function
PF3D7_0423700	ETRAMP4	early transcribed membrane protein 4
PF3D7_0617900	H3.3	histone H3 variant
PF3D7_1240000	N/A	3-hydroxyisobutyryl-CoA hydrolase, putative
PF3D7_1464700	N/A	ATP synthase (C/AC39) subunit, putative
PF3D7_1449500	ApiAP2	AP2 domain transcription factor AP2-O5, putative
PF3D7_0933700	N/A	conserved Plasmodium protein, unknown function
PF3D7_0405100	SEC24B	protein transport protein Sec24B, putative
PF3D7_1147300	N/A	conserved Plasmodium protein, unknown function
PF3D7_1124400	LSM1	U6 snRNA-associated Sm-like protein LSm1, putative
PF3D7_0926500	N/A	tetratricopeptide repeat protein, putative
PF3D7_1467100	MAG	DNA-3-methyladenine glycosylase
PF3D7_1445900	DDX17	ATP-dependent RNA helicase DDX17
PF3D7_1125500	SNRPD1	small nuclear ribonucleoprotein Sm D1, putative
PF3D7_1352400	N/A	conserved Plasmodium protein, unknown function
PF3D7_0308200	CCT7	T-complex protein 1 subunit eta
PF3D7_1448000	UTP12	U3 small nucleolar RNA-associated protein 12, putative
PF3D7_0525100	ACS10	acyl-CoA synthetase
PF3D7_0914100	N/A	conserved Plasmodium protein, unknown function
PF3D7_1117900	N/A	conserved Plasmodium protein, unknown function
PF3D7_0104300	UBP1	ubiquitin carboxyl-terminal hydrolase 1, putative
PF3D7_1428200	MFS5	major facilitator superfamily domain-containing protein, putative
PF3D7_1366900	N/A	conserved protein, unknown function
PF3D7_0508700	PRP5	pre-mRNA-processing ATP-dependent RNA helicase PRP5, putative
PF3D7_1445700	N/A	conserved Plasmodium protein, unknown function
PF3D7_0606100	N/A	RNA-binding protein, putative
PF3D7_1405300	N/A	conserved Plasmodium protein, unknown function
PF3D7_0932100	N/A	protein MAM3, putative
PF3D7_0318700	N/A	conserved Plasmodium protein, unknown function
PF3D7_0530900	FRM1	formin 1
PF3D7_0310300	N/A	phosphoglycerate mutase, putative
PF3D7_0103300	N/A	conserved protein, unknown function
PF3D7_0405400	PRPF8	pre-mRNA-processing-splicing factor 8, putative
PF3D7_0110800	N/A	transcription initiation factor TFIIB, putative
PF3D7_1443600	N/A	gamma-tubulin complex component, putative
PF3D7_0108800	N/A	mitochondrial carrier protein, putative
PF3D7_1224500	ASF1	histone chaperone ASF1
PF3D7_1359100	N/A	riboflavin kinase, putative
PF3D7_1441500	N/A	conserved Plasmodium protein, unknown function
PF3D7_1406200	SPT6	transcription elongation factor SPT6, putative
PF3D7_1246200	ACT1	actin I
PF3D7_1453000	N/A	conserved Plasmodium protein, unknown function
PF3D7_0310200	N/A	phd finger protein, putative
PF3D7_0528000	UMP1	proteasome maturation factor UMP1, putative
PF3D7_1403700	TRAM	translocation associated membrane protein, putative
PF3D7_1429600	GEXP03	conserved Plasmodium protein, unknown function
PF3D7_1336800	NUDC	nuclear movement protein, putative
PF3D7_1233900	SENP1	sentrin-specific protease 1
PF3D7_1023700	N/A	conserved Plasmodium protein, unknown function
PF3D7_1133800	N/A	RNA (uracil-5-)methyltransferase, putative
PF3D7_1447200	N/A	conserved protein, unknown function
PF3D7_1121900	PDK1	3-phosphoinositide-dependent protein kinase 1
PF3D7_0914500	N/A	conserved Plasmodium protein, unknown function
PF3D7_1408100	PMIII	plasmepsin III
PF3D7_0501300	SBP1	skeleton-binding protein 1
PF3D7_1129400	NSUN3	RNA cytosine C(5)-methyltransferase, putative
PF3D7_1028600	N/A	conserved Plasmodium protein, unknown function
PF3D7_1450000	N/A	serine/threonine protein kinase, putative
PF3D7_1033600	CEF1	pre-mRNA-splicing factor CEF1, putative
PF3D7_0303300	RPB6	DNA-directed RNA polymerases I, II, and III subunit RPABC2, putative
PF3D7_1016300	GBP130	GBP130 protein
PF3D7_1216900	N/A	DNA-binding chaperone, putative
PF3D7_0611800	N/A	conserved Plasmodium protein, unknown function
PF3D7_1110900	N/A	ES2 protein, putative
PF3D7_1149200	RESA3	ring-infected erythrocyte surface antigen
PF3D7_1116800	HSP101	heat shock protein 101
PF3D7_1122400	N/A	conserved Plasmodium protein, unknown function
PF3D7_1353400	N/A	Ran-binding protein, putative
PF3D7_1108400	CK2alpha	casein kinase 2, alpha subunit
PF3D7_1349500	N/A	conserved Plasmodium protein, unknown function
PF3D7_1468400	D13	zinc finger protein, putative
PF3D7_1243900	DOC2	double C2-like domain-containing protein
PF3D7_1231600	PRP2	pre-mRNA-splicing factor ATP-dependent RNA helicase PRP2, putative
PF3D7_0916000	MFS2	major facilitator superfamily domain-containing protein, putative
PF3D7_1208100	N/A	conserved Plasmodium protein, unknown function
PF3D7_0508500	ND6	ND6 protein, putative
PF3D7_1356600	N/A	regulator of chromosome condensation, putative
PF3D7_1427300	N/A	conserved Plasmodium protein, unknown function
PF3D7_1129900	MFR5	major facilitator superfamily-related transporter, putative
PF3D7_1408600	N/A	40S ribosomal protein S8e, putative
PF3D7_1406100	N/A	tubby domain-containing protein, putative
PF3D7_0720700	PX1	phosphoinositide-binding protein PX1
PF3D7_1416600	N/A	conserved Plasmodium protein, unknown function
PF3D7_0933500	N/A	gamma-tubulin complex component, putative
PF3D7_0915400	PFK9	ATP-dependent 6-phosphofructokinase
PF3D7_1316600	CCT	choline-phosphate cytidylyltransferase
PF3D7_0323700	SART1	U4/U6.U5 tri-snRNP-associated protein 1, putative
PF3D7_1205600	N/A	tetratricopeptide repeat protein, putative
PF3D7_0303100	N/A	CLP1 P-loop domain-containing protein, putative
PF3D7_1007200	N/A	rho GTPase-activating protein, putative
PF3D7_1211200	N/A	conserved Plasmodium protein, unknown function
PF3D7_0422500	BRR2	pre-mRNA-splicing helicase BRR2, putative
PF3D7_0410000	EVP1	erythrocyte vesicle protein 1
PF3D7_1475600	BDP4	bromodomain protein 4, putative
PF3D7_1139800	N/A	conserved Plasmodium protein, unknown function
PF3D7_1121000	DHHC3	palmitoyltransferase DHHC3
PF3D7_1341900	N/A	V-type proton ATPase subunit D, putative
PF3D7_1205500	N/A	zinc finger protein, putative
PF3D7_1468700	eIF4A	eukaryotic initiation factor 4A
PF3D7_0305600	APE1	DNA-(apurinic or apyrimidinic site) endonuclease
PF3D7_1328300	N/A	conserved protein, unknown function
PF3D7_0922900	FabG	3-oxoacyl-[acyl-carrier-protein] reductase
PF3D7_1119800	ASF1	alternative splicing factor ASF-1, putative
PF3D7_0918300	EIF3F	eukaryotic translation initiation factor 3 subunit F, putative
PF3D7_1126000	ThrRS	threonine--tRNA ligase
PF3D7_0814500	N/A	conserved protein, unknown function
PF3D7_0410900	N/A	conserved Plasmodium protein, unknown function
PF3D7_0309200	ARK2	serine/threonine protein kinase ARK2, putative
PF3D7_1104300	N/A	conserved Plasmodium protein, unknown function
PF3D7_0610600	CDPK2	calcium-dependent protein kinase 2
PF3D7_1368800	ERCC4	DNA repair endonuclease XPF, putative
PF3D7_0308700	N/A	conserved protein, unknown function
PF3D7_1026800	RPS2	40S ribosomal protein S2
PF3D7_0501800	CAF1A	chromatin assembly factor 1 subunit A
PF3D7_1031300	N/A	SAE2 domain-containing protein, putative
PF3D7_1427500	MSH2-1	DNA mismatch repair protein MSH2, putative
PF3D7_1037300	AAC1	ADP,ATP carrier protein 1
PF3D7_1015400	N/A	RMI1 domain-containing protein, putative
PF3D7_1237400	N/A	hydrolase, putative
PF3D7_0407700	N/A	conserved Plasmodium protein, unknown function
PF3D7_0113200	N/A	Plasmodium exported protein, unknown function
PF3D7_1410200	CTPS	CTP synthase
PF3D7_1315500	N/A	conserved protein, unknown function
PF3D7_1233200	N/A	conserved Plasmodium protein, unknown function
PF3D7_0202400	PTEF	translation-enhancing factor
PF3D7_0926800	N/A	conserved Plasmodium protein, unknown function
PF3D7_0525000	N/A	zinc finger protein, putative
PF3D7_1340300	N/A	nucleolar complex protein 2, putative
PF3D7_1306400	RPT4	26S protease regulatory subunit 10B, putative
PF3D7_0701600	MC-2TM	Pfmc-2TM Maurer's cleft two transmembrane protein
PF3D7_0932300	M18AAP	M18 aspartyl aminopeptidase
PF3D7_1209200	LSM7	U6 snRNA-associated Sm-like protein LSm7, putative
PF3D7_0530300	PIC6	PhIL1-interacting candidate PIC6
PF3D7_0626400	N/A	CRAL/TRIO domain-containing protein, putative
PF3D7_1309200	PPM6	protein phosphatase PPM6, putative
PF3D7_1438100	SEC62	translocation protein SEC62, putative
PF3D7_0608500	N/A	proteasome subunit alpha type-2, putative
PF3D7_0316600	FNT	formate-nitrite transporter
PF3D7_1129100	PV1	parasitophorous vacuolar protein 1
PF3D7_1234800	SF3B3	splicing factor 3B subunit 3, putative
PF3D7_1461800	N/A	conserved Plasmodium protein, unknown function
PF3D7_1468900	N/A	zinc finger protein, putative
PF3D7_1359400	CELF1	CUGBP Elav-like family member 1
PF3D7_1131800	N/A	oxysterol-binding protein, putative
PF3D7_0516700	N/A	ubiquitin carboxyl-terminal hydrolase 2, putative
PF3D7_0917700	N/A	GPN-loop GTPase, putative
PF3D7_0313000	N/A	conserved Plasmodium protein, unknown function
PF3D7_1010200	N/A	DNA2/NAM7 helicase, putative
PF3D7_0102200	RESA	ring-infected erythrocyte surface antigen
PF3D7_0934800	PKAc	cAMP-dependent protein kinase catalytic subunit
PF3D7_1365700	N/A	SNARE associated Golgi protein, putative
PF3D7_1226600	PCNA2	proliferating cell nuclear antigen 2
PF3D7_1033300	N/A	conserved protein, unknown function
PF3D7_0924500	N/A	conserved Plasmodium membrane protein, unknown function
PF3D7_0919800	N/A	TLD domain-containing protein
PF3D7_0613900	MyoE	myosin E, putative
PF3D7_0519700	N/A	FoP domain-containing protein, putative
PF3D7_1007700	AP2-I	AP2 domain transcription factor AP2-I
PF3D7_0204700	HT1	hexose transporter
PF3D7_1417600	N/A	ookinete surface and oocyst capsule protein OSCP, putative
PF3D7_0818700	N/A	DNA helicase, putative
PF3D7_1214900	N/A	conserved protein, unknown function
PF3D7_1107200	N/A	conserved protein, unknown function
PF3D7_1019700	N/A	conserved Plasmodium protein, unknown function
PF3D7_1324000	N/A	conserved Plasmodium protein, unknown function
PF3D7_0807200	N/A	conserved Plasmodium membrane protein, unknown function
PF3D7_0412200	N/A	conserved Plasmodium protein, unknown function
PF3D7_0714000	H2B.Z	histone H2B variant
PF3D7_1012700	NIF4	NLI interacting factor-like phosphatase, putative
PF3D7_0411800	N/A	conserved Plasmodium protein, unknown function
PF3D7_1401600	N/A	Plasmodium exported protein (PHISTb), unknown function
PF3D7_1126500	N/A	WD repeat-containing protein, putative
PF3D7_1473400	N/A	conserved protein, unknown function
PF3D7_1349600	N/A	conserved Plasmodium protein, unknown function
PF3D7_1032800	LRR1	leucine-rich repeat protein
PF3D7_1314700	N/A	pinin/SDK/MemA domain-containing protein, putative
PF3D7_1033500	WDR70	WD repeat-containing protein 70, putative
PF3D7_0526800	N/A	conserved Plasmodium protein, unknown function
PF3D7_1033200	ETRAMP10.2	early transcribed membrane protein 10.2
PF3D7_0905000	ATPTG4	ATP synthase-associated protein, putative
PF3D7_0525800	IMC1g	inner membrane complex protein 1g, putative
PF3D7_0408300	ZRANB2	zinc finger Ran-binding domain-containing protein 2, putative
PF3D7_0305100	N/A	conserved Plasmodium protein, unknown function
PF3D7_1470300	N/A	conserved Plasmodium protein, unknown function
PF3D7_1337900	N/A	conserved Plasmodium protein, unknown function
PF3D7_1345800	N/A	conserved Plasmodium protein, unknown function
PF3D7_1416100	SEY1	protein SEY1, putative
PF3D7_0203100	N/A	protein kinase, putative
PF3D7_0516400	PhLP1	phosducin-like protein 1, putative
PF3D7_1348300	N/A	elongation factor Tu, putative
PF3D7_0214700	N/A	conserved Plasmodium protein, unknown function
PF3D7_1208800	N/A	zinc finger protein, putative
PF3D7_1359000	N/A	conserved Plasmodium protein, unknown function
PF3D7_1227500	SOC2	protein SOC2, putative
PF3D7_1416900	N/A	prefoldin subunit 2, putative
PF3D7_0729500	MT-A70	N6-adenosine-methyltransferase MT-A70
PF3D7_0931400	N/A	PUB domain-containing protein, putative
PF3D7_1329300	CAF1B	chromatin assembly factor 1 subunit B, putative
PF3D7_0113700	HSP40	heat shock protein 40, type II
PF3D7_0312100	N/A	E3 ubiquitin-protein ligase
PF3D7_0825500	KRI1	protein KRI1, putative
PF3D7_0108500	N/A	ELM2 domain-containing protein, putative
PF3D7_1306800	N/A	RED-like protein, putative
PF3D7_1349200	N/A	glutamate--tRNA ligase, putative
PF3D7_1144600	TFG2	transcription initiation factor IIF subunit beta, putative
PF3D7_1219600	ATP2	phospholipid-transporting ATPase 2
PF3D7_1364200	NUP205	nucleoporin NUP205, putative
PF3D7_0218600	N/A	patatin-like phospholipase, putative
PF3D7_1330800	N/A	RNA-binding protein, putative
PF3D7_0215800	ORC5	origin recognition complex subunit 5
PF3D7_1344700	N/A	conserved Plasmodium protein, unknown function
PF3D7_1136000	N/A	conserved Plasmodium protein, unknown function
PF3D7_1222700	GAP45	glideosome-associated protein 45
PF3D7_0719300	ARP6	actin-related protein ARP6
PF3D7_1030100	PRP22	pre-mRNA-splicing factor ATP-dependent RNA helicase PRP22, putative
PF3D7_1347200	NT1	nucleoside transporter 1
PF3D7_1337400	N/A	zinc finger protein, putative
PF3D7_1354300	N/A	large subunit rRNA methyltransferase, putative
PF3D7_0601900	N/A	conserved Plasmodium protein, unknown function
PF3D7_1455700	N/A	conserved Plasmodium protein, unknown function
PF3D7_0530000	N/A	conserved Plasmodium protein, unknown function
PF3D7_1035900	MAAP	merozoites-associated armadillo repeats protein
PF3D7_0730200	N/A	AP-4 complex subunit beta, putative
PF3D7_0930800	N/A	conserved Plasmodium membrane protein, unknown function
PF3D7_0523900	N/A	MerC domain-containing protein, putative
PF3D7_1419400	N/A	conserved Plasmodium membrane protein, unknown function
PF3D7_1304000	CAPH	condensin complex subunit 2, putative
PF3D7_0723900	N/A	RNA-binding protein, putative
PF3D7_1337500	N/A	conserved Plasmodium protein, unknown function
PF3D7_1142900	N/A	conserved Plasmodium protein, unknown function
PF3D7_0724100	N/A	conserved Plasmodium protein, unknown function
PF3D7_0416400	HAT1	histone acetyltransferase, putative
PF3D7_0517300	SR1	serine/arginine-rich splicing factor 1
PF3D7_1450500	N/A	conserved Plasmodium protein, unknown function
PF3D7_0820500	YIF1	protein transport protein YIF1, putative
PF3D7_0519500	CCR4-1	CCR4 domain-containing protein 1, putative
PF3D7_1424100	RPL5	60S ribosomal protein L5, putative
PF3D7_1002200	PArt	tryptophan-rich antigen 3
PF3D7_0217800	RPS26	40S ribosomal protein S26
PF3D7_0415200	N/A	conserved Plasmodium protein, unknown function
PF3D7_1125800	N/A	kelch domain-containing protein, putative
PF3D7_0815600	EIF3G	eukaryotic translation initiation factor 3 subunit G, putative
PF3D7_1027100	MPP10	U3 small nucleolar ribonucleoprotein protein MPP10, putative
PF3D7_1334700	MSRP7	MSP7-like protein
PF3D7_1318300	N/A	conserved Plasmodium protein, unknown function
PF3D7_1111600	N/A	endonuclease/exonuclease/phosphatase family protein, putative
PF3D7_1013600	N/A	conserved Plasmodium protein, unknown function
PF3D7_1423200	CYP52	peptidyl-prolyl cis-trans isomerase
PF3D7_1133400	AMA1	apical membrane antigen 1
PF3D7_1426800	N/A	conserved Plasmodium protein, unknown function
PF3D7_1235100	N/A	conserved protein, unknown function
PF3D7_0525200	SMC6	structural maintenance of chromosomes protein 6, putative
PF3D7_0316900	N/A	E3 ubiquitin-protein ligase, putative
PF3D7_0809200	pfa55-14	asparagine-rich antigen Pfa55-14
PF3D7_1033900	N/A	ubiquitin-conjugating enzyme E2, putative
PF3D7_0408200	N/A	conserved Plasmodium protein, unknown function
PF3D7_0405700	N/A	lysine decarboxylase, putative
PF3D7_0418100	SOC1	protein SOC1, putative
PF3D7_0527600	N/A	conserved Plasmodium protein, unknown function
PF3D7_0916700	HoMu	RNA-binding protein musashi, putative
PF3D7_1336200	N/A	conserved Plasmodium protein, unknown function
PF3D7_0416000	N/A	RNA-binding protein, putative
PF3D7_0908600	N/A	ribosomal RNA methyltransferase, putative
PF3D7_0424700	FIKK4.2	serine/threonine protein kinase, FIKK family
PF3D7_0522600	N/A	magnesium transporter NIPA, putative
PF3D7_1019900	ATG8	autophagy-related protein 8
PF3D7_1407900	PMI	plasmepsin I
PF3D7_1252100	RON3	rhoptry neck protein 3
PF3D7_0902200	FIKK9.3	serine/threonine protein kinase, FIKK family
PF3D7_0606700	N/A	coatomer alpha subunit, putative
PF3D7_0817300	N/A	conserved Plasmodium protein, unknown function
PF3D7_1361200	N/A	conserved Plasmodium protein, unknown function
PF3D7_0823200	N/A	RNA-binding protein, putative
PF3D7_1317600	N/A	conserved Plasmodium protein, unknown function
PF3D7_1458800	N/A	DNA-directed RNA polymerase III subunit RPC5, putative
PF3D7_1466800	N/A	NOC3 domain-containing protein, putative
PF3D7_1466900	N/A	conserved Plasmodium protein, unknown function
PF3D7_1222300	GRP94	endoplasmin, putative
PF3D7_0522100	N/A	conserved Plasmodium protein, unknown function
PF3D7_1466300	RPN2	26S proteasome regulatory subunit RPN2, putative
PF3D7_1322300	N/A	BRCT domain-containing protein, putative
PF3D7_0810600	DBP1	ATP-dependent RNA helicase DBP1, putative
PF3D7_0809700	RUVB1	RuvB-like helicase 1
PF3D7_0318500	N/A	conserved Plasmodium protein, unknown function
PF3D7_1123400	ERF3	eukaryotic peptide chain release factor GTP-binding subunit, putative
PF3D7_0527900	DDX41	ATP-dependent RNA helicase DDX41, putative
PF3D7_1217200	MRD1	multiple RNA-binding domain-containing protein 1, putative
PF3D7_1103700	CK2beta1	casein kinase II beta chain
PF3D7_1119900	SEC16	protein transport protein SEC16, putative
PF3D7_0218200	N/A	SUZ domain-containing protein, putative
PF3D7_0526500	N/A	conserved Plasmodium protein, unknown function
PF3D7_0625000	SMS1	sphingomyelin synthase 1, putative
PF3D7_1466200	HDP1	homeodomain-like protein HDP1
PF3D7_1104900	N/A	calcium/calmodulin-dependent protein kinase, putative
PF3D7_0627500	DJ1	protein DJ-1
PF3D7_0423600	N/A	conserved Plasmodium protein, unknown function
PF3D7_1117700	RAN	GTP-binding nuclear protein RAN/TC4
PF3D7_0317500	EG5	kinesin-5
PF3D7_0308900	SF3B1	splicing factor 3B subunit 1, putative
PF3D7_1316800	SEC20	protein transport protein SEC20, putative
PF3D7_1334200	N/A	chaperone binding protein, putative
PF3D7_1146000	RSA4	ribosome assembly protein 4, putative
PF3D7_0201900	EMP3	erythrocyte membrane protein 3
PF3D7_0414900	ARO	armadillo-domain containing rhoptry protein
PF3D7_1421100	N/A	conserved Plasmodium protein, unknown function
PF3D7_0522900	N/A	zinc finger protein, putative
PF3D7_1302100	G27/25	gamete antigen 27/25
PF3D7_1206800	N/A	conserved Plasmodium protein, unknown function
PF3D7_1035000	N/A	U2 snRNA/tRNA pseudouridine synthase, putative
PF3D7_0520200	MED17	mediator of RNA polymerase II transcription subunit 17, putative
PF3D7_0617100	N/A	AP-2 complex subunit alpha, putative
PF3D7_0605800	RAD50	DNA repair protein RAD50, putative
PF3D7_1119700	N/A	conserved Plasmodium protein, unknown function
PF3D7_0935900	REX1	ring-exported protein 1
PF3D7_0802800	CNA	serine/threonine protein phosphatase 2B catalytic subunit A
PF3D7_0917900	BIP	heat shock protein 70
PF3D7_0821000	N/A	conserved Plasmodium protein, unknown function
PF3D7_1360700	PIAS	E3 SUMO-protein ligase PIAS, putative
PF3D7_0500800	MESA	mature parasite-infected erythrocyte surface antigen
PF3D7_0709300	MED14	mediator of RNA polymerase II transcription subunit 14, putative
PF3D7_1444800	FBPA	fructose-bisphosphate aldolase
PF3D7_0828300	N/A	conserved protein, unknown function
PF3D7_1318800	SEC63	translocation protein SEC63, putative
PF3D7_1303700	N/A	tetratricopeptide repeat protein, putative
PF3D7_0922200	SAMS	S-adenosylmethionine synthetase
PF3D7_1006800	GBP2	G-strand-binding protein 2
PF3D7_1223200	N/A	nucleus export protein BRR6, putative
PF3D7_1323800	VPS52	vacuolar protein sorting-associated protein 52, putative
PF3D7_1012900	ATG18	autophagy-related protein 18
PF3D7_0307100	RPS12	40S ribosomal protein S12, putative
PF3D7_0802100	AP2-LT	AP2 domain transcription factor AP2-LT
PF3D7_1307500	N/A	conserved Plasmodium protein, unknown function
PF3D7_0312500	MFR3	multidrug-resistant modulator MFR3
PF3D7_1002000	N/A	Plasmodium exported protein (hyp2), unknown function
PF3D7_0802400	N/A	cyclin-like protein, putative
PF3D7_0509500	N/A	ERCC4 domain-containing protein, putative
PF3D7_0616600	N/A	conserved protein, unknown function
PF3D7_1448600	VTI1	SNARE protein, putative
PF3D7_0827000	DBP10	ATP-dependent RNA helicase DBP10, putative
PF3D7_1328100	N/A	proteasome subunit beta type-7, putative
PF3D7_0216700	ATG11	autophagy-related protein 11, putative
PF3D7_0406200	Pfs16	parasitophorous vacuole membrane protein S16
PF3D7_1006200	ALBA3	DNA/RNA-binding protein Alba 3
PF3D7_1128000	N/A	conserved Plasmodium protein, unknown function
PF3D7_1364800	RPB5	DNA-directed RNA polymerases I, II, and III subunit RPABC1, putative
PF3D7_0514900	N/A	conserved Plasmodium protein, unknown function
PF3D7_0706000	N/A	importin-7, putative
PF3D7_0614900	N/A	conserved Plasmodium membrane protein, unknown function
PF3D7_0714300	DHHC4	palmitoyltransferase DHHC4, putative
PF3D7_0516800	ApiAP2	AP2 domain transcription factor AP2-O2, putative
PF3D7_0725000	N/A	exonuclease I, putative
PF3D7_0831300	GEXP13	Plasmodium exported protein, unknown function
PF3D7_1123200	LRR11	leucine-rich repeat protein
PF3D7_1008900	AK1	adenylate kinase
PF3D7_0813500	N/A	PUB domain-containing protein, putative
PF3D7_0309500	AS	asparagine synthetase [glutamine-hydrolyzing], putative
PF3D7_0706400	RPL37	60S ribosomal protein L37
PF3D7_0704000	N/A	conserved Plasmodium membrane protein, unknown function
PF3D7_1445200	MAK5	ATP-dependent RNA helicase MAK5, putative
PF3D7_1417800	MCM2	DNA replication licensing factor MCM2
PF3D7_1313100	N/A	conserved Plasmodium protein, unknown function
PF3D7_1359700	N/A	conserved Plasmodium protein, unknown function
PF3D7_0602100	MTR4	ATP-dependent RNA helicase MTR4
PF3D7_1019600	N/A	conserved Plasmodium protein, unknown function
PF3D7_1338700	N/A	conserved protein, unknown function
PF3D7_1200700	ACS7	acyl-CoA synthetase
PF3D7_0827800	SET3	SET domain protein, putative
PF3D7_1031100	N/A	conserved Plasmodium protein, unknown function
PF3D7_0414600	APH	acylated pleckstrin-homology domain-containing protein, putative
PF3D7_1136400	SRP72	signal recognition particle subunit SRP72, putative
PF3D7_0416500	MAF1	repressor of RNA polymerase III transcription MAF1
PF3D7_0919100	N/A	DnaJ protein, putative
PF3D7_1465900	N/A	40S ribosomal protein S3
PF3D7_1031800	N/A	conserved protein, unknown function
PF3D7_1315300	N/A	conserved protein, unknown function
PF3D7_1136300	TSN	tudor staphylococcal nuclease
PF3D7_0505800	SUMO	small ubiquitin-related modifier
PF3D7_0519800	N/A	EELM2 domain-containing protein, putative
PF3D7_1127600	N/A	CRAL/TRIO domain-containing protein, putative
PF3D7_1401400	ETRAMP14	early transcribed membrane protein 14.1
PF3D7_1249100	N/A	THUMP domain-containing protein, putative
PF3D7_0315800	N/A	zinc finger protein, putative
PF3D7_1209000	N/A	mago-binding protein, putative
PF3D7_1011200	BET1	BET1-like protein, putative
PF3D7_1109400	ENP1	essential nuclear protein 1, putative
PF3D7_1431300	LSG1	large subunit GTPase 1, putative
PF3D7_1409600	N/A	histidine phosphatase, putative
PF3D7_1140700	N/A	chromo domain-containing protein, putative
PF3D7_1202100	SRAP1	SRAP domain-containing protein, putative
PF3D7_1120100	PGM1	phosphoglycerate mutase, putative
PF3D7_0603000	N/A	SDE2 domain-containing protein, putative
PF3D7_1351400	N/A	60S ribosomal protein L17, putative
PF3D7_1372400	ACS4	acyl-CoA synthetase
PF3D7_0526400	N/A	conserved Plasmodium protein, unknown function
PF3D7_1243700	N/A	ubiquitin-conjugating enzyme E2, putative
PF3D7_1031600	GEXP15	protein GEXP15
PF3D7_0218700	PRP45	pre-mRNA-processing protein 45, putative
PF3D7_0908300	N/A	conserved protein, unknown function
PF3D7_0307600	N/A	conserved Plasmodium protein, unknown function
PF3D7_0926400	N/A	monocarboxylate transporter, putative
PF3D7_0719500	CDC50A	LEM3/CDC50 family protein, putative
PF3D7_1452500	STX6	syntaxin-6, putative
PF3D7_1342000	N/A	40S ribosomal protein S6
PF3D7_1451100	eEF2	elongation factor 2
PF3D7_0929200	N/A	RNA-binding protein, putative
PF3D7_1122900	N/A	dynein heavy chain, putative
PF3D7_0821300	DHX36	ATP-dependent RNA helicase DHX36, putative
PF3D7_0212100	N/A	conserved Plasmodium protein, unknown function
PF3D7_0114100	MC-2TM	Pfmc-2TM Maurer's cleft two transmembrane protein
PF3D7_0817900	HMGB2	high mobility group protein B2
PF3D7_1342600	MyoA	myosin A
PF3D7_1353100	N/A	Plasmodium exported protein, unknown function
PF3D7_0711500	N/A	regulator of chromosome condensation, putative
PF3D7_0316700	YOP1	protein YOP1, putative
PF3D7_0424600	N/A	Plasmodium exported protein (PHISTb)
PF3D7_0709700	PARE	prodrug activation and resistance esterase
PF3D7_1142500	RPL28	60S ribosomal protein L28
PF3D7_1434500	N/A	dynein-related AAA-type ATPase, putative
PF3D7_1472300	N/A	conserved protein, unknown function
PF3D7_0411900	N/A	DNA polymerase alpha catalytic subunit A
PF3D7_0112200	MRP1	multidrug resistance-associated protein 1
PF3D7_0509400	RNAPI	RNA polymerase I
PF3D7_1326300	N/A	RNA-binding protein, putative
PF3D7_1354900	N/A	conserved Plasmodium protein, unknown function
PF3D7_1123000	N/A	conserved Plasmodium protein, unknown function
PF3D7_1417300	ATG4	cysteine protease ATG4, putative
PF3D7_1417500	CBF5	H/ACA ribonucleoprotein complex subunit 4, putative
PF3D7_1468800	U2AF2	splicing factor U2AF large subunit, putative
PF3D7_1013500	PI-PLC	phosphoinositide-specific phospholipase C
PF3D7_1348600	N/A	conserved Plasmodium protein, unknown function
PF3D7_0609800	DHHC2	palmitoyltransferase DHHC2, putative
PF3D7_1010300	SDH4	succinate dehydrogenase subunit 4, putative
PF3D7_0102500	EBA181	erythrocyte binding antigen-181
PF3D7_0102600	FIKK1	serine/threonine protein kinase, FIKK family
PF3D7_0103100	VPS51	vacuolar protein sorting-associated protein 51, putative
PF3D7_0103900	PIESP15	parasite-infected erythrocyte surface protein
PF3D7_0104100	N/A	protein E140, putative
PF3D7_0105600	N/A	FtsJ-like methyltransferase, putative
PF3D7_0105800	N/A	cyclin-dependent kinases regulatory subunit, putative
PF3D7_0106100	N/A	V-type proton ATPase subunit C, putative
PF3D7_0106400	N/A	pre-rRNA-processing protein TSR2, putative
PF3D7_0107800	MRE11	double-strand break repair protein MRE11
PF3D7_0107900	N/A	conserved Plasmodium protein, unknown function
PF3D7_0108700	PSOP24	secreted ookinete protein, putative
PF3D7_0110400	RPB9	DNA-directed RNA polymerase II subunit RPB9, putative
PF3D7_0110500	BDP3	bromodomain protein 3, putative
PF3D7_0111000	N/A	kinesin-8B, putative
PF3D7_0111400	GEXP19	conserved Plasmodium protein, unknown function
PF3D7_0111600	N/A	conserved Plasmodium protein, unknown function
PF3D7_0111800	N/A	eukaryotic translation initiation factor 4E, putative
PF3D7_0113000	GARP	glutamic acid-rich protein GARP
PF3D7_0113100	SURF1.1	surface-associated interspersed protein 1.1 (SURFIN 1.1)
PF3D7_0113900	CBP1	CX3CL1-binding protein 1
PF3D7_0114000	EPF1	exported protein family 1
PF3D7_0201500	N/A	Plasmodium exported protein (hyp9), unknown function
PF3D7_0201700	N/A	DnaJ protein, putative
PF3D7_0202200	PTP1	EMP1-trafficking protein
PF3D7_0203200	N/A	conserved Plasmodium protein, unknown function
PF3D7_0203400	N/A	conserved protein, unknown function
PF3D7_0204100	N/A	Sel1 repeat-containing protein, putative
PF3D7_0204200	SEC66	translocation protein SEC66, putative
PF3D7_0204500	AspAT	aspartate transaminase
PF3D7_0205800	PH1	PH domain-containing protein, putative
PF3D7_0205900	RPN1	26S proteasome regulatory subunit RPN1, putative
PF3D7_0206500	N/A	conserved Plasmodium protein, unknown function
PF3D7_0206900	MSP5	merozoite surface protein 5
PF3D7_0208200	KRR1	KRR1 small subunit processome component, putative
PF3D7_0208300	N/A	conserved Plasmodium protein, unknown function
PF3D7_0208500	ACP	acyl carrier protein
PF3D7_0209500	N/A	conserved Plasmodium protein, unknown function
PF3D7_0209600	N/A	transporter, putative
PF3D7_0210200	N/A	conserved Plasmodium protein, unknown function
PF3D7_0210300	N/A	monocarboxylate transporter, putative
PF3D7_0211200	RAB5a	ras-related protein Rab-5A
PF3D7_0211700	TKL1	tyrosine kinase-like protein, putative
PF3D7_0211800	AsnRS	asparagine--tRNA ligase
PF3D7_0212300	ERF1	eukaryotic peptide chain release factor subunit 1, putative
PF3D7_0212900	ATEL1	arginyl-tRNA--protein transferase
PF3D7_0213700	N/A	conserved protein, unknown function
PF3D7_0214000	CCT8	T-complex protein 1 subunit theta
PF3D7_0214900	RON6	rhoptry neck protein 6
PF3D7_0215200	N/A	conserved Plasmodium protein, unknown function
PF3D7_0215300	ACS8	acyl-CoA synthetase
PF3D7_0215700	RPB2	DNA-directed RNA polymerase II subunit RPB2, putative
PF3D7_0216400	VPS45	vacuolar protein sorting-associated protein 45
PF3D7_0216600	N/A	sugar transporter, putative
PF3D7_0216800	N/A	TMEM121 domain-containing protein, putative
PF3D7_0217700	N/A	E2F-associated phosphoprotein, putative
PF3D7_0219200	RPS30	40S ribosomal protein S30
PF3D7_0219400	N/A	ribosome associated membrane protein RAMP4, putative
PF3D7_0219700	GEXP20	Plasmodium exported protein (PHISTc), unknown function
PF3D7_0220000	LSA3	liver stage antigen 3
PF3D7_0220100	N/A	DnaJ protein, putative
PF3D7_0220800	CLAG2	cytoadherence linked asexual protein 2
PF3D7_0221200	N/A	Plasmodium exported protein (hyp15), unknown function
PF3D7_0221700	N/A	Plasmodium exported protein, unknown function
PF3D7_0222100	MC-2TM	Pfmc-2TM Maurer's cleft two transmembrane protein
PF3D7_0301700	N/A	Plasmodium exported protein, unknown function
PF3D7_0302000	PRP46	pre-mRNA-splicing factor PRP46, putative
PF3D7_0302200	CLAG3.2	cytoadherence linked asexual protein 3.2
PF3D7_0302500	CLAG3.1	cytoadherence linked asexual protein 3.1
PF3D7_0302600	ABCB4	ABC transporter B family member 4, putative
PF3D7_0303000	NSF	N-ethylmaleimide-sensitive fusion protein
PF3D7_0304000	IMC1a	inner membrane complex protein 1a, putative
PF3D7_0304200	EHD	EH domain-containing protein
PF3D7_0304400	RPL44	60S ribosomal protein L44
PF3D7_0304800	N/A	conserved Plasmodium membrane protein, unknown function
PF3D7_0305300	N/A	transporter, putative
PF3D7_0305700	N/A	ubiquitin-conjugating enzyme MMS2, putative
PF3D7_0306100	N/A	conserved Plasmodium protein, unknown function
PF3D7_0306700	EMC5	ER membrane protein complex subunit 5, putative
PF3D7_0306800	CCT2	T-complex protein 1 subunit beta
PF3D7_0306900	N/A	40S ribosomal protein S23, putative
PF3D7_0309600	PfP2	60S acidic ribosomal protein P2
PF3D7_0310500	DHX57	ATP-dependent RNA helicase DHX57, putative
PF3D7_0310600	EIF3K	eukaryotic translation initiation factor 3 subunit K, putative
PF3D7_0314200	N/A	conserved Plasmodium protein, unknown function
PF3D7_0314400	PPP6	serine/threonine protein phosphatase 6, putative
PF3D7_0314600	N/A	conserved protein, unknown function
PF3D7_0314800	N/A	conserved Plasmodium protein, unknown function
PF3D7_0315100	eIF4E	eukaryotic translation initiation factor 4E
PF3D7_0315600	N/A	zinc finger protein, putative
PF3D7_0316200	N/A	conserved Plasmodium protein, unknown function
PF3D7_0316300	PPase	inorganic pyrophosphatase
PF3D7_0316800	N/A	40S ribosomal protein S15A, putative
PF3D7_0317400	N/A	DNA replication complex GINS protein, putative
PF3D7_0317600	RPS11	40S ribosomal protein S11, putative
PF3D7_0317900	N/A	conserved protein, unknown function
PF3D7_0319200	CCR4-4	CCR4 domain-containing protein 4, putative
PF3D7_0319400	N/A	kinesin-8X
PF3D7_0319500	N/A	RNA-binding protein, putative
PF3D7_0319700	ABCI3	ABC transporter I family member 1, putative
PF3D7_0320100	SEC22	protein transport protein SEC22
PF3D7_0320800	DOZI	ATP-dependent RNA helicase DDX6
PF3D7_0320900	H2A.Z	histone H2A.Z
PF3D7_0321000	N/A	conserved protein, unknown function
PF3D7_0321500	N/A	peptidase, putative
PF3D7_0321700	N/A	conserved Plasmodium protein, unknown function
PF3D7_0321900	CARL	cyclic amine resistance locus protein
PF3D7_0322000	CYP19A	peptidyl-prolyl cis-trans isomerase
PF3D7_0322100	Prt1	mRNA-capping enzyme subunit beta
PF3D7_0322400	N/A	regulator of initiation factor 2 (eIF2)
PF3D7_0323000	TMA7	translation machinery-associated protein 7, putative
PF3D7_0323100	N/A	conserved Plasmodium protein, unknown function
PF3D7_0323500	SMN	survival motor neuron-like protein
PF3D7_0323800	N/A	conserved Plasmodium protein, unknown function
PF3D7_0324800	RIF	rifin
PF3D7_0400400	VAR	erythrocyte membrane protein 1, PfEMP1
PF3D7_0402100	N/A	Plasmodium exported protein (PHISTb), unknown function
PF3D7_0403200	N/A	pre-mRNA splicing factor, putative
PF3D7_0403400	N/A	conserved Plasmodium protein, unknown function
PF3D7_0403700	CLF1	pre-mRNA-splicing factor CLF1, putative
PF3D7_0404300	N/A	conserved Plasmodium protein, unknown function
PF3D7_0404600	N/A	conserved Plasmodium membrane protein, unknown function
PF3D7_0404900	P41	6-cysteine protein P41
PF3D7_0405200	CERLI2	protein CERLI2
PF3D7_0405600	N/A	TMEM33 domain-containing protein, putative
PF3D7_0406000	N/A	conserved protein, unknown function
PF3D7_0406100	N/A	V-type proton ATPase subunit B
PF3D7_0406500	N/A	NYN domain-containing protein, putative
PF3D7_0406900	N/A	conserved Plasmodium protein, unknown function
PF3D7_0407000	N/A	conserved Plasmodium protein, unknown function
PF3D7_0407300	N/A	transcription factor, putative
PF3D7_0407600	N/A	conserved Plasmodium protein, unknown function
PF3D7_0407900	N/A	AAA family ATPase, putative
PF3D7_0408100	N/A	conserved Plasmodium protein, unknown function
PF3D7_0409700	RF2	peptide chain release factor 2
PF3D7_0410300	PPM1	protein phosphatase PPM1, putative
PF3D7_0410500	N/A	conserved Plasmodium protein, unknown function
PF3D7_0411000	N/A	conserved Plasmodium protein, unknown function
PF3D7_0411100	MED8	mediator of RNA polymerase II transcription subunit 8, putative
PF3D7_0412700	VAR	erythrocyte membrane protein 1, PfEMP1
PF3D7_0412900	VAR	erythrocyte membrane protein 1, PfEMP1
PF3D7_0413100	VAR	erythrocyte membrane protein 1, PfEMP1
PF3D7_0413700	N/A	lysine decarboxylase-like protein, putative
PF3D7_0414400	N/A	conserved Plasmodium protein, unknown function
PF3D7_0415800	N/A	PhIL1-interacting candidate PIC3
PF3D7_0415900	N/A	60S ribosomal protein L15, putative
PF3D7_0416300	MCM9	DNA helicase MCM9, putative
PF3D7_0416800	SAR1	small GTP-binding protein sar1
PF3D7_0416900	N/A	conserved Plasmodium protein, unknown function
PF3D7_0418300	N/A	conserved Plasmodium protein, unknown function
PF3D7_0418500	BET3	trafficking protein particle complex subunit 3, putative
PF3D7_0418700	N/A	RNA-binding protein NOB1, putative
PF3D7_0419500	N/A	conserved Plasmodium membrane protein, unknown function
PF3D7_0419600	RANBP1	ran-specific GTPase-activating protein 1, putative
PF3D7_0419900	N/A	phosphatidylinositol 4-kinase, putative
PF3D7_0422200	N/A	erythrocyte membrane-associated antigen
PF3D7_0422700	EIF4A3	eukaryotic initiation factor 4A-III, putative
PF3D7_0423400	AARP	apical asparagine-rich protein AARP
PF3D7_0424500	FIKK4.1	serine/threonine protein kinase, FIKK family
PF3D7_0501200	PIESP2	parasite-infected erythrocyte surface protein
PF3D7_0501600	RAP2	rhoptry-associated protein 2
PF3D7_0502000	VPS11	vacuolar protein sorting-associated protein 11, putative
PF3D7_0502300	N/A	conserved Plasmodium protein, unknown function
PF3D7_0503400	ADF1	actin-depolymerizing factor 1
PF3D7_0503500	N/A	protein kinase, putative
PF3D7_0503600	MyoB	myosin B
PF3D7_0505900	MED11	mediator of RNA polymerase II transcription subunit 11, putative
PF3D7_0506100	N/A	60S ribosomal subunit protein L24, putative
PF3D7_0506200	TBP	TATA-box-binding protein
PF3D7_0506700	N/A	GTPase-activating protein, putative
PF3D7_0507700	NPL4	nuclear protein localization protein 4, putative
PF3D7_0508300	TPT	triose phosphate transporter
PF3D7_0508600	N/A	conserved protein, unknown function
PF3D7_0509100	SMC4	structural maintenance of chromosomes protein 4, putative
PF3D7_0509900	N/A	NSE4 domain-containing protein, putative
PF3D7_0510200	CYP87	peptidyl-prolyl cis-trans isomerase
PF3D7_0510500	TopoI	topoisomerase I
PF3D7_0511000	TCTP	translationally-controlled tumor protein homolog
PF3D7_0511300	N/A	MORN repeat protein, putative
PF3D7_0511800	INO1	inositol-3-phosphate synthase
PF3D7_0512000	PFD6	prefoldin subunit 6
PF3D7_0512300	MAT1	CDK-activating kinase assembly factor MAT1
PF3D7_0512600	RAB1b	ras-related protein Rab-1B
PF3D7_0513200	N/A	CPSF domain-containing protein, putative
PF3D7_0513300	PNP	purine nucleoside phosphorylase
PF3D7_0513800	RAB1a	ras-related protein Rab-1A
PF3D7_0514100	UvrD	ATP-dependent DNA helicase UvrD
PF3D7_0515000	CWC2	pre-mRNA-splicing factor CWC2, putative
PF3D7_0515600	GEP	gamete egress protein GEP, putative
PF3D7_0515900	NIF2	NLI interacting factor-like phosphatase, putative
PF3D7_0516200	RPS11	40S ribosomal protein S11
PF3D7_0516500	MFS1	major facilitator superfamily domain-containing protein, putative
PF3D7_0516900	RPL2	60S ribosomal protein L2
PF3D7_0517000	N/A	60S ribosomal protein L12, putative
PF3D7_0518600	WDR26	WD repeat-containing protein 26, putative
PF3D7_0518900	N/A	conserved protein, unknown function
PF3D7_0519400	RPS24	40S ribosomal protein S24
PF3D7_0519600	N/A	zinc finger protein, putative
PF3D7_0520100	PPM9	protein phosphatase PPM9, putative
PF3D7_0520700	N/A	CDC73 domain-containing protein, putative
PF3D7_0520900	SAHH	adenosylhomocysteinase
PF3D7_0521900	N/A	conserved Plasmodium protein, unknown function
PF3D7_0523400	N/A	DnaJ protein, putative
PF3D7_0523800	N/A	divalent metal transporter, putative
PF3D7_0524000	KASbeta	karyopherin beta
PF3D7_0524500	N/A	conserved Plasmodium protein, unknown function
PF3D7_0524800	UFD1	ubiquitin fusion degradation protein 1, putative
PF3D7_0525300	N/A	conserved protein, unknown function
PF3D7_0527200	USP14	ubiquitin carboxyl-terminal hydrolase 14
PF3D7_0527500	HIP	Hsc70-interacting protein
PF3D7_0528200	EIF3E	eukaryotic translation initiation factor 3 subunit E, putative
PF3D7_0528700	CYP23	peptidyl-prolyl cis-trans isomerase
PF3D7_0528800	N/A	nuclear GTP-binding protein, putative
PF3D7_0530100	SYN6	SNARE protein, putative
PF3D7_0530600	N/A	XAP-5 DNA binding protein, putative
PF3D7_0531300	N/A	conserved Plasmodium protein, unknown function
PF3D7_0600200	VAR	erythrocyte membrane protein 1, PfEMP1
PF3D7_0601500	N/A	Plasmodium exported protein (PHISTb), unknown function
PF3D7_0603100	N/A	RNA-binding protein, putative
PF3D7_0603500	CAX	cation/H+ antiporter
PF3D7_0603600	N/A	AT-rich interactive domain-containing protein, putative
PF3D7_0603900	N/A	conserved Plasmodium protein, unknown function
PF3D7_0604000	N/A	conserved Plasmodium protein, unknown function
PF3D7_0604300	N/A	conserved Plasmodium protein, unknown function
PF3D7_0605300	ARK1	serine/threonine protein kinase ARK1
PF3D7_0605900	N/A	elongation of fatty acids protein, putative
PF3D7_0606600	N/A	conserved Plasmodium protein, unknown function
PF3D7_0607200	N/A	RING zinc finger protein, putative
PF3D7_0607600	SAS6	spindle assembly abnormal protein 6, putative
PF3D7_0607700	N/A	conserved Plasmodium protein, unknown function
PF3D7_0608800	OAT	ornithine aminotransferase
PF3D7_0608900	N/A	conserved Plasmodium protein, unknown function
PF3D7_0609300	N/A	conserved Plasmodium protein, unknown function
PF3D7_0609900	N/A	conserved Plasmodium protein, unknown function
PF3D7_0612400	N/A	conserved Plasmodium protein, unknown function
PF3D7_0613500	N/A	AP-3 complex subunit beta, putative
PF3D7_0613600	N/A	conserved Plasmodium protein, unknown function
PF3D7_0613700	N/A	syntaxin-binding protein, putative
PF3D7_0614100	N/A	filamin domain-containing protein, putative
PF3D7_0614200	NAR1	cytosolic Fe-S cluster assembly factor NAR1, putative
PF3D7_0614700	N/A	F-box protein FBXO6, putative
PF3D7_0615000	N/A	conserved Plasmodium protein, unknown function
PF3D7_0616000	PDXK	pyridoxal kinase
PF3D7_0616300	N/A	conserved Plasmodium protein, unknown function
PF3D7_0617300	N/A	RNA-binding protein, putative
PF3D7_0618500	MDH	malate dehydrogenase
PF3D7_0618700	N/A	trafficking protein particle complex subunit 6A, putative
PF3D7_0619300	N/A	conserved Plasmodium protein, unknown function
PF3D7_0619700	N/A	F-box protein FBXO1, putative
PF3D7_0619800	N/A	conserved Plasmodium membrane protein, unknown function
PF3D7_0620500	N/A	cleavage stimulation factor subunit 1, putative
PF3D7_0621200	PDX1	pyridoxine biosynthesis protein PDX1
PF3D7_0621400	ALV7	Pf77 protein
PF3D7_0621800	N/A	nascent polypeptide-associated complex subunit alpha, putative
PF3D7_0622200	MIAB	tRNA-2-methylthio-N(6)-dimethylallyladenosine synthase
PF3D7_0622900	AP2Tel	AP2 domain transcription factor AP2Tel
PF3D7_0623600	N/A	splicing factor-like protein 1, putative
PF3D7_0624200	N/A	SURP domain-containing protein, putative
PF3D7_0625800	N/A	conserved Plasmodium protein, unknown function
PF3D7_0627300	RNF5	E3 ubiquitin-protein ligase RNF5, putative
PF3D7_0627700	N/A	transportin
PF3D7_0627900	POP4	ribonuclease P protein subunit p29, putative
PF3D7_0628500	N/A	conserved Plasmodium protein, unknown function
PF3D7_0629100	NAPRT	nicotinate phosphoribosyltransferase, putative
PF3D7_0629400	PABP3	polyadenylate-binding protein 3, putative
PF3D7_0629800	N/A	cullin-2, putative
PF3D7_0630900	HAS1	ATP-dependent RNA helicase HAS1
PF3D7_0631000	N/A	tetratricopeptide repeat protein, putative
PF3D7_0632500	VAR	erythrocyte membrane protein 1, PfEMP1
PF3D7_0702400	SEMP1	small exported membrane protein 1
PF3D7_0703500	N/A	erythrocyte membrane-associated antigen
PF3D7_0703600	N/A	conserved protein, unknown function
PF3D7_0704700	PPAT	phosphopantetheine adenylyltransferase, putative
PF3D7_0705000	N/A	mRNA cap guanine-N7 methyltransferase, putative
PF3D7_0706300	N/A	conserved Plasmodium protein, unknown function
PF3D7_0707200	N/A	conserved Plasmodium protein, unknown function
PF3D7_0707400	N/A	AAA family ATPase, putative
PF3D7_0707500	N/A	conserved Plasmodium protein, unknown function
PF3D7_0708000	N/A	cytoskeleton associated protein, putative
PF3D7_0708500	N/A	heat shock protein 86 family protein
PF3D7_0709600	POP1	ribonucleases P/MRP protein subunit POP1, putative
PF3D7_0709900	N/A	hydrolase, putative
PF3D7_0710800	USE1	protein transport protein USE1, putative
PF3D7_0711300	N/A	conserved Plasmodium protein, unknown function
PF3D7_0712000	VAR	erythrocyte membrane protein 1, PfEMP1
PF3D7_0712300	VAR	erythrocyte membrane protein 1, PfEMP1
PF3D7_0712600	VAR	erythrocyte membrane protein 1, PfEMP1
PF3D7_0714600	N/A	conserved protein, unknown function
PF3D7_0716100	SDA1	protein SDA1, putative
PF3D7_0716300	N/A	conserved protein, unknown function
PF3D7_0717100	N/A	CRAL/TRIO domain-containing protein, putative
PF3D7_0717300	N/A	transcription initiation factor IIE subunit alpha, putative
PF3D7_0717400	N/A	queuine tRNA-ribosyltransferase, putative
PF3D7_0717500	CDPK4	calcium-dependent protein kinase 4
PF3D7_0717800	N/A	conserved Plasmodium protein, unknown function
PF3D7_0718100	EST	exported serine/threonine protein kinase
PF3D7_0721000	N/A	conserved Plasmodium membrane protein, unknown function
PF3D7_0721100	N/A	conserved protein, unknown function
PF3D7_0721200	N/A	conserved Plasmodium protein, unknown function
PF3D7_0721600	N/A	40S ribosomal protein S5, putative
PF3D7_0722400	OLA1	Obg-like ATPase 1, putative
PF3D7_0722500	CWC15	pre-mRNA-splicing factor CWC15, putative
PF3D7_0722600	UTP7	U3 small nucleolar RNA-associated protein 7, putative
PF3D7_0724000	N/A	Rab GTPase activator and protein kinase, putative
PF3D7_0724600	N/A	protein kinase, putative
PF3D7_0725100	N/A	conserved Plasmodium membrane protein, unknown function
PF3D7_0725300	N/A	conserved protein, unknown function
PF3D7_0726100	N/A	Plasmodium exported protein, unknown function
PF3D7_0726300	PMS1	DNA mismatch repair protein PMS1, putative
PF3D7_0726600	N/A	conserved Plasmodium protein, unknown function
PF3D7_0727900	N/A	conserved Plasmodium protein, unknown function
PF3D7_0728100	N/A	anaphase-promoting complex subunit 1, putative
PF3D7_0728900	N/A	RNA-binding protein, putative
PF3D7_0729400	N/A	ribosome biogenesis protein BRX1, putative
PF3D7_0730400	IMP2	IMP1-like protein, putative
PF3D7_0730800	N/A	Plasmodium exported protein, unknown function
PF3D7_0731800	GEXP08	alpha/beta hydrolase, putative
PF3D7_0802300	PWP2	periodic tryptophan protein 2, putative
PF3D7_0803000	CYP81	peptidyl-prolyl cis-trans isomerase
PF3D7_0803100	UTP14	U3 small nucleolar RNA-associated protein 14, putative
PF3D7_0803300	MORG1	mitogen-activated protein kinase organizer 1, putative
PF3D7_0803400	RAD54	DNA repair and recombination protein RAD54, putative
PF3D7_0803600	N/A	conserved Plasmodium protein, unknown function
PF3D7_0804300	N/A	zinc finger protein, putative
PF3D7_0806000	N/A	AAA family ATPase, putative
PF3D7_0806100	N/A	conserved Plasmodium protein, unknown function
PF3D7_0806300	FLP	ferlin-like protein, putative
PF3D7_0806500	N/A	DnaJ protein, putative
PF3D7_0806700	N/A	conserved Plasmodium membrane protein, unknown function
PF3D7_0807100	PSH3	DNA helicase PSH3
PF3D7_0807300	RAB18	ras-related protein Rab-18
PF3D7_0807900	TyrRS	tyrosine--tRNA ligase
PF3D7_0809100	VAR	erythrocyte membrane protein 1, PfEMP1
PF3D7_0809600	N/A	peptidase family C50, putative
PF3D7_0809900	JmjC1	JmjC domain-containing protein 1, putative
PF3D7_0810000	N/A	acyl-CoA binding protein, putative
PF3D7_0811400	N/A	conserved protein, unknown function
PF3D7_0812300	SSP3	sporozoite surface protein 3, putative
PF3D7_0812700	SNRPC	U1 small nuclear ribonucleoprotein C, putative
PF3D7_0812800	N/A	zinc finger protein, putative
PF3D7_0813600	N/A	translation initiation factor SUI1, putative
PF3D7_0814000	N/A	60S ribosomal protein L13-2, putative
PF3D7_0814400	N/A	phospholipase DDHD1, putative
PF3D7_0815500	N/A	conserved Plasmodium protein, unknown function
PF3D7_0816000	RRB1	ribosome assembly protein RRB1, putative
PF3D7_0816500	HSP20	small heat shock protein HSP20, putative
PF3D7_0817200	N/A	conserved protein, unknown function
PF3D7_0817600	N/A	conserved protein, unknown function
PF3D7_0818100	N/A	zinc finger protein, putative
PF3D7_0819000	N/A	ribonuclease, putative
PF3D7_0819600	N/A	ubiquitin-like protein, putative
PF3D7_0819900	LSM3	U6 snRNA-associated Sm-like protein LSm3, putative
PF3D7_0821100	PK1	protein kinase 1
PF3D7_0823000	VPS15	serine/threonine protein kinase VPS15, putative
PF3D7_0824200	N/A	conserved Plasmodium protein, unknown function
PF3D7_0824600	DRE2	Fe-S cluster assembly protein DRE2, putative
PF3D7_0825300	N/A	SAYSvFN domain-containing protein, putative
PF3D7_0825900	N/A	conserved Plasmodium protein, unknown function
PF3D7_0826600	VAMP7	SNARE protein, putative
PF3D7_0827300	N/A	conserved Plasmodium protein, unknown function
PF3D7_0827900	PDI8	protein disulfide-isomerase
PF3D7_0828000	ROM3	rhomboid protease ROM3
PF3D7_0829400	N/A	prolyl 4-hydroxylase subunit alpha, putative
PF3D7_0830900	N/A	Plasmodium exported protein, unknown function
PF3D7_0831000	GEXP09	Plasmodium exported protein (PHISTb), unknown function
PF3D7_0831400	N/A	Plasmodium exported protein, unknown function
PF3D7_0831700	HSP70x	heat shock protein 70
PF3D7_0903300	N/A	conserved protein, unknown function
PF3D7_0903600	N/A	conserved protein, unknown function
PF3D7_0903700	N/A	alpha tubulin 1
PF3D7_0904800	RPA1	replication protein A1, small fragment
PF3D7_0905300	N/A	dynein heavy chain, putative
PF3D7_0905700	ATG3	autophagy-related protein 3, putative
PF3D7_0906400	N/A	dynein intermediate light chain, putative
PF3D7_0906910	N/A	tubulin-specific chaperone, putative
PF3D7_0908500	N/A	conserved Plasmodium protein, unknown function
PF3D7_0909000	N/A	conserved Plasmodium protein, unknown function
PF3D7_0909400	N/A	exoribonuclease, putative
PF3D7_0909700	N/A	FHA domain protein, putative
PF3D7_0909900	N/A	helicase SKI2W, putative
PF3D7_0910100	N/A	exportin-7, putative
PF3D7_0910900	N/A	DNA primase large subunit, putative
PF3D7_0911900	ICP	falstatin
PF3D7_0912000	N/A	conserved Plasmodium protein, unknown function
PF3D7_0912600	N/A	conserved Plasmodium protein, unknown function
PF3D7_0913300	N/A	conserved protein, unknown function
PF3D7_0913600	N/A	conserved Plasmodium protein, unknown function
PF3D7_0914300	N/A	met-10+ like protein, putative
PF3D7_0916400	N/A	conserved Plasmodium protein, unknown function
PF3D7_0917000	MOP	merozoite organizing protein
PF3D7_0917500	N/A	conserved protein, unknown function
PF3D7_0917600	PRP43	pre-mRNA-splicing factor ATP-dependent RNA helicase PRP43, putative
PF3D7_0918600	RECQ1	ATP-dependent DNA helicase Q1
PF3D7_0919500	MFS3	major facilitator superfamily domain-containing protein, putative
PF3D7_0920400	N/A	conserved Plasmodium protein, unknown function
PF3D7_0920800	IMPDH	inosine-5'-monophosphate dehydrogenase
PF3D7_0920900	PRP24	U4/U6 snRNA-associated-splicing factor, putative
PF3D7_0921200	N/A	conserved Plasmodium membrane protein, unknown function
PF3D7_0921600	N/A	tetratricopeptide repeat protein, putative
PF3D7_0922500	PGK	phosphoglycerate kinase
PF3D7_0922700	PRP18	pre-mRNA-splicing factor 18, putative
PF3D7_0923000	RPB3	DNA-directed RNA polymerase II subunit RPB3, putative
PF3D7_0923200	NOS	nitric oxide synthase, putative
PF3D7_0924100	N/A	conserved Plasmodium protein, unknown function
PF3D7_0925400	N/A	protein phosphatase-beta
PF3D7_0925700	HDAC1	histone deacetylase 1
PF3D7_0925800	UPF2	regulator of nonsense transcripts 2, putative
PF3D7_0927700	PPP4	serine/threonine protein phosphatase 4, putative
PF3D7_0928800	N/A	serine/threonine protein kinase, putative
PF3D7_0929000	TAF7	transcription initiation factor TFIID subunit 7, putative
PF3D7_0929400	RhopH2	high molecular weight rhoptry protein 2
PF3D7_0930400	N/A	zinc finger protein, putative
PF3D7_0931000	N/A	elongation factor Tu, putative
PF3D7_0931100	N/A	nucleolar protein Nop52, putative
PF3D7_0933900	N/A	conserved Plasmodium protein, unknown function
PF3D7_0934100	XPD	TFIIH basal transcription factor complex helicase XPD subunit
PF3D7_0934700	N/A	UBX domain-containing protein, putative
PF3D7_0935000	SNRPB2	U2 small nuclear ribonucleoprotein B'', putative
PF3D7_0935500	GEXP22	Plasmodium exported protein, unknown function
PF3D7_0935600	GIG	gametocytogenesis-implicated protein
PF3D7_0935800	CLAG9	cytoadherence linked asexual protein 9
PF3D7_0936000	REX2	ring-exported protein 2
PF3D7_0936800	N/A	Plasmodium exported protein (PHISTc), unknown function
PF3D7_1001000	CSA-L	chondroitin sulfate A ligand
PF3D7_1001500	ETRAMP10	early transcribed membrane protein 10.1
PF3D7_1001800	N/A	Plasmodium exported protein (PHISTc), unknown function
PF3D7_1002700	N/A	conserved Plasmodium protein, unknown function
PF3D7_1002800	N/A	DnaJ protein, putative
PF3D7_1003400	N/A	conserved Plasmodium protein, unknown function
PF3D7_1003700	N/A	MKT1 domain-containing protein, putative
PF3D7_1003800	EFTUD2	U5 small nuclear ribonucleoprotein component, putative
PF3D7_1004000	N/A	60S ribosomal protein L13, putative
PF3D7_1004600	N/A	conserved Plasmodium membrane protein, unknown function
PF3D7_1005100	UTP25	U3 small nucleolar RNA-associated protein 25, putative
PF3D7_1005600	N/A	DnaJ protein, putative
PF3D7_1006900	N/A	PPPDE peptidase, putative
PF3D7_1007400	N/A	conserved protein, unknown function
PF3D7_1007900	EIF3D	eukaryotic translation initiation factor 3 subunit D, putative
PF3D7_1009200	N/A	ribonuclease, putative
PF3D7_1009400	ZNF2	zinc finger protein, putative
PF3D7_1010600	eIF2beta	eukaryotic translation initiation factor 2 subunit beta
PF3D7_1011700	RAD23	DNA repair protein RAD23, putative
PF3D7_1012400	HGPRT	hypoxanthine-guanine phosphoribosyltransferase
PF3D7_1014400	MRK	MO15-related protein kinase
PF3D7_1015300	METAP1b	methionine aminopeptidase 1b, putative
PF3D7_1015500	N/A	nucleotidyltransferase, putative
PF3D7_1015600	HSP60	heat shock protein 60
PF3D7_1016400	FIKK10.1	serine/threonine protein kinase, FIKK family
PF3D7_1016500	N/A	Plasmodium exported protein (PHISTc), unknown function
PF3D7_1016700	N/A	Plasmodium exported protein (PHISTc), unknown function
PF3D7_1016900	ETRAMP10.3	early transcribed membrane protein 10.3
PF3D7_1017000	N/A	DNA polymerase delta catalytic subunit
PF3D7_1017300	GRASP	golgi re-assembly stacking protein 1
PF3D7_1017900	RPN5	26S proteasome regulatory subunit p55, putative
PF3D7_1019400	N/A	60S ribosomal protein L30e, putative
PF3D7_1020000	RBM34	RNA-binding protein 34, putative
PF3D7_1020300	N/A	cytoplasmic dynein intermediate chain, putative
PF3D7_1021200	N/A	conserved Plasmodium protein, unknown function
PF3D7_1021400	N/A	endomembrane protein 70, putative
PF3D7_1021500	ROK1	ATP-dependent RNA helicase ROK1, putative
PF3D7_1022000	N/A	RNA-binding protein UIS12, putative
PF3D7_1022300	ZIPCO	ZIP domain-containing protein, putative
PF3D7_1023800	N/A	conserved Plasmodium protein, unknown function
PF3D7_1024100	N/A	conserved Plasmodium protein, unknown function
PF3D7_1024800	EXP3	exported protein 3
PF3D7_1028200	N/A	RING zinc finger protein, putative
PF3D7_1028400	N/A	ribosome biogenesis protein RPF2, putative
PF3D7_1028500	N/A	partial CSTF domain-containing protein, putative
PF3D7_1028900	IMC1m	inner membrane complex protein 1m, putative
PF3D7_1029100	N/A	conserved Plasmodium protein, unknown function
PF3D7_1029900	N/A	ORC3 domain-containing protein, putative
PF3D7_1030300	N/A	conserved Plasmodium protein, unknown function
PF3D7_1031500	DDX3X	ATP-dependent DNA helicase DDX3X
PF3D7_1031700	I3	protein phosphatase inhibitor 3
PF3D7_1032500	Der1-2	DER1-like protein, putative
PF3D7_1033100	AdoMetDC/ODC	S-adenosylmethionine decarboxylase/ornithine decarboxylase
PF3D7_1034000	SLY1	Sec1 family protein, putative
PF3D7_1034300	TLAP2	thioredoxin-like associated protein 2, putative
PF3D7_1035200	N/A	S-antigen
PF3D7_1035300	GLURP	glutamate-rich protein GLURP
PF3D7_1035700	DBLMSP	duffy binding-like merozoite surface protein
PF3D7_1036700	PhLP2	phosducin-like protein 2, putative
PF3D7_1036800	ACT	acetyl-CoA transporter, putative
PF3D7_1037600	XPB	TFIIH basal transcription factor complex helicase XPB subunit, putative
PF3D7_1038000	N/A	antigen UB05
PF3D7_1038800	N/A	RESA-like protein with PHIST and DnaJ domains
PF3D7_1039700	MC-2TM	Pfmc-2TM Maurer's cleft two transmembrane protein
PF3D7_1101300	RIF	rifin
PF3D7_1101700	MC-2TM	Pfmc-2TM Maurer's cleft two transmembrane protein
PF3D7_1102800	ETRAMP11.2	early transcribed membrane protein 11.2
PF3D7_1103100	RPP1	60S acidic ribosomal protein P1, putative
PF3D7_1103600	ALP2a	actin-like protein, putative
PF3D7_1104000	N/A	phenylalanine--tRNA ligase beta subunit
PF3D7_1105500	CEN4	centrin-4
PF3D7_1106700	DNA2	DNA replication ATP-dependent helicase/nuclease DNA2, putative
PF3D7_1106800	pTKL	pseudo-tyrosine kinase-like protein
PF3D7_1107100	N/A	nucleic acid binding protein, putative
PF3D7_1107400	RAD51	DNA repair protein RAD51
PF3D7_1108000	N/A	IWS1-like protein, putative
PF3D7_1108100	N/A	conserved Plasmodium protein, unknown function
PF3D7_1110100	N/A	conserved Plasmodium protein, unknown function
PF3D7_1110300	N/A	G-patch domain-containing protein, putative
PF3D7_1111200	N/A	conserved protein, unknown function
PF3D7_1111300	BOS1	protein transport protein BOS1, putative
PF3D7_1112600	N/A	ATPase, putative
PF3D7_1113000	N/A	conserved Plasmodium protein, unknown function
PF3D7_1113100	PRL	protein tyrosine phosphatase
PF3D7_1113300	UGT	UDP-galactose transporter, putative
PF3D7_1113400	DSK2	ubiquitin domain-containing protein DSK2, putative
PF3D7_1113900	MAPK2	mitogen-activated protein kinase 2
PF3D7_1114100	ROM1	rhomboid protease ROM1
PF3D7_1114200	N/A	GTPase-activating protein, putative
PF3D7_1114500	N/A	conserved Plasmodium protein, unknown function
PF3D7_1116000	RON4	rhoptry neck protein 4
PF3D7_1116700	DPAP1	dipeptidyl aminopeptidase 1
PF3D7_1118300	N/A	insulinase, putative
PF3D7_1118500	NOP56	nucleolar protein 56, putative
PF3D7_1118600	MYST	histone acetyltransferase MYST
PF3D7_1119000	N/A	acyl-CoA-binding protein, putative
PF3D7_1119100	N/A	tRNA m(1)G methyltransferase, putative
PF3D7_1119400	N/A	ubiquitin-protein ligase, putative
PF3D7_1119500	N/A	AP-4 complex subunit mu, putative
PF3D7_1120500	N/A	tRNA nucleotidyltransferase, putative
PF3D7_1121600	EXP1	exported protein 1
PF3D7_1121700	GCN20	protein GCN20
PF3D7_1122800	CDPK6	calcium-dependent protein kinase 6
PF3D7_1123500	GP2	golgi protein 2
PF3D7_1123900	SNU13	13 kDa ribonucleoprotein-associated protein, putative
PF3D7_1124200	N/A	thioredoxin-like protein, putative
PF3D7_1124300	N/A	conserved protein, unknown function
PF3D7_1124800	RRS1	ribosome biogenesis regulatory protein, putative
PF3D7_1124900	RPL35	60S ribosomal protein L35, putative
PF3D7_1126200	RPS18	40S ribosomal protein S18, putative
PF3D7_1127000	N/A	protein phosphatase, putative
PF3D7_1127100	dUTPase	deoxyuridine 5'-triphosphate nucleotidohydrolase
PF3D7_1127900	N/A	conserved Plasmodium protein, unknown function
PF3D7_1128100	N/A	prefoldin subunit 5, putative
PF3D7_1128200	MBF1	multiprotein-bridging factor 1, putative
PF3D7_1128600	NOT2	CCR4-NOT transcription complex subunit 2, putative
PF3D7_1129200	RPN7	26S proteasome regulatory subunit RPN7, putative
PF3D7_1130000	PAGM	phosphoacetylglucosamine mutase, putative
PF3D7_1130200	PfP0	60S ribosomal protein P0
PF3D7_1130500	COG2	conserved oligomeric Golgi complex subunit 2, putative
PF3D7_1131500	N/A	conserved Plasmodium protein, unknown function
PF3D7_1132000	N/A	ubiquitin-like protein, putative
PF3D7_1132200	TCP1	T-complex protein 1 subunit alpha
PF3D7_1132300	N/A	nucleic acid binding protein, putative
PF3D7_1132400	N/A	conserved Plasmodium membrane protein, unknown function
PF3D7_1132600	PRP38A	pre-mRNA-splicing factor 38A, putative
PF3D7_1133100	N/A	conserved Plasmodium protein, unknown function
PF3D7_1133300	CDC50B	LEM3/CDC50 family protein, putative
PF3D7_1134600	N/A	zinc finger protein, putative
PF3D7_1135100	PPM8	protein phosphatase PPM8, putative
PF3D7_1135300	N/A	conserved Plasmodium membrane protein, unknown function
PF3D7_1136500	CK1	casein kinase 1
PF3D7_1136900	SUB2	subtilisin-like protease 2
PF3D7_1137800	SPELD	sporozoite surface protein essential for liver stage development, putative
PF3D7_1138600	N/A	beta-catenin-like protein 1, putative
PF3D7_1139100	N/A	RNA-binding protein, putative
PF3D7_1140600	N/A	conserved Plasmodium protein, unknown function
PF3D7_1140800	N/A	conserved Plasmodium protein, unknown function
PF3D7_1141400	PIGH	phosphatidylinositol N-acetylglucosaminyltransferase subunit H, putative
PF3D7_1143200	N/A	DnaJ protein, putative
PF3D7_1143400	N/A	translation initiation factor eIF-1A, putative
PF3D7_1143900	N/A	ATP-dependent (S)-NAD(P)H-hydrate dehydratase, putative
PF3D7_1144000	RPS21	40S ribosomal protein S21
PF3D7_1145000	N/A	conserved Plasmodium protein, unknown function
PF3D7_1145100	SEC21	coatomer subunit gamma, putative
PF3D7_1145300	CRIPT	cysteine-rich PDZ-binding protein, putative
PF3D7_1147500	FTB	protein farnesyltransferase subunit beta
PF3D7_1147600	N/A	conserved Plasmodium protein, unknown function
PF3D7_1148800	N/A	Plasmodium exported protein (hyp11), unknown function
PF3D7_1149400	N/A	Plasmodium exported protein, unknown function
PF3D7_1149600	N/A	DnaJ protein, putative
PF3D7_1201100	N/A	RESA-like protein with PHIST and DnaJ domains
PF3D7_1201500	N/A	GPN-loop GTPase, putative
PF3D7_1202300	N/A	dynein heavy chain, putative
PF3D7_1202700	N/A	AATF domain-containing protein, putative
PF3D7_1203000	ORC1	origin recognition complex subunit 1
PF3D7_1203100	N/A	conserved Plasmodium protein, unknown function
PF3D7_1203300	N/A	TBCC domain-containing protein, putative
PF3D7_1203900	UBC	ubiquitin-conjugating enzyme E2
PF3D7_1204100	N/A	conserved Plasmodium protein, unknown function
PF3D7_1205200	HADO	HAD domain ookinete protein, putative
PF3D7_1205400	N/A	kelch domain-containing protein, putative
PF3D7_1207400	N/A	conserved Plasmodium protein, unknown function
PF3D7_1209400	CIA1	cytosolic iron-sulfur protein assembly protein 1, putative
PF3D7_1209500	PDEalpha	cGMP-specific 3',5'-cyclic phosphodiesterase alpha
PF3D7_1210600	N/A	kelch protein, putative
PF3D7_1211000	N/A	kinesin-X3, putative
PF3D7_1211600	LSD1	lysine-specific histone demethylase 1, putative
PF3D7_1211800	PfpUB	polyubiquitin
PF3D7_1212400	N/A	tetratricopeptide repeat protein, putative
PF3D7_1212500	GAT	glycerol-3-phosphate 1-O-acyltransferase
PF3D7_1213200	MED18	mediator of RNA polymerase II transcription subunit 18, putative
PF3D7_1213400	N/A	kelch domain-containing protein, putative
PF3D7_1213800	PRS	proline--tRNA ligase
PF3D7_1213900	N/A	W2 domain-containing protein, putative
PF3D7_1215400	N/A	conserved Plasmodium protein, unknown function
PF3D7_1216300	SRP19	signal recognition particle subunit SRP19
PF3D7_1216400	N/A	conserved Plasmodium membrane protein, unknown function
PF3D7_1217400	N/A	conserved protein, unknown function
PF3D7_1217500	N/A	conserved Plasmodium protein, unknown function
PF3D7_1217900	N/A	PPPDE peptidase domain-containing protein, putative
PF3D7_1218200	N/A	symplekin domain-containing protein, putative
PF3D7_1218300	AP2-MU	AP-2 complex subunit mu
PF3D7_1218400	N/A	triose or hexose phosphate/phosphate translocator, putative
PF3D7_1218900	N/A	WD repeat-containing protein, putative
PF3D7_1220100	PRP17	pre-mRNA-processing factor 17, putative
PF3D7_1220400	DRN1	debranching enzyme-associated ribonuclease, putative
PF3D7_1220500	TSR3	ribosome biogenesis protein TSR3, putative
PF3D7_1221400	IMC1h	inner membrane complex protein 1h, putative
PF3D7_1221900	N/A	conserved Plasmodium membrane protein, unknown function
PF3D7_1222400	ApiAP2	AP2 domain transcription factor
PF3D7_1223000	N/A	conserved Plasmodium protein, unknown function
PF3D7_1223500	N/A	conserved Plasmodium protein, unknown function
PF3D7_1224100	N/A	conserved protein, unknown function
PF3D7_1224200	N/A	BRO1 domain-containing protein, putative
PF3D7_1224400	N/A	WD repeat-containing protein, putative
PF3D7_1224700	N/A	conserved Plasmodium protein, unknown function
PF3D7_1225200	N/A	DNA-binding protein, putative
PF3D7_1225500	N/A	small subunit rRNA processing factor, putative
PF3D7_1225600	N/A	conserved Plasmodium protein, unknown function
PF3D7_1225800	UBA1	ubiquitin-activating enzyme E1
PF3D7_1226000	N/A	conserved protein, unknown function
PF3D7_1226300	HAD2	haloacid dehalogenase-like hydrolase, putative
PF3D7_1226500	N/A	heptatricopeptide repeat and RAP domain-containing protein, putative
PF3D7_1226700	RRP9	U3 small nucleolar RNA-interacting protein 2, putative
PF3D7_1226800	ATX3	ataxin-3, putative
PF3D7_1226900	PV2	parasitophorous vacuolar protein 2
PF3D7_1227400	N/A	conserved Plasmodium protein, unknown function
PF3D7_1228100	LRR13	leucine-rich repeat protein
PF3D7_1228300	NEK1	NIMA related kinase 1
PF3D7_1229300	PIC1	PhIL1-interacting candidate PIC1
PF3D7_1229500	CCT3	T-complex protein 1 subunit gamma
PF3D7_1230000	N/A	TBC domain-containing protein, putative
PF3D7_1230100	TLAP1	thioredoxin-like associated protein 1, putative
PF3D7_1231100	RAB2	ras-related protein Rab-2
PF3D7_1231400	ICM1	membrane protein ICM1
PF3D7_1232300	N/A	cytochrome b5, putative
PF3D7_1232400	N/A	CWC16 domain-containing protein, putative
PF3D7_1232500	N/A	CG2-related protein, putative
PF3D7_1233100	N/A	conserved protein, unknown function
PF3D7_1233800	N/A	conserved protein, unknown function
PF3D7_1234500	N/A	conserved Plasmodium protein, unknown function
PF3D7_1234900	N/A	CHCH domain-containing protein, putative
PF3D7_1235200	VP2	V-type K+-independent H+-translocating inorganic pyrophosphatase
PF3D7_1235500	MT-A70.2	N6-adenosine-methyltransferase, putative
PF3D7_1235900	XAB2	pre-mRNA-splicing factor SYF1, putative
PF3D7_1236100	CARP	clustered-asparagine-rich protein
PF3D7_1236800	ICMT	protein-S-isoprenylcysteine O-methyltransferase
PF3D7_1237000	UBA2	SUMO-activating enzyme subunit 2
PF3D7_1237200	N/A	conserved Plasmodium protein, unknown function
PF3D7_1238300	CWC22	pre-mRNA-splicing factor CWC22, putative
PF3D7_1238700	N/A	BTB/POZ domain-containing protein, putative
PF3D7_1238800	ACS11	acyl-CoA synthetase
PF3D7_1238900	PK2	protein kinase 2
PF3D7_1239700	FTSH1	ATP-dependent zinc metalloprotease FTSH 1
PF3D7_1241400	N/A	RNA-binding protein, putative
PF3D7_1241900	N/A	tetratricopeptide repeat protein, putative
PF3D7_1242300	N/A	conserved Plasmodium membrane protein, unknown function
PF3D7_1242700	N/A	40S ribosomal protein S17, putative
PF3D7_1243100	N/A	zinc finger protein, putative
PF3D7_1243400	N/A	conserved Plasmodium protein, unknown function
PF3D7_1243500	SNF7	vacuolar-sorting protein SNF7, putative
PF3D7_1243600	N/A	translation initiation factor SUI1, putative
PF3D7_1244100	N/A	N-alpha-acetyltransferase 15, NatA auxiliary subunit, putative
PF3D7_1244200	TFB2	RNA polymerase II transcription factor B subunit 2, putative
PF3D7_1244700	N/A	conserved protein, unknown function
PF3D7_1245500	N/A	conserved Plasmodium protein, unknown function
PF3D7_1245800	EpsL	epsin-like protein, putative
PF3D7_1246400	MTIP	myosin A-tail interacting protein
PF3D7_1246600	BUD13	pre-mRNA-splicing factor CWC26, putative
PF3D7_1247400	FKBP35	peptidyl-prolyl cis-trans isomerase FKBP35
PF3D7_1248200	RBM22	pre-mRNA-splicing factor RBM22, putative
PF3D7_1248400	N/A	conserved Plasmodium protein, unknown function
PF3D7_1248500	N/A	bax inhibitor 1, putative
PF3D7_1249600	LRR12	leucine-rich repeat protein
PF3D7_1250800	N/A	DNA repair protein rhp16, putative
PF3D7_1251100	N/A	conserved Plasmodium protein, unknown function
PF3D7_1251500	DRS1	ATP-dependent RNA helicase DRS1, putative
PF3D7_1251600	N/A	conserved Plasmodium protein, unknown function
PF3D7_1251800	N/A	conserved Plasmodium protein, unknown function
PF3D7_1302700	N/A	ATP-dependent RNA helicase DHR1, putative
PF3D7_1302800	N/A	40S ribosomal protein S7, putative
PF3D7_1304900	RPB11	DNA-directed RNA polymerase II subunit RPB11, putative
PF3D7_1305600	S2P	site-2 protease S2P, putative
PF3D7_1305900	N/A	conserved Plasmodium protein, unknown function
PF3D7_1306300	N/A	SAM dependent methyltransferase, putative
PF3D7_1307100	UTP6	U3 small nucleolar RNA-associated protein 6, putative
PF3D7_1307800	CEP170	centrosomal protein CEP170, putative
PF3D7_1308100	N/A	CCAAT-binding transcription factor, putative
PF3D7_1308300	RPS27	40S ribosomal protein S27
PF3D7_1309100	N/A	60S ribosomal protein L24, putative
PF3D7_1309400	N/A	HORMA domain protein, putative
PF3D7_1309700	VPS18	vacuolar protein sorting-associated protein 18, putative
PF3D7_1313000	NEDD8	ubiquitin-like protein Nedd8
PF3D7_1313500	N/A	conserved Plasmodium membrane protein, unknown function
PF3D7_1313600	N/A	Clu domain-containing protein, putative
PF3D7_1313700	N/A	Maf-like protein, putative
PF3D7_1314200	TERT	telomerase reverse transcriptase
PF3D7_1316900	N/A	conserved protein, unknown function
PF3D7_1317000	USP39	U4/U6.U5 tri-snRNP-associated protein 2, putative
PF3D7_1317900	NOC4	nucleolar complex protein 4, putative
PF3D7_1318000	N/A	conserved protein, unknown function
PF3D7_1319000	N/A	conserved Plasmodium protein, unknown function
PF3D7_1319300	TRM1	tRNA (guanine(26)-N(2))-dimethyltransferase, putative
PF3D7_1319400	N/A	conserved protein, unknown function
PF3D7_1319600	N/A	ACDC domain-containing protein, putative
PF3D7_1319900	N/A	conserved Plasmodium protein, unknown function
PF3D7_1320200	N/A	TBC domain protein, putative
PF3D7_1320500	SNAP23	SNARE protein, putative
PF3D7_1320600	RAB11a	ras-related protein Rab-11A
PF3D7_1320900	N/A	RNA-binding protein, putative
PF3D7_1321100	N/A	protein kinase domain-containing protein, putative
PF3D7_1321200	N/A	zinc finger protein, putative
PF3D7_1321600	PDEgamma	cGMP-specific 3',5'-cyclic phosphodiesterase gamma, putative
PF3D7_1322100	SET2	histone-lysine N-methyltransferase SET2
PF3D7_1322600	N/A	conserved Plasmodium protein, unknown function
PF3D7_1323300	N/A	N-acetyltransferase, GNAT family, putative
PF3D7_1324300	N/A	conserved Plasmodium membrane protein, unknown function
PF3D7_1324500	N/A	DEAD box helicase, putative
PF3D7_1324600	N/A	conserved Plasmodium protein, unknown function
PF3D7_1324900	LDH	L-lactate dehydrogenase
PF3D7_1327500	N/A	conserved protein, unknown function
PF3D7_1327600	NMNAT	nicotinamide/nicotinic acid mononucleotide adenylyltransferase
PF3D7_1330000	N/A	PITH domain-containing protein, putative
PF3D7_1330400	N/A	ER lumen protein retaining receptor 1, putative
PF3D7_1330500	N/A	CTLH domain-containing protein, putative
PF3D7_1331200	N/A	conserved Plasmodium protein, unknown function
PF3D7_1331300	SEC11	signal peptidase complex catalytic subunit SEC11
PF3D7_1331500	N/A	conserved Plasmodium protein, unknown function
PF3D7_1332000	SYN5	syntaxin, Qa-SNARE family
PF3D7_1332400	N/A	nucleotidyltransferase, putative
PF3D7_1332600	APN1	DNA-(apurinic or apyrimidinic site) lyase 1
PF3D7_1332800	N/A	eukaryotic translation initiation factor 6, putative
PF3D7_1332900	cyto-IRS	isoleucine--tRNA ligase, putative
PF3D7_1333100	N/A	conserved Plasmodium protein, unknown function
PF3D7_1333200	UBA1	ubiquitin-activating enzyme
PF3D7_1333800	N/A	Voldacs domain-containing protein, putative
PF3D7_1334000	N/A	RING zinc finger protein, putative
PF3D7_1334300	MSRP5	MSP7-like protein
PF3D7_1334500	MSRP6	MSP7-like protein
PF3D7_1335000	MSRP1	MSP7-like protein
PF3D7_1335700	COG3	conserved oligomeric Golgi complex subunit 3, putative
PF3D7_1335800	N/A	conserved Plasmodium protein, unknown function
PF3D7_1337100	PK6	protein kinase 6
PF3D7_1337800	CDPK5	calcium-dependent protein kinase 5
PF3D7_1338000	N/A	LMBR1 domain-containing protein, putative
PF3D7_1338100	RPN3	26S proteasome regulatory subunit RPN3, putative
PF3D7_1338300	EF-1gamma	elongation factor 1-gamma, putative
PF3D7_1339900	ABCB5	ABC transporter B family member 5, putative
PF3D7_1340200	N/A	conserved Plasmodium protein, unknown function
PF3D7_1340700	RAB11b	ras-related protein Rab-11B
PF3D7_1341200	N/A	60S ribosomal protein L18, putative
PF3D7_1341500	ISC1	inner membrane complex suture component, putative
PF3D7_1341800	IMC1k	inner membrane complex protein 1k, putative
PF3D7_1342400	CK2beta2	casein kinase II beta chain
PF3D7_1343400	RAD5	DNA repair protein RAD5, putative
PF3D7_1344200	GRP170	endoplasmic reticulum chaperone GRP170
PF3D7_1344300	N/A	zinc finger protein, putative
PF3D7_1347300	N/A	conserved Plasmodium membrane protein, unknown function
PF3D7_1347500	ALBA4	DNA/RNA-binding protein Alba 4
PF3D7_1347700	ECT	ethanolamine-phosphate cytidylyltransferase
PF3D7_1348400	N/A	conserved Plasmodium membrane protein, unknown function
PF3D7_1349800	N/A	GPN-loop GTPase, putative
PF3D7_1350900	ApiAP2	AP2 domain transcription factor AP2-O4, putative
PF3D7_1351900	N/A	conserved protein, unknown function
PF3D7_1352000	N/A	GTP-binding protein, putative
PF3D7_1355700	NIF3	NLI interacting factor-like phosphatase, putative
PF3D7_1356400	N/A	phosphatase 2A regulatory subunit-related protein, putative
PF3D7_1356900	PK5	protein kinase 5
PF3D7_1357700	UTP21	U3 small nucleolar RNA-associated protein 21, putative
PF3D7_1358100	N/A	Sas10 domain-containing protein, putative
PF3D7_1358200	N/A	conserved Plasmodium protein, unknown function
PF3D7_1358400	N/A	conserved Plasmodium protein, unknown function
PF3D7_1358500	N/A	zinc finger protein, putative
PF3D7_1358700	YOP1L	YOP1-like protein, putative
PF3D7_1360100	RRM1	RNA-binding protein, putative
PF3D7_1361400	ADF2	actin-depolymerizing factor 2
PF3D7_1361800	GAC	glideosome-associated connector
PF3D7_1361900	PCNA1	proliferating cell nuclear antigen 1
PF3D7_1362200	RUVB3	RuvB-like helicase 3
PF3D7_1362400	Pcalp	calpain
PF3D7_1362500	EXO	3'-5' exonuclease, putative
PF3D7_1363100	N/A	conserved Plasmodium protein, unknown function
PF3D7_1363400	DOA1	polyubiquitin binding protein, putative
PF3D7_1363500	CCR4-2	CCR4 domain-containing protein 2, putative
PF3D7_1364300	PRP16	pre-mRNA-splicing factor ATP-dependent RNA helicase PRP16
PF3D7_1366100	DIP13	DIP13 homolog, putative
PF3D7_1366300	N/A	conserved Plasmodium protein, unknown function
PF3D7_1366400	RHOP148	rhoptry protein RHOP148
PF3D7_1366500	NDK	nucleoside diphosphate kinase
PF3D7_1367400	N/A	conserved Plasmodium protein, unknown function
[truncated: 149 more rows]

## Sheet: Union1
PhosphoProtein	Name	Product
PF3D7_0110700	CAF1C	chromatin assembly factor 1 subunit C, putative
PF3D7_0110800	N/A	transcription initiation factor TFIIB, putative
PF3D7_0113200	N/A	Plasmodium exported protein, unknown function
PF3D7_0204700	HT1	hexose transporter
PF3D7_0209100	PATPL1	patatin-like phospholipase 1
PF3D7_0209600	N/A	transporter, putative
PF3D7_0210200	N/A	conserved Plasmodium protein, unknown function
PF3D7_0212900	ATEL1	arginyl-tRNA--protein transferase
PF3D7_0213700	N/A	conserved protein, unknown function
PF3D7_0215400	N/A	conserved Plasmodium protein, unknown function
PF3D7_0219600	RFC1	replication factor C subunit 1
PF3D7_0307100	RPS12	40S ribosomal protein S12, putative
PF3D7_0312100	N/A	E3 ubiquitin-protein ligase
PF3D7_0317400	N/A	DNA replication complex GINS protein, putative
PF3D7_0322400	N/A	regulator of initiation factor 2 (eIF2)
PF3D7_0403600	N/A	conserved Plasmodium protein, unknown function
PF3D7_0405400	PRPF8	pre-mRNA-processing-splicing factor 8, putative
PF3D7_0408200	N/A	conserved Plasmodium protein, unknown function
PF3D7_0409800	N/A	zinc finger protein, putative
PF3D7_0410300	PPM1	protein phosphatase PPM1, putative
PF3D7_0411900	N/A	DNA polymerase alpha catalytic subunit A
PF3D7_0505900	MED11	mediator of RNA polymerase II transcription subunit 11, putative
PF3D7_0508100	SET9	SET domain protein, putative
PF3D7_0508500	ND6	ND6 protein, putative
PF3D7_0509100	SMC4	structural maintenance of chromosomes protein 4, putative
PF3D7_0510200	CYP87	peptidyl-prolyl cis-trans isomerase
PF3D7_0512000	PFD6	prefoldin subunit 6
PF3D7_0513800	RAB1a	ras-related protein Rab-1A
PF3D7_0515000	CWC2	pre-mRNA-splicing factor CWC2, putative
PF3D7_0515400	N/A	conserved protein, unknown function
PF3D7_0517400	FACT-L	FACT complex subunit SPT16, putative
PF3D7_0519600	N/A	zinc finger protein, putative
PF3D7_0521700	DDX1	ATP-dependent RNA helicase DDX1, putative
PF3D7_0526200	ARFGAP2	ADP-ribosylation factor GTPase-activating protein 2
PF3D7_0528100	N/A	AP-1/2 complex subunit beta, putative
PF3D7_0602100	MTR4	ATP-dependent RNA helicase MTR4
PF3D7_0617200	N/A	BFR1 domain-containing protein, putative
PF3D7_0618700	N/A	trafficking protein particle complex subunit 6A, putative
PF3D7_0624000	HK	hexokinase
PF3D7_0629700	SET1	SET domain protein, putative
PF3D7_0704000	N/A	conserved Plasmodium membrane protein, unknown function
PF3D7_0705100	N/A	conserved Plasmodium protein, unknown function
PF3D7_0706500	N/A	conserved Plasmodium protein, unknown function
PF3D7_0711400	SAP18	histone deacetylase complex subunit SAP18, putative
PF3D7_0714500	N/A	transcription elongation factor s-II, putative
PF3D7_0714600	N/A	conserved protein, unknown function
PF3D7_0717400	N/A	queuine tRNA-ribosyltransferase, putative
PF3D7_0723800	N/A	conserved Plasmodium protein, unknown function
PF3D7_0729500	MT-A70	N6-adenosine-methyltransferase MT-A70
PF3D7_0730200	N/A	AP-4 complex subunit beta, putative
PF3D7_0806000	N/A	AAA family ATPase, putative
PF3D7_0807100	PSH3	DNA helicase PSH3
PF3D7_0808300	N/A	ubiquitin regulatory protein, putative
PF3D7_0812800	N/A	zinc finger protein, putative
PF3D7_0813000	KIC7	protein KIC7
PF3D7_0814400	N/A	phospholipase DDHD1, putative
PF3D7_0817600	N/A	conserved protein, unknown function
PF3D7_0825000	N/A	conserved Plasmodium protein, unknown function
PF3D7_0904800	RPA1	replication protein A1, small fragment
PF3D7_0907200	N/A	GTPase-activating protein, putative
PF3D7_0910100	N/A	exportin-7, putative
PF3D7_0912500	N/A	SAP domain-containing protein, putative
PF3D7_0912600	N/A	conserved Plasmodium protein, unknown function
PF3D7_0916400	N/A	conserved Plasmodium protein, unknown function
PF3D7_0916700	HoMu	RNA-binding protein musashi, putative
PF3D7_0917600	PRP43	pre-mRNA-splicing factor ATP-dependent RNA helicase PRP43, putative
PF3D7_0920700	N/A	CRAL/TRIO domain-containing protein, putative
PF3D7_0920900	PRP24	U4/U6 snRNA-associated-splicing factor, putative
PF3D7_0924400	N/A	conserved Plasmodium protein, unknown function
PF3D7_0931000	N/A	elongation factor Tu, putative
PF3D7_1002900	N/A	conserved Plasmodium protein, unknown function
PF3D7_1006800	GBP2	G-strand-binding protein 2
PF3D7_1007900	EIF3D	eukaryotic translation initiation factor 3 subunit D, putative
PF3D7_1017600	N/A	conserved Plasmodium protein, unknown function
PF3D7_1018600	N/A	tRNA wybutosine-synthesizing protein, putative
PF3D7_1019600	N/A	conserved Plasmodium protein, unknown function
PF3D7_1019700	N/A	conserved Plasmodium protein, unknown function
PF3D7_1022400	SRSF4	serine/arginine-rich splicing factor 4
PF3D7_1027800	RPL3	60S ribosomal protein L3
PF3D7_1029400	CDC50C	LEM3/CDC50 family protein, putative
PF3D7_1031400	OTU	OTU-like cysteine protease
PF3D7_1031800	N/A	conserved protein, unknown function
PF3D7_1034000	SLY1	Sec1 family protein, putative
PF3D7_1037300	AAC1	ADP,ATP carrier protein 1
PF3D7_1102500	GEXP02	gametocyte exported protein 2
PF3D7_1110400	N/A	RNA-binding protein, putative
PF3D7_1110900	N/A	ES2 protein, putative
PF3D7_1111600	N/A	endonuclease/exonuclease/phosphatase family protein, putative
PF3D7_1121300	TKL2	tyrosine kinase-like protein
PF3D7_1123900	SNU13	13 kDa ribonucleoprotein-associated protein, putative
PF3D7_1124900	RPL35	60S ribosomal protein L35, putative
PF3D7_1126700	ATG23	conserved Plasmodium protein, unknown function
PF3D7_1129400	NSUN3	RNA cytosine C(5)-methyltransferase, putative
PF3D7_1138400	GCalpha	guanylyl cyclase alpha
PF3D7_1142500	RPL28	60S ribosomal protein L28
PF3D7_1142900	N/A	conserved Plasmodium protein, unknown function
PF3D7_1143100	AP2-O	AP2 domain transcription factor AP2-O
PF3D7_1146200	N/A	conserved Plasmodium protein, unknown function
PF3D7_1204300	EIF5A	eukaryotic translation initiation factor 5A
PF3D7_1205500	N/A	zinc finger protein, putative
PF3D7_1205600	N/A	tetratricopeptide repeat protein, putative
PF3D7_1206300	N/A	conserved Plasmodium protein, unknown function
PF3D7_1211900	ATP4	non-SERCA-type Ca2+ -transporting P-ATPase
PF3D7_1220400	DRN1	debranching enzyme-associated ribonuclease, putative
PF3D7_1220900	HP1	heterochromatin protein 1
PF3D7_1230800	WTAP	pre-mRNA-splicing regulator WTAP, putative
PF3D7_1238300	CWC22	pre-mRNA-splicing factor CWC22, putative
PF3D7_1239200	ApiAP2	AP2 domain transcription factor, putative
PF3D7_1249300	PPM4	protein phosphatase PPM4, putative
PF3D7_1302100	G27/25	gamete antigen 27/25
PF3D7_1304500	N/A	small heat shock protein, putative
PF3D7_1305900	N/A	conserved Plasmodium protein, unknown function
PF3D7_1312900	EIF4G	eukaryotic translation initation factor 4 gamma
PF3D7_1316900	N/A	conserved protein, unknown function
PF3D7_1343000	PMT	phosphoethanolamine N-methyltransferase
PF3D7_1343400	RAD5	DNA repair protein RAD5, putative
PF3D7_1348600	N/A	conserved Plasmodium protein, unknown function
PF3D7_1349300	TKL3	tyrosine kinase-like protein
PF3D7_1353400	N/A	Ran-binding protein, putative
PF3D7_1354900	N/A	conserved Plasmodium protein, unknown function
PF3D7_1366400	RHOP148	rhoptry protein RHOP148
PF3D7_1407100	NOP1	rRNA 2'-O-methyltransferase fibrillarin, putative
PF3D7_1409400	N/A	conserved protein, unknown function
PF3D7_1418200	N/A	conserved Plasmodium protein, unknown function
PF3D7_1427600	MIT3	CorA-like Mg2+ transporter protein, putative
PF3D7_1432900	N/A	SF-assemblin, putative
PF3D7_1435500	CLC	clathrin light chain, putative
PF3D7_1438100	SEC62	translocation protein SEC62, putative
PF3D7_1440000	N/A	conserved Plasmodium protein, unknown function
PF3D7_1440800	MFS6	major facilitator superfamily domain-containing protein, putative
PF3D7_1448600	VTI1	SNARE protein, putative
PF3D7_1461800	N/A	conserved Plasmodium protein, unknown function
PF3D7_1464000	N/A	YL1 nuclear protein, putative
PF3D7_1467600	N/A	conserved Plasmodium protein, unknown function
PF3D7_1468900	N/A	zinc finger protein, putative
PF3D7_1474000	N/A	conserved Plasmodium protein, unknown function
PF3D7_0208200	KRR1	KRR1 small subunit processome component, putative
PF3D7_0407800	CINCH	protein CINCH
PF3D7_0506800	TCF25	transcription factor 25, putative
PF3D7_0614300	MFR1	major facilitator superfamily-related transporter, putative
PF3D7_0708400	HSP90	heat shock protein 90
PF3D7_0715800	DMT1	drug/metabolite transporter DMT1, putative
PF3D7_1002400	TRA2B	transformer-2 protein homolog beta, putative
PF3D7_1025900	N/A	conserved protein, unknown function
PF3D7_1030000	SPT4	transcription elongation factor SPT4, putative
PF3D7_1108400	CK2alpha	casein kinase 2, alpha subunit
PF3D7_1114100	ROM1	rhomboid protease ROM1
PF3D7_1114700	CLK3	cyclin-dependent-like kinase CLK3
PF3D7_1126200	RPS18	40S ribosomal protein S18, putative
PF3D7_1129900	MFR5	major facilitator superfamily-related transporter, putative
PF3D7_1132200	TCP1	T-complex protein 1 subunit alpha
PF3D7_1133300	CDC50B	LEM3/CDC50 family protein, putative
PF3D7_1149000	Pf332	antigen 332, DBL-like protein
PF3D7_1209200	LSM7	U6 snRNA-associated Sm-like protein LSm7, putative
PF3D7_1221000	SET10	histone-lysine N-methyltransferase, H3 lysine-4 specific
PF3D7_1304200	MIT2	CorA-like Mg2+ transporter protein, putative
PF3D7_1304900	RPB11	DNA-directed RNA polymerase II subunit RPB11, putative
PF3D7_1306800	N/A	RED-like protein, putative
PF3D7_1328300	N/A	conserved protein, unknown function
PF3D7_1340300	N/A	nucleolar complex protein 2, putative
PF3D7_1347200	NT1	nucleoside transporter 1
PF3D7_1429000	N/A	protein archease, putative
PF3D7_1465900	N/A	40S ribosomal protein S3
PF3D7_1473200	N/A	DnaJ protein, putative
PF3D7_1473700	NUP116	nucleoporin NUP116/NSP116, putative
PF3D7_1474900	CITH	trailer hitch homolog, putative
PF3D7_1476800	N/A	lysophospholipase, putative
PF3D7_0220000	LSA3	liver stage antigen 3
PF3D7_0526800	N/A	conserved Plasmodium protein, unknown function
PF3D7_0528400	DHHC7	palmitoyltransferase DHHC7
PF3D7_0603400	TEX1	trophozoite exported protein 1
PF3D7_0607000	N/A	translation initiation factor IF-2, putative
PF3D7_0617800	H2A	histone H2A
PF3D7_0702400	SEMP1	small exported membrane protein 1
PF3D7_0714000	H2B.Z	histone H2B variant
PF3D7_0821400	N/A	conserved Plasmodium protein, unknown function
PF3D7_0824400	NT2	nucleoside transporter 2
PF3D7_0825300	N/A	SAYSvFN domain-containing protein, putative
PF3D7_1020000	RBM34	RNA-binding protein 34, putative
PF3D7_1021200	N/A	conserved Plasmodium protein, unknown function
PF3D7_1021900	N/A	PHAX domain-containing protein, putative
PF3D7_1026800	RPS2	40S ribosomal protein S2
PF3D7_1104100	SYN13	syntaxin, Qa-SNARE family
PF3D7_1109400	ENP1	essential nuclear protein 1, putative
PF3D7_1243100	N/A	zinc finger protein, putative
PF3D7_1417300	ATG4	cysteine protease ATG4, putative
PF3D7_1446600	CEN2	centrin-2
PF3D7_1453000	N/A	conserved Plasmodium protein, unknown function
PF3D7_1468700	eIF4A	eukaryotic initiation factor 4A
PF3D7_0218700	PRP45	pre-mRNA-processing protein 45, putative
PF3D7_0322000	CYP19A	peptidyl-prolyl cis-trans isomerase
PF3D7_0516400	PhLP1	phosducin-like protein 1, putative
PF3D7_0715200	N/A	conserved Plasmodium protein, unknown function
PF3D7_0801800	N/A	mannose-6-phosphate isomerase, putative
PF3D7_0813900	RPS16	40S ribosomal protein S16, putative
PF3D7_0906600	N/A	zinc finger protein, putative
PF3D7_0925700	HDAC1	histone deacetylase 1
PF3D7_1114900	N/A	filamin domain-containing protein, putative
PF3D7_1140600	N/A	conserved Plasmodium protein, unknown function
PF3D7_1208400	N/A	amino acid transporter, putative
PF3D7_1307900	N/A	tripartite motif protein, putative
PF3D7_1313600	N/A	Clu domain-containing protein, putative
PF3D7_1327500	N/A	conserved protein, unknown function
PF3D7_1366300	N/A	conserved Plasmodium protein, unknown function
PF3D7_1436200	BCP1	basal complex protein BCP1
PF3D7_1461400	N/A	MORN repeat protein, putative
PF3D7_0205900	RPN1	26S proteasome regulatory subunit RPN1, putative
PF3D7_0519500	CCR4-1	CCR4 domain-containing protein 1, putative
PF3D7_0522900	N/A	zinc finger protein, putative
PF3D7_0903200	RAB7	ras-related protein RAB7
PF3D7_1210600	N/A	kelch protein, putative
PF3D7_1219600	ATP2	phospholipid-transporting ATPase 2
PF3D7_1311900	vapA	V-type proton ATPase catalytic subunit A
PF3D7_1409800	CELF2	CUGBP Elav-like family member 2, putative
PF3D7_1441200	N/A	60S ribosomal protein L1, putative
PF3D7_0107800	MRE11	double-strand break repair protein MRE11
PF3D7_0109000	PHIL1	photosensitized INA-labeled protein PHIL1
PF3D7_0202000	KAHRP	knob-associated histidine-rich protein
PF3D7_0207100	N/A	conserved Plasmodium protein, unknown function
PF3D7_0209800	UAP56	ATP-dependent RNA helicase UAP56
PF3D7_0212100	N/A	conserved Plasmodium protein, unknown function
PF3D7_0212500	N/A	conserved Plasmodium protein, unknown function
PF3D7_0214300	N/A	conserved Plasmodium protein, unknown function
PF3D7_0218500	SNRPD2	small nuclear ribonucleoprotein Sm D2, putative
PF3D7_0306900	N/A	40S ribosomal protein S23, putative
PF3D7_0311300	N/A	phosphatidylinositol 3- and 4-kinase, putative
PF3D7_0315600	N/A	zinc finger protein, putative
PF3D7_0416400	HAT1	histone acetyltransferase, putative
PF3D7_0418600	N/A	regulator of chromosome condensation, putative
PF3D7_0501400	FIRA	interspersed repeat antigen
PF3D7_0505500	MSH6	DNA mismatch repair protein MSH6, putative
PF3D7_0508600	N/A	conserved protein, unknown function
PF3D7_0513600	N/A	deoxyribodipyrimidine photo-lyase, putative
PF3D7_0516200	RPS11	40S ribosomal protein S11
PF3D7_0615800	COG4	conserved oligomeric Golgi complex subunit 4, putative
PF3D7_0618000	N/A	conserved Plasmodium membrane protein, unknown function
PF3D7_0623100	NAB2	nuclear polyadenylated RNA-binding protein NAB2, putative
PF3D7_0626800	PyrK	pyruvate kinase
PF3D7_0707200	N/A	conserved Plasmodium protein, unknown function
PF3D7_0708500	N/A	heat shock protein 86 family protein
PF3D7_0709700	PARE	prodrug activation and resistance esterase
PF3D7_0722600	UTP7	U3 small nucleolar RNA-associated protein 7, putative
PF3D7_0726600	N/A	conserved Plasmodium protein, unknown function
PF3D7_0730900	PTP4	EMP1-trafficking protein
PF3D7_0801700	SENP2	sentrin-specific protease 2, putative
PF3D7_0803100	UTP14	U3 small nucleolar RNA-associated protein 14, putative
PF3D7_0804000	N/A	cactin homolog, putative
PF3D7_0810300	PPM5	protein phosphatase PPM5, putative
PF3D7_0817900	HMGB2	high mobility group protein B2
PF3D7_0818200	14-3-3I	14-3-3 protein
PF3D7_0818900	HSP70	heat shock protein 70
PF3D7_0823100	N/A	RWD domain-containing protein, putative
PF3D7_0912000	N/A	conserved Plasmodium protein, unknown function
PF3D7_0913200	EF-1beta	elongation factor 1-beta
PF3D7_0913600	N/A	conserved Plasmodium protein, unknown function
PF3D7_0914500	N/A	conserved Plasmodium protein, unknown function
PF3D7_0914700	MFR4	major facilitator superfamily-related transporter, putative
PF3D7_0915400	PFK9	ATP-dependent 6-phosphofructokinase
PF3D7_0917000	MOP	merozoite organizing protein
PF3D7_1006200	ALBA3	DNA/RNA-binding protein Alba 3
PF3D7_1007700	AP2-I	AP2 domain transcription factor AP2-I
PF3D7_1017500	ELC	myosin essential light chain ELC
PF3D7_1019900	ATG8	autophagy-related protein 8
PF3D7_1031300	N/A	SAE2 domain-containing protein, putative
PF3D7_1032700	N/A	conserved Plasmodium protein, unknown function
PF3D7_1103100	RPP1	60S acidic ribosomal protein P1, putative
PF3D7_1105100	H2B	histone H2B
PF3D7_1107300	PAIP1	polyadenylate-binding protein-interacting protein 1, putative
PF3D7_1113100	PRL	protein tyrosine phosphatase
PF3D7_1124600	EK	ethanolamine kinase
PF3D7_1125800	N/A	kelch domain-containing protein, putative
PF3D7_1127800	N/A	TFIIS central domain-containing protein, putative
PF3D7_1129300	N/A	conserved Plasmodium protein, unknown function
PF3D7_1136800	N/A	DnaJ protein, putative
PF3D7_1139300	AP2-G5	AP2 domain transcription factor AP2-G5
PF3D7_1140200	N/A	conserved Plasmodium protein, unknown function
PF3D7_1140400	N/A	conserved Plasmodium protein, unknown function
PF3D7_1146600	ORP1	oocyst rupture protein 1, putative
PF3D7_1201900	N/A	conserved protein, unknown function
PF3D7_1207000	N/A	conserved Plasmodium protein, unknown function
PF3D7_1211600	LSD1	lysine-specific histone demethylase 1, putative
PF3D7_1212700	EIF3A	eukaryotic translation initiation factor 3 subunit A, putative
PF3D7_1222400	ApiAP2	AP2 domain transcription factor
PF3D7_1223700	VIT	vacuolar iron transporter
PF3D7_1226300	HAD2	haloacid dehalogenase-like hydrolase, putative
PF3D7_1227700	KIC2	protein KIC2
PF3D7_1228300	NEK1	NIMA related kinase 1
PF3D7_1243700	N/A	ubiquitin-conjugating enzyme E2, putative
PF3D7_1247400	FKBP35	peptidyl-prolyl cis-trans isomerase FKBP35
PF3D7_1302500	N/A	AAA domain-containing protein, putative
PF3D7_1308200	cpsSII	carbamoyl phosphate synthetase
PF3D7_1315500	N/A	conserved protein, unknown function
PF3D7_1325400	N/A	CRWN-like protein, putative
PF3D7_1328500	N/A	alpha/beta-hydrolase, putative
PF3D7_1349600	N/A	conserved Plasmodium protein, unknown function
PF3D7_1356100	N/A	conserved Plasmodium protein, unknown function
PF3D7_1405100	N/A	GTPase-activating protein, putative
PF3D7_1410200	CTPS	CTP synthase
PF3D7_1416900	N/A	prefoldin subunit 2, putative
PF3D7_1438400	MCA2	metacaspase-2
PF3D7_1441100	N/A	conserved Plasmodium protein, unknown function
PF3D7_1449600	N/A	conserved protein, unknown function
PF3D7_1451500	N/A	pre-mRNA-splicing factor CWF18, putative
PF3D7_1452400	N/A	conserved Plasmodium protein, unknown function
PF3D7_1454000	N/A	RNA-binding protein, putative
PF3D7_1457500	VPS4	vacuolar protein sorting-associated protein 4
PF3D7_1473400	N/A	conserved protein, unknown function
PF3D7_0110500	BDP3	bromodomain protein 3, putative
PF3D7_0203100	N/A	protein kinase, putative
PF3D7_0400400	VAR	erythrocyte membrane protein 1, PfEMP1
PF3D7_0411800	N/A	conserved Plasmodium protein, unknown function
PF3D7_0503400	ADF1	actin-depolymerizing factor 1
PF3D7_0506900	ROM4	rhomboid protease ROM4
PF3D7_0527000	MCM3	DNA replication licensing factor MCM3, putative
PF3D7_0617300	N/A	RNA-binding protein, putative
PF3D7_0715900	CDF	cation diffusion facilitator family protein, putative
PF3D7_0727400	N/A	proteasome subunit alpha type-5, putative
PF3D7_0919900	RCC-PIP	regulator of chromosome condensation-PP1-interacting protein
PF3D7_1117700	RAN	GTP-binding nuclear protein RAN/TC4
PF3D7_1135300	N/A	conserved Plasmodium membrane protein, unknown function
PF3D7_1218400	N/A	triose or hexose phosphate/phosphate translocator, putative
PF3D7_1450000	N/A	serine/threonine protein kinase, putative
PF3D7_0105800	N/A	cyclin-dependent kinases regulatory subunit, putative
PF3D7_0111000	N/A	kinesin-8B, putative
PF3D7_0309300	N/A	N2227-like protein, putative
PF3D7_0516700	N/A	ubiquitin carboxyl-terminal hydrolase 2, putative
PF3D7_0525200	SMC6	structural maintenance of chromosomes protein 6, putative
PF3D7_0807900	TyrRS	tyrosine--tRNA ligase
PF3D7_0821000	N/A	conserved Plasmodium protein, unknown function
PF3D7_0909700	N/A	FHA domain protein, putative
PF3D7_0924600	N/A	conserved Plasmodium protein, unknown function
PF3D7_1003800	EFTUD2	U5 small nuclear ribonucleoprotein component, putative
PF3D7_1145200	N/A	serine/threonine protein kinase, putative
PF3D7_1206700	EIF5	eukaryotic translation initiation factor 5, putative
PF3D7_1307800	CEP170	centrosomal protein CEP170, putative
PF3D7_1313100	N/A	conserved Plasmodium protein, unknown function
PF3D7_1317100	MCM4	DNA replication licensing factor MCM4
PF3D7_1317900	NOC4	nucleolar complex protein 4, putative
PF3D7_1326500	N/A	conserved Plasmodium protein, unknown function
PF3D7_1417600	N/A	ookinete surface and oocyst capsule protein OSCP, putative
PF3D7_1448300	N/A	conserved protein, unknown function
PF3D7_1451200	N/A	conserved Plasmodium protein, unknown function
PF3D7_1459000	DBP5	ATP-dependent RNA helicase DBP5
PF3D7_0316300	PPase	inorganic pyrophosphatase
PF3D7_0409600	RPA1	replication protein A1, large subunit
PF3D7_0415400	N/A	coatomer subunit zeta, putative
PF3D7_0525500	N/A	WD repeat-containing protein, putative
PF3D7_0607600	SAS6	spindle assembly abnormal protein 6, putative
PF3D7_0616900	N/A	conserved Plasmodium protein, unknown function
PF3D7_0826900	N/A	conserved Plasmodium protein, unknown function
PF3D7_1115200	SET7	histone-lysine N-methyltransferase SET7
PF3D7_1206200	EIF3C	eukaryotic translation initiation factor 3 subunit C, putative
PF3D7_1416200	MCA3	metacaspase-3
PF3D7_0114000	EPF1	exported protein family 1
PF3D7_0201900	EMP3	erythrocyte membrane protein 3
PF3D7_0321100	N/A	conserved Plasmodium protein, unknown function
PF3D7_0402400	GEXP18	Plasmodium exported protein, unknown function
PF3D7_0507100	RPL4	60S ribosomal protein L4
PF3D7_0806300	FLP	ferlin-like protein, putative
PF3D7_0807200	N/A	conserved Plasmodium membrane protein, unknown function
PF3D7_0903300	N/A	conserved protein, unknown function
PF3D7_0920800	IMPDH	inosine-5'-monophosphate dehydrogenase
PF3D7_0922700	PRP18	pre-mRNA-splicing factor 18, putative
PF3D7_1015600	HSP60	heat shock protein 60
PF3D7_1140800	N/A	conserved Plasmodium protein, unknown function
PF3D7_1147300	N/A	conserved Plasmodium protein, unknown function
PF3D7_1350100	KRS1	lysine--tRNA ligase
PF3D7_1437300	N/A	conserved Plasmodium protein, unknown function
PF3D7_1476300	N/A	Plasmodium exported protein (PHISTb), unknown function
PF3D7_0217500	CDPK1	calcium-dependent protein kinase 1
PF3D7_0218100	N/A	conserved protein, unknown function
PF3D7_0218600	N/A	patatin-like phospholipase, putative
PF3D7_0321600	DDX42	ATP-dependent RNA helicase DDX42, putative
PF3D7_0416000	N/A	RNA-binding protein, putative
PF3D7_0526500	N/A	conserved Plasmodium protein, unknown function
PF3D7_0531100	N/A	conserved Plasmodium protein, unknown function
PF3D7_0604300	N/A	conserved Plasmodium protein, unknown function
PF3D7_0605300	ARK1	serine/threonine protein kinase ARK1
PF3D7_0611800	N/A	conserved Plasmodium protein, unknown function
PF3D7_0614700	N/A	F-box protein FBXO6, putative
PF3D7_0614900	N/A	conserved Plasmodium membrane protein, unknown function
PF3D7_0619700	N/A	F-box protein FBXO1, putative
PF3D7_0621900	SRP68	signal recognition particle subunit SRP68, putative
PF3D7_0627700	N/A	transportin
PF3D7_0709300	MED14	mediator of RNA polymerase II transcription subunit 14, putative
PF3D7_0717300	N/A	transcription initiation factor IIE subunit alpha, putative
PF3D7_0717600	IMC32	inner membrane complex protein, putative
PF3D7_0810000	N/A	acyl-CoA binding protein, putative
PF3D7_0933900	N/A	conserved Plasmodium protein, unknown function
PF3D7_0935900	REX1	ring-exported protein 1
PF3D7_1003400	N/A	conserved Plasmodium protein, unknown function
PF3D7_1003600	IMC1c	inner membrane complex protein 1c, putative
PF3D7_1005500	UPF1	regulator of nonsense transcripts 1, putative
PF3D7_1007200	N/A	rho GTPase-activating protein, putative
PF3D7_1013500	PI-PLC	phosphoinositide-specific phospholipase C
PF3D7_1016300	GBP130	GBP130 protein
PF3D7_1033500	WDR70	WD repeat-containing protein 70, putative
PF3D7_1037600	XPB	TFIIH basal transcription factor complex helicase XPB subunit, putative
PF3D7_1103700	CK2beta1	casein kinase II beta chain
PF3D7_1104300	N/A	conserved Plasmodium protein, unknown function
PF3D7_1128000	N/A	conserved Plasmodium protein, unknown function
PF3D7_1132000	N/A	ubiquitin-like protein, putative
PF3D7_1136000	N/A	conserved Plasmodium protein, unknown function
PF3D7_1138500	PPM2	protein phosphatase PPM2
PF3D7_1144600	TFG2	transcription initiation factor IIF subunit beta, putative
PF3D7_1147600	N/A	conserved Plasmodium protein, unknown function
PF3D7_1201500	N/A	GPN-loop GTPase, putative
PF3D7_1207400	N/A	conserved Plasmodium protein, unknown function
PF3D7_1213200	MED18	mediator of RNA polymerase II transcription subunit 18, putative
PF3D7_1223200	N/A	nucleus export protein BRR6, putative
PF3D7_1235500	MT-A70.2	N6-adenosine-methyltransferase, putative
PF3D7_1238500	N/A	conserved Plasmodium protein, unknown function
PF3D7_1239800	N/A	conserved Plasmodium protein, unknown function
PF3D7_1248200	RBM22	pre-mRNA-splicing factor RBM22, putative
PF3D7_1308000	N/A	conserved Plasmodium membrane protein, unknown function
PF3D7_1314700	N/A	pinin/SDK/MemA domain-containing protein, putative
PF3D7_1315300	N/A	conserved protein, unknown function
PF3D7_1319000	N/A	conserved Plasmodium protein, unknown function
PF3D7_1323800	VPS52	vacuolar protein sorting-associated protein 52, putative
PF3D7_1330000	N/A	PITH domain-containing protein, putative
PF3D7_1333600	UTP4	U3 small nucleolar RNA-associated protein 4, putative
PF3D7_1337900	N/A	conserved Plasmodium protein, unknown function
PF3D7_1339700	N/A	conserved Plasmodium protein, unknown function
PF3D7_1341500	ISC1	inner membrane complex suture component, putative
PF3D7_1346300	ALBA2	DNA/RNA-binding protein Alba 2
PF3D7_1407200	N/A	conserved Plasmodium protein, unknown function
PF3D7_1408000	PMII	plasmepsin II
PF3D7_1408600	N/A	40S ribosomal protein S8e, putative
PF3D7_1441500	N/A	conserved Plasmodium protein, unknown function
PF3D7_1443000	SRPK2	serine/threonine protein kinase
PF3D7_1453200	N/A	conserved Plasmodium protein, unknown function
PF3D7_1461300	N/A	40S ribosomal protein S28e, putative
PF3D7_1461600	SF3B2	splicing factor 3B subunit 2, putative
PF3D7_0405700	N/A	lysine decarboxylase, putative
PF3D7_0619300	N/A	conserved Plasmodium protein, unknown function
PF3D7_0629400	PABP3	polyadenylate-binding protein 3, putative
PF3D7_0920400	N/A	conserved Plasmodium protein, unknown function
PF3D7_1004400	N/A	RNA-binding protein, putative
PF3D7_1106800	pTKL	pseudo-tyrosine kinase-like protein
PF3D7_1110200	PRPF6	pre-mRNA-processing factor 6, putative
PF3D7_1208100	N/A	conserved Plasmodium protein, unknown function
PF3D7_1220300	N/A	cell cycle associated protein, putative
PF3D7_1248500	N/A	bax inhibitor 1, putative
PF3D7_1326700	N/A	conserved Apicomplexan protein, unknown function
PF3D7_0411100	MED8	mediator of RNA polymerase II transcription subunit 8, putative
PF3D7_0604500	N/A	GYF domain-containing protein, putative
PF3D7_0610400	H3	histone H3
PF3D7_0617900	H3.3	histone H3 variant
PF3D7_0707600	MED10	mediator of RNA polymerase II transcription subunit 10, putative
PF3D7_0719500	CDC50A	LEM3/CDC50 family protein, putative
PF3D7_0910200	N/A	conserved Plasmodium protein, unknown function
PF3D7_1145100	SEC21	coatomer subunit gamma, putative
PF3D7_1202900	HMGB1	high mobility group protein B1
PF3D7_1205100	SEPSECS	O-phosphoseryl-tRNA(Sec) selenium transferase, putative
PF3D7_1234900	N/A	CHCH domain-containing protein, putative
PF3D7_1235100	N/A	conserved protein, unknown function
PF3D7_1336200	N/A	conserved Plasmodium protein, unknown function
PF3D7_1337800	CDPK5	calcium-dependent protein kinase 5
PF3D7_1352700	AQR	intron-binding protein aquarius, putative
PF3D7_1352800	MON1	vacuolar fusion protein MON1, putative
PF3D7_1430800	PIP3	PhIL1 interacting protein PIP3
PF3D7_1460100	FCP	FYVE and coiled-coil domain-containing protein
PF3D7_1471200	SulP	inorganic anion exchanger, inorganic anion antiporter
PF3D7_0504800	N/A	conserved Plasmodium protein, unknown function
PF3D7_0704100	BTP2	basal complex transmembrane protein 2
PF3D7_0707500	N/A	conserved Plasmodium protein, unknown function
PF3D7_0803400	RAD54	DNA repair and recombination protein RAD54, putative
PF3D7_1003000	N/A	guanylate cyclase organizer UGO, putative
PF3D7_1126500	N/A	WD repeat-containing protein, putative
PF3D7_1131500	N/A	conserved Plasmodium protein, unknown function
PF3D7_1233900	SENP1	sentrin-specific protease 1
PF3D7_1334700	MSRP7	MSP7-like protein
PF3D7_1351400	N/A	60S ribosomal protein L17, putative
PF3D7_1456000	AP2-HC	AP2 domain transcription factor AP2-HC
PF3D7_0108300	ARP	conserved Plasmodium protein, unknown function
PF3D7_0112200	MRP1	multidrug resistance-associated protein 1
PF3D7_0203000	ROPE	repetitive organellar protein, putative
PF3D7_0302100	SRPK1	serine/threonine protein kinase
PF3D7_0308700	N/A	conserved protein, unknown function
PF3D7_0416300	MCM9	DNA helicase MCM9, putative
PF3D7_0518600	WDR26	WD repeat-containing protein 26, putative
PF3D7_0532400	LyMP	lysine-rich membrane-associated PHISTb protein
PF3D7_0815600	EIF3G	eukaryotic translation initiation factor 3 subunit G, putative
PF3D7_0823200	N/A	RNA-binding protein, putative
PF3D7_0831000	GEXP09	Plasmodium exported protein (PHISTb), unknown function
PF3D7_1018200	PPP8	serine/threonine protein phosphatase 8, putative
PF3D7_1104900	N/A	calcium/calmodulin-dependent protein kinase, putative
PF3D7_1121100	N/A	conserved protein, unknown function
PF3D7_1124100	BDCP	BEACH domain-containing protein, putative
PF3D7_1124400	LSM1	U6 snRNA-associated Sm-like protein LSm1, putative
PF3D7_1133200	N/A	conserved Plasmodium protein, unknown function
PF3D7_1217500	N/A	conserved Plasmodium protein, unknown function
PF3D7_1237000	UBA2	SUMO-activating enzyme subunit 2
PF3D7_1339900	ABCB5	ABC transporter B family member 5, putative
PF3D7_1346400	N/A	VPS13 domain-containing protein, putative
PF3D7_1366500	NDK	nucleoside diphosphate kinase
PF3D7_1367500	N/A	NADH-cytochrome b5 reductase, putative
PF3D7_1401200	N/A	Plasmodium exported protein, unknown function
PF3D7_1416600	N/A	conserved Plasmodium protein, unknown function
PF3D7_1419400	N/A	conserved Plasmodium membrane protein, unknown function
PF3D7_1438900	Trx-Px1	thioredoxin peroxidase 1
PF3D7_0218200	N/A	SUZ domain-containing protein, putative
PF3D7_0301700	N/A	Plasmodium exported protein, unknown function
PF3D7_0302900	N/A	exportin-1, putative
PF3D7_0305300	N/A	transporter, putative
PF3D7_0305500	N/A	protein dopey homolog, putative
PF3D7_0307200	N/A	60S ribosomal protein L7, putative
PF3D7_0403200	N/A	pre-mRNA splicing factor, putative
PF3D7_0406900	N/A	conserved Plasmodium protein, unknown function
PF3D7_0410900	N/A	conserved Plasmodium protein, unknown function
PF3D7_0422500	BRR2	pre-mRNA-splicing helicase BRR2, putative
PF3D7_0517700	EIF3B	eukaryotic translation initiation factor 3 subunit B, putative
PF3D7_0521900	N/A	conserved Plasmodium protein, unknown function
PF3D7_0527900	DDX41	ATP-dependent RNA helicase DDX41, putative
PF3D7_0602900	N/A	conserved Plasmodium protein, unknown function
PF3D7_0606500	PTB	polypyrimidine tract-binding protein, putative
PF3D7_0624200	N/A	SURP domain-containing protein, putative
PF3D7_0709000	CRT	chloroquine resistance transporter
PF3D7_0723400	N/A	conserved Plasmodium protein, unknown function
PF3D7_0905800	N/A	conserved Plasmodium protein, unknown function
PF3D7_0908600	N/A	ribosomal RNA methyltransferase, putative
PF3D7_0921900	N/A	conserved Plasmodium protein, unknown function
PF3D7_0923400	N/A	conserved Plasmodium protein, unknown function
PF3D7_0926800	N/A	conserved Plasmodium protein, unknown function
PF3D7_1011200	BET1	BET1-like protein, putative
PF3D7_1011400	N/A	proteasome subunit beta type-5
PF3D7_1013900	N/A	translation initiation factor eIF-2B subunit delta, putative
PF3D7_1014400	MRK	MO15-related protein kinase
PF3D7_1021100	N/A	conserved Plasmodium protein, unknown function
PF3D7_1023900	CHD1	chromodomain-helicase-DNA-binding protein 1 homolog, putative
PF3D7_1122900	N/A	dynein heavy chain, putative
PF3D7_1132600	PRP38A	pre-mRNA-splicing factor 38A, putative
PF3D7_1141800	N/A	EELM2 domain-containing protein, putative
PF3D7_1225800	UBA1	ubiquitin-activating enzyme E1
PF3D7_1231600	PRP2	pre-mRNA-splicing factor ATP-dependent RNA helicase PRP2, putative
PF3D7_1233200	N/A	conserved Plasmodium protein, unknown function
PF3D7_1238900	PK2	protein kinase 2
PF3D7_1245100	KLP8	kinesin-13, putative
PF3D7_1305000	N/A	MCL1 domain-containing protein, putative
PF3D7_1317000	USP39	U4/U6.U5 tri-snRNP-associated protein 2, putative
PF3D7_1321200	N/A	zinc finger protein, putative
PF3D7_1321700	SF1	splicing factor 1
PF3D7_1331500	N/A	conserved Plasmodium protein, unknown function
PF3D7_1342400	CK2beta2	casein kinase II beta chain
PF3D7_1342900	AP2-HS	AP2 domain transcription factor AP2-HS
PF3D7_1348900	N/A	conserved Plasmodium protein, unknown function
PF3D7_1349200	N/A	glutamate--tRNA ligase, putative
PF3D7_1352400	N/A	conserved Plasmodium protein, unknown function
PF3D7_1353800	N/A	proteasome subunit alpha type-4, putative
PF3D7_1359600	N/A	conserved Plasmodium protein, unknown function
PF3D7_1369200	N/A	conserved Plasmodium protein, unknown function
PF3D7_1423700	N/A	conserved Plasmodium protein, unknown function
PF3D7_1426000	RPL21	60S ribosomal protein L21
PF3D7_1446700	N/A	conserved Plasmodium protein, unknown function
PF3D7_1447200	N/A	conserved protein, unknown function
PF3D7_0316800	N/A	40S ribosomal protein S15A, putative
PF3D7_0516500	MFS1	major facilitator superfamily domain-containing protein, putative
PF3D7_0714200	N/A	conserved Plasmodium protein, unknown function
PF3D7_1033900	N/A	ubiquitin-conjugating enzyme E2, putative
PF3D7_1116500	FT2	folate transporter 2
PF3D7_1224000	GCH1	GTP cyclohydrolase 1
PF3D7_1407500	TRM112	multifunctional methyltransferase subunit TRM112, putative
PF3D7_1426100	BTF3	transcription factor BTF3, putative
PF3D7_0317500	EG5	kinesin-5
PF3D7_0323000	TMA7	translation machinery-associated protein 7, putative
PF3D7_0619400	N/A	cell division cycle protein 48 homologue, putative
PF3D7_1016000	N/A	conserved Plasmodium protein, unknown function
PF3D7_1109900	RPL36	60S ribosomal protein L36
PF3D7_1112600	N/A	ATPase, putative
PF3D7_1123100	CDPK7	calcium-dependent protein kinase 7
PF3D7_1311500	RPT1	26S protease regulatory subunit 7, putative
PF3D7_1344100	N/A	TLD domain-containing protein, putative
PF3D7_0308100	N/A	zinc finger protein, putative
PF3D7_0412200	N/A	conserved Plasmodium protein, unknown function
PF3D7_0716800	EIF3I	eukaryotic translation initiation factor 3 subunit I, putative
PF3D7_0926100	N/A	protein kinase, putative
PF3D7_1036900	N/A	conserved Plasmodium protein, unknown function
PF3D7_1130200	PfP0	60S ribosomal protein P0
PF3D7_1134300	EMMA1	erythrocyte membrane and merozoite antigen EMMA1
PF3D7_1217200	MRD1	multiple RNA-binding domain-containing protein 1, putative
PF3D7_1227600	SPC24	kinetochore protein SPC24, putative
PF3D7_1249600	LRR12	leucine-rich repeat protein
PF3D7_1344700	N/A	conserved Plasmodium protein, unknown function
PF3D7_1449700	RRP6	exosome complex exonuclease RRP6
PF3D7_1453400	N/A	gamma-tubulin complex component, putative
PF3D7_1466100	PPKL	protein phosphatase containing kelch-like domains
PF3D7_0211200	RAB5a	ras-related protein Rab-5A
PF3D7_0520100	PPM9	protein phosphatase PPM9, putative
PF3D7_0826600	VAMP7	SNARE protein, putative
PF3D7_0904900	CuTP	copper-transporting ATPase
PF3D7_1133400	AMA1	apical membrane antigen 1
PF3D7_1226800	ATX3	ataxin-3, putative
PF3D7_1358800	RPS15	40S ribosomal protein S15
PF3D7_1415000	UDG	uracil-DNA glycosylase
PF3D7_1445200	MAK5	ATP-dependent RNA helicase MAK5, putative
PF3D7_1451100	eEF2	elongation factor 2
PF3D7_0204500	AspAT	aspartate transaminase
PF3D7_0310200	N/A	phd finger protein, putative
PF3D7_0319100	RBX1	E3 ubiquitin-protein ligase RBX1, putative
PF3D7_0402000	N/A	Plasmodium exported protein (PHISTa), unknown function
PF3D7_0408300	ZRANB2	zinc finger Ran-binding domain-containing protein 2, putative
PF3D7_0410800	N/A	conserved Plasmodium protein, unknown function
PF3D7_0413900	USP13	ubiquitin carboxyl-terminal hydrolase 13, putative
PF3D7_0505800	SUMO	small ubiquitin-related modifier
PF3D7_0516800	ApiAP2	AP2 domain transcription factor AP2-O2, putative
PF3D7_0517300	SR1	serine/arginine-rich splicing factor 1
PF3D7_0520900	SAHH	adenosylhomocysteinase
PF3D7_0610600	CDPK2	calcium-dependent protein kinase 2
PF3D7_0627800	ACAS	acetyl-CoA synthetase
PF3D7_0704300	N/A	conserved Plasmodium membrane protein, unknown function
PF3D7_0717500	CDPK4	calcium-dependent protein kinase 4
PF3D7_0728600	N/A	RING zinc finger protein, putative
PF3D7_0809700	RUVB1	RuvB-like helicase 1
PF3D7_0820000	SRCAP	Snf2-related CBP activator, putative
PF3D7_0823800	N/A	DnaJ protein, putative
PF3D7_0825900	N/A	conserved Plasmodium protein, unknown function
PF3D7_0903700	N/A	alpha tubulin 1
PF3D7_0909900	N/A	helicase SKI2W, putative
PF3D7_0919000	NAPS	nucleosome assembly protein
PF3D7_0919800	N/A	TLD domain-containing protein
PF3D7_1013200	N/A	conserved Plasmodium protein, unknown function
PF3D7_1021800	SEA1	schizont egress antigen-1
PF3D7_1107100	N/A	nucleic acid binding protein, putative
PF3D7_1107400	RAD51	DNA repair protein RAD51
PF3D7_1113400	DSK2	ubiquitin domain-containing protein DSK2, putative
PF3D7_1123400	ERF3	eukaryotic peptide chain release factor GTP-binding subunit, putative
PF3D7_1139100	N/A	RNA-binding protein, putative
PF3D7_1143900	N/A	ATP-dependent (S)-NAD(P)H-hydrate dehydratase, putative
PF3D7_1223100	PKAr	cAMP-dependent protein kinase regulatory subunit
PF3D7_1242700	N/A	40S ribosomal protein S17, putative
PF3D7_1245500	N/A	conserved Plasmodium protein, unknown function
PF3D7_1303400	LisH	LisH domain-containing protein, putative
PF3D7_1303800	N/A	conserved Plasmodium protein, unknown function
PF3D7_1309200	PPM6	protein phosphatase PPM6, putative
PF3D7_1310400	N/A	conserved Plasmodium protein, unknown function
PF3D7_1316100	IPK2	inositol polyphosphate kinase, putative
PF3D7_1325900	N/A	conserved Plasmodium protein, unknown function
PF3D7_1342000	N/A	40S ribosomal protein S6
PF3D7_1405700	N/A	RING zinc finger protein, putative
PF3D7_1406200	SPT6	transcription elongation factor SPT6, putative
PF3D7_1411200	ROM8	rhomboid protease ROM8
PF3D7_1412600	DHS	deoxyhypusine synthase
PF3D7_1427300	N/A	conserved Plasmodium protein, unknown function
PF3D7_1433500	TOP2	DNA topoisomerase 2
PF3D7_1434200	CAM	calmodulin
PF3D7_1441400	FACT-S	FACT complex subunit SSRP1, putative
PF3D7_1470100	N/A	conserved Plasmodium protein, unknown function
PF3D7_0316500	NUF2	kinetochore protein NUF2, putative
PF3D7_0523800	N/A	divalent metal transporter, putative
PF3D7_0812500	N/A	RNA-binding protein, putative
PF3D7_1011800	PREBP	PRE-binding protein
PF3D7_1027700	CEN3	centrin-3
PF3D7_1032100	DCP1	mRNA-decapping enzyme subunit 1, putative
PF3D7_1107800	ApiAP2	AP2 domain transcription factor, putative
PF3D7_1209000	N/A	mago-binding protein, putative
PF3D7_1229100	MRP2	multidrug resistance-associated protein 2
PF3D7_1243500	SNF7	vacuolar-sorting protein SNF7, putative
PF3D7_1356400	N/A	phosphatase 2A regulatory subunit-related protein, putative
PF3D7_1365000	N/A	conserved Plasmodium protein, unknown function
PF3D7_1440100	N/A	cohesin complex subunit, putative
PF3D7_1452700	N/A	U1 snRNP-associated protein, putative
PF3D7_1468800	U2AF2	splicing factor U2AF large subunit, putative
PF3D7_0530000	N/A	conserved Plasmodium protein, unknown function
PF3D7_1233600	AARP1	asparagine and aspartate rich protein 1
PF3D7_1362400	Pcalp	calpain
PF3D7_1409900	CDS	cytidine diphosphate-diacylglycerol synthase
PF3D7_1428200	MFS5	major facilitator superfamily domain-containing protein, putative
PF3D7_0104300	UBP1	ubiquitin carboxyl-terminal hydrolase 1, putative
PF3D7_0108500	N/A	ELM2 domain-containing protein, putative
PF3D7_0422300	N/A	alpha tubulin 2
PF3D7_0615400	N/A	ribonuclease, putative
PF3D7_0809900	JmjC1	JmjC domain-containing protein 1, putative
PF3D7_0906100	VPS46	vacuolar protein sorting-associated protein 46, putative
PF3D7_0936800	N/A	Plasmodium exported protein (PHISTc), unknown function
PF3D7_1115800	N/A	conserved Plasmodium protein, unknown function
PF3D7_1119400	N/A	ubiquitin-protein ligase, putative
PF3D7_1222700	GAP45	glideosome-associated protein 45
PF3D7_1443100	N/A	conserved Plasmodium protein, unknown function
PF3D7_1444200	N/A	EF-hand calcium-binding domain-containing protein, putative
PF3D7_0210300	N/A	monocarboxylate transporter, putative
PF3D7_0318500	N/A	conserved Plasmodium protein, unknown function
PF3D7_0519400	RPS24	40S ribosomal protein S24
PF3D7_0530900	FRM1	formin 1
PF3D7_0531300	N/A	conserved Plasmodium protein, unknown function
PF3D7_0627500	DJ1	protein DJ-1
PF3D7_1015900	ENO	enolase
PF3D7_1223000	N/A	conserved Plasmodium protein, unknown function
PF3D7_0219200	RPS30	40S ribosomal protein S30
PF3D7_0304100	IMC1e	inner membrane complex protein 1e, putative
PF3D7_0307700	N/A	conserved Plasmodium protein, unknown function
PF3D7_0308300	PIC4	PhIL1-interacting candidate PIC4
PF3D7_0309200	ARK2	serine/threonine protein kinase ARK2, putative
PF3D7_0323500	SMN	survival motor neuron-like protein
PF3D7_0414600	APH	acylated pleckstrin-homology domain-containing protein, putative
PF3D7_0522100	N/A	conserved Plasmodium protein, unknown function
PF3D7_0525000	N/A	zinc finger protein, putative
PF3D7_0526400	N/A	conserved Plasmodium protein, unknown function
PF3D7_0532300	N/A	Plasmodium exported protein (PHISTb), unknown function
PF3D7_0616600	N/A	conserved protein, unknown function
PF3D7_0625200	N/A	conserved Plasmodium protein, unknown function
PF3D7_0703600	N/A	conserved protein, unknown function
PF3D7_0704200	NSUN1	RNA cytosine C(5)-methyltransferase, putative
PF3D7_0723900	N/A	RNA-binding protein, putative
PF3D7_0802000	GDH3	glutamate dehydrogenase, putative
PF3D7_0922100	N/A	ubiquitin-like protein, putative
PF3D7_0922500	PGK	phosphoglycerate kinase
PF3D7_0924000	N/A	patatin-like phospholipase, putative
PF3D7_0928800	N/A	serine/threonine protein kinase, putative
PF3D7_0930600	CYP72	peptidyl-prolyl cis-trans isomerase
PF3D7_1008100	PHD1	PHD finger protein PHD1
PF3D7_1011700	RAD23	DNA repair protein RAD23, putative
PF3D7_1033300	N/A	conserved protein, unknown function
PF3D7_1119900	SEC16	protein transport protein SEC16, putative
PF3D7_1122500	KIC10	protein KIC10
PF3D7_1127900	N/A	conserved Plasmodium protein, unknown function
PF3D7_1132400	N/A	conserved Plasmodium membrane protein, unknown function
PF3D7_1234100	BDP5	bromodomain protein 5
PF3D7_1317600	N/A	conserved Plasmodium protein, unknown function
PF3D7_1320900	N/A	RNA-binding protein, putative
PF3D7_1326300	N/A	RNA-binding protein, putative
PF3D7_1332200	N/A	conserved protein, unknown function
PF3D7_1333800	N/A	Voldacs domain-containing protein, putative
PF3D7_1341900	N/A	V-type proton ATPase subunit D, putative
PF3D7_1360100	RRM1	RNA-binding protein, putative
PF3D7_1364200	NUP205	nucleoporin NUP205, putative
PF3D7_1412400	N/A	conserved Plasmodium protein, unknown function
PF3D7_1417700	N/A	conserved protein, unknown function
PF3D7_1435400	EMC4	ER membrane protein complex subunit 4, putative
PF3D7_1455300	N/A	conserved protein, unknown function
PF3D7_1460600	ISP3	inner membrane complex sub-compartment protein 3
PF3D7_1470300	N/A	conserved Plasmodium protein, unknown function
PF3D7_0105700	N/A	asparagine-rich antigen Pfa35-2
PF3D7_0707400	N/A	AAA family ATPase, putative
PF3D7_1113300	UGT	UDP-galactose transporter, putative
PF3D7_1142100	N/A	conserved Plasmodium protein, unknown function
PF3D7_1316600	CCT	choline-phosphate cytidylyltransferase
PF3D7_1323200	N/A	V-type proton ATPase subunit G, putative
PF3D7_0629500	AAT1	amino acid transporter AAT1
PF3D7_0630300	N/A	DNA polymerase epsilon catalytic subunit A, putative
PF3D7_1002800	N/A	DnaJ protein, putative
PF3D7_0219700	GEXP20	Plasmodium exported protein (PHISTc), unknown function
[truncated: 1,189 more rows]
