# Supplementary material for: Complementary crosstalk between palmitoylation and phosphorylation events in MTIP regulates its role during Plasmodium falciparum invasion
Source: Front Cell Infect Microbiol. 2022 Sep 29;12:924424. doi: 10.3389/fcimb.2022.924424 (PMC9556994; doi:10.3389/fcimb.2022.924424)
Supplement: Supplementary Table 3 — Cumulative palmitome of Plasmodium falciparum 3D7. [file Table_3.xlsx]

## Sheet: Palmitome
Palmitoylable Proteins	Name	Product						Palmitoylated Proteins	Name	Product
PF3D7_0100100	VAR	erythrocyte membrane protein 1, PfEMP1						PF3D7_0102200	RESA	ring-infected erythrocyte surface antigen
PF3D7_0100300	VAR	erythrocyte membrane protein 1, PfEMP1						PF3D7_0102600	FIKK1	serine/threonine protein kinase, FIKK family
PF3D7_0100400	RIF	rifin						PF3D7_0103200	NT4	nucleoside transporter 4
PF3D7_0101000	RIF	rifin						PF3D7_0103900	PIESP15	parasite-infected erythrocyte surface protein
PF3D7_0101100	EPF4	exported protein family 4						PF3D7_0104100	N/A	protein E140, putative
PF3D7_0101300	MC-2TM	Pfmc-2TM Maurer's cleft two transmembrane protein						PF3D7_0104800	NPT1	novel putative transporter 1, putative
PF3D7_0102200	RESA	ring-infected erythrocyte surface antigen						PF3D7_0105200	N/A	heptatricopeptide repeat and RAP domain-containing protein, putative
PF3D7_0102500	EBA181	erythrocyte binding antigen-181						PF3D7_0106800	RAB5c	ras-related protein Rab-5C
PF3D7_0102600	FIKK1	serine/threonine protein kinase, FIKK family						PF3D7_0107500	NCR1	Niemann-Pick type C1-related protein
PF3D7_0102700	MaTrA	merozoite-associated tryptophan-rich antigen						PF3D7_0112900	N/A	Plasmodium exported protein, unknown function
PF3D7_0102800	N/A	seipin domain-containing protein, putative						PF3D7_0113900	CBP1	CX3CL1-binding protein 1
PF3D7_0102900	N/A	aspartate--tRNA ligase						PF3D7_0115600	RIF	rifin
PF3D7_0103200	NT4	nucleoside transporter 4						PF3D7_0202000	KAHRP	knob-associated histidine-rich protein
PF3D7_0103400	N/A	zinc-carboxypeptidase, putative						PF3D7_0202200	PTP1	EMP1-trafficking protein
PF3D7_0103500	N/A	conserved Plasmodium protein, unknown function						PF3D7_0202900	DHHC12	palmitoyltransferase DHHC12, putative
PF3D7_0103600	PSH1	ATP-dependent DNA/RNA helicase PSH1						PF3D7_0204700	HT1	hexose transporter
PF3D7_0103700	PSTK	L-seryl-tRNA(Sec) kinase, putative						PF3D7_0205900	RPN1	26S proteasome regulatory subunit RPN1, putative
PF3D7_0103800	ARP1	actin-related protein ARP1, putative						PF3D7_0207500	SERA6	serine repeat antigen 6
PF3D7_0103900	PIESP15	parasite-infected erythrocyte surface protein						PF3D7_0207600	SERA5	serine repeat antigen 5
PF3D7_0104100	N/A	protein E140, putative						PF3D7_0208800	N/A	protein P22, putative
PF3D7_0104300	UBP1	ubiquitin carboxyl-terminal hydrolase 1, putative						PF3D7_0210200	N/A	conserved Plasmodium protein, unknown function
PF3D7_0104400	LytB	4-hydroxy-3-methylbut-2-enyl diphosphate reductase						PF3D7_0210600	CERLI1	protein CERLI1
PF3D7_0104500	N/A	conserved protein, unknown function						PF3D7_0211800	AsnRS	asparagine--tRNA ligase
PF3D7_0104600	N/A	conserved Plasmodium protein, unknown function						PF3D7_0212400	N/A	conserved Plasmodium membrane protein, unknown function
PF3D7_0104700	MFR2	major facilitator superfamily-related transporter, putative						PF3D7_0212500	N/A	conserved Plasmodium protein, unknown function
PF3D7_0104800	NPT1	novel putative transporter 1, putative						PF3D7_0213100	SIS1	protein SIS1
PF3D7_0105100	N/A	conserved Apicomplexan protein, unknown function						PF3D7_0215300	ACS8	acyl-CoA synthetase
PF3D7_0105200	N/A	heptatricopeptide repeat and RAP domain-containing protein, putative						PF3D7_0215900	DHHC11	palmitoyltransferase DHHC11, putative
PF3D7_0105400	N/A	conserved Plasmodium protein, unknown function						PF3D7_0217500	CDPK1	calcium-dependent protein kinase 1
PF3D7_0105500	N/A	conserved protein, unknown function						PF3D7_0218500	SNRPD2	small nuclear ribonucleoprotein Sm D2, putative
PF3D7_0105600	N/A	FtsJ-like methyltransferase, putative						PF3D7_0220200	N/A	Plasmodium exported protein, unknown function
PF3D7_0105700	N/A	asparagine-rich antigen Pfa35-2						PF3D7_0220800	CLAG2	cytoadherence linked asexual protein 2
PF3D7_0106100	N/A	V-type proton ATPase subunit C, putative						PF3D7_0221200	N/A	Plasmodium exported protein (hyp15), unknown function
PF3D7_0106300	ATP6	calcium-transporting ATPase						PF3D7_0223100	RIF	rifin
PF3D7_0106500	N/A	conserved Plasmodium protein, unknown function						PF3D7_0300900	N/A	stevor
PF3D7_0106800	RAB5c	ras-related protein Rab-5C						PF3D7_0302500	CLAG3.1	cytoadherence linked asexual protein 3.1
PF3D7_0107200	CCR4-3	CCR4 domain-containing protein 3, putative						PF3D7_0303400	DHHC1	palmitoyltransferase DHHC1
PF3D7_0107300	N/A	conserved Plasmodium protein, unknown function						PF3D7_0303700	BCKDH-E2	lipoamide acyltransferase component of branched-chain alpha-keto acid dehydrogenase complex
PF3D7_0107500	NCR1	Niemann-Pick type C1-related protein						PF3D7_0304100	IMC1e	inner membrane complex protein 1e, putative
PF3D7_0107600	eIK2	eukaryotic translation initiation factor 2-alpha kinase 2, putative						PF3D7_0305600	APE1	DNA-(apurinic or apyrimidinic site) endonuclease
PF3D7_0107700	N/A	dolichyl-diphosphooligosaccharide--protein glycosyltransferase subunit OST3/OST6, putative						PF3D7_0306400	N/A	FAD-dependent glycerol-3-phosphate dehydrogenase, putative
PF3D7_0108000	N/A	proteasome subunit beta type-3, putative						PF3D7_0306900	N/A	40S ribosomal protein S23, putative
PF3D7_0108100	N/A	conserved protein, unknown function						PF3D7_0308200	CCT7	T-complex protein 1 subunit eta
PF3D7_0108300	ARP	conserved Plasmodium protein, unknown function						PF3D7_0308600	PRPF19	pre-mRNA-processing factor 19, putative
PF3D7_0108400	N/A	mitochondrial carrier protein, putative						PF3D7_0309600	PfP2	60S acidic ribosomal protein P2
PF3D7_0108600	N/A	DnaJ domain-containing protein, putative						PF3D7_0310400	PIESP1	parasite-infected erythrocyte surface protein
PF3D7_0108700	PSOP24	secreted ookinete protein, putative						PF3D7_0316600	FNT	formate-nitrite transporter
PF3D7_0108800	N/A	mitochondrial carrier protein, putative						PF3D7_0316700	YOP1	protein YOP1, putative
PF3D7_0109100	CCp5	LCCL domain-containing protein						PF3D7_0316900	N/A	E3 ubiquitin-protein ligase, putative
PF3D7_0109300	N/A	elongation of fatty acids protein, putative						PF3D7_0317000	N/A	proteasome subunit alpha type-3, putative
PF3D7_0109850	N/A	phosphatidate cytidylyltransferase, putative						PF3D7_0317600	RPS11	40S ribosomal protein S11, putative
PF3D7_0110000	N/A	conserved Plasmodium protein, unknown function						PF3D7_0318100	STOML	stomatin-like protein, putative
PF3D7_0110200	ERV1	FAD-linked sulfhydryl oxidase ERV1, putative						PF3D7_0318900	N/A	conserved protein, unknown function
PF3D7_0110400	RPB9	DNA-directed RNA polymerase II subunit RPB9, putative						PF3D7_0319700	ABCI3	ABC transporter I family member 1, putative
PF3D7_0110500	BDP3	bromodomain protein 3, putative						PF3D7_0320700	SPC25	signal peptidase complex subunit 2
PF3D7_0110600	PIP5K	phosphatidylinositol-4-phosphate 5-kinase						PF3D7_0320800	DOZI	ATP-dependent RNA helicase DDX6
PF3D7_0111000	N/A	kinesin-8B, putative						PF3D7_0322000	CYP19A	peptidyl-prolyl cis-trans isomerase
PF3D7_0111200	N/A	conserved protein, unknown function						PF3D7_0402000	N/A	Plasmodium exported protein (PHISTa), unknown function
PF3D7_0111400	GEXP19	conserved Plasmodium protein, unknown function						PF3D7_0405600	N/A	TMEM33 domain-containing protein, putative
PF3D7_0111600	N/A	conserved Plasmodium protein, unknown function						PF3D7_0405900	ASP	apical sushi protein
PF3D7_0112200	MRP1	multidrug resistance-associated protein 1						PF3D7_0406100	N/A	V-type proton ATPase subunit B
PF3D7_0112900	N/A	Plasmodium exported protein, unknown function						PF3D7_0407200	PTH2	peptidyl-tRNA hydrolase 2, putative
PF3D7_0113000	GARP	glutamic acid-rich protein GARP						PF3D7_0409400	DnaJ	chaperone protein DnaJ
PF3D7_0113200	N/A	Plasmodium exported protein, unknown function						PF3D7_0413500	PGM2	phosphoglucomutase-2
PF3D7_0113800	N/A	DBL containing protein, unknown function						PF3D7_0416400	HAT1	histone acetyltransferase, putative
PF3D7_0113900	CBP1	CX3CL1-binding protein 1						PF3D7_0417300	N/A	LETM1-like protein, putative
PF3D7_0114100	MC-2TM	Pfmc-2TM Maurer's cleft two transmembrane protein						PF3D7_0418500	BET3	trafficking protein particle complex subunit 3, putative
PF3D7_0114500	N/A	Plasmodium exported protein (hyp10), unknown function						PF3D7_0419700	Pf34	apical merozoite protein
PF3D7_0114800	N/A	Plasmodium exported protein (hyp7), unknown function						PF3D7_0422100	N/A	transmembrane emp24 domain-containing protein, putative
PF3D7_0115200	RIF	rifin						PF3D7_0423500	GAPM2	glideosome associated protein with multiple membrane spans 2
PF3D7_0115400	N/A	stevor						PF3D7_0424500	FIKK4.1	serine/threonine protein kinase, FIKK family
PF3D7_0115700	VAR	erythrocyte membrane protein 1, PfEMP1						PF3D7_0425100	N/A	Plasmodium exported protein (hyp6), unknown function
PF3D7_0200100	VAR	erythrocyte membrane protein 1, PfEMP1						PF3D7_0500800	MESA	mature parasite-infected erythrocyte surface antigen
PF3D7_0200400	N/A	stevor						PF3D7_0501000	N/A	Plasmodium exported protein, unknown function
PF3D7_0200500	RIF	rifin						PF3D7_0501200	PIESP2	parasite-infected erythrocyte surface protein
PF3D7_0201000	RIF	rifin						PF3D7_0501500	RAP3	rhoptry-associated protein 3
PF3D7_0201400	N/A	Plasmodium exported protein (hyp10), unknown function						PF3D7_0501600	RAP2	rhoptry-associated protein 2
PF3D7_0201500	N/A	Plasmodium exported protein (hyp9), unknown function						PF3D7_0503400	ADF1	actin-depolymerizing factor 1
PF3D7_0201600	RLP1	PHISTb domain-containing RESA-like protein 1						PF3D7_0504600	BCKDHB	2-oxoisovalerate dehydrogenase subunit beta, mitochondrial, putative
PF3D7_0201700	N/A	DnaJ protein, putative						PF3D7_0504900	N/A	transmembrane protein TMEM222, putative
PF3D7_0201800	KAHsp40	knob associated heat shock protein 40						PF3D7_0506900	ROM4	rhomboid protease ROM4
PF3D7_0202000	KAHRP	knob-associated histidine-rich protein						PF3D7_0508000	P38	6-cysteine protein
PF3D7_0202100	LSAP2	liver stage associated protein 2						PF3D7_0508300	TPT	triose phosphate transporter
PF3D7_0202300	N/A	Plasmodium exported protein (hyp11), unknown function						PF3D7_0508800	SSB	single-stranded DNA-binding protein
PF3D7_0202600	N/A	nucleic acid-binding protein, putative						PF3D7_0508900	AAP6	protein AAP6
PF3D7_0202700	OPP	octaprenyl pyrophosphate synthase						PF3D7_0511200	SCD	stearoyl-CoA desaturase
PF3D7_0202800	N/A	conserved Plasmodium protein, unknown function						PF3D7_0513300	PNP	purine nucleoside phosphorylase
PF3D7_0203000	ROPE	repetitive organellar protein, putative						PF3D7_0513600	N/A	deoxyribodipyrimidine photo-lyase, putative
PF3D7_0203100	N/A	protein kinase, putative						PF3D7_0515700	GAP40	glideosome-associated protein 40, putative
PF3D7_0203300	ERCC1	ERCC1 nucleotide excision repair protein, putative						PF3D7_0517000	N/A	60S ribosomal protein L12, putative
PF3D7_0203600	N/A	conserved Plasmodium protein, unknown function						PF3D7_0520400	N/A	single-stranded DNA-binding protein, putative
PF3D7_0203700	MAK16	protein MAK16, putative						PF3D7_0520900	SAHH	adenosylhomocysteinase
PF3D7_0203800	N/A	conserved Plasmodium protein, unknown function						PF3D7_0522600	N/A	magnesium transporter NIPA, putative
PF3D7_0203900	N/A	5'-3' exonuclease, putative						PF3D7_0523000	MDR1	multidrug resistance protein 1
PF3D7_0204000	CAPH2	condensin-2 complex subunit H2, putative						PF3D7_0523100	QCR2	mitochondrial-processing peptidase subunit alpha, putative
PF3D7_0204100	N/A	Sel1 repeat-containing protein, putative						PF3D7_0523400	N/A	DnaJ protein, putative
PF3D7_0204200	SEC66	translocation protein SEC66, putative						PF3D7_0525800	IMC1g	inner membrane complex protein 1g, putative
PF3D7_0204500	AspAT	aspartate transaminase						PF3D7_0528400	DHHC7	palmitoyltransferase DHHC7
PF3D7_0204600	N/A	5'-3' exonuclease, putative						PF3D7_0529000	TIP	T-cell immunomodulatory protein homolog, putative
PF3D7_0204700	HT1	hexose transporter						PF3D7_0529800	N/A	conserved Plasmodium protein, unknown function
PF3D7_0204800	N/A	3'-5' exonuclease, putative						PF3D7_0532100	ETRAMP5	early transcribed membrane protein 5
PF3D7_0205000	N/A	conserved Plasmodium protein, unknown function						PF3D7_0532300	N/A	Plasmodium exported protein (PHISTb), unknown function
PF3D7_0205100	N/A	conserved Plasmodium protein, unknown function						PF3D7_0601200	MC-2TM	Pfmc-2TM Maurer's cleft two transmembrane protein
PF3D7_0205300	N/A	conserved Plasmodium protein, unknown function						PF3D7_0604100	SIP2	AP2 domain transcription factor
PF3D7_0205400	N/A	PCI domain-containing protein, putative						PF3D7_0604700	GILP	glyoxalase I-like protein GILP
PF3D7_0205500	N/A	DNA-directed RNA polymerase II 16 kDa subunit, putative						PF3D7_0606800	VFT1	VFT protein
PF3D7_0206100	SufE	cysteine desulfuration protein SufE						PF3D7_0607400	N/A	G-protein associated signal transduction protein, putative
PF3D7_0206500	N/A	conserved Plasmodium protein, unknown function						PF3D7_0607700	N/A	conserved Plasmodium protein, unknown function
PF3D7_0206600	N/A	DNA-directed RNA polymerase III subunit RPC10, putative						PF3D7_0608300	N/A	heptatricopeptide repeat-containing protein, putative
PF3D7_0206900	MSP5	merozoite surface protein 5						PF3D7_0608310	SAM50	sorting assembly machinery 50 kDa subunit, putative
PF3D7_0207000	MSP4	merozoite surface protein 4						PF3D7_0608700	CCT6	T-complex protein 1 subunit zeta
PF3D7_0207100	N/A	conserved Plasmodium protein, unknown function						PF3D7_0608800	OAT	ornithine aminotransferase
PF3D7_0207200	ISCA1	iron-sulfur assembly protein, putative						PF3D7_0609100	ZIP1	zinc transporter ZIP1, putative
PF3D7_0207300	SERA8	serine repeat antigen 8						PF3D7_0609200	N/A	citrate synthase-like protein, putative
PF3D7_0207400	SERA7	serine repeat antigen 7						PF3D7_0609800	DHHC2	palmitoyltransferase DHHC2, putative
PF3D7_0207500	SERA6	serine repeat antigen 6						PF3D7_0611600	BTP1	basal complex transmembrane protein 1
PF3D7_0207600	SERA5	serine repeat antigen 5						PF3D7_0612200	LRR6	leucine-rich repeat protein
PF3D7_0207700	SERA4	serine repeat antigen 4						PF3D7_0612700	P12	6-cysteine protein P12
PF3D7_0207800	SERA3	serine repeat antigen 3						PF3D7_0612800	P12p	6-cysteine protein P12p
PF3D7_0208000	SERA1	serine repeat antigen 1						PF3D7_0613300	ROP14	rhoptry protein ROP14
PF3D7_0208100	N/A	conserved Plasmodium protein, unknown function						PF3D7_0613900	MyoE	myosin E, putative
PF3D7_0208300	N/A	conserved Plasmodium protein, unknown function						PF3D7_0614300	MFR1	major facilitator superfamily-related transporter, putative
PF3D7_0208400	N/A	conserved Plasmodium protein, unknown function						PF3D7_0617000	TOM40	mitochondrial import receptor subunit TOM40, putative
PF3D7_0208800	N/A	protein P22, putative						PF3D7_0617200	N/A	BFR1 domain-containing protein, putative
PF3D7_0209000	P230	6-cysteine protein P230						PF3D7_0617600	N/A	stevor
PF3D7_0209200	MTR3	exosome complex component MTR3, putative						PF3D7_0617800	H2A	histone H2A
PF3D7_0209400	N/A	ARMT1-like domain-containing protein, putative						PF3D7_0617900	H3.3	histone H3 variant
PF3D7_0209700	N/A	RING zinc finger protein, putative						PF3D7_0618000	N/A	conserved Plasmodium membrane protein, unknown function
PF3D7_0210200	N/A	conserved Plasmodium protein, unknown function						PF3D7_0619400	N/A	cell division cycle protein 48 homologue, putative
PF3D7_0210300	N/A	monocarboxylate transporter, putative						PF3D7_0620400	MSP10	merozoite surface protein 10
PF3D7_0210400	N/A	50S ribosomal protein L33, putative						PF3D7_0621200	PDX1	pyridoxine biosynthesis protein PDX1
PF3D7_0210500	N/A	conserved Plasmodium protein, unknown function						PF3D7_0626100	N/A	oxidoreductase, short-chain dehydrogenase family, putative
PF3D7_0210600	CERLI1	protein CERLI1						PF3D7_0626700	N/A	ATPase
PF3D7_0210800	N/A	conserved Plasmodium protein, unknown function						PF3D7_0626800	PyrK	pyruvate kinase
PF3D7_0210900	N/A	conserved Plasmodium protein, unknown function						PF3D7_0627500	DJ1	protein DJ-1
PF3D7_0211100	N/A	conserved Plasmodium protein, unknown function						PF3D7_0628300	CEPT	choline/ethanolaminephosphotransferase, putative
PF3D7_0211200	RAB5a	ras-related protein Rab-5A						PF3D7_0629200	N/A	DnaJ protein, putative
PF3D7_0211300	N/A	ubiquinol-cytochrome-c reductase complex assembly factor 1, putative						PF3D7_0632100	RIF	rifin
PF3D7_0211400	KASIII	beta-ketoacyl-ACP synthase III						PF3D7_0700300	RIF	rifin
PF3D7_0211500	N/A	GAF domain-related protein, putative						PF3D7_0702500	N/A	Plasmodium exported protein, unknown function
PF3D7_0211600	ALG14	UDP-N-acetylglucosamine transferase subunit ALG14, putative						PF3D7_0703900	N/A	conserved Plasmodium membrane protein, unknown function
PF3D7_0211700	TKL1	tyrosine kinase-like protein, putative						PF3D7_0704300	N/A	conserved Plasmodium membrane protein, unknown function
PF3D7_0211800	AsnRS	asparagine--tRNA ligase						PF3D7_0704800	PPM12	protein phosphatase PPM12, putative
PF3D7_0212000	N/A	GDP-fructose:GMP antiporter, putative						PF3D7_0705400	MCM7	DNA replication licensing factor MCM7
PF3D7_0212100	N/A	conserved Plasmodium protein, unknown function						PF3D7_0707300	RAMA	rhoptry-associated membrane antigen
PF3D7_0212400	N/A	conserved Plasmodium membrane protein, unknown function						PF3D7_0708400	HSP90	heat shock protein 90
PF3D7_0212500	N/A	conserved Plasmodium protein, unknown function						PF3D7_0708800	HSP110c	heat shock protein 110
PF3D7_0212600	SPATR	secreted protein with altered thrombospondin repeat domain						PF3D7_0709000	CRT	chloroquine resistance transporter
PF3D7_0212700	N/A	SRR1-like protein						PF3D7_0711000	CDC48	AAA family ATPase, CDC48 subfamily
PF3D7_0212800	MATE	multidrug efflux pump, putative						PF3D7_0713100	MC-2TM	Pfmc-2TM Maurer's cleft two transmembrane protein
PF3D7_0212900	ATEL1	arginyl-tRNA--protein transferase						PF3D7_0714300	DHHC4	palmitoyltransferase DHHC4, putative
PF3D7_0213100	SIS1	protein SIS1						PF3D7_0715200	N/A	conserved Plasmodium protein, unknown function
PF3D7_0213200	N/A	mitochondrial respiratory chain complex II subunit, putative						PF3D7_0716800	EIF3I	eukaryotic translation initiation factor 3 subunit I, putative
PF3D7_0213300	N/A	conserved protein, unknown function						PF3D7_0719500	CDC50A	LEM3/CDC50 family protein, putative
PF3D7_0213600	N/A	conserved Plasmodium protein, unknown function						PF3D7_0719600	N/A	60S ribosomal protein L11a, putative
PF3D7_0213700	N/A	conserved protein, unknown function						PF3D7_0720400	AIF	apoptosis-inducing factor, putative
PF3D7_0213800	N/A	conserved protein, unknown function						PF3D7_0721600	N/A	40S ribosomal protein S5, putative
PF3D7_0213900	N/A	RTR1 domain-containing protein, putative						PF3D7_0727200	NFS1	cysteine desulfurase IscS
PF3D7_0214100	SEC31	protein transport protein SEC31						PF3D7_0729200	AOP	1-cys peroxiredoxin
PF3D7_0214300	N/A	conserved Plasmodium protein, unknown function						PF3D7_0730400	IMP2	IMP1-like protein, putative
PF3D7_0214500	N/A	conserved Plasmodium protein, unknown function						PF3D7_0731600	ACS5	acyl-CoA synthetase
PF3D7_0214600	STK2	serine/threonine protein kinase STK2, putative						PF3D7_0800200	VAR	erythrocyte membrane protein 1, PfEMP1
PF3D7_0215100	N/A	RING zinc finger protein, putative						PF3D7_0802200	1-CysPxn	1-cys peroxiredoxin
PF3D7_0215300	ACS8	acyl-CoA synthetase						PF3D7_0804500	N/A	conserved Plasmodium membrane protein, unknown function
PF3D7_0215700	RPB2	DNA-directed RNA polymerase II subunit RPB2, putative						PF3D7_0806800	N/A	V-type proton ATPase subunit a, putative
PF3D7_0215900	DHHC11	palmitoyltransferase DHHC11, putative						PF3D7_0807300	RAB18	ras-related protein Rab-18
PF3D7_0216000	N/A	DEAD/DEAH box helicase, putative						PF3D7_0807900	TyrRS	tyrosine--tRNA ligase
PF3D7_0216100	N/A	conserved Plasmodium protein, unknown function						PF3D7_0810300	PPM5	protein phosphatase PPM5, putative
PF3D7_0216200	N/A	Alba domain-containing protein, putative						PF3D7_0810800	PPPK-DHPS	hydroxymethyldihydropterin pyrophosphokinase-dihydropteroate synthase
PF3D7_0216300	N/A	conserved Plasmodium protein, unknown function						PF3D7_0811200	EMC1	ER membrane protein complex subunit 1, putative
PF3D7_0216400	VPS45	vacuolar protein sorting-associated protein 45						PF3D7_0811600	N/A	conserved protein, unknown function
PF3D7_0216500	N/A	conserved Plasmodium protein, unknown function						PF3D7_0812100	N/A	proteasome activator complex subunit 4, putative
PF3D7_0216600	N/A	sugar transporter, putative						PF3D7_0813400	N/A	conserved protein, unknown function
PF3D7_0216700	ATG11	autophagy-related protein 11, putative						PF3D7_0815500	N/A	conserved Plasmodium protein, unknown function
PF3D7_0217100	N/A	ATP synthase subunit alpha, mitochondrial						PF3D7_0816200	VPS2	vacuolar protein sorting-associated protein 2, putative
PF3D7_0217300	AP2S	AP-2 complex subunit sigma, putative						PF3D7_0816900	AK2	adenylate kinase 2
PF3D7_0217400	N/A	conserved protein, unknown function						PF3D7_0817700	RON5	rhoptry neck protein 5
PF3D7_0217500	CDPK1	calcium-dependent protein kinase 1						PF3D7_0818200	14-3-3I	14-3-3 protein
PF3D7_0217600	N/A	conserved Plasmodium protein, unknown function						PF3D7_0818900	HSP70	heat shock protein 70
PF3D7_0217700	N/A	E2F-associated phosphoprotein, putative						PF3D7_0819600	N/A	ubiquitin-like protein, putative
PF3D7_0218200	N/A	SUZ domain-containing protein, putative						PF3D7_0820400	N/A	conserved Plasmodium protein, unknown function
PF3D7_0218300	N/A	rRNA methyltransferase, putative						PF3D7_0820500	YIF1	protein transport protein YIF1, putative
PF3D7_0218600	N/A	patatin-like phospholipase, putative						PF3D7_0820700	KDH	2-oxoglutarate dehydrogenase E1 component
PF3D7_0219100	N/A	saccharopine dehydrogenase, putative						PF3D7_0821000	N/A	conserved Plasmodium protein, unknown function
PF3D7_0219300	N/A	conserved Plasmodium protein, unknown function						PF3D7_0822900	PIC2	PhIL1-interacting candidate PIC2
PF3D7_0219500	N/A	pseudouridine synthase, putative						PF3D7_0823800	N/A	DnaJ protein, putative
PF3D7_0219900	N/A	Plasmodium exported protein, unknown function						PF3D7_0823900	DTC	dicarboxylate/tricarboxylate carrier
PF3D7_0220200	N/A	Plasmodium exported protein, unknown function						PF3D7_0824400	NT2	nucleoside transporter 2
PF3D7_0220300	N/A	Plasmodium exported protein, unknown function						PF3D7_0827900	PDI8	protein disulfide-isomerase
PF3D7_0220500	N/A	Plasmodium exported protein (hyp2), unknown function						PF3D7_0828500	N/A	translation initiation factor eIF-2B subunit alpha, putative
PF3D7_0220800	CLAG2	cytoadherence linked asexual protein 2						PF3D7_0828800	GAMA	GPI-anchored micronemal antigen
PF3D7_0221000	N/A	Plasmodium exported protein, unknown function						PF3D7_0829500	N/A	conserved Plasmodium protein, unknown function
PF3D7_0221400	N/A	stevor						PF3D7_0831600	CLAG8	cytoadherence linked asexual protein 8
PF3D7_0222100	MC-2TM	Pfmc-2TM Maurer's cleft two transmembrane protein						PF3D7_0901800	N/A	Plasmodium exported protein, unknown function
PF3D7_0223200	RIF	rifin						PF3D7_0904800	RPA1	replication protein A1, small fragment
PF3D7_0223500	VAR	erythrocyte membrane protein 1, PfEMP1						PF3D7_0904900	CuTP	copper-transporting ATPase
PF3D7_0300100	VAR	erythrocyte membrane protein 1, PfEMP1						PF3D7_0905100	NUP221	nucleoporin NUP221, putative
PF3D7_0301100	N/A	Plasmodium exported protein (hyp13), unknown function						PF3D7_0905400	RhopH3	high molecular weight rhoptry protein 3
PF3D7_0301300	EH1	epoxide hydrolase 1						PF3D7_0910300	N/A	conserved protein, unknown function
PF3D7_0301400	N/A	Plasmodium exported protein, unknown function						PF3D7_0910800	NBP35	cytosolic Fe-S cluster assembly factor NBP35, putative
PF3D7_0301500	N/A	Plasmodium exported protein, unknown function						PF3D7_0910900	N/A	DNA primase large subunit, putative
PF3D7_0301900	N/A	conserved protein, unknown function						PF3D7_0912400	N/A	alkaline phosphatase, putative
PF3D7_0302000	PRP46	pre-mRNA-splicing factor PRP46, putative						PF3D7_0914200	N/A	phospholipid or glycerol acyltransferase, putative
PF3D7_0302200	CLAG3.2	cytoadherence linked asexual protein 3.2						PF3D7_0914700	MFR4	major facilitator superfamily-related transporter, putative
PF3D7_0302500	CLAG3.1	cytoadherence linked asexual protein 3.1						PF3D7_0915000	NDH2	type II NADH:ubiquinone oxidoreductase
PF3D7_0302600	ABCB4	ABC transporter B family member 4, putative						PF3D7_0916400	N/A	conserved Plasmodium protein, unknown function
PF3D7_0302900	N/A	exportin-1, putative						PF3D7_0917600	PRP43	pre-mRNA-splicing factor ATP-dependent RNA helicase PRP43, putative
PF3D7_0303000	NSF	N-ethylmaleimide-sensitive fusion protein						PF3D7_0917900	BIP	heat shock protein 70
PF3D7_0303100	N/A	CLP1 P-loop domain-containing protein, putative						PF3D7_0918000	GAP50	glideosome-associated protein 50
PF3D7_0303500	N/A	spindle pole body protein, putative						PF3D7_0919100	N/A	DnaJ protein, putative
PF3D7_0303600	Plrx	plasmoredoxin						PF3D7_0919900	RCC-PIP	regulator of chromosome condensation-PP1-interacting protein
PF3D7_0303700	BCKDH-E2	lipoamide acyltransferase component of branched-chain alpha-keto acid dehydrogenase complex						PF3D7_0920800	IMPDH	inosine-5'-monophosphate dehydrogenase
PF3D7_0303800	N/A	IBR domain protein, putative						PF3D7_0922200	SAMS	S-adenosylmethionine synthetase
PF3D7_0303900	N/A	phosphatidylethanolamine-binding protein, putative						PF3D7_0922500	PGK	phosphoglycerate kinase
PF3D7_0304000	IMC1a	inner membrane complex protein 1a, putative						PF3D7_0923000	RPB3	DNA-directed RNA polymerase II subunit RPB3, putative
PF3D7_0304100	IMC1e	inner membrane complex protein 1e, putative						PF3D7_0923800	TRXR	thioredoxin reductase
PF3D7_0304300	N/A	conserved Plasmodium protein, unknown function						PF3D7_0924700	SF3A3	splicing factor 3A subunit 3, putative
PF3D7_0304400	RPL44	60S ribosomal protein L44						PF3D7_0925900	LCN	lipocalin
PF3D7_0304700	N/A	conserved Plasmodium protein, unknown function						PF3D7_0927900	PSD	phosphatidylserine decarboxylase
PF3D7_0304800	N/A	conserved Plasmodium membrane protein, unknown function						PF3D7_0929400	RhopH2	high molecular weight rhoptry protein 2
PF3D7_0305000	EF-Ts	elongation factor Ts						PF3D7_0930300	MSP1	merozoite surface protein 1
PF3D7_0305100	N/A	conserved Plasmodium protein, unknown function						PF3D7_0932000	N/A	conserved Plasmodium protein, unknown function
PF3D7_0305200	N/A	GRIP domain-containing protein, putative						PF3D7_0932500	DHHC6	palmitoyltransferase DHHC6, putative
PF3D7_0305300	N/A	transporter, putative						PF3D7_0934500	N/A	V-type proton ATPase subunit E, putative
PF3D7_0305400	N/A	conserved protein, unknown function						PF3D7_0935800	CLAG9	cytoadherence linked asexual protein 9
PF3D7_0305500	N/A	protein dopey homolog, putative						PF3D7_0936800	N/A	Plasmodium exported protein (PHISTc), unknown function
PF3D7_0305800	N/A	P-loop containing nucleoside triphosphate hydrolase, putative						PF3D7_0937500	RIF	rifin
PF3D7_0306200	AHA1	activator of Hsp90 ATPase						PF3D7_1002900	N/A	conserved Plasmodium protein, unknown function
PF3D7_0306400	N/A	FAD-dependent glycerol-3-phosphate dehydrogenase, putative						PF3D7_1003600	IMC1c	inner membrane complex protein 1c, putative
PF3D7_0307500	SKA2	spindle and kinetochore-associated protein 2, putative						PF3D7_1005500	UPF1	regulator of nonsense transcripts 1, putative
PF3D7_0307900	N/A	conserved Plasmodium protein, unknown function						PF3D7_1006800	GBP2	G-strand-binding protein 2
PF3D7_0308000	N/A	DNA polymerase delta small subunit, putative						PF3D7_1007900	EIF3D	eukaryotic translation initiation factor 3 subunit D, putative
PF3D7_0308100	N/A	zinc finger protein, putative						PF3D7_1008700	N/A	tubulin beta chain
PF3D7_0308200	CCT7	T-complex protein 1 subunit eta						PF3D7_1008900	AK1	adenylate kinase
PF3D7_0308300	PIC4	PhIL1-interacting candidate PIC4						PF3D7_1010700	N/A	dolichyl-phosphate-mannose--protein mannosyltransferase, putative
PF3D7_0308600	PRPF19	pre-mRNA-processing factor 19, putative						PF3D7_1011000	ISP1	inner membrane complex sub-compartment protein 1
PF3D7_0308700	N/A	conserved protein, unknown function						PF3D7_1011500	N/A	conserved protein, unknown function
PF3D7_0308900	SF3B1	splicing factor 3B subunit 1, putative						PF3D7_1012400	HGPRT	hypoxanthine-guanine phosphoribosyltransferase
PF3D7_0309000	YVH1	dual specificity protein phosphatase						PF3D7_1012600	GMPS	GMP synthase [glutamine-hydrolyzing]
PF3D7_0309100	OMD	OMD protein, putative						PF3D7_1012900	ATG18	autophagy-related protein 18
PF3D7_0309300	N/A	N2227-like protein, putative						PF3D7_1013300	N/A	conserved Plasmodium protein, unknown function
PF3D7_0309600	PfP2	60S acidic ribosomal protein P2						PF3D7_1015600	HSP60	heat shock protein 60
PF3D7_0309700	SBP2	SECIS-binding protein 2, putative						PF3D7_1015900	ENO	enolase
PF3D7_0309900	N/A	conserved Plasmodium protein, unknown function						PF3D7_1016300	GBP130	GBP130 protein
PF3D7_0310100	CDPK3	calcium-dependent protein kinase 3						PF3D7_1018300	N/A	peptidase, putative
PF3D7_0310200	N/A	phd finger protein, putative						PF3D7_1019400	N/A	60S ribosomal protein L30e, putative
PF3D7_0310300	N/A	phosphoglycerate mutase, putative						PF3D7_1019900	ATG8	autophagy-related protein 8
PF3D7_0310400	PIESP1	parasite-infected erythrocyte surface protein						PF3D7_1020900	ARF1	ADP-ribosylation factor 1
PF3D7_0310500	DHX57	ATP-dependent RNA helicase DHX57, putative						PF3D7_1022300	ZIPCO	ZIP domain-containing protein, putative
PF3D7_0311000	N/A	conserved Plasmodium protein, unknown function						PF3D7_1022700	PLSCR	phospholipid scramblase
PF3D7_0311200	N/A	valine--tRNA ligase, putative						PF3D7_1025900	N/A	conserved protein, unknown function
PF3D7_0311300	N/A	phosphatidylinositol 3- and 4-kinase, putative						PF3D7_1027800	RPL3	60S ribosomal protein L3
PF3D7_0311400	PKRP	kinase-related protein PKRP, putative						PF3D7_1027900	DHHC10	palmitoyltransferase DHHC10, putative
PF3D7_0311700	PM6	plasmepsin VI						PF3D7_1028400	N/A	ribosome biogenesis protein RPF2, putative
PF3D7_0311900	N/A	heptatricopeptide repeat-containing protein, putative						PF3D7_1029600	ADA	adenosine deaminase
PF3D7_0312100	N/A	E3 ubiquitin-protein ligase						PF3D7_1033200	ETRAMP10.2	early transcribed membrane protein 10.2
PF3D7_0312200	N/A	tetratricopeptide repeat protein, putative						PF3D7_1037100	PyKII	pyruvate kinase 2
PF3D7_0312300	RPN12	26S proteasome regulatory subunit RPN12, putative						PF3D7_1037300	AAC1	ADP,ATP carrier protein 1
PF3D7_0312900	N/A	hypothetical protein						PF3D7_1101700	MC-2TM	Pfmc-2TM Maurer's cleft two transmembrane protein
PF3D7_0313000	N/A	conserved Plasmodium protein, unknown function						PF3D7_1102600	GEXP14	Plasmodium exported protein, unknown function
PF3D7_0313400	N/A	conserved Plasmodium protein, unknown function						PF3D7_1104100	SYN13	syntaxin, Qa-SNARE family
PF3D7_0313500	PfG	Ras-like G protein						PF3D7_1104400	Trx-mero	thioredoxin-like mero protein
PF3D7_0313600	N/A	conserved Plasmodium protein, unknown function						PF3D7_1105400	RPS4	40S ribosomal protein S4, putative
PF3D7_0313700	N/A	conserved Plasmodium protein, unknown function						PF3D7_1105700	RTCB	tRNA-splicing ligase RtcB, putative
PF3D7_0313800	N/A	conserved Plasmodium protein, unknown function						PF3D7_1105800	N/A	conserved Apicomplexan protein, unknown function
PF3D7_0313900	N/A	conserved Plasmodium protein, unknown function						PF3D7_1106000	RUVB2	RuvB-like helicase 2
PF3D7_0314000	N/A	HSP20-like chaperone, putative						PF3D7_1107400	RAD51	DNA repair protein RAD51
PF3D7_0314300	DER1-2	DER1-like protein						PF3D7_1108500	SCS-alpha	succinate--CoA ligase [ADP-forming] subunit alpha, putative
PF3D7_0314600	N/A	conserved protein, unknown function						PF3D7_1108700	Pfj2	heat shock protein J2
PF3D7_0314700	RNF1	RING finger protein RNF1						PF3D7_1111900	N/A	Josephin domain-containing protein, putative
PF3D7_0315000	N/A	zinc finger protein, putative						PF3D7_1113100	PRL	protein tyrosine phosphatase
PF3D7_0315100	eIF4E	eukaryotic translation initiation factor 4E						PF3D7_1115400	FP3	cysteine proteinase falcipain 3
PF3D7_0315200	CTRP	circumsporozoite- and TRAP-related protein						PF3D7_1115600	CYP19B	peptidyl-prolyl cis-trans isomerase
PF3D7_0315300	N/A	conserved Plasmodium protein, unknown function						PF3D7_1115900	DHHC9	palmitoyltransferase DHHC9
PF3D7_0315400	N/A	conserved Plasmodium protein, unknown function						PF3D7_1116000	RON4	rhoptry neck protein 4
PF3D7_0315600	N/A	zinc finger protein, putative						PF3D7_1116100	N/A	serine esterase, putative
PF3D7_0315700	N/A	conserved Plasmodium membrane protein, unknown function						PF3D7_1116500	FT2	folate transporter 2
PF3D7_0315800	N/A	zinc finger protein, putative						PF3D7_1117300	N/A	conserved protein, unknown function
PF3D7_0315900	N/A	conserved Plasmodium protein, unknown function						PF3D7_1117700	RAN	GTP-binding nuclear protein RAN/TC4
PF3D7_0316100	N/A	ribosomal protein L27, mitochondrial, putative						PF3D7_1118200	N/A	heat shock protein 90, putative
PF3D7_0316200	N/A	conserved Plasmodium protein, unknown function						PF3D7_1119000	N/A	acyl-CoA-binding protein, putative
PF3D7_0316300	PPase	inorganic pyrophosphatase						PF3D7_1119800	ASF1	alternative splicing factor ASF-1, putative
PF3D7_0316400	N/A	CS domain-containing protein, putative						PF3D7_1120400	N/A	alpha/beta hydrolase fold domain containing protein, putative
PF3D7_0316600	FNT	formate-nitrite transporter						PF3D7_1121000	DHHC3	palmitoyltransferase DHHC3
PF3D7_0316800	N/A	40S ribosomal protein S15A, putative						PF3D7_1123300	N/A	RING zinc finger protein, putative
PF3D7_0316900	N/A	E3 ubiquitin-protein ligase, putative						PF3D7_1123500	GP2	golgi protein 2
PF3D7_0317000	N/A	proteasome subunit alpha type-3, putative						PF3D7_1124000	ERO1	endoplasmic reticulum oxidoreductin, putative
PF3D7_0317100	B9	6-cysteine protein						PF3D7_1124600	EK	ethanolamine kinase
PF3D7_0317200	CRK4	cdc2-related protein kinase 4						PF3D7_1126000	ThrRS	threonine--tRNA ligase
PF3D7_0317400	N/A	DNA replication complex GINS protein, putative						PF3D7_1127000	N/A	protein phosphatase, putative
PF3D7_0317500	EG5	kinesin-5						PF3D7_1127500	N/A	protein disulfide-isomerase, putative
PF3D7_0317700	N/A	CPSF (cleavage and polyadenylation specific factor), subunit A, putative						PF3D7_1127600	N/A	CRAL/TRIO domain-containing protein, putative
PF3D7_0317900	N/A	conserved protein, unknown function						PF3D7_1129000	SpdSyn	spermidine synthase
PF3D7_0318000	N/A	conserved Plasmodium protein, unknown function						PF3D7_1129900	MFR5	major facilitator superfamily-related transporter, putative
PF3D7_0318200	RPB1	DNA-directed RNA polymerase II subunit RPB1						PF3D7_1130200	PfP0	60S ribosomal protein P0
PF3D7_0318300	N/A	conserved Plasmodium protein, unknown function						PF3D7_1132200	TCP1	T-complex protein 1 subunit alpha
PF3D7_0318500	N/A	conserved Plasmodium protein, unknown function						PF3D7_1132300	N/A	nucleic acid binding protein, putative
PF3D7_0318900	N/A	conserved protein, unknown function						PF3D7_1132800	AQP	aquaglyceroporin
PF3D7_0319000	ATPase7	P4-type ATPase ATP7, putative						PF3D7_1134000	HSP70-3	heat shock protein 70
PF3D7_0319200	CCR4-4	CCR4 domain-containing protein 4, putative						PF3D7_1134100	PDI-11	protein disulfide-isomerase, putative
PF3D7_0319400	N/A	kinesin-8X						PF3D7_1135400	N/A	HotDog domain-containing protein, putative
PF3D7_0319700	ABCI3	ABC transporter I family member 1, putative						PF3D7_1135900	N/A	3-oxo-5-alpha-steroid 4-dehydrogenase, putative
PF3D7_0319900	N/A	conserved protein, unknown function						PF3D7_1136800	N/A	DnaJ protein, putative
PF3D7_0320100	SEC22	protein transport protein SEC22						PF3D7_1137300	N/A	CLPTM1 domain-containing protein, putative
PF3D7_0320200	N/A	CPW-WPC family protein						PF3D7_1137400	N/A	UVB-resistance protein UVR8 homologue
PF3D7_0320400	Cap380	oocyst capsule protein Cap380						PF3D7_1140400	N/A	conserved Plasmodium protein, unknown function
PF3D7_0320500	Nico	nicotinamidase, putative						PF3D7_1142100	N/A	conserved Plasmodium protein, unknown function
PF3D7_0320800	DOZI	ATP-dependent RNA helicase DDX6						PF3D7_1142600	N/A	60S ribosomal protein L35ae, putative
PF3D7_0321000	N/A	conserved protein, unknown function						PF3D7_1143200	N/A	DnaJ protein, putative
PF3D7_0321100	N/A	conserved Plasmodium protein, unknown function						PF3D7_1146200	N/A	conserved Plasmodium protein, unknown function
PF3D7_0321300	N/A	conserved Plasmodium protein, unknown function						PF3D7_1148700	GEXP12	Plasmodium exported protein (PHISTc), unknown function
PF3D7_0321500	N/A	peptidase, putative						PF3D7_1149200	RESA3	ring-infected erythrocyte surface antigen
PF3D7_0321600	DDX42	ATP-dependent RNA helicase DDX42, putative						PF3D7_1200700	ACS7	acyl-CoA synthetase
PF3D7_0321700	N/A	conserved Plasmodium protein, unknown function						PF3D7_1201100	N/A	RESA-like protein with PHIST and DnaJ domains
PF3D7_0321800	N/A	WD repeat-containing protein, putative						PF3D7_1202100	SRAP1	SRAP domain-containing protein, putative
PF3D7_0321900	CARL	cyclic amine resistance locus protein						PF3D7_1202200	PIC	mitochondrial phosphate carrier protein
PF3D7_0322200	N/A	conserved protein, unknown function						PF3D7_1203700	NAPL	nucleosome assembly protein
PF3D7_0322400	N/A	regulator of initiation factor 2 (eIF2)						PF3D7_1204300	EIF5A	eukaryotic translation initiation factor 5A
PF3D7_0322500	IscA2	iron-sulfur assembly protein, putative						PF3D7_1211400	PfJ4	heat shock protein DNAJ homologue Pfj4
PF3D7_0322700	N/A	conserved Plasmodium protein, unknown function						PF3D7_1211600	LSD1	lysine-specific histone demethylase 1, putative
PF3D7_0323100	N/A	conserved Plasmodium protein, unknown function						PF3D7_1211700	MCM5	DNA replication licensing factor MCM5, putative
PF3D7_0323200	N/A	conserved Plasmodium protein, unknown function						PF3D7_1211900	ATP4	non-SERCA-type Ca2+ -transporting P-ATPase
PF3D7_0323300	N/A	conserved protein, unknown function						PF3D7_1212000	TPx(Gl)	glutathione peroxidase-like thioredoxin peroxidase
PF3D7_0323400	RIPR	Rh5 interacting protein						PF3D7_1212500	GAT	glycerol-3-phosphate 1-O-acyltransferase
PF3D7_0323700	SART1	U4/U6.U5 tri-snRNP-associated protein 1, putative						PF3D7_1214900	N/A	conserved protein, unknown function
PF3D7_0324100	MC-2TM	Pfmc-2TM Maurer's cleft two transmembrane protein						PF3D7_1218500	DRPC	dynamin-like protein, putative
PF3D7_0324300	EPF4	exported protein family 4						PF3D7_1219600	ATP2	phospholipid-transporting ATPase 2
PF3D7_0324400	RIF	rifin						PF3D7_1222300	GRP94	endoplasmin, putative
PF3D7_0324500	RIF	rifin						PF3D7_1222700	GAP45	glideosome-associated protein 45
PF3D7_0400100	VAR	erythrocyte membrane protein 1, PfEMP1						PF3D7_1223400	N/A	phospholipid-transporting ATPase, putative
PF3D7_0400400	VAR	erythrocyte membrane protein 1, PfEMP1						PF3D7_1224100	N/A	conserved protein, unknown function
PF3D7_0400900	RIF	rifin						PF3D7_1224300	PABP1	polyadenylate-binding protein 1, putative
PF3D7_0401000	RIF	rifin						PF3D7_1225800	UBA1	ubiquitin-activating enzyme E1
PF3D7_0401600	RIF	rifin						PF3D7_1226900	PV2	parasitophorous vacuolar protein 2
PF3D7_0401800	PfD80	Plasmodium exported protein (PHISTb), unknown function						PF3D7_1229300	PIC1	PhIL1-interacting candidate PIC1
PF3D7_0401900	ACS6	acyl-CoA synthetase						PF3D7_1229400	MIF	macrophage migration inhibitory factor
PF3D7_0402000	N/A	Plasmodium exported protein (PHISTa), unknown function						PF3D7_1229500	CCT3	T-complex protein 1 subunit gamma
PF3D7_0402100	N/A	Plasmodium exported protein (PHISTb), unknown function						PF3D7_1232100	CPN60	60 kDa chaperonin
PF3D7_0402400	GEXP18	Plasmodium exported protein, unknown function						PF3D7_1232200	LPD1	dihydrolipoyl dehydrogenase, mitochondrial
PF3D7_0402600	N/A	stevor						PF3D7_1232600	N/A	conserved Plasmodium protein, unknown function
PF3D7_0403200	N/A	pre-mRNA splicing factor, putative						PF3D7_1235200	VP2	V-type K+-independent H+-translocating inorganic pyrophosphatase
PF3D7_0403300	N/A	conserved Plasmodium protein, unknown function						PF3D7_1235600	SHMT	serine hydroxymethyltransferase
PF3D7_0403400	N/A	conserved Plasmodium protein, unknown function						PF3D7_1235700	N/A	ATP synthase subunit beta, mitochondrial
PF3D7_0403600	N/A	conserved Plasmodium protein, unknown function						PF3D7_1237700	N/A	conserved protein, unknown function
PF3D7_0403900	SET8	SET domain protein, putative						PF3D7_1238800	ACS11	acyl-CoA synthetase
PF3D7_0404100	ApiAP2	AP2 domain transcription factor AP2-SP2, putative						PF3D7_1239600	ThzK	hydroxyethylthiazole kinase
PF3D7_0404200	N/A	conserved Plasmodium protein, unknown function						PF3D7_1239700	FTSH1	ATP-dependent zinc metalloprotease FTSH 1
PF3D7_0404500	P52	6-cysteine protein P52						PF3D7_1245300	UBC12	NEDD8-conjugating enzyme UBC12, putative
PF3D7_0404600	N/A	conserved Plasmodium membrane protein, unknown function						PF3D7_1246300	KIC4	protein KIC4
PF3D7_0404700	DPAP3	dipeptidyl aminopeptidase 3						PF3D7_1246400	MTIP	myosin A-tail interacting protein
PF3D7_0404800	N/A	sporozoite-specific protein S10, putative						PF3D7_1246800	SRPRB	signal recognition particle receptor subunit beta, putative
PF3D7_0405000	DDX51	ATP-dependent RNA helicase DDX51, putative						PF3D7_1251300	TMK	thymidylate kinase
PF3D7_0405100	SEC24B	protein transport protein Sec24B, putative						PF3D7_1252100	RON3	rhoptry neck protein 3
PF3D7_0405300	LISP2	liver specific protein 2, putative						PF3D7_1302800	N/A	40S ribosomal protein S7, putative
PF3D7_0405400	PRPF8	pre-mRNA-processing-splicing factor 8, putative						PF3D7_1304100	LigI	DNA ligase I
PF3D7_0405600	N/A	TMEM33 domain-containing protein, putative						PF3D7_1306200	N/A	conserved protein, unknown function
PF3D7_0405700	N/A	lysine decarboxylase, putative						PF3D7_1308300	RPS27	40S ribosomal protein S27
PF3D7_0405800	N/A	conserved protein, unknown function						PF3D7_1309200	PPM6	protein phosphatase PPM6, putative
PF3D7_0406500	N/A	NYN domain-containing protein, putative						PF3D7_1310500	EMC7	ER membrane protein complex subunit 7, putative
PF3D7_0406700	N/A	KLRAQ domain-containing protein, putative						PF3D7_1310600	RAB5b	ras-related protein Rab-5B
PF3D7_0406900	N/A	conserved Plasmodium protein, unknown function						PF3D7_1310700	PIC5	PhIL1-interacting candidate PIC5
PF3D7_0407100	N/A	methyltransferase, putative						PF3D7_1311800	M1AAP	M1-family alanyl aminopeptidase
PF3D7_0407200	PTH2	peptidyl-tRNA hydrolase 2, putative						PF3D7_1312600	BCKDHA	2-oxoisovalerate dehydrogenase subunit alpha, mitochondrial, putative
PF3D7_0407300	N/A	transcription factor, putative						PF3D7_1314500	N/A	transmembrane emp24 domain-containing protein, putative
PF3D7_0407600	N/A	conserved Plasmodium protein, unknown function						PF3D7_1315000	N/A	conserved protein, unknown function
PF3D7_0407700	N/A	conserved Plasmodium protein, unknown function						PF3D7_1315300	N/A	conserved protein, unknown function
PF3D7_0408100	N/A	conserved Plasmodium protein, unknown function						PF3D7_1315500	N/A	conserved protein, unknown function
PF3D7_0408300	ZRANB2	zinc finger Ran-binding domain-containing protein 2, putative						PF3D7_1317800	RPS19	40S ribosomal protein S19
PF3D7_0408600	SIAP1	sporozoite invasion-associated protein 1						PF3D7_1318000	N/A	conserved protein, unknown function
PF3D7_0408700	PLP1	perforin-like protein 1						PF3D7_1318800	SEC63	translocation protein SEC63, putative
PF3D7_0408800	N/A	conserved Plasmodium protein, unknown function						PF3D7_1320000	GP1	golgi protein 1
PF3D7_0408900	KAE1	tRNA N6-adenosine threonylcarbamoyltransferase						PF3D7_1320600	RAB11a	ras-related protein Rab-11A
PF3D7_0409000	N/A	conserved Plasmodium protein, unknown function						PF3D7_1320800	N/A	dihydrolipoyllysine-residue succinyltransferase component of 2-oxoglutarate dehydrogenase complex
PF3D7_0409100	PRPF31	U4/U6 small nuclear ribonucleoprotein PRP31, putative						PF3D7_1321400	DHHC8	palmitoyltransferase DHHC8, putative
PF3D7_0409200	SOF1	protein SOF1, putative						PF3D7_1322500	DHHC5	palmitoyltransferase DHHC5
PF3D7_0409300	N/A	methyltransferase, putative						PF3D7_1323100	N/A	60S ribosomal protein L6, putative
PF3D7_0409400	DnaJ	chaperone protein DnaJ						PF3D7_1323500	PMV	plasmepsin V
PF3D7_0409600	RPA1	replication protein A1, large subunit						PF3D7_1324700	YKT6.2	SNARE protein, putative
PF3D7_0410000	EVP1	erythrocyte vesicle protein 1						PF3D7_1324900	LDH	L-lactate dehydrogenase
PF3D7_0410300	PPM1	protein phosphatase PPM1, putative						PF3D7_1325100	N/A	phosphoribosylpyrophosphate synthetase
PF3D7_0410400	RRP4	exosome complex component RRP4						PF3D7_1328100	N/A	proteasome subunit beta type-7, putative
PF3D7_0410700	RbgA	ribosome biogenesis GTPase A, putative						PF3D7_1331300	SEC11	signal peptidase complex catalytic subunit SEC11
PF3D7_0410800	N/A	conserved Plasmodium protein, unknown function						PF3D7_1331800	N/A	60S ribosomal protein L23, putative
PF3D7_0411200	N/A	PP-loop family protein, putative						PF3D7_1332600	APN1	DNA-(apurinic or apyrimidinic site) lyase 1
PF3D7_0411400	N/A	DEAD box ATP-dependent RNA helicase, putative						PF3D7_1333000	CPN20	20 kDa chaperonin
PF3D7_0411700	N/A	conserved Plasmodium protein, unknown function						PF3D7_1333300	N/A	transmembrane emp24 domain-containing protein, putative
PF3D7_0411800	N/A	conserved Plasmodium protein, unknown function						PF3D7_1334500	MSRP6	MSP7-like protein
PF3D7_0411900	N/A	DNA polymerase alpha catalytic subunit A						PF3D7_1335100	MSP7	merozoite surface protein 7
PF3D7_0412400	VAR	erythrocyte membrane protein 1, PfEMP1						PF3D7_1337200	DXS	1-deoxy-D-xylulose 5-phosphate synthase
PF3D7_0412700	VAR	erythrocyte membrane protein 1, PfEMP1						PF3D7_1338200	RPL6	60S ribosomal protein L6, putative
PF3D7_0413500	PGM2	phosphoglucomutase-2						PF3D7_1338300	EF-1gamma	elongation factor 1-gamma, putative
PF3D7_0413600	RPT3	26S protease regulatory subunit 6B, putative						PF3D7_1342100	IRP	aconitate hydratase
PF3D7_0413800	N/A	50S ribosomal protein L10, putative						PF3D7_1342400	CK2beta2	casein kinase II beta chain
PF3D7_0413900	USP13	ubiquitin carboxyl-terminal hydrolase 13, putative						PF3D7_1343000	PMT	phosphoethanolamine N-methyltransferase
PF3D7_0414000	SMC3	structural maintenance of chromosomes protein 3						PF3D7_1343700	Kelch13	kelch protein K13
PF3D7_0414100	N/A	conserved Plasmodium membrane protein, unknown function						PF3D7_1344200	GRP170	endoplasmic reticulum chaperone GRP170
PF3D7_0414300	N/A	Rab5-interacting protein, putative						PF3D7_1344800	ATCase	aspartate carbamoyltransferase
PF3D7_0414500	N/A	RNA-binding protein, putative						PF3D7_1345100	TRX2	thioredoxin 2
PF3D7_0414600	APH	acylated pleckstrin-homology domain-containing protein, putative						PF3D7_1345600	N/A	inner membrane complex protein
PF3D7_0414700	N/A	GTP-binding protein, putative						PF3D7_1345700	IDH	isocitrate dehydrogenase [NADP], mitochondrial
PF3D7_0414900	ARO	armadillo-domain containing rhoptry protein						PF3D7_1345800	N/A	conserved Plasmodium protein, unknown function
PF3D7_0415100	N/A	conserved protein, unknown function						PF3D7_1346100	SEC61A	protein transport protein SEC61 subunit alpha
PF3D7_0415200	N/A	conserved Plasmodium protein, unknown function						PF3D7_1346400	N/A	VPS13 domain-containing protein, putative
PF3D7_0415300	CRK3	cdc2-related protein kinase 3						PF3D7_1347200	NT1	nucleoside transporter 1
PF3D7_0415500	CBP20	nuclear cap-binding protein subunit 2, putative						PF3D7_1347500	ALBA4	DNA/RNA-binding protein Alba 4
PF3D7_0415700	N/A	conserved Plasmodium protein, unknown function						PF3D7_1349200	N/A	glutamate--tRNA ligase, putative
PF3D7_0415800	N/A	PhIL1-interacting candidate PIC3						PF3D7_1351700	IMC1f	inner membrane complex protein 1f, putative
PF3D7_0416300	MCM9	DNA helicase MCM9, putative						PF3D7_1352500	N/A	thioredoxin-related protein, putative
PF3D7_0416600	PHBL	prohibitin-like protein PHBL, putative						PF3D7_1353200	MAHRP2	membrane associated histidine-rich protein 2
PF3D7_0416900	N/A	conserved Plasmodium protein, unknown function						PF3D7_1353700	ROMO1	reactive oxygen species modulator 1, putative
PF3D7_0417000	N/A	conserved Plasmodium protein, unknown function						PF3D7_1353800	N/A	proteasome subunit alpha type-4, putative
PF3D7_0417200	DHFR-TS	bifunctional dihydrofolate reductase-thymidylate synthase						PF3D7_1353900	N/A	proteasome subunit alpha type-7, putative
PF3D7_0417300	N/A	LETM1-like protein, putative						PF3D7_1354400	N/A	V-type proton ATPase 21 kDa proteolipid subunit, putative
PF3D7_0417400	N/A	conserved Plasmodium protein, unknown function						PF3D7_1356200	TIM23	mitochondrial import inner membrane translocase subunit TIM23, putative
PF3D7_0417700	N/A	conserved Plasmodium protein, unknown function						PF3D7_1357000	N/A	elongation factor 1-alpha
PF3D7_0417900	N/A	conserved Plasmodium protein, unknown function						PF3D7_1359600	N/A	conserved Plasmodium protein, unknown function
PF3D7_0418000	N/A	conserved Plasmodium protein, unknown function						PF3D7_1359900	N/A	conserved Plasmodium membrane protein, unknown function
PF3D7_0418100	SOC1	protein SOC1, putative						PF3D7_1360800	FLN	falcilysin
PF3D7_0418300	N/A	conserved Plasmodium protein, unknown function						PF3D7_1361500	N/A	PH domain-containing protein, putative
PF3D7_0418500	BET3	trafficking protein particle complex subunit 3, putative						PF3D7_1361900	PCNA1	proliferating cell nuclear antigen 1
PF3D7_0418600	N/A	regulator of chromosome condensation, putative						PF3D7_1362400	Pcalp	calpain
PF3D7_0418700	N/A	RNA-binding protein NOB1, putative						PF3D7_1364100	P92	6-cysteine protein P92
PF3D7_0418800	N/A	MOLO1 domain-containing protein, putative						PF3D7_1365700	N/A	SNARE associated Golgi protein, putative
PF3D7_0419100	N/A	conserved Plasmodium protein, unknown function						PF3D7_1367600	N/A	ribosome biogenesis protein MRT4, putative
PF3D7_0419200	GOT1	protein transport protein GOT1, putative						PF3D7_1370300	MAHRP1	membrane associated histidine-rich protein 1
PF3D7_0419300	N/A	conserved Plasmodium protein, unknown function						PF3D7_1401200	N/A	Plasmodium exported protein, unknown function
PF3D7_0419400	N/A	conserved Plasmodium protein, unknown function						PF3D7_1403600	Sel1	selenoprotein
PF3D7_0419500	N/A	conserved Plasmodium membrane protein, unknown function						PF3D7_1405600	RNR	ribonucleoside-diphosphate reductase small chain, putative
PF3D7_0419700	Pf34	apical merozoite protein						PF3D7_1406800	GAPM3	glideosome associated protein with multiple membrane spans 3
PF3D7_0419900	N/A	phosphatidylinositol 4-kinase, putative						PF3D7_1407100	NOP1	rRNA 2'-O-methyltransferase fibrillarin, putative
PF3D7_0420000	N/A	zinc finger protein, putative						PF3D7_1407200	N/A	conserved Plasmodium protein, unknown function
PF3D7_0420100	RIO2	serine/threonine protein kinase RIO2						PF3D7_1407800	PM4	plasmepsin IV
PF3D7_0420200	ACPS	holo-[acyl-carrier-protein] synthase, putative						PF3D7_1407900	PMI	plasmepsin I
PF3D7_0420300	ApiAP2	AP2 domain transcription factor, putative						PF3D7_1408000	PMII	plasmepsin II
PF3D7_0420500	N/A	conserved Plasmodium protein, unknown function						PF3D7_1408100	PMIII	plasmepsin III
PF3D7_0420600	N/A	conserved Plasmodium protein, unknown function						PF3D7_1408600	N/A	40S ribosomal protein S8e, putative
PF3D7_0420700	VAR	erythrocyte membrane protein 1, PfEMP1						PF3D7_1409400	N/A	conserved protein, unknown function
PF3D7_0420900	VAR	erythrocyte membrane protein 1, PfEMP1						PF3D7_1409600	N/A	histidine phosphatase, putative
PF3D7_0421100	VAR	erythrocyte membrane protein 1, PfEMP1						PF3D7_1410400	RAP1	rhoptry-associated protein 1
PF3D7_0421300	VAR	erythrocyte membrane protein 1, PfEMP1						PF3D7_1410600	eIF2gamma	eukaryotic translation initiation factor 2 subunit gamma, putative
PF3D7_0421700	N/A	conserved Plasmodium protein, unknown function						PF3D7_1410700	N/A	conserved protein, unknown function
PF3D7_0421800	N/A	conserved Plasmodium protein, unknown function						PF3D7_1411100	N/A	conserved Plasmodium membrane protein, unknown function
PF3D7_0421900	N/A	conserved Plasmodium protein, unknown function						PF3D7_1412800	NMT	glycylpeptide N-tetradecanoyltransferase
PF3D7_0422200	N/A	erythrocyte membrane-associated antigen						PF3D7_1413900	N/A	DnaJ protein, putative
PF3D7_0422300	N/A	alpha tubulin 2						PF3D7_1416500	GDH1	NADP-specific glutamate dehydrogenase
PF3D7_0422500	BRR2	pre-mRNA-splicing helicase BRR2, putative						PF3D7_1416600	N/A	conserved Plasmodium protein, unknown function
PF3D7_0422600	N/A	conserved Plasmodium protein, unknown function						PF3D7_1417500	CBF5	H/ACA ribonucleoprotein complex subunit 4, putative
PF3D7_0422700	EIF4A3	eukaryotic initiation factor 4A-III, putative						PF3D7_1419200	ATrx1	thioredoxin-like protein, putative
PF3D7_0422800	SR12	serpentine receptor 12, putative						PF3D7_1420700	P113	surface protein P113
PF3D7_0423200	N/A	BSD-domain protein, putative						PF3D7_1421900	CTR2	copper transporter, putative
PF3D7_0423500	GAPM2	glideosome associated protein with multiple membrane spans 2						PF3D7_1424100	RPL5	60S ribosomal protein L5, putative
PF3D7_0423800	CyRPA	cysteine-rich protective antigen						PF3D7_1426100	BTF3	transcription factor BTF3, putative
PF3D7_0424000	N/A	Plasmodium exported protein (PHISTc), unknown function						PF3D7_1429600	GEXP03	conserved Plasmodium protein, unknown function
PF3D7_0424400	SURF4.2	surface-associated interspersed protein 4.2 (SURFIN 4.2)						PF3D7_1432100	N/A	voltage-dependent anion-selective channel protein, putative
PF3D7_0424500	FIKK4.1	serine/threonine protein kinase, FIKK family						PF3D7_1434500	N/A	dynein-related AAA-type ATPase, putative
PF3D7_0425500	N/A	stevor						PF3D7_1434800	N/A	mitochondrial acidic protein MAM33, putative
PF3D7_0425800	VAR	erythrocyte membrane protein 1, PfEMP1						PF3D7_1436000	GPI	glucose-6-phosphate isomerase
PF3D7_0426000	VAR	erythrocyte membrane protein 1, PfEMP1						PF3D7_1437200	N/A	ribonucleoside-diphosphate reductase large subunit, putative
PF3D7_0500100	VAR	erythrocyte membrane protein 1, PfEMP1						PF3D7_1437900	HSP40	HSP40, subfamily A
PF3D7_0500500	RIF	rifin						PF3D7_1438100	SEC62	translocation protein SEC62, putative
PF3D7_0500800	MESA	mature parasite-infected erythrocyte surface antigen						PF3D7_1438900	Trx-Px1	thioredoxin peroxidase 1
PF3D7_0500900	FIKK5	serine/threonine protein kinase, FIKK family						PF3D7_1439000	CTR1	copper transporter
PF3D7_0501000	N/A	Plasmodium exported protein, unknown function						PF3D7_1439400	N/A	cytochrome b-c1 complex subunit Rieske, putative
PF3D7_0501300	SBP1	skeleton-binding protein 1						PF3D7_1439800	N/A	vesicle-associated membrane protein, putative
PF3D7_0501500	RAP3	rhoptry-associated protein 3						PF3D7_1439900	TIM	triosephosphate isomerase
PF3D7_0501600	RAP2	rhoptry-associated protein 2						PF3D7_1440500	N/A	allantoicase, putative
PF3D7_0501700	APC3	anaphase-promoting complex subunit 3, putative						PF3D7_1441400	FACT-S	FACT complex subunit SSRP1, putative
PF3D7_0501800	CAF1A	chromatin assembly factor 1 subunit A						PF3D7_1441500	N/A	conserved Plasmodium protein, unknown function
PF3D7_0502000	VPS11	vacuolar protein sorting-associated protein 11, putative						PF3D7_1442300	tRIP	tRNA import protein tRIP
PF3D7_0502300	N/A	conserved Plasmodium protein, unknown function						PF3D7_1444100	N/A	conserved Plasmodium protein, unknown function
PF3D7_0502500	N/A	conserved Plasmodium protein, unknown function						PF3D7_1444300	LPAAT	1-acyl-sn-glycerol-3-phosphate acyltransferase, putative
PF3D7_0502600	N/A	conserved Plasmodium protein, unknown function						PF3D7_1444800	FBPA	fructose-bisphosphate aldolase
PF3D7_0502700	N/A	conserved protein, unknown function						PF3D7_1446200	LAP	M17 leucyl aminopeptidase
PF3D7_0502800	N/A	DnaJ protein, putative						PF3D7_1446900	N/A	glutaminyl-peptide cyclotransferase, putative
PF3D7_0503100	IspE	4-diphosphocytidyl-2-C-methyl-D-erythritol kinase, putative						PF3D7_1447700	N/A	conserved protein, unknown function
PF3D7_0503200	CDC6	cell division control protein 6, putative						PF3D7_1447900	MDR2	multidrug resistance protein 2
PF3D7_0503600	MyoB	myosin B						PF3D7_1451100	eEF2	elongation factor 2
PF3D7_0504000	ATPase3	cation transporting P-ATPase						PF3D7_1451800	SORTLR	sortilin
PF3D7_0504100	N/A	AN1-type zinc finger protein, putative						PF3D7_1452000	RON2	rhoptry neck protein 2
PF3D7_0504500	N/A	MOLO1 domain-containing protein, putative						PF3D7_1452200	N/A	aminomethyltransferase, putative
PF3D7_0504600	BCKDHB	2-oxoisovalerate dehydrogenase subunit beta, mitochondrial, putative						PF3D7_1452500	STX6	syntaxin-6, putative
PF3D7_0504800	N/A	conserved Plasmodium protein, unknown function						PF3D7_1454400	APP	aminopeptidase P
PF3D7_0505000	N/A	MMS19-like protein, putative						PF3D7_1455300	N/A	conserved protein, unknown function
PF3D7_0505100	TRS85	trafficking protein particle complex subunit 8, putative						PF3D7_1455400	HlyIII	hemolysin III
PF3D7_0505300	N/A	UDP-N-acetylglucosamine transporter, putative						PF3D7_1456800	VP1	V-type H(+)-translocating pyrophosphatase, putative
PF3D7_0505500	MSH6	DNA mismatch repair protein MSH6, putative						PF3D7_1457000	SPP	signal peptide peptidase
PF3D7_0505700	N/A	conserved Plasmodium membrane protein, unknown function						PF3D7_1458000	FP1	cysteine proteinase falcipain 1
PF3D7_0506000	N/A	conserved Plasmodium protein, unknown function						PF3D7_1459400	N/A	conserved protein, unknown function
PF3D7_0506100	N/A	60S ribosomal subunit protein L24, putative						PF3D7_1459800	N/A	bax inhibitor 1, putative
PF3D7_0506500	N/A	conserved Plasmodium protein, unknown function						PF3D7_1460100	FCP	FYVE and coiled-coil domain-containing protein
PF3D7_0506700	N/A	GTPase-activating protein, putative						PF3D7_1460600	ISP3	inner membrane complex sub-compartment protein 3
PF3D7_0506900	ROM4	rhomboid protease ROM4						PF3D7_1460700	RPL27	60S ribosomal protein L27
PF3D7_0507000	N/A	conserved protein, unknown function						PF3D7_1461400	N/A	MORN repeat protein, putative
PF3D7_0507300	SOPT	subtilisin-like ookinete protein SOPT						PF3D7_1462300	N/A	GTP-binding protein, putative
PF3D7_0507400	SUB1-ProM	subtilisin propeptide-like protein						PF3D7_1462800	GAPDH	glyceraldehyde-3-phosphate dehydrogenase
PF3D7_0507500	SUB1	subtilisin-like protease 1						PF3D7_1463900	RON11	rhoptry neck protein 11, putative
PF3D7_0507700	NPL4	nuclear protein localization protein 4, putative						PF3D7_1468700	eIF4A	eukaryotic initiation factor 4A
PF3D7_0507900	N/A	conserved Plasmodium protein, unknown function						PF3D7_1470600	N/A	RAP protein, putative
PF3D7_0508000	P38	6-cysteine protein						PF3D7_1471100	EXP2	exported protein 2
PF3D7_0508200	N/A	longevity-assurance (LAG1) protein, putative						PF3D7_1471200	SulP	inorganic anion exchanger, inorganic anion antiporter
PF3D7_0508500	ND6	ND6 protein, putative						PF3D7_1471400	N/A	diacylglycerol kinase, putative
PF3D7_0508700	PRP5	pre-mRNA-processing ATP-dependent RNA helicase PRP5, putative						PF3D7_1477300	Pfg14-744	Plasmodium exported protein (PHIST), unknown function
PF3D7_0508900	AAP6	protein AAP6						PF3D7_1478600	PTP3	EMP1-trafficking protein
PF3D7_0509000	alphaSNAP	alpha-soluble NSF attachment protein, putative
PF3D7_0509100	SMC4	structural maintenance of chromosomes protein 4, putative
PF3D7_0509400	RNAPI	RNA polymerase I
PF3D7_0509500	N/A	ERCC4 domain-containing protein, putative
PF3D7_0509600	AsnRS	asparagine--tRNA ligase
PF3D7_0509800	PI4KB	phosphatidylinositol 4-kinase beta
PF3D7_0509900	N/A	NSE4 domain-containing protein, putative
PF3D7_0510000	N/A	conserved Plasmodium protein, unknown function
PF3D7_0510100	N/A	KH domain-containing protein, putative
PF3D7_0510200	CYP87	peptidyl-prolyl cis-trans isomerase
PF3D7_0510400	N/A	PDCD2 domain-containing protein, putative
PF3D7_0510500	TopoI	topoisomerase I
PF3D7_0511000	TCTP	translationally-controlled tumor protein homolog
PF3D7_0511100	N/A	conserved Plasmodium protein, unknown function
PF3D7_0511200	SCD	stearoyl-CoA desaturase
PF3D7_0511300	N/A	MORN repeat protein, putative
PF3D7_0511400	N/A	conserved Plasmodium protein, unknown function
PF3D7_0511500	N/A	RNA pseudouridylate synthase, putative
PF3D7_0511600	ARNP	apical rhoptry neck protein
PF3D7_0512000	PFD6	prefoldin subunit 6
PF3D7_0512200	GS	glutathione synthetase
PF3D7_0512300	MAT1	CDK-activating kinase assembly factor MAT1
PF3D7_0512500	N/A	conserved Plasmodium protein, unknown function
PF3D7_0512600	RAB1b	ras-related protein Rab-1B
PF3D7_0512700	OPRT	orotate phosphoribosyltransferase
PF3D7_0513000	N/A	conserved protein, unknown function
PF3D7_0513200	N/A	CPSF domain-containing protein, putative
PF3D7_0513600	N/A	deoxyribodipyrimidine photo-lyase, putative
PF3D7_0513700	PSOP12	secreted ookinete protein, putative
PF3D7_0514100	UvrD	ATP-dependent DNA helicase UvrD
PF3D7_0514200	N/A	conserved Plasmodium protein, unknown function
PF3D7_0514300	N/A	aspartate--tRNA ligase, putative
PF3D7_0514700	N/A	MORN repeat protein, putative
PF3D7_0514900	N/A	conserved Plasmodium protein, unknown function
PF3D7_0515000	CWC2	pre-mRNA-splicing factor CWC2, putative
PF3D7_0515100	ROM9	rhomboid protease ROM9
PF3D7_0515300	PI3K	phosphatidylinositol 3-kinase
PF3D7_0515500	GEP1	gametogenesis essential protein 1, putative
PF3D7_0516000	N/A	RAP protein, putative
PF3D7_0516100	ATPase1	cation-transporting ATPase 1
PF3D7_0516500	MFS1	major facilitator superfamily domain-containing protein, putative
PF3D7_0516700	N/A	ubiquitin carboxyl-terminal hydrolase 2, putative
PF3D7_0516800	ApiAP2	AP2 domain transcription factor AP2-O2, putative
PF3D7_0517100	N/A	conserved protein, unknown function
PF3D7_0517200	N/A	conserved Plasmodium protein, unknown function
PF3D7_0517400	FACT-L	FACT complex subunit SPT16, putative
PF3D7_0517500	N/A	UTP--glucose-1-phosphate uridylyltransferase, putative
PF3D7_0517600	CPbeta	F-actin-capping protein subunit beta, putative
PF3D7_0517700	EIF3B	eukaryotic translation initiation factor 3 subunit B, putative
PF3D7_0517800	DCX	apicortin
PF3D7_0518000	N/A	NOSIP domain-containing protein, putative
PF3D7_0518600	WDR26	WD repeat-containing protein 26, putative
PF3D7_0518700	PUF1	mRNA-binding protein PUF1
PF3D7_0518800	PSOP13	secreted ookinete protein, putative
PF3D7_0518900	N/A	conserved protein, unknown function
PF3D7_0519300	COX10	protoheme IX farnesyltransferase
PF3D7_0519500	CCR4-1	CCR4 domain-containing protein 1, putative
PF3D7_0519600	N/A	zinc finger protein, putative
PF3D7_0519900	N/A	conserved protein, unknown function
PF3D7_0520100	PPM9	protein phosphatase PPM9, putative
PF3D7_0520500	N/A	phosphomethylpyrimidine kinase, putative
PF3D7_0520600	Ap4AH	bis(5'-nucleosyl)-tetraphosphatase [asymmetrical]
PF3D7_0520800	N/A	conserved protein, unknown function
PF3D7_0520900	SAHH	adenosylhomocysteinase
PF3D7_0521100	N/A	conserved Plasmodium protein, unknown function
PF3D7_0521300	N/A	zinc finger protein, putative
PF3D7_0521700	DDX1	ATP-dependent RNA helicase DDX1, putative
PF3D7_0521800	N/A	AFG1-like ATPase, putative
PF3D7_0522100	N/A	conserved Plasmodium protein, unknown function
PF3D7_0522400	N/A	conserved Plasmodium protein, unknown function
PF3D7_0522500	RPL17	50S ribosomal protein L17, apicoplast, putative
PF3D7_0522600	N/A	magnesium transporter NIPA, putative
PF3D7_0522700	SufA	iron-sulfur cluster assembly protein SufA
PF3D7_0522800	BUD31	pre-mRNA-splicing factor BUD31, putative
PF3D7_0522900	N/A	zinc finger protein, putative
PF3D7_0523000	MDR1	multidrug resistance protein 1
PF3D7_0523200	N/A	heptatricopeptide repeat-containing protein, putative
PF3D7_0523700	N/A	conserved Plasmodium membrane protein, unknown function
PF3D7_0523800	N/A	divalent metal transporter, putative
PF3D7_0523900	N/A	MerC domain-containing protein, putative
PF3D7_0524000	KASbeta	karyopherin beta
PF3D7_0524100	N/A	conserved Plasmodium protein, unknown function
PF3D7_0524200	N/A	conserved Plasmodium membrane protein, unknown function
PF3D7_0524600	N/A	50S ribosomal protein L12, apicoplast, putative
PF3D7_0524800	UFD1	ubiquitin fusion degradation protein 1, putative
PF3D7_0524900	TYW1	S-adenosyl-L-methionine-dependent tRNA 4-demethylwyosine synthase, putative
PF3D7_0525100	ACS10	acyl-CoA synthetase
PF3D7_0525500	N/A	WD repeat-containing protein, putative
PF3D7_0525600	N/A	RNA methyltransferase, putative
PF3D7_0525800	IMC1g	inner membrane complex protein 1g, putative
PF3D7_0526000	N/A	RAP protein, putative
PF3D7_0526100	N/A	conserved Plasmodium membrane protein, unknown function
PF3D7_0526300	WDR55	WD repeat-containing protein 55, putative
PF3D7_0526500	N/A	conserved Plasmodium protein, unknown function
PF3D7_0526600	N/A	conserved Plasmodium protein, unknown function
PF3D7_0527400	N/A	conserved Plasmodium protein, unknown function
PF3D7_0527500	HIP	Hsc70-interacting protein
PF3D7_0528100	N/A	AP-1/2 complex subunit beta, putative
PF3D7_0528400	DHHC7	palmitoyltransferase DHHC7
PF3D7_0528500	CPalpha	F-actin-capping protein subunit alpha, putative
PF3D7_0528700	CYP23	peptidyl-prolyl cis-trans isomerase
PF3D7_0528800	N/A	nuclear GTP-binding protein, putative
PF3D7_0528900	N/A	conserved protein, unknown function
PF3D7_0529000	TIP	T-cell immunomodulatory protein homolog, putative
PF3D7_0529100	ATrx2	thioredoxin-like protein, putative
PF3D7_0529200	N/A	sugar transporter, putative
PF3D7_0529300	TIC22	apicoplast TIC22 protein
PF3D7_0529800	N/A	conserved Plasmodium protein, unknown function
PF3D7_0530400	N/A	conserved Plasmodium protein, unknown function
PF3D7_0530500	N/A	conserved Plasmodium membrane protein, unknown function
PF3D7_0530700	N/A	conserved Plasmodium protein, unknown function
PF3D7_0530800	N/A	CPW-WPC family protein
PF3D7_0530900	FRM1	formin 1
PF3D7_0531100	N/A	conserved Plasmodium protein, unknown function
PF3D7_0531200	N/A	ribosomal protein S16, mitochondrial, putative
PF3D7_0532200	N/A	Plasmodium exported protein (PHISTc), unknown function
PF3D7_0532300	N/A	Plasmodium exported protein (PHISTb), unknown function
PF3D7_0532900	RIF	rifin
PF3D7_0600200	VAR	erythrocyte membrane protein 1, PfEMP1
PF3D7_0600500	RIF	rifin
PF3D7_0600600	VAR	erythrocyte membrane protein 1 (PfEMP1), exon 2
PF3D7_0601000	EPF4	exported protein family 4
PF3D7_0601200	MC-2TM	Pfmc-2TM Maurer's cleft two transmembrane protein
PF3D7_0601500	N/A	Plasmodium exported protein (PHISTb), unknown function
PF3D7_0601600	N/A	tetratricopeptide repeat protein, putative
PF3D7_0602000	N/A	zinc finger protein, putative
PF3D7_0602100	MTR4	ATP-dependent RNA helicase MTR4
PF3D7_0602200	N/A	MYND-type zinc finger protein, putative
PF3D7_0602300	PALM	liver merozoite formation protein, putative
PF3D7_0602400	EF-G	elongation factor G
PF3D7_0602700	N/A	conserved Plasmodium protein, unknown function
PF3D7_0602900	N/A	conserved Plasmodium protein, unknown function
PF3D7_0603000	N/A	SDE2 domain-containing protein, putative
PF3D7_0603300	DHODH	dihydroorotate dehydrogenase
PF3D7_0603600	N/A	AT-rich interactive domain-containing protein, putative
PF3D7_0603800	CEP76	NdP2 protein, putative
PF3D7_0603900	N/A	conserved Plasmodium protein, unknown function
PF3D7_0604000	N/A	conserved Plasmodium protein, unknown function
PF3D7_0604100	SIP2	AP2 domain transcription factor
PF3D7_0604400	N/A	conserved protein, unknown function
PF3D7_0604500	N/A	GYF domain-containing protein, putative
PF3D7_0604600	N/A	DNA helicase, putative
PF3D7_0604700	GILP	glyoxalase I-like protein GILP
PF3D7_0604800	N/A	RAP protein, putative
PF3D7_0605300	ARK1	serine/threonine protein kinase ARK1
PF3D7_0605800	RAD50	DNA repair protein RAD50, putative
PF3D7_0605900	N/A	elongation of fatty acids protein, putative
PF3D7_0606100	N/A	RNA-binding protein, putative
PF3D7_0606500	PTB	polypyrimidine tract-binding protein, putative
PF3D7_0606600	N/A	conserved Plasmodium protein, unknown function
PF3D7_0606700	N/A	coatomer alpha subunit, putative
PF3D7_0606800	VFT1	VFT protein
PF3D7_0607200	N/A	RING zinc finger protein, putative
PF3D7_0607300	UROD	uroporphyrinogen III decarboxylase
PF3D7_0607400	N/A	G-protein associated signal transduction protein, putative
PF3D7_0607500	COQ2	4-hydroxybenzoate polyprenyltransferase, putative
PF3D7_0607600	SAS6	spindle assembly abnormal protein 6, putative
PF3D7_0607700	N/A	conserved Plasmodium protein, unknown function
PF3D7_0607900	N/A	conserved Plasmodium protein, unknown function
PF3D7_0608000	DPH7	diphthine methyltransferase, putative
PF3D7_0608100	N/A	conserved Plasmodium protein, unknown function
PF3D7_0608200	N/A	conserved Plasmodium protein, unknown function
PF3D7_0608300	N/A	heptatricopeptide repeat-containing protein, putative
PF3D7_0608310	SAM50	sorting assembly machinery 50 kDa subunit, putative
PF3D7_0608600	N/A	conserved Plasmodium protein, unknown function
PF3D7_0608700	CCT6	T-complex protein 1 subunit zeta
PF3D7_0608900	N/A	conserved Plasmodium protein, unknown function
PF3D7_0609000	NUP637	nucleoporin NUP637, putative
PF3D7_0609100	ZIP1	zinc transporter ZIP1, putative
PF3D7_0609200	N/A	citrate synthase-like protein, putative
PF3D7_0609300	N/A	conserved Plasmodium protein, unknown function
PF3D7_0609500	N/A	conserved Plasmodium protein, unknown function
PF3D7_0609600	N/A	conserved Plasmodium protein, unknown function
PF3D7_0609700	KIC6	protein KIC6
PF3D7_0609800	DHHC2	palmitoyltransferase DHHC2, putative
PF3D7_0609900	N/A	conserved Plasmodium protein, unknown function
PF3D7_0610000	N/A	ribosomal protein L19, mitochondrial, putative
PF3D7_0610100	SLU7	pre-mRNA-splicing factor SLU7, putative
PF3D7_0610200	RBM25	RNA-binding protein 25, putative
PF3D7_0610700	N/A	conserved Plasmodium protein, unknown function
PF3D7_0611200	AP2-EXP2	AP2 domain transcription factor AP2-EXP2
PF3D7_0611400	SWIB	SWI/SNF-related matrix-associated actin-dependent regulator of chromatin
PF3D7_0611700	RPL39	60S ribosomal protein L39
PF3D7_0611800	N/A	conserved Plasmodium protein, unknown function
PF3D7_0612100	EIF3L	eukaryotic translation initiation factor 3 subunit L, putative
PF3D7_0612200	LRR6	leucine-rich repeat protein
PF3D7_0612300	TMEM234	transmembrane protein 234, putative
PF3D7_0612400	N/A	conserved Plasmodium protein, unknown function
PF3D7_0612600	NCS6	cytoplasmic tRNA 2-thiolation protein 1, putative
PF3D7_0612700	P12	6-cysteine protein P12
PF3D7_0612800	P12p	6-cysteine protein P12p
PF3D7_0612900	NOG1	nucleolar GTP-binding protein 1, putative
PF3D7_0613000	N/A	conserved Plasmodium protein, unknown function
PF3D7_0613200	N/A	conserved Plasmodium protein, unknown function
PF3D7_0613600	N/A	conserved Plasmodium protein, unknown function
PF3D7_0613700	N/A	syntaxin-binding protein, putative
PF3D7_0613800	ApiAP2	AP2 domain transcription factor, putative
PF3D7_0613900	MyoE	myosin E, putative
PF3D7_0614200	NAR1	cytosolic Fe-S cluster assembly factor NAR1, putative
PF3D7_0614300	MFR1	major facilitator superfamily-related transporter, putative
PF3D7_0614500	RPL19	60S ribosomal protein L19
PF3D7_0614600	N/A	conserved Plasmodium protein, unknown function
PF3D7_0614900	N/A	conserved Plasmodium membrane protein, unknown function
PF3D7_0615100	ENR	enoyl-acyl carrier reductase
PF3D7_0615300	GWT1	GPI-anchored wall transfer protein 1, putative
PF3D7_0615400	N/A	ribonuclease, putative
PF3D7_0615500	CRK5	cdc2-related protein kinase 5
PF3D7_0615600	N/A	zinc finger protein, putative
PF3D7_0615900	N/A	protein phosphatase, putative
PF3D7_0616300	N/A	conserved Plasmodium protein, unknown function
PF3D7_0616400	N/A	conserved Plasmodium protein, unknown function
PF3D7_0616500	TLP	TRAP-like protein
PF3D7_0616600	N/A	conserved protein, unknown function
PF3D7_0616800	MQO	malate:quinone oxidoreductase
PF3D7_0617000	TOM40	mitochondrial import receptor subunit TOM40, putative
PF3D7_0617100	N/A	AP-2 complex subunit alpha, putative
PF3D7_0617400	VAR	erythrocyte membrane protein 1, PfEMP1
PF3D7_0618000	N/A	conserved Plasmodium membrane protein, unknown function
PF3D7_0618100	N/A	conserved Plasmodium protein, unknown function
PF3D7_0618500	MDH	malate dehydrogenase
PF3D7_0618800	N/A	heptatricopeptide repeat-containing protein, putative
PF3D7_0618900	GPI1	phosphatidylinositol N-acetylglucosaminyltransferase subunit GPI1
PF3D7_0619000	N/A	FPL domain-containing protein, putative
PF3D7_0619300	N/A	conserved Plasmodium protein, unknown function
PF3D7_0619500	ACS12	acyl-CoA synthetase
PF3D7_0619600	N/A	conserved Plasmodium protein, unknown function
PF3D7_0619800	N/A	conserved Plasmodium membrane protein, unknown function
PF3D7_0619900	SF3A2	splicing factor 3A subunit 2, putative
PF3D7_0620300	N/A	conserved Plasmodium protein, unknown function
PF3D7_0620400	MSP10	merozoite surface protein 10
PF3D7_0620500	N/A	cleavage stimulation factor subunit 1, putative
PF3D7_0620600	N/A	conserved Plasmodium protein, unknown function
PF3D7_0620700	N/A	DnaJ protein, putative
PF3D7_0621000	N/A	conserved Plasmodium protein, unknown function
PF3D7_0621100	N/A	conserved Plasmodium protein, unknown function
PF3D7_0621200	PDX1	pyridoxine biosynthesis protein PDX1
PF3D7_0621300	PUF3	mRNA-binding protein PUF3
PF3D7_0621350	SYS1	protein SYS1, putative
PF3D7_0621400	ALV7	Pf77 protein
PF3D7_0621700	N/A	RAP protein, putative
PF3D7_0621800	N/A	nascent polypeptide-associated complex subunit alpha, putative
PF3D7_0622100	N/A	conserved Plasmodium protein, unknown function
PF3D7_0622200	MIAB	tRNA-2-methylthio-N(6)-dimethylallyladenosine synthase
PF3D7_0622800	N/A	leucine--tRNA ligase, putative
PF3D7_0622900	AP2Tel	AP2 domain transcription factor AP2Tel
PF3D7_0623100	NAB2	nuclear polyadenylated RNA-binding protein NAB2, putative
PF3D7_0623200	FNR	ferredoxin--NADP reductase
PF3D7_0623300	N/A	EGF-like membrane protein, putative
PF3D7_0623500	SOD2	superoxide dismutase [Fe]
PF3D7_0623600	N/A	splicing factor-like protein 1, putative
PF3D7_0623700	SUV3	ATP-dependent RNA helicase SUV3, putative
PF3D7_0623800	TKL4	tyrosine kinase-like protein, putative
PF3D7_0624000	HK	hexokinase
PF3D7_0624300	N/A	CPW-WPC family protein
PF3D7_0624400	N/A	conserved protein, unknown function
PF3D7_0624500	APC11	anaphase-promoting complex subunit 11, putative
PF3D7_0624600	ISWI	ISWI chromatin-remodeling complex ATPase
PF3D7_0625000	SMS1	sphingomyelin synthase 1, putative
PF3D7_0625100	SMS2	sphingomyelin synthase 2, putative
PF3D7_0625300	MtDNAP	mitochondrial DNA polymerase
PF3D7_0625400	N/A	conserved Plasmodium protein, unknown function
PF3D7_0625700	N/A	conserved protein, unknown function
PF3D7_0626000	N/A	conserved Plasmodium protein, unknown function
PF3D7_0626200	N/A	conserved Plasmodium protein, unknown function
PF3D7_0626400	N/A	CRAL/TRIO domain-containing protein, putative
PF3D7_0626800	PyrK	pyruvate kinase
PF3D7_0627000	N/A	conserved Plasmodium protein, unknown function
PF3D7_0627100	N/A	ankyrin-repeat protein, putative
PF3D7_0627300	RNF5	E3 ubiquitin-protein ligase RNF5, putative
PF3D7_0627600	N/A	conserved Plasmodium protein, unknown function
PF3D7_0627700	N/A	transportin
PF3D7_0627800	ACAS	acetyl-CoA synthetase
PF3D7_0628100	HECT1	HECT domain-containing protein 1, putative
PF3D7_0628200	PK4	eukaryotic translation initiation factor 2-alpha kinase
PF3D7_0628300	CEPT	choline/ethanolaminephosphotransferase, putative
PF3D7_0628400	N/A	protease, putative
PF3D7_0628500	N/A	conserved Plasmodium protein, unknown function
PF3D7_0628800	GATB	glutamyl-tRNA(Gln) amidotransferase subunit B
PF3D7_0628900	N/A	RAP protein, putative
PF3D7_0629200	N/A	DnaJ protein, putative
PF3D7_0629700	SET1	SET domain protein, putative
PF3D7_0629800	N/A	cullin-2, putative
PF3D7_0630100	N/A	alpha/beta hydrolase, putative
PF3D7_0630200	PSOP6	secreted ookinete protein, putative
PF3D7_0630300	N/A	DNA polymerase epsilon catalytic subunit A, putative
PF3D7_0630600	N/A	deubiquitinating enzyme MINDY, putative
PF3D7_0630700	N/A	bifunctional methylenetetrahydrofolate dehydrogenase/cyclohydrolase, putative
PF3D7_0630800	N/A	TPH domain-containing protein, putative
PF3D7_0630900	HAS1	ATP-dependent RNA helicase HAS1
PF3D7_0631000	N/A	tetratricopeptide repeat protein, putative
PF3D7_0631100	N/A	Plasmodium exported protein (PHISTb), unknown function
PF3D7_0631400	MC-2TM	Pfmc-2TM Maurer's cleft two transmembrane protein
PF3D7_0631600	EPF4	exported protein family 4
PF3D7_0631800	RIF	rifin
PF3D7_0632300	RIF	rifin
PF3D7_0632500	VAR	erythrocyte membrane protein 1, PfEMP1
PF3D7_0632800	VAR	erythrocyte membrane protein 1, PfEMP1
PF3D7_0700100	VAR	erythrocyte membrane protein 1, PfEMP1
PF3D7_0700500	RIF	rifin
PF3D7_0700800	MC-2TM	Pfmc-2TM Maurer's cleft two transmembrane protein
PF3D7_0701600	MC-2TM	Pfmc-2TM Maurer's cleft two transmembrane protein
PF3D7_0701900	N/A	Plasmodium exported protein, unknown function
PF3D7_0702200	LPL20	lysophospholipase LPL20
PF3D7_0702500	N/A	Plasmodium exported protein, unknown function
PF3D7_0703000	N/A	conserved Plasmodium protein, unknown function
PF3D7_0703200	N/A	conserved Plasmodium protein, unknown function
PF3D7_0703400	N/A	conserved Plasmodium protein, unknown function
PF3D7_0703500	N/A	erythrocyte membrane-associated antigen
PF3D7_0703800	N/A	conserved Plasmodium protein, unknown function
PF3D7_0703900	N/A	conserved Plasmodium membrane protein, unknown function
PF3D7_0704000	N/A	conserved Plasmodium membrane protein, unknown function
PF3D7_0704100	BTP2	basal complex transmembrane protein 2
PF3D7_0704200	NSUN1	RNA cytosine C(5)-methyltransferase, putative
PF3D7_0704400	N/A	phosphoinositide-binding protein, putative
PF3D7_0704500	N/A	serine/threonine protein kinase, putative
PF3D7_0704600	UT	HECT-type E3 ubiquitin ligase UT
PF3D7_0704700	PPAT	phosphopantetheine adenylyltransferase, putative
PF3D7_0704800	PPM12	protein phosphatase PPM12, putative
PF3D7_0705000	N/A	mRNA cap guanine-N7 methyltransferase, putative
PF3D7_0705200	N/A	conserved Plasmodium protein, unknown function
PF3D7_0705400	MCM7	DNA replication licensing factor MCM7
PF3D7_0705500	N/A	inositol-phosphate phosphatase, putative
PF3D7_0705700	N/A	40S ribosomal protein S29, putative
PF3D7_0705800	CRISP	cysteine-rich secretory protein
PF3D7_0706000	N/A	importin-7, putative
PF3D7_0706100	N/A	conserved Plasmodium protein, unknown function
PF3D7_0706400	RPL37	60S ribosomal protein L37
PF3D7_0706500	N/A	conserved Plasmodium protein, unknown function
PF3D7_0706600	N/A	conserved Plasmodium protein, unknown function
PF3D7_0706700	MSH2-2	DNA mismatch repair protein MSH2, putative
PF3D7_0707200	N/A	conserved Plasmodium protein, unknown function
PF3D7_0707500	N/A	conserved Plasmodium protein, unknown function
PF3D7_0707700	N/A	E3 ubiquitin-protein ligase, putative
PF3D7_0708000	N/A	cytoskeleton associated protein, putative
PF3D7_0708100	RPB10	DNA-directed RNA polymerases I, II, and III subunit RPABC5, putative
PF3D7_0708200	N/A	conserved Plasmodium protein, unknown function
PF3D7_0708300	BUD32	EKC/KEOPS complex subunit BUD32
PF3D7_0708400	HSP90	heat shock protein 90
PF3D7_0708600	IMC1d	inner membrane complex protein 1d, putative
PF3D7_0708900	SCO1	protein SCO1, putative
PF3D7_0709100	N/A	Cg1 protein
PF3D7_0709200	GLP3	glutaredoxin-like protein
PF3D7_0709400	N/A	Cg7 protein
PF3D7_0709600	POP1	ribonucleases P/MRP protein subunit POP1, putative
PF3D7_0709800	N/A	conserved protein, unknown function
PF3D7_0709900	N/A	hydrolase, putative
PF3D7_0710000	N/A	conserved Plasmodium protein, unknown function
PF3D7_0710200	N/A	conserved Plasmodium protein, unknown function
PF3D7_0710300	N/A	conserved protein, unknown function
PF3D7_0710500	N/A	conserved protein, unknown function
PF3D7_0710800	USE1	protein transport protein USE1, putative
PF3D7_0710900	RPL1	50S ribosomal protein L1, mitochondrial, putative
PF3D7_0711100	N/A	conserved protein, unknown function
PF3D7_0711200	N/A	conserved Plasmodium protein, unknown function
PF3D7_0711500	N/A	regulator of chromosome condensation, putative
PF3D7_0711700	VAR	erythrocyte membrane protein 1, PfEMP1
PF3D7_0712000	VAR	erythrocyte membrane protein 1, PfEMP1
PF3D7_0712600	VAR	erythrocyte membrane protein 1, PfEMP1
PF3D7_0712900	VAR	erythrocyte membrane protein 1, PfEMP1
PF3D7_0713000	RIF	rifin
PF3D7_0713100	MC-2TM	Pfmc-2TM Maurer's cleft two transmembrane protein
PF3D7_0713400	SR25	GPCR-like receptor SR25
PF3D7_0713500	N/A	conserved Plasmodium protein, unknown function
PF3D7_0713600	N/A	ribosomal protein S5, mitochondrial, putative
PF3D7_0713700	N/A	conserved Plasmodium protein, unknown function
PF3D7_0713800	NELFA	negative elongation factor A, putative
PF3D7_0713900	N/A	conserved Plasmodium protein, unknown function
PF3D7_0714300	DHHC4	palmitoyltransferase DHHC4, putative
PF3D7_0714600	N/A	conserved protein, unknown function
PF3D7_0715000	PNPase	4-nitrophenylphosphatase
PF3D7_0715200	N/A	conserved Plasmodium protein, unknown function
PF3D7_0715400	PSOP20	secreted ookinete protein, putative
PF3D7_0715500	N/A	ATP synthase subunit epsilon, mitochondrial, putative
PF3D7_0715800	DMT1	drug/metabolite transporter DMT1, putative
PF3D7_0715900	CDF	cation diffusion facilitator family protein, putative
PF3D7_0716100	SDA1	protein SDA1, putative
PF3D7_0716200	N/A	PDCD2 domain-containing protein, putative
PF3D7_0716300	N/A	conserved protein, unknown function
PF3D7_0716400	N/A	transcription initiation factor IIA subunit 1, putative
PF3D7_0716600	SufS	cysteine desulfurase
PF3D7_0716700	N/A	conserved Plasmodium protein, unknown function
PF3D7_0716900	DMT2	drug/metabolite transporter DMT2
PF3D7_0717100	N/A	CRAL/TRIO domain-containing protein, putative
PF3D7_0717400	N/A	queuine tRNA-ribosyltransferase, putative
PF3D7_0717600	IMC32	inner membrane complex protein, putative
PF3D7_0717700	N/A	serine--tRNA ligase, putative
PF3D7_0717800	N/A	conserved Plasmodium protein, unknown function
PF3D7_0717900	N/A	thioredoxin-like protein
PF3D7_0718000	N/A	dynein heavy chain, putative
PF3D7_0718100	EST	exported serine/threonine protein kinase
PF3D7_0718300	CRMP2	cysteine repeat modular protein 2
PF3D7_0718400	N/A	ribosomal protein S8, mitochondrial, putative
PF3D7_0718700	N/A	conserved Plasmodium membrane protein, unknown function
PF3D7_0718900	N/A	conserved Plasmodium protein, unknown function
PF3D7_0719000	N/A	conserved protein, unknown function
PF3D7_0719100	N/A	ATP synthase F0 subunit a-like protein, putative
PF3D7_0719400	N/A	conserved Plasmodium protein, unknown function
PF3D7_0719600	N/A	60S ribosomal protein L11a, putative
PF3D7_0719800	N/A	conserved protein, unknown function
PF3D7_0719900	N/A	conserved Plasmodium membrane protein, unknown function
PF3D7_0720200	N/A	conserved protein, unknown function
PF3D7_0720700	PX1	phosphoinositide-binding protein PX1
PF3D7_0720900	N/A	tetratricopeptide repeat protein, putative
PF3D7_0721000	N/A	conserved Plasmodium membrane protein, unknown function
PF3D7_0721100	N/A	conserved protein, unknown function
PF3D7_0721200	N/A	conserved Plasmodium protein, unknown function
PF3D7_0721500	N/A	conserved Plasmodium membrane protein, unknown function
PF3D7_0721700	PSOP1	secreted ookinete protein, putative
PF3D7_0721900	N/A	V-type ATPase V0 subunit e, putative
PF3D7_0722200	RALP1	rhoptry-associated leucine zipper-like protein 1
PF3D7_0722300	N/A	ubiquitin carboxyl-terminal hydrolase, putative
PF3D7_0722800	N/A	conserved protein, unknown function
PF3D7_0722900	N/A	conserved protein, unknown function
PF3D7_0723200	N/A	conserved Plasmodium protein, unknown function
PF3D7_0723400	N/A	conserved Plasmodium protein, unknown function
PF3D7_0723500	N/A	dynactin subunit 5, putative
PF3D7_0723600	N/A	proteasome assembly chaperone 4, putative
PF3D7_0723800	N/A	conserved Plasmodium protein, unknown function
PF3D7_0724000	N/A	Rab GTPase activator and protein kinase, putative
PF3D7_0724600	N/A	protein kinase, putative
PF3D7_0724700	BDP6	bromodomain protein 6, putative
PF3D7_0724800	N/A	kelch domain-containing protein, putative
PF3D7_0724900	N/A	kinesin-20, putative
PF3D7_0725000	N/A	exonuclease I, putative
PF3D7_0725100	N/A	conserved Plasmodium membrane protein, unknown function
PF3D7_0725300	N/A	conserved protein, unknown function
PF3D7_0725400	N/A	conserved Plasmodium protein, unknown function
PF3D7_0726100	N/A	Plasmodium exported protein, unknown function
PF3D7_0726300	PMS1	DNA mismatch repair protein PMS1, putative
PF3D7_0726400	N/A	conserved Plasmodium membrane protein, unknown function
PF3D7_0726500	N/A	ubiquitin carboxyl-terminal hydrolase, putative
PF3D7_0726600	N/A	conserved Plasmodium protein, unknown function
PF3D7_0726700	N/A	conserved Plasmodium protein, unknown function
PF3D7_0726900	TIM50	mitochondrial import inner membrane translocase subunit TIM50, putative
PF3D7_0727300	DNMT	DNA (cytosine-5)-methyltransferase
PF3D7_0727500	N/A	mTERF domain-containing protein, putative
PF3D7_0727600	N/A	conserved Plasmodium protein, unknown function
PF3D7_0727700	N/A	conserved Plasmodium protein, unknown function
PF3D7_0727800	N/A	cation transporting ATPase, putative
PF3D7_0727900	N/A	conserved Plasmodium protein, unknown function
PF3D7_0728000	eIF2alpha	eukaryotic translation initiation factor 2 subunit alpha
PF3D7_0728100	N/A	anaphase-promoting complex subunit 1, putative
PF3D7_0728200	ALP3	actin-like protein, putative
PF3D7_0728300	N/A	conserved protein, unknown function
PF3D7_0728500	N/A	EF hand domain-containing protein, putative
PF3D7_0728600	N/A	RING zinc finger protein, putative
PF3D7_0728800	N/A	conserved Plasmodium protein, unknown function
PF3D7_0729100	N/A	allantoicase, putative
PF3D7_0729200	AOP	1-cys peroxiredoxin
PF3D7_0729300	NMD3	60S ribosomal export protein NMD3, putative
PF3D7_0729400	N/A	ribosome biogenesis protein BRX1, putative
PF3D7_0729500	MT-A70	N6-adenosine-methyltransferase MT-A70
PF3D7_0729800	N/A	dynein light chain, putative
PF3D7_0729900	N/A	dynein heavy chain, putative
PF3D7_0730500	N/A	conserved Plasmodium protein, unknown function
PF3D7_0730800	N/A	Plasmodium exported protein, unknown function
PF3D7_0731300	PfG174	Plasmodium exported protein (PHISTb), unknown function
PF3D7_0731500	EBA175	erythrocyte binding antigen-175
PF3D7_0731600	ACS5	acyl-CoA synthetase
PF3D7_0731700	N/A	Plasmodium exported protein (hyp9), unknown function
PF3D7_0731800	GEXP08	alpha/beta hydrolase, putative
PF3D7_0732200	RIF	rifin
PF3D7_0732300	RIF	rifin
PF3D7_0732400	RIF	rifin
PF3D7_0732500	RIF	rifin
PF3D7_0732700	RIF	rifin
PF3D7_0733000	VAR	erythrocyte membrane protein 1, PfEMP1
PF3D7_0800100	VAR	erythrocyte membrane protein 1, PfEMP1
PF3D7_0800200	VAR	erythrocyte membrane protein 1, PfEMP1
PF3D7_0800300	VAR	erythrocyte membrane protein 1, PfEMP1
PF3D7_0800800	N/A	Plasmodium exported protein (hyp7), unknown function
PF3D7_0801300	WARP	von Willebrand factor A domain-related protein
PF3D7_0801400	N/A	conserved Plasmodium protein, unknown function
PF3D7_0801700	SENP2	sentrin-specific protease 2, putative
PF3D7_0801800	N/A	mannose-6-phosphate isomerase, putative
PF3D7_0801900	LSD2	lysine-specific histone demethylase, putative
PF3D7_0802000	GDH3	glutamate dehydrogenase, putative
PF3D7_0802100	AP2-LT	AP2 domain transcription factor AP2-LT
PF3D7_0802200	1-CysPxn	1-cys peroxiredoxin
PF3D7_0802300	PWP2	periodic tryptophan protein 2, putative
PF3D7_0802400	N/A	cyclin-like protein, putative
PF3D7_0802500	N/A	inositol 5-phosphatase, putative
PF3D7_0802600	ACbeta	adenylyl cyclase beta
PF3D7_0803400	RAD54	DNA repair and recombination protein RAD54, putative
PF3D7_0803500	N/A	AAA family ATPase, putative
PF3D7_0803700	g-tub	tubulin gamma chain
PF3D7_0804300	N/A	zinc finger protein, putative
PF3D7_0804400	METAP1c	methionine aminopeptidase 1c, putative
PF3D7_0804500	N/A	conserved Plasmodium membrane protein, unknown function
PF3D7_0804600	N/A	tRNA pseudouridine synthase, putative
PF3D7_0804700	N/A	conserved Plasmodium protein, unknown function
PF3D7_0805000	N/A	alpha/beta hydrolase, putative
PF3D7_0805100	N/A	conserved protein, unknown function
PF3D7_0805300	N/A	zinc finger protein, putative
PF3D7_0805500	N/A	conserved Plasmodium protein, unknown function
PF3D7_0805700	FIKK8	serine/threonine protein kinase, FIKK family
PF3D7_0805800	N/A	conserved Plasmodium protein, unknown function
PF3D7_0805900	N/A	conserved protein, unknown function
PF3D7_0806000	N/A	AAA family ATPase, putative
PF3D7_0806100	N/A	conserved Plasmodium protein, unknown function
PF3D7_0806200	DPY19	Dpy-19-like C-mannosyltransferase
PF3D7_0806300	FLP	ferlin-like protein, putative
PF3D7_0806400	ALG13	UDP-N-acetylglucosamine transferase subunit ALG13, putative
PF3D7_0806700	N/A	conserved Plasmodium membrane protein, unknown function
PF3D7_0806800	N/A	V-type proton ATPase subunit a, putative
PF3D7_0806900	N/A	conserved protein, unknown function
PF3D7_0807100	PSH3	DNA helicase PSH3
PF3D7_0807200	N/A	conserved Plasmodium membrane protein, unknown function
PF3D7_0807300	RAB18	ras-related protein Rab-18
PF3D7_0807600	N/A	conserved Plasmodium protein, unknown function
PF3D7_0807700	DegP	serine protease DegP
PF3D7_0807800	RPN10	26S proteasome regulatory subunit RPN10, putative
PF3D7_0808000	N/A	conserved Plasmodium protein, unknown function
PF3D7_0808100	N/A	AP-3 complex subunit delta, putative
PF3D7_0808200	PMX	plasmepsin X
PF3D7_0808600	VAR	erythrocyte membrane protein 1, PfEMP1
PF3D7_0808700	VAR	erythrocyte membrane protein 1, PfEMP1
PF3D7_0808800	RIF	rifin
PF3D7_0809100	VAR	erythrocyte membrane protein 1, PfEMP1
PF3D7_0809200	pfa55-14	asparagine-rich antigen Pfa55-14
PF3D7_0809250	C4AP5	respiratory chain complex 4 associated protein 5
PF3D7_0809400	N/A	conserved protein, unknown function
PF3D7_0809500	N/A	histone acetyltransferase subunit NuA4, putative
PF3D7_0809600	N/A	peptidase family C50, putative
PF3D7_0809800	N/A	conserved Plasmodium protein, unknown function
PF3D7_0809900	JmjC1	JmjC domain-containing protein 1, putative
PF3D7_0810100	N/A	ribosomal protein L33, apicoplast, putative
PF3D7_0810700	N/A	conserved Plasmodium protein, unknown function
PF3D7_0810900	N/A	conserved Plasmodium protein, unknown function
PF3D7_0811000	CUL1	cullin-1, putative
PF3D7_0811400	N/A	conserved protein, unknown function
PF3D7_0811500	CARM1	histone-arginine methyltransferase CARM1, putative
PF3D7_0811600	N/A	conserved protein, unknown function
PF3D7_0811700	N/A	conserved Plasmodium protein, unknown function
PF3D7_0812000	N/A	conserved protein, unknown function
PF3D7_0812100	N/A	proteasome activator complex subunit 4, putative
PF3D7_0812200	N/A	trypsin-like serine protease, putative
PF3D7_0812500	N/A	RNA-binding protein, putative
PF3D7_0812700	SNRPC	U1 small nuclear ribonucleoprotein C, putative
PF3D7_0812900	N/A	conserved Plasmodium protein, unknown function
PF3D7_0813300	N/A	NPL domain-containing protein, putative
PF3D7_0813600	N/A	translation initiation factor SUI1, putative
PF3D7_0813700	ABCF1	ABC transporter F family member 1
PF3D7_0814100	N/A	conserved Plasmodium protein, unknown function
PF3D7_0814500	N/A	conserved protein, unknown function
PF3D7_0814600	PIMMS22	PIMMS22 protein, putative
PF3D7_0815100	N/A	heptatricopeptide repeat and RAP domain-containing protein, putative
PF3D7_0815300	N/A	FAD-dependent monooxygenase, putative
PF3D7_0815700	Ub	ubiquitin
PF3D7_0815800	VPS9	vacuolar protein sorting-associated protein 9, putative
PF3D7_0815900	aLipDH	dihydrolipoyl dehydrogenase, apicoplast
PF3D7_0816000	RRB1	ribosome assembly protein RRB1, putative
PF3D7_0816100	PPCDC	phosphopantothenoylcysteine decarboxylase, putative
PF3D7_0816200	VPS2	vacuolar protein sorting-associated protein 2, putative
PF3D7_0816300	N/A	HAP2-GCS1 domain-containing protein, putative
PF3D7_0816400	N/A	EF-hand calcium-binding domain-containing protein, putative
PF3D7_0816500	HSP20	small heat shock protein HSP20, putative
PF3D7_0816600	ClpB1	chaperone protein ClpB1
PF3D7_0816700	TRAPPC2L	trafficking protein particle complex subunit 2-like protein, putative
PF3D7_0816900	AK2	adenylate kinase 2
PF3D7_0817000	UBA3	NEDD8-activating enzyme E1 catalytic subunit, putative
PF3D7_0817100	N/A	tRNA modification GTPase, putative
PF3D7_0817200	N/A	conserved protein, unknown function
PF3D7_0817400	N/A	phosphatase, putative
PF3D7_0817500	HINT1	histidine triad nucleotide-binding protein 1
PF3D7_0817800	C3AP3	respiratory chain complex 3 associated protein 3
PF3D7_0818100	N/A	zinc finger protein, putative
PF3D7_0818200	14-3-3I	14-3-3 protein
PF3D7_0818500	N/A	zinc finger protein, putative
PF3D7_0818600	PBLP	BEM46-like protein, putative
PF3D7_0818700	N/A	DNA helicase, putative
PF3D7_0818800	IMP4	U3 small nucleolar ribonucleoprotein protein IMP4, putative
PF3D7_0819000	N/A	ribonuclease, putative
PF3D7_0819200	PLP5	perforin-like protein 5
PF3D7_0819300	N/A	conserved Plasmodium protein, unknown function
PF3D7_0819400	PLP4	perforin-like protein 4
PF3D7_0819500	N/A	conserved protein, unknown function
PF3D7_0819700	N/A	conserved Plasmodium protein, unknown function
PF3D7_0820000	SRCAP	Snf2-related CBP activator, putative
PF3D7_0820100	N/A	RNA-binding protein, putative
PF3D7_0820300	N/A	conserved Plasmodium protein, unknown function
PF3D7_0820400	N/A	conserved Plasmodium protein, unknown function
PF3D7_0820600	N/A	conserved protein, unknown function
PF3D7_0820800	N/A	conserved Plasmodium protein, unknown function
PF3D7_0821000	N/A	conserved Plasmodium protein, unknown function
PF3D7_0821100	PK1	protein kinase 1
PF3D7_0821300	DHX36	ATP-dependent RNA helicase DHX36, putative
PF3D7_0821500	NEP1	ribosomal RNA small subunit methyltransferase NEP1, putative
PF3D7_0822200	N/A	phosphorylated CTD interacting factor 1 WW domain-containing protein, putative
PF3D7_0822600	SEC23	protein transport protein SEC23
PF3D7_0822700	TRP1	thrombospondin-related protein 1, putative
PF3D7_0822900	PIC2	PhIL1-interacting candidate PIC2
PF3D7_0823000	VPS15	serine/threonine protein kinase VPS15, putative
PF3D7_0823100	N/A	RWD domain-containing protein, putative
PF3D7_0823300	GCN5	histone acetyltransferase GCN5
PF3D7_0823500	IMC1i	inner membrane complex protein 1i, putative
PF3D7_0823700	TOM7	mitochondrial import receptor subunit TOM7, putative
PF3D7_0824200	N/A	conserved Plasmodium protein, unknown function
PF3D7_0824500	N/A	conserved protein, unknown function
PF3D7_0824600	DRE2	Fe-S cluster assembly protein DRE2, putative
PF3D7_0824700	LMF1	lipase maturation factor, putative
PF3D7_0824800	N/A	conserved Plasmodium membrane protein, unknown function
PF3D7_0824900	N/A	conserved Plasmodium protein, unknown function
PF3D7_0825000	N/A	conserved Plasmodium protein, unknown function
PF3D7_0825200	IF3a	translation initiation factor IF-3
PF3D7_0825300	N/A	SAYSvFN domain-containing protein, putative
PF3D7_0825400	ATPTG15	ATP synthase-associated protein, putative
PF3D7_0825700	CryPH	crystalloid-specific PH domain-containing protein, putative
PF3D7_0826000	N/A	conserved Plasmodium protein, unknown function
PF3D7_0826100	HEUL	HECT-like E3 ubiquitin ligase, putative
PF3D7_0826200	N/A	alpha/beta hydrolase, putative
PF3D7_0826500	UBE4B	ubiquitin conjugation factor E4 B, putative
PF3D7_0826600	VAMP7	SNARE protein, putative
PF3D7_0827000	DBP10	ATP-dependent RNA helicase DBP10, putative
PF3D7_0827300	N/A	conserved Plasmodium protein, unknown function
PF3D7_0827400	N/A	conserved protein, unknown function
PF3D7_0827600	N/A	conserved Plasmodium protein, unknown function
PF3D7_0827700	N/A	magnesium transporter, putative
PF3D7_0827800	SET3	SET domain protein, putative
PF3D7_0828000	ROM3	rhomboid protease ROM3
PF3D7_0828100	N/A	conserved Plasmodium protein, unknown function
PF3D7_0828200	N/A	leucine--tRNA ligase, putative
PF3D7_0828400	OXA1	mitochondrial inner membrane protein OXA1, putative
PF3D7_0828600	FT1	folate transporter 1
PF3D7_0828800	GAMA	GPI-anchored micronemal antigen
PF3D7_0829000	N/A	conserved Plasmodium membrane protein, unknown function
PF3D7_0829400	N/A	prolyl 4-hydroxylase subunit alpha, putative
PF3D7_0829500	N/A	conserved Plasmodium protein, unknown function
PF3D7_0829600	ETRAMP8	early transcribed membrane protein 8
PF3D7_0830300	SIAP2	sporozoite invasion-associated protein 2
PF3D7_0831000	GEXP09	Plasmodium exported protein (PHISTb), unknown function
PF3D7_0831400	N/A	Plasmodium exported protein, unknown function
PF3D7_0831600	CLAG8	cytoadherence linked asexual protein 8
PF3D7_0832000	N/A	stevor
PF3D7_0832200	N/A	Plasmodium exported protein (PHISTa-like), unknown function
PF3D7_0832300	N/A	Plasmodium exported protein (PHISTa-like), unknown function
PF3D7_0832900	N/A	stevor
PF3D7_0833100	RIF	rifin
PF3D7_0833200	RIF	rifin
PF3D7_0833500	VAR	erythrocyte membrane protein 1, PfEMP1
PF3D7_0900100	VAR	erythrocyte membrane protein 1, PfEMP1
PF3D7_0900300	RIF	rifin
PF3D7_0901000	RIF	rifin
PF3D7_0901100	RIF	rifin
PF3D7_0901600	N/A	stevor
PF3D7_0901700	N/A	Plasmodium exported protein (hyp5), unknown function
PF3D7_0902100	FIKK9.2	serine/threonine protein kinase, FIKK family
PF3D7_0902300	FIKK9.4	serine/threonine protein kinase, FIKK family
PF3D7_0902400	FIKK9.5	serine/threonine protein kinase, FIKK family
PF3D7_0902600	FIKK9.7	serine/threonine protein kinase, FIKK family
PF3D7_0902800	SERA9	serine repeat antigen 9
PF3D7_0902900	N/A	early transcribed membrane protein, putative
PF3D7_0903200	RAB7	ras-related protein RAB7
PF3D7_0903300	N/A	conserved protein, unknown function
PF3D7_0903600	N/A	conserved protein, unknown function
PF3D7_0903700	N/A	alpha tubulin 1
PF3D7_0903800	CCp4	LCCL domain-containing protein
PF3D7_0904100	N/A	AP-4 complex subunit epsilon, putative
PF3D7_0904300	N/A	conserved protein, unknown function
PF3D7_0904400	SPC3	signal peptidase complex subunit 3, putative
PF3D7_0904600	N/A	ubiquitin specific protease, putative
PF3D7_0904700	HU	bacterial histone-like protein
PF3D7_0904800	RPA1	replication protein A1, small fragment
PF3D7_0904900	CuTP	copper-transporting ATPase
PF3D7_0905000	ATPTG4	ATP synthase-associated protein, putative
PF3D7_0905100	NUP221	nucleoporin NUP221, putative
PF3D7_0905200	N/A	mitochondrial carrier protein, putative
PF3D7_0905300	N/A	dynein heavy chain, putative
PF3D7_0905500	N/A	conserved protein, unknown function
PF3D7_0905600	WDR66	WD repeat-containing protein 66, putative
PF3D7_0905700	ATG3	autophagy-related protein 3, putative
PF3D7_0905900	SEC27	coatomer subunit beta, putative
PF3D7_0906000	RNaseII	exoribonuclease II
PF3D7_0906200	N/A	conserved Plasmodium protein, unknown function
PF3D7_0906800	N/A	conserved Plasmodium protein, unknown function
PF3D7_0907100	N/A	conserved Plasmodium protein, unknown function
PF3D7_0907200	N/A	GTPase-activating protein, putative
PF3D7_0907400	ClpY	ATP-dependent protease ATPase subunit ClpY
PF3D7_0907500	N/A	conserved protein, unknown function
PF3D7_0907800	N/A	ribosomal protein L35, apicoplast, putative
PF3D7_0907900	PDF	peptide deformylase
PF3D7_0908000	PMP1	plasma membrane protein 1, putative
PF3D7_0908100	N/A	apicoplast integral membrane protein, putative
PF3D7_0908200	N/A	conserved Plasmodium protein, unknown function
PF3D7_0908500	N/A	conserved Plasmodium protein, unknown function
PF3D7_0908600	N/A	ribosomal RNA methyltransferase, putative
PF3D7_0908700	N/A	tRNA pseudouridine synthase, putative
PF3D7_0908800	N/A	mitochondrial carrier protein, putative
PF3D7_0908900	N/A	conserved Plasmodium protein, unknown function
PF3D7_0909000	N/A	conserved Plasmodium protein, unknown function
PF3D7_0909200	POFUT2	GDP-fucose protein O-fucosyltransferase 2
PF3D7_0909700	N/A	FHA domain protein, putative
PF3D7_0909900	N/A	helicase SKI2W, putative
PF3D7_0910000	SET4	histone-lysine N-methyltransferase SET4
PF3D7_0910100	N/A	exportin-7, putative
PF3D7_0910200	N/A	conserved Plasmodium protein, unknown function
PF3D7_0910300	N/A	conserved protein, unknown function
PF3D7_0910400	N/A	selenide water dikinase, putative
PF3D7_0910500	N/A	DNA repair protein REV1, putative
PF3D7_0910600	YKT6.1	SNARE protein
PF3D7_0910800	NBP35	cytosolic Fe-S cluster assembly factor NBP35, putative
PF3D7_0911100	N/A	START domain-containing protein, putative
PF3D7_0911200	N/A	conserved Plasmodium protein, unknown function
PF3D7_0911300	CRMP1	cysteine repeat modular protein 1
PF3D7_0911400	N/A	conserved Plasmodium protein, unknown function
PF3D7_0911700	N/A	GTP-binding protein, putative
PF3D7_0911900	ICP	falstatin
PF3D7_0912000	N/A	conserved Plasmodium protein, unknown function
PF3D7_0912100	N/A	zinc finger protein, putative
PF3D7_0912200	N/A	conserved protein, unknown function
PF3D7_0912400	N/A	alkaline phosphatase, putative
PF3D7_0912700	N/A	conserved Plasmodium protein, unknown function
PF3D7_0912800	GCD10	tRNA (adenine(58)-N(1))-methyltransferase non-catalytic subunit TRM6, putative
PF3D7_0913100	N/A	heptatricopeptide repeat-containing protein, putative
PF3D7_0913150	N/A	conserved protein, unknown function
PF3D7_0913400	N/A	elongation factor, putative
PF3D7_0913500	AMR4	protein AMR4
PF3D7_0913600	N/A	conserved Plasmodium protein, unknown function
PF3D7_0913800	N/A	conserved Plasmodium protein, unknown function
PF3D7_0913900	RRSapi	arginine--tRNA ligase, putative
PF3D7_0914000	N/A	pseudouridylate synthase, putative
PF3D7_0914100	N/A	conserved Plasmodium protein, unknown function
PF3D7_0914300	N/A	met-10+ like protein, putative
PF3D7_0914500	N/A	conserved Plasmodium protein, unknown function
PF3D7_0915000	NDH2	type II NADH:ubiquinone oxidoreductase
PF3D7_0915300	N/A	heptatricopeptide repeat-containing protein, putative
PF3D7_0915500	N/A	conserved Plasmodium protein, unknown function
PF3D7_0916000	MFS2	major facilitator superfamily domain-containing protein, putative
PF3D7_0916100	TRX3	thioredoxin 3
PF3D7_0916300	N/A	conserved Plasmodium protein, unknown function
PF3D7_0916400	N/A	conserved Plasmodium protein, unknown function
PF3D7_0916500	UFD1	ubiquitin fusion degradation protein 1
PF3D7_0916900	N/A	zinc finger protein, putative
PF3D7_0917000	MOP	merozoite organizing protein
PF3D7_0917100	OGG1	N-glycosylase/DNA lyase, putative
PF3D7_0917400	N/A	conserved Plasmodium protein, unknown function
PF3D7_0918000	GAP50	glideosome-associated protein 50
PF3D7_0918200	N/A	50S ribosomal protein L3, apicoplast, putative
PF3D7_0918400	N/A	conserved Plasmodium protein, unknown function
PF3D7_0918600	RECQ1	ATP-dependent DNA helicase Q1
PF3D7_0918900	gammaGCS	gamma-glutamylcysteine synthetase
PF3D7_0919400	PDI-Trans	protein disulfide-isomerase PDI-Trans
PF3D7_0919500	MFS3	major facilitator superfamily domain-containing protein, putative
PF3D7_0919600	WBP1	dolichyl-diphosphooligosaccharide--protein glycosyltransferase subunit WBP1, putative
PF3D7_0919900	RCC-PIP	regulator of chromosome condensation-PP1-interacting protein
PF3D7_0920000	ELO3	elongation of fatty acids protein, putative
PF3D7_0920100	N/A	chaperone, putative
PF3D7_0920200	N/A	CS domain protein, putative
PF3D7_0920300	N/A	conserved Plasmodium protein, unknown function
PF3D7_0920400	N/A	conserved Plasmodium protein, unknown function
PF3D7_0920500	N/A	ADP-ribosylation factor, putative
PF3D7_0920600	N/A	conserved Plasmodium protein, unknown function
PF3D7_0920700	N/A	CRAL/TRIO domain-containing protein, putative
PF3D7_0921000	N/A	ubiquitin-conjugating enzyme E2, putative
PF3D7_0921200	N/A	conserved Plasmodium membrane protein, unknown function
PF3D7_0921300	N/A	RAP protein, putative
PF3D7_0921400	NifU	NifU-like scaffold protein
PF3D7_0921600	N/A	tetratricopeptide repeat protein, putative
PF3D7_0921700	N/A	conserved protein, unknown function
PF3D7_0921900	N/A	conserved Plasmodium protein, unknown function
PF3D7_0922000	N/A	dynein intermediate chain, putative
PF3D7_0922200	SAMS	S-adenosylmethionine synthetase
PF3D7_0922300	N/A	conserved protein, unknown function
PF3D7_0922600	N/A	glutamine synthetase, putative
PF3D7_0922700	PRP18	pre-mRNA-splicing factor 18, putative
PF3D7_0922800	N/A	conserved Plasmodium protein, unknown function
PF3D7_0922900	FabG	3-oxoacyl-[acyl-carrier-protein] reductase
PF3D7_0923100	N/A	OTU domain-containing protein, putative
PF3D7_0923200	NOS	nitric oxide synthase, putative
PF3D7_0923600	LipL2	lipoate-protein ligase 2
PF3D7_0923800	TRXR	thioredoxin reductase
PF3D7_0924100	N/A	conserved Plasmodium protein, unknown function
PF3D7_0924300	TPK	thiamine pyrophosphokinase
PF3D7_0924500	N/A	conserved Plasmodium membrane protein, unknown function
PF3D7_0925100	N/A	conserved Plasmodium protein, unknown function
PF3D7_0925400	N/A	protein phosphatase-beta
PF3D7_0925500	TLP2	thioredoxin-like protein 2
PF3D7_0925600	N/A	zinc binding protein (Yippee), putative
PF3D7_0925800	UPF2	regulator of nonsense transcripts 2, putative
PF3D7_0926100	N/A	protein kinase, putative
PF3D7_0926200	N/A	conserved Plasmodium protein, unknown function
PF3D7_0926300	N/A	protein kinase, putative
PF3D7_0926400	N/A	monocarboxylate transporter, putative
PF3D7_0926700	NADSYN	glutamine-dependent NAD(+) synthetase, putative
PF3D7_0926900	N/A	replication termination factor, putative
PF3D7_0927200	N/A	zinc finger protein, putative
PF3D7_0927400	N/A	conserved Plasmodium protein, unknown function
PF3D7_0927700	PPP4	serine/threonine protein phosphatase 4, putative
PF3D7_0927800	COX5B	cytochrome c oxidase subunit 5B, putative
PF3D7_0928000	COX6B	cytochrome c oxidase subunit 6B, putative
PF3D7_0928200	N/A	conserved Plasmodium protein, unknown function
PF3D7_0928300	N/A	conserved Plasmodium protein, unknown function
PF3D7_0928900	GK	guanylate kinase
PF3D7_0929400	RhopH2	high molecular weight rhoptry protein 2
PF3D7_0929600	N/A	G2 protein, putative
PF3D7_0929700	N/A	conserved Plasmodium protein, unknown function
PF3D7_0929800	N/A	conserved Plasmodium protein, unknown function
PF3D7_0929900	N/A	conserved Plasmodium protein, unknown function
PF3D7_0930300	MSP1	merozoite surface protein 1
PF3D7_0930400	N/A	zinc finger protein, putative
PF3D7_0930500	DGK1	diacylglycerol kinase, putative
PF3D7_0930600	CYP72	peptidyl-prolyl cis-trans isomerase
PF3D7_0930700	N/A	conserved Plasmodium protein, unknown function
PF3D7_0930800	N/A	conserved Plasmodium membrane protein, unknown function
PF3D7_0931100	N/A	nucleolar protein Nop52, putative
PF3D7_0931300	N/A	conserved Plasmodium protein, unknown function
PF3D7_0931700	N/A	PIH1 domain-containing protein, putative
PF3D7_0931800	N/A	proteasome subunit beta type-6, putative
PF3D7_0932100	N/A	protein MAM3, putative
PF3D7_0932300	M18AAP	M18 aspartyl aminopeptidase
PF3D7_0932400	RF1	peptide chain release factor 1
PF3D7_0932500	DHHC6	palmitoyltransferase DHHC6, putative
PF3D7_0932600	RPS6	apicoplast ribosomal protein S6, putative
PF3D7_0932700	N/A	conserved Plasmodium protein, unknown function
PF3D7_0932800	CSE1	importin alpha re-exporter, putative
PF3D7_0933000	N/A	CSTF domain-containing protein, putative
PF3D7_0933100	N/A	conserved Plasmodium protein, unknown function
PF3D7_0933300	N/A	conserved Plasmodium protein, unknown function
PF3D7_0933400	N/A	conserved Plasmodium protein, unknown function
PF3D7_0933500	N/A	gamma-tubulin complex component, putative
PF3D7_0933600	QCR1	mitochondrial-processing peptidase subunit beta, putative
PF3D7_0933800	N/A	tubulin delta chain, putative
PF3D7_0934000	N/A	histidine--tRNA ligase, putative
PF3D7_0934100	XPD	TFIIH basal transcription factor complex helicase XPD subunit
PF3D7_0934500	N/A	V-type proton ATPase subunit E, putative
PF3D7_0934600	N/A	conserved Plasmodium protein, unknown function
PF3D7_0935100	KSH1	protein kish, putative
PF3D7_0935400	GDV1	gametocyte development protein 1
PF3D7_0935500	GEXP22	Plasmodium exported protein, unknown function
PF3D7_0935800	CLAG9	cytoadherence linked asexual protein 9
PF3D7_0936100	ETRAMP9	early transcribed membrane protein
PF3D7_0936400	REX4	ring-exported protein 4
PF3D7_0936700	N/A	lysophospholipase, putative
PF3D7_0937000	N/A	Plasmodium exported protein (PHISTb), unknown function
PF3D7_0937200	N/A	lysophospholipase, putative
PF3D7_0937300	RIF	rifin
PF3D7_0937400	RIF	rifin
PF3D7_0937800	VAR	erythrocyte membrane protein 1, PfEMP1
PF3D7_1000100	VAR	erythrocyte membrane protein 1, PfEMP1
PF3D7_1000300	RIF	rifin
PF3D7_1000400	RIF	rifin
PF3D7_1000600	RIF	rifin
PF3D7_1001400	XL1	exported lipase 1
PF3D7_1001800	N/A	Plasmodium exported protein (PHISTc), unknown function
PF3D7_1001900	PfJ23	Plasmodium exported protein (hyp16), unknown function
PF3D7_1002000	N/A	Plasmodium exported protein (hyp2), unknown function
PF3D7_1002300	N/A	conserved Plasmodium protein, unknown function
PF3D7_1002500	N/A	conserved protein, unknown function
PF3D7_1002700	N/A	conserved Plasmodium protein, unknown function
PF3D7_1003000	N/A	guanylate cyclase organizer UGO, putative
PF3D7_1003300	ARD1	N-terminal acetyltransferase A complex catalytic subunit ARD1, putative
PF3D7_1003400	N/A	conserved Plasmodium protein, unknown function
PF3D7_1003600	IMC1c	inner membrane complex protein 1c, putative
PF3D7_1003700	N/A	MKT1 domain-containing protein, putative
PF3D7_1003800	EFTUD2	U5 small nuclear ribonucleoprotein component, putative
PF3D7_1004000	N/A	60S ribosomal protein L13, putative
PF3D7_1004200	N/A	WD repeat-containing protein, putative
PF3D7_1004300	N/A	E3 ubiquitin-protein ligase, putative
PF3D7_1004900	N/A	conserved protein, unknown function
PF3D7_1005000	MRSapi	methionine--tRNA ligase, putative
PF3D7_1005300	N/A	conserved Plasmodium protein, unknown function
PF3D7_1005500	UPF1	regulator of nonsense transcripts 1, putative
PF3D7_1005600	N/A	DnaJ protein, putative
PF3D7_1005700	N/A	peptidase, putative
PF3D7_1005900	N/A	conserved protein, unknown function
PF3D7_1006000	IMP4	IMP1-like protein, putative
PF3D7_1006400	N/A	heptatricopeptide repeat-containing protein, putative
PF3D7_1006600	PhLP3	phosducin-like protein 3, putative
PF3D7_1006700	N/A	conserved Plasmodium protein, unknown function
PF3D7_1007300	N/A	RING zinc finger protein, putative
PF3D7_1007500	N/A	conserved Plasmodium protein, unknown function
PF3D7_1007600	N/A	conserved protein, unknown function
PF3D7_1007800	N/A	conserved Plasmodium protein, unknown function
PF3D7_1008000	HDA2	histone deacetylase 2
PF3D7_1008100	PHD1	PHD finger protein PHD1
PF3D7_1008500	N/A	protein GPR89, putative
PF3D7_1008600	N/A	zinc finger (CCCH type) protein, putative
PF3D7_1008700	N/A	tubulin beta chain
PF3D7_1008900	AK1	adenylate kinase
PF3D7_1009100	N/A	conserved Plasmodium membrane protein, unknown function
PF3D7_1009200	N/A	ribonuclease, putative
PF3D7_1009400	ZNF2	zinc finger protein, putative
PF3D7_1009500	N/A	metalloprotease, putative
PF3D7_1009600	PPM10	protein phosphatase PPM10, putative
PF3D7_1009800	N/A	conserved Plasmodium membrane protein, unknown function
PF3D7_1009900	N/A	heptatricopeptide repeat-containing protein, putative
PF3D7_1010000	N/A	ribosomal protein L43, mitochondrial, putative
PF3D7_1010200	N/A	DNA2/NAM7 helicase, putative
PF3D7_1010700	N/A	dolichyl-phosphate-mannose--protein mannosyltransferase, putative
PF3D7_1010800	N/A	50S ribosomal protein L22, mitochondrial, putative
PF3D7_1011000	ISP1	inner membrane complex sub-compartment protein 1
PF3D7_1011300	ARV1	protein ARV1, putative
PF3D7_1011400	N/A	proteasome subunit beta type-5
PF3D7_1011500	N/A	conserved protein, unknown function
PF3D7_1012300	QCR7	cytochrome b-c1 complex subunit 7, putative
PF3D7_1012400	HGPRT	hypoxanthine-guanine phosphoribosyltransferase
PF3D7_1012500	N/A	phosphoglucomutase, putative
PF3D7_1012600	GMPS	GMP synthase [glutamine-hydrolyzing]
PF3D7_1012700	NIF4	NLI interacting factor-like phosphatase, putative
PF3D7_1012900	ATG18	autophagy-related protein 18
PF3D7_1013000	N/A	zinc finger protein, putative
PF3D7_1013100	UTP13	U3 small nucleolar RNA-associated protein 13, putative
PF3D7_1013200	N/A	conserved Plasmodium protein, unknown function
PF3D7_1013300	N/A	conserved Plasmodium protein, unknown function
PF3D7_1013400	N/A	conserved Plasmodium protein, unknown function
PF3D7_1013500	PI-PLC	phosphoinositide-specific phospholipase C
PF3D7_1013600	N/A	conserved Plasmodium protein, unknown function
PF3D7_1013700	N/A	thioredoxin-like protein, putative
PF3D7_1013900	N/A	translation initiation factor eIF-2B subunit delta, putative
PF3D7_1014000	FS	GDP-L-fucose synthase
PF3D7_1014100	MSA180	merozoite surface protein MSA180
PF3D7_1014200	HAP2	male gamete fusion factor HAP2, putative
PF3D7_1014300	N/A	SPRY domain-containing protein, putative
PF3D7_1014500	N/A	conserved Plasmodium protein, unknown function
PF3D7_1014600	ADA2	transcriptional coactivator ADA2
PF3D7_1014900	KIC8	protein KIC8
PF3D7_1015000	N/A	FAD synthetase, putative
PF3D7_1015100	N/A	CWC16 domain-containing protein, putative
PF3D7_1015200	CysRS	cysteine--tRNA ligase
PF3D7_1015300	METAP1b	methionine aminopeptidase 1b, putative
PF3D7_1015800	N/A	ribonucleoside-diphosphate reductase small chain, putative
PF3D7_1016100	N/A	conserved Plasmodium protein, unknown function
PF3D7_1016500	N/A	Plasmodium exported protein (PHISTc), unknown function
PF3D7_1016900	ETRAMP10.3	early transcribed membrane protein 10.3
PF3D7_1017000	N/A	DNA polymerase delta catalytic subunit
PF3D7_1017100	RON12	rhoptry neck protein 12
PF3D7_1017200	N/A	enoyl-CoA hydratase-related protein, putative
PF3D7_1017500	ELC	myosin essential light chain ELC
PF3D7_1017700	N/A	conserved Plasmodium protein, unknown function
PF3D7_1017800	N/A	conserved Plasmodium protein, unknown function
PF3D7_1017900	RPN5	26S proteasome regulatory subunit p55, putative
PF3D7_1018000	N/A	tRNA pseudouridine synthase, putative
PF3D7_1018200	PPP8	serine/threonine protein phosphatase 8, putative
PF3D7_1018300	N/A	peptidase, putative
PF3D7_1018500	RDS3	pre-mRNA-splicing factor RDS3, putative
PF3D7_1018600	N/A	tRNA wybutosine-synthesizing protein, putative
PF3D7_1018800	N/A	conserved protein, unknown function
PF3D7_1018900	N/A	conserved Plasmodium protein, unknown function
PF3D7_1019000	N/A	eukaryotic translation initiation factor subunit eIF2A, putative
PF3D7_1019100	N/A	conserved Plasmodium protein, unknown function
PF3D7_1019300	N/A	zinc finger protein, putative
PF3D7_1019500	N/A	TMEM94 domain-containing protein, putative
PF3D7_1019600	N/A	conserved Plasmodium protein, unknown function
PF3D7_1019800	N/A	tRNA methyltransferase, putative
PF3D7_1019900	ATG8	autophagy-related protein 8
PF3D7_1020200	N/A	conserved Plasmodium protein, unknown function
PF3D7_1020300	N/A	cytoplasmic dynein intermediate chain, putative
PF3D7_1020400	RCM1	rRNA (cytosine-C(5))-methyltransferase, putative
PF3D7_1020600	N/A	conserved Plasmodium membrane protein, unknown function
PF3D7_1020700	N/A	N-acetyltransferase, GNAT family, putative
PF3D7_1020800	DLAT	dihydrolipoamide acyltransferase component E2
PF3D7_1021000	N/A	conserved protein, unknown function
PF3D7_1021100	N/A	conserved Plasmodium protein, unknown function
PF3D7_1021200	N/A	conserved Plasmodium protein, unknown function
PF3D7_1021300	N/A	apicoplast integral membrane protein, putative
PF3D7_1021400	N/A	endomembrane protein 70, putative
PF3D7_1021700	N/A	VPS13 domain-containing protein, putative
PF3D7_1021800	SEA1	schizont egress antigen-1
PF3D7_1022000	N/A	RNA-binding protein UIS12, putative
PF3D7_1022200	N/A	conserved Plasmodium membrane protein, unknown function
PF3D7_1022300	ZIPCO	ZIP domain-containing protein, putative
PF3D7_1022500	CS	citrate synthase, mitochondrial, putative
PF3D7_1022700	PLSCR	phospholipid scramblase
PF3D7_1022900	ApiCOX13	cytochrome c oxidase subunit ApiCOX13, putative
PF3D7_1023000	N/A	conserved Plasmodium protein, unknown function
PF3D7_1023100	N/A	dynein heavy chain, putative
PF3D7_1023200	OMPDC	orotidine 5'-phosphate decarboxylase
PF3D7_1023600	N/A	conserved protein, unknown function
PF3D7_1023700	N/A	conserved Plasmodium protein, unknown function
PF3D7_1023800	N/A	conserved Plasmodium protein, unknown function
PF3D7_1023900	CHD1	chromodomain-helicase-DNA-binding protein 1 homolog, putative
PF3D7_1024000	N/A	conserved Plasmodium protein, unknown function
PF3D7_1024100	N/A	conserved Plasmodium protein, unknown function
PF3D7_1024500	N/A	conserved Plasmodium protein, unknown function
PF3D7_1024600	N/A	RAP protein, putative
PF3D7_1024700	N/A	conserved protein, unknown function
PF3D7_1024900	N/A	conserved Plasmodium protein, unknown function
PF3D7_1025000	EPS15	Eps15-like protein
PF3D7_1025100	GFPT	glutamine--fructose-6-phosphate aminotransferase [isomerizing], putative
PF3D7_1025200	ATP12	ATP synthase mitochondrial F1 complex assembly factor 2, putative
PF3D7_1025300	N/A	conserved protein, unknown function
PF3D7_1025400	N/A	conserved Plasmodium membrane protein, unknown function
PF3D7_1025500	N/A	conserved Plasmodium protein, unknown function
PF3D7_1025600	COX17	cytochrome c oxidase copper chaperone, putative
PF3D7_1025700	N/A	conserved protein, unknown function
PF3D7_1025900	N/A	conserved protein, unknown function
PF3D7_1026200	N/A	conserved protein, unknown function
PF3D7_1026300	N/A	conserved Plasmodium protein, unknown function
PF3D7_1026400	CDC20	cell division cycle protein 20 homolog, putative
PF3D7_1026600	N/A	conserved Plasmodium protein, unknown function
PF3D7_1026800	RPS2	40S ribosomal protein S2
PF3D7_1027500	N/A	conserved Plasmodium protein, unknown function
PF3D7_1027600	SPO11-2	meiotic recombination protein SPO11-2, putative
PF3D7_1027800	RPL3	60S ribosomal protein L3
PF3D7_1027900	DHHC10	palmitoyltransferase DHHC10, putative
PF3D7_1028100	PPO	protoporphyrinogen oxidase
PF3D7_1028600	N/A	conserved Plasmodium protein, unknown function
PF3D7_1028900	IMC1m	inner membrane complex protein 1m, putative
PF3D7_1029100	N/A	conserved Plasmodium protein, unknown function
PF3D7_1029200	N/A	WD repeat-containing protein, putative
PF3D7_1029300	N/A	conserved protein, unknown function
PF3D7_1029400	CDC50C	LEM3/CDC50 family protein, putative
PF3D7_1029600	ADA	adenosine deaminase
PF3D7_1029800	HPR2	heptatricopeptide repeat and RAP domain-containing protein, putative
PF3D7_1029900	N/A	ORC3 domain-containing protein, putative
PF3D7_1030100	PRP22	pre-mRNA-splicing factor ATP-dependent RNA helicase PRP22, putative
PF3D7_1030200	CLAMP	claudin-like apicomplexan microneme protein, putative
PF3D7_1030300	N/A	conserved Plasmodium protein, unknown function
PF3D7_1030400	N/A	conserved protein, unknown function
PF3D7_1030500	RPN9	26S proteasome regulatory subunit RPN9, putative
PF3D7_1030900	P28	ookinete surface protein P28
PF3D7_1031200	MORN1	MORN repeat-containing protein 1
PF3D7_1031300	N/A	SAE2 domain-containing protein, putative
PF3D7_1031400	OTU	OTU-like cysteine protease
PF3D7_1031700	I3	protein phosphatase inhibitor 3
PF3D7_1031900	N/A	conserved Plasmodium protein, unknown function
PF3D7_1032000	RimM	ribosome maturation factor RimM, putative
PF3D7_1032100	DCP1	mRNA-decapping enzyme subunit 1, putative
PF3D7_1032400	PIGA	phosphatidylinositol N-acetylglucosaminyltransferase subunit A, putative
PF3D7_1032600	N/A	conserved protein, unknown function
PF3D7_1032900	N/A	RNA polymerase II-associated protein 1, putative
PF3D7_1033000	HPR1	heptatricopeptide repeat-containing protein HPR1, putative
PF3D7_1033100	AdoMetDC/ODC	S-adenosylmethionine decarboxylase/ornithine decarboxylase
PF3D7_1033200	ETRAMP10.2	early transcribed membrane protein 10.2
PF3D7_1033300	N/A	conserved protein, unknown function
PF3D7_1033500	WDR70	WD repeat-containing protein 70, putative
PF3D7_1033600	CEF1	pre-mRNA-splicing factor CEF1, putative
PF3D7_1034100	N/A	conserved protein, unknown function
PF3D7_1034400	SDHA	flavoprotein subunit of succinate dehydrogenase
PF3D7_1034500	N/A	armadillo repeat protein, putative
PF3D7_1034600	IF3b	translation initiation factor IF-3, putative
PF3D7_1034800	N/A	conserved protein, unknown function
PF3D7_1034900	MRScyt	methionine--tRNA ligase
PF3D7_1035100	N/A	probable protein, unknown function
PF3D7_1035200	N/A	S-antigen
PF3D7_1035300	GLURP	glutamate-rich protein GLURP
PF3D7_1035800	M712	probable protein, unknown function
PF3D7_1035900	MAAP	merozoites-associated armadillo repeats protein
PF3D7_1036300	DBLMSP2	duffy binding-like merozoite surface protein 2
PF3D7_1036600	N/A	conserved protein, unknown function
PF3D7_1037000	REV3	DNA polymerase zeta catalytic subunit, putative
PF3D7_1037100	PyKII	pyruvate kinase 2
PF3D7_1037200	N/A	conserved Plasmodium protein, unknown function
PF3D7_1037500	DYN2	dynamin-like protein
PF3D7_1037800	N/A	dynein intermediate chain, putative
PF3D7_1038200	N/A	conserved Plasmodium protein, unknown function
PF3D7_1038300	N/A	conserved Plasmodium protein, unknown function
PF3D7_1038500	N/A	Plasmodium exported protein, unknown function
PF3D7_1038800	N/A	RESA-like protein with PHIST and DnaJ domains
PF3D7_1039000	FIKK10.2	serine/threonine protein kinase, FIKK family
PF3D7_1039700	MC-2TM	Pfmc-2TM Maurer's cleft two transmembrane protein
PF3D7_1039900	EPF4	exported protein family 4
PF3D7_1040000	RIF	rifin
PF3D7_1040400	RIF	rifin
PF3D7_1040600	RIF	rifin
PF3D7_1041100	RIF	rifin
PF3D7_1041200	RIF	rifin
PF3D7_1041300	VAR	erythrocyte membrane protein 1, PfEMP1
PF3D7_1100100	VAR	erythrocyte membrane protein 1, PfEMP1
PF3D7_1100200	VAR	erythrocyte membrane protein 1, PfEMP1
PF3D7_1100800	MC-2TM	Pfmc-2TM Maurer's cleft two transmembrane protein
PF3D7_1101200	RIF	rifin
PF3D7_1101300	RIF	rifin
PF3D7_1101500	EPF4	exported protein family 4
PF3D7_1101700	MC-2TM	Pfmc-2TM Maurer's cleft two transmembrane protein
PF3D7_1102300	N/A	Plasmodium exported protein, unknown function
PF3D7_1102400	PPCS	phosphopantothenate--cysteine ligase, putative
PF3D7_1102900	N/A	Plasmodium exported protein (hyp11), unknown function
PF3D7_1103100	RPP1	60S acidic ribosomal protein P1, putative
PF3D7_1103500	N/A	CPW-WPC family protein
PF3D7_1103800	NOT1-G	CCR4-NOT transcription complex subunit NOT1-G, putative
PF3D7_1104000	N/A	phenylalanine--tRNA ligase beta subunit
PF3D7_1104200	SNF2L	chromatin remodeling protein
PF3D7_1104300	N/A	conserved Plasmodium protein, unknown function
PF3D7_1104400	Trx-mero	thioredoxin-like mero protein
PF3D7_1104900	N/A	calcium/calmodulin-dependent protein kinase, putative
PF3D7_1105200	WDR8	WD repeat-containing protein WRAP73, putative
PF3D7_1105600	PTEX88	translocon component PTEX88
PF3D7_1106100	N/A	ribosomal protein S15, apicoplast, putative
PF3D7_1106200	N/A	conserved Plasmodium protein, unknown function
PF3D7_1106300	XRN1	5'-3' exoribonuclease 1, putative
PF3D7_1106400	N/A	conserved Plasmodium protein, unknown function
PF3D7_1106500	N/A	conserved Plasmodium protein, unknown function
PF3D7_1106600	N/A	DEAD/DEAH box helicase, putative
PF3D7_1106700	DNA2	DNA replication ATP-dependent helicase/nuclease DNA2, putative
PF3D7_1106800	pTKL	pseudo-tyrosine kinase-like protein
PF3D7_1107000	LSM4	U6 snRNA-associated Sm-like protein LSm4, putative
PF3D7_1107200	N/A	conserved protein, unknown function
PF3D7_1107300	PAIP1	polyadenylate-binding protein-interacting protein 1, putative
PF3D7_1107600	N/A	conserved Plasmodium protein, unknown function
PF3D7_1107800	ApiAP2	AP2 domain transcription factor, putative
PF3D7_1107900	MSCS	mechanosensitive ion channel protein, putative
PF3D7_1108100	N/A	conserved Plasmodium protein, unknown function
PF3D7_1108300	PCD	pterin-4a-carbinolamine dehydratase
PF3D7_1108600	ERC	endoplasmic reticulum-resident calcium binding protein
PF3D7_1108700	Pfj2	heat shock protein J2
PF3D7_1108900	N/A	tetratricopeptide repeat protein, putative
PF3D7_1109100	N/A	conserved Plasmodium protein, unknown function
PF3D7_1110200	PRPF6	pre-mRNA-processing factor 6, putative
PF3D7_1110500	VPS35	vacuolar protein sorting-associated protein 35, putative
PF3D7_1110800	N/A	conserved Plasmodium protein, unknown function
PF3D7_1111000	NSUN2	RNA cytosine C(5)-methyltransferase NSUN2
PF3D7_1111600	N/A	endonuclease/exonuclease/phosphatase family protein, putative
PF3D7_1111700	N/A	conserved Plasmodium protein, unknown function
PF3D7_1111900	N/A	Josephin domain-containing protein, putative
PF3D7_1112000	N/A	conserved protein, unknown function
PF3D7_1112100	N/A	conserved Plasmodium protein, unknown function
PF3D7_1113000	N/A	conserved Plasmodium protein, unknown function
PF3D7_1113100	PRL	protein tyrosine phosphatase
PF3D7_1113600	N/A	conserved Plasmodium protein, unknown function
PF3D7_1113900	MAPK2	mitogen-activated protein kinase 2
PF3D7_1114400	N/A	RAP protein, putative
PF3D7_1114500	N/A	conserved Plasmodium protein, unknown function
PF3D7_1114700	CLK3	cyclin-dependent-like kinase CLK3
PF3D7_1114800	G3PDH	glycerol-3-phosphate dehydrogenase, putative
PF3D7_1114900	N/A	filamin domain-containing protein, putative
PF3D7_1115100	N/A	conserved protein, unknown function
PF3D7_1115600	CYP19B	peptidyl-prolyl cis-trans isomerase
PF3D7_1115900	DHHC9	palmitoyltransferase DHHC9
PF3D7_1116100	N/A	serine esterase, putative
PF3D7_1116200	PDX2	pyridoxine biosynthesis protein PDX2
PF3D7_1116300	CYP19C	peptidyl-prolyl cis-trans isomerase
PF3D7_1116400	SEC12	guanine nucleotide-exchange factor SEC12
PF3D7_1116700	DPAP1	dipeptidyl aminopeptidase 1
PF3D7_1117000	N/A	MFS domain-containing protein P115, putative
PF3D7_1117100	UCH54	ubiquitin carboxyl-terminal hydrolase UCH54
PF3D7_1117200	N/A	conserved Plasmodium protein, unknown function
PF3D7_1117300	N/A	conserved protein, unknown function
PF3D7_1117500	TyrRSapi	tyrosine--tRNA ligase
PF3D7_1117800	MLH	DNA mismatch repair protein MLH
PF3D7_1117900	N/A	conserved Plasmodium protein, unknown function
PF3D7_1118000	N/A	conserved Plasmodium protein, unknown function
PF3D7_1118200	N/A	heat shock protein 90, putative
PF3D7_1118300	N/A	insulinase, putative
PF3D7_1118400	HAD4	haloacid dehalogenase-like hydrolase, putative
PF3D7_1118500	NOP56	nucleolar protein 56, putative
PF3D7_1118700	MLC-B	myosin light chain B
PF3D7_1118800	ARC40	actin-related protein 2/3 complex subunit 1, putative
PF3D7_1119200	N/A	conserved protein, unknown function
PF3D7_1119800	ASF1	alternative splicing factor ASF-1, putative
PF3D7_1119900	SEC16	protein transport protein SEC16, putative
PF3D7_1120500	N/A	tRNA nucleotidyltransferase, putative
PF3D7_1120700	N/A	conserved Plasmodium protein, unknown function
PF3D7_1120800	N/A	conserved Plasmodium protein, unknown function
PF3D7_1121000	DHHC3	palmitoyltransferase DHHC3
PF3D7_1121100	N/A	conserved protein, unknown function
PF3D7_1121200	N/A	conserved protein, unknown function
PF3D7_1121300	TKL2	tyrosine kinase-like protein
PF3D7_1121400	N/A	WD repeat-containing protein, putative
PF3D7_1121500	N/A	conserved protein, unknown function
PF3D7_1122000	N/A	conserved protein, unknown function
PF3D7_1122100	GPI16	GPI transamidase component GPI16, putative
PF3D7_1122200	JmjC3	JmjC domain-containing protein 3
PF3D7_1122300	N/A	conserved Plasmodium protein, unknown function
PF3D7_1122400	N/A	conserved Plasmodium protein, unknown function
PF3D7_1122500	KIC10	protein KIC10
PF3D7_1122600	N/A	conserved Plasmodium protein, unknown function
PF3D7_1122800	CDPK6	calcium-dependent protein kinase 6
PF3D7_1122900	N/A	dynein heavy chain, putative
PF3D7_1123000	N/A	conserved Plasmodium protein, unknown function
PF3D7_1123100	CDPK7	calcium-dependent protein kinase 7
PF3D7_1123200	LRR11	leucine-rich repeat protein
PF3D7_1123300	N/A	RING zinc finger protein, putative
PF3D7_1123500	GP2	golgi protein 2
PF3D7_1123600	N/A	RAP protein, putative
PF3D7_1123700	N/A	ribosomal protein L37, mitochondrial, putative
PF3D7_1123800	SMC5	structural maintenance of chromosomes protein 5, putative
PF3D7_1124000	ERO1	endoplasmic reticulum oxidoreductin, putative
PF3D7_1124200	N/A	thioredoxin-like protein, putative
PF3D7_1124500	pdhA	pyruvate dehydrogenase E1 component subunit alpha
PF3D7_1124600	EK	ethanolamine kinase
PF3D7_1124700	MGE1	GrpE protein homolog, mitochondrial, putative
PF3D7_1124800	RRS1	ribosome biogenesis regulatory protein, putative
PF3D7_1125000	N/A	conserved protein, unknown function
PF3D7_1125100	ICAP2	ATP synthase F0 subunit b-like protein, putative
PF3D7_1125300	mtRNAP	DNA-directed RNA polymerase
PF3D7_1125400	TIM44	mitochondrial import inner membrane translocase subunit TIM44, putative
PF3D7_1125800	N/A	kelch domain-containing protein, putative
PF3D7_1126000	ThrRS	threonine--tRNA ligase
PF3D7_1126100	ATG7	autophagy-related protein 7, putative
PF3D7_1126300	N/A	DnaJ protein, putative
PF3D7_1126500	N/A	WD repeat-containing protein, putative
PF3D7_1126600	N/A	steryl ester hydrolase, putative
PF3D7_1126700	ATG23	conserved Plasmodium protein, unknown function
PF3D7_1127100	dUTPase	deoxyuridine 5'-triphosphate nucleotidohydrolase
PF3D7_1127200	N/A	conserved Plasmodium protein, unknown function
PF3D7_1127300	N/A	tRNA (guanine-N(7)-)-methyltransferase, putative
PF3D7_1127500	N/A	protein disulfide-isomerase, putative
PF3D7_1127700	N/A	conserved Plasmodium protein, unknown function
PF3D7_1127800	N/A	TFIIS central domain-containing protein, putative
PF3D7_1128000	N/A	conserved Plasmodium protein, unknown function
PF3D7_1128100	N/A	prefoldin subunit 5, putative
PF3D7_1128300	PFK11	ATP-dependent 6-phosphofructokinase
PF3D7_1128500	mHCF101	Fe-S cluster assembly factor HCF101, putative
PF3D7_1128700	GPI8	GPI-anchor transamidase, putative
PF3D7_1128900	N/A	conserved protein, unknown function
PF3D7_1129000	SpdSyn	spermidine synthase
PF3D7_1129200	RPN7	26S proteasome regulatory subunit RPN7, putative
PF3D7_1129300	N/A	conserved Plasmodium protein, unknown function
PF3D7_1129400	NSUN3	RNA cytosine C(5)-methyltransferase, putative
PF3D7_1129500	N/A	A/G-specific adenine glycosylase, putative
PF3D7_1129600	N/A	phosphatidylinositol-4-phosphate 5-kinase, putative
PF3D7_1129900	MFR5	major facilitator superfamily-related transporter, putative
PF3D7_1130000	PAGM	phosphoacetylglucosamine mutase, putative
PF3D7_1130200	PfP0	60S ribosomal protein P0
PF3D7_1130600	N/A	methyltransferase, putative
PF3D7_1130900	N/A	conserved Plasmodium protein, unknown function
PF3D7_1131100	SR1	serpentine receptor 1, putative
PF3D7_1131200	N/A	conserved Plasmodium protein, unknown function
PF3D7_1131300	N/A	conserved Plasmodium protein, unknown function
PF3D7_1131400	N/A	conserved Plasmodium protein, unknown function
PF3D7_1131500	N/A	conserved Plasmodium protein, unknown function
PF3D7_1131600	N/A	kelch domain-containing protein, putative
PF3D7_1132100	N/A	RNA-binding protein, putative
PF3D7_1132200	TCP1	T-complex protein 1 subunit alpha
PF3D7_1132300	N/A	nucleic acid binding protein, putative
PF3D7_1132400	N/A	conserved Plasmodium membrane protein, unknown function
PF3D7_1132500	N/A	amino acid transporter, putative
PF3D7_1132700	mRPL2	50S ribosomal protein L2, putative
PF3D7_1132900	GCVH	glycine cleavage system H protein
PF3D7_1133000	N/A	conserved Plasmodium protein, unknown function
PF3D7_1133200	N/A	conserved Plasmodium protein, unknown function
PF3D7_1133400	AMA1	apical membrane antigen 1
PF3D7_1133800	N/A	RNA (uracil-5-)methyltransferase, putative
PF3D7_1133900	N/A	conserved Plasmodium protein, unknown function
PF3D7_1134000	HSP70-3	heat shock protein 70
PF3D7_1134200	N/A	conserved Plasmodium protein, unknown function
PF3D7_1134500	N/A	alpha/beta hydrolase, putative
PF3D7_1134600	N/A	zinc finger protein, putative
PF3D7_1135000	N/A	PQ-loop repeat-containing protein
PF3D7_1135100	PPM8	protein phosphatase PPM8, putative
PF3D7_1135300	N/A	conserved Plasmodium membrane protein, unknown function
PF3D7_1135500	N/A	RNA-binding protein, putative
PF3D7_1135600	CAPD3	condensin-2 complex subunit D3, putative
PF3D7_1135700	N/A	conserved Plasmodium protein, unknown function
PF3D7_1136000	N/A	conserved Plasmodium protein, unknown function
PF3D7_1136100	N/A	conserved Plasmodium protein, unknown function
PF3D7_1136200	N/A	conserved Plasmodium protein, unknown function
PF3D7_1136400	SRP72	signal recognition particle subunit SRP72, putative
PF3D7_1136600	N/A	conserved Plasmodium protein, unknown function
PF3D7_1136800	N/A	DnaJ protein, putative
PF3D7_1136900	SUB2	subtilisin-like protease 2
PF3D7_1137400	N/A	UVB-resistance protein UVR8 homologue
PF3D7_1137500	N/A	ribosomal protein S14, apicoplast, putative
PF3D7_1137700	N/A	calcium-binding protein, putative
PF3D7_1137900	N/A	conserved Plasmodium protein, unknown function
PF3D7_1138000	N/A	conserved Plasmodium protein, unknown function
PF3D7_1138200	N/A	conserved protein, unknown function
PF3D7_1138400	GCalpha	guanylyl cyclase alpha
PF3D7_1138500	PPM2	protein phosphatase PPM2
PF3D7_1139500	N/A	AAA family ATPase, putative
PF3D7_1139700	N/A	adrenodoxin reductase, putative
PF3D7_1139800	N/A	conserved Plasmodium protein, unknown function
PF3D7_1140300	N/A	P-loop containing nucleoside triphosphate hydrolase, putative
PF3D7_1140400	N/A	conserved Plasmodium protein, unknown function
PF3D7_1140500	MyoK	myosin K, putative
PF3D7_1140600	N/A	conserved Plasmodium protein, unknown function
PF3D7_1140700	N/A	chromo domain-containing protein, putative
PF3D7_1140900	N/A	NdP1 protein, putative
PF3D7_1141100	N/A	conserved Plasmodium protein, unknown function
PF3D7_1141600	DPM1	dolichol-phosphate mannosyltransferase
PF3D7_1141800	N/A	EELM2 domain-containing protein, putative
PF3D7_1142000	N/A	heptatricopeptide repeat-containing protein, putative
PF3D7_1142100	N/A	conserved Plasmodium protein, unknown function
PF3D7_1142200	N/A	conserved Plasmodium protein, unknown function
PF3D7_1142300	N/A	conserved Plasmodium membrane protein, unknown function
PF3D7_1142500	RPL28	60S ribosomal protein L28
PF3D7_1142700	N/A	methyltransferase, putative
PF3D7_1142800	ATPTG6	ATP synthase-associated protein, putative
PF3D7_1143000	N/A	alpha/beta hydrolase, putative
PF3D7_1143100	AP2-O	AP2 domain transcription factor AP2-O
PF3D7_1143200	N/A	DnaJ protein, putative
PF3D7_1143500	N/A	conserved Plasmodium protein, unknown function
PF3D7_1143700	N/A	conserved Plasmodium protein, unknown function
PF3D7_1143800	CAP93	oocyst capsule protein Cap93, putative
PF3D7_1144000	RPS21	40S ribosomal protein S21
PF3D7_1144100	N/A	mitochondrial large subunit ribosomal protein, putative
PF3D7_1144200	N/A	conserved Plasmodium protein, unknown function
PF3D7_1144600	TFG2	transcription initiation factor IIF subunit beta, putative
PF3D7_1144700	TIC20	apicoplast import protein Tic20, putative
PF3D7_1144900	RAB6	ras-related protein Rab-6
PF3D7_1145000	N/A	conserved Plasmodium protein, unknown function
PF3D7_1145200	N/A	serine/threonine protein kinase, putative
PF3D7_1145300	CRIPT	cysteine-rich PDZ-binding protein, putative
PF3D7_1145500	ABCB3	ABC transporter B family member 3, putative
PF3D7_1145600	N/A	TMEM65 domain-containing protein, putative
PF3D7_1145700	N/A	bicoid-interacting protein BIN3, putative
PF3D7_1145800	N/A	conserved Plasmodium protein, unknown function
PF3D7_1146000	RSA4	ribosome assembly protein 4, putative
PF3D7_1146100	N/A	PH-like domain-containing protein, putative
PF3D7_1146500	LRR10	leucine-rich repeat protein
PF3D7_1146800	N/A	conserved Plasmodium protein, unknown function
PF3D7_1147000	SLARP	sporozoite and liver stage asparagine-rich protein
PF3D7_1147200	N/A	tubulin--tyrosine ligase, putative
PF3D7_1147300	N/A	conserved Plasmodium protein, unknown function
PF3D7_1147500	FTB	protein farnesyltransferase subunit beta
PF3D7_1147800	MAEBL	membrane associated erythrocyte binding-like protein
PF3D7_1147900	PEX22	peroxisome assembly protein 22, putative
PF3D7_1148800	N/A	Plasmodium exported protein (hyp11), unknown function
PF3D7_1149100	N/A	Plasmodium exported protein, unknown function
PF3D7_1149200	RESA3	ring-infected erythrocyte surface antigen
PF3D7_1149700	N/A	Plasmodium exported protein (PHISTa), unknown function, fragment
PF3D7_1149800	RIF	rifin
PF3D7_1149900	N/A	stevor
PF3D7_1150400	VAR	erythrocyte membrane protein 1, PfEMP1
PF3D7_1200100	VAR	erythrocyte membrane protein 1, PfEMP1
PF3D7_1200300	RIF	rifin
PF3D7_1200400	VAR	erythrocyte membrane protein 1, PfEMP1
PF3D7_1200600	VAR2CSA	erythrocyte membrane protein 1, PfEMP1
PF3D7_1200610	N/A	VAR2CSA uORF
PF3D7_1200700	ACS7	acyl-CoA synthetase
PF3D7_1200800	FIKK12	serine/threonine protein kinase, FIKK family
PF3D7_1200900	N/A	Plasmodium exported protein (PHISTc), unknown function
PF3D7_1201100	N/A	RESA-like protein with PHIST and DnaJ domains
PF3D7_1201300	LSAP1	liver stage associated protein 1
PF3D7_1201600	NEK3	NIMA related kinase 3
PF3D7_1201800	COX19	cytochrome c oxidase assembly protein COX19, putative
PF3D7_1202000	PSH2	ATP-dependent DNA/RNA helicase PSH2
PF3D7_1202100	SRAP1	SRAP domain-containing protein, putative
PF3D7_1202300	N/A	dynein heavy chain, putative
PF3D7_1202600	NEMF	nuclear export mediator factor NEMF, putative
PF3D7_1203200	SRP14	signal recognition particle subunit SRP14
PF3D7_1203300	N/A	TBCC domain-containing protein, putative
PF3D7_1203400	MFS4	major facilitator superfamily domain-containing protein, putative
PF3D7_1203500	SUA5	threonylcarbamoyl-AMP synthase, putative
PF3D7_1203600	CC1HL	cytochrome c1 heme lyase, putative
PF3D7_1204100	N/A	conserved Plasmodium protein, unknown function
PF3D7_1204400	G37	sexual stage-specific protein G37, putative
PF3D7_1204500	N/A	conserved protein, unknown function
PF3D7_1205000	N/A	conserved protein, unknown function
PF3D7_1205100	SEPSECS	O-phosphoseryl-tRNA(Sec) selenium transferase, putative
PF3D7_1205200	HADO	HAD domain ookinete protein, putative
PF3D7_1205300	N/A	conserved Plasmodium protein, unknown function
PF3D7_1205500	N/A	zinc finger protein, putative
PF3D7_1205900	N/A	conserved protein, unknown function
PF3D7_1206000	SHLP2	shewanella-like protein phosphatase 2
PF3D7_1206100	ISN1	IMP-specific 5'-nucleotidase 1
PF3D7_1206200	EIF3C	eukaryotic translation initiation factor 3 subunit C, putative
PF3D7_1206300	N/A	conserved Plasmodium protein, unknown function
PF3D7_1206400	TUM1	thiosulfate sulfurtransferase, putative
PF3D7_1206700	EIF5	eukaryotic translation initiation factor 5, putative
PF3D7_1206800	N/A	conserved Plasmodium protein, unknown function
PF3D7_1206900	N/A	conserved Plasmodium protein, unknown function
PF3D7_1207100	N/A	pre-rRNA-processing protein ESF1, putative
PF3D7_1207200	N/A	zinc finger protein, putative
PF3D7_1207300	LIMP	LIMP protein, putative
PF3D7_1207700	N/A	41-3 protein
PF3D7_1208100	N/A	conserved Plasmodium protein, unknown function
PF3D7_1208200	CRMP3	cysteine repeat modular protein 3
PF3D7_1208300	mACP	acyl carrier protein, mitochondrial
PF3D7_1208400	N/A	amino acid transporter, putative
PF3D7_1208800	N/A	zinc finger protein, putative
PF3D7_1209100	N/A	conserved Plasmodium protein, unknown function
PF3D7_1209300	TRZ	telomere repeat-binding zinc finger protein
PF3D7_1209400	CIA1	cytosolic iron-sulfur protein assembly protein 1, putative
PF3D7_1209500	PDEalpha	cGMP-specific 3',5'-cyclic phosphodiesterase alpha
PF3D7_1209600	PBGD	porphobilinogen deaminase
PF3D7_1210000	RPL1	50S ribosomal protein L1, apicoplast, putative
PF3D7_1210200	N/A	zinc finger protein, putative
PF3D7_1210300	N/A	conserved Plasmodium protein, unknown function
PF3D7_1210700	N/A	conserved Plasmodium protein, unknown function
PF3D7_1210900	PIGM	GPI mannosyltransferase 1
PF3D7_1211200	N/A	conserved Plasmodium protein, unknown function
PF3D7_1211300	MCM8	DNA helicase MCM8, putative
PF3D7_1211500	mtRPS18	ribosomal protein S18, mitochondrial
PF3D7_1211600	LSD1	lysine-specific histone demethylase 1, putative
PF3D7_1211900	ATP4	non-SERCA-type Ca2+ -transporting P-ATPase
PF3D7_1212000	TPx(Gl)	glutathione peroxidase-like thioredoxin peroxidase
PF3D7_1212100	PPP1	peripheral plastid protein 1, putative
PF3D7_1212200	N/A	conserved protein, unknown function
PF3D7_1212300	N/A	WD repeat-containing protein, putative
PF3D7_1212400	N/A	tetratricopeptide repeat protein, putative
PF3D7_1212500	GAT	glycerol-3-phosphate 1-O-acyltransferase
PF3D7_1212600	N/A	SND2 domain-containing protein, putative
PF3D7_1212800	SDHB	succinate dehydrogenase [ubiquinone] iron-sulfur subunit, mitochondrial
PF3D7_1213500	N/A	integral membrane protein GPR180, putative
PF3D7_1213800	PRS	proline--tRNA ligase
PF3D7_1213900	N/A	W2 domain-containing protein, putative
PF3D7_1214100	PIGO	GPI ethanolamine phosphate transferase 3, putative
PF3D7_1214700	N/A	conserved protein, unknown function
PF3D7_1214900	N/A	conserved protein, unknown function
PF3D7_1215000	Trx-Px2	thioredoxin peroxidase 2
PF3D7_1215200	CYP32	peptidyl-prolyl cis-trans isomerase
PF3D7_1215900	SR10	serpentine receptor 10
PF3D7_1216400	N/A	conserved Plasmodium membrane protein, unknown function
PF3D7_1216600	CelTOS	cell traversal protein for ookinetes and sporozoites
PF3D7_1216900	N/A	DNA-binding chaperone, putative
PF3D7_1217000	N/A	conserved protein, unknown function
PF3D7_1217100	SPO11	meiotic recombination protein SPO11, putative
PF3D7_1217200	MRD1	multiple RNA-binding domain-containing protein 1, putative
PF3D7_1217300	EngA	GTP-binding protein EngA
PF3D7_1217900	N/A	PPPDE peptidase domain-containing protein, putative
PF3D7_1218000	TRAMP	thrombospondin-related apical membrane protein
PF3D7_1218100	N/A	conserved Plasmodium protein, unknown function
PF3D7_1218300	AP2-MU	AP-2 complex subunit mu
PF3D7_1218500	DRPC	dynamin-like protein, putative
PF3D7_1218600	RRS	arginine--tRNA ligase
PF3D7_1218800	PSOP17	secreted ookinete protein, putative
PF3D7_1219000	FRM2	formin 2
PF3D7_1219100	CHC	clathrin heavy chain, putative
PF3D7_1219300	VAR	erythrocyte membrane protein 1, PfEMP1
PF3D7_1219600	ATP2	phospholipid-transporting ATPase 2
PF3D7_1219800	N/A	conserved Plasmodium protein, unknown function
PF3D7_1220000	N/A	zinc finger protein, putative
PF3D7_1220300	N/A	cell cycle associated protein, putative
PF3D7_1220400	DRN1	debranching enzyme-associated ribonuclease, putative
PF3D7_1220500	TSR3	ribosome biogenesis protein TSR3, putative
PF3D7_1220600	N/A	conserved Plasmodium protein, unknown function
PF3D7_1220700	N/A	conserved Plasmodium protein, unknown function
PF3D7_1221000	SET10	histone-lysine N-methyltransferase, H3 lysine-4 specific
PF3D7_1221100	N/A	conserved Plasmodium protein, unknown function
PF3D7_1221300	N/A	conserved Plasmodium protein, unknown function
PF3D7_1221400	IMC1h	inner membrane complex protein 1h, putative
PF3D7_1221700	N/A	FbpA domain protein, putative
PF3D7_1221800	N/A	conserved protein, unknown function
PF3D7_1222000	N/A	tRNA-splicing ligase RtcB, putative
PF3D7_1222300	GRP94	endoplasmin, putative
PF3D7_1222400	ApiAP2	AP2 domain transcription factor
PF3D7_1222500	DPH6	diphthine--ammonia ligase, putative
PF3D7_1222600	AP2-G	AP2 domain transcription factor AP2-G
PF3D7_1222700	GAP45	glideosome-associated protein 45
PF3D7_1222800	N/A	conserved Plasmodium protein, unknown function
PF3D7_1222900	N/A	conserved Plasmodium protein, unknown function
PF3D7_1223100	PKAr	cAMP-dependent protein kinase regulatory subunit
PF3D7_1223200	N/A	nucleus export protein BRR6, putative
PF3D7_1223300	GyrA	DNA gyrase subunit A
PF3D7_1223400	N/A	phospholipid-transporting ATPase, putative
PF3D7_1223500	N/A	conserved Plasmodium protein, unknown function
PF3D7_1223600	N/A	conserved Plasmodium protein, unknown function
PF3D7_1223800	YHM2	citrate/oxoglutarate carrier protein, putative
PF3D7_1224100	N/A	conserved protein, unknown function
PF3D7_1224200	N/A	BRO1 domain-containing protein, putative
PF3D7_1224400	N/A	WD repeat-containing protein, putative
PF3D7_1224500	ASF1	histone chaperone ASF1
PF3D7_1224600	CCHL	cytochrome c heme lyase, putative
PF3D7_1224700	N/A	conserved Plasmodium protein, unknown function
PF3D7_1224800	N/A	conserved protein, unknown function
PF3D7_1225000	N/A	conserved Plasmodium protein, unknown function
PF3D7_1225100	api-IRS	isoleucine--tRNA ligase, putative
PF3D7_1225700	N/A	VAC14 domain-containing protein, putative
PF3D7_1225800	UBA1	ubiquitin-activating enzyme E1
PF3D7_1226000	N/A	conserved protein, unknown function
PF3D7_1226500	N/A	heptatricopeptide repeat and RAP domain-containing protein, putative
PF3D7_1226600	PCNA2	proliferating cell nuclear antigen 2
PF3D7_1226700	RRP9	U3 small nucleolar RNA-interacting protein 2, putative
PF3D7_1226900	PV2	parasitophorous vacuolar protein 2
PF3D7_1227000	N/A	conserved Plasmodium protein, unknown function
PF3D7_1227100	DH60	DNA helicase 60
PF3D7_1227200	K1	potassium channel K1
PF3D7_1227300	N/A	conserved Plasmodium protein, unknown function
PF3D7_1227400	N/A	conserved Plasmodium protein, unknown function
PF3D7_1227500	SOC2	protein SOC2, putative
PF3D7_1227900	RPUSP	RNA pseudouridylate synthase, putative
PF3D7_1228100	LRR13	leucine-rich repeat protein
PF3D7_1228200	N/A	conserved Plasmodium protein, unknown function
PF3D7_1228300	NEK1	NIMA related kinase 1
PF3D7_1228400	N/A	conserved Plasmodium protein, unknown function
PF3D7_1228600	MSP9	merozoite surface protein 9
PF3D7_1228700	N/A	conserved Plasmodium protein, unknown function
PF3D7_1228800	N/A	WD repeat-containing protein, putative
PF3D7_1228900	N/A	conserved protein, unknown function
PF3D7_1229000	N/A	conserved Plasmodium membrane protein, unknown function
PF3D7_1229100	MRP2	multidrug resistance-associated protein 2
PF3D7_1229300	PIC1	PhIL1-interacting candidate PIC1
PF3D7_1229400	MIF	macrophage migration inhibitory factor
PF3D7_1230000	N/A	TBC domain-containing protein, putative
PF3D7_1230300	SPM2	subpellicular microtubule protein 2, putative
PF3D7_1230400	ClpQ	ATP-dependent protease subunit ClpQ
PF3D7_1230500	N/A	WD repeat-containing protein, putative
PF3D7_1230700	SEC13	protein transport protein SEC13
PF3D7_1230900	RIO1	serine/threonine protein kinase RIO1, putative
PF3D7_1231000	N/A	conserved Plasmodium protein, unknown function
PF3D7_1231100	RAB2	ras-related protein Rab-2
PF3D7_1231300	N/A	conserved Plasmodium protein, unknown function
PF3D7_1231900	N/A	WD repeat-containing protein, putative
PF3D7_1232000	aFRS	phenylalanine--tRNA ligase
PF3D7_1232100	CPN60	60 kDa chaperonin
PF3D7_1232200	LPD1	dihydrolipoyl dehydrogenase, mitochondrial
PF3D7_1232500	N/A	CG2-related protein, putative
PF3D7_1232600	N/A	conserved Plasmodium protein, unknown function
PF3D7_1232700	ND9	Nd9 protein
PF3D7_1232800	N/A	conserved Plasmodium protein, unknown function
PF3D7_1232900	N/A	nucleotidyltransferase, putative
PF3D7_1233000	EF-G	elongation factor G
PF3D7_1233200	N/A	conserved Plasmodium protein, unknown function
PF3D7_1233300	PPR2	pentatricopeptide repeat domain-containing protein 2, putative
PF3D7_1233600	AARP1	asparagine and aspartate rich protein 1
PF3D7_1233700	N/A	homocysteine S-methyltransferase, putative
PF3D7_1233900	SENP1	sentrin-specific protease 1
PF3D7_1234000	N/A	conserved Plasmodium protein, unknown function
PF3D7_1234100	BDP5	bromodomain protein 5
PF3D7_1234300	N/A	DNA polymerase epsilon subunit B, putative
PF3D7_1234400	MiGS	microgamete surface protein MiGS, putative
PF3D7_1234500	N/A	conserved Plasmodium protein, unknown function
PF3D7_1234600	TOC75	protein TOC75, putative
PF3D7_1234700	ULG8	upregulated in late gametocytes ULG8
[truncated: 903 more rows]

## Sheet: nrPalmitoylatedProteins
PalmitoylProtein	Name	Product
PF3D7_0100100	VAR	erythrocyte membrane protein 1, PfEMP1
PF3D7_0100300	VAR	erythrocyte membrane protein 1, PfEMP1
PF3D7_0100400	RIF	rifin
PF3D7_0101000	RIF	rifin
PF3D7_0101100	EPF4	exported protein family 4
PF3D7_0101300	MC-2TM	Pfmc-2TM Maurer's cleft two transmembrane protein
PF3D7_0102200	RESA	ring-infected erythrocyte surface antigen
PF3D7_0102500	EBA181	erythrocyte binding antigen-181
PF3D7_0102600	FIKK1	serine/threonine protein kinase, FIKK family
PF3D7_0102700	MaTrA	merozoite-associated tryptophan-rich antigen
PF3D7_0102800	N/A	seipin domain-containing protein, putative
PF3D7_0102900	N/A	aspartate--tRNA ligase
PF3D7_0103200	NT4	nucleoside transporter 4
PF3D7_0103400	N/A	zinc-carboxypeptidase, putative
PF3D7_0103500	N/A	conserved Plasmodium protein, unknown function
PF3D7_0103600	PSH1	ATP-dependent DNA/RNA helicase PSH1
PF3D7_0103700	PSTK	L-seryl-tRNA(Sec) kinase, putative
PF3D7_0103800	ARP1	actin-related protein ARP1, putative
PF3D7_0103900	PIESP15	parasite-infected erythrocyte surface protein
PF3D7_0104100	N/A	protein E140, putative
PF3D7_0104300	UBP1	ubiquitin carboxyl-terminal hydrolase 1, putative
PF3D7_0104400	LytB	4-hydroxy-3-methylbut-2-enyl diphosphate reductase
PF3D7_0104500	N/A	conserved protein, unknown function
PF3D7_0104600	N/A	conserved Plasmodium protein, unknown function
PF3D7_0104700	MFR2	major facilitator superfamily-related transporter, putative
PF3D7_0104800	NPT1	novel putative transporter 1, putative
PF3D7_0105100	N/A	conserved Apicomplexan protein, unknown function
PF3D7_0105200	N/A	heptatricopeptide repeat and RAP domain-containing protein, putative
PF3D7_0105400	N/A	conserved Plasmodium protein, unknown function
PF3D7_0105500	N/A	conserved protein, unknown function
PF3D7_0105600	N/A	FtsJ-like methyltransferase, putative
PF3D7_0105700	N/A	asparagine-rich antigen Pfa35-2
PF3D7_0106100	N/A	V-type proton ATPase subunit C, putative
PF3D7_0106300	ATP6	calcium-transporting ATPase
PF3D7_0106500	N/A	conserved Plasmodium protein, unknown function
PF3D7_0106800	RAB5c	ras-related protein Rab-5C
PF3D7_0107200	CCR4-3	CCR4 domain-containing protein 3, putative
PF3D7_0107300	N/A	conserved Plasmodium protein, unknown function
PF3D7_0107500	NCR1	Niemann-Pick type C1-related protein
PF3D7_0107600	eIK2	eukaryotic translation initiation factor 2-alpha kinase 2, putative
PF3D7_0107700	N/A	dolichyl-diphosphooligosaccharide--protein glycosyltransferase subunit OST3/OST6, putative
PF3D7_0108000	N/A	proteasome subunit beta type-3, putative
PF3D7_0108100	N/A	conserved protein, unknown function
PF3D7_0108300	ARP	conserved Plasmodium protein, unknown function
PF3D7_0108400	N/A	mitochondrial carrier protein, putative
PF3D7_0108600	N/A	DnaJ domain-containing protein, putative
PF3D7_0108700	PSOP24	secreted ookinete protein, putative
PF3D7_0108800	N/A	mitochondrial carrier protein, putative
PF3D7_0109100	CCp5	LCCL domain-containing protein
PF3D7_0109300	N/A	elongation of fatty acids protein, putative
PF3D7_0109850	N/A	phosphatidate cytidylyltransferase, putative
PF3D7_0110000	N/A	conserved Plasmodium protein, unknown function
PF3D7_0110200	ERV1	FAD-linked sulfhydryl oxidase ERV1, putative
PF3D7_0110400	RPB9	DNA-directed RNA polymerase II subunit RPB9, putative
PF3D7_0110500	BDP3	bromodomain protein 3, putative
PF3D7_0110600	PIP5K	phosphatidylinositol-4-phosphate 5-kinase
PF3D7_0111000	N/A	kinesin-8B, putative
PF3D7_0111200	N/A	conserved protein, unknown function
PF3D7_0111400	GEXP19	conserved Plasmodium protein, unknown function
PF3D7_0111600	N/A	conserved Plasmodium protein, unknown function
PF3D7_0112200	MRP1	multidrug resistance-associated protein 1
PF3D7_0112900	N/A	Plasmodium exported protein, unknown function
PF3D7_0113000	GARP	glutamic acid-rich protein GARP
PF3D7_0113200	N/A	Plasmodium exported protein, unknown function
PF3D7_0113800	N/A	DBL containing protein, unknown function
PF3D7_0113900	CBP1	CX3CL1-binding protein 1
PF3D7_0114100	MC-2TM	Pfmc-2TM Maurer's cleft two transmembrane protein
PF3D7_0114500	N/A	Plasmodium exported protein (hyp10), unknown function
PF3D7_0114800	N/A	Plasmodium exported protein (hyp7), unknown function
PF3D7_0115200	RIF	rifin
PF3D7_0115400	N/A	stevor
PF3D7_0115700	VAR	erythrocyte membrane protein 1, PfEMP1
PF3D7_0200100	VAR	erythrocyte membrane protein 1, PfEMP1
PF3D7_0200400	N/A	stevor
PF3D7_0200500	RIF	rifin
PF3D7_0201000	RIF	rifin
PF3D7_0201400	N/A	Plasmodium exported protein (hyp10), unknown function
PF3D7_0201500	N/A	Plasmodium exported protein (hyp9), unknown function
PF3D7_0201600	RLP1	PHISTb domain-containing RESA-like protein 1
PF3D7_0201700	N/A	DnaJ protein, putative
PF3D7_0201800	KAHsp40	knob associated heat shock protein 40
PF3D7_0202000	KAHRP	knob-associated histidine-rich protein
PF3D7_0202100	LSAP2	liver stage associated protein 2
PF3D7_0202300	N/A	Plasmodium exported protein (hyp11), unknown function
PF3D7_0202600	N/A	nucleic acid-binding protein, putative
PF3D7_0202700	OPP	octaprenyl pyrophosphate synthase
PF3D7_0202800	N/A	conserved Plasmodium protein, unknown function
PF3D7_0203000	ROPE	repetitive organellar protein, putative
PF3D7_0203100	N/A	protein kinase, putative
PF3D7_0203300	ERCC1	ERCC1 nucleotide excision repair protein, putative
PF3D7_0203600	N/A	conserved Plasmodium protein, unknown function
PF3D7_0203700	MAK16	protein MAK16, putative
PF3D7_0203800	N/A	conserved Plasmodium protein, unknown function
PF3D7_0203900	N/A	5'-3' exonuclease, putative
PF3D7_0204000	CAPH2	condensin-2 complex subunit H2, putative
PF3D7_0204100	N/A	Sel1 repeat-containing protein, putative
PF3D7_0204200	SEC66	translocation protein SEC66, putative
PF3D7_0204500	AspAT	aspartate transaminase
PF3D7_0204600	N/A	5'-3' exonuclease, putative
PF3D7_0204700	HT1	hexose transporter
PF3D7_0204800	N/A	3'-5' exonuclease, putative
PF3D7_0205000	N/A	conserved Plasmodium protein, unknown function
PF3D7_0205100	N/A	conserved Plasmodium protein, unknown function
PF3D7_0205300	N/A	conserved Plasmodium protein, unknown function
PF3D7_0205400	N/A	PCI domain-containing protein, putative
PF3D7_0205500	N/A	DNA-directed RNA polymerase II 16 kDa subunit, putative
PF3D7_0206100	SufE	cysteine desulfuration protein SufE
PF3D7_0206500	N/A	conserved Plasmodium protein, unknown function
PF3D7_0206600	N/A	DNA-directed RNA polymerase III subunit RPC10, putative
PF3D7_0206900	MSP5	merozoite surface protein 5
PF3D7_0207000	MSP4	merozoite surface protein 4
PF3D7_0207100	N/A	conserved Plasmodium protein, unknown function
PF3D7_0207200	ISCA1	iron-sulfur assembly protein, putative
PF3D7_0207300	SERA8	serine repeat antigen 8
PF3D7_0207400	SERA7	serine repeat antigen 7
PF3D7_0207500	SERA6	serine repeat antigen 6
PF3D7_0207600	SERA5	serine repeat antigen 5
PF3D7_0207700	SERA4	serine repeat antigen 4
PF3D7_0207800	SERA3	serine repeat antigen 3
PF3D7_0208000	SERA1	serine repeat antigen 1
PF3D7_0208100	N/A	conserved Plasmodium protein, unknown function
PF3D7_0208300	N/A	conserved Plasmodium protein, unknown function
PF3D7_0208400	N/A	conserved Plasmodium protein, unknown function
PF3D7_0208800	N/A	protein P22, putative
PF3D7_0209000	P230	6-cysteine protein P230
PF3D7_0209200	MTR3	exosome complex component MTR3, putative
PF3D7_0209400	N/A	ARMT1-like domain-containing protein, putative
PF3D7_0209700	N/A	RING zinc finger protein, putative
PF3D7_0210200	N/A	conserved Plasmodium protein, unknown function
PF3D7_0210300	N/A	monocarboxylate transporter, putative
PF3D7_0210400	N/A	50S ribosomal protein L33, putative
PF3D7_0210500	N/A	conserved Plasmodium protein, unknown function
PF3D7_0210600	CERLI1	protein CERLI1
PF3D7_0210800	N/A	conserved Plasmodium protein, unknown function
PF3D7_0210900	N/A	conserved Plasmodium protein, unknown function
PF3D7_0211100	N/A	conserved Plasmodium protein, unknown function
PF3D7_0211200	RAB5a	ras-related protein Rab-5A
PF3D7_0211300	N/A	ubiquinol-cytochrome-c reductase complex assembly factor 1, putative
PF3D7_0211400	KASIII	beta-ketoacyl-ACP synthase III
PF3D7_0211500	N/A	GAF domain-related protein, putative
PF3D7_0211600	ALG14	UDP-N-acetylglucosamine transferase subunit ALG14, putative
PF3D7_0211700	TKL1	tyrosine kinase-like protein, putative
PF3D7_0211800	AsnRS	asparagine--tRNA ligase
PF3D7_0212000	N/A	GDP-fructose:GMP antiporter, putative
PF3D7_0212100	N/A	conserved Plasmodium protein, unknown function
PF3D7_0212400	N/A	conserved Plasmodium membrane protein, unknown function
PF3D7_0212500	N/A	conserved Plasmodium protein, unknown function
PF3D7_0212600	SPATR	secreted protein with altered thrombospondin repeat domain
PF3D7_0212700	N/A	SRR1-like protein
PF3D7_0212800	MATE	multidrug efflux pump, putative
PF3D7_0212900	ATEL1	arginyl-tRNA--protein transferase
PF3D7_0213100	SIS1	protein SIS1
PF3D7_0213200	N/A	mitochondrial respiratory chain complex II subunit, putative
PF3D7_0213300	N/A	conserved protein, unknown function
PF3D7_0213600	N/A	conserved Plasmodium protein, unknown function
PF3D7_0213700	N/A	conserved protein, unknown function
PF3D7_0213800	N/A	conserved protein, unknown function
PF3D7_0213900	N/A	RTR1 domain-containing protein, putative
PF3D7_0214100	SEC31	protein transport protein SEC31
PF3D7_0214300	N/A	conserved Plasmodium protein, unknown function
PF3D7_0214500	N/A	conserved Plasmodium protein, unknown function
PF3D7_0214600	STK2	serine/threonine protein kinase STK2, putative
PF3D7_0215100	N/A	RING zinc finger protein, putative
PF3D7_0215300	ACS8	acyl-CoA synthetase
PF3D7_0215700	RPB2	DNA-directed RNA polymerase II subunit RPB2, putative
PF3D7_0215900	DHHC11	palmitoyltransferase DHHC11, putative
PF3D7_0216000	N/A	DEAD/DEAH box helicase, putative
PF3D7_0216100	N/A	conserved Plasmodium protein, unknown function
PF3D7_0216200	N/A	Alba domain-containing protein, putative
PF3D7_0216300	N/A	conserved Plasmodium protein, unknown function
PF3D7_0216400	VPS45	vacuolar protein sorting-associated protein 45
PF3D7_0216500	N/A	conserved Plasmodium protein, unknown function
PF3D7_0216600	N/A	sugar transporter, putative
PF3D7_0216700	ATG11	autophagy-related protein 11, putative
PF3D7_0217100	N/A	ATP synthase subunit alpha, mitochondrial
PF3D7_0217300	AP2S	AP-2 complex subunit sigma, putative
PF3D7_0217400	N/A	conserved protein, unknown function
PF3D7_0217500	CDPK1	calcium-dependent protein kinase 1
PF3D7_0217600	N/A	conserved Plasmodium protein, unknown function
PF3D7_0217700	N/A	E2F-associated phosphoprotein, putative
PF3D7_0218200	N/A	SUZ domain-containing protein, putative
PF3D7_0218300	N/A	rRNA methyltransferase, putative
PF3D7_0218600	N/A	patatin-like phospholipase, putative
PF3D7_0219100	N/A	saccharopine dehydrogenase, putative
PF3D7_0219300	N/A	conserved Plasmodium protein, unknown function
PF3D7_0219500	N/A	pseudouridine synthase, putative
PF3D7_0219900	N/A	Plasmodium exported protein, unknown function
PF3D7_0220200	N/A	Plasmodium exported protein, unknown function
PF3D7_0220300	N/A	Plasmodium exported protein, unknown function
PF3D7_0220500	N/A	Plasmodium exported protein (hyp2), unknown function
PF3D7_0220800	CLAG2	cytoadherence linked asexual protein 2
PF3D7_0221000	N/A	Plasmodium exported protein, unknown function
PF3D7_0221400	N/A	stevor
PF3D7_0222100	MC-2TM	Pfmc-2TM Maurer's cleft two transmembrane protein
PF3D7_0223200	RIF	rifin
PF3D7_0223500	VAR	erythrocyte membrane protein 1, PfEMP1
PF3D7_0300100	VAR	erythrocyte membrane protein 1, PfEMP1
PF3D7_0301100	N/A	Plasmodium exported protein (hyp13), unknown function
PF3D7_0301300	EH1	epoxide hydrolase 1
PF3D7_0301400	N/A	Plasmodium exported protein, unknown function
PF3D7_0301500	N/A	Plasmodium exported protein, unknown function
PF3D7_0301900	N/A	conserved protein, unknown function
PF3D7_0302000	PRP46	pre-mRNA-splicing factor PRP46, putative
PF3D7_0302200	CLAG3.2	cytoadherence linked asexual protein 3.2
PF3D7_0302500	CLAG3.1	cytoadherence linked asexual protein 3.1
PF3D7_0302600	ABCB4	ABC transporter B family member 4, putative
PF3D7_0302900	N/A	exportin-1, putative
PF3D7_0303000	NSF	N-ethylmaleimide-sensitive fusion protein
PF3D7_0303100	N/A	CLP1 P-loop domain-containing protein, putative
PF3D7_0303500	N/A	spindle pole body protein, putative
PF3D7_0303600	Plrx	plasmoredoxin
PF3D7_0303700	BCKDH-E2	lipoamide acyltransferase component of branched-chain alpha-keto acid dehydrogenase complex
PF3D7_0303800	N/A	IBR domain protein, putative
PF3D7_0303900	N/A	phosphatidylethanolamine-binding protein, putative
PF3D7_0304000	IMC1a	inner membrane complex protein 1a, putative
PF3D7_0304100	IMC1e	inner membrane complex protein 1e, putative
PF3D7_0304300	N/A	conserved Plasmodium protein, unknown function
PF3D7_0304400	RPL44	60S ribosomal protein L44
PF3D7_0304700	N/A	conserved Plasmodium protein, unknown function
PF3D7_0304800	N/A	conserved Plasmodium membrane protein, unknown function
PF3D7_0305000	EF-Ts	elongation factor Ts
PF3D7_0305100	N/A	conserved Plasmodium protein, unknown function
PF3D7_0305200	N/A	GRIP domain-containing protein, putative
PF3D7_0305300	N/A	transporter, putative
PF3D7_0305400	N/A	conserved protein, unknown function
PF3D7_0305500	N/A	protein dopey homolog, putative
PF3D7_0305800	N/A	P-loop containing nucleoside triphosphate hydrolase, putative
PF3D7_0306200	AHA1	activator of Hsp90 ATPase
PF3D7_0306400	N/A	FAD-dependent glycerol-3-phosphate dehydrogenase, putative
PF3D7_0307500	SKA2	spindle and kinetochore-associated protein 2, putative
PF3D7_0307900	N/A	conserved Plasmodium protein, unknown function
PF3D7_0308000	N/A	DNA polymerase delta small subunit, putative
PF3D7_0308100	N/A	zinc finger protein, putative
PF3D7_0308200	CCT7	T-complex protein 1 subunit eta
PF3D7_0308300	PIC4	PhIL1-interacting candidate PIC4
PF3D7_0308600	PRPF19	pre-mRNA-processing factor 19, putative
PF3D7_0308700	N/A	conserved protein, unknown function
PF3D7_0308900	SF3B1	splicing factor 3B subunit 1, putative
PF3D7_0309000	YVH1	dual specificity protein phosphatase
PF3D7_0309100	OMD	OMD protein, putative
PF3D7_0309300	N/A	N2227-like protein, putative
PF3D7_0309600	PfP2	60S acidic ribosomal protein P2
PF3D7_0309700	SBP2	SECIS-binding protein 2, putative
PF3D7_0309900	N/A	conserved Plasmodium protein, unknown function
PF3D7_0310100	CDPK3	calcium-dependent protein kinase 3
PF3D7_0310200	N/A	phd finger protein, putative
PF3D7_0310300	N/A	phosphoglycerate mutase, putative
PF3D7_0310400	PIESP1	parasite-infected erythrocyte surface protein
PF3D7_0310500	DHX57	ATP-dependent RNA helicase DHX57, putative
PF3D7_0311000	N/A	conserved Plasmodium protein, unknown function
PF3D7_0311200	N/A	valine--tRNA ligase, putative
PF3D7_0311300	N/A	phosphatidylinositol 3- and 4-kinase, putative
PF3D7_0311400	PKRP	kinase-related protein PKRP, putative
PF3D7_0311700	PM6	plasmepsin VI
PF3D7_0311900	N/A	heptatricopeptide repeat-containing protein, putative
PF3D7_0312100	N/A	E3 ubiquitin-protein ligase
PF3D7_0312200	N/A	tetratricopeptide repeat protein, putative
PF3D7_0312300	RPN12	26S proteasome regulatory subunit RPN12, putative
PF3D7_0312900	N/A	hypothetical protein
PF3D7_0313000	N/A	conserved Plasmodium protein, unknown function
PF3D7_0313400	N/A	conserved Plasmodium protein, unknown function
PF3D7_0313500	PfG	Ras-like G protein
PF3D7_0313600	N/A	conserved Plasmodium protein, unknown function
PF3D7_0313700	N/A	conserved Plasmodium protein, unknown function
PF3D7_0313800	N/A	conserved Plasmodium protein, unknown function
PF3D7_0313900	N/A	conserved Plasmodium protein, unknown function
PF3D7_0314000	N/A	HSP20-like chaperone, putative
PF3D7_0314300	DER1-2	DER1-like protein
PF3D7_0314600	N/A	conserved protein, unknown function
PF3D7_0314700	RNF1	RING finger protein RNF1
PF3D7_0315000	N/A	zinc finger protein, putative
PF3D7_0315100	eIF4E	eukaryotic translation initiation factor 4E
PF3D7_0315200	CTRP	circumsporozoite- and TRAP-related protein
PF3D7_0315300	N/A	conserved Plasmodium protein, unknown function
PF3D7_0315400	N/A	conserved Plasmodium protein, unknown function
PF3D7_0315600	N/A	zinc finger protein, putative
PF3D7_0315700	N/A	conserved Plasmodium membrane protein, unknown function
PF3D7_0315800	N/A	zinc finger protein, putative
PF3D7_0315900	N/A	conserved Plasmodium protein, unknown function
PF3D7_0316100	N/A	ribosomal protein L27, mitochondrial, putative
PF3D7_0316200	N/A	conserved Plasmodium protein, unknown function
PF3D7_0316300	PPase	inorganic pyrophosphatase
PF3D7_0316400	N/A	CS domain-containing protein, putative
PF3D7_0316600	FNT	formate-nitrite transporter
PF3D7_0316800	N/A	40S ribosomal protein S15A, putative
PF3D7_0316900	N/A	E3 ubiquitin-protein ligase, putative
PF3D7_0317000	N/A	proteasome subunit alpha type-3, putative
PF3D7_0317100	B9	6-cysteine protein
PF3D7_0317200	CRK4	cdc2-related protein kinase 4
PF3D7_0317400	N/A	DNA replication complex GINS protein, putative
PF3D7_0317500	EG5	kinesin-5
PF3D7_0317700	N/A	CPSF (cleavage and polyadenylation specific factor), subunit A, putative
PF3D7_0317900	N/A	conserved protein, unknown function
PF3D7_0318000	N/A	conserved Plasmodium protein, unknown function
PF3D7_0318200	RPB1	DNA-directed RNA polymerase II subunit RPB1
PF3D7_0318300	N/A	conserved Plasmodium protein, unknown function
PF3D7_0318500	N/A	conserved Plasmodium protein, unknown function
PF3D7_0318900	N/A	conserved protein, unknown function
PF3D7_0319000	ATPase7	P4-type ATPase ATP7, putative
PF3D7_0319200	CCR4-4	CCR4 domain-containing protein 4, putative
PF3D7_0319400	N/A	kinesin-8X
PF3D7_0319700	ABCI3	ABC transporter I family member 1, putative
PF3D7_0319900	N/A	conserved protein, unknown function
PF3D7_0320100	SEC22	protein transport protein SEC22
PF3D7_0320200	N/A	CPW-WPC family protein
PF3D7_0320400	Cap380	oocyst capsule protein Cap380
PF3D7_0320500	Nico	nicotinamidase, putative
PF3D7_0320800	DOZI	ATP-dependent RNA helicase DDX6
PF3D7_0321000	N/A	conserved protein, unknown function
PF3D7_0321100	N/A	conserved Plasmodium protein, unknown function
PF3D7_0321300	N/A	conserved Plasmodium protein, unknown function
PF3D7_0321500	N/A	peptidase, putative
PF3D7_0321600	DDX42	ATP-dependent RNA helicase DDX42, putative
PF3D7_0321700	N/A	conserved Plasmodium protein, unknown function
PF3D7_0321800	N/A	WD repeat-containing protein, putative
PF3D7_0321900	CARL	cyclic amine resistance locus protein
PF3D7_0322200	N/A	conserved protein, unknown function
PF3D7_0322400	N/A	regulator of initiation factor 2 (eIF2)
PF3D7_0322500	IscA2	iron-sulfur assembly protein, putative
PF3D7_0322700	N/A	conserved Plasmodium protein, unknown function
PF3D7_0323100	N/A	conserved Plasmodium protein, unknown function
PF3D7_0323200	N/A	conserved Plasmodium protein, unknown function
PF3D7_0323300	N/A	conserved protein, unknown function
PF3D7_0323400	RIPR	Rh5 interacting protein
PF3D7_0323700	SART1	U4/U6.U5 tri-snRNP-associated protein 1, putative
PF3D7_0324100	MC-2TM	Pfmc-2TM Maurer's cleft two transmembrane protein
PF3D7_0324300	EPF4	exported protein family 4
PF3D7_0324400	RIF	rifin
PF3D7_0324500	RIF	rifin
PF3D7_0400100	VAR	erythrocyte membrane protein 1, PfEMP1
PF3D7_0400400	VAR	erythrocyte membrane protein 1, PfEMP1
PF3D7_0400900	RIF	rifin
PF3D7_0401000	RIF	rifin
PF3D7_0401600	RIF	rifin
PF3D7_0401800	PfD80	Plasmodium exported protein (PHISTb), unknown function
PF3D7_0401900	ACS6	acyl-CoA synthetase
PF3D7_0402000	N/A	Plasmodium exported protein (PHISTa), unknown function
PF3D7_0402100	N/A	Plasmodium exported protein (PHISTb), unknown function
PF3D7_0402400	GEXP18	Plasmodium exported protein, unknown function
PF3D7_0402600	N/A	stevor
PF3D7_0403200	N/A	pre-mRNA splicing factor, putative
PF3D7_0403300	N/A	conserved Plasmodium protein, unknown function
PF3D7_0403400	N/A	conserved Plasmodium protein, unknown function
PF3D7_0403600	N/A	conserved Plasmodium protein, unknown function
PF3D7_0403900	SET8	SET domain protein, putative
PF3D7_0404100	ApiAP2	AP2 domain transcription factor AP2-SP2, putative
PF3D7_0404200	N/A	conserved Plasmodium protein, unknown function
PF3D7_0404500	P52	6-cysteine protein P52
PF3D7_0404600	N/A	conserved Plasmodium membrane protein, unknown function
PF3D7_0404700	DPAP3	dipeptidyl aminopeptidase 3
PF3D7_0404800	N/A	sporozoite-specific protein S10, putative
PF3D7_0405000	DDX51	ATP-dependent RNA helicase DDX51, putative
PF3D7_0405100	SEC24B	protein transport protein Sec24B, putative
PF3D7_0405300	LISP2	liver specific protein 2, putative
PF3D7_0405400	PRPF8	pre-mRNA-processing-splicing factor 8, putative
PF3D7_0405600	N/A	TMEM33 domain-containing protein, putative
PF3D7_0405700	N/A	lysine decarboxylase, putative
PF3D7_0405800	N/A	conserved protein, unknown function
PF3D7_0406500	N/A	NYN domain-containing protein, putative
PF3D7_0406700	N/A	KLRAQ domain-containing protein, putative
PF3D7_0406900	N/A	conserved Plasmodium protein, unknown function
PF3D7_0407100	N/A	methyltransferase, putative
PF3D7_0407200	PTH2	peptidyl-tRNA hydrolase 2, putative
PF3D7_0407300	N/A	transcription factor, putative
PF3D7_0407600	N/A	conserved Plasmodium protein, unknown function
PF3D7_0407700	N/A	conserved Plasmodium protein, unknown function
PF3D7_0408100	N/A	conserved Plasmodium protein, unknown function
PF3D7_0408300	ZRANB2	zinc finger Ran-binding domain-containing protein 2, putative
PF3D7_0408600	SIAP1	sporozoite invasion-associated protein 1
PF3D7_0408700	PLP1	perforin-like protein 1
PF3D7_0408800	N/A	conserved Plasmodium protein, unknown function
PF3D7_0408900	KAE1	tRNA N6-adenosine threonylcarbamoyltransferase
PF3D7_0409000	N/A	conserved Plasmodium protein, unknown function
PF3D7_0409100	PRPF31	U4/U6 small nuclear ribonucleoprotein PRP31, putative
PF3D7_0409200	SOF1	protein SOF1, putative
PF3D7_0409300	N/A	methyltransferase, putative
PF3D7_0409400	DnaJ	chaperone protein DnaJ
PF3D7_0409600	RPA1	replication protein A1, large subunit
PF3D7_0410000	EVP1	erythrocyte vesicle protein 1
PF3D7_0410300	PPM1	protein phosphatase PPM1, putative
PF3D7_0410400	RRP4	exosome complex component RRP4
PF3D7_0410700	RbgA	ribosome biogenesis GTPase A, putative
PF3D7_0410800	N/A	conserved Plasmodium protein, unknown function
PF3D7_0411200	N/A	PP-loop family protein, putative
PF3D7_0411400	N/A	DEAD box ATP-dependent RNA helicase, putative
PF3D7_0411700	N/A	conserved Plasmodium protein, unknown function
PF3D7_0411800	N/A	conserved Plasmodium protein, unknown function
PF3D7_0411900	N/A	DNA polymerase alpha catalytic subunit A
PF3D7_0412400	VAR	erythrocyte membrane protein 1, PfEMP1
PF3D7_0412700	VAR	erythrocyte membrane protein 1, PfEMP1
PF3D7_0413500	PGM2	phosphoglucomutase-2
PF3D7_0413600	RPT3	26S protease regulatory subunit 6B, putative
PF3D7_0413800	N/A	50S ribosomal protein L10, putative
PF3D7_0413900	USP13	ubiquitin carboxyl-terminal hydrolase 13, putative
PF3D7_0414000	SMC3	structural maintenance of chromosomes protein 3
PF3D7_0414100	N/A	conserved Plasmodium membrane protein, unknown function
PF3D7_0414300	N/A	Rab5-interacting protein, putative
PF3D7_0414500	N/A	RNA-binding protein, putative
PF3D7_0414600	APH	acylated pleckstrin-homology domain-containing protein, putative
PF3D7_0414700	N/A	GTP-binding protein, putative
PF3D7_0414900	ARO	armadillo-domain containing rhoptry protein
PF3D7_0415100	N/A	conserved protein, unknown function
PF3D7_0415200	N/A	conserved Plasmodium protein, unknown function
PF3D7_0415300	CRK3	cdc2-related protein kinase 3
PF3D7_0415500	CBP20	nuclear cap-binding protein subunit 2, putative
PF3D7_0415700	N/A	conserved Plasmodium protein, unknown function
PF3D7_0415800	N/A	PhIL1-interacting candidate PIC3
PF3D7_0416300	MCM9	DNA helicase MCM9, putative
PF3D7_0416600	PHBL	prohibitin-like protein PHBL, putative
PF3D7_0416900	N/A	conserved Plasmodium protein, unknown function
PF3D7_0417000	N/A	conserved Plasmodium protein, unknown function
PF3D7_0417200	DHFR-TS	bifunctional dihydrofolate reductase-thymidylate synthase
PF3D7_0417300	N/A	LETM1-like protein, putative
PF3D7_0417400	N/A	conserved Plasmodium protein, unknown function
PF3D7_0417700	N/A	conserved Plasmodium protein, unknown function
PF3D7_0417900	N/A	conserved Plasmodium protein, unknown function
PF3D7_0418000	N/A	conserved Plasmodium protein, unknown function
PF3D7_0418100	SOC1	protein SOC1, putative
PF3D7_0418300	N/A	conserved Plasmodium protein, unknown function
PF3D7_0418500	BET3	trafficking protein particle complex subunit 3, putative
PF3D7_0418600	N/A	regulator of chromosome condensation, putative
PF3D7_0418700	N/A	RNA-binding protein NOB1, putative
PF3D7_0418800	N/A	MOLO1 domain-containing protein, putative
PF3D7_0419100	N/A	conserved Plasmodium protein, unknown function
PF3D7_0419200	GOT1	protein transport protein GOT1, putative
PF3D7_0419300	N/A	conserved Plasmodium protein, unknown function
PF3D7_0419400	N/A	conserved Plasmodium protein, unknown function
PF3D7_0419500	N/A	conserved Plasmodium membrane protein, unknown function
PF3D7_0419700	Pf34	apical merozoite protein
PF3D7_0419900	N/A	phosphatidylinositol 4-kinase, putative
PF3D7_0420000	N/A	zinc finger protein, putative
PF3D7_0420100	RIO2	serine/threonine protein kinase RIO2
PF3D7_0420200	ACPS	holo-[acyl-carrier-protein] synthase, putative
PF3D7_0420300	ApiAP2	AP2 domain transcription factor, putative
PF3D7_0420500	N/A	conserved Plasmodium protein, unknown function
PF3D7_0420600	N/A	conserved Plasmodium protein, unknown function
PF3D7_0420700	VAR	erythrocyte membrane protein 1, PfEMP1
PF3D7_0420900	VAR	erythrocyte membrane protein 1, PfEMP1
PF3D7_0421100	VAR	erythrocyte membrane protein 1, PfEMP1
PF3D7_0421300	VAR	erythrocyte membrane protein 1, PfEMP1
PF3D7_0421700	N/A	conserved Plasmodium protein, unknown function
PF3D7_0421800	N/A	conserved Plasmodium protein, unknown function
PF3D7_0421900	N/A	conserved Plasmodium protein, unknown function
PF3D7_0422200	N/A	erythrocyte membrane-associated antigen
PF3D7_0422300	N/A	alpha tubulin 2
PF3D7_0422500	BRR2	pre-mRNA-splicing helicase BRR2, putative
PF3D7_0422600	N/A	conserved Plasmodium protein, unknown function
PF3D7_0422700	EIF4A3	eukaryotic initiation factor 4A-III, putative
PF3D7_0422800	SR12	serpentine receptor 12, putative
PF3D7_0423200	N/A	BSD-domain protein, putative
PF3D7_0423500	GAPM2	glideosome associated protein with multiple membrane spans 2
PF3D7_0423800	CyRPA	cysteine-rich protective antigen
PF3D7_0424000	N/A	Plasmodium exported protein (PHISTc), unknown function
PF3D7_0424400	SURF4.2	surface-associated interspersed protein 4.2 (SURFIN 4.2)
PF3D7_0424500	FIKK4.1	serine/threonine protein kinase, FIKK family
PF3D7_0425500	N/A	stevor
PF3D7_0425800	VAR	erythrocyte membrane protein 1, PfEMP1
PF3D7_0426000	VAR	erythrocyte membrane protein 1, PfEMP1
PF3D7_0500100	VAR	erythrocyte membrane protein 1, PfEMP1
PF3D7_0500500	RIF	rifin
PF3D7_0500800	MESA	mature parasite-infected erythrocyte surface antigen
PF3D7_0500900	FIKK5	serine/threonine protein kinase, FIKK family
PF3D7_0501000	N/A	Plasmodium exported protein, unknown function
PF3D7_0501300	SBP1	skeleton-binding protein 1
PF3D7_0501500	RAP3	rhoptry-associated protein 3
PF3D7_0501600	RAP2	rhoptry-associated protein 2
PF3D7_0501700	APC3	anaphase-promoting complex subunit 3, putative
PF3D7_0501800	CAF1A	chromatin assembly factor 1 subunit A
PF3D7_0502000	VPS11	vacuolar protein sorting-associated protein 11, putative
PF3D7_0502300	N/A	conserved Plasmodium protein, unknown function
PF3D7_0502500	N/A	conserved Plasmodium protein, unknown function
PF3D7_0502600	N/A	conserved Plasmodium protein, unknown function
PF3D7_0502700	N/A	conserved protein, unknown function
PF3D7_0502800	N/A	DnaJ protein, putative
PF3D7_0503100	IspE	4-diphosphocytidyl-2-C-methyl-D-erythritol kinase, putative
PF3D7_0503200	CDC6	cell division control protein 6, putative
PF3D7_0503600	MyoB	myosin B
PF3D7_0504000	ATPase3	cation transporting P-ATPase
PF3D7_0504100	N/A	AN1-type zinc finger protein, putative
PF3D7_0504500	N/A	MOLO1 domain-containing protein, putative
PF3D7_0504600	BCKDHB	2-oxoisovalerate dehydrogenase subunit beta, mitochondrial, putative
PF3D7_0504800	N/A	conserved Plasmodium protein, unknown function
PF3D7_0505000	N/A	MMS19-like protein, putative
PF3D7_0505100	TRS85	trafficking protein particle complex subunit 8, putative
PF3D7_0505300	N/A	UDP-N-acetylglucosamine transporter, putative
PF3D7_0505500	MSH6	DNA mismatch repair protein MSH6, putative
PF3D7_0505700	N/A	conserved Plasmodium membrane protein, unknown function
PF3D7_0506000	N/A	conserved Plasmodium protein, unknown function
PF3D7_0506100	N/A	60S ribosomal subunit protein L24, putative
PF3D7_0506500	N/A	conserved Plasmodium protein, unknown function
PF3D7_0506700	N/A	GTPase-activating protein, putative
PF3D7_0506900	ROM4	rhomboid protease ROM4
PF3D7_0507000	N/A	conserved protein, unknown function
PF3D7_0507300	SOPT	subtilisin-like ookinete protein SOPT
PF3D7_0507400	SUB1-ProM	subtilisin propeptide-like protein
PF3D7_0507500	SUB1	subtilisin-like protease 1
PF3D7_0507700	NPL4	nuclear protein localization protein 4, putative
PF3D7_0507900	N/A	conserved Plasmodium protein, unknown function
PF3D7_0508000	P38	6-cysteine protein
PF3D7_0508200	N/A	longevity-assurance (LAG1) protein, putative
PF3D7_0508500	ND6	ND6 protein, putative
PF3D7_0508700	PRP5	pre-mRNA-processing ATP-dependent RNA helicase PRP5, putative
PF3D7_0508900	AAP6	protein AAP6
PF3D7_0509000	alphaSNAP	alpha-soluble NSF attachment protein, putative
PF3D7_0509100	SMC4	structural maintenance of chromosomes protein 4, putative
PF3D7_0509400	RNAPI	RNA polymerase I
PF3D7_0509500	N/A	ERCC4 domain-containing protein, putative
PF3D7_0509600	AsnRS	asparagine--tRNA ligase
PF3D7_0509800	PI4KB	phosphatidylinositol 4-kinase beta
PF3D7_0509900	N/A	NSE4 domain-containing protein, putative
PF3D7_0510000	N/A	conserved Plasmodium protein, unknown function
PF3D7_0510100	N/A	KH domain-containing protein, putative
PF3D7_0510200	CYP87	peptidyl-prolyl cis-trans isomerase
PF3D7_0510400	N/A	PDCD2 domain-containing protein, putative
PF3D7_0510500	TopoI	topoisomerase I
PF3D7_0511000	TCTP	translationally-controlled tumor protein homolog
PF3D7_0511100	N/A	conserved Plasmodium protein, unknown function
PF3D7_0511200	SCD	stearoyl-CoA desaturase
PF3D7_0511300	N/A	MORN repeat protein, putative
PF3D7_0511400	N/A	conserved Plasmodium protein, unknown function
PF3D7_0511500	N/A	RNA pseudouridylate synthase, putative
PF3D7_0511600	ARNP	apical rhoptry neck protein
PF3D7_0512000	PFD6	prefoldin subunit 6
PF3D7_0512200	GS	glutathione synthetase
PF3D7_0512300	MAT1	CDK-activating kinase assembly factor MAT1
PF3D7_0512500	N/A	conserved Plasmodium protein, unknown function
PF3D7_0512600	RAB1b	ras-related protein Rab-1B
PF3D7_0512700	OPRT	orotate phosphoribosyltransferase
PF3D7_0513000	N/A	conserved protein, unknown function
PF3D7_0513200	N/A	CPSF domain-containing protein, putative
PF3D7_0513600	N/A	deoxyribodipyrimidine photo-lyase, putative
PF3D7_0513700	PSOP12	secreted ookinete protein, putative
PF3D7_0514100	UvrD	ATP-dependent DNA helicase UvrD
PF3D7_0514200	N/A	conserved Plasmodium protein, unknown function
PF3D7_0514300	N/A	aspartate--tRNA ligase, putative
PF3D7_0514700	N/A	MORN repeat protein, putative
PF3D7_0514900	N/A	conserved Plasmodium protein, unknown function
PF3D7_0515000	CWC2	pre-mRNA-splicing factor CWC2, putative
PF3D7_0515100	ROM9	rhomboid protease ROM9
PF3D7_0515300	PI3K	phosphatidylinositol 3-kinase
PF3D7_0515500	GEP1	gametogenesis essential protein 1, putative
PF3D7_0516000	N/A	RAP protein, putative
PF3D7_0516100	ATPase1	cation-transporting ATPase 1
PF3D7_0516500	MFS1	major facilitator superfamily domain-containing protein, putative
PF3D7_0516700	N/A	ubiquitin carboxyl-terminal hydrolase 2, putative
PF3D7_0516800	ApiAP2	AP2 domain transcription factor AP2-O2, putative
PF3D7_0517100	N/A	conserved protein, unknown function
PF3D7_0517200	N/A	conserved Plasmodium protein, unknown function
PF3D7_0517400	FACT-L	FACT complex subunit SPT16, putative
PF3D7_0517500	N/A	UTP--glucose-1-phosphate uridylyltransferase, putative
PF3D7_0517600	CPbeta	F-actin-capping protein subunit beta, putative
PF3D7_0517700	EIF3B	eukaryotic translation initiation factor 3 subunit B, putative
PF3D7_0517800	DCX	apicortin
PF3D7_0518000	N/A	NOSIP domain-containing protein, putative
PF3D7_0518600	WDR26	WD repeat-containing protein 26, putative
PF3D7_0518700	PUF1	mRNA-binding protein PUF1
PF3D7_0518800	PSOP13	secreted ookinete protein, putative
PF3D7_0518900	N/A	conserved protein, unknown function
PF3D7_0519300	COX10	protoheme IX farnesyltransferase
PF3D7_0519500	CCR4-1	CCR4 domain-containing protein 1, putative
PF3D7_0519600	N/A	zinc finger protein, putative
PF3D7_0519900	N/A	conserved protein, unknown function
PF3D7_0520100	PPM9	protein phosphatase PPM9, putative
PF3D7_0520500	N/A	phosphomethylpyrimidine kinase, putative
PF3D7_0520600	Ap4AH	bis(5'-nucleosyl)-tetraphosphatase [asymmetrical]
PF3D7_0520800	N/A	conserved protein, unknown function
PF3D7_0520900	SAHH	adenosylhomocysteinase
PF3D7_0521100	N/A	conserved Plasmodium protein, unknown function
PF3D7_0521300	N/A	zinc finger protein, putative
PF3D7_0521700	DDX1	ATP-dependent RNA helicase DDX1, putative
PF3D7_0521800	N/A	AFG1-like ATPase, putative
PF3D7_0522100	N/A	conserved Plasmodium protein, unknown function
PF3D7_0522400	N/A	conserved Plasmodium protein, unknown function
PF3D7_0522500	RPL17	50S ribosomal protein L17, apicoplast, putative
PF3D7_0522600	N/A	magnesium transporter NIPA, putative
PF3D7_0522700	SufA	iron-sulfur cluster assembly protein SufA
PF3D7_0522800	BUD31	pre-mRNA-splicing factor BUD31, putative
PF3D7_0522900	N/A	zinc finger protein, putative
PF3D7_0523000	MDR1	multidrug resistance protein 1
PF3D7_0523200	N/A	heptatricopeptide repeat-containing protein, putative
PF3D7_0523700	N/A	conserved Plasmodium membrane protein, unknown function
PF3D7_0523800	N/A	divalent metal transporter, putative
PF3D7_0523900	N/A	MerC domain-containing protein, putative
PF3D7_0524000	KASbeta	karyopherin beta
PF3D7_0524100	N/A	conserved Plasmodium protein, unknown function
PF3D7_0524200	N/A	conserved Plasmodium membrane protein, unknown function
PF3D7_0524600	N/A	50S ribosomal protein L12, apicoplast, putative
PF3D7_0524800	UFD1	ubiquitin fusion degradation protein 1, putative
PF3D7_0524900	TYW1	S-adenosyl-L-methionine-dependent tRNA 4-demethylwyosine synthase, putative
PF3D7_0525100	ACS10	acyl-CoA synthetase
PF3D7_0525500	N/A	WD repeat-containing protein, putative
PF3D7_0525600	N/A	RNA methyltransferase, putative
PF3D7_0525800	IMC1g	inner membrane complex protein 1g, putative
PF3D7_0526000	N/A	RAP protein, putative
PF3D7_0526100	N/A	conserved Plasmodium membrane protein, unknown function
PF3D7_0526300	WDR55	WD repeat-containing protein 55, putative
PF3D7_0526500	N/A	conserved Plasmodium protein, unknown function
PF3D7_0526600	N/A	conserved Plasmodium protein, unknown function
PF3D7_0527400	N/A	conserved Plasmodium protein, unknown function
PF3D7_0527500	HIP	Hsc70-interacting protein
PF3D7_0528100	N/A	AP-1/2 complex subunit beta, putative
PF3D7_0528400	DHHC7	palmitoyltransferase DHHC7
PF3D7_0528500	CPalpha	F-actin-capping protein subunit alpha, putative
PF3D7_0528700	CYP23	peptidyl-prolyl cis-trans isomerase
PF3D7_0528800	N/A	nuclear GTP-binding protein, putative
PF3D7_0528900	N/A	conserved protein, unknown function
PF3D7_0529000	TIP	T-cell immunomodulatory protein homolog, putative
PF3D7_0529100	ATrx2	thioredoxin-like protein, putative
PF3D7_0529200	N/A	sugar transporter, putative
PF3D7_0529300	TIC22	apicoplast TIC22 protein
PF3D7_0529800	N/A	conserved Plasmodium protein, unknown function
PF3D7_0530400	N/A	conserved Plasmodium protein, unknown function
PF3D7_0530500	N/A	conserved Plasmodium membrane protein, unknown function
PF3D7_0530700	N/A	conserved Plasmodium protein, unknown function
PF3D7_0530800	N/A	CPW-WPC family protein
PF3D7_0530900	FRM1	formin 1
PF3D7_0531100	N/A	conserved Plasmodium protein, unknown function
PF3D7_0531200	N/A	ribosomal protein S16, mitochondrial, putative
PF3D7_0532200	N/A	Plasmodium exported protein (PHISTc), unknown function
PF3D7_0532300	N/A	Plasmodium exported protein (PHISTb), unknown function
PF3D7_0532900	RIF	rifin
PF3D7_0600200	VAR	erythrocyte membrane protein 1, PfEMP1
PF3D7_0600500	RIF	rifin
PF3D7_0600600	VAR	erythrocyte membrane protein 1 (PfEMP1), exon 2
PF3D7_0601000	EPF4	exported protein family 4
PF3D7_0601200	MC-2TM	Pfmc-2TM Maurer's cleft two transmembrane protein
PF3D7_0601500	N/A	Plasmodium exported protein (PHISTb), unknown function
PF3D7_0601600	N/A	tetratricopeptide repeat protein, putative
PF3D7_0602000	N/A	zinc finger protein, putative
PF3D7_0602100	MTR4	ATP-dependent RNA helicase MTR4
PF3D7_0602200	N/A	MYND-type zinc finger protein, putative
PF3D7_0602300	PALM	liver merozoite formation protein, putative
PF3D7_0602400	EF-G	elongation factor G
PF3D7_0602700	N/A	conserved Plasmodium protein, unknown function
PF3D7_0602900	N/A	conserved Plasmodium protein, unknown function
PF3D7_0603000	N/A	SDE2 domain-containing protein, putative
PF3D7_0603300	DHODH	dihydroorotate dehydrogenase
PF3D7_0603600	N/A	AT-rich interactive domain-containing protein, putative
PF3D7_0603800	CEP76	NdP2 protein, putative
PF3D7_0603900	N/A	conserved Plasmodium protein, unknown function
PF3D7_0604000	N/A	conserved Plasmodium protein, unknown function
PF3D7_0604100	SIP2	AP2 domain transcription factor
PF3D7_0604400	N/A	conserved protein, unknown function
PF3D7_0604500	N/A	GYF domain-containing protein, putative
PF3D7_0604600	N/A	DNA helicase, putative
PF3D7_0604700	GILP	glyoxalase I-like protein GILP
PF3D7_0604800	N/A	RAP protein, putative
PF3D7_0605300	ARK1	serine/threonine protein kinase ARK1
PF3D7_0605800	RAD50	DNA repair protein RAD50, putative
PF3D7_0605900	N/A	elongation of fatty acids protein, putative
PF3D7_0606100	N/A	RNA-binding protein, putative
PF3D7_0606500	PTB	polypyrimidine tract-binding protein, putative
PF3D7_0606600	N/A	conserved Plasmodium protein, unknown function
PF3D7_0606700	N/A	coatomer alpha subunit, putative
PF3D7_0606800	VFT1	VFT protein
PF3D7_0607200	N/A	RING zinc finger protein, putative
PF3D7_0607300	UROD	uroporphyrinogen III decarboxylase
PF3D7_0607400	N/A	G-protein associated signal transduction protein, putative
PF3D7_0607500	COQ2	4-hydroxybenzoate polyprenyltransferase, putative
PF3D7_0607600	SAS6	spindle assembly abnormal protein 6, putative
PF3D7_0607700	N/A	conserved Plasmodium protein, unknown function
PF3D7_0607900	N/A	conserved Plasmodium protein, unknown function
PF3D7_0608000	DPH7	diphthine methyltransferase, putative
PF3D7_0608100	N/A	conserved Plasmodium protein, unknown function
PF3D7_0608200	N/A	conserved Plasmodium protein, unknown function
PF3D7_0608300	N/A	heptatricopeptide repeat-containing protein, putative
PF3D7_0608310	SAM50	sorting assembly machinery 50 kDa subunit, putative
PF3D7_0608600	N/A	conserved Plasmodium protein, unknown function
PF3D7_0608700	CCT6	T-complex protein 1 subunit zeta
PF3D7_0608900	N/A	conserved Plasmodium protein, unknown function
PF3D7_0609000	NUP637	nucleoporin NUP637, putative
PF3D7_0609100	ZIP1	zinc transporter ZIP1, putative
PF3D7_0609200	N/A	citrate synthase-like protein, putative
PF3D7_0609300	N/A	conserved Plasmodium protein, unknown function
PF3D7_0609500	N/A	conserved Plasmodium protein, unknown function
PF3D7_0609600	N/A	conserved Plasmodium protein, unknown function
PF3D7_0609700	KIC6	protein KIC6
PF3D7_0609800	DHHC2	palmitoyltransferase DHHC2, putative
PF3D7_0609900	N/A	conserved Plasmodium protein, unknown function
PF3D7_0610000	N/A	ribosomal protein L19, mitochondrial, putative
PF3D7_0610100	SLU7	pre-mRNA-splicing factor SLU7, putative
PF3D7_0610200	RBM25	RNA-binding protein 25, putative
PF3D7_0610700	N/A	conserved Plasmodium protein, unknown function
PF3D7_0611200	AP2-EXP2	AP2 domain transcription factor AP2-EXP2
PF3D7_0611400	SWIB	SWI/SNF-related matrix-associated actin-dependent regulator of chromatin
PF3D7_0611700	RPL39	60S ribosomal protein L39
PF3D7_0611800	N/A	conserved Plasmodium protein, unknown function
PF3D7_0612100	EIF3L	eukaryotic translation initiation factor 3 subunit L, putative
PF3D7_0612200	LRR6	leucine-rich repeat protein
PF3D7_0612300	TMEM234	transmembrane protein 234, putative
PF3D7_0612400	N/A	conserved Plasmodium protein, unknown function
PF3D7_0612600	NCS6	cytoplasmic tRNA 2-thiolation protein 1, putative
PF3D7_0612700	P12	6-cysteine protein P12
PF3D7_0612800	P12p	6-cysteine protein P12p
PF3D7_0612900	NOG1	nucleolar GTP-binding protein 1, putative
PF3D7_0613000	N/A	conserved Plasmodium protein, unknown function
PF3D7_0613200	N/A	conserved Plasmodium protein, unknown function
PF3D7_0613600	N/A	conserved Plasmodium protein, unknown function
PF3D7_0613700	N/A	syntaxin-binding protein, putative
PF3D7_0613800	ApiAP2	AP2 domain transcription factor, putative
PF3D7_0613900	MyoE	myosin E, putative
PF3D7_0614200	NAR1	cytosolic Fe-S cluster assembly factor NAR1, putative
PF3D7_0614300	MFR1	major facilitator superfamily-related transporter, putative
PF3D7_0614500	RPL19	60S ribosomal protein L19
PF3D7_0614600	N/A	conserved Plasmodium protein, unknown function
PF3D7_0614900	N/A	conserved Plasmodium membrane protein, unknown function
PF3D7_0615100	ENR	enoyl-acyl carrier reductase
PF3D7_0615300	GWT1	GPI-anchored wall transfer protein 1, putative
PF3D7_0615400	N/A	ribonuclease, putative
PF3D7_0615500	CRK5	cdc2-related protein kinase 5
PF3D7_0615600	N/A	zinc finger protein, putative
PF3D7_0615900	N/A	protein phosphatase, putative
PF3D7_0616300	N/A	conserved Plasmodium protein, unknown function
PF3D7_0616400	N/A	conserved Plasmodium protein, unknown function
PF3D7_0616500	TLP	TRAP-like protein
PF3D7_0616600	N/A	conserved protein, unknown function
PF3D7_0616800	MQO	malate:quinone oxidoreductase
PF3D7_0617000	TOM40	mitochondrial import receptor subunit TOM40, putative
PF3D7_0617100	N/A	AP-2 complex subunit alpha, putative
PF3D7_0617400	VAR	erythrocyte membrane protein 1, PfEMP1
PF3D7_0618000	N/A	conserved Plasmodium membrane protein, unknown function
PF3D7_0618100	N/A	conserved Plasmodium protein, unknown function
PF3D7_0618500	MDH	malate dehydrogenase
PF3D7_0618800	N/A	heptatricopeptide repeat-containing protein, putative
PF3D7_0618900	GPI1	phosphatidylinositol N-acetylglucosaminyltransferase subunit GPI1
PF3D7_0619000	N/A	FPL domain-containing protein, putative
PF3D7_0619300	N/A	conserved Plasmodium protein, unknown function
PF3D7_0619500	ACS12	acyl-CoA synthetase
PF3D7_0619600	N/A	conserved Plasmodium protein, unknown function
PF3D7_0619800	N/A	conserved Plasmodium membrane protein, unknown function
PF3D7_0619900	SF3A2	splicing factor 3A subunit 2, putative
PF3D7_0620300	N/A	conserved Plasmodium protein, unknown function
PF3D7_0620400	MSP10	merozoite surface protein 10
PF3D7_0620500	N/A	cleavage stimulation factor subunit 1, putative
PF3D7_0620600	N/A	conserved Plasmodium protein, unknown function
PF3D7_0620700	N/A	DnaJ protein, putative
PF3D7_0621000	N/A	conserved Plasmodium protein, unknown function
PF3D7_0621100	N/A	conserved Plasmodium protein, unknown function
PF3D7_0621200	PDX1	pyridoxine biosynthesis protein PDX1
PF3D7_0621300	PUF3	mRNA-binding protein PUF3
PF3D7_0621350	SYS1	protein SYS1, putative
PF3D7_0621400	ALV7	Pf77 protein
PF3D7_0621700	N/A	RAP protein, putative
PF3D7_0621800	N/A	nascent polypeptide-associated complex subunit alpha, putative
PF3D7_0622100	N/A	conserved Plasmodium protein, unknown function
PF3D7_0622200	MIAB	tRNA-2-methylthio-N(6)-dimethylallyladenosine synthase
PF3D7_0622800	N/A	leucine--tRNA ligase, putative
PF3D7_0622900	AP2Tel	AP2 domain transcription factor AP2Tel
PF3D7_0623100	NAB2	nuclear polyadenylated RNA-binding protein NAB2, putative
PF3D7_0623200	FNR	ferredoxin--NADP reductase
PF3D7_0623300	N/A	EGF-like membrane protein, putative
PF3D7_0623500	SOD2	superoxide dismutase [Fe]
PF3D7_0623600	N/A	splicing factor-like protein 1, putative
PF3D7_0623700	SUV3	ATP-dependent RNA helicase SUV3, putative
PF3D7_0623800	TKL4	tyrosine kinase-like protein, putative
PF3D7_0624000	HK	hexokinase
PF3D7_0624300	N/A	CPW-WPC family protein
PF3D7_0624400	N/A	conserved protein, unknown function
PF3D7_0624500	APC11	anaphase-promoting complex subunit 11, putative
PF3D7_0624600	ISWI	ISWI chromatin-remodeling complex ATPase
PF3D7_0625000	SMS1	sphingomyelin synthase 1, putative
PF3D7_0625100	SMS2	sphingomyelin synthase 2, putative
PF3D7_0625300	MtDNAP	mitochondrial DNA polymerase
PF3D7_0625400	N/A	conserved Plasmodium protein, unknown function
PF3D7_0625700	N/A	conserved protein, unknown function
PF3D7_0626000	N/A	conserved Plasmodium protein, unknown function
PF3D7_0626200	N/A	conserved Plasmodium protein, unknown function
PF3D7_0626400	N/A	CRAL/TRIO domain-containing protein, putative
PF3D7_0626800	PyrK	pyruvate kinase
PF3D7_0627000	N/A	conserved Plasmodium protein, unknown function
PF3D7_0627100	N/A	ankyrin-repeat protein, putative
PF3D7_0627300	RNF5	E3 ubiquitin-protein ligase RNF5, putative
PF3D7_0627600	N/A	conserved Plasmodium protein, unknown function
PF3D7_0627700	N/A	transportin
PF3D7_0627800	ACAS	acetyl-CoA synthetase
PF3D7_0628100	HECT1	HECT domain-containing protein 1, putative
PF3D7_0628200	PK4	eukaryotic translation initiation factor 2-alpha kinase
PF3D7_0628300	CEPT	choline/ethanolaminephosphotransferase, putative
PF3D7_0628400	N/A	protease, putative
PF3D7_0628500	N/A	conserved Plasmodium protein, unknown function
PF3D7_0628800	GATB	glutamyl-tRNA(Gln) amidotransferase subunit B
PF3D7_0628900	N/A	RAP protein, putative
PF3D7_0629200	N/A	DnaJ protein, putative
PF3D7_0629700	SET1	SET domain protein, putative
PF3D7_0629800	N/A	cullin-2, putative
PF3D7_0630100	N/A	alpha/beta hydrolase, putative
PF3D7_0630200	PSOP6	secreted ookinete protein, putative
PF3D7_0630300	N/A	DNA polymerase epsilon catalytic subunit A, putative
PF3D7_0630600	N/A	deubiquitinating enzyme MINDY, putative
PF3D7_0630700	N/A	bifunctional methylenetetrahydrofolate dehydrogenase/cyclohydrolase, putative
PF3D7_0630800	N/A	TPH domain-containing protein, putative
PF3D7_0630900	HAS1	ATP-dependent RNA helicase HAS1
PF3D7_0631000	N/A	tetratricopeptide repeat protein, putative
PF3D7_0631100	N/A	Plasmodium exported protein (PHISTb), unknown function
PF3D7_0631400	MC-2TM	Pfmc-2TM Maurer's cleft two transmembrane protein
PF3D7_0631600	EPF4	exported protein family 4
PF3D7_0631800	RIF	rifin
PF3D7_0632300	RIF	rifin
PF3D7_0632500	VAR	erythrocyte membrane protein 1, PfEMP1
PF3D7_0632800	VAR	erythrocyte membrane protein 1, PfEMP1
PF3D7_0700100	VAR	erythrocyte membrane protein 1, PfEMP1
PF3D7_0700500	RIF	rifin
PF3D7_0700800	MC-2TM	Pfmc-2TM Maurer's cleft two transmembrane protein
PF3D7_0701600	MC-2TM	Pfmc-2TM Maurer's cleft two transmembrane protein
PF3D7_0701900	N/A	Plasmodium exported protein, unknown function
PF3D7_0702200	LPL20	lysophospholipase LPL20
PF3D7_0702500	N/A	Plasmodium exported protein, unknown function
PF3D7_0703000	N/A	conserved Plasmodium protein, unknown function
PF3D7_0703200	N/A	conserved Plasmodium protein, unknown function
PF3D7_0703400	N/A	conserved Plasmodium protein, unknown function
PF3D7_0703500	N/A	erythrocyte membrane-associated antigen
PF3D7_0703800	N/A	conserved Plasmodium protein, unknown function
PF3D7_0703900	N/A	conserved Plasmodium membrane protein, unknown function
PF3D7_0704000	N/A	conserved Plasmodium membrane protein, unknown function
PF3D7_0704100	BTP2	basal complex transmembrane protein 2
PF3D7_0704200	NSUN1	RNA cytosine C(5)-methyltransferase, putative
PF3D7_0704400	N/A	phosphoinositide-binding protein, putative
PF3D7_0704500	N/A	serine/threonine protein kinase, putative
PF3D7_0704600	UT	HECT-type E3 ubiquitin ligase UT
PF3D7_0704700	PPAT	phosphopantetheine adenylyltransferase, putative
PF3D7_0704800	PPM12	protein phosphatase PPM12, putative
PF3D7_0705000	N/A	mRNA cap guanine-N7 methyltransferase, putative
PF3D7_0705200	N/A	conserved Plasmodium protein, unknown function
PF3D7_0705400	MCM7	DNA replication licensing factor MCM7
PF3D7_0705500	N/A	inositol-phosphate phosphatase, putative
PF3D7_0705700	N/A	40S ribosomal protein S29, putative
PF3D7_0705800	CRISP	cysteine-rich secretory protein
PF3D7_0706000	N/A	importin-7, putative
PF3D7_0706100	N/A	conserved Plasmodium protein, unknown function
PF3D7_0706400	RPL37	60S ribosomal protein L37
PF3D7_0706500	N/A	conserved Plasmodium protein, unknown function
PF3D7_0706600	N/A	conserved Plasmodium protein, unknown function
PF3D7_0706700	MSH2-2	DNA mismatch repair protein MSH2, putative
PF3D7_0707200	N/A	conserved Plasmodium protein, unknown function
PF3D7_0707500	N/A	conserved Plasmodium protein, unknown function
PF3D7_0707700	N/A	E3 ubiquitin-protein ligase, putative
PF3D7_0708000	N/A	cytoskeleton associated protein, putative
PF3D7_0708100	RPB10	DNA-directed RNA polymerases I, II, and III subunit RPABC5, putative
PF3D7_0708200	N/A	conserved Plasmodium protein, unknown function
PF3D7_0708300	BUD32	EKC/KEOPS complex subunit BUD32
PF3D7_0708400	HSP90	heat shock protein 90
PF3D7_0708600	IMC1d	inner membrane complex protein 1d, putative
PF3D7_0708900	SCO1	protein SCO1, putative
PF3D7_0709100	N/A	Cg1 protein
PF3D7_0709200	GLP3	glutaredoxin-like protein
PF3D7_0709400	N/A	Cg7 protein
PF3D7_0709600	POP1	ribonucleases P/MRP protein subunit POP1, putative
PF3D7_0709800	N/A	conserved protein, unknown function
PF3D7_0709900	N/A	hydrolase, putative
PF3D7_0710000	N/A	conserved Plasmodium protein, unknown function
PF3D7_0710200	N/A	conserved Plasmodium protein, unknown function
PF3D7_0710300	N/A	conserved protein, unknown function
PF3D7_0710500	N/A	conserved protein, unknown function
PF3D7_0710800	USE1	protein transport protein USE1, putative
PF3D7_0710900	RPL1	50S ribosomal protein L1, mitochondrial, putative
PF3D7_0711100	N/A	conserved protein, unknown function
PF3D7_0711200	N/A	conserved Plasmodium protein, unknown function
PF3D7_0711500	N/A	regulator of chromosome condensation, putative
PF3D7_0711700	VAR	erythrocyte membrane protein 1, PfEMP1
PF3D7_0712000	VAR	erythrocyte membrane protein 1, PfEMP1
PF3D7_0712600	VAR	erythrocyte membrane protein 1, PfEMP1
PF3D7_0712900	VAR	erythrocyte membrane protein 1, PfEMP1
PF3D7_0713000	RIF	rifin
PF3D7_0713100	MC-2TM	Pfmc-2TM Maurer's cleft two transmembrane protein
PF3D7_0713400	SR25	GPCR-like receptor SR25
PF3D7_0713500	N/A	conserved Plasmodium protein, unknown function
PF3D7_0713600	N/A	ribosomal protein S5, mitochondrial, putative
PF3D7_0713700	N/A	conserved Plasmodium protein, unknown function
PF3D7_0713800	NELFA	negative elongation factor A, putative
PF3D7_0713900	N/A	conserved Plasmodium protein, unknown function
PF3D7_0714300	DHHC4	palmitoyltransferase DHHC4, putative
PF3D7_0714600	N/A	conserved protein, unknown function
PF3D7_0715000	PNPase	4-nitrophenylphosphatase
PF3D7_0715200	N/A	conserved Plasmodium protein, unknown function
PF3D7_0715400	PSOP20	secreted ookinete protein, putative
PF3D7_0715500	N/A	ATP synthase subunit epsilon, mitochondrial, putative
PF3D7_0715800	DMT1	drug/metabolite transporter DMT1, putative
PF3D7_0715900	CDF	cation diffusion facilitator family protein, putative
PF3D7_0716100	SDA1	protein SDA1, putative
PF3D7_0716200	N/A	PDCD2 domain-containing protein, putative
PF3D7_0716300	N/A	conserved protein, unknown function
PF3D7_0716400	N/A	transcription initiation factor IIA subunit 1, putative
PF3D7_0716600	SufS	cysteine desulfurase
PF3D7_0716700	N/A	conserved Plasmodium protein, unknown function
PF3D7_0716900	DMT2	drug/metabolite transporter DMT2
PF3D7_0717100	N/A	CRAL/TRIO domain-containing protein, putative
PF3D7_0717400	N/A	queuine tRNA-ribosyltransferase, putative
PF3D7_0717600	IMC32	inner membrane complex protein, putative
PF3D7_0717700	N/A	serine--tRNA ligase, putative
PF3D7_0717800	N/A	conserved Plasmodium protein, unknown function
PF3D7_0717900	N/A	thioredoxin-like protein
PF3D7_0718000	N/A	dynein heavy chain, putative
PF3D7_0718100	EST	exported serine/threonine protein kinase
PF3D7_0718300	CRMP2	cysteine repeat modular protein 2
PF3D7_0718400	N/A	ribosomal protein S8, mitochondrial, putative
PF3D7_0718700	N/A	conserved Plasmodium membrane protein, unknown function
PF3D7_0718900	N/A	conserved Plasmodium protein, unknown function
PF3D7_0719000	N/A	conserved protein, unknown function
PF3D7_0719100	N/A	ATP synthase F0 subunit a-like protein, putative
PF3D7_0719400	N/A	conserved Plasmodium protein, unknown function
PF3D7_0719600	N/A	60S ribosomal protein L11a, putative
PF3D7_0719800	N/A	conserved protein, unknown function
PF3D7_0719900	N/A	conserved Plasmodium membrane protein, unknown function
PF3D7_0720200	N/A	conserved protein, unknown function
PF3D7_0720700	PX1	phosphoinositide-binding protein PX1
PF3D7_0720900	N/A	tetratricopeptide repeat protein, putative
PF3D7_0721000	N/A	conserved Plasmodium membrane protein, unknown function
PF3D7_0721100	N/A	conserved protein, unknown function
PF3D7_0721200	N/A	conserved Plasmodium protein, unknown function
PF3D7_0721500	N/A	conserved Plasmodium membrane protein, unknown function
PF3D7_0721700	PSOP1	secreted ookinete protein, putative
PF3D7_0721900	N/A	V-type ATPase V0 subunit e, putative
PF3D7_0722200	RALP1	rhoptry-associated leucine zipper-like protein 1
PF3D7_0722300	N/A	ubiquitin carboxyl-terminal hydrolase, putative
PF3D7_0722800	N/A	conserved protein, unknown function
PF3D7_0722900	N/A	conserved protein, unknown function
PF3D7_0723200	N/A	conserved Plasmodium protein, unknown function
PF3D7_0723400	N/A	conserved Plasmodium protein, unknown function
PF3D7_0723500	N/A	dynactin subunit 5, putative
PF3D7_0723600	N/A	proteasome assembly chaperone 4, putative
PF3D7_0723800	N/A	conserved Plasmodium protein, unknown function
PF3D7_0724000	N/A	Rab GTPase activator and protein kinase, putative
PF3D7_0724600	N/A	protein kinase, putative
PF3D7_0724700	BDP6	bromodomain protein 6, putative
PF3D7_0724800	N/A	kelch domain-containing protein, putative
PF3D7_0724900	N/A	kinesin-20, putative
PF3D7_0725000	N/A	exonuclease I, putative
PF3D7_0725100	N/A	conserved Plasmodium membrane protein, unknown function
PF3D7_0725300	N/A	conserved protein, unknown function
PF3D7_0725400	N/A	conserved Plasmodium protein, unknown function
PF3D7_0726100	N/A	Plasmodium exported protein, unknown function
PF3D7_0726300	PMS1	DNA mismatch repair protein PMS1, putative
PF3D7_0726400	N/A	conserved Plasmodium membrane protein, unknown function
PF3D7_0726500	N/A	ubiquitin carboxyl-terminal hydrolase, putative
PF3D7_0726600	N/A	conserved Plasmodium protein, unknown function
PF3D7_0726700	N/A	conserved Plasmodium protein, unknown function
PF3D7_0726900	TIM50	mitochondrial import inner membrane translocase subunit TIM50, putative
PF3D7_0727300	DNMT	DNA (cytosine-5)-methyltransferase
PF3D7_0727500	N/A	mTERF domain-containing protein, putative
PF3D7_0727600	N/A	conserved Plasmodium protein, unknown function
PF3D7_0727700	N/A	conserved Plasmodium protein, unknown function
PF3D7_0727800	N/A	cation transporting ATPase, putative
PF3D7_0727900	N/A	conserved Plasmodium protein, unknown function
PF3D7_0728000	eIF2alpha	eukaryotic translation initiation factor 2 subunit alpha
PF3D7_0728100	N/A	anaphase-promoting complex subunit 1, putative
PF3D7_0728200	ALP3	actin-like protein, putative
PF3D7_0728300	N/A	conserved protein, unknown function
PF3D7_0728500	N/A	EF hand domain-containing protein, putative
PF3D7_0728600	N/A	RING zinc finger protein, putative
PF3D7_0728800	N/A	conserved Plasmodium protein, unknown function
PF3D7_0729100	N/A	allantoicase, putative
PF3D7_0729200	AOP	1-cys peroxiredoxin
PF3D7_0729300	NMD3	60S ribosomal export protein NMD3, putative
PF3D7_0729400	N/A	ribosome biogenesis protein BRX1, putative
PF3D7_0729500	MT-A70	N6-adenosine-methyltransferase MT-A70
PF3D7_0729800	N/A	dynein light chain, putative
PF3D7_0729900	N/A	dynein heavy chain, putative
PF3D7_0730500	N/A	conserved Plasmodium protein, unknown function
PF3D7_0730800	N/A	Plasmodium exported protein, unknown function
PF3D7_0731300	PfG174	Plasmodium exported protein (PHISTb), unknown function
PF3D7_0731500	EBA175	erythrocyte binding antigen-175
PF3D7_0731600	ACS5	acyl-CoA synthetase
PF3D7_0731700	N/A	Plasmodium exported protein (hyp9), unknown function
PF3D7_0731800	GEXP08	alpha/beta hydrolase, putative
PF3D7_0732200	RIF	rifin
PF3D7_0732300	RIF	rifin
PF3D7_0732400	RIF	rifin
PF3D7_0732500	RIF	rifin
PF3D7_0732700	RIF	rifin
PF3D7_0733000	VAR	erythrocyte membrane protein 1, PfEMP1
PF3D7_0800100	VAR	erythrocyte membrane protein 1, PfEMP1
PF3D7_0800200	VAR	erythrocyte membrane protein 1, PfEMP1
PF3D7_0800300	VAR	erythrocyte membrane protein 1, PfEMP1
PF3D7_0800800	N/A	Plasmodium exported protein (hyp7), unknown function
PF3D7_0801300	WARP	von Willebrand factor A domain-related protein
PF3D7_0801400	N/A	conserved Plasmodium protein, unknown function
PF3D7_0801700	SENP2	sentrin-specific protease 2, putative
PF3D7_0801800	N/A	mannose-6-phosphate isomerase, putative
PF3D7_0801900	LSD2	lysine-specific histone demethylase, putative
PF3D7_0802000	GDH3	glutamate dehydrogenase, putative
PF3D7_0802100	AP2-LT	AP2 domain transcription factor AP2-LT
PF3D7_0802200	1-CysPxn	1-cys peroxiredoxin
PF3D7_0802300	PWP2	periodic tryptophan protein 2, putative
PF3D7_0802400	N/A	cyclin-like protein, putative
PF3D7_0802500	N/A	inositol 5-phosphatase, putative
PF3D7_0802600	ACbeta	adenylyl cyclase beta
PF3D7_0803400	RAD54	DNA repair and recombination protein RAD54, putative
PF3D7_0803500	N/A	AAA family ATPase, putative
PF3D7_0803700	g-tub	tubulin gamma chain
PF3D7_0804300	N/A	zinc finger protein, putative
PF3D7_0804400	METAP1c	methionine aminopeptidase 1c, putative
PF3D7_0804500	N/A	conserved Plasmodium membrane protein, unknown function
PF3D7_0804600	N/A	tRNA pseudouridine synthase, putative
PF3D7_0804700	N/A	conserved Plasmodium protein, unknown function
PF3D7_0805000	N/A	alpha/beta hydrolase, putative
PF3D7_0805100	N/A	conserved protein, unknown function
PF3D7_0805300	N/A	zinc finger protein, putative
PF3D7_0805500	N/A	conserved Plasmodium protein, unknown function
PF3D7_0805700	FIKK8	serine/threonine protein kinase, FIKK family
PF3D7_0805800	N/A	conserved Plasmodium protein, unknown function
PF3D7_0805900	N/A	conserved protein, unknown function
PF3D7_0806000	N/A	AAA family ATPase, putative
PF3D7_0806100	N/A	conserved Plasmodium protein, unknown function
PF3D7_0806200	DPY19	Dpy-19-like C-mannosyltransferase
PF3D7_0806300	FLP	ferlin-like protein, putative
PF3D7_0806400	ALG13	UDP-N-acetylglucosamine transferase subunit ALG13, putative
PF3D7_0806700	N/A	conserved Plasmodium membrane protein, unknown function
PF3D7_0806800	N/A	V-type proton ATPase subunit a, putative
PF3D7_0806900	N/A	conserved protein, unknown function
PF3D7_0807100	PSH3	DNA helicase PSH3
PF3D7_0807200	N/A	conserved Plasmodium membrane protein, unknown function
PF3D7_0807300	RAB18	ras-related protein Rab-18
PF3D7_0807600	N/A	conserved Plasmodium protein, unknown function
PF3D7_0807700	DegP	serine protease DegP
PF3D7_0807800	RPN10	26S proteasome regulatory subunit RPN10, putative
PF3D7_0808000	N/A	conserved Plasmodium protein, unknown function
PF3D7_0808100	N/A	AP-3 complex subunit delta, putative
PF3D7_0808200	PMX	plasmepsin X
PF3D7_0808600	VAR	erythrocyte membrane protein 1, PfEMP1
PF3D7_0808700	VAR	erythrocyte membrane protein 1, PfEMP1
PF3D7_0808800	RIF	rifin
PF3D7_0809100	VAR	erythrocyte membrane protein 1, PfEMP1
PF3D7_0809200	pfa55-14	asparagine-rich antigen Pfa55-14
PF3D7_0809250	C4AP5	respiratory chain complex 4 associated protein 5
PF3D7_0809400	N/A	conserved protein, unknown function
PF3D7_0809500	N/A	histone acetyltransferase subunit NuA4, putative
PF3D7_0809600	N/A	peptidase family C50, putative
PF3D7_0809800	N/A	conserved Plasmodium protein, unknown function
PF3D7_0809900	JmjC1	JmjC domain-containing protein 1, putative
PF3D7_0810100	N/A	ribosomal protein L33, apicoplast, putative
PF3D7_0810700	N/A	conserved Plasmodium protein, unknown function
PF3D7_0810900	N/A	conserved Plasmodium protein, unknown function
PF3D7_0811000	CUL1	cullin-1, putative
PF3D7_0811400	N/A	conserved protein, unknown function
PF3D7_0811500	CARM1	histone-arginine methyltransferase CARM1, putative
PF3D7_0811600	N/A	conserved protein, unknown function
PF3D7_0811700	N/A	conserved Plasmodium protein, unknown function
PF3D7_0812000	N/A	conserved protein, unknown function
PF3D7_0812100	N/A	proteasome activator complex subunit 4, putative
PF3D7_0812200	N/A	trypsin-like serine protease, putative
PF3D7_0812500	N/A	RNA-binding protein, putative
PF3D7_0812700	SNRPC	U1 small nuclear ribonucleoprotein C, putative
PF3D7_0812900	N/A	conserved Plasmodium protein, unknown function
PF3D7_0813300	N/A	NPL domain-containing protein, putative
PF3D7_0813600	N/A	translation initiation factor SUI1, putative
PF3D7_0813700	ABCF1	ABC transporter F family member 1
PF3D7_0814100	N/A	conserved Plasmodium protein, unknown function
PF3D7_0814500	N/A	conserved protein, unknown function
PF3D7_0814600	PIMMS22	PIMMS22 protein, putative
PF3D7_0815100	N/A	heptatricopeptide repeat and RAP domain-containing protein, putative
PF3D7_0815300	N/A	FAD-dependent monooxygenase, putative
PF3D7_0815700	Ub	ubiquitin
PF3D7_0815800	VPS9	vacuolar protein sorting-associated protein 9, putative
PF3D7_0815900	aLipDH	dihydrolipoyl dehydrogenase, apicoplast
PF3D7_0816000	RRB1	ribosome assembly protein RRB1, putative
PF3D7_0816100	PPCDC	phosphopantothenoylcysteine decarboxylase, putative
PF3D7_0816200	VPS2	vacuolar protein sorting-associated protein 2, putative
PF3D7_0816300	N/A	HAP2-GCS1 domain-containing protein, putative
PF3D7_0816400	N/A	EF-hand calcium-binding domain-containing protein, putative
PF3D7_0816500	HSP20	small heat shock protein HSP20, putative
PF3D7_0816600	ClpB1	chaperone protein ClpB1
PF3D7_0816700	TRAPPC2L	trafficking protein particle complex subunit 2-like protein, putative
PF3D7_0816900	AK2	adenylate kinase 2
PF3D7_0817000	UBA3	NEDD8-activating enzyme E1 catalytic subunit, putative
PF3D7_0817100	N/A	tRNA modification GTPase, putative
PF3D7_0817200	N/A	conserved protein, unknown function
PF3D7_0817400	N/A	phosphatase, putative
PF3D7_0817500	HINT1	histidine triad nucleotide-binding protein 1
PF3D7_0817800	C3AP3	respiratory chain complex 3 associated protein 3
PF3D7_0818100	N/A	zinc finger protein, putative
PF3D7_0818200	14-3-3I	14-3-3 protein
PF3D7_0818500	N/A	zinc finger protein, putative
PF3D7_0818600	PBLP	BEM46-like protein, putative
PF3D7_0818700	N/A	DNA helicase, putative
PF3D7_0818800	IMP4	U3 small nucleolar ribonucleoprotein protein IMP4, putative
PF3D7_0819000	N/A	ribonuclease, putative
PF3D7_0819200	PLP5	perforin-like protein 5
PF3D7_0819300	N/A	conserved Plasmodium protein, unknown function
PF3D7_0819400	PLP4	perforin-like protein 4
PF3D7_0819500	N/A	conserved protein, unknown function
PF3D7_0819700	N/A	conserved Plasmodium protein, unknown function
PF3D7_0820000	SRCAP	Snf2-related CBP activator, putative
PF3D7_0820100	N/A	RNA-binding protein, putative
PF3D7_0820300	N/A	conserved Plasmodium protein, unknown function
PF3D7_0820400	N/A	conserved Plasmodium protein, unknown function
PF3D7_0820600	N/A	conserved protein, unknown function
PF3D7_0820800	N/A	conserved Plasmodium protein, unknown function
PF3D7_0821000	N/A	conserved Plasmodium protein, unknown function
PF3D7_0821100	PK1	protein kinase 1
PF3D7_0821300	DHX36	ATP-dependent RNA helicase DHX36, putative
PF3D7_0821500	NEP1	ribosomal RNA small subunit methyltransferase NEP1, putative
PF3D7_0822200	N/A	phosphorylated CTD interacting factor 1 WW domain-containing protein, putative
PF3D7_0822600	SEC23	protein transport protein SEC23
PF3D7_0822700	TRP1	thrombospondin-related protein 1, putative
PF3D7_0822900	PIC2	PhIL1-interacting candidate PIC2
PF3D7_0823000	VPS15	serine/threonine protein kinase VPS15, putative
PF3D7_0823100	N/A	RWD domain-containing protein, putative
PF3D7_0823300	GCN5	histone acetyltransferase GCN5
PF3D7_0823500	IMC1i	inner membrane complex protein 1i, putative
PF3D7_0823700	TOM7	mitochondrial import receptor subunit TOM7, putative
PF3D7_0824200	N/A	conserved Plasmodium protein, unknown function
PF3D7_0824500	N/A	conserved protein, unknown function
PF3D7_0824600	DRE2	Fe-S cluster assembly protein DRE2, putative
PF3D7_0824700	LMF1	lipase maturation factor, putative
PF3D7_0824800	N/A	conserved Plasmodium membrane protein, unknown function
PF3D7_0824900	N/A	conserved Plasmodium protein, unknown function
PF3D7_0825000	N/A	conserved Plasmodium protein, unknown function
PF3D7_0825200	IF3a	translation initiation factor IF-3
PF3D7_0825300	N/A	SAYSvFN domain-containing protein, putative
PF3D7_0825400	ATPTG15	ATP synthase-associated protein, putative
PF3D7_0825700	CryPH	crystalloid-specific PH domain-containing protein, putative
PF3D7_0826000	N/A	conserved Plasmodium protein, unknown function
PF3D7_0826100	HEUL	HECT-like E3 ubiquitin ligase, putative
PF3D7_0826200	N/A	alpha/beta hydrolase, putative
PF3D7_0826500	UBE4B	ubiquitin conjugation factor E4 B, putative
PF3D7_0826600	VAMP7	SNARE protein, putative
PF3D7_0827000	DBP10	ATP-dependent RNA helicase DBP10, putative
PF3D7_0827300	N/A	conserved Plasmodium protein, unknown function
PF3D7_0827400	N/A	conserved protein, unknown function
PF3D7_0827600	N/A	conserved Plasmodium protein, unknown function
PF3D7_0827700	N/A	magnesium transporter, putative
PF3D7_0827800	SET3	SET domain protein, putative
PF3D7_0828000	ROM3	rhomboid protease ROM3
PF3D7_0828100	N/A	conserved Plasmodium protein, unknown function
PF3D7_0828200	N/A	leucine--tRNA ligase, putative
PF3D7_0828400	OXA1	mitochondrial inner membrane protein OXA1, putative
PF3D7_0828600	FT1	folate transporter 1
PF3D7_0828800	GAMA	GPI-anchored micronemal antigen
PF3D7_0829000	N/A	conserved Plasmodium membrane protein, unknown function
PF3D7_0829400	N/A	prolyl 4-hydroxylase subunit alpha, putative
PF3D7_0829500	N/A	conserved Plasmodium protein, unknown function
PF3D7_0829600	ETRAMP8	early transcribed membrane protein 8
PF3D7_0830300	SIAP2	sporozoite invasion-associated protein 2
PF3D7_0831000	GEXP09	Plasmodium exported protein (PHISTb), unknown function
PF3D7_0831400	N/A	Plasmodium exported protein, unknown function
PF3D7_0831600	CLAG8	cytoadherence linked asexual protein 8
PF3D7_0832000	N/A	stevor
PF3D7_0832200	N/A	Plasmodium exported protein (PHISTa-like), unknown function
PF3D7_0832300	N/A	Plasmodium exported protein (PHISTa-like), unknown function
PF3D7_0832900	N/A	stevor
PF3D7_0833100	RIF	rifin
PF3D7_0833200	RIF	rifin
PF3D7_0833500	VAR	erythrocyte membrane protein 1, PfEMP1
PF3D7_0900100	VAR	erythrocyte membrane protein 1, PfEMP1
PF3D7_0900300	RIF	rifin
PF3D7_0901000	RIF	rifin
PF3D7_0901100	RIF	rifin
PF3D7_0901600	N/A	stevor
PF3D7_0901700	N/A	Plasmodium exported protein (hyp5), unknown function
PF3D7_0902100	FIKK9.2	serine/threonine protein kinase, FIKK family
PF3D7_0902300	FIKK9.4	serine/threonine protein kinase, FIKK family
PF3D7_0902400	FIKK9.5	serine/threonine protein kinase, FIKK family
PF3D7_0902600	FIKK9.7	serine/threonine protein kinase, FIKK family
PF3D7_0902800	SERA9	serine repeat antigen 9
PF3D7_0902900	N/A	early transcribed membrane protein, putative
PF3D7_0903200	RAB7	ras-related protein RAB7
PF3D7_0903300	N/A	conserved protein, unknown function
PF3D7_0903600	N/A	conserved protein, unknown function
PF3D7_0903700	N/A	alpha tubulin 1
PF3D7_0903800	CCp4	LCCL domain-containing protein
PF3D7_0904100	N/A	AP-4 complex subunit epsilon, putative
PF3D7_0904300	N/A	conserved protein, unknown function
PF3D7_0904400	SPC3	signal peptidase complex subunit 3, putative
PF3D7_0904600	N/A	ubiquitin specific protease, putative
PF3D7_0904700	HU	bacterial histone-like protein
PF3D7_0904800	RPA1	replication protein A1, small fragment
PF3D7_0904900	CuTP	copper-transporting ATPase
PF3D7_0905000	ATPTG4	ATP synthase-associated protein, putative
PF3D7_0905100	NUP221	nucleoporin NUP221, putative
PF3D7_0905200	N/A	mitochondrial carrier protein, putative
PF3D7_0905300	N/A	dynein heavy chain, putative
PF3D7_0905500	N/A	conserved protein, unknown function
PF3D7_0905600	WDR66	WD repeat-containing protein 66, putative
PF3D7_0905700	ATG3	autophagy-related protein 3, putative
PF3D7_0905900	SEC27	coatomer subunit beta, putative
PF3D7_0906000	RNaseII	exoribonuclease II
PF3D7_0906200	N/A	conserved Plasmodium protein, unknown function
PF3D7_0906800	N/A	conserved Plasmodium protein, unknown function
PF3D7_0907100	N/A	conserved Plasmodium protein, unknown function
PF3D7_0907200	N/A	GTPase-activating protein, putative
PF3D7_0907400	ClpY	ATP-dependent protease ATPase subunit ClpY
PF3D7_0907500	N/A	conserved protein, unknown function
PF3D7_0907800	N/A	ribosomal protein L35, apicoplast, putative
PF3D7_0907900	PDF	peptide deformylase
PF3D7_0908000	PMP1	plasma membrane protein 1, putative
PF3D7_0908100	N/A	apicoplast integral membrane protein, putative
PF3D7_0908200	N/A	conserved Plasmodium protein, unknown function
PF3D7_0908500	N/A	conserved Plasmodium protein, unknown function
PF3D7_0908600	N/A	ribosomal RNA methyltransferase, putative
PF3D7_0908700	N/A	tRNA pseudouridine synthase, putative
PF3D7_0908800	N/A	mitochondrial carrier protein, putative
PF3D7_0908900	N/A	conserved Plasmodium protein, unknown function
PF3D7_0909000	N/A	conserved Plasmodium protein, unknown function
PF3D7_0909200	POFUT2	GDP-fucose protein O-fucosyltransferase 2
PF3D7_0909700	N/A	FHA domain protein, putative
PF3D7_0909900	N/A	helicase SKI2W, putative
PF3D7_0910000	SET4	histone-lysine N-methyltransferase SET4
PF3D7_0910100	N/A	exportin-7, putative
PF3D7_0910200	N/A	conserved Plasmodium protein, unknown function
PF3D7_0910300	N/A	conserved protein, unknown function
PF3D7_0910400	N/A	selenide water dikinase, putative
PF3D7_0910500	N/A	DNA repair protein REV1, putative
PF3D7_0910600	YKT6.1	SNARE protein
PF3D7_0910800	NBP35	cytosolic Fe-S cluster assembly factor NBP35, putative
PF3D7_0911100	N/A	START domain-containing protein, putative
PF3D7_0911200	N/A	conserved Plasmodium protein, unknown function
PF3D7_0911300	CRMP1	cysteine repeat modular protein 1
PF3D7_0911400	N/A	conserved Plasmodium protein, unknown function
PF3D7_0911700	N/A	GTP-binding protein, putative
PF3D7_0911900	ICP	falstatin
PF3D7_0912000	N/A	conserved Plasmodium protein, unknown function
PF3D7_0912100	N/A	zinc finger protein, putative
PF3D7_0912200	N/A	conserved protein, unknown function
PF3D7_0912400	N/A	alkaline phosphatase, putative
PF3D7_0912700	N/A	conserved Plasmodium protein, unknown function
PF3D7_0912800	GCD10	tRNA (adenine(58)-N(1))-methyltransferase non-catalytic subunit TRM6, putative
PF3D7_0913100	N/A	heptatricopeptide repeat-containing protein, putative
PF3D7_0913150	N/A	conserved protein, unknown function
PF3D7_0913400	N/A	elongation factor, putative
PF3D7_0913500	AMR4	protein AMR4
PF3D7_0913600	N/A	conserved Plasmodium protein, unknown function
PF3D7_0913800	N/A	conserved Plasmodium protein, unknown function
PF3D7_0913900	RRSapi	arginine--tRNA ligase, putative
PF3D7_0914000	N/A	pseudouridylate synthase, putative
PF3D7_0914100	N/A	conserved Plasmodium protein, unknown function
PF3D7_0914300	N/A	met-10+ like protein, putative
PF3D7_0914500	N/A	conserved Plasmodium protein, unknown function
PF3D7_0915000	NDH2	type II NADH:ubiquinone oxidoreductase
PF3D7_0915300	N/A	heptatricopeptide repeat-containing protein, putative
PF3D7_0915500	N/A	conserved Plasmodium protein, unknown function
PF3D7_0916000	MFS2	major facilitator superfamily domain-containing protein, putative
PF3D7_0916100	TRX3	thioredoxin 3
PF3D7_0916300	N/A	conserved Plasmodium protein, unknown function
PF3D7_0916400	N/A	conserved Plasmodium protein, unknown function
PF3D7_0916500	UFD1	ubiquitin fusion degradation protein 1
PF3D7_0916900	N/A	zinc finger protein, putative
PF3D7_0917000	MOP	merozoite organizing protein
PF3D7_0917100	OGG1	N-glycosylase/DNA lyase, putative
PF3D7_0917400	N/A	conserved Plasmodium protein, unknown function
PF3D7_0918000	GAP50	glideosome-associated protein 50
PF3D7_0918200	N/A	50S ribosomal protein L3, apicoplast, putative
PF3D7_0918400	N/A	conserved Plasmodium protein, unknown function
PF3D7_0918600	RECQ1	ATP-dependent DNA helicase Q1
PF3D7_0918900	gammaGCS	gamma-glutamylcysteine synthetase
PF3D7_0919400	PDI-Trans	protein disulfide-isomerase PDI-Trans
PF3D7_0919500	MFS3	major facilitator superfamily domain-containing protein, putative
PF3D7_0919600	WBP1	dolichyl-diphosphooligosaccharide--protein glycosyltransferase subunit WBP1, putative
PF3D7_0919900	RCC-PIP	regulator of chromosome condensation-PP1-interacting protein
PF3D7_0920000	ELO3	elongation of fatty acids protein, putative
PF3D7_0920100	N/A	chaperone, putative
PF3D7_0920200	N/A	CS domain protein, putative
PF3D7_0920300	N/A	conserved Plasmodium protein, unknown function
PF3D7_0920400	N/A	conserved Plasmodium protein, unknown function
PF3D7_0920500	N/A	ADP-ribosylation factor, putative
PF3D7_0920600	N/A	conserved Plasmodium protein, unknown function
PF3D7_0920700	N/A	CRAL/TRIO domain-containing protein, putative
PF3D7_0921000	N/A	ubiquitin-conjugating enzyme E2, putative
PF3D7_0921200	N/A	conserved Plasmodium membrane protein, unknown function
PF3D7_0921300	N/A	RAP protein, putative
PF3D7_0921400	NifU	NifU-like scaffold protein
PF3D7_0921600	N/A	tetratricopeptide repeat protein, putative
PF3D7_0921700	N/A	conserved protein, unknown function
PF3D7_0921900	N/A	conserved Plasmodium protein, unknown function
PF3D7_0922000	N/A	dynein intermediate chain, putative
PF3D7_0922200	SAMS	S-adenosylmethionine synthetase
PF3D7_0922300	N/A	conserved protein, unknown function
PF3D7_0922600	N/A	glutamine synthetase, putative
PF3D7_0922700	PRP18	pre-mRNA-splicing factor 18, putative
PF3D7_0922800	N/A	conserved Plasmodium protein, unknown function
PF3D7_0922900	FabG	3-oxoacyl-[acyl-carrier-protein] reductase
PF3D7_0923100	N/A	OTU domain-containing protein, putative
PF3D7_0923200	NOS	nitric oxide synthase, putative
PF3D7_0923600	LipL2	lipoate-protein ligase 2
PF3D7_0923800	TRXR	thioredoxin reductase
PF3D7_0924100	N/A	conserved Plasmodium protein, unknown function
PF3D7_0924300	TPK	thiamine pyrophosphokinase
PF3D7_0924500	N/A	conserved Plasmodium membrane protein, unknown function
PF3D7_0925100	N/A	conserved Plasmodium protein, unknown function
PF3D7_0925400	N/A	protein phosphatase-beta
PF3D7_0925500	TLP2	thioredoxin-like protein 2
PF3D7_0925600	N/A	zinc binding protein (Yippee), putative
PF3D7_0925800	UPF2	regulator of nonsense transcripts 2, putative
PF3D7_0926100	N/A	protein kinase, putative
PF3D7_0926200	N/A	conserved Plasmodium protein, unknown function
PF3D7_0926300	N/A	protein kinase, putative
PF3D7_0926400	N/A	monocarboxylate transporter, putative
PF3D7_0926700	NADSYN	glutamine-dependent NAD(+) synthetase, putative
PF3D7_0926900	N/A	replication termination factor, putative
PF3D7_0927200	N/A	zinc finger protein, putative
PF3D7_0927400	N/A	conserved Plasmodium protein, unknown function
PF3D7_0927700	PPP4	serine/threonine protein phosphatase 4, putative
PF3D7_0927800	COX5B	cytochrome c oxidase subunit 5B, putative
PF3D7_0928000	COX6B	cytochrome c oxidase subunit 6B, putative
PF3D7_0928200	N/A	conserved Plasmodium protein, unknown function
PF3D7_0928300	N/A	conserved Plasmodium protein, unknown function
PF3D7_0928900	GK	guanylate kinase
PF3D7_0929400	RhopH2	high molecular weight rhoptry protein 2
PF3D7_0929600	N/A	G2 protein, putative
PF3D7_0929700	N/A	conserved Plasmodium protein, unknown function
PF3D7_0929800	N/A	conserved Plasmodium protein, unknown function
PF3D7_0929900	N/A	conserved Plasmodium protein, unknown function
PF3D7_0930300	MSP1	merozoite surface protein 1
PF3D7_0930400	N/A	zinc finger protein, putative
PF3D7_0930500	DGK1	diacylglycerol kinase, putative
PF3D7_0930600	CYP72	peptidyl-prolyl cis-trans isomerase
PF3D7_0930700	N/A	conserved Plasmodium protein, unknown function
PF3D7_0930800	N/A	conserved Plasmodium membrane protein, unknown function
PF3D7_0931100	N/A	nucleolar protein Nop52, putative
PF3D7_0931300	N/A	conserved Plasmodium protein, unknown function
PF3D7_0931700	N/A	PIH1 domain-containing protein, putative
PF3D7_0931800	N/A	proteasome subunit beta type-6, putative
PF3D7_0932100	N/A	protein MAM3, putative
PF3D7_0932300	M18AAP	M18 aspartyl aminopeptidase
PF3D7_0932400	RF1	peptide chain release factor 1
PF3D7_0932500	DHHC6	palmitoyltransferase DHHC6, putative
PF3D7_0932600	RPS6	apicoplast ribosomal protein S6, putative
PF3D7_0932700	N/A	conserved Plasmodium protein, unknown function
PF3D7_0932800	CSE1	importin alpha re-exporter, putative
PF3D7_0933000	N/A	CSTF domain-containing protein, putative
PF3D7_0933100	N/A	conserved Plasmodium protein, unknown function
PF3D7_0933300	N/A	conserved Plasmodium protein, unknown function
PF3D7_0933400	N/A	conserved Plasmodium protein, unknown function
PF3D7_0933500	N/A	gamma-tubulin complex component, putative
PF3D7_0933600	QCR1	mitochondrial-processing peptidase subunit beta, putative
PF3D7_0933800	N/A	tubulin delta chain, putative
PF3D7_0934000	N/A	histidine--tRNA ligase, putative
PF3D7_0934100	XPD	TFIIH basal transcription factor complex helicase XPD subunit
PF3D7_0934500	N/A	V-type proton ATPase subunit E, putative
PF3D7_0934600	N/A	conserved Plasmodium protein, unknown function
PF3D7_0935100	KSH1	protein kish, putative
PF3D7_0935400	GDV1	gametocyte development protein 1
PF3D7_0935500	GEXP22	Plasmodium exported protein, unknown function
PF3D7_0935800	CLAG9	cytoadherence linked asexual protein 9
PF3D7_0936100	ETRAMP9	early transcribed membrane protein
PF3D7_0936400	REX4	ring-exported protein 4
PF3D7_0936700	N/A	lysophospholipase, putative
PF3D7_0937000	N/A	Plasmodium exported protein (PHISTb), unknown function
PF3D7_0937200	N/A	lysophospholipase, putative
PF3D7_0937300	RIF	rifin
PF3D7_0937400	RIF	rifin
PF3D7_0937800	VAR	erythrocyte membrane protein 1, PfEMP1
PF3D7_1000100	VAR	erythrocyte membrane protein 1, PfEMP1
PF3D7_1000300	RIF	rifin
PF3D7_1000400	RIF	rifin
PF3D7_1000600	RIF	rifin
PF3D7_1001400	XL1	exported lipase 1
PF3D7_1001800	N/A	Plasmodium exported protein (PHISTc), unknown function
PF3D7_1001900	PfJ23	Plasmodium exported protein (hyp16), unknown function
PF3D7_1002000	N/A	Plasmodium exported protein (hyp2), unknown function
PF3D7_1002300	N/A	conserved Plasmodium protein, unknown function
PF3D7_1002500	N/A	conserved protein, unknown function
PF3D7_1002700	N/A	conserved Plasmodium protein, unknown function
PF3D7_1003000	N/A	guanylate cyclase organizer UGO, putative
PF3D7_1003300	ARD1	N-terminal acetyltransferase A complex catalytic subunit ARD1, putative
PF3D7_1003400	N/A	conserved Plasmodium protein, unknown function
PF3D7_1003600	IMC1c	inner membrane complex protein 1c, putative
PF3D7_1003700	N/A	MKT1 domain-containing protein, putative
PF3D7_1003800	EFTUD2	U5 small nuclear ribonucleoprotein component, putative
PF3D7_1004000	N/A	60S ribosomal protein L13, putative
PF3D7_1004200	N/A	WD repeat-containing protein, putative
PF3D7_1004300	N/A	E3 ubiquitin-protein ligase, putative
PF3D7_1004900	N/A	conserved protein, unknown function
PF3D7_1005000	MRSapi	methionine--tRNA ligase, putative
PF3D7_1005300	N/A	conserved Plasmodium protein, unknown function
PF3D7_1005500	UPF1	regulator of nonsense transcripts 1, putative
PF3D7_1005600	N/A	DnaJ protein, putative
PF3D7_1005700	N/A	peptidase, putative
PF3D7_1005900	N/A	conserved protein, unknown function
PF3D7_1006000	IMP4	IMP1-like protein, putative
PF3D7_1006400	N/A	heptatricopeptide repeat-containing protein, putative
PF3D7_1006600	PhLP3	phosducin-like protein 3, putative
PF3D7_1006700	N/A	conserved Plasmodium protein, unknown function
PF3D7_1007300	N/A	RING zinc finger protein, putative
PF3D7_1007500	N/A	conserved Plasmodium protein, unknown function
PF3D7_1007600	N/A	conserved protein, unknown function
PF3D7_1007800	N/A	conserved Plasmodium protein, unknown function
PF3D7_1008000	HDA2	histone deacetylase 2
PF3D7_1008100	PHD1	PHD finger protein PHD1
PF3D7_1008500	N/A	protein GPR89, putative
PF3D7_1008600	N/A	zinc finger (CCCH type) protein, putative
PF3D7_1008700	N/A	tubulin beta chain
PF3D7_1008900	AK1	adenylate kinase
PF3D7_1009100	N/A	conserved Plasmodium membrane protein, unknown function
PF3D7_1009200	N/A	ribonuclease, putative
PF3D7_1009400	ZNF2	zinc finger protein, putative
PF3D7_1009500	N/A	metalloprotease, putative
PF3D7_1009600	PPM10	protein phosphatase PPM10, putative
PF3D7_1009800	N/A	conserved Plasmodium membrane protein, unknown function
PF3D7_1009900	N/A	heptatricopeptide repeat-containing protein, putative
PF3D7_1010000	N/A	ribosomal protein L43, mitochondrial, putative
PF3D7_1010200	N/A	DNA2/NAM7 helicase, putative
PF3D7_1010700	N/A	dolichyl-phosphate-mannose--protein mannosyltransferase, putative
PF3D7_1010800	N/A	50S ribosomal protein L22, mitochondrial, putative
PF3D7_1011000	ISP1	inner membrane complex sub-compartment protein 1
PF3D7_1011300	ARV1	protein ARV1, putative
PF3D7_1011400	N/A	proteasome subunit beta type-5
PF3D7_1011500	N/A	conserved protein, unknown function
PF3D7_1012300	QCR7	cytochrome b-c1 complex subunit 7, putative
PF3D7_1012400	HGPRT	hypoxanthine-guanine phosphoribosyltransferase
PF3D7_1012500	N/A	phosphoglucomutase, putative
PF3D7_1012600	GMPS	GMP synthase [glutamine-hydrolyzing]
PF3D7_1012700	NIF4	NLI interacting factor-like phosphatase, putative
PF3D7_1012900	ATG18	autophagy-related protein 18
PF3D7_1013000	N/A	zinc finger protein, putative
PF3D7_1013100	UTP13	U3 small nucleolar RNA-associated protein 13, putative
PF3D7_1013200	N/A	conserved Plasmodium protein, unknown function
PF3D7_1013300	N/A	conserved Plasmodium protein, unknown function
PF3D7_1013400	N/A	conserved Plasmodium protein, unknown function
PF3D7_1013500	PI-PLC	phosphoinositide-specific phospholipase C
PF3D7_1013600	N/A	conserved Plasmodium protein, unknown function
PF3D7_1013700	N/A	thioredoxin-like protein, putative
PF3D7_1013900	N/A	translation initiation factor eIF-2B subunit delta, putative
PF3D7_1014000	FS	GDP-L-fucose synthase
PF3D7_1014100	MSA180	merozoite surface protein MSA180
PF3D7_1014200	HAP2	male gamete fusion factor HAP2, putative
PF3D7_1014300	N/A	SPRY domain-containing protein, putative
PF3D7_1014500	N/A	conserved Plasmodium protein, unknown function
PF3D7_1014600	ADA2	transcriptional coactivator ADA2
PF3D7_1014900	KIC8	protein KIC8
PF3D7_1015000	N/A	FAD synthetase, putative
PF3D7_1015100	N/A	CWC16 domain-containing protein, putative
PF3D7_1015200	CysRS	cysteine--tRNA ligase
PF3D7_1015300	METAP1b	methionine aminopeptidase 1b, putative
PF3D7_1015800	N/A	ribonucleoside-diphosphate reductase small chain, putative
PF3D7_1016100	N/A	conserved Plasmodium protein, unknown function
PF3D7_1016500	N/A	Plasmodium exported protein (PHISTc), unknown function
PF3D7_1016900	ETRAMP10.3	early transcribed membrane protein 10.3
PF3D7_1017000	N/A	DNA polymerase delta catalytic subunit
PF3D7_1017100	RON12	rhoptry neck protein 12
PF3D7_1017200	N/A	enoyl-CoA hydratase-related protein, putative
PF3D7_1017500	ELC	myosin essential light chain ELC
PF3D7_1017700	N/A	conserved Plasmodium protein, unknown function
PF3D7_1017800	N/A	conserved Plasmodium protein, unknown function
PF3D7_1017900	RPN5	26S proteasome regulatory subunit p55, putative
PF3D7_1018000	N/A	tRNA pseudouridine synthase, putative
PF3D7_1018200	PPP8	serine/threonine protein phosphatase 8, putative
PF3D7_1018300	N/A	peptidase, putative
PF3D7_1018500	RDS3	pre-mRNA-splicing factor RDS3, putative
PF3D7_1018600	N/A	tRNA wybutosine-synthesizing protein, putative
PF3D7_1018800	N/A	conserved protein, unknown function
PF3D7_1018900	N/A	conserved Plasmodium protein, unknown function
PF3D7_1019000	N/A	eukaryotic translation initiation factor subunit eIF2A, putative
PF3D7_1019100	N/A	conserved Plasmodium protein, unknown function
PF3D7_1019300	N/A	zinc finger protein, putative
PF3D7_1019500	N/A	TMEM94 domain-containing protein, putative
PF3D7_1019600	N/A	conserved Plasmodium protein, unknown function
PF3D7_1019800	N/A	tRNA methyltransferase, putative
PF3D7_1019900	ATG8	autophagy-related protein 8
PF3D7_1020200	N/A	conserved Plasmodium protein, unknown function
PF3D7_1020300	N/A	cytoplasmic dynein intermediate chain, putative
PF3D7_1020400	RCM1	rRNA (cytosine-C(5))-methyltransferase, putative
PF3D7_1020600	N/A	conserved Plasmodium membrane protein, unknown function
PF3D7_1020700	N/A	N-acetyltransferase, GNAT family, putative
PF3D7_1020800	DLAT	dihydrolipoamide acyltransferase component E2
PF3D7_1021000	N/A	conserved protein, unknown function
PF3D7_1021100	N/A	conserved Plasmodium protein, unknown function
PF3D7_1021200	N/A	conserved Plasmodium protein, unknown function
PF3D7_1021300	N/A	apicoplast integral membrane protein, putative
PF3D7_1021400	N/A	endomembrane protein 70, putative
PF3D7_1021700	N/A	VPS13 domain-containing protein, putative
PF3D7_1021800	SEA1	schizont egress antigen-1
PF3D7_1022000	N/A	RNA-binding protein UIS12, putative
PF3D7_1022200	N/A	conserved Plasmodium membrane protein, unknown function
PF3D7_1022300	ZIPCO	ZIP domain-containing protein, putative
PF3D7_1022500	CS	citrate synthase, mitochondrial, putative
PF3D7_1022700	PLSCR	phospholipid scramblase
PF3D7_1022900	ApiCOX13	cytochrome c oxidase subunit ApiCOX13, putative
PF3D7_1023000	N/A	conserved Plasmodium protein, unknown function
PF3D7_1023100	N/A	dynein heavy chain, putative
PF3D7_1023200	OMPDC	orotidine 5'-phosphate decarboxylase
PF3D7_1023600	N/A	conserved protein, unknown function
PF3D7_1023700	N/A	conserved Plasmodium protein, unknown function
PF3D7_1023800	N/A	conserved Plasmodium protein, unknown function
PF3D7_1023900	CHD1	chromodomain-helicase-DNA-binding protein 1 homolog, putative
PF3D7_1024000	N/A	conserved Plasmodium protein, unknown function
PF3D7_1024100	N/A	conserved Plasmodium protein, unknown function
PF3D7_1024500	N/A	conserved Plasmodium protein, unknown function
PF3D7_1024600	N/A	RAP protein, putative
PF3D7_1024700	N/A	conserved protein, unknown function
PF3D7_1024900	N/A	conserved Plasmodium protein, unknown function
PF3D7_1025000	EPS15	Eps15-like protein
PF3D7_1025100	GFPT	glutamine--fructose-6-phosphate aminotransferase [isomerizing], putative
PF3D7_1025200	ATP12	ATP synthase mitochondrial F1 complex assembly factor 2, putative
PF3D7_1025300	N/A	conserved protein, unknown function
PF3D7_1025400	N/A	conserved Plasmodium membrane protein, unknown function
PF3D7_1025500	N/A	conserved Plasmodium protein, unknown function
PF3D7_1025600	COX17	cytochrome c oxidase copper chaperone, putative
PF3D7_1025700	N/A	conserved protein, unknown function
PF3D7_1025900	N/A	conserved protein, unknown function
PF3D7_1026200	N/A	conserved protein, unknown function
PF3D7_1026300	N/A	conserved Plasmodium protein, unknown function
PF3D7_1026400	CDC20	cell division cycle protein 20 homolog, putative
PF3D7_1026600	N/A	conserved Plasmodium protein, unknown function
PF3D7_1026800	RPS2	40S ribosomal protein S2
PF3D7_1027500	N/A	conserved Plasmodium protein, unknown function
PF3D7_1027600	SPO11-2	meiotic recombination protein SPO11-2, putative
PF3D7_1027800	RPL3	60S ribosomal protein L3
PF3D7_1027900	DHHC10	palmitoyltransferase DHHC10, putative
PF3D7_1028100	PPO	protoporphyrinogen oxidase
PF3D7_1028600	N/A	conserved Plasmodium protein, unknown function
PF3D7_1028900	IMC1m	inner membrane complex protein 1m, putative
PF3D7_1029100	N/A	conserved Plasmodium protein, unknown function
PF3D7_1029200	N/A	WD repeat-containing protein, putative
PF3D7_1029300	N/A	conserved protein, unknown function
PF3D7_1029400	CDC50C	LEM3/CDC50 family protein, putative
PF3D7_1029600	ADA	adenosine deaminase
PF3D7_1029800	HPR2	heptatricopeptide repeat and RAP domain-containing protein, putative
PF3D7_1029900	N/A	ORC3 domain-containing protein, putative
PF3D7_1030100	PRP22	pre-mRNA-splicing factor ATP-dependent RNA helicase PRP22, putative
PF3D7_1030200	CLAMP	claudin-like apicomplexan microneme protein, putative
PF3D7_1030300	N/A	conserved Plasmodium protein, unknown function
PF3D7_1030400	N/A	conserved protein, unknown function
PF3D7_1030500	RPN9	26S proteasome regulatory subunit RPN9, putative
PF3D7_1030900	P28	ookinete surface protein P28
PF3D7_1031200	MORN1	MORN repeat-containing protein 1
PF3D7_1031300	N/A	SAE2 domain-containing protein, putative
PF3D7_1031400	OTU	OTU-like cysteine protease
PF3D7_1031700	I3	protein phosphatase inhibitor 3
PF3D7_1031900	N/A	conserved Plasmodium protein, unknown function
PF3D7_1032000	RimM	ribosome maturation factor RimM, putative
PF3D7_1032100	DCP1	mRNA-decapping enzyme subunit 1, putative
PF3D7_1032400	PIGA	phosphatidylinositol N-acetylglucosaminyltransferase subunit A, putative
PF3D7_1032600	N/A	conserved protein, unknown function
PF3D7_1032900	N/A	RNA polymerase II-associated protein 1, putative
PF3D7_1033000	HPR1	heptatricopeptide repeat-containing protein HPR1, putative
PF3D7_1033100	AdoMetDC/ODC	S-adenosylmethionine decarboxylase/ornithine decarboxylase
PF3D7_1033200	ETRAMP10.2	early transcribed membrane protein 10.2
PF3D7_1033300	N/A	conserved protein, unknown function
PF3D7_1033500	WDR70	WD repeat-containing protein 70, putative
PF3D7_1033600	CEF1	pre-mRNA-splicing factor CEF1, putative
PF3D7_1034100	N/A	conserved protein, unknown function
PF3D7_1034400	SDHA	flavoprotein subunit of succinate dehydrogenase
PF3D7_1034500	N/A	armadillo repeat protein, putative
PF3D7_1034600	IF3b	translation initiation factor IF-3, putative
PF3D7_1034800	N/A	conserved protein, unknown function
PF3D7_1034900	MRScyt	methionine--tRNA ligase
PF3D7_1035100	N/A	probable protein, unknown function
PF3D7_1035200	N/A	S-antigen
PF3D7_1035300	GLURP	glutamate-rich protein GLURP
PF3D7_1035800	M712	probable protein, unknown function
PF3D7_1035900	MAAP	merozoites-associated armadillo repeats protein
PF3D7_1036300	DBLMSP2	duffy binding-like merozoite surface protein 2
PF3D7_1036600	N/A	conserved protein, unknown function
PF3D7_1037000	REV3	DNA polymerase zeta catalytic subunit, putative
PF3D7_1037100	PyKII	pyruvate kinase 2
PF3D7_1037200	N/A	conserved Plasmodium protein, unknown function
PF3D7_1037500	DYN2	dynamin-like protein
PF3D7_1037800	N/A	dynein intermediate chain, putative
PF3D7_1038200	N/A	conserved Plasmodium protein, unknown function
PF3D7_1038300	N/A	conserved Plasmodium protein, unknown function
PF3D7_1038500	N/A	Plasmodium exported protein, unknown function
PF3D7_1038800	N/A	RESA-like protein with PHIST and DnaJ domains
PF3D7_1039000	FIKK10.2	serine/threonine protein kinase, FIKK family
PF3D7_1039700	MC-2TM	Pfmc-2TM Maurer's cleft two transmembrane protein
PF3D7_1039900	EPF4	exported protein family 4
PF3D7_1040000	RIF	rifin
PF3D7_1040400	RIF	rifin
PF3D7_1040600	RIF	rifin
PF3D7_1041100	RIF	rifin
PF3D7_1041200	RIF	rifin
PF3D7_1041300	VAR	erythrocyte membrane protein 1, PfEMP1
PF3D7_1100100	VAR	erythrocyte membrane protein 1, PfEMP1
PF3D7_1100200	VAR	erythrocyte membrane protein 1, PfEMP1
PF3D7_1100800	MC-2TM	Pfmc-2TM Maurer's cleft two transmembrane protein
PF3D7_1101200	RIF	rifin
PF3D7_1101300	RIF	rifin
PF3D7_1101500	EPF4	exported protein family 4
PF3D7_1101700	MC-2TM	Pfmc-2TM Maurer's cleft two transmembrane protein
PF3D7_1102300	N/A	Plasmodium exported protein, unknown function
PF3D7_1102400	PPCS	phosphopantothenate--cysteine ligase, putative
PF3D7_1102900	N/A	Plasmodium exported protein (hyp11), unknown function
PF3D7_1103100	RPP1	60S acidic ribosomal protein P1, putative
PF3D7_1103500	N/A	CPW-WPC family protein
PF3D7_1103800	NOT1-G	CCR4-NOT transcription complex subunit NOT1-G, putative
PF3D7_1104000	N/A	phenylalanine--tRNA ligase beta subunit
PF3D7_1104200	SNF2L	chromatin remodeling protein
PF3D7_1104300	N/A	conserved Plasmodium protein, unknown function
PF3D7_1104400	Trx-mero	thioredoxin-like mero protein
PF3D7_1104900	N/A	calcium/calmodulin-dependent protein kinase, putative
PF3D7_1105200	WDR8	WD repeat-containing protein WRAP73, putative
PF3D7_1105600	PTEX88	translocon component PTEX88
PF3D7_1106100	N/A	ribosomal protein S15, apicoplast, putative
PF3D7_1106200	N/A	conserved Plasmodium protein, unknown function
PF3D7_1106300	XRN1	5'-3' exoribonuclease 1, putative
PF3D7_1106400	N/A	conserved Plasmodium protein, unknown function
PF3D7_1106500	N/A	conserved Plasmodium protein, unknown function
PF3D7_1106600	N/A	DEAD/DEAH box helicase, putative
PF3D7_1106700	DNA2	DNA replication ATP-dependent helicase/nuclease DNA2, putative
PF3D7_1106800	pTKL	pseudo-tyrosine kinase-like protein
PF3D7_1107000	LSM4	U6 snRNA-associated Sm-like protein LSm4, putative
PF3D7_1107200	N/A	conserved protein, unknown function
PF3D7_1107300	PAIP1	polyadenylate-binding protein-interacting protein 1, putative
PF3D7_1107600	N/A	conserved Plasmodium protein, unknown function
PF3D7_1107800	ApiAP2	AP2 domain transcription factor, putative
PF3D7_1107900	MSCS	mechanosensitive ion channel protein, putative
PF3D7_1108100	N/A	conserved Plasmodium protein, unknown function
PF3D7_1108300	PCD	pterin-4a-carbinolamine dehydratase
PF3D7_1108600	ERC	endoplasmic reticulum-resident calcium binding protein
PF3D7_1108700	Pfj2	heat shock protein J2
PF3D7_1108900	N/A	tetratricopeptide repeat protein, putative
PF3D7_1109100	N/A	conserved Plasmodium protein, unknown function
PF3D7_1110200	PRPF6	pre-mRNA-processing factor 6, putative
PF3D7_1110500	VPS35	vacuolar protein sorting-associated protein 35, putative
PF3D7_1110800	N/A	conserved Plasmodium protein, unknown function
PF3D7_1111000	NSUN2	RNA cytosine C(5)-methyltransferase NSUN2
PF3D7_1111600	N/A	endonuclease/exonuclease/phosphatase family protein, putative
PF3D7_1111700	N/A	conserved Plasmodium protein, unknown function
PF3D7_1111900	N/A	Josephin domain-containing protein, putative
PF3D7_1112000	N/A	conserved protein, unknown function
PF3D7_1112100	N/A	conserved Plasmodium protein, unknown function
PF3D7_1113000	N/A	conserved Plasmodium protein, unknown function
PF3D7_1113100	PRL	protein tyrosine phosphatase
PF3D7_1113600	N/A	conserved Plasmodium protein, unknown function
PF3D7_1113900	MAPK2	mitogen-activated protein kinase 2
PF3D7_1114400	N/A	RAP protein, putative
PF3D7_1114500	N/A	conserved Plasmodium protein, unknown function
PF3D7_1114700	CLK3	cyclin-dependent-like kinase CLK3
PF3D7_1114800	G3PDH	glycerol-3-phosphate dehydrogenase, putative
PF3D7_1114900	N/A	filamin domain-containing protein, putative
PF3D7_1115100	N/A	conserved protein, unknown function
PF3D7_1115600	CYP19B	peptidyl-prolyl cis-trans isomerase
PF3D7_1115900	DHHC9	palmitoyltransferase DHHC9
PF3D7_1116100	N/A	serine esterase, putative
PF3D7_1116200	PDX2	pyridoxine biosynthesis protein PDX2
PF3D7_1116300	CYP19C	peptidyl-prolyl cis-trans isomerase
PF3D7_1116400	SEC12	guanine nucleotide-exchange factor SEC12
PF3D7_1116700	DPAP1	dipeptidyl aminopeptidase 1
PF3D7_1117000	N/A	MFS domain-containing protein P115, putative
PF3D7_1117100	UCH54	ubiquitin carboxyl-terminal hydrolase UCH54
PF3D7_1117200	N/A	conserved Plasmodium protein, unknown function
PF3D7_1117300	N/A	conserved protein, unknown function
PF3D7_1117500	TyrRSapi	tyrosine--tRNA ligase
PF3D7_1117800	MLH	DNA mismatch repair protein MLH
PF3D7_1117900	N/A	conserved Plasmodium protein, unknown function
PF3D7_1118000	N/A	conserved Plasmodium protein, unknown function
PF3D7_1118200	N/A	heat shock protein 90, putative
PF3D7_1118300	N/A	insulinase, putative
PF3D7_1118400	HAD4	haloacid dehalogenase-like hydrolase, putative
PF3D7_1118500	NOP56	nucleolar protein 56, putative
PF3D7_1118700	MLC-B	myosin light chain B
PF3D7_1118800	ARC40	actin-related protein 2/3 complex subunit 1, putative
PF3D7_1119200	N/A	conserved protein, unknown function
PF3D7_1119800	ASF1	alternative splicing factor ASF-1, putative
PF3D7_1119900	SEC16	protein transport protein SEC16, putative
PF3D7_1120500	N/A	tRNA nucleotidyltransferase, putative
PF3D7_1120700	N/A	conserved Plasmodium protein, unknown function
PF3D7_1120800	N/A	conserved Plasmodium protein, unknown function
PF3D7_1121000	DHHC3	palmitoyltransferase DHHC3
PF3D7_1121100	N/A	conserved protein, unknown function
PF3D7_1121200	N/A	conserved protein, unknown function
PF3D7_1121300	TKL2	tyrosine kinase-like protein
PF3D7_1121400	N/A	WD repeat-containing protein, putative
PF3D7_1121500	N/A	conserved protein, unknown function
PF3D7_1122000	N/A	conserved protein, unknown function
PF3D7_1122100	GPI16	GPI transamidase component GPI16, putative
PF3D7_1122200	JmjC3	JmjC domain-containing protein 3
PF3D7_1122300	N/A	conserved Plasmodium protein, unknown function
PF3D7_1122400	N/A	conserved Plasmodium protein, unknown function
PF3D7_1122500	KIC10	protein KIC10
PF3D7_1122600	N/A	conserved Plasmodium protein, unknown function
PF3D7_1122800	CDPK6	calcium-dependent protein kinase 6
PF3D7_1122900	N/A	dynein heavy chain, putative
PF3D7_1123000	N/A	conserved Plasmodium protein, unknown function
PF3D7_1123100	CDPK7	calcium-dependent protein kinase 7
PF3D7_1123200	LRR11	leucine-rich repeat protein
PF3D7_1123300	N/A	RING zinc finger protein, putative
PF3D7_1123500	GP2	golgi protein 2
PF3D7_1123600	N/A	RAP protein, putative
PF3D7_1123700	N/A	ribosomal protein L37, mitochondrial, putative
PF3D7_1123800	SMC5	structural maintenance of chromosomes protein 5, putative
PF3D7_1124000	ERO1	endoplasmic reticulum oxidoreductin, putative
PF3D7_1124200	N/A	thioredoxin-like protein, putative
PF3D7_1124500	pdhA	pyruvate dehydrogenase E1 component subunit alpha
PF3D7_1124600	EK	ethanolamine kinase
PF3D7_1124700	MGE1	GrpE protein homolog, mitochondrial, putative
PF3D7_1124800	RRS1	ribosome biogenesis regulatory protein, putative
PF3D7_1125000	N/A	conserved protein, unknown function
PF3D7_1125100	ICAP2	ATP synthase F0 subunit b-like protein, putative
PF3D7_1125300	mtRNAP	DNA-directed RNA polymerase
PF3D7_1125400	TIM44	mitochondrial import inner membrane translocase subunit TIM44, putative
PF3D7_1125800	N/A	kelch domain-containing protein, putative
PF3D7_1126000	ThrRS	threonine--tRNA ligase
PF3D7_1126100	ATG7	autophagy-related protein 7, putative
PF3D7_1126300	N/A	DnaJ protein, putative
PF3D7_1126500	N/A	WD repeat-containing protein, putative
PF3D7_1126600	N/A	steryl ester hydrolase, putative
PF3D7_1126700	ATG23	conserved Plasmodium protein, unknown function
PF3D7_1127100	dUTPase	deoxyuridine 5'-triphosphate nucleotidohydrolase
PF3D7_1127200	N/A	conserved Plasmodium protein, unknown function
PF3D7_1127300	N/A	tRNA (guanine-N(7)-)-methyltransferase, putative
PF3D7_1127500	N/A	protein disulfide-isomerase, putative
PF3D7_1127700	N/A	conserved Plasmodium protein, unknown function
PF3D7_1127800	N/A	TFIIS central domain-containing protein, putative
PF3D7_1128000	N/A	conserved Plasmodium protein, unknown function
PF3D7_1128100	N/A	prefoldin subunit 5, putative
PF3D7_1128300	PFK11	ATP-dependent 6-phosphofructokinase
PF3D7_1128500	mHCF101	Fe-S cluster assembly factor HCF101, putative
PF3D7_1128700	GPI8	GPI-anchor transamidase, putative
PF3D7_1128900	N/A	conserved protein, unknown function
PF3D7_1129000	SpdSyn	spermidine synthase
PF3D7_1129200	RPN7	26S proteasome regulatory subunit RPN7, putative
PF3D7_1129300	N/A	conserved Plasmodium protein, unknown function
PF3D7_1129400	NSUN3	RNA cytosine C(5)-methyltransferase, putative
PF3D7_1129500	N/A	A/G-specific adenine glycosylase, putative
PF3D7_1129600	N/A	phosphatidylinositol-4-phosphate 5-kinase, putative
PF3D7_1129900	MFR5	major facilitator superfamily-related transporter, putative
PF3D7_1130000	PAGM	phosphoacetylglucosamine mutase, putative
PF3D7_1130200	PfP0	60S ribosomal protein P0
PF3D7_1130600	N/A	methyltransferase, putative
PF3D7_1130900	N/A	conserved Plasmodium protein, unknown function
PF3D7_1131100	SR1	serpentine receptor 1, putative
PF3D7_1131200	N/A	conserved Plasmodium protein, unknown function
PF3D7_1131300	N/A	conserved Plasmodium protein, unknown function
PF3D7_1131400	N/A	conserved Plasmodium protein, unknown function
PF3D7_1131500	N/A	conserved Plasmodium protein, unknown function
PF3D7_1131600	N/A	kelch domain-containing protein, putative
PF3D7_1132100	N/A	RNA-binding protein, putative
PF3D7_1132200	TCP1	T-complex protein 1 subunit alpha
PF3D7_1132300	N/A	nucleic acid binding protein, putative
PF3D7_1132400	N/A	conserved Plasmodium membrane protein, unknown function
PF3D7_1132500	N/A	amino acid transporter, putative
PF3D7_1132700	mRPL2	50S ribosomal protein L2, putative
PF3D7_1132900	GCVH	glycine cleavage system H protein
PF3D7_1133000	N/A	conserved Plasmodium protein, unknown function
PF3D7_1133200	N/A	conserved Plasmodium protein, unknown function
PF3D7_1133400	AMA1	apical membrane antigen 1
PF3D7_1133800	N/A	RNA (uracil-5-)methyltransferase, putative
PF3D7_1133900	N/A	conserved Plasmodium protein, unknown function
PF3D7_1134000	HSP70-3	heat shock protein 70
PF3D7_1134200	N/A	conserved Plasmodium protein, unknown function
PF3D7_1134500	N/A	alpha/beta hydrolase, putative
PF3D7_1134600	N/A	zinc finger protein, putative
PF3D7_1135000	N/A	PQ-loop repeat-containing protein
PF3D7_1135100	PPM8	protein phosphatase PPM8, putative
PF3D7_1135300	N/A	conserved Plasmodium membrane protein, unknown function
PF3D7_1135500	N/A	RNA-binding protein, putative
PF3D7_1135600	CAPD3	condensin-2 complex subunit D3, putative
PF3D7_1135700	N/A	conserved Plasmodium protein, unknown function
PF3D7_1136000	N/A	conserved Plasmodium protein, unknown function
PF3D7_1136100	N/A	conserved Plasmodium protein, unknown function
PF3D7_1136200	N/A	conserved Plasmodium protein, unknown function
PF3D7_1136400	SRP72	signal recognition particle subunit SRP72, putative
PF3D7_1136600	N/A	conserved Plasmodium protein, unknown function
PF3D7_1136800	N/A	DnaJ protein, putative
PF3D7_1136900	SUB2	subtilisin-like protease 2
PF3D7_1137400	N/A	UVB-resistance protein UVR8 homologue
PF3D7_1137500	N/A	ribosomal protein S14, apicoplast, putative
PF3D7_1137700	N/A	calcium-binding protein, putative
PF3D7_1137900	N/A	conserved Plasmodium protein, unknown function
PF3D7_1138000	N/A	conserved Plasmodium protein, unknown function
PF3D7_1138200	N/A	conserved protein, unknown function
PF3D7_1138400	GCalpha	guanylyl cyclase alpha
PF3D7_1138500	PPM2	protein phosphatase PPM2
PF3D7_1139500	N/A	AAA family ATPase, putative
PF3D7_1139700	N/A	adrenodoxin reductase, putative
PF3D7_1139800	N/A	conserved Plasmodium protein, unknown function
PF3D7_1140300	N/A	P-loop containing nucleoside triphosphate hydrolase, putative
PF3D7_1140400	N/A	conserved Plasmodium protein, unknown function
PF3D7_1140500	MyoK	myosin K, putative
PF3D7_1140600	N/A	conserved Plasmodium protein, unknown function
PF3D7_1140700	N/A	chromo domain-containing protein, putative
PF3D7_1140900	N/A	NdP1 protein, putative
PF3D7_1141100	N/A	conserved Plasmodium protein, unknown function
PF3D7_1141600	DPM1	dolichol-phosphate mannosyltransferase
PF3D7_1141800	N/A	EELM2 domain-containing protein, putative
PF3D7_1142000	N/A	heptatricopeptide repeat-containing protein, putative
PF3D7_1142100	N/A	conserved Plasmodium protein, unknown function
PF3D7_1142200	N/A	conserved Plasmodium protein, unknown function
PF3D7_1142300	N/A	conserved Plasmodium membrane protein, unknown function
PF3D7_1142500	RPL28	60S ribosomal protein L28
PF3D7_1142700	N/A	methyltransferase, putative
PF3D7_1142800	ATPTG6	ATP synthase-associated protein, putative
PF3D7_1143000	N/A	alpha/beta hydrolase, putative
PF3D7_1143100	AP2-O	AP2 domain transcription factor AP2-O
PF3D7_1143200	N/A	DnaJ protein, putative
PF3D7_1143500	N/A	conserved Plasmodium protein, unknown function
PF3D7_1143700	N/A	conserved Plasmodium protein, unknown function
PF3D7_1143800	CAP93	oocyst capsule protein Cap93, putative
PF3D7_1144000	RPS21	40S ribosomal protein S21
PF3D7_1144100	N/A	mitochondrial large subunit ribosomal protein, putative
PF3D7_1144200	N/A	conserved Plasmodium protein, unknown function
PF3D7_1144600	TFG2	transcription initiation factor IIF subunit beta, putative
PF3D7_1144700	TIC20	apicoplast import protein Tic20, putative
PF3D7_1144900	RAB6	ras-related protein Rab-6
PF3D7_1145000	N/A	conserved Plasmodium protein, unknown function
PF3D7_1145200	N/A	serine/threonine protein kinase, putative
PF3D7_1145300	CRIPT	cysteine-rich PDZ-binding protein, putative
PF3D7_1145500	ABCB3	ABC transporter B family member 3, putative
PF3D7_1145600	N/A	TMEM65 domain-containing protein, putative
PF3D7_1145700	N/A	bicoid-interacting protein BIN3, putative
PF3D7_1145800	N/A	conserved Plasmodium protein, unknown function
PF3D7_1146000	RSA4	ribosome assembly protein 4, putative
PF3D7_1146100	N/A	PH-like domain-containing protein, putative
PF3D7_1146500	LRR10	leucine-rich repeat protein
PF3D7_1146800	N/A	conserved Plasmodium protein, unknown function
PF3D7_1147000	SLARP	sporozoite and liver stage asparagine-rich protein
PF3D7_1147200	N/A	tubulin--tyrosine ligase, putative
PF3D7_1147300	N/A	conserved Plasmodium protein, unknown function
PF3D7_1147500	FTB	protein farnesyltransferase subunit beta
PF3D7_1147800	MAEBL	membrane associated erythrocyte binding-like protein
PF3D7_1147900	PEX22	peroxisome assembly protein 22, putative
PF3D7_1148800	N/A	Plasmodium exported protein (hyp11), unknown function
PF3D7_1149100	N/A	Plasmodium exported protein, unknown function
PF3D7_1149200	RESA3	ring-infected erythrocyte surface antigen
PF3D7_1149700	N/A	Plasmodium exported protein (PHISTa), unknown function, fragment
PF3D7_1149800	RIF	rifin
PF3D7_1149900	N/A	stevor
PF3D7_1150400	VAR	erythrocyte membrane protein 1, PfEMP1
PF3D7_1200100	VAR	erythrocyte membrane protein 1, PfEMP1
PF3D7_1200300	RIF	rifin
PF3D7_1200400	VAR	erythrocyte membrane protein 1, PfEMP1
PF3D7_1200600	VAR2CSA	erythrocyte membrane protein 1, PfEMP1
PF3D7_1200610	N/A	VAR2CSA uORF
PF3D7_1200700	ACS7	acyl-CoA synthetase
PF3D7_1200800	FIKK12	serine/threonine protein kinase, FIKK family
PF3D7_1200900	N/A	Plasmodium exported protein (PHISTc), unknown function
PF3D7_1201100	N/A	RESA-like protein with PHIST and DnaJ domains
PF3D7_1201300	LSAP1	liver stage associated protein 1
PF3D7_1201600	NEK3	NIMA related kinase 3
PF3D7_1201800	COX19	cytochrome c oxidase assembly protein COX19, putative
PF3D7_1202000	PSH2	ATP-dependent DNA/RNA helicase PSH2
PF3D7_1202100	SRAP1	SRAP domain-containing protein, putative
PF3D7_1202300	N/A	dynein heavy chain, putative
PF3D7_1202600	NEMF	nuclear export mediator factor NEMF, putative
PF3D7_1203200	SRP14	signal recognition particle subunit SRP14
PF3D7_1203300	N/A	TBCC domain-containing protein, putative
PF3D7_1203400	MFS4	major facilitator superfamily domain-containing protein, putative
PF3D7_1203500	SUA5	threonylcarbamoyl-AMP synthase, putative
PF3D7_1203600	CC1HL	cytochrome c1 heme lyase, putative
PF3D7_1204100	N/A	conserved Plasmodium protein, unknown function
PF3D7_1204400	G37	sexual stage-specific protein G37, putative
PF3D7_1204500	N/A	conserved protein, unknown function
PF3D7_1205000	N/A	conserved protein, unknown function
PF3D7_1205100	SEPSECS	O-phosphoseryl-tRNA(Sec) selenium transferase, putative
PF3D7_1205200	HADO	HAD domain ookinete protein, putative
PF3D7_1205300	N/A	conserved Plasmodium protein, unknown function
PF3D7_1205500	N/A	zinc finger protein, putative
PF3D7_1205900	N/A	conserved protein, unknown function
PF3D7_1206000	SHLP2	shewanella-like protein phosphatase 2
PF3D7_1206100	ISN1	IMP-specific 5'-nucleotidase 1
PF3D7_1206200	EIF3C	eukaryotic translation initiation factor 3 subunit C, putative
PF3D7_1206300	N/A	conserved Plasmodium protein, unknown function
PF3D7_1206400	TUM1	thiosulfate sulfurtransferase, putative
PF3D7_1206700	EIF5	eukaryotic translation initiation factor 5, putative
PF3D7_1206800	N/A	conserved Plasmodium protein, unknown function
PF3D7_1206900	N/A	conserved Plasmodium protein, unknown function
PF3D7_1207100	N/A	pre-rRNA-processing protein ESF1, putative
PF3D7_1207200	N/A	zinc finger protein, putative
PF3D7_1207300	LIMP	LIMP protein, putative
PF3D7_1207700	N/A	41-3 protein
PF3D7_1208100	N/A	conserved Plasmodium protein, unknown function
PF3D7_1208200	CRMP3	cysteine repeat modular protein 3
PF3D7_1208300	mACP	acyl carrier protein, mitochondrial
PF3D7_1208400	N/A	amino acid transporter, putative
PF3D7_1208800	N/A	zinc finger protein, putative
PF3D7_1209100	N/A	conserved Plasmodium protein, unknown function
PF3D7_1209300	TRZ	telomere repeat-binding zinc finger protein
PF3D7_1209400	CIA1	cytosolic iron-sulfur protein assembly protein 1, putative
PF3D7_1209500	PDEalpha	cGMP-specific 3',5'-cyclic phosphodiesterase alpha
PF3D7_1209600	PBGD	porphobilinogen deaminase
PF3D7_1210000	RPL1	50S ribosomal protein L1, apicoplast, putative
PF3D7_1210200	N/A	zinc finger protein, putative
PF3D7_1210300	N/A	conserved Plasmodium protein, unknown function
PF3D7_1210700	N/A	conserved Plasmodium protein, unknown function
PF3D7_1210900	PIGM	GPI mannosyltransferase 1
PF3D7_1211200	N/A	conserved Plasmodium protein, unknown function
PF3D7_1211300	MCM8	DNA helicase MCM8, putative
PF3D7_1211500	mtRPS18	ribosomal protein S18, mitochondrial
PF3D7_1211600	LSD1	lysine-specific histone demethylase 1, putative
PF3D7_1211900	ATP4	non-SERCA-type Ca2+ -transporting P-ATPase
PF3D7_1212000	TPx(Gl)	glutathione peroxidase-like thioredoxin peroxidase
PF3D7_1212100	PPP1	peripheral plastid protein 1, putative
PF3D7_1212200	N/A	conserved protein, unknown function
PF3D7_1212300	N/A	WD repeat-containing protein, putative
PF3D7_1212400	N/A	tetratricopeptide repeat protein, putative
PF3D7_1212500	GAT	glycerol-3-phosphate 1-O-acyltransferase
PF3D7_1212600	N/A	SND2 domain-containing protein, putative
PF3D7_1212800	SDHB	succinate dehydrogenase [ubiquinone] iron-sulfur subunit, mitochondrial
PF3D7_1213500	N/A	integral membrane protein GPR180, putative
PF3D7_1213800	PRS	proline--tRNA ligase
PF3D7_1213900	N/A	W2 domain-containing protein, putative
PF3D7_1214100	PIGO	GPI ethanolamine phosphate transferase 3, putative
PF3D7_1214700	N/A	conserved protein, unknown function
PF3D7_1214900	N/A	conserved protein, unknown function
PF3D7_1215000	Trx-Px2	thioredoxin peroxidase 2
PF3D7_1215200	CYP32	peptidyl-prolyl cis-trans isomerase
PF3D7_1215900	SR10	serpentine receptor 10
PF3D7_1216400	N/A	conserved Plasmodium membrane protein, unknown function
PF3D7_1216600	CelTOS	cell traversal protein for ookinetes and sporozoites
PF3D7_1216900	N/A	DNA-binding chaperone, putative
PF3D7_1217000	N/A	conserved protein, unknown function
PF3D7_1217100	SPO11	meiotic recombination protein SPO11, putative
PF3D7_1217200	MRD1	multiple RNA-binding domain-containing protein 1, putative
PF3D7_1217300	EngA	GTP-binding protein EngA
PF3D7_1217900	N/A	PPPDE peptidase domain-containing protein, putative
PF3D7_1218000	TRAMP	thrombospondin-related apical membrane protein
PF3D7_1218100	N/A	conserved Plasmodium protein, unknown function
PF3D7_1218300	AP2-MU	AP-2 complex subunit mu
PF3D7_1218500	DRPC	dynamin-like protein, putative
PF3D7_1218600	RRS	arginine--tRNA ligase
PF3D7_1218800	PSOP17	secreted ookinete protein, putative
PF3D7_1219000	FRM2	formin 2
PF3D7_1219100	CHC	clathrin heavy chain, putative
PF3D7_1219300	VAR	erythrocyte membrane protein 1, PfEMP1
PF3D7_1219600	ATP2	phospholipid-transporting ATPase 2
PF3D7_1219800	N/A	conserved Plasmodium protein, unknown function
PF3D7_1220000	N/A	zinc finger protein, putative
PF3D7_1220300	N/A	cell cycle associated protein, putative
PF3D7_1220400	DRN1	debranching enzyme-associated ribonuclease, putative
PF3D7_1220500	TSR3	ribosome biogenesis protein TSR3, putative
PF3D7_1220600	N/A	conserved Plasmodium protein, unknown function
PF3D7_1220700	N/A	conserved Plasmodium protein, unknown function
PF3D7_1221000	SET10	histone-lysine N-methyltransferase, H3 lysine-4 specific
PF3D7_1221100	N/A	conserved Plasmodium protein, unknown function
PF3D7_1221300	N/A	conserved Plasmodium protein, unknown function
PF3D7_1221400	IMC1h	inner membrane complex protein 1h, putative
PF3D7_1221700	N/A	FbpA domain protein, putative
PF3D7_1221800	N/A	conserved protein, unknown function
PF3D7_1222000	N/A	tRNA-splicing ligase RtcB, putative
PF3D7_1222300	GRP94	endoplasmin, putative
PF3D7_1222400	ApiAP2	AP2 domain transcription factor
PF3D7_1222500	DPH6	diphthine--ammonia ligase, putative
PF3D7_1222600	AP2-G	AP2 domain transcription factor AP2-G
PF3D7_1222700	GAP45	glideosome-associated protein 45
PF3D7_1222800	N/A	conserved Plasmodium protein, unknown function
PF3D7_1222900	N/A	conserved Plasmodium protein, unknown function
PF3D7_1223100	PKAr	cAMP-dependent protein kinase regulatory subunit
PF3D7_1223200	N/A	nucleus export protein BRR6, putative
PF3D7_1223300	GyrA	DNA gyrase subunit A
PF3D7_1223400	N/A	phospholipid-transporting ATPase, putative
PF3D7_1223500	N/A	conserved Plasmodium protein, unknown function
PF3D7_1223600	N/A	conserved Plasmodium protein, unknown function
PF3D7_1223800	YHM2	citrate/oxoglutarate carrier protein, putative
PF3D7_1224100	N/A	conserved protein, unknown function
PF3D7_1224200	N/A	BRO1 domain-containing protein, putative
PF3D7_1224400	N/A	WD repeat-containing protein, putative
PF3D7_1224500	ASF1	histone chaperone ASF1
PF3D7_1224600	CCHL	cytochrome c heme lyase, putative
PF3D7_1224700	N/A	conserved Plasmodium protein, unknown function
PF3D7_1224800	N/A	conserved protein, unknown function
PF3D7_1225000	N/A	conserved Plasmodium protein, unknown function
PF3D7_1225100	api-IRS	isoleucine--tRNA ligase, putative
PF3D7_1225700	N/A	VAC14 domain-containing protein, putative
PF3D7_1225800	UBA1	ubiquitin-activating enzyme E1
PF3D7_1226000	N/A	conserved protein, unknown function
PF3D7_1226500	N/A	heptatricopeptide repeat and RAP domain-containing protein, putative
PF3D7_1226600	PCNA2	proliferating cell nuclear antigen 2
PF3D7_1226700	RRP9	U3 small nucleolar RNA-interacting protein 2, putative
PF3D7_1226900	PV2	parasitophorous vacuolar protein 2
PF3D7_1227000	N/A	conserved Plasmodium protein, unknown function
PF3D7_1227100	DH60	DNA helicase 60
PF3D7_1227200	K1	potassium channel K1
PF3D7_1227300	N/A	conserved Plasmodium protein, unknown function
PF3D7_1227400	N/A	conserved Plasmodium protein, unknown function
PF3D7_1227500	SOC2	protein SOC2, putative
PF3D7_1227900	RPUSP	RNA pseudouridylate synthase, putative
PF3D7_1228100	LRR13	leucine-rich repeat protein
PF3D7_1228200	N/A	conserved Plasmodium protein, unknown function
PF3D7_1228300	NEK1	NIMA related kinase 1
PF3D7_1228400	N/A	conserved Plasmodium protein, unknown function
PF3D7_1228600	MSP9	merozoite surface protein 9
PF3D7_1228700	N/A	conserved Plasmodium protein, unknown function
PF3D7_1228800	N/A	WD repeat-containing protein, putative
PF3D7_1228900	N/A	conserved protein, unknown function
PF3D7_1229000	N/A	conserved Plasmodium membrane protein, unknown function
PF3D7_1229100	MRP2	multidrug resistance-associated protein 2
PF3D7_1229300	PIC1	PhIL1-interacting candidate PIC1
PF3D7_1229400	MIF	macrophage migration inhibitory factor
PF3D7_1230000	N/A	TBC domain-containing protein, putative
PF3D7_1230300	SPM2	subpellicular microtubule protein 2, putative
PF3D7_1230400	ClpQ	ATP-dependent protease subunit ClpQ
PF3D7_1230500	N/A	WD repeat-containing protein, putative
PF3D7_1230700	SEC13	protein transport protein SEC13
PF3D7_1230900	RIO1	serine/threonine protein kinase RIO1, putative
PF3D7_1231000	N/A	conserved Plasmodium protein, unknown function
PF3D7_1231100	RAB2	ras-related protein Rab-2
PF3D7_1231300	N/A	conserved Plasmodium protein, unknown function
PF3D7_1231900	N/A	WD repeat-containing protein, putative
PF3D7_1232000	aFRS	phenylalanine--tRNA ligase
PF3D7_1232100	CPN60	60 kDa chaperonin
PF3D7_1232200	LPD1	dihydrolipoyl dehydrogenase, mitochondrial
PF3D7_1232500	N/A	CG2-related protein, putative
PF3D7_1232600	N/A	conserved Plasmodium protein, unknown function
PF3D7_1232700	ND9	Nd9 protein
PF3D7_1232800	N/A	conserved Plasmodium protein, unknown function
PF3D7_1232900	N/A	nucleotidyltransferase, putative
PF3D7_1233000	EF-G	elongation factor G
PF3D7_1233200	N/A	conserved Plasmodium protein, unknown function
PF3D7_1233300	PPR2	pentatricopeptide repeat domain-containing protein 2, putative
PF3D7_1233600	AARP1	asparagine and aspartate rich protein 1
PF3D7_1233700	N/A	homocysteine S-methyltransferase, putative
PF3D7_1233900	SENP1	sentrin-specific protease 1
PF3D7_1234000	N/A	conserved Plasmodium protein, unknown function
PF3D7_1234100	BDP5	bromodomain protein 5
PF3D7_1234300	N/A	DNA polymerase epsilon subunit B, putative
PF3D7_1234400	MiGS	microgamete surface protein MiGS, putative
PF3D7_1234500	N/A	conserved Plasmodium protein, unknown function
PF3D7_1234600	TOC75	protein TOC75, putative
PF3D7_1234700	ULG8	upregulated in late gametocytes ULG8
[truncated: 1,106 more rows]

## Sheet: Union2
PalmitoylProtein	Name	Product
PF3D7_0102200	RESA	ring-infected erythrocyte surface antigen
PF3D7_0102600	FIKK1	serine/threonine protein kinase, FIKK family
PF3D7_0103200	NT4	nucleoside transporter 4
PF3D7_0103900	PIESP15	parasite-infected erythrocyte surface protein
PF3D7_0104100	N/A	protein E140, putative
PF3D7_0104800	NPT1	novel putative transporter 1, putative
PF3D7_0105200	N/A	heptatricopeptide repeat and RAP domain-containing protein, putative
PF3D7_0106800	RAB5c	ras-related protein Rab-5C
PF3D7_0107500	NCR1	Niemann-Pick type C1-related protein
PF3D7_0112900	N/A	Plasmodium exported protein, unknown function
PF3D7_0113900	CBP1	CX3CL1-binding protein 1
PF3D7_0202000	KAHRP	knob-associated histidine-rich protein
PF3D7_0204700	HT1	hexose transporter
PF3D7_0207500	SERA6	serine repeat antigen 6
PF3D7_0207600	SERA5	serine repeat antigen 5
PF3D7_0208800	N/A	protein P22, putative
PF3D7_0210200	N/A	conserved Plasmodium protein, unknown function
PF3D7_0210600	CERLI1	protein CERLI1
PF3D7_0211800	AsnRS	asparagine--tRNA ligase
PF3D7_0212400	N/A	conserved Plasmodium membrane protein, unknown function
PF3D7_0212500	N/A	conserved Plasmodium protein, unknown function
PF3D7_0213100	SIS1	protein SIS1
PF3D7_0215300	ACS8	acyl-CoA synthetase
PF3D7_0215900	DHHC11	palmitoyltransferase DHHC11, putative
PF3D7_0217500	CDPK1	calcium-dependent protein kinase 1
PF3D7_0220200	N/A	Plasmodium exported protein, unknown function
PF3D7_0220800	CLAG2	cytoadherence linked asexual protein 2
PF3D7_0302500	CLAG3.1	cytoadherence linked asexual protein 3.1
PF3D7_0303700	BCKDH-E2	lipoamide acyltransferase component of branched-chain alpha-keto acid dehydrogenase complex
PF3D7_0304100	IMC1e	inner membrane complex protein 1e, putative
PF3D7_0306400	N/A	FAD-dependent glycerol-3-phosphate dehydrogenase, putative
PF3D7_0308200	CCT7	T-complex protein 1 subunit eta
PF3D7_0308600	PRPF19	pre-mRNA-processing factor 19, putative
PF3D7_0309600	PfP2	60S acidic ribosomal protein P2
PF3D7_0310400	PIESP1	parasite-infected erythrocyte surface protein
PF3D7_0316600	FNT	formate-nitrite transporter
PF3D7_0316900	N/A	E3 ubiquitin-protein ligase, putative
PF3D7_0317000	N/A	proteasome subunit alpha type-3, putative
PF3D7_0318900	N/A	conserved protein, unknown function
PF3D7_0319700	ABCI3	ABC transporter I family member 1, putative
PF3D7_0320800	DOZI	ATP-dependent RNA helicase DDX6
PF3D7_0402000	N/A	Plasmodium exported protein (PHISTa), unknown function
PF3D7_0405600	N/A	TMEM33 domain-containing protein, putative
PF3D7_0407200	PTH2	peptidyl-tRNA hydrolase 2, putative
PF3D7_0409400	DnaJ	chaperone protein DnaJ
PF3D7_0413500	PGM2	phosphoglucomutase-2
PF3D7_0417300	N/A	LETM1-like protein, putative
PF3D7_0418500	BET3	trafficking protein particle complex subunit 3, putative
PF3D7_0419700	Pf34	apical merozoite protein
PF3D7_0423500	GAPM2	glideosome associated protein with multiple membrane spans 2
PF3D7_0424500	FIKK4.1	serine/threonine protein kinase, FIKK family
PF3D7_0500800	MESA	mature parasite-infected erythrocyte surface antigen
PF3D7_0501000	N/A	Plasmodium exported protein, unknown function
PF3D7_0501500	RAP3	rhoptry-associated protein 3
PF3D7_0501600	RAP2	rhoptry-associated protein 2
PF3D7_0504600	BCKDHB	2-oxoisovalerate dehydrogenase subunit beta, mitochondrial, putative
PF3D7_0506900	ROM4	rhomboid protease ROM4
PF3D7_0508000	P38	6-cysteine protein
PF3D7_0508900	AAP6	protein AAP6
PF3D7_0511200	SCD	stearoyl-CoA desaturase
PF3D7_0513600	N/A	deoxyribodipyrimidine photo-lyase, putative
PF3D7_0520900	SAHH	adenosylhomocysteinase
PF3D7_0522600	N/A	magnesium transporter NIPA, putative
PF3D7_0523000	MDR1	multidrug resistance protein 1
PF3D7_0525800	IMC1g	inner membrane complex protein 1g, putative
PF3D7_0528400	DHHC7	palmitoyltransferase DHHC7
PF3D7_0529000	TIP	T-cell immunomodulatory protein homolog, putative
PF3D7_0529800	N/A	conserved Plasmodium protein, unknown function
PF3D7_0532300	N/A	Plasmodium exported protein (PHISTb), unknown function
PF3D7_0601200	MC-2TM	Pfmc-2TM Maurer's cleft two transmembrane protein
PF3D7_0604100	SIP2	AP2 domain transcription factor
PF3D7_0604700	GILP	glyoxalase I-like protein GILP
PF3D7_0606800	VFT1	VFT protein
PF3D7_0607400	N/A	G-protein associated signal transduction protein, putative
PF3D7_0607700	N/A	conserved Plasmodium protein, unknown function
PF3D7_0608300	N/A	heptatricopeptide repeat-containing protein, putative
PF3D7_0608310	SAM50	sorting assembly machinery 50 kDa subunit, putative
PF3D7_0608700	CCT6	T-complex protein 1 subunit zeta
PF3D7_0609100	ZIP1	zinc transporter ZIP1, putative
PF3D7_0609200	N/A	citrate synthase-like protein, putative
PF3D7_0609800	DHHC2	palmitoyltransferase DHHC2, putative
PF3D7_0612200	LRR6	leucine-rich repeat protein
PF3D7_0612700	P12	6-cysteine protein P12
PF3D7_0612800	P12p	6-cysteine protein P12p
PF3D7_0613900	MyoE	myosin E, putative
PF3D7_0614300	MFR1	major facilitator superfamily-related transporter, putative
PF3D7_0617000	TOM40	mitochondrial import receptor subunit TOM40, putative
PF3D7_0618000	N/A	conserved Plasmodium membrane protein, unknown function
PF3D7_0620400	MSP10	merozoite surface protein 10
PF3D7_0621200	PDX1	pyridoxine biosynthesis protein PDX1
PF3D7_0626800	PyrK	pyruvate kinase
PF3D7_0628300	CEPT	choline/ethanolaminephosphotransferase, putative
PF3D7_0629200	N/A	DnaJ protein, putative
PF3D7_0702500	N/A	Plasmodium exported protein, unknown function
PF3D7_0703900	N/A	conserved Plasmodium membrane protein, unknown function
PF3D7_0704800	PPM12	protein phosphatase PPM12, putative
PF3D7_0705400	MCM7	DNA replication licensing factor MCM7
PF3D7_0708400	HSP90	heat shock protein 90
PF3D7_0713100	MC-2TM	Pfmc-2TM Maurer's cleft two transmembrane protein
PF3D7_0714300	DHHC4	palmitoyltransferase DHHC4, putative
PF3D7_0715200	N/A	conserved Plasmodium protein, unknown function
PF3D7_0719600	N/A	60S ribosomal protein L11a, putative
PF3D7_0729200	AOP	1-cys peroxiredoxin
PF3D7_0731600	ACS5	acyl-CoA synthetase
PF3D7_0800200	VAR	erythrocyte membrane protein 1, PfEMP1
PF3D7_0802200	1-CysPxn	1-cys peroxiredoxin
PF3D7_0804500	N/A	conserved Plasmodium membrane protein, unknown function
PF3D7_0806800	N/A	V-type proton ATPase subunit a, putative
PF3D7_0807300	RAB18	ras-related protein Rab-18
PF3D7_0811600	N/A	conserved protein, unknown function
PF3D7_0812100	N/A	proteasome activator complex subunit 4, putative
PF3D7_0816200	VPS2	vacuolar protein sorting-associated protein 2, putative
PF3D7_0816900	AK2	adenylate kinase 2
PF3D7_0818200	14-3-3I	14-3-3 protein
PF3D7_0820400	N/A	conserved Plasmodium protein, unknown function
PF3D7_0821000	N/A	conserved Plasmodium protein, unknown function
PF3D7_0822900	PIC2	PhIL1-interacting candidate PIC2
PF3D7_0828800	GAMA	GPI-anchored micronemal antigen
PF3D7_0829500	N/A	conserved Plasmodium protein, unknown function
PF3D7_0831600	CLAG8	cytoadherence linked asexual protein 8
PF3D7_0904800	RPA1	replication protein A1, small fragment
PF3D7_0904900	CuTP	copper-transporting ATPase
PF3D7_0905100	NUP221	nucleoporin NUP221, putative
PF3D7_0910300	N/A	conserved protein, unknown function
PF3D7_0910800	NBP35	cytosolic Fe-S cluster assembly factor NBP35, putative
PF3D7_0912400	N/A	alkaline phosphatase, putative
PF3D7_0915000	NDH2	type II NADH:ubiquinone oxidoreductase
PF3D7_0916400	N/A	conserved Plasmodium protein, unknown function
PF3D7_0918000	GAP50	glideosome-associated protein 50
PF3D7_0919900	RCC-PIP	regulator of chromosome condensation-PP1-interacting protein
PF3D7_0922200	SAMS	S-adenosylmethionine synthetase
PF3D7_0923800	TRXR	thioredoxin reductase
PF3D7_0929400	RhopH2	high molecular weight rhoptry protein 2
PF3D7_0930300	MSP1	merozoite surface protein 1
PF3D7_0932500	DHHC6	palmitoyltransferase DHHC6, putative
PF3D7_0934500	N/A	V-type proton ATPase subunit E, putative
PF3D7_0935800	CLAG9	cytoadherence linked asexual protein 9
PF3D7_1003600	IMC1c	inner membrane complex protein 1c, putative
PF3D7_1005500	UPF1	regulator of nonsense transcripts 1, putative
PF3D7_1008700	N/A	tubulin beta chain
PF3D7_1008900	AK1	adenylate kinase
PF3D7_1010700	N/A	dolichyl-phosphate-mannose--protein mannosyltransferase, putative
PF3D7_1011000	ISP1	inner membrane complex sub-compartment protein 1
PF3D7_1011500	N/A	conserved protein, unknown function
PF3D7_1012400	HGPRT	hypoxanthine-guanine phosphoribosyltransferase
PF3D7_1012600	GMPS	GMP synthase [glutamine-hydrolyzing]
PF3D7_1012900	ATG18	autophagy-related protein 18
PF3D7_1013300	N/A	conserved Plasmodium protein, unknown function
PF3D7_1018300	N/A	peptidase, putative
PF3D7_1019900	ATG8	autophagy-related protein 8
PF3D7_1022300	ZIPCO	ZIP domain-containing protein, putative
PF3D7_1022700	PLSCR	phospholipid scramblase
PF3D7_1025900	N/A	conserved protein, unknown function
PF3D7_1027800	RPL3	60S ribosomal protein L3
PF3D7_1027900	DHHC10	palmitoyltransferase DHHC10, putative
PF3D7_1029600	ADA	adenosine deaminase
PF3D7_1033200	ETRAMP10.2	early transcribed membrane protein 10.2
PF3D7_1037100	PyKII	pyruvate kinase 2
PF3D7_1101700	MC-2TM	Pfmc-2TM Maurer's cleft two transmembrane protein
PF3D7_1104400	Trx-mero	thioredoxin-like mero protein
PF3D7_1108700	Pfj2	heat shock protein J2
PF3D7_1111900	N/A	Josephin domain-containing protein, putative
PF3D7_1113100	PRL	protein tyrosine phosphatase
PF3D7_1115600	CYP19B	peptidyl-prolyl cis-trans isomerase
PF3D7_1115900	DHHC9	palmitoyltransferase DHHC9
PF3D7_1116100	N/A	serine esterase, putative
PF3D7_1117300	N/A	conserved protein, unknown function
PF3D7_1118200	N/A	heat shock protein 90, putative
PF3D7_1119800	ASF1	alternative splicing factor ASF-1, putative
PF3D7_1121000	DHHC3	palmitoyltransferase DHHC3
PF3D7_1123300	N/A	RING zinc finger protein, putative
PF3D7_1123500	GP2	golgi protein 2
PF3D7_1124000	ERO1	endoplasmic reticulum oxidoreductin, putative
PF3D7_1124600	EK	ethanolamine kinase
PF3D7_1126000	ThrRS	threonine--tRNA ligase
PF3D7_1127500	N/A	protein disulfide-isomerase, putative
PF3D7_1129000	SpdSyn	spermidine synthase
PF3D7_1129900	MFR5	major facilitator superfamily-related transporter, putative
PF3D7_1130200	PfP0	60S ribosomal protein P0
PF3D7_1132200	TCP1	T-complex protein 1 subunit alpha
PF3D7_1132300	N/A	nucleic acid binding protein, putative
PF3D7_1134000	HSP70-3	heat shock protein 70
PF3D7_1136800	N/A	DnaJ protein, putative
PF3D7_1137400	N/A	UVB-resistance protein UVR8 homologue
PF3D7_1140400	N/A	conserved Plasmodium protein, unknown function
PF3D7_1142100	N/A	conserved Plasmodium protein, unknown function
PF3D7_1143200	N/A	DnaJ protein, putative
PF3D7_1149200	RESA3	ring-infected erythrocyte surface antigen
PF3D7_1200700	ACS7	acyl-CoA synthetase
PF3D7_1201100	N/A	RESA-like protein with PHIST and DnaJ domains
PF3D7_1202100	SRAP1	SRAP domain-containing protein, putative
PF3D7_1211600	LSD1	lysine-specific histone demethylase 1, putative
PF3D7_1211900	ATP4	non-SERCA-type Ca2+ -transporting P-ATPase
PF3D7_1212000	TPx(Gl)	glutathione peroxidase-like thioredoxin peroxidase
PF3D7_1212500	GAT	glycerol-3-phosphate 1-O-acyltransferase
PF3D7_1214900	N/A	conserved protein, unknown function
PF3D7_1218500	DRPC	dynamin-like protein, putative
PF3D7_1219600	ATP2	phospholipid-transporting ATPase 2
PF3D7_1222300	GRP94	endoplasmin, putative
PF3D7_1222700	GAP45	glideosome-associated protein 45
PF3D7_1223400	N/A	phospholipid-transporting ATPase, putative
PF3D7_1224100	N/A	conserved protein, unknown function
PF3D7_1225800	UBA1	ubiquitin-activating enzyme E1
PF3D7_1226900	PV2	parasitophorous vacuolar protein 2
PF3D7_1229300	PIC1	PhIL1-interacting candidate PIC1
PF3D7_1229400	MIF	macrophage migration inhibitory factor
PF3D7_1232100	CPN60	60 kDa chaperonin
PF3D7_1232200	LPD1	dihydrolipoyl dehydrogenase, mitochondrial
PF3D7_1232600	N/A	conserved Plasmodium protein, unknown function
PF3D7_1235200	VP2	V-type K+-independent H+-translocating inorganic pyrophosphatase
PF3D7_1237700	N/A	conserved protein, unknown function
PF3D7_1238800	ACS11	acyl-CoA synthetase
PF3D7_1246300	KIC4	protein KIC4
PF3D7_1246400	MTIP	myosin A-tail interacting protein
PF3D7_1252100	RON3	rhoptry neck protein 3
PF3D7_1302800	N/A	40S ribosomal protein S7, putative
PF3D7_1304100	LigI	DNA ligase I
PF3D7_1306200	N/A	conserved protein, unknown function
PF3D7_1309200	PPM6	protein phosphatase PPM6, putative
PF3D7_1310600	RAB5b	ras-related protein Rab-5B
PF3D7_1310700	PIC5	PhIL1-interacting candidate PIC5
PF3D7_1311800	M1AAP	M1-family alanyl aminopeptidase
PF3D7_1315000	N/A	conserved protein, unknown function
PF3D7_1315300	N/A	conserved protein, unknown function
PF3D7_1318000	N/A	conserved protein, unknown function
PF3D7_1320600	RAB11a	ras-related protein Rab-11A
PF3D7_1321400	DHHC8	palmitoyltransferase DHHC8, putative
PF3D7_1322500	DHHC5	palmitoyltransferase DHHC5
PF3D7_1324700	YKT6.2	SNARE protein, putative
PF3D7_1325100	N/A	phosphoribosylpyrophosphate synthetase
PF3D7_1328100	N/A	proteasome subunit beta type-7, putative
PF3D7_1331800	N/A	60S ribosomal protein L23, putative
PF3D7_1334500	MSRP6	MSP7-like protein
PF3D7_1335100	MSP7	merozoite surface protein 7
PF3D7_1338300	EF-1gamma	elongation factor 1-gamma, putative
PF3D7_1342100	IRP	aconitate hydratase
PF3D7_1342400	CK2beta2	casein kinase II beta chain
PF3D7_1344200	GRP170	endoplasmic reticulum chaperone GRP170
PF3D7_1344800	ATCase	aspartate carbamoyltransferase
PF3D7_1345100	TRX2	thioredoxin 2
PF3D7_1345700	IDH	isocitrate dehydrogenase [NADP], mitochondrial
PF3D7_1345800	N/A	conserved Plasmodium protein, unknown function
PF3D7_1346100	SEC61A	protein transport protein SEC61 subunit alpha
PF3D7_1346400	N/A	VPS13 domain-containing protein, putative
PF3D7_1347200	NT1	nucleoside transporter 1
PF3D7_1349200	N/A	glutamate--tRNA ligase, putative
PF3D7_1351700	IMC1f	inner membrane complex protein 1f, putative
PF3D7_1352500	N/A	thioredoxin-related protein, putative
PF3D7_1353200	MAHRP2	membrane associated histidine-rich protein 2
PF3D7_1353700	ROMO1	reactive oxygen species modulator 1, putative
PF3D7_1359600	N/A	conserved Plasmodium protein, unknown function
PF3D7_1359900	N/A	conserved Plasmodium membrane protein, unknown function
PF3D7_1360800	FLN	falcilysin
PF3D7_1361500	N/A	PH domain-containing protein, putative
PF3D7_1361900	PCNA1	proliferating cell nuclear antigen 1
PF3D7_1362400	Pcalp	calpain
PF3D7_1364100	P92	6-cysteine protein P92
PF3D7_1365700	N/A	SNARE associated Golgi protein, putative
PF3D7_1370300	MAHRP1	membrane associated histidine-rich protein 1
PF3D7_1401200	N/A	Plasmodium exported protein, unknown function
PF3D7_1406800	GAPM3	glideosome associated protein with multiple membrane spans 3
PF3D7_1407200	N/A	conserved Plasmodium protein, unknown function
PF3D7_1408000	PMII	plasmepsin II
PF3D7_1409600	N/A	histidine phosphatase, putative
PF3D7_1410700	N/A	conserved protein, unknown function
PF3D7_1411100	N/A	conserved Plasmodium membrane protein, unknown function
PF3D7_1412800	NMT	glycylpeptide N-tetradecanoyltransferase
PF3D7_1416500	GDH1	NADP-specific glutamate dehydrogenase
PF3D7_1419200	ATrx1	thioredoxin-like protein, putative
PF3D7_1420700	P113	surface protein P113
PF3D7_1421900	CTR2	copper transporter, putative
PF3D7_1424100	RPL5	60S ribosomal protein L5, putative
PF3D7_1434500	N/A	dynein-related AAA-type ATPase, putative
PF3D7_1437200	N/A	ribonucleoside-diphosphate reductase large subunit, putative
PF3D7_1438100	SEC62	translocation protein SEC62, putative
PF3D7_1439000	CTR1	copper transporter
PF3D7_1439400	N/A	cytochrome b-c1 complex subunit Rieske, putative
PF3D7_1440500	N/A	allantoicase, putative
PF3D7_1441500	N/A	conserved Plasmodium protein, unknown function
PF3D7_1442300	tRIP	tRNA import protein tRIP
PF3D7_1444100	N/A	conserved Plasmodium protein, unknown function
PF3D7_1444300	LPAAT	1-acyl-sn-glycerol-3-phosphate acyltransferase, putative
PF3D7_1446200	LAP	M17 leucyl aminopeptidase
PF3D7_1451100	eEF2	elongation factor 2
PF3D7_1452200	N/A	aminomethyltransferase, putative
PF3D7_1454400	APP	aminopeptidase P
PF3D7_1455300	N/A	conserved protein, unknown function
PF3D7_1455400	HlyIII	hemolysin III
PF3D7_1456800	VP1	V-type H(+)-translocating pyrophosphatase, putative
PF3D7_1458000	FP1	cysteine proteinase falcipain 1
PF3D7_1459400	N/A	conserved protein, unknown function
PF3D7_1459800	N/A	bax inhibitor 1, putative
PF3D7_1460100	FCP	FYVE and coiled-coil domain-containing protein
PF3D7_1460600	ISP3	inner membrane complex sub-compartment protein 3
PF3D7_1461400	N/A	MORN repeat protein, putative
PF3D7_1462300	N/A	GTP-binding protein, putative
PF3D7_1463900	RON11	rhoptry neck protein 11, putative
PF3D7_1468700	eIF4A	eukaryotic initiation factor 4A
PF3D7_1470600	N/A	RAP protein, putative
PF3D7_1478600	PTP3	EMP1-trafficking protein
