# Supplementary material for: Complementary crosstalk between palmitoylation and phosphorylation events in MTIP regulates its role during Plasmodium falciparum invasion
Source: Front Cell Infect Microbiol. 2022 Sep 29;12:924424. doi: 10.3389/fcimb.2022.924424 (PMC9556994; doi:10.3389/fcimb.2022.924424)
Supplement: Supplementary Table 4 — A list of all the PTM events and sites pertaining to Plasmodium falciparum 3D7 proteome. [file Table_4.xlsx]

## Sheet: PF3D7_PTMEvents
Protein	Isoform	Name	AAPosition	AAResidue	Source	PTM.Type
PF3D7_0407800	PF3D7_0407800.1	CINCH	1686	S	Curated	Phosphorylation
PF3D7_0729100	PF3D7_0729100.1	N/A	1105	S	Curated	Phosphorylation
PF3D7_1467900	PF3D7_1467900.1	N/A	700	S	Curated	Phosphorylation
PF3D7_0609000	PF3D7_0609000.1	NUP637	3505	S	Curated	Phosphorylation
PF3D7_1230700	PF3D7_1230700.1	SEC13	640	S	Curated	Phosphorylation
PF3D7_0613300	PF3D7_0613300.1	ROP14	486	S	Curated	Phosphorylation
PF3D7_0109000	PF3D7_0109000.1	PHIL1	167	S	Curated	Phosphorylation
PF3D7_1022400	PF3D7_1022400.1	SRSF4	207	S	Curated	Phosphorylation
PF3D7_1336400	PF3D7_1336400.1	N/A	281	S	Curated	Phosphorylation
PF3D7_0723300	PF3D7_0723300.1	N/A	60	S	Curated	Phosphorylation
PF3D7_0927200	PF3D7_0927200.1	N/A	643	S	Curated	Phosphorylation
PF3D7_0615900	PF3D7_0615900.1	N/A	814	S	Curated	Phosphorylation
PF3D7_1410400	PF3D7_1410400.1	RAP1	183	S	Curated	Phosphorylation
PF3D7_1321500	PF3D7_1321500.1	PDEbeta	82	S	Curated	Phosphorylation
PF3D7_0709000	PF3D7_0709000.1	CRT	420	S	Curated	Phosphorylation
PF3D7_1251200	PF3D7_1251200.1	N/A	352	S	Curated	Phosphorylation
PF3D7_0812400	PF3D7_0812400.1	KARalpha	84	S	Curated	Phosphorylation
PF3D7_0803200	PF3D7_0803200.1	N/A	263	S	Curated	Phosphorylation
PF3D7_0508000	PF3D7_0508000.1	P38	316	S	Curated	Phosphorylation
PF3D7_1003600	PF3D7_1003600.1	IMC1c	277	S	Curated	Phosphorylation
PF3D7_1018600	PF3D7_1018600.1	N/A	1049	S	Curated	Phosphorylation
PF3D7_1462400	PF3D7_1462400.1	N/A	820	S	Curated	Phosphorylation
PF3D7_0106700	PF3D7_0106700.1	AARP2	632	S	Curated	Phosphorylation
PF3D7_1348900	PF3D7_1348900.1	N/A	27	S	Curated	Phosphorylation
PF3D7_0618000	PF3D7_0618000.1	N/A	450	T	Curated	Phosphorylation
PF3D7_0906300	PF3D7_0906300.1	N/A	126	S	Curated	Phosphorylation
PF3D7_1003600	PF3D7_1003600.1	IMC1c	146	S	Curated	Phosphorylation
PF3D7_0609700	PF3D7_0609700.1	KIC6	1724	S	Curated	Phosphorylation
PF3D7_0422300	PF3D7_0422300.1	N/A	340	S	Curated	Phosphorylation
PF3D7_1026600	PF3D7_1026600.1	N/A	198	S	Curated	Phosphorylation
PF3D7_1405700	PF3D7_1405700.1	N/A	526	T	Curated	Phosphorylation
PF3D7_0606000	PF3D7_0606000.1	KIC1	291	Y	Curated	Phosphorylation
PF3D7_1409800	PF3D7_1409800.1	CELF2	512	T	Curated	Phosphorylation
PF3D7_1235300	PF3D7_1235300.1	NOT4	74	S	Curated	Phosphorylation
PF3D7_0714200	PF3D7_0714200.1	N/A	330	S	Curated	Phosphorylation
PF3D7_0727800	PF3D7_0727800.1	N/A	1658	S	Curated	Phosphorylation
PF3D7_1116100	PF3D7_1116100.1	N/A	520	S	Curated	Phosphorylation
PF3D7_0303200	PF3D7_0303200.1	N/A	478	S	Curated	Phosphorylation
PF3D7_0618000	PF3D7_0618000.1	N/A	787	S	Curated	Phosphorylation
PF3D7_0532100	PF3D7_0532100.1	ETRAMP5	152	S	Curated	Phosphorylation
PF3D7_0606000	PF3D7_0606000.1	KIC1	1015	S	Curated	Phosphorylation
PF3D7_0506900	PF3D7_0506900.1	ROM4	114	S	Curated	Phosphorylation
PF3D7_0107500	PF3D7_0107500.1	NCR1	877	S	Curated	Phosphorylation
PF3D7_1227700	PF3D7_1227700.1	KIC2	49	T	Curated	Phosphorylation
PF3D7_1308900	PF3D7_1308900.1	DCP2	743	S	Curated	Phosphorylation
PF3D7_0619400	PF3D7_0619400.1	N/A	512	S	Curated	Phosphorylation
PF3D7_1322200	PF3D7_1322200.1	N/A	3186	S	Curated	Phosphorylation
PF3D7_1112400	PF3D7_1112400.1	N/A	168	S	Curated	Phosphorylation
PF3D7_0801800	PF3D7_0801800.1	N/A	608	S	Curated	Phosphorylation
PF3D7_0903500	PF3D7_0903500.1	NUP138	416	S	Curated	Phosphorylation
PF3D7_0423500	PF3D7_0423500.1	GAPM2	329	Y	Curated	Phosphorylation
PF3D7_0202600	PF3D7_0202600.1	N/A	704	S	Curated	Phosphorylation
PF3D7_1319100	PF3D7_1319100.1	N/A	383	S	Curated	Phosphorylation
PF3D7_1138000	PF3D7_1138000.1	N/A	1947	S	Curated	Phosphorylation
PF3D7_1227200	PF3D7_1227200.1	K1	160	S	Curated	Phosphorylation
PF3D7_0517400	PF3D7_0517400.1	FACT-L	1027	S	Curated	Phosphorylation
PF3D7_0628100	PF3D7_0628100.1	HECT1	7723	S	Curated	Phosphorylation
PF3D7_1343800	PF3D7_1343800.1	N/A	6066	S	Curated	Phosphorylation
PF3D7_1357500	PF3D7_1357500.1	N/A	187	S	Curated	Phosphorylation
PF3D7_0918700	PF3D7_0918700.1	N/A	503	S	Curated	Phosphorylation
PF3D7_0723300	PF3D7_0723300.1	N/A	346	S	Curated	Phosphorylation
PF3D7_0508100	PF3D7_0508100.1	SET9	1120	T	Curated	Phosphorylation
PF3D7_0314700	PF3D7_0314700.1	RNF1	357	T	Curated	Phosphorylation
PF3D7_1136800	PF3D7_1136800.1	N/A	216	S	Curated	Phosphorylation
PF3D7_0826900	PF3D7_0826900.1	N/A	235	S	Curated	Phosphorylation
PF3D7_0914000	PF3D7_0914000.1	N/A	215	S	Curated	Phosphorylation
PF3D7_1409900	PF3D7_1409900.1	CDS	60	S	Curated	Phosphorylation
PF3D7_1357400	PF3D7_1357400.1	N/A	622	S	Curated	Phosphorylation
PF3D7_1229100	PF3D7_1229100.1	MRP2	737	S	Curated	Phosphorylation
PF3D7_1466400	PF3D7_1466400.1	ApiAP2	468	S	Curated	Phosphorylation
PF3D7_0904900	PF3D7_0904900.1	CuTP	300	S	Curated	Phosphorylation
PF3D7_1110200	PF3D7_1110200.1	PRPF6	305	T	Curated	Phosphorylation
PF3D7_0813000	PF3D7_0813000.1	KIC7	589	S	Curated	Phosphorylation
PF3D7_1343300	PF3D7_1343300.1	N/A	260	S	Curated	Phosphorylation
PF3D7_1302500	PF3D7_1302500.1	N/A	899	S	Curated	Phosphorylation
PF3D7_1362800	PF3D7_1362800.1	N/A	1575	S	Curated	Phosphorylation
PF3D7_1304500	PF3D7_1304500.1	N/A	93	S	Curated	Phosphorylation
PF3D7_0802000	PF3D7_0802000.1	GDH3	771	S	Curated	Phosphorylation
PF3D7_0715900	PF3D7_0715900.1	CDF	534	Y	Curated	Phosphorylation
PF3D7_1021800	PF3D7_1021800.1	SEA1	1765	S	Curated	Phosphorylation
PF3D7_0103200	PF3D7_0103200.1	NT4	232	S	Curated	Phosphorylation
PF3D7_0613800	PF3D7_0613800.1	ApiAP2	2431	S	Curated	Phosphorylation
PF3D7_1130400	PF3D7_1130400.1	RPT5	30	S	Curated	Phosphorylation
PF3D7_1353200	PF3D7_1353200.1	MAHRP2	125	S	Curated	Phosphorylation
PF3D7_1310400	PF3D7_1310400.1	N/A	251	T	Curated	Phosphorylation
PF3D7_1249300	PF3D7_1249300.1	PPM4	376	S	Curated	Phosphorylation
PF3D7_1116100	PF3D7_1116100.1	N/A	430	S	Curated	Phosphorylation
PF3D7_1329500	PF3D7_1329500.1	N/A	1188	S	Curated	Phosphorylation
PF3D7_1356800	PF3D7_1356800.1	ARK3	3387	S	Curated	Phosphorylation
PF3D7_1308400	PF3D7_1308400.1	N/A	1236	S	Curated	Phosphorylation
PF3D7_0319000	PF3D7_0319000.1	ATPase7	1338	S	Curated	Phosphorylation
PF3D7_1133200	PF3D7_1133200.1	N/A	659	S	Curated	Phosphorylation
PF3D7_1110400	PF3D7_1110400.1	N/A	1422	S	Curated	Phosphorylation
PF3D7_0826100	PF3D7_0826100.1	HEUL	6998	S	Curated	Phosphorylation
PF3D7_1008100	PF3D7_1008100.1	PHD1	1031	S	Curated	Phosphorylation
PF3D7_0813900	PF3D7_0813900.1	RPS16	116	S	Curated	Phosphorylation
PF3D7_0413900	PF3D7_0413900.1	USP13	414	S	Curated	Phosphorylation
PF3D7_1366600	PF3D7_1366600.1	SRPR-alpha	255	S	Curated	Phosphorylation
PF3D7_1205900	PF3D7_1205900.1	N/A	405	S	Curated	Phosphorylation
PF3D7_1346300	PF3D7_1346300.1	ALBA2	98	S	Curated	Phosphorylation
PF3D7_0812400	PF3D7_0812400.1	KARalpha	71	T	Curated	Phosphorylation
PF3D7_0305500	PF3D7_0305500.1	N/A	406	S	Curated	Phosphorylation
PF3D7_1436600	PF3D7_1436600.1	PKG	695	T	Curated	Phosphorylation
PF3D7_0719700	PF3D7_0719700.1	RPS10	118	S	Curated	Phosphorylation
PF3D7_0705500	PF3D7_0705500.1	N/A	2646	S	Curated	Phosphorylation
PF3D7_0815800	PF3D7_0815800.1	VPS9	173	S	Curated	Phosphorylation
PF3D7_0825000	PF3D7_0825000.1	N/A	689	S	Curated	Phosphorylation
PF3D7_0922100	PF3D7_0922100.1	N/A	1188	S	Curated	Phosphorylation
PF3D7_0821800	PF3D7_0821800.1	SEC61B	35	S	Curated	Phosphorylation
PF3D7_1126700	PF3D7_1126700.1	ATG23	692	S	Curated	Phosphorylation
PF3D7_0919000	PF3D7_0919000.1	NAPS	13	T	Curated	Phosphorylation
PF3D7_0817500	PF3D7_0817500.1	HINT1	46	T	Curated	Phosphorylation
PF3D7_1202900	PF3D7_1202900.1	HMGB1	26	S	Curated	Phosphorylation
PF3D7_0717600	PF3D7_0717600.1	IMC32	439	S	Curated	Phosphorylation
PF3D7_0206000	PF3D7_0206000.1	RAD2	1094	S	Curated	Phosphorylation
PF3D7_1002900	PF3D7_1002900.1	N/A	19	S	Curated	Phosphorylation
PF3D7_0308300	PF3D7_0308300.1	PIC4	70	S	Curated	Phosphorylation
PF3D7_0927200	PF3D7_0927200.1	N/A	899	S	Curated	Phosphorylation
PF3D7_0219600	PF3D7_0219600.1	RFC1	190	S	Curated	Phosphorylation
PF3D7_1149000	PF3D7_1149000.1	Pf332	969	S	Curated	Phosphorylation
PF3D7_1473200	PF3D7_1473200.1	N/A	100	S	Curated	Phosphorylation
PF3D7_1470100	PF3D7_1470100.1	N/A	2161	S	Curated	Phosphorylation
PF3D7_1019100	PF3D7_1019100.1	N/A	886	T	Curated	Phosphorylation
PF3D7_1107300	PF3D7_1107300.1	PAIP1	2012	S	Curated	Phosphorylation
PF3D7_1468100	PF3D7_1468100.1	MORC	1362	T	Curated	Phosphorylation
PF3D7_0714200	PF3D7_0714200.1	N/A	442	T	Curated	Phosphorylation
PF3D7_0808100	PF3D7_0808100.1	N/A	938	S	Curated	Phosphorylation
PF3D7_1114900	PF3D7_1114900.1	N/A	354	S	Curated	Phosphorylation
PF3D7_0504000	PF3D7_0504000.1	ATPase3	1001	S	Curated	Phosphorylation
PF3D7_1105100	PF3D7_1105100.1	H2B	51	S	Curated	Phosphorylation
PF3D7_0529800	PF3D7_0529800.1	N/A	1875	S	Curated	Phosphorylation
PF3D7_1442400	PF3D7_1442400.1	KIC9	1889	S	Curated	Phosphorylation
PF3D7_1433400	PF3D7_1433400.1	PHD2	5279	S	Curated	Phosphorylation
PF3D7_0321600	PF3D7_0321600.1	DDX42	311	S	Curated	Phosphorylation
PF3D7_0726400	PF3D7_0726400.1	N/A	2154	S	Curated	Phosphorylation
PF3D7_1436200	PF3D7_1436200.1	BCP1	1003	S	Curated	Phosphorylation
PF3D7_1116100	PF3D7_1116100.1	N/A	356	S	Curated	Phosphorylation
PF3D7_1351000	PF3D7_1351000.1	N/A	828	S	Curated	Phosphorylation
PF3D7_1008100	PF3D7_1008100.1	PHD1	2701	S	Curated	Phosphorylation
PF3D7_0830500	PF3D7_0830500.1	TryThrA	160	S	Curated	Phosphorylation
PF3D7_1417700	PF3D7_1417700.1	N/A	125	S	Curated	Phosphorylation
PF3D7_1353300	PF3D7_1353300.1	N/A	1266	S	Curated	Phosphorylation
PF3D7_1441300	PF3D7_1441300.1	N/A	2194	T	Curated	Phosphorylation
PF3D7_1334100	PF3D7_1334100.1	N/A	288	S	Curated	Phosphorylation
PF3D7_1107300	PF3D7_1107300.1	PAIP1	1764	S	Curated	Phosphorylation
PF3D7_1212900	PF3D7_1212900.1	BDP2	916	S	Curated	Phosphorylation
PF3D7_0305500	PF3D7_0305500.1	N/A	3845	S	Curated	Phosphorylation
PF3D7_1228800	PF3D7_1228800.1	N/A	1442	S	Curated	Phosphorylation
PF3D7_1022400	PF3D7_1022400.1	SRSF4	392	S	Curated	Phosphorylation
PF3D7_1340600	PF3D7_1340600.1	DBR1	325	S	Curated	Phosphorylation
PF3D7_1208900	PF3D7_1208900.1	PPM11	133	S	Curated	Phosphorylation
PF3D7_1426100	PF3D7_1426100.1	BTF3	142	S	Curated	Phosphorylation
PF3D7_1426700	PF3D7_1426700.1	PEPC	1086	S	Curated	Phosphorylation
PF3D7_1205900	PF3D7_1205900.1	N/A	655	S	Curated	Phosphorylation
PF3D7_1465100	PF3D7_1465100.1	COG6	288	S	Curated	Phosphorylation
PF3D7_0307700	PF3D7_0307700.1	N/A	14	S	Curated	Phosphorylation
PF3D7_1364000	PF3D7_1364000.1	N/A	513	S	Curated	Phosphorylation
PF3D7_0623100	PF3D7_0623100.1	NAB2	262	S	Curated	Phosphorylation
PF3D7_1359900	PF3D7_1359900.1	N/A	1228	S	Curated	Phosphorylation
PF3D7_0513600	PF3D7_0513600.1	N/A	510	S	Curated	Phosphorylation
PF3D7_0932800	PF3D7_0932800.1	CSE1	736	S	Curated	Phosphorylation
PF3D7_1351700	PF3D7_1351700.1	IMC1f	542	S	Curated	Phosphorylation
PF3D7_1308200	PF3D7_1308200.1	cpsSII	1149	S	Curated	Phosphorylation
PF3D7_0103400	PF3D7_0103400.1	N/A	964	S	Curated	Phosphorylation
PF3D7_1352700	PF3D7_1352700.1	AQR	32	S	Curated	Phosphorylation
PF3D7_0823800	PF3D7_0823800.1	N/A	10	Y	Curated	Phosphorylation
PF3D7_1408200	PF3D7_1408200.1	AP2-G2	955	S	Curated	Phosphorylation
PF3D7_1461100	PF3D7_1461100.1	N/A	509	S	Curated	Phosphorylation
PF3D7_1455300	PF3D7_1455300.1	N/A	519	S	Curated	Phosphorylation
PF3D7_0905400	PF3D7_0905400.1	RhopH3	736	S	Curated	Phosphorylation
PF3D7_1425800	PF3D7_1425800.1	N/A	479	S	Curated	Phosphorylation
PF3D7_0824900	PF3D7_0824900.1	N/A	769	S	Curated	Phosphorylation
PF3D7_1003600	PF3D7_1003600.1	IMC1c	230	S	Curated	Phosphorylation
PF3D7_1136600	PF3D7_1136600.1	N/A	38	T	Curated	Phosphorylation
PF3D7_1008500	PF3D7_1008500.1	N/A	562	S	Curated	Phosphorylation
PF3D7_1358800	PF3D7_1358800.1	RPS15	48	S	Curated	Phosphorylation
PF3D7_1457900	PF3D7_1457900.1	N/A	2221	T	Curated	Phosphorylation
PF3D7_1360800	PF3D7_1360800.1	FLN	250	S	Curated	Phosphorylation
PF3D7_1149100	PF3D7_1149100.1	N/A	267	T	Curated	Phosphorylation
PF3D7_1357500	PF3D7_1357500.1	N/A	889	S	Curated	Phosphorylation
PF3D7_1016000	PF3D7_1016000.1	N/A	216	S	Curated	Phosphorylation
PF3D7_1140400	PF3D7_1140400.1	N/A	30	S	Curated	Phosphorylation
PF3D7_1017600	PF3D7_1017600.1	N/A	266	S	Curated	Phosphorylation
PF3D7_1027300	PF3D7_1027300.1	nPrx	330	S	Curated	Phosphorylation
PF3D7_1323700	PF3D7_1323700.1	GAPM1	259	T	Curated	Phosphorylation
PF3D7_0105200	PF3D7_0105200.1	N/A	567	S	Curated	Phosphorylation
PF3D7_1416200	PF3D7_1416200.1	MCA3	2277	S	Curated	Phosphorylation
PF3D7_0305500	PF3D7_0305500.1	N/A	3401	S	Curated	Phosphorylation
PF3D7_1247500	PF3D7_1247500.1	N/A	371	S	Curated	Phosphorylation
PF3D7_1030000	PF3D7_1030000.1	SPT4	30	S	Curated	Phosphorylation
PF3D7_0824400	PF3D7_0824400.1	NT2	341	S	Curated	Phosphorylation
PF3D7_1002100	PF3D7_1002100.1	PTP5	508	S	Curated	Phosphorylation
PF3D7_0305500	PF3D7_0305500.1	N/A	506	S	Curated	Phosphorylation
PF3D7_1138800	PF3D7_1138800.1	N/A	884	T	Curated	Phosphorylation
PF3D7_0106300	PF3D7_0106300.1	ATP6	489	S	Curated	Phosphorylation
PF3D7_1211300	PF3D7_1211300.1	MCM8	617	S	Curated	Phosphorylation
PF3D7_0422300	PF3D7_0422300.1	N/A	289	S	Curated	Phosphorylation
PF3D7_1308200	PF3D7_1308200.1	cpsSII	1695	S	Curated	Phosphorylation
PF3D7_1212900	PF3D7_1212900.1	BDP2	65	S	Curated	Phosphorylation
PF3D7_1339700	PF3D7_1339700.1	N/A	1323	S	Curated	Phosphorylation
PF3D7_1228800	PF3D7_1228800.1	N/A	1777	S	Curated	Phosphorylation
PF3D7_0214100	PF3D7_0214100.1	SEC31	1246	S	Curated	Phosphorylation
PF3D7_0613300	PF3D7_0613300.1	ROP14	487	S	Curated	Phosphorylation
PF3D7_1473700	PF3D7_1473700.1	NUP116	362	S	Curated	Phosphorylation
PF3D7_0826100	PF3D7_0826100.1	HEUL	2805	S	Curated	Phosphorylation
PF3D7_0710200	PF3D7_0710200.1	N/A	211	S	Curated	Phosphorylation
PF3D7_0922800	PF3D7_0922800.1	N/A	2476	S	Curated	Phosphorylation
PF3D7_1013200	PF3D7_1013200.1	N/A	115	S	Curated	Phosphorylation
PF3D7_0504800	PF3D7_0504800.1	N/A	4236	S	Curated	Phosphorylation
PF3D7_1308200	PF3D7_1308200.1	cpsSII	299	S	Curated	Phosphorylation
PF3D7_0317300	PF3D7_0317300.1	N/A	217	S	Curated	Phosphorylation
PF3D7_1138400	PF3D7_1138400.1	GCalpha	822	S	Curated	Phosphorylation
PF3D7_1472200	PF3D7_1472200.1	HDA1	933	S	Curated	Phosphorylation
PF3D7_1237500	PF3D7_1237500.1	N/A	1632	S	Curated	Phosphorylation
PF3D7_1421200	PF3D7_1421200.1	RPS25	19	S	Curated	Phosphorylation
PF3D7_1357100	PF3D7_1357100.1	N/A	385	S	Curated	Phosphorylation
PF3D7_0317700	PF3D7_0317700.1	N/A	589	S	Curated	Phosphorylation
PF3D7_0510100	PF3D7_0510100.1	N/A	1176	S	Curated	Phosphorylation
PF3D7_1459000	PF3D7_1459000.1	DBP5	298	S	Curated	Phosphorylation
PF3D7_0829000	PF3D7_0829000.1	N/A	125	S	Curated	Phosphorylation
PF3D7_1462400	PF3D7_1462400.1	N/A	1137	T	Curated	Phosphorylation
PF3D7_0918900	PF3D7_0918900.1	gammaGCS	312	S	Curated	Phosphorylation
PF3D7_1121100	PF3D7_1121100.1	N/A	123	S	Curated	Phosphorylation
PF3D7_1433400	PF3D7_1433400.1	PHD2	1644	S	Curated	Phosphorylation
PF3D7_1352800	PF3D7_1352800.1	MON1	46	T	Curated	Phosphorylation
PF3D7_0822900	PF3D7_0822900.1	PIC2	630	T	Curated	Phosphorylation
PF3D7_1350100	PF3D7_1350100.1	KRS1	143	S	Curated	Phosphorylation
PF3D7_1107300	PF3D7_1107300.1	PAIP1	1882	S	Curated	Phosphorylation
PF3D7_0935200	PF3D7_0935200.1	VPS33	508	S	Curated	Phosphorylation
PF3D7_1239800	PF3D7_1239800.1	N/A	3226	T	Curated	Phosphorylation
PF3D7_1205800	PF3D7_1205800.1	HMGB3	832	T	Curated	Phosphorylation
PF3D7_0316500	PF3D7_0316500.1	NUF2	6	S	Curated	Phosphorylation
PF3D7_1204300	PF3D7_1204300.1	EIF5A	7	Y	Curated	Phosphorylation
PF3D7_0729100	PF3D7_0729100.1	N/A	508	S	Curated	Phosphorylation
PF3D7_1426700	PF3D7_1426700.1	PEPC	1060	S	Curated	Phosphorylation
PF3D7_0717700	PF3D7_0717700.1	N/A	157	S	Curated	Phosphorylation
PF3D7_0532400	PF3D7_0532400.1	LyMP	310	S	Curated	Phosphorylation
PF3D7_0407800	PF3D7_0407800.1	CINCH	276	T	Curated	Phosphorylation
PF3D7_1223700	PF3D7_1223700.1	VIT	140	S	Curated	Phosphorylation
PF3D7_1136600	PF3D7_1136600.1	N/A	1104	T	Curated	Phosphorylation
PF3D7_1227300	PF3D7_1227300.1	N/A	202	S	Curated	Phosphorylation
PF3D7_1304200	PF3D7_1304200.1	MIT2	5	S	Curated	Phosphorylation
PF3D7_0403600	PF3D7_0403600.1	N/A	702	S	Curated	Phosphorylation
PF3D7_1423300	PF3D7_1423300.1	PP7	149	S	Curated	Phosphorylation
PF3D7_0311300	PF3D7_0311300.1	N/A	776	S	Curated	Phosphorylation
PF3D7_1241500	PF3D7_1241500.1	N/A	221	S	Curated	Phosphorylation
PF3D7_1239000	PF3D7_1239000.1	N/A	68	S	Curated	Phosphorylation
PF3D7_1142100	PF3D7_1142100.1	N/A	2170	S	Curated	Phosphorylation
PF3D7_0815800	PF3D7_0815800.1	VPS9	1283	Y	Curated	Phosphorylation
PF3D7_1011400	PF3D7_1011400.1	N/A	49	T	Curated	Phosphorylation
PF3D7_1107300	PF3D7_1107300.1	PAIP1	3073	S	Curated	Phosphorylation
PF3D7_0509800	PF3D7_0509800.1	PI4KB	575	S	Curated	Phosphorylation
PF3D7_0606500	PF3D7_0606500.1	PTB	7	S	Curated	Phosphorylation
PF3D7_0309000	PF3D7_0309000.1	YVH1	237	S	Curated	Phosphorylation
PF3D7_0730500	PF3D7_0730500.1	N/A	2178	S	Curated	Phosphorylation
PF3D7_1451200	PF3D7_1451200.1	N/A	1353	S	Curated	Phosphorylation
PF3D7_1014600	PF3D7_1014600.1	ADA2	2492	S	Curated	Phosphorylation
PF3D7_0802600	PF3D7_0802600.1	ACbeta	911	S	Curated	Phosphorylation
PF3D7_0932800	PF3D7_0932800.1	CSE1	497	T	Curated	Phosphorylation
PF3D7_1442900	PF3D7_1442900.1	ARFGEF	987	S	Curated	Phosphorylation
PF3D7_1237900	PF3D7_1237900.1	N/A	378	S	Curated	Phosphorylation
PF3D7_0822900	PF3D7_0822900.1	PIC2	823	S	Curated	Phosphorylation
PF3D7_1237500	PF3D7_1237500.1	N/A	661	S	Curated	Phosphorylation
PF3D7_1027700	PF3D7_1027700.1	CEN3	6	S	Curated	Phosphorylation
PF3D7_1437200	PF3D7_1437200.1	N/A	22	S	Curated	Phosphorylation
PF3D7_1302500	PF3D7_1302500.1	N/A	2722	S	Curated	Phosphorylation
PF3D7_1308900	PF3D7_1308900.1	DCP2	882	S	Curated	Phosphorylation
PF3D7_1003000	PF3D7_1003000.1	N/A	361	S	Curated	Phosphorylation
PF3D7_1002100	PF3D7_1002100.1	PTP5	165	S	Curated	Phosphorylation
PF3D7_1420100	PF3D7_1420100.1	N/A	101	T	Curated	Phosphorylation
PF3D7_0212400	PF3D7_0212400.1	N/A	2619	S	Curated	Phosphorylation
PF3D7_1250200	PF3D7_1250200.1	N/A	68	S	Curated	Phosphorylation
PF3D7_0522400	PF3D7_0522400.1	N/A	1228	S	Curated	Phosphorylation
PF3D7_0808100	PF3D7_0808100.1	N/A	140	S	Curated	Phosphorylation
PF3D7_0705300	PF3D7_0705300.1	ORC2	460	S	Curated	Phosphorylation
PF3D7_0807600	PF3D7_0807600.1	N/A	1333	S	Curated	Phosphorylation
PF3D7_1437400	PF3D7_1437400.1	PANK2	516	S	Curated	Phosphorylation
PF3D7_0924400	PF3D7_0924400.1	N/A	642	S	Curated	Phosphorylation
PF3D7_0203600	PF3D7_0203600.1	N/A	223	S	Curated	Phosphorylation
PF3D7_0407800	PF3D7_0407800.1	CINCH	1563	T	Curated	Phosphorylation
PF3D7_1030200	PF3D7_1030200.1	CLAMP	283	S	Curated	Phosphorylation
PF3D7_0110700	PF3D7_0110700.1	CAF1C	23	S	Curated	Phosphorylation
PF3D7_0927200	PF3D7_0927200.1	N/A	636	S	Curated	Phosphorylation
PF3D7_1019500	PF3D7_1019500.1	N/A	1239	S	Curated	Phosphorylation
PF3D7_1460500	PF3D7_1460500.1	N/A	17	S	Curated	Phosphorylation
PF3D7_1464500	PF3D7_1464500.1	N/A	1887	T	Curated	Phosphorylation
PF3D7_0623800	PF3D7_0623800.1	TKL4	873	S	Curated	Phosphorylation
PF3D7_0715900	PF3D7_0715900.1	CDF	536	S	Curated	Phosphorylation
PF3D7_0808300	PF3D7_0808300.1	N/A	37	S	Curated	Phosphorylation
PF3D7_0807600	PF3D7_0807600.1	N/A	1323	T	Curated	Phosphorylation
PF3D7_0704800	PF3D7_0704800.1	PPM12	545	S	Curated	Phosphorylation
PF3D7_1244600	PF3D7_1244600.1	ARFGAP1	256	S	Curated	Phosphorylation
PF3D7_0723800	PF3D7_0723800.1	N/A	531	S	Curated	Phosphorylation
PF3D7_0407800	PF3D7_0407800.1	CINCH	1853	S	Curated	Phosphorylation
PF3D7_0910200	PF3D7_0910200.1	N/A	2362	S	Curated	Phosphorylation
PF3D7_1339700	PF3D7_1339700.1	N/A	1369	S	Curated	Phosphorylation
PF3D7_0208100	PF3D7_0208100.1	N/A	1319	S	Curated	Phosphorylation
PF3D7_1220300	PF3D7_1220300.1	N/A	745	T	Curated	Phosphorylation
PF3D7_1225700	PF3D7_1225700.1	N/A	786	S	Curated	Phosphorylation
PF3D7_1022400	PF3D7_1022400.1	SRSF4	537	S	Curated	Phosphorylation
PF3D7_0905900	PF3D7_0905900.1	SEC27	983	S	Curated	Phosphorylation
PF3D7_1311800	PF3D7_1311800.1	M1AAP	793	S	Curated	Phosphorylation
PF3D7_1032700	PF3D7_1032700.1	N/A	537	S	Curated	Phosphorylation
PF3D7_1362800	PF3D7_1362800.1	N/A	542	S	Curated	Phosphorylation
PF3D7_1473200	PF3D7_1473200.1	N/A	212	T	Curated	Phosphorylation
PF3D7_0508900	PF3D7_0508900.1	AAP6	2	S	Curated	Phosphorylation
PF3D7_1037500	PF3D7_1037500.1	DYN2	548	S	Curated	Phosphorylation
PF3D7_0209800	PF3D7_0209800.1	UAP56	79	S	Curated	Phosphorylation
PF3D7_0407800	PF3D7_0407800.1	CINCH	1850	S	Curated	Phosphorylation
PF3D7_0417400	PF3D7_0417400.1	N/A	1825	S	Curated	Phosphorylation
PF3D7_1225700	PF3D7_1225700.1	N/A	779	S	Curated	Phosphorylation
PF3D7_1149000	PF3D7_1149000.1	Pf332	1471	S	Curated	Phosphorylation
PF3D7_0521000	PF3D7_0521000.1	N/A	483	S	Curated	Phosphorylation
PF3D7_0614300	PF3D7_0614300.1	MFR1	12	S	Curated	Phosphorylation
PF3D7_1437300	PF3D7_1437300.1	N/A	203	T	Curated	Phosphorylation
PF3D7_1336400	PF3D7_1336400.1	N/A	279	Y	Curated	Phosphorylation
PF3D7_0611600	PF3D7_0611600.1	BTP1	421	S	Curated	Phosphorylation
PF3D7_0616200	PF3D7_0616200.1	NDC80	40	S	Curated	Phosphorylation
PF3D7_1342900	PF3D7_1342900.1	AP2-HS	772	S	Curated	Phosphorylation
PF3D7_0302900	PF3D7_0302900.1	N/A	419	S	Curated	Phosphorylation
PF3D7_1205900	PF3D7_1205900.1	N/A	34	S	Curated	Phosphorylation
PF3D7_0503200	PF3D7_0503200.1	CDC6	723	T	Curated	Phosphorylation
PF3D7_1465200	PF3D7_1465200.1	MED4	316	S	Curated	Phosphorylation
PF3D7_0307200	PF3D7_0307200.1	N/A	19	S	Curated	Phosphorylation
PF3D7_0529400	PF3D7_0529400.1	N/A	1061	S	Curated	Phosphorylation
PF3D7_1236000	PF3D7_1236000.1	N/A	104	S	Curated	Phosphorylation
PF3D7_1039000	PF3D7_1039000.1	FIKK10.2	354	S	Curated	Phosphorylation
PF3D7_0705500	PF3D7_0705500.1	N/A	2246	S	Curated	Phosphorylation
PF3D7_0825000	PF3D7_0825000.1	N/A	1438	S	Curated	Phosphorylation
PF3D7_0705400	PF3D7_0705400.1	MCM7	15	S	Curated	Phosphorylation
PF3D7_0504800	PF3D7_0504800.1	N/A	250	S	Curated	Phosphorylation
PF3D7_0528400	PF3D7_0528400.1	DHHC7	59	S	Curated	Phosphorylation
PF3D7_1218500	PF3D7_1218500.1	DRPC	18	S	Curated	Phosphorylation
PF3D7_0614300	PF3D7_0614300.1	MFR1	285	S	Curated	Phosphorylation
PF3D7_1021900	PF3D7_1021900.1	N/A	1274	S	Curated	Phosphorylation
PF3D7_1464500	PF3D7_1464500.1	N/A	2863	S	Curated	Phosphorylation
PF3D7_0105700	PF3D7_0105700.1	N/A	2313	S	Curated	Phosphorylation
PF3D7_1401200	PF3D7_1401200.1	N/A	59	S	Curated	Phosphorylation
PF3D7_0407800	PF3D7_0407800.1	CINCH	452	S	Curated	Phosphorylation
PF3D7_1141300	PF3D7_1141300.1	APR1	312	S	Curated	Phosphorylation
PF3D7_0628300	PF3D7_0628300.1	CEPT	17	S	Curated	Phosphorylation
PF3D7_0420300	PF3D7_0420300.1	ApiAP2	1400	Y	Curated	Phosphorylation
PF3D7_1207000	PF3D7_1207000.1	N/A	2584	S	Curated	Phosphorylation
PF3D7_1346400	PF3D7_1346400.1	N/A	2242	S	Curated	Phosphorylation
PF3D7_0603400	PF3D7_0603400.1	TEX1	340	S	Curated	Phosphorylation
PF3D7_0906600	PF3D7_0906600.1	N/A	744	S	Curated	Phosphorylation
PF3D7_0824400	PF3D7_0824400.1	NT2	318	S	Curated	Phosphorylation
PF3D7_1453700	PF3D7_1453700.1	P23	253	S	Curated	Phosphorylation
PF3D7_1415400	PF3D7_1415400.1	N/A	616	T	Curated	Phosphorylation
PF3D7_0921900	PF3D7_0921900.1	N/A	21	S	Curated	Phosphorylation
PF3D7_0418600	PF3D7_0418600.1	N/A	1566	S	Curated	Phosphorylation
PF3D7_1346400	PF3D7_1346400.1	N/A	5167	S	Curated	Phosphorylation
PF3D7_0629700	PF3D7_0629700.1	SET1	4048	S	Curated	Phosphorylation
PF3D7_1014900	PF3D7_1014900.1	KIC8	100	S	Curated	Phosphorylation
PF3D7_1030200	PF3D7_1030200.1	CLAMP	419	S	Curated	Phosphorylation
PF3D7_1340900	PF3D7_1340900.1	PiT	359	T	Curated	Phosphorylation
PF3D7_1218500	PF3D7_1218500.1	DRPC	535	S	Curated	Phosphorylation
PF3D7_0319100	PF3D7_0319100.1	RBX1	106	T	Curated	Phosphorylation
PF3D7_0906600	PF3D7_0906600.1	N/A	81	S	Curated	Phosphorylation
PF3D7_0501400	PF3D7_0501400.1	FIRA	1318	S	Curated	Phosphorylation
PF3D7_0824400	PF3D7_0824400.1	NT2	326	S	Curated	Phosphorylation
PF3D7_1235300	PF3D7_1235300.1	NOT4	73	S	Curated	Phosphorylation
PF3D7_0927200	PF3D7_0927200.1	N/A	1491	S	Curated	Phosphorylation
PF3D7_1015900	PF3D7_1015900.1	ENO	101	S	Curated	Phosphorylation
PF3D7_1202600	PF3D7_1202600.1	NEMF	1209	S	Curated	Phosphorylation
PF3D7_1357100	PF3D7_1357100.1	N/A	273	S	Curated	Phosphorylation
PF3D7_1422300	PF3D7_1422300.1	N/A	119	S	Curated	Phosphorylation
PF3D7_1318700	PF3D7_1318700.1	AAP4	380	S	Curated	Phosphorylation
PF3D7_1105100	PF3D7_1105100.1	H2B	14	T	Curated	Phosphorylation
PF3D7_0907300	PF3D7_0907300.1	N/A	170	S	Curated	Phosphorylation
PF3D7_0507800	PF3D7_0507800.1	N/A	651	S	Curated	Phosphorylation
PF3D7_1234100	PF3D7_1234100.1	BDP5	1026	S	Curated	Phosphorylation
PF3D7_1466100	PF3D7_1466100.1	PPKL	461	S	Curated	Phosphorylation
PF3D7_1110400	PF3D7_1110400.1	N/A	469	T	Curated	Phosphorylation
PF3D7_1344100	PF3D7_1344100.1	N/A	256	T	Curated	Phosphorylation
PF3D7_1358900	PF3D7_1358900.1	N/A	39	S	Curated	Phosphorylation
PF3D7_1027700	PF3D7_1027700.1	CEN3	22	S	Curated	Phosphorylation
PF3D7_1322200	PF3D7_1322200.1	N/A	3294	S	Curated	Phosphorylation
PF3D7_0202100	PF3D7_0202100.1	LSAP2	96	S	Curated	Phosphorylation
PF3D7_1025900	PF3D7_1025900.1	N/A	567	S	Curated	Phosphorylation
PF3D7_0515400	PF3D7_0515400.1	N/A	67	S	Curated	Phosphorylation
PF3D7_1453200	PF3D7_1453200.1	N/A	501	S	Curated	Phosphorylation
PF3D7_1023000	PF3D7_1023000.1	N/A	183	S	Curated	Phosphorylation
PF3D7_0820900	PF3D7_0820900.1	N/A	379	Y	Curated	Phosphorylation
PF3D7_0209100	PF3D7_0209100.1	PATPL1	40	T	Curated	Phosphorylation
PF3D7_1014900	PF3D7_1014900.1	KIC8	73	S	Curated	Phosphorylation
PF3D7_0731600	PF3D7_0731600.1	ACS5	44	S	Curated	Phosphorylation
PF3D7_1468100	PF3D7_1468100.1	MORC	2205	Y	Curated	Phosphorylation
PF3D7_0604500	PF3D7_0604500.1	N/A	232	S	Curated	Phosphorylation
PF3D7_1457900	PF3D7_1457900.1	N/A	2653	S	Curated	Phosphorylation
PF3D7_1007000	PF3D7_1007000.1	TMEM147	239	S	Curated	Phosphorylation
PF3D7_0105700	PF3D7_0105700.1	N/A	20	S	Curated	Phosphorylation
PF3D7_1227700	PF3D7_1227700.1	KIC2	106	S	Curated	Phosphorylation
PF3D7_1474900	PF3D7_1474900.1	CITH	244	S	Curated	Phosphorylation
PF3D7_1437500	PF3D7_1437500.1	N/A	61	S	Curated	Phosphorylation
PF3D7_1455300	PF3D7_1455300.1	N/A	607	S	Curated	Phosphorylation
PF3D7_0407800	PF3D7_0407800.1	CINCH	1792	S	Curated	Phosphorylation
PF3D7_1308000	PF3D7_1308000.1	N/A	63	S	Curated	Phosphorylation
PF3D7_1221000	PF3D7_1221000.1	SET10	1981	S	Curated	Phosphorylation
PF3D7_0505100	PF3D7_0505100.1	TRS85	1387	S	Curated	Phosphorylation
PF3D7_1440000	PF3D7_1440000.1	N/A	1875	S	Curated	Phosphorylation
PF3D7_1302000	PF3D7_1302000.1	PTP6	219	S	Curated	Phosphorylation
PF3D7_0704800	PF3D7_0704800.1	PPM12	1004	S	Curated	Phosphorylation
PF3D7_0923400	PF3D7_0923400.1	N/A	899	S	Curated	Phosphorylation
PF3D7_0403600	PF3D7_0403600.1	N/A	697	Y	Curated	Phosphorylation
PF3D7_0218500	PF3D7_0218500.1	SNRPD2	3	S	Curated	Phosphorylation
PF3D7_1220300	PF3D7_1220300.1	N/A	348	S	Curated	Phosphorylation
PF3D7_1359900	PF3D7_1359900.1	N/A	1472	S	Curated	Phosphorylation
PF3D7_1119300	PF3D7_1119300.1	U2AF1	252	S	Curated	Phosphorylation
PF3D7_1448300	PF3D7_1448300.1	N/A	509	S	Curated	Phosphorylation
PF3D7_1206700	PF3D7_1206700.1	EIF5	533	S	Curated	Phosphorylation
PF3D7_1138000	PF3D7_1138000.1	N/A	2539	S	Curated	Phosphorylation
PF3D7_1307700	PF3D7_1307700.1	N/A	790	S	Curated	Phosphorylation
PF3D7_0702500	PF3D7_0702500.1	N/A	222	S	Curated	Phosphorylation
PF3D7_0629600	PF3D7_0629600.1	N/A	230	S	Curated	Phosphorylation
PF3D7_0933200	PF3D7_0933200.1	N/A	152	S	Curated	Phosphorylation
PF3D7_0730500	PF3D7_0730500.1	N/A	957	T	Curated	Phosphorylation
PF3D7_0215400	PF3D7_0215400.1	N/A	294	S	Curated	Phosphorylation
PF3D7_0523000	PF3D7_0523000.1	MDR1	1204	S	Curated	Phosphorylation
PF3D7_1303500	PF3D7_1303500.1	NHE	1147	S	Curated	Phosphorylation
PF3D7_0623100	PF3D7_0623100.1	NAB2	330	S	Curated	Phosphorylation
PF3D7_1312800	PF3D7_1312800.1	AAP2	136	Y	Curated	Phosphorylation
PF3D7_1018200	PF3D7_1018200.1	PPP8	2071	S	Curated	Phosphorylation
PF3D7_1021800	PF3D7_1021800.1	SEA1	939	S	Curated	Phosphorylation
PF3D7_0730500	PF3D7_0730500.1	N/A	289	S	Curated	Phosphorylation
PF3D7_0730500	PF3D7_0730500.1	N/A	1066	S	Curated	Phosphorylation
PF3D7_1129300	PF3D7_1129300.1	N/A	1079	S	Curated	Phosphorylation
PF3D7_1474900	PF3D7_1474900.1	CITH	228	T	Curated	Phosphorylation
PF3D7_0409600	PF3D7_0409600.1	RPA1	304	T	Curated	Phosphorylation
PF3D7_0920000	PF3D7_0920000.1	ELO3	390	S	Curated	Phosphorylation
PF3D7_1003000	PF3D7_1003000.1	N/A	785	S	Curated	Phosphorylation
PF3D7_1019000	PF3D7_1019000.1	N/A	717	S	Curated	Phosphorylation
PF3D7_0401800	PF3D7_0401800.1	PfD80	292	S	Curated	Phosphorylation
PF3D7_0728600	PF3D7_0728600.1	N/A	1356	T	Curated	Phosphorylation
PF3D7_1011800	PF3D7_1011800.1	PREBP	9	S	Curated	Phosphorylation
PF3D7_0207100	PF3D7_0207100.1	N/A	1677	S	Curated	Phosphorylation
PF3D7_0610200	PF3D7_0610200.1	RBM25	695	S	Curated	Phosphorylation
PF3D7_0610200	PF3D7_0610200.1	RBM25	624	S	Curated	Phosphorylation
PF3D7_1138400	PF3D7_1138400.1	GCalpha	2653	S	Curated	Phosphorylation
PF3D7_1312800	PF3D7_1312800.1	AAP2	665	T	Curated	Phosphorylation
PF3D7_1467600	PF3D7_1467600.1	N/A	1507	S	Curated	Phosphorylation
PF3D7_1345600	PF3D7_1345600.1	N/A	155	S	Curated	Phosphorylation
PF3D7_0204300	PF3D7_0204300.1	N/A	38	T	Curated	Phosphorylation
PF3D7_0504000	PF3D7_0504000.1	ATPase3	1218	T	Curated	Phosphorylation
PF3D7_1409800	PF3D7_1409800.1	CELF2	40	Y	Curated	Phosphorylation
PF3D7_0704400	PF3D7_0704400.1	N/A	818	S	Curated	Phosphorylation
PF3D7_1473700	PF3D7_1473700.1	NUP116	308	S	Curated	Phosphorylation
PF3D7_1004300	PF3D7_1004300.1	N/A	910	S	Curated	Phosphorylation
PF3D7_1023900	PF3D7_1023900.1	CHD1	2380	T	Curated	Phosphorylation
PF3D7_0106700	PF3D7_0106700.1	AARP2	555	S	Curated	Phosphorylation
PF3D7_0903200	PF3D7_0903200.1	RAB7	72	S	Curated	Phosphorylation
PF3D7_0731300	PF3D7_0731300.1	PfG174	79	S	Curated	Phosphorylation
PF3D7_0924000	PF3D7_0924000.1	N/A	791	S	Curated	Phosphorylation
PF3D7_0820000	PF3D7_0820000.1	SRCAP	461	S	Curated	Phosphorylation
PF3D7_0403800	PF3D7_0403800.1	N/A	574	Y	Curated	Phosphorylation
PF3D7_1451800	PF3D7_1451800.1	SORTLR	859	S	Curated	Phosphorylation
PF3D7_0611600	PF3D7_0611600.1	BTP1	412	T	Curated	Phosphorylation
PF3D7_0822900	PF3D7_0822900.1	PIC2	924	S	Curated	Phosphorylation
PF3D7_1362700	PF3D7_1362700.1	N/A	273	S	Curated	Phosphorylation
PF3D7_1104100	PF3D7_1104100.1	SYN13	245	S	Curated	Phosphorylation
PF3D7_1107800	PF3D7_1107800.1	ApiAP2	268	S	Curated	Phosphorylation
PF3D7_1305000	PF3D7_1305000.1	N/A	1415	S	Curated	Phosphorylation
PF3D7_1239200	PF3D7_1239200.1	ApiAP2	114	S	Curated	Phosphorylation
PF3D7_1122500	PF3D7_1122500.1	KIC10	91	S	Curated	Phosphorylation
PF3D7_0409600	PF3D7_0409600.1	RPA1	393	S	Curated	Phosphorylation
PF3D7_0210600	PF3D7_0210600.1	CERLI1	393	S	Curated	Phosphorylation
PF3D7_0715200	PF3D7_0715200.1	N/A	1704	S	Curated	Phosphorylation
PF3D7_0919900	PF3D7_0919900.1	RCC-PIP	3362	S	Curated	Phosphorylation
PF3D7_0612200	PF3D7_0612200.1	LRR6	601	S	Curated	Phosphorylation
PF3D7_1446500	PF3D7_1446500.1	NUP313	2504	S	Curated	Phosphorylation
PF3D7_0924600	PF3D7_0924600.1	N/A	269	S	Curated	Phosphorylation
PF3D7_1239200	PF3D7_1239200.1	ApiAP2	1980	S	Curated	Phosphorylation
PF3D7_0504800	PF3D7_0504800.1	N/A	2186	S	Curated	Phosphorylation
PF3D7_0532300	PF3D7_0532300.1	N/A	360	T	Curated	Phosphorylation
PF3D7_0927600	PF3D7_0927600.1	N/A	12	S	Curated	Phosphorylation
PF3D7_1359600	PF3D7_1359600.1	N/A	1467	S	Curated	Phosphorylation
PF3D7_1301700	PF3D7_1301700.1	CBP2	243	S	Curated	Phosphorylation
PF3D7_1242600	PF3D7_1242600.1	N/A	145	S	Curated	Phosphorylation
PF3D7_1027800	PF3D7_1027800.1	RPL3	290	S	Curated	Phosphorylation
PF3D7_0815800	PF3D7_0815800.1	VPS9	625	S	Curated	Phosphorylation
PF3D7_0825000	PF3D7_0825000.1	N/A	121	S	Curated	Phosphorylation
PF3D7_0803200	PF3D7_0803200.1	N/A	285	S	Curated	Phosphorylation
PF3D7_0415300	PF3D7_0415300.1	CRK3	778	T	Curated	Phosphorylation
PF3D7_0804900	PF3D7_0804900.1	N/A	435	S	Curated	Phosphorylation
PF3D7_0914400	PF3D7_0914400.1	KIC3	148	S	Curated	Phosphorylation
PF3D7_0614300	PF3D7_0614300.1	MFR1	2	S	Curated	Phosphorylation
PF3D7_0505500	PF3D7_0505500.1	MSH6	113	S	Curated	Phosphorylation
PF3D7_1139300	PF3D7_1139300.1	AP2-G5	1780	S	Curated	Phosphorylation
PF3D7_1014900	PF3D7_1014900.1	KIC8	1428	S	Curated	Phosphorylation
PF3D7_1138400	PF3D7_1138400.1	GCalpha	802	S	Curated	Phosphorylation
PF3D7_1127800	PF3D7_1127800.1	N/A	969	S	Curated	Phosphorylation
PF3D7_0613800	PF3D7_0613800.1	ApiAP2	1228	S	Curated	Phosphorylation
PF3D7_1018200	PF3D7_1018200.1	PPP8	2086	S	Curated	Phosphorylation
PF3D7_1353800	PF3D7_1353800.1	N/A	7	S	Curated	Phosphorylation
PF3D7_1321500	PF3D7_1321500.1	PDEbeta	32	T	Curated	Phosphorylation
PF3D7_0309000	PF3D7_0309000.1	YVH1	235	S	Curated	Phosphorylation
PF3D7_1239800	PF3D7_1239800.1	N/A	3493	S	Curated	Phosphorylation
PF3D7_0812400	PF3D7_0812400.1	KARalpha	80	S	Curated	Phosphorylation
PF3D7_1351700	PF3D7_1351700.1	IMC1f	1218	S	Curated	Phosphorylation
PF3D7_0611400	PF3D7_0611400.1	SWIB	704	S	Curated	Phosphorylation
PF3D7_0618000	PF3D7_0618000.1	N/A	444	S	Curated	Phosphorylation
PF3D7_0728800	PF3D7_0728800.1	N/A	227	S	Curated	Phosphorylation
PF3D7_1419600	PF3D7_1419600.1	N/A	378	S	Curated	Phosphorylation
PF3D7_1311900	PF3D7_1311900.1	vapA	378	S	Curated	Phosphorylation
PF3D7_1460500	PF3D7_1460500.1	N/A	1551	S	Curated	Phosphorylation
PF3D7_0617200	PF3D7_0617200.1	N/A	68	S	Curated	Phosphorylation
PF3D7_0606000	PF3D7_0606000.1	KIC1	550	S	Curated	Phosphorylation
PF3D7_1305300	PF3D7_1305300.1	GCN1	665	S	Curated	Phosphorylation
PF3D7_1107300	PF3D7_1107300.1	PAIP1	1947	T	Curated	Phosphorylation
PF3D7_1365800	PF3D7_1365800.1	N/A	303	S	Curated	Phosphorylation
PF3D7_0704100	PF3D7_0704100.1	BTP2	787	S	Curated	Phosphorylation
PF3D7_1456500	PF3D7_1456500.1	N/A	2097	S	Curated	Phosphorylation
PF3D7_1107300	PF3D7_1107300.1	PAIP1	1204	Y	Curated	Phosphorylation
PF3D7_1248700	PF3D7_1248700.1	N/A	350	S	Curated	Phosphorylation
PF3D7_0912500	PF3D7_0912500.1	N/A	139	T	Curated	Phosphorylation
PF3D7_0613800	PF3D7_0613800.1	ApiAP2	2919	S	Curated	Phosphorylation
PF3D7_0626800	PF3D7_0626800.1	PyrK	9	S	Curated	Phosphorylation
PF3D7_0217600	PF3D7_0217600.1	N/A	1629	S	Curated	Phosphorylation
PF3D7_1023900	PF3D7_1023900.1	CHD1	139	S	Curated	Phosphorylation
PF3D7_0630300	PF3D7_0630300.1	N/A	1537	S	Curated	Phosphorylation
PF3D7_1241200	PF3D7_1241200.1	N/A	1366	S	Curated	Phosphorylation
PF3D7_1353300	PF3D7_1353300.1	N/A	1736	S	Curated	Phosphorylation
PF3D7_1026000	PF3D7_1026000.1	N/A	218	S	Curated	Phosphorylation
PF3D7_1208900	PF3D7_1208900.1	PPM11	1381	S	Curated	Phosphorylation
PF3D7_0511500	PF3D7_0511500.1	N/A	6838	T	Curated	Phosphorylation
PF3D7_1433400	PF3D7_1433400.1	PHD2	5601	S	Curated	Phosphorylation
PF3D7_0812500	PF3D7_0812500.1	N/A	851	S	Curated	Phosphorylation
PF3D7_1022400	PF3D7_1022400.1	SRSF4	345	S	Curated	Phosphorylation
PF3D7_0730500	PF3D7_0730500.1	N/A	2365	S	Curated	Phosphorylation
PF3D7_0219600	PF3D7_0219600.1	RFC1	175	S	Curated	Phosphorylation
PF3D7_1468100	PF3D7_1468100.1	MORC	38	S	Curated	Phosphorylation
PF3D7_0614300	PF3D7_0614300.1	MFR1	467	S	Curated	Phosphorylation
PF3D7_0508100	PF3D7_0508100.1	SET9	1164	S	Curated	Phosphorylation
PF3D7_0818000	PF3D7_0818000.1	SNRNP27	369	S	Curated	Phosphorylation
PF3D7_1445400	PF3D7_1445400.1	CLK1	45	S	Curated	Phosphorylation
PF3D7_0506900	PF3D7_0506900.1	ROM4	291	S	Curated	Phosphorylation
PF3D7_1249300	PF3D7_1249300.1	PPM4	902	S	Curated	Phosphorylation
PF3D7_1326700	PF3D7_1326700.1	N/A	191	S	Curated	Phosphorylation
PF3D7_1201000	PF3D7_1201000.1	N/A	403	S	Curated	Phosphorylation
PF3D7_0504800	PF3D7_0504800.1	N/A	951	S	Curated	Phosphorylation
PF3D7_0911400	PF3D7_0911400.1	N/A	569	S	Curated	Phosphorylation
PF3D7_0804000	PF3D7_0804000.1	N/A	558	S	Curated	Phosphorylation
PF3D7_1237900	PF3D7_1237900.1	N/A	704	S	Curated	Phosphorylation
PF3D7_1239800	PF3D7_1239800.1	N/A	3231	S	Curated	Phosphorylation
PF3D7_0420000	PF3D7_0420000.1	N/A	2794	S	Curated	Phosphorylation
PF3D7_1343800	PF3D7_1343800.1	N/A	5754	S	Curated	Phosphorylation
PF3D7_1021800	PF3D7_1021800.1	SEA1	228	S	Curated	Phosphorylation
PF3D7_0716000	PF3D7_0716000.1	N/A	487	S	Curated	Phosphorylation
PF3D7_1344900	PF3D7_1344900.1	N/A	1168	S	Curated	Phosphorylation
PF3D7_1410400	PF3D7_1410400.1	RAP1	201	T	Curated	Phosphorylation
PF3D7_1307900	PF3D7_1307900.1	N/A	223	S	Curated	Phosphorylation
PF3D7_0623100	PF3D7_0623100.1	NAB2	269	S	Curated	Phosphorylation
PF3D7_1233600	PF3D7_1233600.1	AARP1	2052	S	Curated	Phosphorylation
PF3D7_1346500	PF3D7_1346500.1	N/A	240	S	Curated	Phosphorylation
PF3D7_0525500	PF3D7_0525500.1	N/A	1055	S	Curated	Phosphorylation
PF3D7_0824900	PF3D7_0824900.1	N/A	820	S	Curated	Phosphorylation
PF3D7_1224000	PF3D7_1224000.1	GCH1	384	S	Curated	Phosphorylation
PF3D7_1308000	PF3D7_1308000.1	N/A	183	S	Curated	Phosphorylation
PF3D7_0919900	PF3D7_0919900.1	RCC-PIP	837	S	Curated	Phosphorylation
PF3D7_1312800	PF3D7_1312800.1	AAP2	1340	S	Curated	Phosphorylation
PF3D7_0907300	PF3D7_0907300.1	N/A	190	S	Curated	Phosphorylation
PF3D7_1239200	PF3D7_1239200.1	ApiAP2	1624	S	Curated	Phosphorylation
PF3D7_0903500	PF3D7_0903500.1	NUP138	951	S	Curated	Phosphorylation
PF3D7_1023900	PF3D7_1023900.1	CHD1	33	T	Curated	Phosphorylation
PF3D7_0729100	PF3D7_0729100.1	N/A	2215	S	Curated	Phosphorylation
PF3D7_1433500	PF3D7_1433500.1	TOP2	1296	S	Curated	Phosphorylation
PF3D7_0517700	PF3D7_0517700.1	EIF3B	19	S	Curated	Phosphorylation
PF3D7_0407800	PF3D7_0407800.1	CINCH	1673	S	Curated	Phosphorylation
PF3D7_1031400	PF3D7_1031400.1	OTU	806	S	Curated	Phosphorylation
PF3D7_1312800	PF3D7_1312800.1	AAP2	1824	S	Curated	Phosphorylation
PF3D7_0826100	PF3D7_0826100.1	HEUL	4675	S	Curated	Phosphorylation
PF3D7_1235300	PF3D7_1235300.1	NOT4	659	S	Curated	Phosphorylation
PF3D7_0615400	PF3D7_0615400.1	N/A	1133	S	Curated	Phosphorylation
PF3D7_1139300	PF3D7_1139300.1	AP2-G5	1975	Y	Curated	Phosphorylation
PF3D7_0529400	PF3D7_0529400.1	N/A	1102	T	Curated	Phosphorylation
PF3D7_1345400	PF3D7_1345400.1	N/A	59	T	Curated	Phosphorylation
PF3D7_0605100	PF3D7_0605100.1	KH1	474	S	Curated	Phosphorylation
PF3D7_1474900	PF3D7_1474900.1	CITH	59	S	Curated	Phosphorylation
PF3D7_0704100	PF3D7_0704100.1	BTP2	2776	Y	Curated	Phosphorylation
PF3D7_1421000	PF3D7_1421000.1	DIX	140	S	Curated	Phosphorylation
PF3D7_0723800	PF3D7_0723800.1	N/A	17	S	Curated	Phosphorylation
PF3D7_1014900	PF3D7_1014900.1	KIC8	147	S	Curated	Phosphorylation
PF3D7_1107300	PF3D7_1107300.1	PAIP1	389	S	Curated	Phosphorylation
PF3D7_1476300	PF3D7_1476300.1	N/A	523	S	Curated	Phosphorylation
PF3D7_1133200	PF3D7_1133200.1	N/A	718	S	Curated	Phosphorylation
PF3D7_0730300	PF3D7_0730300.1	ApiAP2	948	S	Curated	Phosphorylation
PF3D7_1464500	PF3D7_1464500.1	N/A	1150	S	Curated	Phosphorylation
PF3D7_1004400	PF3D7_1004400.1	N/A	94	S	Curated	Phosphorylation
PF3D7_0826100	PF3D7_0826100.1	HEUL	5919	T	Curated	Phosphorylation
PF3D7_1015100	PF3D7_1015100.1	N/A	211	S	Curated	Phosphorylation
PF3D7_0806800	PF3D7_0806800.1	N/A	253	S	Curated	Phosphorylation
PF3D7_0806800	PF3D7_0806800.1	N/A	910	S	Curated	Phosphorylation
PF3D7_0305200	PF3D7_0305200.1	N/A	915	T	Curated	Phosphorylation
PF3D7_1308400	PF3D7_1308400.1	N/A	795	S	Curated	Phosphorylation
PF3D7_0612200	PF3D7_0612200.1	LRR6	113	Y	Curated	Phosphorylation
PF3D7_1437000	PF3D7_1437000.1	N/A	398	S	Curated	Phosphorylation
PF3D7_0311100	PF3D7_0311100.1	N/A	558	S	Curated	Phosphorylation
PF3D7_0826100	PF3D7_0826100.1	HEUL	4155	S	Curated	Phosphorylation
PF3D7_0314700	PF3D7_0314700.1	RNF1	1024	S	Curated	Phosphorylation
PF3D7_0318200	PF3D7_0318200.1	RPB1	1675	S	Curated	Phosphorylation
PF3D7_0318200	PF3D7_0318200.1	RPB1	2373	S	Curated	Phosphorylation
PF3D7_0926100	PF3D7_0926100.1	N/A	977	S	Curated	Phosphorylation
PF3D7_1408700	PF3D7_1408700.1	N/A	1371	S	Curated	Phosphorylation
PF3D7_0704100	PF3D7_0704100.1	BTP2	2793	T	Curated	Phosphorylation
PF3D7_1343000	PF3D7_1343000.1	PMT	113	T	Curated	Phosphorylation
PF3D7_1464000	PF3D7_1464000.1	N/A	229	S	Curated	Phosphorylation
PF3D7_1122500	PF3D7_1122500.1	KIC10	829	S	Curated	Phosphorylation
PF3D7_0611600	PF3D7_0611600.1	BTP1	184	Y	Curated	Phosphorylation
PF3D7_0321800	PF3D7_0321800.1	N/A	2162	S	Curated	Phosphorylation
PF3D7_1360900	PF3D7_1360900.1	N/A	195	S	Curated	Phosphorylation
PF3D7_1408700	PF3D7_1408700.1	N/A	6890	S	Curated	Phosphorylation
PF3D7_1437200	PF3D7_1437200.1	N/A	822	S	Curated	Phosphorylation
PF3D7_1107300	PF3D7_1107300.1	PAIP1	3080	S	Curated	Phosphorylation
PF3D7_1435600	PF3D7_1435600.1	N/A	645	S	Curated	Phosphorylation
PF3D7_1209300	PF3D7_1209300.1	TRZ	27	S	Curated	Phosphorylation
PF3D7_1458000	PF3D7_1458000.1	FP1	16	S	Curated	Phosphorylation
PF3D7_1110400	PF3D7_1110400.1	N/A	806	S	Curated	Phosphorylation
PF3D7_1238600	PF3D7_1238600.1	NSM	112	S	Curated	Phosphorylation
PF3D7_0815800	PF3D7_0815800.1	VPS9	1215	S	Curated	Phosphorylation
PF3D7_1450100	PF3D7_1450100.1	SRP54	241	S	Curated	Phosphorylation
PF3D7_0708400	PF3D7_0708400.1	HSP90	252	S	Curated	Phosphorylation
PF3D7_1329100	PF3D7_1329100.1	MyoF	1363	S	Curated	Phosphorylation
PF3D7_1134300	PF3D7_1134300.1	EMMA1	1193	S	Curated	Phosphorylation
PF3D7_1115800	PF3D7_1115800.1	N/A	173	T	Curated	Phosphorylation
PF3D7_0922100	PF3D7_0922100.1	N/A	1073	S	Curated	Phosphorylation
PF3D7_0602600	PF3D7_0602600.1	N/A	1194	S	Curated	Phosphorylation
PF3D7_0930500	PF3D7_0930500.1	DGK1	1248	S	Curated	Phosphorylation
PF3D7_0729300	PF3D7_0729300.1	NMD3	685	S	Curated	Phosphorylation
PF3D7_1447800	PF3D7_1447800.1	N/A	351	S	Curated	Phosphorylation
PF3D7_0511500	PF3D7_0511500.1	N/A	9925	S	Curated	Phosphorylation
PF3D7_0401800	PF3D7_0401800.1	PfD80	288	S	Curated	Phosphorylation
PF3D7_1303500	PF3D7_1303500.1	NHE	1000	S	Curated	Phosphorylation
PF3D7_0812100	PF3D7_0812100.1	N/A	1702	S	Curated	Phosphorylation
PF3D7_1205100	PF3D7_1205100.1	SEPSECS	475	S	Curated	Phosphorylation
PF3D7_1023900	PF3D7_1023900.1	CHD1	314	S	Curated	Phosphorylation
PF3D7_0212500	PF3D7_0212500.1	N/A	1917	S	Curated	Phosphorylation
PF3D7_0617200	PF3D7_0617200.1	N/A	178	S	Curated	Phosphorylation
PF3D7_0517700	PF3D7_0517700.1	EIF3B	22	S	Curated	Phosphorylation
PF3D7_1321500	PF3D7_1321500.1	PDEbeta	141	S	Curated	Phosphorylation
PF3D7_0604500	PF3D7_0604500.1	N/A	2707	S	Curated	Phosphorylation
PF3D7_1021700	PF3D7_1021700.1	N/A	6173	S	Curated	Phosphorylation
PF3D7_0928300	PF3D7_0928300.1	N/A	127	S	Curated	Phosphorylation
PF3D7_1312100	PF3D7_1312100.1	N/A	739	S	Curated	Phosphorylation
PF3D7_0911100	PF3D7_0911100.1	N/A	736	S	Curated	Phosphorylation
PF3D7_1423700	PF3D7_1423700.1	N/A	1248	S	Curated	Phosphorylation
PF3D7_0813400	PF3D7_0813400.1	N/A	382	S	Curated	Phosphorylation
PF3D7_1008000	PF3D7_1008000.1	HDA2	1472	S	Curated	Phosphorylation
PF3D7_1320700	PF3D7_1320700.1	N/A	1412	S	Curated	Phosphorylation
PF3D7_0617800	PF3D7_0617800.1	H2A	127	T	Curated	Phosphorylation
PF3D7_0822900	PF3D7_0822900.1	PIC2	1016	T	Curated	Phosphorylation
PF3D7_1227600	PF3D7_1227600.1	SPC24	585	S	Curated	Phosphorylation
PF3D7_1418900	PF3D7_1418900.1	DBP4	866	S	Curated	Phosphorylation
PF3D7_1343300	PF3D7_1343300.1	N/A	190	S	Curated	Phosphorylation
PF3D7_1304100	PF3D7_1304100.1	LigI	909	T	Curated	Phosphorylation
PF3D7_1467900	PF3D7_1467900.1	N/A	253	Y	Curated	Phosphorylation
PF3D7_0905100	PF3D7_0905100.1	NUP221	94	S	Curated	Phosphorylation
PF3D7_1435600	PF3D7_1435600.1	N/A	689	S	Curated	Phosphorylation
PF3D7_0813000	PF3D7_0813000.1	KIC7	579	S	Curated	Phosphorylation
PF3D7_1343700	PF3D7_1343700.1	Kelch13	66	S	Curated	Phosphorylation
PF3D7_0907200	PF3D7_0907200.1	N/A	284	S	Curated	Phosphorylation
PF3D7_1458500	PF3D7_1458500.1	SAS4	221	S	Curated	Phosphorylation
PF3D7_1212900	PF3D7_1212900.1	BDP2	269	T	Curated	Phosphorylation
PF3D7_1138000	PF3D7_1138000.1	N/A	1962	S	Curated	Phosphorylation
PF3D7_0610400	PF3D7_0610400.1	H3	58	S	Curated	Phosphorylation
PF3D7_0504800	PF3D7_0504800.1	N/A	1954	T	Curated	Phosphorylation
PF3D7_0416200	PF3D7_0416200.1	N/A	53	S	Curated	Phosphorylation
PF3D7_0209100	PF3D7_0209100.1	PATPL1	20	S	Curated	Phosphorylation
PF3D7_1203400	PF3D7_1203400.1	MFS4	740	S	Curated	Phosphorylation
PF3D7_1440000	PF3D7_1440000.1	N/A	1789	S	Curated	Phosphorylation
PF3D7_1462800	PF3D7_1462800.1	GAPDH	280	T	Curated	Phosphorylation
PF3D7_0624600	PF3D7_0624600.1	ISWI	2597	S	Curated	Phosphorylation
PF3D7_1440100	PF3D7_1440100.1	N/A	263	S	Curated	Phosphorylation
PF3D7_1353300	PF3D7_1353300.1	N/A	1132	S	Curated	Phosphorylation
PF3D7_0826100	PF3D7_0826100.1	HEUL	2055	S	Curated	Phosphorylation
PF3D7_1110400	PF3D7_1110400.1	N/A	1382	S	Curated	Phosphorylation
PF3D7_1018600	PF3D7_1018600.1	N/A	1324	S	Curated	Phosphorylation
PF3D7_0714200	PF3D7_0714200.1	N/A	956	S	Curated	Phosphorylation
PF3D7_0912500	PF3D7_0912500.1	N/A	218	T	Curated	Phosphorylation
PF3D7_1227200	PF3D7_1227200.1	K1	490	S	Curated	Phosphorylation
PF3D7_0604500	PF3D7_0604500.1	N/A	1012	S	Curated	Phosphorylation
PF3D7_0317300	PF3D7_0317300.1	N/A	2980	S	Curated	Phosphorylation
PF3D7_1417200	PF3D7_1417200.1	NOT1	1168	S	Curated	Phosphorylation
PF3D7_1014300	PF3D7_1014300.1	N/A	1757	S	Curated	Phosphorylation
PF3D7_1403100	PF3D7_1403100.1	CAPD2	325	S	Curated	Phosphorylation
PF3D7_1138700	PF3D7_1138700.1	KIC5	669	Y	Curated	Phosphorylation
PF3D7_1405800	PF3D7_1405800.1	BOP1	104	S	Curated	Phosphorylation
PF3D7_0402400	PF3D7_0402400.1	GEXP18	90	S	Curated	Phosphorylation
PF3D7_1447800	PF3D7_1447800.1	N/A	415	S	Curated	Phosphorylation
PF3D7_1476300	PF3D7_1476300.1	N/A	352	S	Curated	Phosphorylation
PF3D7_1442400	PF3D7_1442400.1	KIC9	431	T	Curated	Phosphorylation
PF3D7_0906100	PF3D7_0906100.1	VPS46	185	S	Curated	Phosphorylation
PF3D7_0912500	PF3D7_0912500.1	N/A	193	T	Curated	Phosphorylation
PF3D7_1446400	PF3D7_1446400.1	pdhB	79	T	Curated	Phosphorylation
PF3D7_0305500	PF3D7_0305500.1	N/A	2302	S	Curated	Phosphorylation
PF3D7_0907300	PF3D7_0907300.1	N/A	171	S	Curated	Phosphorylation
PF3D7_1124100	PF3D7_1124100.1	BDCP	955	S	Curated	Phosphorylation
PF3D7_0317200	PF3D7_0317200.1	CRK4	132	S	Curated	Phosphorylation
PF3D7_1149000	PF3D7_1149000.1	Pf332	2583	S	Curated	Phosphorylation
PF3D7_0702500	PF3D7_0702500.1	N/A	238	T	Curated	Phosphorylation
PF3D7_1115200	PF3D7_1115200.1	SET7	122	S	Curated	Phosphorylation
PF3D7_1140200	PF3D7_1140200.1	N/A	117	S	Curated	Phosphorylation
PF3D7_0815800	PF3D7_0815800.1	VPS9	417	S	Curated	Phosphorylation
PF3D7_1208400	PF3D7_1208400.1	N/A	614	S	Curated	Phosphorylation
PF3D7_0823800	PF3D7_0823800.1	N/A	24	S	Curated	Phosphorylation
PF3D7_1110200	PF3D7_1110200.1	PRPF6	238	S	Curated	Phosphorylation
PF3D7_0628100	PF3D7_0628100.1	HECT1	6618	S	Curated	Phosphorylation
PF3D7_0208100	PF3D7_0208100.1	N/A	1298	S	Curated	Phosphorylation
PF3D7_0705100	PF3D7_0705100.1	N/A	6	S	Curated	Phosphorylation
PF3D7_0317200	PF3D7_0317200.1	CRK4	441	S	Curated	Phosphorylation
PF3D7_0830500	PF3D7_0830500.1	TryThrA	103	S	Curated	Phosphorylation
PF3D7_1107300	PF3D7_1107300.1	PAIP1	1429	S	Curated	Phosphorylation
PF3D7_0507100	PF3D7_0507100.1	RPL4	318	S	Curated	Phosphorylation
PF3D7_1303200	PF3D7_1303200.1	VAMP8	121	T	Curated	Phosphorylation
PF3D7_0526200	PF3D7_0526200.1	ARFGAP2	305	S	Curated	Phosphorylation
PF3D7_1437000	PF3D7_1437000.1	N/A	532	S	Curated	Phosphorylation
PF3D7_1456500	PF3D7_1456500.1	N/A	2359	S	Curated	Phosphorylation
PF3D7_1207100	PF3D7_1207100.1	N/A	708	S	Curated	Phosphorylation
PF3D7_0920700	PF3D7_0920700.1	N/A	123	T	Curated	Phosphorylation
PF3D7_1011800	PF3D7_1011800.1	PREBP	20	S	Curated	Phosphorylation
PF3D7_1440100	PF3D7_1440100.1	N/A	261	Y	Curated	Phosphorylation
PF3D7_1008800	PF3D7_1008800.1	NOP5	146	S	Curated	Phosphorylation
PF3D7_1335100	PF3D7_1335100.1	MSP7	54	S	Curated	Phosphorylation
PF3D7_0824400	PF3D7_0824400.1	NT2	353	S	Curated	Phosphorylation
PF3D7_1321700	PF3D7_1321700.1	SF1	28	S	Curated	Phosphorylation
PF3D7_1116100	PF3D7_1116100.1	N/A	1710	T	Curated	Phosphorylation
PF3D7_1134800	PF3D7_1134800.1	N/A	139	S	Curated	Phosphorylation
PF3D7_1207000	PF3D7_1207000.1	N/A	86	S	Curated	Phosphorylation
PF3D7_0108300	PF3D7_0108300.1	ARP	1051	S	Curated	Phosphorylation
PF3D7_0618900	PF3D7_0618900.1	GPI1	227	S	Curated	Phosphorylation
PF3D7_0423500	PF3D7_0423500.1	GAPM2	369	T	Curated	Phosphorylation
PF3D7_0727400	PF3D7_0727400.1	N/A	55	S	Curated	Phosphorylation
PF3D7_0613800	PF3D7_0613800.1	ApiAP2	3741	S	Curated	Phosphorylation
PF3D7_0719900	PF3D7_0719900.1	N/A	3202	S	Curated	Phosphorylation
PF3D7_0317300	PF3D7_0317300.1	N/A	1085	S	Curated	Phosphorylation
PF3D7_0811300	PF3D7_0811300.1	CAF1	834	S	Curated	Phosphorylation
PF3D7_1359900	PF3D7_1359900.1	N/A	1972	T	Curated	Phosphorylation
PF3D7_1207000	PF3D7_1207000.1	N/A	372	Y	Curated	Phosphorylation
PF3D7_1126800	PF3D7_1126800.1	SR-MG	677	S	Curated	Phosphorylation
PF3D7_0930300	PF3D7_0930300.1	MSP1	120	S	Curated	Phosphorylation
PF3D7_1468100	PF3D7_1468100.1	MORC	2130	S	Curated	Phosphorylation
PF3D7_1224000	PF3D7_1224000.1	GCH1	383	S	Curated	Phosphorylation
PF3D7_0627100	PF3D7_0627100.1	N/A	218	T	Curated	Phosphorylation
PF3D7_1008000	PF3D7_1008000.1	HDA2	24	S	Curated	Phosphorylation
PF3D7_0628100	PF3D7_0628100.1	HECT1	7217	S	Curated	Phosphorylation
PF3D7_1473200	PF3D7_1473200.1	N/A	361	S	Curated	Phosphorylation
PF3D7_0311100	PF3D7_0311100.1	N/A	560	T	Curated	Phosphorylation
PF3D7_1367100	PF3D7_1367100.1	SNP1	249	S	Curated	Phosphorylation
PF3D7_1307200	PF3D7_1307200.1	N/A	9	S	Curated	Phosphorylation
PF3D7_1328000	PF3D7_1328000.1	N/A	2142	S	Curated	Phosphorylation
PF3D7_1437500	PF3D7_1437500.1	N/A	47	S	Curated	Phosphorylation
PF3D7_0723400	PF3D7_0723400.1	N/A	937	T	Curated	Phosphorylation
PF3D7_0522400	PF3D7_0522400.1	N/A	3043	S	Curated	Phosphorylation
PF3D7_1439800	PF3D7_1439800.1	N/A	130	Y	Curated	Phosphorylation
PF3D7_1003600	PF3D7_1003600.1	IMC1c	252	S	Curated	Phosphorylation
PF3D7_0630600	PF3D7_0630600.1	N/A	712	S	Curated	Phosphorylation
PF3D7_1305000	PF3D7_1305000.1	N/A	732	S	Curated	Phosphorylation
PF3D7_0714200	PF3D7_0714200.1	N/A	183	S	Curated	Phosphorylation
PF3D7_1212700	PF3D7_1212700.1	EIF3A	121	S	Curated	Phosphorylation
PF3D7_1316100	PF3D7_1316100.1	IPK2	1536	S	Curated	Phosphorylation
PF3D7_0914900	PF3D7_0914900.1	N/A	561	S	Curated	Phosphorylation
PF3D7_1353300	PF3D7_1353300.1	N/A	1623	S	Curated	Phosphorylation
PF3D7_1221000	PF3D7_1221000.1	SET10	4	S	Curated	Phosphorylation
PF3D7_1248900	PF3D7_1248900.1	RPT6	22	S	Curated	Phosphorylation
PF3D7_1407100	PF3D7_1407100.1	NOP1	16	S	Curated	Phosphorylation
PF3D7_0823100	PF3D7_0823100.1	N/A	114	S	Curated	Phosphorylation
PF3D7_1207000	PF3D7_1207000.1	N/A	1940	S	Curated	Phosphorylation
PF3D7_1148000	PF3D7_1148000.1	N/A	680	S	Curated	Phosphorylation
PF3D7_1116500	PF3D7_1116500.1	FT2	11	S	Curated	Phosphorylation
PF3D7_1227600	PF3D7_1227600.1	SPC24	435	S	Curated	Phosphorylation
PF3D7_0709400	PF3D7_0709400.1	N/A	328	S	Curated	Phosphorylation
PF3D7_1356800	PF3D7_1356800.1	ARK3	1932	S	Curated	Phosphorylation
PF3D7_1417700	PF3D7_1417700.1	N/A	132	S	Curated	Phosphorylation
PF3D7_1321300	PF3D7_1321300.1	N/A	546	S	Curated	Phosphorylation
PF3D7_0705500	PF3D7_0705500.1	N/A	2296	S	Curated	Phosphorylation
PF3D7_1019000	PF3D7_1019000.1	N/A	1126	S	Curated	Phosphorylation
PF3D7_1356100	PF3D7_1356100.1	N/A	874	S	Curated	Phosphorylation
PF3D7_0719900	PF3D7_0719900.1	N/A	3148	S	Curated	Phosphorylation
PF3D7_0704800	PF3D7_0704800.1	PPM12	1001	S	Curated	Phosphorylation
PF3D7_0618000	PF3D7_0618000.1	N/A	47	S	Curated	Phosphorylation
PF3D7_0705500	PF3D7_0705500.1	N/A	687	S	Curated	Phosphorylation
PF3D7_0322900	PF3D7_0322900.1	RPS3A	46	T	Curated	Phosphorylation
PF3D7_1405100	PF3D7_1405100.1	N/A	87	S	Curated	Phosphorylation
PF3D7_0729100	PF3D7_0729100.1	N/A	1342	S	Curated	Phosphorylation
PF3D7_1343800	PF3D7_1343800.1	N/A	1469	T	Curated	Phosphorylation
PF3D7_1362700	PF3D7_1362700.1	N/A	221	S	Curated	Phosphorylation
PF3D7_1457900	PF3D7_1457900.1	N/A	329	S	Curated	Phosphorylation
PF3D7_0619000	PF3D7_0619000.1	N/A	671	S	Curated	Phosphorylation
PF3D7_1021800	PF3D7_1021800.1	SEA1	344	S	Curated	Phosphorylation
PF3D7_1014900	PF3D7_1014900.1	KIC8	1645	T	Curated	Phosphorylation
PF3D7_1014600	PF3D7_1014600.1	ADA2	1845	S	Curated	Phosphorylation
PF3D7_0821400	PF3D7_0821400.1	N/A	109	S	Curated	Phosphorylation
PF3D7_1425800	PF3D7_1425800.1	N/A	380	S	Curated	Phosphorylation
PF3D7_1312100	PF3D7_1312100.1	N/A	197	S	Curated	Phosphorylation
PF3D7_1008100	PF3D7_1008100.1	PHD1	1142	S	Curated	Phosphorylation
PF3D7_1413700	PF3D7_1413700.1	N/A	795	T	Curated	Phosphorylation
PF3D7_1410300	PF3D7_1410300.1	N/A	2771	S	Curated	Phosphorylation
PF3D7_0822900	PF3D7_0822900.1	PIC2	1064	S	Curated	Phosphorylation
PF3D7_0913200	PF3D7_0913200.1	EF-1beta	127	S	Curated	Phosphorylation
PF3D7_1357000	PF3D7_1357000.1	N/A	385	S	Curated	Phosphorylation
PF3D7_0714200	PF3D7_0714200.1	N/A	1086	S	Curated	Phosphorylation
PF3D7_1019100	PF3D7_1019100.1	N/A	951	S	Curated	Phosphorylation
PF3D7_1474900	PF3D7_1474900.1	CITH	81	T	Curated	Phosphorylation
PF3D7_1130700	PF3D7_1130700.1	SMC1	228	T	Curated	Phosphorylation
PF3D7_1455300	PF3D7_1455300.1	N/A	532	T	Curated	Phosphorylation
PF3D7_0912800	PF3D7_0912800.1	GCD10	411	S	Curated	Phosphorylation
PF3D7_1206200	PF3D7_1206200.1	EIF3C	564	S	Curated	Phosphorylation
PF3D7_1033700	PF3D7_1033700.1	BDP1	221	S	Curated	Phosphorylation
PF3D7_0707700	PF3D7_0707700.1	N/A	675	Y	Curated	Phosphorylation
PF3D7_1317800	PF3D7_1317800.1	RPS19	136	T	Curated	Phosphorylation
PF3D7_0813000	PF3D7_0813000.1	KIC7	85	S	Curated	Phosphorylation
PF3D7_0507600	PF3D7_0507600.1	CAF40	88	S	Curated	Phosphorylation
PF3D7_1403100	PF3D7_1403100.1	CAPD2	229	S	Curated	Phosphorylation
PF3D7_0419800	PF3D7_0419800.1	N/A	107	S	Curated	Phosphorylation
PF3D7_1014900	PF3D7_1014900.1	KIC8	22	S	Curated	Phosphorylation
PF3D7_1221300	PF3D7_1221300.1	N/A	258	S	Curated	Phosphorylation
PF3D7_1369500	PF3D7_1369500.1	N/A	255	S	Curated	Phosphorylation
PF3D7_0812100	PF3D7_0812100.1	N/A	1229	S	Curated	Phosphorylation
PF3D7_0510100	PF3D7_0510100.1	N/A	2036	T	Curated	Phosphorylation
PF3D7_1004400	PF3D7_1004400.1	N/A	341	S	Curated	Phosphorylation
PF3D7_1014900	PF3D7_1014900.1	KIC8	936	T	Curated	Phosphorylation
PF3D7_1102500	PF3D7_1102500.1	GEXP02	376	S	Curated	Phosphorylation
PF3D7_1408400	PF3D7_1408400.1	FANCJ	309	T	Curated	Phosphorylation
PF3D7_1441600	PF3D7_1441600.1	N/A	498	S	Curated	Phosphorylation
PF3D7_1402300	PF3D7_1402300.1	RPN6	393	S	Curated	Phosphorylation
PF3D7_1201900	PF3D7_1201900.1	N/A	76	S	Curated	Phosphorylation
PF3D7_0220600	PF3D7_0220600.1	N/A	99	S	Curated	Phosphorylation
PF3D7_0813300	PF3D7_0813300.1	N/A	126	T	Curated	Phosphorylation
PF3D7_0407800	PF3D7_0407800.1	CINCH	592	S	Curated	Phosphorylation
PF3D7_1025500	PF3D7_1025500.1	N/A	2690	Y	Curated	Phosphorylation
PF3D7_1105300	PF3D7_1105300.1	N/A	727	T	Curated	Phosphorylation
PF3D7_1219100	PF3D7_1219100.1	CHC	1350	S	Curated	Phosphorylation
PF3D7_0501400	PF3D7_0501400.1	FIRA	1184	S	Curated	Phosphorylation
PF3D7_1325400	PF3D7_1325400.1	N/A	1355	S	Curated	Phosphorylation
PF3D7_0812500	PF3D7_0812500.1	N/A	884	S	Curated	Phosphorylation
PF3D7_1323200	PF3D7_1323200.1	N/A	116	S	Curated	Phosphorylation
PF3D7_1412600	PF3D7_1412600.1	DHS	15	S	Curated	Phosphorylation
PF3D7_1346100	PF3D7_1346100.1	SEC61A	408	S	Curated	Phosphorylation
PF3D7_1325900	PF3D7_1325900.1	N/A	2554	S	Curated	Phosphorylation
PF3D7_1116100	PF3D7_1116100.1	N/A	561	T	Curated	Phosphorylation
PF3D7_1409400	PF3D7_1409400.1	N/A	199	S	Curated	Phosphorylation
PF3D7_0408500	PF3D7_0408500.1	FEN1	503	S	Curated	Phosphorylation
PF3D7_1366700	PF3D7_1366700.1	N/A	258	Y	Curated	Phosphorylation
PF3D7_0815800	PF3D7_0815800.1	VPS9	597	S	Curated	Phosphorylation
PF3D7_0716800	PF3D7_0716800.1	EIF3I	278	S	Curated	Phosphorylation
PF3D7_1320700	PF3D7_1320700.1	N/A	872	S	Curated	Phosphorylation
PF3D7_1138800	PF3D7_1138800.1	N/A	1214	S	Curated	Phosphorylation
PF3D7_0927200	PF3D7_0927200.1	N/A	895	S	Curated	Phosphorylation
PF3D7_1456500	PF3D7_1456500.1	N/A	15	S	Curated	Phosphorylation
PF3D7_0912900	PF3D7_0912900.1	RPN8	192	S	Curated	Phosphorylation
PF3D7_1228400	PF3D7_1228400.1	N/A	83	S	Curated	Phosphorylation
PF3D7_0505500	PF3D7_0505500.1	MSH6	256	S	Curated	Phosphorylation
PF3D7_0208400	PF3D7_0208400.1	N/A	706	S	Curated	Phosphorylation
PF3D7_0515700	PF3D7_0515700.1	GAP40	444	Y	Curated	Phosphorylation
PF3D7_1107300	PF3D7_1107300.1	PAIP1	1615	S	Curated	Phosphorylation
PF3D7_0628100	PF3D7_0628100.1	HECT1	5002	S	Curated	Phosphorylation
PF3D7_0707300	PF3D7_0707300.1	RAMA	417	S	Curated	Phosphorylation
PF3D7_1433100	PF3D7_1433100.1	N/A	627	S	Curated	Phosphorylation
PF3D7_1126700	PF3D7_1126700.1	ATG23	824	S	Curated	Phosphorylation
PF3D7_0629700	PF3D7_0629700.1	SET1	6186	S	Curated	Phosphorylation
PF3D7_0911400	PF3D7_0911400.1	N/A	805	Y	Curated	Phosphorylation
PF3D7_1107800	PF3D7_1107800.1	ApiAP2	1565	S	Curated	Phosphorylation
PF3D7_0810300	PF3D7_0810300.1	PPM5	227	S	Curated	Phosphorylation
PF3D7_0716000	PF3D7_0716000.1	N/A	1119	S	Curated	Phosphorylation
PF3D7_1014300	PF3D7_1014300.1	N/A	1759	T	Curated	Phosphorylation
PF3D7_0614300	PF3D7_0614300.1	MFR1	395	T	Curated	Phosphorylation
PF3D7_0624600	PF3D7_0624600.1	ISWI	1751	S	Curated	Phosphorylation
PF3D7_1314100	PF3D7_1314100.1	N/A	692	S	Curated	Phosphorylation
PF3D7_1359900	PF3D7_1359900.1	N/A	1355	S	Curated	Phosphorylation
PF3D7_1021900	PF3D7_1021900.1	N/A	566	T	Curated	Phosphorylation
PF3D7_0804500	PF3D7_0804500.1	N/A	202	T	Curated	Phosphorylation
PF3D7_1002400	PF3D7_1002400.1	TRA2B	182	S	Curated	Phosphorylation
PF3D7_0402000	PF3D7_0402000.1	N/A	225	Y	Curated	Phosphorylation
PF3D7_0818000	PF3D7_0818000.1	SNRNP27	316	S	Curated	Phosphorylation
PF3D7_1029600	PF3D7_1029600.1	ADA	264	S	Curated	Phosphorylation
PF3D7_0305500	PF3D7_0305500.1	N/A	2562	Y	Curated	Phosphorylation
PF3D7_1359900	PF3D7_1359900.1	N/A	1978	T	Curated	Phosphorylation
PF3D7_0528400	PF3D7_0528400.1	DHHC7	237	S	Curated	Phosphorylation
PF3D7_1220900	PF3D7_1220900.1	HP1	57	S	Curated	Phosphorylation
PF3D7_0609700	PF3D7_0609700.1	KIC6	1009	S	Curated	Phosphorylation
PF3D7_1328200	PF3D7_1328200.1	N/A	1538	S	Curated	Phosphorylation
PF3D7_0802600	PF3D7_0802600.1	ACbeta	1394	S	Curated	Phosphorylation
PF3D7_0806800	PF3D7_0806800.1	N/A	902	T	Curated	Phosphorylation
PF3D7_0308300	PF3D7_0308300.1	PIC4	217	S	Curated	Phosphorylation
PF3D7_0621900	PF3D7_0621900.1	SRP68	6	S	Curated	Phosphorylation
PF3D7_0722200	PF3D7_0722200.1	RALP1	623	S	Curated	Phosphorylation
PF3D7_1312800	PF3D7_1312800.1	AAP2	201	T	Curated	Phosphorylation
PF3D7_1361100	PF3D7_1361100.1	SEC24A	931	T	Curated	Phosphorylation
PF3D7_1325400	PF3D7_1325400.1	N/A	1545	S	Curated	Phosphorylation
PF3D7_1445400	PF3D7_1445400.1	CLK1	270	S	Curated	Phosphorylation
PF3D7_0501400	PF3D7_0501400.1	FIRA	677	S	Curated	Phosphorylation
PF3D7_1014600	PF3D7_1014600.1	ADA2	1848	T	Curated	Phosphorylation
PF3D7_1339300	PF3D7_1339300.1	N/A	18	S	Curated	Phosphorylation
PF3D7_1136800	PF3D7_1136800.1	N/A	57	S	Curated	Phosphorylation
PF3D7_1014900	PF3D7_1014900.1	KIC8	992	S	Curated	Phosphorylation
PF3D7_1311500	PF3D7_1311500.1	RPT1	25	S	Curated	Phosphorylation
PF3D7_0709400	PF3D7_0709400.1	N/A	964	S	Curated	Phosphorylation
PF3D7_1436300	PF3D7_1436300.1	PTEX150	574	S	Curated	Phosphorylation
PF3D7_1343700	PF3D7_1343700.1	Kelch13	56	T	Curated	Phosphorylation
PF3D7_1308400	PF3D7_1308400.1	N/A	704	Y	Curated	Phosphorylation
PF3D7_0616200	PF3D7_0616200.1	NDC80	37	S	Curated	Phosphorylation
PF3D7_1405100	PF3D7_1405100.1	N/A	114	S	Curated	Phosphorylation
PF3D7_1419000	PF3D7_1419000.1	N/A	83	S	Curated	Phosphorylation
PF3D7_0508900	PF3D7_0508900.1	AAP6	2931	T	Curated	Phosphorylation
PF3D7_0607000	PF3D7_0607000.1	N/A	352	S	Curated	Phosphorylation
PF3D7_1103800	PF3D7_1103800.1	NOT1-G	2625	S	Curated	Phosphorylation
PF3D7_1219000	PF3D7_1219000.1	FRM2	1375	S	Curated	Phosphorylation
PF3D7_0304100	PF3D7_0304100.1	IMC1e	59	S	Curated	Phosphorylation
PF3D7_0210600	PF3D7_0210600.1	CERLI1	444	Y	Curated	Phosphorylation
PF3D7_1451200	PF3D7_1451200.1	N/A	604	S	Curated	Phosphorylation
PF3D7_1202600	PF3D7_1202600.1	NEMF	584	S	Curated	Phosphorylation
PF3D7_1419600	PF3D7_1419600.1	N/A	405	S	Curated	Phosphorylation
PF3D7_0922100	PF3D7_0922100.1	N/A	293	S	Curated	Phosphorylation
PF3D7_1023900	PF3D7_1023900.1	CHD1	820	T	Curated	Phosphorylation
PF3D7_0531100	PF3D7_0531100.1	N/A	1037	S	Curated	Phosphorylation
PF3D7_1019100	PF3D7_1019100.1	N/A	1662	S	Curated	Phosphorylation
PF3D7_1419000	PF3D7_1419000.1	N/A	514	S	Curated	Phosphorylation
PF3D7_1474000	PF3D7_1474000.1	N/A	249	S	Curated	Phosphorylation
PF3D7_0730900	PF3D7_0730900.1	PTP4	1677	S	Curated	Phosphorylation
PF3D7_0719900	PF3D7_0719900.1	N/A	3144	T	Curated	Phosphorylation
PF3D7_0407800	PF3D7_0407800.1	CINCH	1567	S	Curated	Phosphorylation
PF3D7_1410300	PF3D7_1410300.1	N/A	1772	S	Curated	Phosphorylation
PF3D7_0611400	PF3D7_0611400.1	SWIB	459	S	Curated	Phosphorylation
PF3D7_0317200	PF3D7_0317200.1	CRK4	630	S	Curated	Phosphorylation
PF3D7_0822900	PF3D7_0822900.1	PIC2	619	S	Curated	Phosphorylation
PF3D7_1447900	PF3D7_1447900.1	MDR2	976	S	Curated	Phosphorylation
PF3D7_1207000	PF3D7_1207000.1	N/A	1942	S	Curated	Phosphorylation
PF3D7_1004200	PF3D7_1004200.1	N/A	437	S	Curated	Phosphorylation
PF3D7_0615400	PF3D7_0615400.1	N/A	1592	T	Curated	Phosphorylation
PF3D7_0624000	PF3D7_0624000.1	HK	18	T	Curated	Phosphorylation
PF3D7_1022400	PF3D7_1022400.1	SRSF4	86	S	Curated	Phosphorylation
PF3D7_0320000	PF3D7_0320000.1	I2	50	S	Curated	Phosphorylation
PF3D7_0317700	PF3D7_0317700.1	N/A	339	S	Curated	Phosphorylation
PF3D7_0730500	PF3D7_0730500.1	N/A	1109	S	Curated	Phosphorylation
PF3D7_0907700	PF3D7_0907700.1	PA28	113	S	Curated	Phosphorylation
PF3D7_0911100	PF3D7_0911100.1	N/A	869	S	Curated	Phosphorylation
PF3D7_1416200	PF3D7_1416200.1	MCA3	110	S	Curated	Phosphorylation
PF3D7_1449100	PF3D7_1449100.1	N/A	320	S	Curated	Phosphorylation
PF3D7_1419000	PF3D7_1419000.1	N/A	82	S	Curated	Phosphorylation
PF3D7_1346400	PF3D7_1346400.1	N/A	2435	T	Curated	Phosphorylation
PF3D7_0403800	PF3D7_0403800.1	N/A	373	S	Curated	Phosphorylation
PF3D7_1238100	PF3D7_1238100.1	N/A	179	S	Curated	Phosphorylation
PF3D7_0307500	PF3D7_0307500.1	SKA2	171	T	Curated	Phosphorylation
PF3D7_0503300	PF3D7_0503300.1	SRSF12	255	S	Curated	Phosphorylation
PF3D7_1241500	PF3D7_1241500.1	N/A	10	S	Curated	Phosphorylation
PF3D7_1208900	PF3D7_1208900.1	PPM11	1296	S	Curated	Phosphorylation
PF3D7_0529800	PF3D7_0529800.1	N/A	1872	S	Curated	Phosphorylation
PF3D7_1012500	PF3D7_1012500.1	N/A	155	S	Curated	Phosphorylation
PF3D7_0813000	PF3D7_0813000.1	KIC7	303	S	Curated	Phosphorylation
PF3D7_1303800	PF3D7_1303800.1	N/A	1271	S	Curated	Phosphorylation
PF3D7_0715900	PF3D7_0715900.1	CDF	508	S	Curated	Phosphorylation
PF3D7_0703200	PF3D7_0703200.1	N/A	898	S	Curated	Phosphorylation
PF3D7_1014900	PF3D7_1014900.1	KIC8	2151	T	Curated	Phosphorylation
PF3D7_0702300	PF3D7_0702300.1	STARP	143	S	Curated	Phosphorylation
PF3D7_1116100	PF3D7_1116100.1	N/A	15	S	Curated	Phosphorylation
PF3D7_0105700	PF3D7_0105700.1	N/A	2813	T	Curated	Phosphorylation
PF3D7_0824800	PF3D7_0824800.1	N/A	78	S	Curated	Phosphorylation
PF3D7_0729100	PF3D7_0729100.1	N/A	941	S	Curated	Phosphorylation
PF3D7_0627800	PF3D7_0627800.1	ACAS	451	S	Curated	Phosphorylation
PF3D7_1311400	PF3D7_1311400.1	AP1M1	154	T	Curated	Phosphorylation
PF3D7_1442700	PF3D7_1442700.1	N/A	1834	Y	Curated	Phosphorylation
PF3D7_1109900	PF3D7_1109900.1	RPL36	5	S	Curated	Phosphorylation
PF3D7_0527000	PF3D7_0527000.1	MCM3	636	S	Curated	Phosphorylation
PF3D7_0501400	PF3D7_0501400.1	FIRA	1711	S	Curated	Phosphorylation
PF3D7_1328500	PF3D7_1328500.1	N/A	907	S	Curated	Phosphorylation
PF3D7_0704100	PF3D7_0704100.1	BTP2	2882	S	Curated	Phosphorylation
PF3D7_0605100	PF3D7_0605100.1	KH1	49	S	Curated	Phosphorylation
PF3D7_0927200	PF3D7_0927200.1	N/A	1129	S	Curated	Phosphorylation
PF3D7_0903500	PF3D7_0903500.1	NUP138	241	T	Curated	Phosphorylation
PF3D7_0515300	PF3D7_0515300.1	PI3K	1763	S	Curated	Phosphorylation
PF3D7_0212500	PF3D7_0212500.1	N/A	96	T	Curated	Phosphorylation
PF3D7_1149000	PF3D7_1149000.1	Pf332	1920	T	Curated	Phosphorylation
PF3D7_0202500	PF3D7_0202500.1	ETRAMP2	101	S	Curated	Phosphorylation
PF3D7_0504000	PF3D7_0504000.1	ATPase3	735	S	Curated	Phosphorylation
PF3D7_1334100	PF3D7_1334100.1	N/A	383	S	Curated	Phosphorylation
PF3D7_0415400	PF3D7_0415400.1	N/A	195	S	Curated	Phosphorylation
PF3D7_1025000	PF3D7_1025000.1	EPS15	797	S	Curated	Phosphorylation
PF3D7_0708400	PF3D7_0708400.1	HSP90	418	S	Curated	Phosphorylation
PF3D7_0708400	PF3D7_0708400.1	HSP90	642	S	Curated	Phosphorylation
PF3D7_1149000	PF3D7_1149000.1	Pf332	4805	S	Curated	Phosphorylation
PF3D7_0604100	PF3D7_0604100.1	SIP2	777	S	Curated	Phosphorylation
PF3D7_0708800	PF3D7_0708800.1	HSP110c	593	T	Curated	Phosphorylation
PF3D7_0602900	PF3D7_0602900.1	N/A	68	S	Curated	Phosphorylation
PF3D7_0619000	PF3D7_0619000.1	N/A	1693	S	Curated	Phosphorylation
PF3D7_0729100	PF3D7_0729100.1	N/A	2548	S	Curated	Phosphorylation
PF3D7_1138500	PF3D7_1138500.1	PPM2	257	S	Curated	Phosphorylation
PF3D7_0303200	PF3D7_0303200.1	N/A	1159	S	Curated	Phosphorylation
PF3D7_1021100	PF3D7_1021100.1	N/A	1373	S	Curated	Phosphorylation
PF3D7_0826300	PF3D7_0826300.1	N/A	79	T	Curated	Phosphorylation
PF3D7_0618000	PF3D7_0618000.1	N/A	383	S	Curated	Phosphorylation
PF3D7_0704100	PF3D7_0704100.1	BTP2	1811	S	Curated	Phosphorylation
PF3D7_1308400	PF3D7_1308400.1	N/A	508	S	Curated	Phosphorylation
PF3D7_1448500	PF3D7_1448500.1	N/A	2435	S	Curated	Phosphorylation
PF3D7_1223400	PF3D7_1223400.1	N/A	846	S	Curated	Phosphorylation
PF3D7_1356800	PF3D7_1356800.1	ARK3	295	S	Curated	Phosphorylation
PF3D7_0629700	PF3D7_0629700.1	SET1	241	T	Curated	Phosphorylation
PF3D7_1026600	PF3D7_1026600.1	N/A	274	S	Curated	Phosphorylation
PF3D7_1447800	PF3D7_1447800.1	N/A	499	S	Curated	Phosphorylation
PF3D7_1303400	PF3D7_1303400.1	LisH	842	S	Curated	Phosphorylation
PF3D7_1138400	PF3D7_1138400.1	GCalpha	540	S	Curated	Phosphorylation
PF3D7_1110400	PF3D7_1110400.1	N/A	1387	S	Curated	Phosphorylation
PF3D7_1340900	PF3D7_1340900.1	PiT	361	S	Curated	Phosphorylation
PF3D7_0627100	PF3D7_0627100.1	N/A	231	S	Curated	Phosphorylation
PF3D7_1313800	PF3D7_1313800.1	N/A	2197	S	Curated	Phosphorylation
PF3D7_0628200	PF3D7_0628200.1	PK4	1930	T	Curated	Phosphorylation
PF3D7_1461600	PF3D7_1461600.1	SF3B2	509	T	Curated	Phosphorylation
PF3D7_0417800	PF3D7_0417800.1	CRK1	108	S	Curated	Phosphorylation
PF3D7_1146200	PF3D7_1146200.1	N/A	85	S	Curated	Phosphorylation
PF3D7_0715800	PF3D7_0715800.1	DMT1	107	Y	Curated	Phosphorylation
PF3D7_0821400	PF3D7_0821400.1	N/A	19	S	Curated	Phosphorylation
PF3D7_1440800	PF3D7_1440800.1	MFS6	343	S	Curated	Phosphorylation
PF3D7_1438400	PF3D7_1438400.1	MCA2	395	T	Curated	Phosphorylation
PF3D7_1145200	PF3D7_1145200.1	N/A	866	S	Curated	Phosphorylation
PF3D7_1026600	PF3D7_1026600.1	N/A	584	S	Curated	Phosphorylation
PF3D7_0702500	PF3D7_0702500.1	N/A	180	S	Curated	Phosphorylation
PF3D7_1124600	PF3D7_1124600.1	EK	57	T	Curated	Phosphorylation
PF3D7_1108600	PF3D7_1108600.1	ERC	322	T	Curated	Phosphorylation
PF3D7_0511500	PF3D7_0511500.1	N/A	6882	S	Curated	Phosphorylation
PF3D7_0621900	PF3D7_0621900.1	SRP68	287	S	Curated	Phosphorylation
PF3D7_0707600	PF3D7_0707600.1	MED10	57	S	Curated	Phosphorylation
PF3D7_0805700	PF3D7_0805700.1	FIKK8	671	S	Curated	Phosphorylation
PF3D7_0726500	PF3D7_0726500.1	N/A	1368	S	Curated	Phosphorylation
PF3D7_0617200	PF3D7_0617200.1	N/A	203	S	Curated	Phosphorylation
PF3D7_1425400	PF3D7_1425400.1	N/A	555	S	Curated	Phosphorylation
PF3D7_0317700	PF3D7_0317700.1	N/A	1740	S	Curated	Phosphorylation
PF3D7_1023900	PF3D7_1023900.1	CHD1	3103	T	Curated	Phosphorylation
PF3D7_1203700	PF3D7_1203700.1	NAPL	237	S	Curated	Phosphorylation
PF3D7_0907700	PF3D7_0907700.1	PA28	104	S	Curated	Phosphorylation
PF3D7_1245100	PF3D7_1245100.1	KLP8	738	S	Curated	Phosphorylation
PF3D7_1455300	PF3D7_1455300.1	N/A	19	T	Curated	Phosphorylation
PF3D7_0932000	PF3D7_0932000.1	N/A	35	S	Curated	Phosphorylation
PF3D7_1339700	PF3D7_1339700.1	N/A	1567	S	Curated	Phosphorylation
PF3D7_1308400	PF3D7_1308400.1	N/A	1678	S	Curated	Phosphorylation
PF3D7_1343000	PF3D7_1343000.1	PMT	2	T	Curated	Phosphorylation
PF3D7_1021700	PF3D7_1021700.1	N/A	5300	S	Curated	Phosphorylation
PF3D7_1230800	PF3D7_1230800.1	WTAP	246	S	Curated	Phosphorylation
PF3D7_0628100	PF3D7_0628100.1	HECT1	8997	S	Curated	Phosphorylation
PF3D7_0622800	PF3D7_0622800.1	N/A	125	S	Curated	Phosphorylation
PF3D7_1462900	PF3D7_1462900.1	N/A	115	S	Curated	Phosphorylation
PF3D7_0902000	PF3D7_0902000.1	FIKK9.1	66	T	Curated	Phosphorylation
PF3D7_0506900	PF3D7_0506900.1	ROM4	94	S	Curated	Phosphorylation
PF3D7_1107800	PF3D7_1107800.1	ApiAP2	1604	S	Curated	Phosphorylation
PF3D7_1308900	PF3D7_1308900.1	DCP2	884	Y	Curated	Phosphorylation
PF3D7_1315900	PF3D7_1315900.1	N/A	553	S	Curated	Phosphorylation
PF3D7_1435600	PF3D7_1435600.1	N/A	578	S	Curated	Phosphorylation
PF3D7_1224300	PF3D7_1224300.1	PABP1	56	S	Curated	Phosphorylation
PF3D7_0730500	PF3D7_0730500.1	N/A	1237	S	Curated	Phosphorylation
PF3D7_0601600	PF3D7_0601600.1	N/A	284	S	Curated	Phosphorylation
PF3D7_1120000	PF3D7_1120000.1	N/A	100	T	Curated	Phosphorylation
PF3D7_1123100	PF3D7_1123100.1	CDPK7	844	S	Curated	Phosphorylation
PF3D7_0726500	PF3D7_0726500.1	N/A	2344	S	Curated	Phosphorylation
PF3D7_0202000	PF3D7_0202000.1	KAHRP	506	T	Curated	Phosphorylation
PF3D7_1138700	PF3D7_1138700.1	KIC5	101	T	Curated	Phosphorylation
PF3D7_0806800	PF3D7_0806800.1	N/A	816	S	Curated	Phosphorylation
PF3D7_0217500	PF3D7_0217500.1	CDPK1	64	S	Curated	Phosphorylation
PF3D7_0801000	PF3D7_0801000.1	N/A	158	S	Curated	Phosphorylation
PF3D7_1228400	PF3D7_1228400.1	N/A	1096	S	Curated	Phosphorylation
PF3D7_1239200	PF3D7_1239200.1	ApiAP2	1941	S	Curated	Phosphorylation
PF3D7_0513600	PF3D7_0513600.1	N/A	297	S	Curated	Phosphorylation
PF3D7_0726500	PF3D7_0726500.1	N/A	2351	T	Curated	Phosphorylation
PF3D7_1003600	PF3D7_1003600.1	IMC1c	7	S	Curated	Phosphorylation
PF3D7_0311100	PF3D7_0311100.1	N/A	308	S	Curated	Phosphorylation
PF3D7_1014900	PF3D7_1014900.1	KIC8	2014	S	Curated	Phosphorylation
PF3D7_1435300	PF3D7_1435300.1	N/A	2164	S	Curated	Phosphorylation
PF3D7_0207600	PF3D7_0207600.1	SERA5	192	S	Curated	Phosphorylation
PF3D7_1233600	PF3D7_1233600.1	AARP1	3176	S	Curated	Phosphorylation
PF3D7_0526200	PF3D7_0526200.1	ARFGAP2	461	S	Curated	Phosphorylation
PF3D7_1308400	PF3D7_1308400.1	N/A	803	S	Curated	Phosphorylation
PF3D7_1364400	PF3D7_1364400.1	N/A	2032	S	Curated	Phosphorylation
PF3D7_1246300	PF3D7_1246300.1	KIC4	360	S	Curated	Phosphorylation
PF3D7_1468100	PF3D7_1468100.1	MORC	2539	S	Curated	Phosphorylation
PF3D7_1301600	PF3D7_1301600.1	EBA140	84	S	Curated	Phosphorylation
PF3D7_0707700	PF3D7_0707700.1	N/A	653	S	Curated	Phosphorylation
PF3D7_1459600	PF3D7_1459600.1	N/A	796	S	Curated	Phosphorylation
PF3D7_1417700	PF3D7_1417700.1	N/A	129	T	Curated	Phosphorylation
PF3D7_1345400	PF3D7_1345400.1	N/A	1099	S	Curated	Phosphorylation
PF3D7_1004400	PF3D7_1004400.1	N/A	465	S	Curated	Phosphorylation
PF3D7_1036900	PF3D7_1036900.1	N/A	1441	S	Curated	Phosphorylation
PF3D7_0504800	PF3D7_0504800.1	N/A	1550	S	Curated	Phosphorylation
PF3D7_0704800	PF3D7_0704800.1	PPM12	494	S	Curated	Phosphorylation
PF3D7_1327300	PF3D7_1327300.1	N/A	1708	S	Curated	Phosphorylation
PF3D7_1142300	PF3D7_1142300.1	N/A	268	S	Curated	Phosphorylation
PF3D7_1430300	PF3D7_1430300.1	N/A	2397	S	Curated	Phosphorylation
PF3D7_1019100	PF3D7_1019100.1	N/A	1333	S	Curated	Phosphorylation
PF3D7_0319000	PF3D7_0319000.1	ATPase7	1335	S	Curated	Phosphorylation
PF3D7_0605100	PF3D7_0605100.1	KH1	22	S	Curated	Phosphorylation
PF3D7_1146600	PF3D7_1146600.1	ORP1	159	S	Curated	Phosphorylation
PF3D7_0728000	PF3D7_0728000.1	eIF2alpha	85	S	Curated	Phosphorylation
PF3D7_1340900	PF3D7_1340900.1	PiT	625	S	Curated	Phosphorylation
PF3D7_1467900	PF3D7_1467900.1	N/A	959	S	Curated	Phosphorylation
PF3D7_1414300	PF3D7_1414300.1	N/A	104	S	Curated	Phosphorylation
PF3D7_1241500	PF3D7_1241500.1	N/A	212	S	Curated	Phosphorylation
PF3D7_1004400	PF3D7_1004400.1	N/A	5	S	Curated	Phosphorylation
PF3D7_0814200	PF3D7_0814200.1	ALBA1	22	T	Curated	Phosphorylation
PF3D7_0704200	PF3D7_0704200.1	NSUN1	684	S	Curated	Phosphorylation
PF3D7_1319100	PF3D7_1319100.1	N/A	399	S	Curated	Phosphorylation
PF3D7_1332200	PF3D7_1332200.1	N/A	948	S	Curated	Phosphorylation
PF3D7_1416200	PF3D7_1416200.1	MCA3	720	S	Curated	Phosphorylation
PF3D7_1036900	PF3D7_1036900.1	N/A	805	S	Curated	Phosphorylation
PF3D7_0522400	PF3D7_0522400.1	N/A	8238	S	Curated	Phosphorylation
PF3D7_0613800	PF3D7_0613800.1	ApiAP2	761	S	Curated	Phosphorylation
PF3D7_1141800	PF3D7_1141800.1	N/A	65	Y	Curated	Phosphorylation
PF3D7_1250200	PF3D7_1250200.1	N/A	391	S	Curated	Phosphorylation
PF3D7_0401800	PF3D7_0401800.1	PfD80	82	S	Curated	Phosphorylation
PF3D7_0614300	PF3D7_0614300.1	MFR1	417	S	Curated	Phosphorylation
PF3D7_1430300	PF3D7_1430300.1	N/A	1239	S	Curated	Phosphorylation
PF3D7_0933000	PF3D7_0933000.1	N/A	416	S	Curated	Phosphorylation
PF3D7_1436600	PF3D7_1436600.1	PKG	817	S	Curated	Phosphorylation
PF3D7_0312400	PF3D7_0312400.1	GSK3	229	Y	Curated	Phosphorylation
PF3D7_1020700	PF3D7_1020700.1	N/A	219	S	Curated	Phosphorylation
PF3D7_0529400	PF3D7_0529400.1	N/A	736	S	Curated	Phosphorylation
PF3D7_0717700	PF3D7_0717700.1	N/A	267	T	Curated	Phosphorylation
PF3D7_1001600	PF3D7_1001600.1	XL2	310	S	Curated	Phosphorylation
PF3D7_1025900	PF3D7_1025900.1	N/A	309	S	Curated	Phosphorylation
PF3D7_0616900	PF3D7_0616900.1	N/A	1024	S	Curated	Phosphorylation
PF3D7_0621100	PF3D7_0621100.1	N/A	169	S	Curated	Phosphorylation
PF3D7_0731100	PF3D7_0731100.1	PTP2	137	S	Curated	Phosphorylation
PF3D7_1317100	PF3D7_1317100.1	MCM4	80	T	Curated	Phosphorylation
PF3D7_0729100	PF3D7_0729100.1	N/A	1089	Y	Curated	Phosphorylation
PF3D7_1448300	PF3D7_1448300.1	N/A	1322	S	Curated	Phosphorylation
PF3D7_0628100	PF3D7_0628100.1	HECT1	8967	Y	Curated	Phosphorylation
PF3D7_1417200	PF3D7_1417200.1	NOT1	1039	S	Curated	Phosphorylation
PF3D7_0506800	PF3D7_0506800.1	TCF25	133	S	Curated	Phosphorylation
PF3D7_0531100	PF3D7_0531100.1	N/A	920	S	Curated	Phosphorylation
PF3D7_0611600	PF3D7_0611600.1	BTP1	147	S	Curated	Phosphorylation
PF3D7_0923900	PF3D7_0923900.1	PABP2	130	S	Curated	Phosphorylation
PF3D7_1012000	PF3D7_1012000.1	N/A	628	T	Curated	Phosphorylation
PF3D7_1415000	PF3D7_1415000.1	UDG	314	T	Curated	Phosphorylation
PF3D7_0914400	PF3D7_0914400.1	KIC3	161	T	Curated	Phosphorylation
PF3D7_0714200	PF3D7_0714200.1	N/A	536	S	Curated	Phosphorylation
PF3D7_1231800	PF3D7_1231800.1	N/A	737	S	Curated	Phosphorylation
PF3D7_0813300	PF3D7_0813300.1	N/A	307	T	Curated	Phosphorylation
PF3D7_1464000	PF3D7_1464000.1	N/A	232	S	Curated	Phosphorylation
PF3D7_0110600	PF3D7_0110600.1	PIP5K	454	T	Curated	Phosphorylation
PF3D7_0610900	PF3D7_0610900.1	SPT5	614	S	Curated	Phosphorylation
PF3D7_0708400	PF3D7_0708400.1	HSP90	202	S	Curated	Phosphorylation
PF3D7_1456500	PF3D7_1456500.1	N/A	2278	S	Curated	Phosphorylation
PF3D7_0303500	PF3D7_0303500.1	N/A	2106	T	Curated	Phosphorylation
PF3D7_0505700	PF3D7_0505700.1	N/A	752	S	Curated	Phosphorylation
PF3D7_1003600	PF3D7_1003600.1	IMC1c	239	S	Curated	Phosphorylation
PF3D7_0511500	PF3D7_0511500.1	N/A	9206	S	Curated	Phosphorylation
PF3D7_0711400	PF3D7_0711400.1	SAP18	409	S	Curated	Phosphorylation
PF3D7_0305500	PF3D7_0305500.1	N/A	507	T	Curated	Phosphorylation
PF3D7_1304400	PF3D7_1304400.1	N/A	192	S	Curated	Phosphorylation
PF3D7_1206300	PF3D7_1206300.1	N/A	2661	S	Curated	Phosphorylation
PF3D7_1121100	PF3D7_1121100.1	N/A	219	S	Curated	Phosphorylation
PF3D7_0309300	PF3D7_0309300.1	N/A	676	T	Curated	Phosphorylation
PF3D7_1121100	PF3D7_1121100.1	N/A	208	S	Curated	Phosphorylation
PF3D7_0526200	PF3D7_0526200.1	ARFGAP2	354	S	Curated	Phosphorylation
PF3D7_0604500	PF3D7_0604500.1	N/A	2513	S	Curated	Phosphorylation
PF3D7_0513600	PF3D7_0513600.1	N/A	579	S	Curated	Phosphorylation
PF3D7_0724700	PF3D7_0724700.1	BDP6	1895	S	Curated	Phosphorylation
PF3D7_0907600	PF3D7_0907600.1	N/A	375	S	Curated	Phosphorylation
PF3D7_0529800	PF3D7_0529800.1	N/A	1459	S	Curated	Phosphorylation
PF3D7_1134300	PF3D7_1134300.1	EMMA1	1827	S	Curated	Phosphorylation
PF3D7_0321100	PF3D7_0321100.1	N/A	1055	S	Curated	Phosphorylation
PF3D7_0708400	PF3D7_0708400.1	HSP90	487	S	Curated	Phosphorylation
PF3D7_1445400	PF3D7_1445400.1	CLK1	158	S	Curated	Phosphorylation
PF3D7_0407800	PF3D7_0407800.1	CINCH	1662	T	Curated	Phosphorylation
PF3D7_1476300	PF3D7_1476300.1	N/A	73	S	Curated	Phosphorylation
PF3D7_0409800	PF3D7_0409800.1	N/A	411	T	Curated	Phosphorylation
PF3D7_0903500	PF3D7_0903500.1	NUP138	118	S	Curated	Phosphorylation
PF3D7_1230800	PF3D7_1230800.1	WTAP	300	S	Curated	Phosphorylation
PF3D7_1308200	PF3D7_1308200.1	cpsSII	1544	S	Curated	Phosphorylation
PF3D7_1227600	PF3D7_1227600.1	SPC24	95	S	Curated	Phosphorylation
PF3D7_1430300	PF3D7_1430300.1	N/A	2290	S	Curated	Phosphorylation
PF3D7_0614300	PF3D7_0614300.1	MFR1	439	S	Curated	Phosphorylation
PF3D7_1435600	PF3D7_1435600.1	N/A	227	S	Curated	Phosphorylation
PF3D7_1145200	PF3D7_1145200.1	N/A	773	S	Curated	Phosphorylation
PF3D7_0813100	PF3D7_0813100.1	N/A	521	S	Curated	Phosphorylation
PF3D7_0628100	PF3D7_0628100.1	HECT1	3597	S	Curated	Phosphorylation
PF3D7_0401800	PF3D7_0401800.1	PfD80	81	T	Curated	Phosphorylation
PF3D7_1442700	PF3D7_1442700.1	N/A	2283	S	Curated	Phosphorylation
PF3D7_0108300	PF3D7_0108300.1	ARP	1493	T	Curated	Phosphorylation
PF3D7_1228800	PF3D7_1228800.1	N/A	2627	S	Curated	Phosphorylation
PF3D7_1107800	PF3D7_1107800.1	ApiAP2	1039	S	Curated	Phosphorylation
PF3D7_0202000	PF3D7_0202000.1	KAHRP	345	S	Curated	Phosphorylation
PF3D7_0210900	PF3D7_0210900.1	N/A	109	T	Curated	Phosphorylation
PF3D7_0820000	PF3D7_0820000.1	SRCAP	533	S	Curated	Phosphorylation
PF3D7_1455500	PF3D7_1455500.1	N/A	322	S	Curated	Phosphorylation
PF3D7_0714500	PF3D7_0714500.1	N/A	322	S	Curated	Phosphorylation
PF3D7_0602000	PF3D7_0602000.1	N/A	531	S	Curated	Phosphorylation
PF3D7_1004400	PF3D7_1004400.1	N/A	793	S	Curated	Phosphorylation
PF3D7_1138500	PF3D7_1138500.1	PPM2	294	S	Curated	Phosphorylation
PF3D7_1008000	PF3D7_1008000.1	HDA2	1775	T	Curated	Phosphorylation
PF3D7_1237900	PF3D7_1237900.1	N/A	316	S	Curated	Phosphorylation
PF3D7_1121300	PF3D7_1121300.1	TKL2	634	S	Curated	Phosphorylation
PF3D7_0310900	PF3D7_0310900.1	N/A	404	S	Curated	Phosphorylation
PF3D7_1017500	PF3D7_1017500.1	ELC	131	T	Curated	Phosphorylation
PF3D7_0618000	PF3D7_0618000.1	N/A	46	T	Curated	Phosphorylation
PF3D7_1455300	PF3D7_1455300.1	N/A	544	T	Curated	Phosphorylation
PF3D7_0904600	PF3D7_0904600.1	N/A	1018	S	Curated	Phosphorylation
PF3D7_0309000	PF3D7_0309000.1	YVH1	295	S	Curated	Phosphorylation
PF3D7_0610900	PF3D7_0610900.1	SPT5	879	S	Curated	Phosphorylation
PF3D7_0203000	PF3D7_0203000.1	ROPE	673	S	Curated	Phosphorylation
PF3D7_1031400	PF3D7_1031400.1	OTU	298	S	Curated	Phosphorylation
PF3D7_0605500	PF3D7_0605500.1	N/A	293	Y	Curated	Phosphorylation
PF3D7_1142100	PF3D7_1142100.1	N/A	309	T	Curated	Phosphorylation
PF3D7_0614300	PF3D7_0614300.1	MFR1	300	T	Curated	Phosphorylation
PF3D7_0802000	PF3D7_0802000.1	GDH3	1205	S	Curated	Phosphorylation
PF3D7_0104800	PF3D7_0104800.1	NPT1	261	S	Curated	Phosphorylation
PF3D7_1030200	PF3D7_1030200.1	CLAMP	440	S	Curated	Phosphorylation
PF3D7_1437900	PF3D7_1437900.1	HSP40	380	S	Curated	Phosphorylation
PF3D7_0615800	PF3D7_0615800.1	COG4	298	S	Curated	Phosphorylation
PF3D7_0922100	PF3D7_0922100.1	N/A	583	T	Curated	Phosphorylation
PF3D7_1345600	PF3D7_1345600.1	N/A	210	T	Curated	Phosphorylation
PF3D7_1145400	PF3D7_1145400.1	DYN1	572	S	Curated	Phosphorylation
PF3D7_1310700	PF3D7_1310700.1	PIC5	18	S	Curated	Phosphorylation
PF3D7_1249300	PF3D7_1249300.1	PPM4	62	S	Curated	Phosphorylation
PF3D7_0824800	PF3D7_0824800.1	N/A	638	S	Curated	Phosphorylation
PF3D7_0521700	PF3D7_0521700.1	DDX1	297	S	Curated	Phosphorylation
PF3D7_1464500	PF3D7_1464500.1	N/A	2837	T	Curated	Phosphorylation
PF3D7_1452600	PF3D7_1452600.1	N/A	1584	S	Curated	Phosphorylation
PF3D7_1457900	PF3D7_1457900.1	N/A	1293	S	Curated	Phosphorylation
PF3D7_0704300	PF3D7_0704300.1	N/A	869	S	Curated	Phosphorylation
PF3D7_0528100	PF3D7_0528100.1	N/A	652	S	Curated	Phosphorylation
PF3D7_1123100	PF3D7_1123100.1	CDPK7	1592	T	Curated	Phosphorylation
PF3D7_0604500	PF3D7_0604500.1	N/A	2403	S	Curated	Phosphorylation
PF3D7_1325400	PF3D7_1325400.1	N/A	445	S	Curated	Phosphorylation
PF3D7_1325400	PF3D7_1325400.1	N/A	1269	S	Curated	Phosphorylation
PF3D7_0706500	PF3D7_0706500.1	N/A	728	S	Curated	Phosphorylation
PF3D7_1452600	PF3D7_1452600.1	N/A	1480	Y	Curated	Phosphorylation
PF3D7_0618600	PF3D7_0618600.1	ROM10	5	T	Curated	Phosphorylation
PF3D7_1303800	PF3D7_1303800.1	N/A	786	S	Curated	Phosphorylation
PF3D7_0410800	PF3D7_0410800.1	N/A	194	S	Curated	Phosphorylation
PF3D7_1343100	PF3D7_1343100.1	N/A	89	S	Curated	Phosphorylation
PF3D7_0305500	PF3D7_0305500.1	N/A	421	S	Curated	Phosphorylation
PF3D7_1249300	PF3D7_1249300.1	PPM4	168	S	Curated	Phosphorylation
PF3D7_0619400	PF3D7_0619400.1	N/A	355	S	Curated	Phosphorylation
PF3D7_1316100	PF3D7_1316100.1	IPK2	111	S	Curated	Phosphorylation
PF3D7_0606000	PF3D7_0606000.1	KIC1	247	S	Curated	Phosphorylation
PF3D7_1365000	PF3D7_1365000.1	N/A	183	S	Curated	Phosphorylation
PF3D7_0818900	PF3D7_0818900.1	HSP70	90	T	Curated	Phosphorylation
PF3D7_1225700	PF3D7_1225700.1	N/A	706	S	Curated	Phosphorylation
PF3D7_0110600	PF3D7_0110600.1	PIP5K	1326	S	Curated	Phosphorylation
PF3D7_0910300	PF3D7_0910300.1	N/A	431	S	Curated	Phosphorylation
PF3D7_0105700	PF3D7_0105700.1	N/A	2710	T	Curated	Phosphorylation
PF3D7_0904100	PF3D7_0904100.1	N/A	1162	S	Curated	Phosphorylation
PF3D7_1442400	PF3D7_1442400.1	KIC9	1575	S	Curated	Phosphorylation
PF3D7_0602600	PF3D7_0602600.1	N/A	436	S	Curated	Phosphorylation
PF3D7_1312900	PF3D7_1312900.1	EIF4G	336	S	Curated	Phosphorylation
PF3D7_1143100	PF3D7_1143100.1	AP2-O	198	S	Curated	Phosphorylation
PF3D7_1121100	PF3D7_1121100.1	N/A	418	S	Curated	Phosphorylation
PF3D7_1241200	PF3D7_1241200.1	N/A	588	S	Curated	Phosphorylation
PF3D7_0510100	PF3D7_0510100.1	N/A	373	S	Curated	Phosphorylation
PF3D7_1116100	PF3D7_1116100.1	N/A	414	T	Curated	Phosphorylation
PF3D7_0811500	PF3D7_0811500.1	CARM1	247	S	Curated	Phosphorylation
PF3D7_1428800	PF3D7_1428800.1	N/A	175	S	Curated	Phosphorylation
PF3D7_0609100	PF3D7_0609100.1	ZIP1	134	T	Curated	Phosphorylation
PF3D7_0903400	PF3D7_0903400.1	DDX60	1175	S	Curated	Phosphorylation
PF3D7_0704100	PF3D7_0704100.1	BTP2	662	S	Curated	Phosphorylation
PF3D7_0802600	PF3D7_0802600.1	ACbeta	7	S	Curated	Phosphorylation
PF3D7_1228800	PF3D7_1228800.1	N/A	1944	S	Curated	Phosphorylation
PF3D7_0818200	PF3D7_0818200.1	14-3-3I	76	S	Curated	Phosphorylation
PF3D7_1149000	PF3D7_1149000.1	Pf332	803	S	Curated	Phosphorylation
PF3D7_1435500	PF3D7_1435500.1	CLC	117	S	Curated	Phosphorylation
PF3D7_1004400	PF3D7_1004400.1	N/A	685	S	Curated	Phosphorylation
PF3D7_1211900	PF3D7_1211900.1	ATP4	113	S	Curated	Phosphorylation
PF3D7_0505000	PF3D7_0505000.1	N/A	866	S	Curated	Phosphorylation
PF3D7_1435600	PF3D7_1435600.1	N/A	794	S	Curated	Phosphorylation
PF3D7_1353300	PF3D7_1353300.1	N/A	1954	S	Curated	Phosphorylation
PF3D7_0903500	PF3D7_0903500.1	NUP138	964	S	Curated	Phosphorylation
PF3D7_0624600	PF3D7_0624600.1	ISWI	2326	S	Curated	Phosphorylation
PF3D7_0320000	PF3D7_0320000.1	I2	15	S	Curated	Phosphorylation
PF3D7_1456500	PF3D7_1456500.1	N/A	2298	S	Curated	Phosphorylation
PF3D7_0615400	PF3D7_0615400.1	N/A	1596	S	Curated	Phosphorylation
PF3D7_0214800	PF3D7_0214800.1	N/A	934	T	Curated	Phosphorylation
PF3D7_1442900	PF3D7_1442900.1	ARFGEF	1396	S	Curated	Phosphorylation
PF3D7_0504800	PF3D7_0504800.1	N/A	3533	S	Curated	Phosphorylation
PF3D7_1136700	PF3D7_1136700.1	AIP	101	S	Curated	Phosphorylation
PF3D7_0305500	PF3D7_0305500.1	N/A	593	S	Curated	Phosphorylation
PF3D7_1457900	PF3D7_1457900.1	N/A	194	S	Curated	Phosphorylation
PF3D7_1105800	PF3D7_1105800.1	N/A	59	S	Curated	Phosphorylation
PF3D7_1467900	PF3D7_1467900.1	N/A	1101	S	Curated	Phosphorylation
PF3D7_1467900	PF3D7_1467900.1	N/A	322	T	Curated	Phosphorylation
PF3D7_0930600	PF3D7_0930600.1	CYP72	597	S	Curated	Phosphorylation
PF3D7_1345600	PF3D7_1345600.1	N/A	173	S	Curated	Phosphorylation
PF3D7_0704600	PF3D7_0704600.1	UT	1494	S	Curated	Phosphorylation
PF3D7_1142100	PF3D7_1142100.1	N/A	542	S	Curated	Phosphorylation
PF3D7_1359600	PF3D7_1359600.1	N/A	1582	S	Curated	Phosphorylation
PF3D7_1206200	PF3D7_1206200.1	EIF3C	21	S	Curated	Phosphorylation
PF3D7_1445400	PF3D7_1445400.1	CLK1	436	S	Curated	Phosphorylation
PF3D7_1357100	PF3D7_1357100.1	N/A	213	T	Curated	Phosphorylation
PF3D7_0317300	PF3D7_0317300.1	N/A	568	S	Curated	Phosphorylation
PF3D7_0615400	PF3D7_0615400.1	N/A	1806	S	Curated	Phosphorylation
PF3D7_0219600	PF3D7_0219600.1	RFC1	315	T	Curated	Phosphorylation
PF3D7_1351700	PF3D7_1351700.1	IMC1f	897	S	Curated	Phosphorylation
PF3D7_0511500	PF3D7_0511500.1	N/A	9809	S	Curated	Phosphorylation
PF3D7_0926100	PF3D7_0926100.1	N/A	195	S	Curated	Phosphorylation
PF3D7_0529800	PF3D7_0529800.1	N/A	1479	S	Curated	Phosphorylation
PF3D7_1417700	PF3D7_1417700.1	N/A	147	S	Curated	Phosphorylation
PF3D7_1429900	PF3D7_1429900.1	WRN	805	S	Curated	Phosphorylation
PF3D7_1110400	PF3D7_1110400.1	N/A	1325	S	Curated	Phosphorylation
PF3D7_0826500	PF3D7_0826500.1	UBE4B	745	S	Curated	Phosphorylation
PF3D7_0919000	PF3D7_0919000.1	NAPS	170	T	Curated	Phosphorylation
PF3D7_0504000	PF3D7_0504000.1	ATPase3	329	S	Curated	Phosphorylation
PF3D7_1005500	PF3D7_1005500.1	UPF1	39	S	Curated	Phosphorylation
PF3D7_0214300	PF3D7_0214300.1	N/A	1141	S	Curated	Phosphorylation
PF3D7_0924400	PF3D7_0924400.1	N/A	824	S	Curated	Phosphorylation
PF3D7_1027800	PF3D7_1027800.1	RPL3	352	S	Curated	Phosphorylation
PF3D7_1326500	PF3D7_1326500.1	N/A	1462	S	Curated	Phosphorylation
PF3D7_0614300	PF3D7_0614300.1	MFR1	421	T	Curated	Phosphorylation
PF3D7_1149000	PF3D7_1149000.1	Pf332	2529	S	Curated	Phosphorylation
PF3D7_1023900	PF3D7_1023900.1	CHD1	2932	S	Curated	Phosphorylation
PF3D7_1112100	PF3D7_1112100.1	N/A	233	S	Curated	Phosphorylation
PF3D7_1107800	PF3D7_1107800.1	ApiAP2	1810	S	Curated	Phosphorylation
PF3D7_1020900	PF3D7_1020900.1	ARF1	158	T	Curated	Phosphorylation
PF3D7_1312800	PF3D7_1312800.1	AAP2	2098	S	Curated	Phosphorylation
PF3D7_1468100	PF3D7_1468100.1	MORC	1897	S	Curated	Phosphorylation
PF3D7_1032100	PF3D7_1032100.1	DCP1	846	S	Curated	Phosphorylation
PF3D7_0823300	PF3D7_0823300.1	GCN5	878	S	Curated	Phosphorylation
PF3D7_1349300	PF3D7_1349300.1	TKL3	339	S	Curated	Phosphorylation
PF3D7_1333600	PF3D7_1333600.1	UTP4	240	T	Curated	Phosphorylation
PF3D7_0506900	PF3D7_0506900.1	ROM4	266	T	Curated	Phosphorylation
PF3D7_0729100	PF3D7_0729100.1	N/A	1073	S	Curated	Phosphorylation
PF3D7_0303500	PF3D7_0303500.1	N/A	1965	S	Curated	Phosphorylation
PF3D7_1223100	PF3D7_1223100.1	PKAr	83	S	Curated	Phosphorylation
PF3D7_0214100	PF3D7_0214100.1	SEC31	1225	S	Curated	Phosphorylation
PF3D7_1030200	PF3D7_1030200.1	CLAMP	300	S	Curated	Phosphorylation
PF3D7_1233600	PF3D7_1233600.1	AARP1	2356	S	Curated	Phosphorylation
PF3D7_1001600	PF3D7_1001600.1	XL2	323	T	Curated	Phosphorylation
PF3D7_1408700	PF3D7_1408700.1	N/A	3039	S	Curated	Phosphorylation
PF3D7_0801700	PF3D7_0801700.1	SENP2	1401	S	Curated	Phosphorylation
PF3D7_1312900	PF3D7_1312900.1	EIF4G	884	T	Curated	Phosphorylation
PF3D7_1036900	PF3D7_1036900.1	N/A	37	S	Curated	Phosphorylation
PF3D7_1241200	PF3D7_1241200.1	N/A	727	S	Curated	Phosphorylation
PF3D7_1467600	PF3D7_1467600.1	N/A	2083	S	Curated	Phosphorylation
PF3D7_1361100	PF3D7_1361100.1	SEC24A	131	S	Curated	Phosphorylation
PF3D7_1343300	PF3D7_1343300.1	N/A	792	S	Curated	Phosphorylation
PF3D7_0308100	PF3D7_0308100.1	N/A	1096	S	Curated	Phosphorylation
PF3D7_1467900	PF3D7_1467900.1	N/A	208	S	Curated	Phosphorylation
PF3D7_1369700	PF3D7_1369700.1	SNRPA1	175	S	Curated	Phosphorylation
PF3D7_0914700	PF3D7_0914700.1	MFR4	293	S	Curated	Phosphorylation
PF3D7_0905800	PF3D7_0905800.1	N/A	828	S	Curated	Phosphorylation
PF3D7_1308400	PF3D7_1308400.1	N/A	809	S	Curated	Phosphorylation
PF3D7_0629700	PF3D7_0629700.1	SET1	266	S	Curated	Phosphorylation
PF3D7_0914700	PF3D7_0914700.1	MFR4	255	S	Curated	Phosphorylation
PF3D7_0629500	PF3D7_0629500.1	AAT1	128	S	Curated	Phosphorylation
PF3D7_1451200	PF3D7_1451200.1	N/A	152	S	Curated	Phosphorylation
PF3D7_0411300	PF3D7_0411300.1	N/A	402	S	Curated	Phosphorylation
PF3D7_1114700	PF3D7_1114700.1	CLK3	109	T	Curated	Phosphorylation
PF3D7_0914900	PF3D7_0914900.1	N/A	524	S	Curated	Phosphorylation
PF3D7_1238500	PF3D7_1238500.1	N/A	552	S	Curated	Phosphorylation
PF3D7_0904600	PF3D7_0904600.1	N/A	1509	S	Curated	Phosphorylation
PF3D7_0504800	PF3D7_0504800.1	N/A	382	S	Curated	Phosphorylation
PF3D7_0302100	PF3D7_0302100.1	SRPK1	576	S	Curated	Phosphorylation
PF3D7_0618000	PF3D7_0618000.1	N/A	101	S	Curated	Phosphorylation
PF3D7_1228800	PF3D7_1228800.1	N/A	973	S	Curated	Phosphorylation
PF3D7_0420300	PF3D7_0420300.1	ApiAP2	2503	S	Curated	Phosphorylation
PF3D7_0218100	PF3D7_0218100.1	N/A	51	S	Curated	Phosphorylation
PF3D7_0604500	PF3D7_0604500.1	N/A	813	S	Curated	Phosphorylation
PF3D7_1249800	PF3D7_1249800.1	THO2	1379	S	Curated	Phosphorylation
PF3D7_1026600	PF3D7_1026600.1	N/A	263	S	Curated	Phosphorylation
PF3D7_0504800	PF3D7_0504800.1	N/A	1098	S	Curated	Phosphorylation
PF3D7_1245100	PF3D7_1245100.1	KLP8	930	S	Curated	Phosphorylation
PF3D7_1227800	PF3D7_1227800.1	ELP3	61	S	Curated	Phosphorylation
PF3D7_0717200	PF3D7_0717200.1	N/A	424	S	Curated	Phosphorylation
PF3D7_1021700	PF3D7_1021700.1	N/A	3231	S	Curated	Phosphorylation
PF3D7_0729100	PF3D7_0729100.1	N/A	2074	S	Curated	Phosphorylation
PF3D7_0813200	PF3D7_0813200.1	N/A	264	T	Curated	Phosphorylation
PF3D7_1013900	PF3D7_1013900.1	N/A	953	S	Curated	Phosphorylation
PF3D7_1343700	PF3D7_1343700.1	Kelch13	97	S	Curated	Phosphorylation
PF3D7_1457900	PF3D7_1457900.1	N/A	2826	S	Curated	Phosphorylation
PF3D7_1104200	PF3D7_1104200.1	SNF2L	92	S	Curated	Phosphorylation
PF3D7_0501400	PF3D7_0501400.1	FIRA	1669	S	Curated	Phosphorylation
PF3D7_1034500	PF3D7_1034500.1	N/A	380	S	Curated	Phosphorylation
PF3D7_0703900	PF3D7_0703900.1	N/A	3005	T	Curated	Phosphorylation
PF3D7_1443100	PF3D7_1443100.1	N/A	345	T	Curated	Phosphorylation
PF3D7_1438000	PF3D7_1438000.1	N/A	608	T	Curated	Phosphorylation
PF3D7_1003600	PF3D7_1003600.1	IMC1c	220	S	Curated	Phosphorylation
PF3D7_1008700	PF3D7_1008700.1	N/A	275	S	Curated	Phosphorylation
PF3D7_0812100	PF3D7_0812100.1	N/A	1318	S	Curated	Phosphorylation
PF3D7_0526200	PF3D7_0526200.1	ARFGAP2	353	S	Curated	Phosphorylation
PF3D7_1211700	PF3D7_1211700.1	MCM5	93	S	Curated	Phosphorylation
PF3D7_0308300	PF3D7_0308300.1	PIC4	57	T	Curated	Phosphorylation
PF3D7_1356800	PF3D7_1356800.1	ARK3	3870	S	Curated	Phosphorylation
PF3D7_1212700	PF3D7_1212700.1	EIF3A	1044	S	Curated	Phosphorylation
PF3D7_1207000	PF3D7_1207000.1	N/A	225	S	Curated	Phosphorylation
PF3D7_1110400	PF3D7_1110400.1	N/A	435	S	Curated	Phosphorylation
PF3D7_1139300	PF3D7_1139300.1	AP2-G5	1972	S	Curated	Phosphorylation
PF3D7_0826700	PF3D7_0826700.1	RACK1	21	S	Curated	Phosphorylation
PF3D7_1468100	PF3D7_1468100.1	MORC	222	S	Curated	Phosphorylation
PF3D7_0714200	PF3D7_0714200.1	N/A	334	S	Curated	Phosphorylation
PF3D7_0729100	PF3D7_0729100.1	N/A	664	S	Curated	Phosphorylation
PF3D7_0625200	PF3D7_0625200.1	N/A	123	S	Curated	Phosphorylation
PF3D7_0305500	PF3D7_0305500.1	N/A	3617	S	Curated	Phosphorylation
PF3D7_0321100	PF3D7_0321100.1	N/A	361	T	Curated	Phosphorylation
PF3D7_0723300	PF3D7_0723300.1	N/A	676	T	Curated	Phosphorylation
PF3D7_1209300	PF3D7_1209300.1	TRZ	947	S	Curated	Phosphorylation
PF3D7_1241200	PF3D7_1241200.1	N/A	1361	S	Curated	Phosphorylation
PF3D7_0518500	PF3D7_0518500.1	DDX23	301	S	Curated	Phosphorylation
PF3D7_1429900	PF3D7_1429900.1	WRN	992	S	Curated	Phosphorylation
PF3D7_1321500	PF3D7_1321500.1	PDEbeta	115	T	Curated	Phosphorylation
PF3D7_1029400	PF3D7_1029400.1	CDC50C	481	S	Curated	Phosphorylation
PF3D7_1402800	PF3D7_1402800.1	N/A	727	S	Curated	Phosphorylation
PF3D7_0730500	PF3D7_0730500.1	N/A	1259	S	Curated	Phosphorylation
PF3D7_0423700	PF3D7_0423700.1	ETRAMP4	127	S	Curated	Phosphorylation
PF3D7_0617900	PF3D7_0617900.1	H3.3	34	T	Curated	Phosphorylation
PF3D7_0704100	PF3D7_0704100.1	BTP2	1529	S	Curated	Phosphorylation
PF3D7_0825000	PF3D7_0825000.1	N/A	1215	S	Curated	Phosphorylation
PF3D7_1313800	PF3D7_1313800.1	N/A	2378	S	Curated	Phosphorylation
PF3D7_1240000	PF3D7_1240000.1	N/A	540	S	Curated	Phosphorylation
PF3D7_1220300	PF3D7_1220300.1	N/A	352	Y	Curated	Phosphorylation
PF3D7_1464700	PF3D7_1464700.1	N/A	373	S	Curated	Phosphorylation
PF3D7_1207000	PF3D7_1207000.1	N/A	2066	Y	Curated	Phosphorylation
PF3D7_1449500	PF3D7_1449500.1	ApiAP2	39	Y	Curated	Phosphorylation
PF3D7_0933700	PF3D7_0933700.1	N/A	44	S	Curated	Phosphorylation
PF3D7_0405100	PF3D7_0405100.1	SEC24B	589	S	Curated	Phosphorylation
PF3D7_1359600	PF3D7_1359600.1	N/A	941	T	Curated	Phosphorylation
PF3D7_1021900	PF3D7_1021900.1	N/A	472	S	Curated	Phosphorylation
PF3D7_1021700	PF3D7_1021700.1	N/A	1921	T	Curated	Phosphorylation
PF3D7_0508900	PF3D7_0508900.1	AAP6	1573	S	Curated	Phosphorylation
PF3D7_1339700	PF3D7_1339700.1	N/A	1469	S	Curated	Phosphorylation
PF3D7_0801800	PF3D7_0801800.1	N/A	590	T	Curated	Phosphorylation
PF3D7_0108300	PF3D7_0108300.1	ARP	1217	S	Curated	Phosphorylation
PF3D7_1438400	PF3D7_1438400.1	MCA2	247	S	Curated	Phosphorylation
PF3D7_1107300	PF3D7_1107300.1	PAIP1	1022	Y	Curated	Phosphorylation
PF3D7_1147300	PF3D7_1147300.1	N/A	1192	S	Curated	Phosphorylation
PF3D7_1014600	PF3D7_1014600.1	ADA2	825	S	Curated	Phosphorylation
PF3D7_1124400	PF3D7_1124400.1	LSM1	117	S	Curated	Phosphorylation
PF3D7_0606000	PF3D7_0606000.1	KIC1	367	S	Curated	Phosphorylation
PF3D7_0926500	PF3D7_0926500.1	N/A	1341	S	Curated	Phosphorylation
PF3D7_1303500	PF3D7_1303500.1	NHE	987	S	Curated	Phosphorylation
PF3D7_1440100	PF3D7_1440100.1	N/A	19	S	Curated	Phosphorylation
PF3D7_0511500	PF3D7_0511500.1	N/A	8563	S	Curated	Phosphorylation
PF3D7_0824800	PF3D7_0824800.1	N/A	81	S	Curated	Phosphorylation
PF3D7_0616200	PF3D7_0616200.1	NDC80	26	S	Curated	Phosphorylation
PF3D7_0517400	PF3D7_0517400.1	FACT-L	566	S	Curated	Phosphorylation
PF3D7_1417200	PF3D7_1417200.1	NOT1	1071	S	Curated	Phosphorylation
PF3D7_0506900	PF3D7_0506900.1	ROM4	281	T	Curated	Phosphorylation
PF3D7_0702500	PF3D7_0702500.1	N/A	196	S	Curated	Phosphorylation
PF3D7_1302000	PF3D7_1302000.1	PTP6	302	S	Curated	Phosphorylation
PF3D7_1362700	PF3D7_1362700.1	N/A	1056	S	Curated	Phosphorylation
PF3D7_1134300	PF3D7_1134300.1	EMMA1	855	S	Curated	Phosphorylation
PF3D7_1468100	PF3D7_1468100.1	MORC	22	S	Curated	Phosphorylation
PF3D7_1141300	PF3D7_1141300.1	APR1	291	S	Curated	Phosphorylation
PF3D7_1343800	PF3D7_1343800.1	N/A	2397	S	Curated	Phosphorylation
PF3D7_1453200	PF3D7_1453200.1	N/A	657	S	Curated	Phosphorylation
PF3D7_1356800	PF3D7_1356800.1	ARK3	1793	T	Curated	Phosphorylation
PF3D7_1467100	PF3D7_1467100.1	MAG	357	S	Curated	Phosphorylation
PF3D7_1445900	PF3D7_1445900.1	DDX17	88	T	Curated	Phosphorylation
PF3D7_1027700	PF3D7_1027700.1	CEN3	23	S	Curated	Phosphorylation
PF3D7_1125500	PF3D7_1125500.1	SNRPD1	95	T	Curated	Phosphorylation
PF3D7_0407800	PF3D7_0407800.1	CINCH	339	S	Curated	Phosphorylation
PF3D7_1352400	PF3D7_1352400.1	N/A	520	S	Curated	Phosphorylation
PF3D7_0511500	PF3D7_0511500.1	N/A	9597	S	Curated	Phosphorylation
PF3D7_0308200	PF3D7_0308200.1	CCT7	2	S	Curated	Phosphorylation
PF3D7_1239800	PF3D7_1239800.1	N/A	2807	S	Curated	Phosphorylation
PF3D7_1467600	PF3D7_1467600.1	N/A	1516	S	Curated	Phosphorylation
PF3D7_1107300	PF3D7_1107300.1	PAIP1	1361	S	Curated	Phosphorylation
PF3D7_0108300	PF3D7_0108300.1	ARP	1214	T	Curated	Phosphorylation
PF3D7_0515700	PF3D7_0515700.1	GAP40	420	S	Curated	Phosphorylation
PF3D7_0630300	PF3D7_0630300.1	N/A	1329	T	Curated	Phosphorylation
PF3D7_1448000	PF3D7_1448000.1	UTP12	811	S	Curated	Phosphorylation
PF3D7_0525100	PF3D7_0525100.1	ACS10	378	S	Curated	Phosphorylation
PF3D7_0624600	PF3D7_0624600.1	ISWI	2324	S	Curated	Phosphorylation
PF3D7_0722200	PF3D7_0722200.1	RALP1	627	T	Curated	Phosphorylation
PF3D7_0914100	PF3D7_0914100.1	N/A	633	T	Curated	Phosphorylation
PF3D7_1036900	PF3D7_1036900.1	N/A	392	S	Curated	Phosphorylation
PF3D7_1423300	PF3D7_1423300.1	PP7	163	S	Curated	Phosphorylation
PF3D7_1117900	PF3D7_1117900.1	N/A	1414	S	Curated	Phosphorylation
PF3D7_1136700	PF3D7_1136700.1	AIP	92	T	Curated	Phosphorylation
PF3D7_1315900	PF3D7_1315900.1	N/A	385	S	Curated	Phosphorylation
PF3D7_0104300	PF3D7_0104300.1	UBP1	1567	S	Curated	Phosphorylation
PF3D7_1138700	PF3D7_1138700.1	KIC5	1203	S	Curated	Phosphorylation
PF3D7_1449500	PF3D7_1449500.1	ApiAP2	41	S	Curated	Phosphorylation
PF3D7_0726500	PF3D7_0726500.1	N/A	631	S	Curated	Phosphorylation
PF3D7_0813300	PF3D7_0813300.1	N/A	150	T	Curated	Phosphorylation
PF3D7_1428200	PF3D7_1428200.1	MFS5	412	T	Curated	Phosphorylation
PF3D7_0812500	PF3D7_0812500.1	N/A	255	S	Curated	Phosphorylation
PF3D7_1305000	PF3D7_1305000.1	N/A	567	S	Curated	Phosphorylation
PF3D7_0624600	PF3D7_0624600.1	ISWI	1598	S	Curated	Phosphorylation
PF3D7_1250200	PF3D7_1250200.1	N/A	631	S	Curated	Phosphorylation
PF3D7_1366900	PF3D7_1366900.1	N/A	162	S	Curated	Phosphorylation
PF3D7_1138500	PF3D7_1138500.1	PPM2	780	S	Curated	Phosphorylation
PF3D7_1014900	PF3D7_1014900.1	KIC8	919	T	Curated	Phosphorylation
PF3D7_1012000	PF3D7_1012000.1	N/A	712	S	Curated	Phosphorylation
PF3D7_0731300	PF3D7_0731300.1	PfG174	78	S	Curated	Phosphorylation
PF3D7_1036900	PF3D7_1036900.1	N/A	539	T	Curated	Phosphorylation
PF3D7_1362700	PF3D7_1362700.1	N/A	692	S	Curated	Phosphorylation
PF3D7_0420000	PF3D7_0420000.1	N/A	2807	S	Curated	Phosphorylation
PF3D7_0708400	PF3D7_0708400.1	HSP90	486	T	Curated	Phosphorylation
PF3D7_0508700	PF3D7_0508700.1	PRP5	699	S	Curated	Phosphorylation
PF3D7_1014900	PF3D7_1014900.1	KIC8	1430	S	Curated	Phosphorylation
PF3D7_0704100	PF3D7_0704100.1	BTP2	3270	Y	Curated	Phosphorylation
PF3D7_1036900	PF3D7_1036900.1	N/A	449	S	Curated	Phosphorylation
PF3D7_0302100	PF3D7_0302100.1	SRPK1	569	T	Curated	Phosphorylation
PF3D7_1408400	PF3D7_1408400.1	FANCJ	311	T	Curated	Phosphorylation
PF3D7_1473200	PF3D7_1473200.1	N/A	91	S	Curated	Phosphorylation
PF3D7_1445700	PF3D7_1445700.1	N/A	53	S	Curated	Phosphorylation
PF3D7_0606000	PF3D7_0606000.1	KIC1	735	S	Curated	Phosphorylation
PF3D7_0813300	PF3D7_0813300.1	N/A	245	S	Curated	Phosphorylation
PF3D7_1115800	PF3D7_1115800.1	N/A	245	S	Curated	Phosphorylation
PF3D7_0904900	PF3D7_0904900.1	CuTP	287	S	Curated	Phosphorylation
PF3D7_0606100	PF3D7_0606100.1	N/A	397	S	Curated	Phosphorylation
PF3D7_1405300	PF3D7_1405300.1	N/A	891	Y	Curated	Phosphorylation
PF3D7_1351700	PF3D7_1351700.1	IMC1f	38	S	Curated	Phosphorylation
PF3D7_0525100	PF3D7_0525100.1	ACS10	374	S	Curated	Phosphorylation
PF3D7_0814200	PF3D7_0814200.1	ALBA1	88	S	Curated	Phosphorylation
PF3D7_0830500	PF3D7_0830500.1	TryThrA	403	S	Curated	Phosphorylation
PF3D7_1466100	PF3D7_1466100.1	PPKL	451	S	Curated	Phosphorylation
PF3D7_1008500	PF3D7_1008500.1	N/A	528	S	Curated	Phosphorylation
PF3D7_1202900	PF3D7_1202900.1	HMGB1	28	Y	Curated	Phosphorylation
PF3D7_0723800	PF3D7_0723800.1	N/A	412	S	Curated	Phosphorylation
PF3D7_0932100	PF3D7_0932100.1	N/A	769	S	Curated	Phosphorylation
PF3D7_0318700	PF3D7_0318700.1	N/A	43	S	Curated	Phosphorylation
PF3D7_0530900	PF3D7_0530900.1	FRM1	1065	S	Curated	Phosphorylation
PF3D7_1142100	PF3D7_1142100.1	N/A	2310	S	Curated	Phosphorylation
PF3D7_0310300	PF3D7_0310300.1	N/A	469	S	Curated	Phosphorylation
PF3D7_0818000	PF3D7_0818000.1	SNRNP27	41	S	Curated	Phosphorylation
PF3D7_0103300	PF3D7_0103300.1	N/A	492	S	Curated	Phosphorylation
PF3D7_0615400	PF3D7_0615400.1	N/A	954	S	Curated	Phosphorylation
PF3D7_1110400	PF3D7_1110400.1	N/A	985	T	Curated	Phosphorylation
PF3D7_0405400	PF3D7_0405400.1	PRPF8	857	S	Curated	Phosphorylation
PF3D7_0207600	PF3D7_0207600.1	SERA5	866	S	Curated	Phosphorylation
PF3D7_0106300	PF3D7_0106300.1	ATP6	592	S	Curated	Phosphorylation
PF3D7_0110800	PF3D7_0110800.1	N/A	28	S	Curated	Phosphorylation
PF3D7_0822900	PF3D7_0822900.1	PIC2	1004	S	Curated	Phosphorylation
PF3D7_1248700	PF3D7_1248700.1	N/A	501	S	Curated	Phosphorylation
PF3D7_0717600	PF3D7_0717600.1	IMC32	444	S	Curated	Phosphorylation
PF3D7_0108300	PF3D7_0108300.1	ARP	1531	S	Curated	Phosphorylation
PF3D7_1241200	PF3D7_1241200.1	N/A	1451	S	Curated	Phosphorylation
PF3D7_1004400	PF3D7_1004400.1	N/A	508	S	Curated	Phosphorylation
PF3D7_1443600	PF3D7_1443600.1	N/A	929	S	Curated	Phosphorylation
PF3D7_0825000	PF3D7_0825000.1	N/A	448	S	Curated	Phosphorylation
PF3D7_0108800	PF3D7_0108800.1	N/A	135	S	Curated	Phosphorylation
PF3D7_1224500	PF3D7_1224500.1	ASF1	248	S	Curated	Phosphorylation
PF3D7_1328000	PF3D7_1328000.1	N/A	963	S	Curated	Phosphorylation
PF3D7_1359100	PF3D7_1359100.1	N/A	507	T	Curated	Phosphorylation
PF3D7_1116100	PF3D7_1116100.1	N/A	445	S	Curated	Phosphorylation
PF3D7_1467900	PF3D7_1467900.1	N/A	515	T	Curated	Phosphorylation
PF3D7_0714200	PF3D7_0714200.1	N/A	199	S	Curated	Phosphorylation
PF3D7_1410400	PF3D7_1410400.1	RAP1	139	T	Curated	Phosphorylation
PF3D7_1441500	PF3D7_1441500.1	N/A	259	S	Curated	Phosphorylation
PF3D7_0910200	PF3D7_0910200.1	N/A	397	S	Curated	Phosphorylation
PF3D7_0629700	PF3D7_0629700.1	SET1	3401	S	Curated	Phosphorylation
PF3D7_1406200	PF3D7_1406200.1	SPT6	556	S	Curated	Phosphorylation
PF3D7_1246200	PF3D7_1246200.1	ACT1	30	S	Curated	Phosphorylation
PF3D7_1220900	PF3D7_1220900.1	HP1	110	T	Curated	Phosphorylation
PF3D7_1453000	PF3D7_1453000.1	N/A	706	S	Curated	Phosphorylation
PF3D7_0615400	PF3D7_0615400.1	N/A	996	S	Curated	Phosphorylation
PF3D7_1468100	PF3D7_1468100.1	MORC	1255	S	Curated	Phosphorylation
PF3D7_0310200	PF3D7_0310200.1	N/A	1362	S	Curated	Phosphorylation
PF3D7_1138400	PF3D7_1138400.1	GCalpha	4177	S	Curated	Phosphorylation
PF3D7_0528000	PF3D7_0528000.1	UMP1	58	S	Curated	Phosphorylation
PF3D7_0805700	PF3D7_0805700.1	FIKK8	857	S	Curated	Phosphorylation
PF3D7_0628100	PF3D7_0628100.1	HECT1	6714	S	Curated	Phosphorylation
PF3D7_0318200	PF3D7_0318200.1	RPB1	1723	S	Curated	Phosphorylation
PF3D7_1403700	PF3D7_1403700.1	TRAM	342	S	Curated	Phosphorylation
PF3D7_0919900	PF3D7_0919900.1	RCC-PIP	2719	S	Curated	Phosphorylation
PF3D7_0503200	PF3D7_0503200.1	CDC6	659	S	Curated	Phosphorylation
PF3D7_1429600	PF3D7_1429600.1	GEXP03	187	T	Curated	Phosphorylation
PF3D7_0317300	PF3D7_0317300.1	N/A	2172	S	Curated	Phosphorylation
PF3D7_0914700	PF3D7_0914700.1	MFR4	244	T	Curated	Phosphorylation
PF3D7_0504800	PF3D7_0504800.1	N/A	1127	S	Curated	Phosphorylation
PF3D7_1336800	PF3D7_1336800.1	NUDC	324	T	Curated	Phosphorylation
PF3D7_1233900	PF3D7_1233900.1	SENP1	75	S	Curated	Phosphorylation
PF3D7_1224300	PF3D7_1224300.1	PABP1	101	S	Curated	Phosphorylation
PF3D7_1023700	PF3D7_1023700.1	N/A	9	S	Curated	Phosphorylation
PF3D7_0813100	PF3D7_0813100.1	N/A	478	S	Curated	Phosphorylation
PF3D7_0705100	PF3D7_0705100.1	N/A	874	S	Curated	Phosphorylation
PF3D7_1133800	PF3D7_1133800.1	N/A	505	S	Curated	Phosphorylation
PF3D7_0826900	PF3D7_0826900.1	N/A	365	S	Curated	Phosphorylation
PF3D7_0503300	PF3D7_0503300.1	SRSF12	151	S	Curated	Phosphorylation
PF3D7_0103300	PF3D7_0103300.1	N/A	749	S	Curated	Phosphorylation
PF3D7_1447200	PF3D7_1447200.1	N/A	196	S	Curated	Phosphorylation
PF3D7_1359900	PF3D7_1359900.1	N/A	41	S	Curated	Phosphorylation
PF3D7_0927200	PF3D7_0927200.1	N/A	1458	S	Curated	Phosphorylation
PF3D7_0714200	PF3D7_0714200.1	N/A	374	S	Curated	Phosphorylation
PF3D7_0813000	PF3D7_0813000.1	KIC7	362	S	Curated	Phosphorylation
PF3D7_1121900	PF3D7_1121900.1	PDK1	313	S	Curated	Phosphorylation
PF3D7_0704800	PF3D7_0704800.1	PPM12	499	S	Curated	Phosphorylation
PF3D7_0509800	PF3D7_0509800.1	PI4KB	346	S	Curated	Phosphorylation
PF3D7_1416200	PF3D7_1416200.1	MCA3	317	S	Curated	Phosphorylation
PF3D7_0914500	PF3D7_0914500.1	N/A	1266	S	Curated	Phosphorylation
PF3D7_1408100	PF3D7_1408100.1	PMIII	20	S	Curated	Phosphorylation
PF3D7_1123100	PF3D7_1123100.1	CDPK7	887	S	Curated	Phosphorylation
PF3D7_0716000	PF3D7_0716000.1	N/A	883	S	Curated	Phosphorylation
PF3D7_1458500	PF3D7_1458500.1	SAS4	819	S	Curated	Phosphorylation
PF3D7_1223100	PF3D7_1223100.1	PKAr	113	S	Curated	Phosphorylation
PF3D7_0501300	PF3D7_0501300.1	SBP1	326	T	Curated	Phosphorylation
PF3D7_1312800	PF3D7_1312800.1	AAP2	1439	S	Curated	Phosphorylation
PF3D7_1129400	PF3D7_1129400.1	NSUN3	111	S	Curated	Phosphorylation
PF3D7_1451200	PF3D7_1451200.1	N/A	801	T	Curated	Phosphorylation
PF3D7_1028600	PF3D7_1028600.1	N/A	53	S	Curated	Phosphorylation
PF3D7_1450000	PF3D7_1450000.1	N/A	323	S	Curated	Phosphorylation
PF3D7_0615400	PF3D7_0615400.1	N/A	891	S	Curated	Phosphorylation
PF3D7_1465200	PF3D7_1465200.1	MED4	85	S	Curated	Phosphorylation
PF3D7_1207000	PF3D7_1207000.1	N/A	2078	S	Curated	Phosphorylation
PF3D7_0423500	PF3D7_0423500.1	GAPM2	331	S	Curated	Phosphorylation
PF3D7_0905100	PF3D7_0905100.1	NUP221	95	S	Curated	Phosphorylation
PF3D7_0212400	PF3D7_0212400.1	N/A	3528	S	Curated	Phosphorylation
PF3D7_1008100	PF3D7_1008100.1	PHD1	1035	S	Curated	Phosphorylation
PF3D7_0830500	PF3D7_0830500.1	TryThrA	100	T	Curated	Phosphorylation
PF3D7_1430300	PF3D7_1430300.1	N/A	2415	S	Curated	Phosphorylation
PF3D7_1025900	PF3D7_1025900.1	N/A	576	S	Curated	Phosphorylation
PF3D7_0302100	PF3D7_0302100.1	SRPK1	649	T	Curated	Phosphorylation
PF3D7_1364400	PF3D7_1364400.1	N/A	2629	S	Curated	Phosphorylation
PF3D7_0628100	PF3D7_0628100.1	HECT1	2592	S	Curated	Phosphorylation
PF3D7_1033600	PF3D7_1033600.1	CEF1	522	S	Curated	Phosphorylation
PF3D7_0303300	PF3D7_0303300.1	RPB6	50	S	Curated	Phosphorylation
PF3D7_1364400	PF3D7_1364400.1	N/A	808	S	Curated	Phosphorylation
PF3D7_1016300	PF3D7_1016300.1	GBP130	135	S	Curated	Phosphorylation
PF3D7_1468100	PF3D7_1468100.1	MORC	1901	S	Curated	Phosphorylation
PF3D7_0627100	PF3D7_0627100.1	N/A	1710	S	Curated	Phosphorylation
PF3D7_1216900	PF3D7_1216900.1	N/A	694	S	Curated	Phosphorylation
PF3D7_0522400	PF3D7_0522400.1	N/A	3064	S	Curated	Phosphorylation
PF3D7_1020700	PF3D7_1020700.1	N/A	1196	S	Curated	Phosphorylation
PF3D7_1437500	PF3D7_1437500.1	N/A	34	S	Curated	Phosphorylation
PF3D7_1346400	PF3D7_1346400.1	N/A	3544	S	Curated	Phosphorylation
PF3D7_0611800	PF3D7_0611800.1	N/A	1277	S	Curated	Phosphorylation
PF3D7_1110900	PF3D7_1110900.1	N/A	575	T	Curated	Phosphorylation
PF3D7_0619000	PF3D7_0619000.1	N/A	1338	S	Curated	Phosphorylation
PF3D7_1134300	PF3D7_1134300.1	EMMA1	34	S	Curated	Phosphorylation
PF3D7_1149200	PF3D7_1149200.1	RESA3	193	T	Curated	Phosphorylation
PF3D7_0308300	PF3D7_0308300.1	PIC4	273	S	Curated	Phosphorylation
PF3D7_0815800	PF3D7_0815800.1	VPS9	406	S	Curated	Phosphorylation
PF3D7_1023900	PF3D7_1023900.1	CHD1	2384	T	Curated	Phosphorylation
PF3D7_0423500	PF3D7_0423500.1	GAPM2	362	T	Curated	Phosphorylation
PF3D7_1116800	PF3D7_1116800.1	HSP101	356	S	Curated	Phosphorylation
PF3D7_0609700	PF3D7_0609700.1	KIC6	1468	T	Curated	Phosphorylation
PF3D7_1104200	PF3D7_1104200.1	SNF2L	148	S	Curated	Phosphorylation
PF3D7_0824800	PF3D7_0824800.1	N/A	499	S	Curated	Phosphorylation
PF3D7_1122400	PF3D7_1122400.1	N/A	148	S	Curated	Phosphorylation
PF3D7_1410400	PF3D7_1410400.1	RAP1	296	S	Curated	Phosphorylation
PF3D7_0805700	PF3D7_0805700.1	FIKK8	141	S	Curated	Phosphorylation
PF3D7_0110700	PF3D7_0110700.1	CAF1C	54	S	Curated	Phosphorylation
PF3D7_1004400	PF3D7_1004400.1	N/A	174	T	Curated	Phosphorylation
PF3D7_1353400	PF3D7_1353400.1	N/A	871	S	Curated	Phosphorylation
PF3D7_1108400	PF3D7_1108400.1	CK2alpha	4	S	Curated	Phosphorylation
PF3D7_1138700	PF3D7_1138700.1	KIC5	1073	S	Curated	Phosphorylation
PF3D7_1004300	PF3D7_1004300.1	N/A	941	S	Curated	Phosphorylation
PF3D7_0106300	PF3D7_0106300.1	ATP6	597	S	Curated	Phosphorylation
PF3D7_1349500	PF3D7_1349500.1	N/A	1017	S	Curated	Phosphorylation
PF3D7_1468400	PF3D7_1468400.1	D13	832	S	Curated	Phosphorylation
PF3D7_1243900	PF3D7_1243900.1	DOC2	1250	S	Curated	Phosphorylation
PF3D7_1243900	PF3D7_1243900.1	DOC2	350	T	Curated	Phosphorylation
PF3D7_1308400	PF3D7_1308400.1	N/A	808	S	Curated	Phosphorylation
PF3D7_1366900	PF3D7_1366900.1	N/A	64	S	Curated	Phosphorylation
PF3D7_0807600	PF3D7_0807600.1	N/A	1296	S	Curated	Phosphorylation
PF3D7_0308100	PF3D7_0308100.1	N/A	19	S	Curated	Phosphorylation
PF3D7_0704400	PF3D7_0704400.1	N/A	776	S	Curated	Phosphorylation
PF3D7_1140200	PF3D7_1140200.1	N/A	149	T	Curated	Phosphorylation
PF3D7_0810300	PF3D7_0810300.1	PPM5	221	S	Curated	Phosphorylation
PF3D7_1015900	PF3D7_1015900.1	ENO	383	S	Curated	Phosphorylation
PF3D7_1239800	PF3D7_1239800.1	N/A	3756	S	Curated	Phosphorylation
PF3D7_0914700	PF3D7_0914700.1	MFR4	262	S	Curated	Phosphorylation
PF3D7_1435500	PF3D7_1435500.1	CLC	78	S	Curated	Phosphorylation
PF3D7_1321500	PF3D7_1321500.1	PDEbeta	51	S	Curated	Phosphorylation
PF3D7_0602000	PF3D7_0602000.1	N/A	534	S	Curated	Phosphorylation
PF3D7_1430300	PF3D7_1430300.1	N/A	2344	S	Curated	Phosphorylation
PF3D7_1019000	PF3D7_1019000.1	N/A	2301	S	Curated	Phosphorylation
PF3D7_1301700	PF3D7_1301700.1	CBP2	60	T	Curated	Phosphorylation
PF3D7_1231600	PF3D7_1231600.1	PRP2	15	T	Curated	Phosphorylation
PF3D7_0916000	PF3D7_0916000.1	MFS2	1138	T	Curated	Phosphorylation
PF3D7_1208100	PF3D7_1208100.1	N/A	4239	Y	Curated	Phosphorylation
PF3D7_1002100	PF3D7_1002100.1	PTP5	529	S	Curated	Phosphorylation
PF3D7_1316100	PF3D7_1316100.1	IPK2	1326	S	Curated	Phosphorylation
PF3D7_0508500	PF3D7_0508500.1	ND6	635	S	Curated	Phosphorylation
PF3D7_1435600	PF3D7_1435600.1	N/A	422	S	Curated	Phosphorylation
PF3D7_1356600	PF3D7_1356600.1	N/A	28	S	Curated	Phosphorylation
PF3D7_0505100	PF3D7_0505100.1	TRS85	1528	S	Curated	Phosphorylation
PF3D7_1427300	PF3D7_1427300.1	N/A	751	S	Curated	Phosphorylation
PF3D7_1129900	PF3D7_1129900.1	MFR5	342	T	Curated	Phosphorylation
PF3D7_1239800	PF3D7_1239800.1	N/A	5306	S	Curated	Phosphorylation
PF3D7_0619400	PF3D7_0619400.1	N/A	658	S	Curated	Phosphorylation
PF3D7_0504800	PF3D7_0504800.1	N/A	1554	S	Curated	Phosphorylation
PF3D7_1408600	PF3D7_1408600.1	N/A	62	S	Curated	Phosphorylation
PF3D7_1321700	PF3D7_1321700.1	SF1	19	S	Curated	Phosphorylation
PF3D7_0825000	PF3D7_0825000.1	N/A	1087	S	Curated	Phosphorylation
PF3D7_0716800	PF3D7_0716800.1	EIF3I	132	S	Curated	Phosphorylation
PF3D7_0926100	PF3D7_0926100.1	N/A	974	S	Curated	Phosphorylation
PF3D7_0307500	PF3D7_0307500.1	SKA2	169	S	Curated	Phosphorylation
PF3D7_0904600	PF3D7_0904600.1	N/A	962	S	Curated	Phosphorylation
PF3D7_1406100	PF3D7_1406100.1	N/A	528	S	Curated	Phosphorylation
PF3D7_1448300	PF3D7_1448300.1	N/A	940	S	Curated	Phosphorylation
PF3D7_0805700	PF3D7_0805700.1	FIKK8	945	S	Curated	Phosphorylation
PF3D7_1149000	PF3D7_1149000.1	Pf332	2628	S	Curated	Phosphorylation
PF3D7_0723800	PF3D7_0723800.1	N/A	558	S	Curated	Phosphorylation
PF3D7_1339700	PF3D7_1339700.1	N/A	1430	S	Curated	Phosphorylation
PF3D7_0826500	PF3D7_0826500.1	UBE4B	331	S	Curated	Phosphorylation
PF3D7_0825000	PF3D7_0825000.1	N/A	41	S	Curated	Phosphorylation
PF3D7_0714200	PF3D7_0714200.1	N/A	159	S	Curated	Phosphorylation
PF3D7_0720700	PF3D7_0720700.1	PX1	1783	S	Curated	Phosphorylation
PF3D7_1351700	PF3D7_1351700.1	IMC1f	888	S	Curated	Phosphorylation
PF3D7_1416600	PF3D7_1416600.1	N/A	2316	S	Curated	Phosphorylation
PF3D7_0933500	PF3D7_0933500.1	N/A	823	S	Curated	Phosphorylation
PF3D7_1308400	PF3D7_1308400.1	N/A	556	Y	Curated	Phosphorylation
PF3D7_0307700	PF3D7_0307700.1	N/A	31	S	Curated	Phosphorylation
PF3D7_0720700	PF3D7_0720700.1	PX1	1781	T	Curated	Phosphorylation
PF3D7_1136700	PF3D7_1136700.1	AIP	76	S	Curated	Phosphorylation
PF3D7_1251200	PF3D7_1251200.1	N/A	386	S	Curated	Phosphorylation
PF3D7_1030200	PF3D7_1030200.1	CLAMP	281	S	Curated	Phosphorylation
PF3D7_1343700	PF3D7_1343700.1	Kelch13	67	S	Curated	Phosphorylation
PF3D7_0918900	PF3D7_0918900.1	gammaGCS	1042	T	Curated	Phosphorylation
PF3D7_1351700	PF3D7_1351700.1	IMC1f	886	S	Curated	Phosphorylation
PF3D7_0704100	PF3D7_0704100.1	BTP2	2891	Y	Curated	Phosphorylation
PF3D7_1416200	PF3D7_1416200.1	MCA3	253	T	Curated	Phosphorylation
PF3D7_0915400	PF3D7_0915400.1	PFK9	684	S	Curated	Phosphorylation
PF3D7_1316600	PF3D7_1316600.1	CCT	519	S	Curated	Phosphorylation
PF3D7_1227800	PF3D7_1227800.1	ELP3	62	S	Curated	Phosphorylation
PF3D7_0611800	PF3D7_0611800.1	N/A	2113	S	Curated	Phosphorylation
PF3D7_0803200	PF3D7_0803200.1	N/A	407	S	Curated	Phosphorylation
PF3D7_0913200	PF3D7_0913200.1	EF-1beta	6	S	Curated	Phosphorylation
PF3D7_0323700	PF3D7_0323700.1	SART1	81	T	Curated	Phosphorylation
PF3D7_1004300	PF3D7_1004300.1	N/A	905	S	Curated	Phosphorylation
PF3D7_0726400	PF3D7_0726400.1	N/A	1338	S	Curated	Phosphorylation
PF3D7_1225700	PF3D7_1225700.1	N/A	266	S	Curated	Phosphorylation
PF3D7_0318200	PF3D7_0318200.1	RPB1	1649	S	Curated	Phosphorylation
PF3D7_1107300	PF3D7_1107300.1	PAIP1	1614	S	Curated	Phosphorylation
PF3D7_0617200	PF3D7_0617200.1	N/A	276	S	Curated	Phosphorylation
PF3D7_1021900	PF3D7_1021900.1	N/A	241	S	Curated	Phosphorylation
PF3D7_1205600	PF3D7_1205600.1	N/A	279	S	Curated	Phosphorylation
PF3D7_1409400	PF3D7_1409400.1	N/A	18	S	Curated	Phosphorylation
PF3D7_1438400	PF3D7_1438400.1	MCA2	1536	S	Curated	Phosphorylation
PF3D7_1435600	PF3D7_1435600.1	N/A	22	S	Curated	Phosphorylation
PF3D7_0303100	PF3D7_0303100.1	N/A	153	S	Curated	Phosphorylation
PF3D7_1007200	PF3D7_1007200.1	N/A	4	S	Curated	Phosphorylation
PF3D7_1340900	PF3D7_1340900.1	PiT	629	T	Curated	Phosphorylation
PF3D7_1149200	PF3D7_1149200.1	RESA3	382	S	Curated	Phosphorylation
PF3D7_1211200	PF3D7_1211200.1	N/A	990	S	Curated	Phosphorylation
PF3D7_1238600	PF3D7_1238600.1	NSM	109	S	Curated	Phosphorylation
PF3D7_0529800	PF3D7_0529800.1	N/A	732	S	Curated	Phosphorylation
PF3D7_0503300	PF3D7_0503300.1	SRSF12	258	S	Curated	Phosphorylation
PF3D7_0203000	PF3D7_0203000.1	ROPE	1468	Y	Curated	Phosphorylation
PF3D7_1239200	PF3D7_1239200.1	ApiAP2	1994	S	Curated	Phosphorylation
PF3D7_1312100	PF3D7_1312100.1	N/A	637	S	Curated	Phosphorylation
PF3D7_1417700	PF3D7_1417700.1	N/A	154	S	Curated	Phosphorylation
PF3D7_1149000	PF3D7_1149000.1	Pf332	2542	T	Curated	Phosphorylation
PF3D7_1467900	PF3D7_1467900.1	N/A	956	S	Curated	Phosphorylation
PF3D7_0824800	PF3D7_0824800.1	N/A	603	S	Curated	Phosphorylation
PF3D7_0422500	PF3D7_0422500.1	BRR2	611	T	Curated	Phosphorylation
PF3D7_0410000	PF3D7_0410000.1	EVP1	64	S	Curated	Phosphorylation
PF3D7_0621100	PF3D7_0621100.1	N/A	165	S	Curated	Phosphorylation
PF3D7_1475600	PF3D7_1475600.1	BDP4	343	S	Curated	Phosphorylation
PF3D7_0507100	PF3D7_0507100.1	RPL4	162	S	Curated	Phosphorylation
PF3D7_1343100	PF3D7_1343100.1	N/A	119	S	Curated	Phosphorylation
PF3D7_0910200	PF3D7_0910200.1	N/A	375	S	Curated	Phosphorylation
PF3D7_0604500	PF3D7_0604500.1	N/A	675	S	Curated	Phosphorylation
PF3D7_1233600	PF3D7_1233600.1	AARP1	1552	T	Curated	Phosphorylation
PF3D7_0402400	PF3D7_0402400.1	GEXP18	166	S	Curated	Phosphorylation
PF3D7_1139800	PF3D7_1139800.1	N/A	527	S	Curated	Phosphorylation
PF3D7_0525100	PF3D7_0525100.1	ACS10	375	S	Curated	Phosphorylation
PF3D7_1327300	PF3D7_1327300.1	N/A	316	S	Curated	Phosphorylation
PF3D7_1364400	PF3D7_1364400.1	N/A	1215	S	Curated	Phosphorylation
PF3D7_0804500	PF3D7_0804500.1	N/A	1590	S	Curated	Phosphorylation
PF3D7_0518500	PF3D7_0518500.1	DDX23	271	S	Curated	Phosphorylation
PF3D7_1149000	PF3D7_1149000.1	Pf332	759	S	Curated	Phosphorylation
PF3D7_1140200	PF3D7_1140200.1	N/A	148	S	Curated	Phosphorylation
PF3D7_1357400	PF3D7_1357400.1	N/A	218	S	Curated	Phosphorylation
PF3D7_0610200	PF3D7_0610200.1	RBM25	857	S	Curated	Phosphorylation
PF3D7_0629700	PF3D7_0629700.1	SET1	3712	S	Curated	Phosphorylation
PF3D7_1440000	PF3D7_1440000.1	N/A	364	S	Curated	Phosphorylation
PF3D7_1121000	PF3D7_1121000.1	DHHC3	271	S	Curated	Phosphorylation
PF3D7_1341900	PF3D7_1341900.1	N/A	217	S	Curated	Phosphorylation
PF3D7_1205500	PF3D7_1205500.1	N/A	442	S	Curated	Phosphorylation
PF3D7_0521000	PF3D7_0521000.1	N/A	278	S	Curated	Phosphorylation
PF3D7_0110600	PF3D7_0110600.1	PIP5K	799	S	Curated	Phosphorylation
PF3D7_0629700	PF3D7_0629700.1	SET1	3402	Y	Curated	Phosphorylation
PF3D7_1468700	PF3D7_1468700.1	eIF4A	47	S	Curated	Phosphorylation
PF3D7_0305600	PF3D7_0305600.1	APE1	192	Y	Curated	Phosphorylation
PF3D7_0826900	PF3D7_0826900.1	N/A	124	S	Curated	Phosphorylation
PF3D7_0826100	PF3D7_0826100.1	HEUL	6831	S	Curated	Phosphorylation
PF3D7_1036900	PF3D7_1036900.1	N/A	1051	S	Curated	Phosphorylation
PF3D7_1207000	PF3D7_1207000.1	N/A	406	S	Curated	Phosphorylation
PF3D7_1234100	PF3D7_1234100.1	BDP5	3402	T	Curated	Phosphorylation
PF3D7_1107300	PF3D7_1107300.1	PAIP1	1199	S	Curated	Phosphorylation
PF3D7_0305500	PF3D7_0305500.1	N/A	2195	S	Curated	Phosphorylation
PF3D7_1328300	PF3D7_1328300.1	N/A	279	S	Curated	Phosphorylation
PF3D7_0719900	PF3D7_0719900.1	N/A	339	S	Curated	Phosphorylation
PF3D7_0922900	PF3D7_0922900.1	FabG	106	S	Curated	Phosphorylation
PF3D7_1119800	PF3D7_1119800.1	ASF1	195	S	Curated	Phosphorylation
PF3D7_0317200	PF3D7_0317200.1	CRK4	977	S	Curated	Phosphorylation
PF3D7_0904600	PF3D7_0904600.1	N/A	1151	S	Curated	Phosphorylation
PF3D7_0402400	PF3D7_0402400.1	GEXP18	100	S	Curated	Phosphorylation
PF3D7_0720700	PF3D7_0720700.1	PX1	1064	S	Curated	Phosphorylation
PF3D7_0804500	PF3D7_0804500.1	N/A	248	S	Curated	Phosphorylation
PF3D7_1457900	PF3D7_1457900.1	N/A	1300	S	Curated	Phosphorylation
PF3D7_0918300	PF3D7_0918300.1	EIF3F	10	T	Curated	Phosphorylation
PF3D7_0625200	PF3D7_0625200.1	N/A	385	T	Curated	Phosphorylation
PF3D7_1126000	PF3D7_1126000.1	ThrRS	1012	T	Curated	Phosphorylation
PF3D7_1036900	PF3D7_1036900.1	N/A	483	S	Curated	Phosphorylation
PF3D7_1233600	PF3D7_1233600.1	AARP1	2358	S	Curated	Phosphorylation
PF3D7_0711400	PF3D7_0711400.1	SAP18	415	S	Curated	Phosphorylation
PF3D7_0814500	PF3D7_0814500.1	N/A	675	Y	Curated	Phosphorylation
PF3D7_1473200	PF3D7_1473200.1	N/A	133	S	Curated	Phosphorylation
PF3D7_0926500	PF3D7_0926500.1	N/A	1337	S	Curated	Phosphorylation
PF3D7_0824400	PF3D7_0824400.1	NT2	376	S	Curated	Phosphorylation
PF3D7_0621900	PF3D7_0621900.1	SRP68	345	S	Curated	Phosphorylation
PF3D7_0214800	PF3D7_0214800.1	N/A	1063	S	Curated	Phosphorylation
PF3D7_1107800	PF3D7_1107800.1	ApiAP2	385	S	Curated	Phosphorylation
PF3D7_1008500	PF3D7_1008500.1	N/A	569	S	Curated	Phosphorylation
PF3D7_0811300	PF3D7_0811300.1	CAF1	803	S	Curated	Phosphorylation
PF3D7_1138000	PF3D7_1138000.1	N/A	1289	S	Curated	Phosphorylation
PF3D7_0410900	PF3D7_0410900.1	N/A	677	S	Curated	Phosphorylation
PF3D7_0309200	PF3D7_0309200.1	ARK2	1216	S	Curated	Phosphorylation
PF3D7_1104300	PF3D7_1104300.1	N/A	903	S	Curated	Phosphorylation
PF3D7_1117900	PF3D7_1117900.1	N/A	1354	S	Curated	Phosphorylation
PF3D7_1359600	PF3D7_1359600.1	N/A	137	S	Curated	Phosphorylation
PF3D7_0610600	PF3D7_0610600.1	CDPK2	227	T	Curated	Phosphorylation
PF3D7_1122500	PF3D7_1122500.1	KIC10	1220	Y	Curated	Phosphorylation
PF3D7_1368800	PF3D7_1368800.1	ERCC4	115	S	Curated	Phosphorylation
PF3D7_0308700	PF3D7_0308700.1	N/A	41	S	Curated	Phosphorylation
PF3D7_1026800	PF3D7_1026800.1	RPS2	250	T	Curated	Phosphorylation
PF3D7_0501800	PF3D7_0501800.1	CAF1A	183	S	Curated	Phosphorylation
PF3D7_1107300	PF3D7_1107300.1	PAIP1	2308	S	Curated	Phosphorylation
PF3D7_1468100	PF3D7_1468100.1	MORC	1663	S	Curated	Phosphorylation
PF3D7_0303100	PF3D7_0303100.1	N/A	400	S	Curated	Phosphorylation
PF3D7_0407800	PF3D7_0407800.1	CINCH	1764	S	Curated	Phosphorylation
PF3D7_1343800	PF3D7_1343800.1	N/A	2371	S	Curated	Phosphorylation
PF3D7_1312800	PF3D7_1312800.1	AAP2	1469	S	Curated	Phosphorylation
PF3D7_1016000	PF3D7_1016000.1	N/A	130	S	Curated	Phosphorylation
PF3D7_1004300	PF3D7_1004300.1	N/A	946	T	Curated	Phosphorylation
PF3D7_0610900	PF3D7_0610900.1	SPT5	782	S	Curated	Phosphorylation
PF3D7_0214100	PF3D7_0214100.1	SEC31	663	S	Curated	Phosphorylation
PF3D7_1012500	PF3D7_1012500.1	N/A	153	T	Curated	Phosphorylation
PF3D7_1237900	PF3D7_1237900.1	N/A	440	S	Curated	Phosphorylation
PF3D7_1011800	PF3D7_1011800.1	PREBP	8	S	Curated	Phosphorylation
PF3D7_0613800	PF3D7_0613800.1	ApiAP2	1308	T	Curated	Phosphorylation
PF3D7_1343000	PF3D7_1343000.1	PMT	49	S	Curated	Phosphorylation
PF3D7_1014900	PF3D7_1014900.1	KIC8	291	S	Curated	Phosphorylation
PF3D7_1447900	PF3D7_1447900.1	MDR2	972	S	Curated	Phosphorylation
PF3D7_1031300	PF3D7_1031300.1	N/A	718	S	Curated	Phosphorylation
PF3D7_1427500	PF3D7_1427500.1	MSH2-1	764	S	Curated	Phosphorylation
PF3D7_1122500	PF3D7_1122500.1	KIC10	1282	S	Curated	Phosphorylation
PF3D7_1359900	PF3D7_1359900.1	N/A	1435	S	Curated	Phosphorylation
PF3D7_1246300	PF3D7_1246300.1	KIC4	341	S	Curated	Phosphorylation
PF3D7_1316600	PF3D7_1316600.1	CCT	147	S	Curated	Phosphorylation
PF3D7_1103800	PF3D7_1103800.1	NOT1-G	1953	S	Curated	Phosphorylation
PF3D7_1028600	PF3D7_1028600.1	N/A	69	S	Curated	Phosphorylation
PF3D7_1221000	PF3D7_1221000.1	SET10	23	S	Curated	Phosphorylation
PF3D7_1037300	PF3D7_1037300.1	AAC1	42	S	Curated	Phosphorylation
PF3D7_1417200	PF3D7_1417200.1	NOT1	3488	S	Curated	Phosphorylation
PF3D7_0704400	PF3D7_0704400.1	N/A	956	Y	Curated	Phosphorylation
PF3D7_0604100	PF3D7_0604100.1	SIP2	778	S	Curated	Phosphorylation
PF3D7_1015400	PF3D7_1015400.1	N/A	650	S	Curated	Phosphorylation
PF3D7_0209800	PF3D7_0209800.1	UAP56	71	S	Curated	Phosphorylation
PF3D7_0912500	PF3D7_0912500.1	N/A	137	S	Curated	Phosphorylation
PF3D7_1225700	PF3D7_1225700.1	N/A	126	S	Curated	Phosphorylation
PF3D7_1467600	PF3D7_1467600.1	N/A	42	S	Curated	Phosphorylation
PF3D7_0613800	PF3D7_0613800.1	ApiAP2	1215	T	Curated	Phosphorylation
PF3D7_1237400	PF3D7_1237400.1	N/A	246	S	Curated	Phosphorylation
PF3D7_1145400	PF3D7_1145400.1	DYN1	780	S	Curated	Phosphorylation
PF3D7_0523000	PF3D7_0523000.1	MDR1	509	S	Curated	Phosphorylation
PF3D7_0407700	PF3D7_0407700.1	N/A	1025	S	Curated	Phosphorylation
PF3D7_1219000	PF3D7_1219000.1	FRM2	1017	S	Curated	Phosphorylation
PF3D7_1237900	PF3D7_1237900.1	N/A	182	S	Curated	Phosphorylation
PF3D7_0418600	PF3D7_0418600.1	N/A	1281	S	Curated	Phosphorylation
PF3D7_1027300	PF3D7_1027300.1	nPrx	226	S	Curated	Phosphorylation
PF3D7_0202000	PF3D7_0202000.1	KAHRP	604	T	Curated	Phosphorylation
PF3D7_1467600	PF3D7_1467600.1	N/A	1049	S	Curated	Phosphorylation
PF3D7_0113200	PF3D7_0113200.1	N/A	342	S	Curated	Phosphorylation
PF3D7_1343300	PF3D7_1343300.1	N/A	477	S	Curated	Phosphorylation
PF3D7_1126700	PF3D7_1126700.1	ATG23	4	S	Curated	Phosphorylation
PF3D7_1410200	PF3D7_1410200.1	CTPS	408	T	Curated	Phosphorylation
PF3D7_0308300	PF3D7_0308300.1	PIC4	192	S	Curated	Phosphorylation
PF3D7_0628100	PF3D7_0628100.1	HECT1	4862	T	Curated	Phosphorylation
PF3D7_0932100	PF3D7_0932100.1	N/A	768	S	Curated	Phosphorylation
PF3D7_1315500	PF3D7_1315500.1	N/A	57	S	Curated	Phosphorylation
PF3D7_1417200	PF3D7_1417200.1	NOT1	1042	S	Curated	Phosphorylation
PF3D7_0407800	PF3D7_0407800.1	CINCH	645	T	Curated	Phosphorylation
PF3D7_1115800	PF3D7_1115800.1	N/A	164	T	Curated	Phosphorylation
PF3D7_1343800	PF3D7_1343800.1	N/A	3051	S	Curated	Phosphorylation
PF3D7_1425800	PF3D7_1425800.1	N/A	382	Y	Curated	Phosphorylation
PF3D7_0405400	PF3D7_0405400.1	PRPF8	367	S	Curated	Phosphorylation
PF3D7_1233200	PF3D7_1233200.1	N/A	1997	S	Curated	Phosphorylation
PF3D7_0521000	PF3D7_0521000.1	N/A	480	S	Curated	Phosphorylation
PF3D7_1107800	PF3D7_1107800.1	ApiAP2	1574	S	Curated	Phosphorylation
PF3D7_1433400	PF3D7_1433400.1	PHD2	4826	S	Curated	Phosphorylation
PF3D7_1003600	PF3D7_1003600.1	IMC1c	8	S	Curated	Phosphorylation
PF3D7_0529400	PF3D7_0529400.1	N/A	897	S	Curated	Phosphorylation
PF3D7_1209300	PF3D7_1209300.1	TRZ	25	S	Curated	Phosphorylation
PF3D7_1325400	PF3D7_1325400.1	N/A	1023	S	Curated	Phosphorylation
PF3D7_0622800	PF3D7_0622800.1	N/A	123	S	Curated	Phosphorylation
PF3D7_1410300	PF3D7_1410300.1	N/A	493	S	Curated	Phosphorylation
PF3D7_0202400	PF3D7_0202400.1	PTEF	505	T	Curated	Phosphorylation
PF3D7_0719900	PF3D7_0719900.1	N/A	660	Y	Curated	Phosphorylation
PF3D7_1025000	PF3D7_1025000.1	EPS15	136	S	Curated	Phosphorylation
PF3D7_1303400	PF3D7_1303400.1	LisH	610	S	Curated	Phosphorylation
PF3D7_1343800	PF3D7_1343800.1	N/A	2044	S	Curated	Phosphorylation
PF3D7_1320700	PF3D7_1320700.1	N/A	245	T	Curated	Phosphorylation
PF3D7_0506900	PF3D7_0506900.1	ROM4	194	S	Curated	Phosphorylation
PF3D7_1223700	PF3D7_1223700.1	VIT	150	T	Curated	Phosphorylation
PF3D7_0717700	PF3D7_0717700.1	N/A	270	S	Curated	Phosphorylation
PF3D7_0207100	PF3D7_0207100.1	N/A	1660	S	Curated	Phosphorylation
PF3D7_0926800	PF3D7_0926800.1	N/A	925	S	Curated	Phosphorylation
PF3D7_1362700	PF3D7_1362700.1	N/A	663	S	Curated	Phosphorylation
PF3D7_1239800	PF3D7_1239800.1	N/A	2097	S	Curated	Phosphorylation
PF3D7_0630600	PF3D7_0630600.1	N/A	66	S	Curated	Phosphorylation
PF3D7_0525000	PF3D7_0525000.1	N/A	537	S	Curated	Phosphorylation
PF3D7_1460500	PF3D7_1460500.1	N/A	337	S	Curated	Phosphorylation
PF3D7_0610600	PF3D7_0610600.1	CDPK2	18	S	Curated	Phosphorylation
PF3D7_0305500	PF3D7_0305500.1	N/A	495	S	Curated	Phosphorylation
PF3D7_1340300	PF3D7_1340300.1	N/A	216	S	Curated	Phosphorylation
PF3D7_1143100	PF3D7_1143100.1	AP2-O	133	S	Curated	Phosphorylation
PF3D7_1142100	PF3D7_1142100.1	N/A	65	S	Curated	Phosphorylation
PF3D7_1251200	PF3D7_1251200.1	N/A	529	S	Curated	Phosphorylation
PF3D7_1306400	PF3D7_1306400.1	RPT4	50	S	Curated	Phosphorylation
PF3D7_0701600	PF3D7_0701600.1	MC-2TM	58	T	Curated	Phosphorylation
PF3D7_0616200	PF3D7_0616200.1	NDC80	52	S	Curated	Phosphorylation
PF3D7_0932300	PF3D7_0932300.1	M18AAP	203	T	Curated	Phosphorylation
PF3D7_0526200	PF3D7_0526200.1	ARFGAP2	458	S	Curated	Phosphorylation
PF3D7_1209200	PF3D7_1209200.1	LSM7	6	T	Curated	Phosphorylation
PF3D7_0511500	PF3D7_0511500.1	N/A	7873	S	Curated	Phosphorylation
PF3D7_0307700	PF3D7_0307700.1	N/A	89	S	Curated	Phosphorylation
PF3D7_0510100	PF3D7_0510100.1	N/A	1310	S	Curated	Phosphorylation
PF3D7_0510100	PF3D7_0510100.1	N/A	31	Y	Curated	Phosphorylation
PF3D7_0305500	PF3D7_0305500.1	N/A	2818	S	Curated	Phosphorylation
PF3D7_1408700	PF3D7_1408700.1	N/A	6479	S	Curated	Phosphorylation
PF3D7_0610900	PF3D7_0610900.1	SPT5	1121	S	Curated	Phosphorylation
PF3D7_0611600	PF3D7_0611600.1	BTP1	341	T	Curated	Phosphorylation
PF3D7_1430300	PF3D7_1430300.1	N/A	2257	S	Curated	Phosphorylation
PF3D7_0530300	PF3D7_0530300.1	PIC6	279	S	Curated	Phosphorylation
PF3D7_1348900	PF3D7_1348900.1	N/A	25	S	Curated	Phosphorylation
PF3D7_0626400	PF3D7_0626400.1	N/A	367	S	Curated	Phosphorylation
PF3D7_1309200	PF3D7_1309200.1	PPM6	47	S	Curated	Phosphorylation
PF3D7_1438100	PF3D7_1438100.1	SEC62	121	S	Curated	Phosphorylation
PF3D7_0730900	PF3D7_0730900.1	PTP4	698	S	Curated	Phosphorylation
PF3D7_0608500	PF3D7_0608500.1	N/A	30	S	Curated	Phosphorylation
PF3D7_0316600	PF3D7_0316600.1	FNT	304	S	Curated	Phosphorylation
PF3D7_1004400	PF3D7_1004400.1	N/A	586	S	Curated	Phosphorylation
PF3D7_1129100	PF3D7_1129100.1	PV1	202	S	Curated	Phosphorylation
PF3D7_1039000	PF3D7_1039000.1	FIKK10.2	854	S	Curated	Phosphorylation
PF3D7_1249800	PF3D7_1249800.1	THO2	2334	S	Curated	Phosphorylation
PF3D7_1234800	PF3D7_1234800.1	SF3B3	210	S	Curated	Phosphorylation
PF3D7_1461800	PF3D7_1461800.1	N/A	638	S	Curated	Phosphorylation
PF3D7_1433400	PF3D7_1433400.1	PHD2	1663	T	Curated	Phosphorylation
PF3D7_0709000	PF3D7_0709000.1	CRT	33	S	Curated	Phosphorylation
PF3D7_0825000	PF3D7_0825000.1	N/A	1403	S	Curated	Phosphorylation
PF3D7_1003600	PF3D7_1003600.1	IMC1c	257	S	Curated	Phosphorylation
PF3D7_0730500	PF3D7_0730500.1	N/A	694	Y	Curated	Phosphorylation
PF3D7_1468900	PF3D7_1468900.1	N/A	60	S	Curated	Phosphorylation
PF3D7_0401800	PF3D7_0401800.1	PfD80	94	T	Curated	Phosphorylation
PF3D7_1359400	PF3D7_1359400.1	CELF1	30	S	Curated	Phosphorylation
PF3D7_1408700	PF3D7_1408700.1	N/A	3472	S	Curated	Phosphorylation
PF3D7_1131800	PF3D7_1131800.1	N/A	1570	S	Curated	Phosphorylation
PF3D7_0629500	PF3D7_0629500.1	AAT1	113	S	Curated	Phosphorylation
PF3D7_0922100	PF3D7_0922100.1	N/A	296	T	Curated	Phosphorylation
PF3D7_0822900	PF3D7_0822900.1	PIC2	1038	S	Curated	Phosphorylation
PF3D7_0731100	PF3D7_0731100.1	PTP2	233	S	Curated	Phosphorylation
PF3D7_1014600	PF3D7_1014600.1	ADA2	2356	S	Curated	Phosphorylation
PF3D7_0516700	PF3D7_0516700.1	N/A	556	S	Curated	Phosphorylation
PF3D7_0619400	PF3D7_0619400.1	N/A	592	S	Curated	Phosphorylation
PF3D7_0904900	PF3D7_0904900.1	CuTP	340	S	Curated	Phosphorylation
PF3D7_1415400	PF3D7_1415400.1	N/A	463	S	Curated	Phosphorylation
PF3D7_1455300	PF3D7_1455300.1	N/A	555	S	Curated	Phosphorylation
PF3D7_1104100	PF3D7_1104100.1	SYN13	20	S	Curated	Phosphorylation
PF3D7_0917700	PF3D7_0917700.1	N/A	352	S	Curated	Phosphorylation
PF3D7_0822900	PF3D7_0822900.1	PIC2	504	S	Curated	Phosphorylation
PF3D7_0531100	PF3D7_0531100.1	N/A	773	S	Curated	Phosphorylation
PF3D7_0504000	PF3D7_0504000.1	ATPase3	1028	S	Curated	Phosphorylation
PF3D7_0310900	PF3D7_0310900.1	N/A	343	S	Curated	Phosphorylation
PF3D7_1416200	PF3D7_1416200.1	MCA3	554	S	Curated	Phosphorylation
PF3D7_1352400	PF3D7_1352400.1	N/A	1241	Y	Curated	Phosphorylation
PF3D7_0313000	PF3D7_0313000.1	N/A	291	S	Curated	Phosphorylation
PF3D7_0704400	PF3D7_0704400.1	N/A	951	T	Curated	Phosphorylation
PF3D7_1010200	PF3D7_1010200.1	N/A	343	S	Curated	Phosphorylation
PF3D7_0801700	PF3D7_0801700.1	SENP2	1011	S	Curated	Phosphorylation
PF3D7_1014900	PF3D7_1014900.1	KIC8	20	S	Curated	Phosphorylation
PF3D7_0618900	PF3D7_0618900.1	GPI1	199	S	Curated	Phosphorylation
PF3D7_0310900	PF3D7_0310900.1	N/A	596	S	Curated	Phosphorylation
PF3D7_1442900	PF3D7_1442900.1	ARFGEF	2836	S	Curated	Phosphorylation
PF3D7_0612200	PF3D7_0612200.1	LRR6	615	S	Curated	Phosphorylation
PF3D7_0102200	PF3D7_0102200.1	RESA	559	T	Curated	Phosphorylation
PF3D7_0611600	PF3D7_0611600.1	BTP1	397	S	Curated	Phosphorylation
PF3D7_1126700	PF3D7_1126700.1	ATG23	49	S	Curated	Phosphorylation
PF3D7_1308400	PF3D7_1308400.1	N/A	494	S	Curated	Phosphorylation
PF3D7_0934800	PF3D7_0934800.1	PKAc	193	T	Curated	Phosphorylation
PF3D7_0818900	PF3D7_0818900.1	HSP70	554	S	Curated	Phosphorylation
PF3D7_1365700	PF3D7_1365700.1	N/A	39	S	Curated	Phosphorylation
PF3D7_0919900	PF3D7_0919900.1	RCC-PIP	3094	S	Curated	Phosphorylation
PF3D7_0522400	PF3D7_0522400.1	N/A	8871	S	Curated	Phosphorylation
PF3D7_1226600	PF3D7_1226600.1	PCNA2	203	S	Curated	Phosphorylation
PF3D7_1107300	PF3D7_1107300.1	PAIP1	2006	S	Curated	Phosphorylation
PF3D7_1003600	PF3D7_1003600.1	IMC1c	172	S	Curated	Phosphorylation
PF3D7_1023900	PF3D7_1023900.1	CHD1	3099	T	Curated	Phosphorylation
PF3D7_1426700	PF3D7_1426700.1	PEPC	1109	S	Curated	Phosphorylation
PF3D7_1416200	PF3D7_1416200.1	MCA3	2179	Y	Curated	Phosphorylation
PF3D7_0822900	PF3D7_0822900.1	PIC2	512	T	Curated	Phosphorylation
PF3D7_1033300	PF3D7_1033300.1	N/A	18	S	Curated	Phosphorylation
PF3D7_0924500	PF3D7_0924500.1	N/A	418	S	Curated	Phosphorylation
PF3D7_0208100	PF3D7_0208100.1	N/A	798	S	Curated	Phosphorylation
PF3D7_1202600	PF3D7_1202600.1	NEMF	315	S	Curated	Phosphorylation
PF3D7_1025000	PF3D7_1025000.1	EPS15	980	S	Curated	Phosphorylation
PF3D7_0919800	PF3D7_0919800.1	N/A	709	S	Curated	Phosphorylation
PF3D7_0613900	PF3D7_0613900.1	MyoE	1580	S	Curated	Phosphorylation
PF3D7_0707600	PF3D7_0707600.1	MED10	17	T	Curated	Phosphorylation
PF3D7_0407800	PF3D7_0407800.1	CINCH	1705	Y	Curated	Phosphorylation
PF3D7_0509800	PF3D7_0509800.1	PI4KB	87	S	Curated	Phosphorylation
PF3D7_0504000	PF3D7_0504000.1	ATPase3	1033	S	Curated	Phosphorylation
PF3D7_0604500	PF3D7_0604500.1	N/A	1737	S	Curated	Phosphorylation
PF3D7_1312800	PF3D7_1312800.1	AAP2	1789	S	Curated	Phosphorylation
PF3D7_0519700	PF3D7_0519700.1	N/A	64	S	Curated	Phosphorylation
PF3D7_1474900	PF3D7_1474900.1	CITH	99	S	Curated	Phosphorylation
PF3D7_1235300	PF3D7_1235300.1	NOT4	1159	S	Curated	Phosphorylation
PF3D7_1007700	PF3D7_1007700.1	AP2-I	913	S	Curated	Phosphorylation
PF3D7_1207000	PF3D7_1207000.1	N/A	2049	S	Curated	Phosphorylation
PF3D7_0905400	PF3D7_0905400.1	RhopH3	754	S	Curated	Phosphorylation
PF3D7_0204700	PF3D7_0204700.1	HT1	10	S	Curated	Phosphorylation
PF3D7_1417600	PF3D7_1417600.1	N/A	3567	T	Curated	Phosphorylation
[truncated: 174,873 more rows]
