# Supplementary material for: Complementary crosstalk between palmitoylation and phosphorylation events in MTIP regulates its role during Plasmodium falciparum invasion
Source: Front Cell Infect Microbiol. 2022 Sep 29;12:924424. doi: 10.3389/fcimb.2022.924424 (PMC9556994; doi:10.3389/fcimb.2022.924424)
Supplement: Supplementary Table 5 — Consensus palmitoylation and phosphorylation sequence windows discovered using the MoMo web interface along with the sequence logo graphs. [file Table_5.xlsx]

## Sheet: Palmitoylation Motifs
Inputs & Settings
Algorithm
Name: motif-x
Motif Width: 15
Minimum Occurrences for Residue/Position pair: 20
Binomial probability threshold for Residue/Position pair: 0.000001
Binomial p-value calculations: accurate
Post-translationally modified peptides
File Name	File Type
global_palmpeptides_15_formotifs.txt	Raw
Number of Mods: 6275
Number of Mod Types: 1
Number of Mods Passing Filters: 6121
Number of Mod Types Passing Filters: 1
Protein Database and Control Peptides
Protein Database: none provided
Control peptides from shuffled input peptides: 6121
Other Settings
filter foreground peptides?	no
remove peptides if they contain 'X'?	yes
eliminate duplicate peptides?	yes, if their 15 central residues match
generate single motif per mass?	no
random number seed	0
MoMo version
5.4.1 (Release date: Sat Aug 21 19:23:23 2021 -0700)
Reference
Alice Cheng, Charles Grant, Timothy L. Bailey and William Noble, "MoMo: Discovery of statistically significant post-translational modification motifs", Bioinformatics, 35(16):2774-2782, 2018.
Discovered Motifs
Motif Logo	Mod	Motif	Regular Expression	Score	FG	BG	Fold Enrichment	Unadjusted p-value	Tests	Adjusted p-value
	C	xxxxxxx_C_CxxxxxE	.......CC.....E	335.18	79/6121	7/6121	11.3	6.2e-17	513	3.2e-14
	C	xxxxxxx_C_CxDxxxx	.......CC.D....	296.09	67/6121	6/6121	11.2	1.7e-14	508	8.6e-12
	C	NNxxxxx_C_Cxxxxxx	NN.....CC......	279.51	39/6121	1/6121	39	3.5e-11	516	1.8e-08
	C	xxHxxxx_C_Cxxxxxx	..H....CC......	250.19	32/6121	2/6121	16	3.3e-08	501	1.7e-05
	C	xxxxxxx_C_CxxxDxx	.......CC...D..	235.97	77/6121	11/6121	7	1e-13	497	5e-11
	C	xxxxxxP_C_Cxxxxxx	......PCC......	211.1	35/6121	03/6121	11.7	3.2e-08	489	1.6e-05
	C	xxxxxxx_C_CxxxxxI	.......CC.....I	199.19	126/6121	21/6121	6	6.1e-20	485	2.9e-17
	C	xxxxxEx_C_Cxxxxxx	.....E.CC......	167.01	57/6121	9/6121	6.3	5.4e-10	473	2.5e-07
	C	xxxxxxx_C_Cxxxxxx	.......CC......	146.38	1206/6121	334/6121	3.6	1.8e-131	466	8.3e-129
	C	xxxxxLC_C_xxxxxxx	.....LCC.......	175.7	126/6121	25/6121	5	6.7e-18	477	3.2e-15
	C	xxxxxxC_C_xxxxxxK	......CC......K	137.91	113/6121	20/6121	5.7	2.1e-17	452	9.6e-15
	C	xxxHxxM_C_xxxxxxx	...H..MC.......	143.42	30/6121	1/6121	30	1.4e-08	413	6e-06
	C	xxxxxDM_C_xxxxxxx	.....DMC.......	122.32	73/6121	8/6121	9.1	1.3e-14	409	5.1e-12
	C	xxxxxxC_C_xExxxxx	......CC.E.....	102.06	50/6121	8/6121	6.3	7.3e-09	434	3.2e-06
	C	xxxxxxM_C_xxKxxxx	......MC..K....	99.41	81/6121	14/6121	5.8	5.2e-13	397	2.1e-10
	C	xxxxxIC_C_xxxxxxx	.....ICC.......	91.67	110/6121	26/6121	4.2	6.4e-14	429	2.7e-11
	C	xxxTxxM_C_xxxxxxx	...T..MC.......	74.6	27/6121	3/6121	9	4.1e-06	372	0.0015
	C	xxxxxPC_C_xxxxxxx	.....PCC.......	68.2	26/6121	3/6121	8.7	7.5e-06	408	0.003
	C	xxxxLxM_C_xxxxxxx	....L.MC.......	65.72	63/6121	11/6121	5.7	2.4e-10	369	8.8e-08
	C	LxxxxxC_C_xxxxxxx	L.....CC.......	63.5	111/6121	28/6121	4	2.6e-13	399	1e-10
	C	xxxYxxM_C_xxxxxxx	...Y..MC.......	53.81	52/6121	9/6121	5.8	8.4e-09	357	3e-06
	C	xxxxxxL_C_Kxxxxxx	......LCK......	57.93	112/6121	42/6121	2.7	6.3e-09	456	2.9e-06
	C	xYxxxxC_C_xxxxxxx	.Y....CC.......	51.47	55/6121	16/6121	3.4	1.8e-06	381	0.00067
	C	xxxxxxC_C_xxxxxxx	......CC.......	37.49	870/6121	357/6121	2.4	2.5e-55	369	9.2e-53
	C	xxxxxxM_C_Kxxxxxx	......MCK......	47.52	93/6121	18/6121	5.2	9e-14	342	3.1e-11
	C	xxxxxxS_C_Kxxxxxx	......SCK......	48.71	101/6121	37/6121	2.7	2e-08	402	8.1e-06
	C	xxxxMxx_C_xxIxxxx	....M..C..I....	49.18	44/6121	5/6121	8.8	3.6e-09	330	1.2e-06
	C	xxxxxxM_C_xxxxxxx	......MC.......	28.26	585/6121	219/6121	2.7	4.1e-42	319	1.3e-39
	C	xxxxMxx_C_xxxxxxx	....M..C.......	26.66	343/6121	200/6121	1.7	1.8e-10	307	5.6e-08
	C	xxxxxxx_C_NxxxxxK	.......CN.....K	37.51	138/6121	51/6121	2.7	6.9e-11	398	2.8e-08
	C	xxxxxxx_C_Axxxxxx	.......CA......	22.34	213/6121	113/6121	1.9	1.1e-08	278	3e-06
	C	xxxxLLS_C_xxxxxxx	....LLSC.......	35.32	24/6121	3/6121	8	2.4e-05	374	0.009
	C	xxxxxxx_C_KxxxxxK	.......CK.....K	26.4	153/6121	69/6121	2.2	6.4e-09	368	2.4e-06
	C	xxxxLxx_C_Kxxxxxx	....L..CK......	23.14	126/6121	54/6121	2.3	3.3e-08	366	1.2e-05
	C	xxxxxxS_C_xxxxxxx	......SC.......	15.81	595/6121	408/6121	1.5	4e-10	335	1.3e-07
	C	xxxxxxL_C_Nxxxxxx	......LCN......	23.23	108/6121	61/6121	1.8	0.00017	366	0.06
	C	xxxxxxL_C_xxxxxxx	......LC.......	9.28	740/6121	581/6121	1.3	2e-06	345	0.0007
	C	xxxxLxx_C_xxxxxxx	....L..C.......	8.82	784/6121	563/6121	1.4	9.7e-11	319	3.1e-08
	C	xxxxxxx_C_Kxxxxxx	.......CK......	9.1	862/6121	618/6121	1.4	7.4e-12	308	2.3e-09
	C	Mxxxxxx_C_xxxxxxx	M......C.......	8.05	244/6121	196/6121	1.2	0.011	248	0.94
	C	xxxxxxx_C_xxxxxKx	.......C.....K.	8.72	751/6121	630/6121	1.2	0.0003	274	0.079
	C	xxxxxMx_C_xxxxxxx	.....M.C.......	6.41	276/6121	216/6121	1.3	0.0033	229	0.53
	C	xMxxxxx_C_xxxxxxx	.M.....C.......	6.25	207/6121	195/6121	1.1	0.29	223	1
	C	xxMxxxx_C_xxxxxxx	..M....C.......	6.17	225/6121	172/6121	1.3	0.0039	215	0.57

## Sheet: Phosphorylation Motifs
Inputs & Settings
Algorithm
Name: motif-x
Motif Width: 13
Minimum Occurrences for Residue/Position pair: 20
Binomial probability threshold for Residue/Position pair: 0.000001
Binomial p-value calculations: accurate
Post-translationally modified peptides
File Name	File Type
global_phospeptides_13_formotifs.txt	Raw
Number of Mods: 167237
Number of Mod Types: 3
Number of Mods Passing Filters: 167237
Number of Mod Types Passing Filters: 3
Protein Database and Control Peptides
Protein Database: none provided
Control peptides from shuffled input peptides: 167219
Other Settings
filter foreground peptides?	no
remove peptides if they contain 'X'?	yes
eliminate duplicate peptides?	yes, if their 13 central residues match
generate single motif per mass?	no
random number seed	0
MoMo version
5.4.1 (Release date: Sat Aug 21 19:23:23 2021 -0700)
Reference
Alice Cheng, Charles Grant, Timothy L. Bailey and William Noble, "MoMo: Discovery of statistically significant post-translational modification motifs", Bioinformatics, 35(16):2774-2782, 2018.
Motif Logo	Mod	Motif	Regular Expression	Score	FG	BG	Fold Enrichment	Unadjusted p-value	Tests	Adjusted p-value
	S	xxxxFL_S_xxExxx	....FLS..E...	189.45	33/91300	4/91282	8.2	5.4e-07	542	0.00029
	S	xxKNIL_S_xxxxxx	..KNILS......	184.5	30/91300	3/91282	10	7e-07	607	0.00043
	S	xxxTFL_S_xxxxxx	...TFLS......	179.92	28/91300	3/91282	9.3	2.3e-06	537	0.0012
	S	xxxxIL_S_xxxxxx	....ILS......	160.85	749/91300	405/91282	1.8	9.8e-25	595	5.8e-22
	S	xxxxLL_S_xxxxxP	....LLS.....P	143.1	23/91300	1/91282	23	1.5e-06	594	0.00089
	S	NxxxFL_S_xxxxxx	N...FLS......	136.77	58/91300	12/91282	4.8	1.1e-08	530	6e-06
	S	xKxxLL_S_xxxxxK	.K..LLS.....K	133.16	25/91300	3/91282	8.3	1.4e-05	596	0.0082
	Y	xxxDDI_Y_xxxxxx	...DDIY......	118.01	87/38471	18/38471	4.8	2.4e-12	540	1.3e-09
	S	xxxxLL_S_xxxxxx	....LLS......	115.53	735/91300	421/91282	1.7	7.8e-21	586	4.6e-18
	S	xxxxNI_S_xDxNxx	....NIS.D.N..	96.91	59/91300	10/91282	5.9	6.9e-10	666	4.6e-07
	Y	YxxxxN_Y_xxxxNY	Y....NY....NY	96.31	30/38471	1/38471	30	1.5e-08	482	7.1e-06
	S	xKKKxx_S_Sxxxxx	.KKK..SS.....	93.69	65/91300	8/91282	8.1	1.6e-12	704	1.1e-09
	Y	xxxxDI_Y_xxxxxY	....DIY.....Y	93.13	45/38471	7/38471	6.4	3.5e-08	526	1.8e-05
	S	xxxxVL_S_xxxxxx	....VLS......	92.64	342/91300	186/91282	1.8	5.2e-12	519	2.7e-09
	T	xEKxxx_T_Yxxxxx	.EK...TY.....	87.5	43/37466	5/37466	8.6	6.8e-09	505	3.4e-06
	S	xVxxxx_S_VxEExx	.V....SV.EE..	87.15	47/91300	1/91282	47	1.7e-13	504	8.8e-11
	S	xxxxNI_S_xExxxx	....NIS.E....	81.62	168/91300	69/91282	2.4	5.1e-11	654	3.4e-08
	S	xxxxFL_S_xxxxxx	....FLS......	79.03	423/91300	187/91282	2.3	2.4e-22	517	1.3e-19
	S	xxMxDI_S_xxxxxx	..M.DIS......	77.94	24/91300	4/91282	6	9e-05	596	0.052
	Y	xxxxDI_Y_xxxxxx	....DIY......	77.42	564/38471	235/38471	2.4	1.3e-32	522	6.6e-30
	S	xxxxxL_S_xxExxK	.....LS..E..K	77.04	136/91300	41/91282	3.3	2.1e-13	538	1.1e-10
	S	xxxxDI_S_xCxxxx	....DIS.C....	74.69	24/91300	4/91282	6	9e-05	592	0.052
	T	xxKxxx_T_YxxxDx	..K...TY...D.	72.24	42/37466	6/37466	7	5e-08	494	2.5e-05
	Y	xxxxxT_Y_xxxxxx	.....TY......	71.61	1877/38471	1211/38471	1.5	7.4e-35	442	3.3e-32
	Y	xxDxNI_Y_xxxxxx	..D.NIY......	69.6	100/38471	28/38471	3.6	5.3e-11	565	3e-08
	S	xxxxxY_S_DDxxxx	.....YSDD....	66.47	89/91300	32/91282	2.8	1.1e-07	586	6.3e-05
	Y	YxxDxx_Y_xxxxxY	Y..D..Y.....Y	66.26	60/38471	6/38471	10	1.3e-12	474	6.3e-10
	S	NNxxSS_S_xxxxxx	NN..SSS......	65.42	161/91300	49/91282	3.3	1.9e-15	694	1.3e-12
	S	xxxxxL_S_DxSxxx	.....LSD.S...	65.11	79/91300	22/91282	3.6	5e-09	535	2.7e-06
	T	xKxxDx_T_Yxxxxx	.K..D.TY.....	64	34/37466	6/37466	5.7	4.2e-06	489	0.002
	S	xxxxDI_S_xxxxxx	....DIS......	63.95	849/91300	473/91282	1.8	1e-25	590	6.1e-23
	S	xxxKxV_S_Fxxxxx	...K.VSF.....	61.97	41/91300	6/91282	6.8	8.9e-08	539	4.8e-05
	S	xxxHIS_S_xxxxxx	...HISS......	60.22	38/91300	8/91282	4.7	4.6e-06	600	0.0028
	T	xxxxxx_T_xEHIxx	......T.EHI..	59.6	28/37466	1/37466	28	5.6e-08	496	2.8e-05
	S	xxxxNI_S_Txxxxx	....NIST.....	59.26	89/91300	33/91282	2.7	2e-07	623	0.00013
	S	xxxxxS_S_DExxxx	.....SSDE....	56.05	109/91300	42/91282	2.6	2.4e-08	595	1.4e-05
	S	xxxxLS_S_xQxxxx	....LSS.Q....	55.05	34/91300	5/91282	6.8	1.2e-06	605	0.00074
	S	xxEKxx_S_Fxxxxx	..EK..SF.....	54.57	60/91300	15/91282	4	7.9e-08	529	4.2e-05
	S	xxxWxL_S_xxxxxx	...W.LS......	54.43	32/91300	6/91282	5.3	1.2e-05	452	0.0055
	S	xxKKRx_S_xxxxxx	..KKR.S......	52.65	125/91300	43/91282	2.9	8.8e-11	525	4.6e-08
	S	NxNNxx_S_SSxxxx	N.NN..SSS....	51.89	82/91300	18/91282	4.6	3.1e-11	679	2.1e-08
	S	YxxxxL_S_xxxxxx	Y....LS......	51.74	347/91300	196/91282	1.8	4.4e-11	496	2.2e-08
	Y	YDxxxx_Y_xxxxxY	YD....Y.....Y	51.09	59/38471	11/38471	5.4	2.2e-09	456	1e-06
	Y	xxxxNI_Y_Qxxxxx	....NIYQ.....	51.08	30/38471	4/38471	7.5	3.1e-06	542	0.0017
	S	xxQxIS_S_xxxxxx	..Q.ISS......	50.66	35/91300	8/91282	4.4	2.1e-05	593	0.012
	T	xxxGSx_T_xExxxx	...GS.T.E....	50.4	52/37466	9/37466	5.8	8.9e-09	442	3.9e-06
	S	xxxxxx_S_DDxxxx	......SDD....	49.52	1049/91300	640/91282	1.6	6.3e-24	573	3.6e-21
	S	xxxNIS_S_xxxxxx	...NISS......	49.09	217/91300	112/91282	1.9	3.6e-09	617	2.2e-06
	T	Kxxxxx_T_SxxxxN	K.....TS....N	48.69	99/37466	34/37466	2.9	7.2e-09	573	4.1e-06
	S	xxxxIP_S_xxxxxx	....IPS......	48.52	252/91300	136/91282	1.9	2e-09	490	9.7e-07
	Y	xxSxxx_Y_FxxxxN	..S...YF....N	47.66	28/38471	3/38471	9.3	2.3e-06	463	0.0011
	S	xxxxNI_S_xxxxxx	....NIS......	46.41	1704/91300	1092/91282	1.6	7.6e-32	617	4.7e-29
	T	xxxPxx_T_QExxxx	...P..TQE....	45.56	23/37466	1/37466	23	1.5e-06	460	0.00068
	T	xxxxxx_T_Yxxxxx	......TY.....	45.52	1851/37466	1233/37466	1.5	2.5e-30	440	1.1e-27
	T	xxxxxx_T_NExxxM	......TNE...M	45.06	20/37466	3/37466	6.7	0.00024	548	0.13
	Y	xxxxxL_Y_DIxxxx	.....LYDI....	44.44	39/38471	7/38471	5.6	9.1e-07	495	0.00045
	S	xxxxML_S_xxxxxx	....MLS......	44.4	176/91300	97/91282	1.8	1e-06	463	0.00046
	S	xxExLP_S_xxxxxx	..E.LPS......	43.31	26/91300	3/91282	8.7	7.6e-06	483	0.0037
	S	KKKxxS_S_xxxxxx	KKK..SS......	43.31	63/91300	15/91282	4.2	1.9e-08	626	1.2e-05
	T	xxxxxx_T_IxxLLx	......TI..LL.	42.19	21/37466	3/37466	7	0.00014	480	0.064
	Y	xxxRNS_Y_xxxxxx	...RNSY......	41.8	45/38471	4/38471	11.3	4.1e-10	452	1.8e-07
	S	xxxRNV_S_xxxxxx	...RNVS......	41.25	36/91300	8/91282	4.5	1.3e-05	563	0.0071
	Y	xxxEHI_Y_xxxxxx	...EHIY......	39.67	23/38471	2/38471	11.5	9.7e-06	451	0.0044
	T	xxxxKx_T_ILxxxx	....K.TIL....	39.58	57/37466	16/37466	3.6	7.5e-07	483	0.00036
	S	xxxxxR_S_LSxxxx	.....RSLS....	39.46	47/91300	15/91282	3.1	2.9e-05	572	0.016
	Y	xxxxNV_Y_xxIxxx	....NVY..I...	39.34	30/38471	4/38471	7.5	3.1e-06	494	0.0015
	S	xxxxAP_S_xxxxxx	....APS......	39.21	91/91300	41/91282	2.2	8e-06	448	0.0036
	T	xxxxxx_T_SxxxNN	......TS...NN	38.84	167/37466	73/37466	2.3	5.6e-10	561	3.2e-07
	Y	xxxxxS_Y_Dxxxxx	.....SYD.....	38.56	441/38471	286/38471	1.5	4.2e-09	522	2.2e-06
	S	xxxKNV_S_xxxxxx	...KNVS......	38.17	124/91300	43/91282	2.9	1.3e-10	555	7.3e-08
	Y	xxxxNI_Y_xxxxxx	....NIY......	38.14	742/38471	419/38471	1.8	4.7e-22	539	2.5e-19
	T	xxxxxI_T_xDIxxx	.....IT.DI...	37.52	35/37466	9/37466	3.9	5.3e-05	477	0.025
	Y	xxxVSS_Y_xxxxxx	...VSSY......	37.45	23/38471	4/38471	5.8	0.00016	526	0.078
	S	xKRxxS_S_xxxxxx	.KR..SS......	36.98	74/91300	26/91282	2.8	8.3e-07	607	0.00051
	S	xxxxxx_S_FxNxxx	......SF.N...	36.82	589/91300	388/91282	1.5	6.2e-11	532	3.3e-08
	S	xxxxxV_S_Sxxxxx	.....VSS.....	36.77	482/91300	334/91282	1.4	1.2e-07	548	6.5e-05
	T	xxxxxx_T_IxxxLx	......TI...L.	35.65	223/37466	119/37466	1.9	9.3e-09	471	4.4e-06
	S	xxxxCP_S_xxxxxx	....CPS......	35.64	61/91300	24/91282	2.5	3.7e-05	446	0.016
	Y	KxxxxL_Y_Dxxxxx	K....LYD.....	35.29	51/38471	12/38471	4.3	3.7e-07	490	0.00018
	S	xxxxxS_S_xExxxx	.....SS.E....	35	791/91300	553/91282	1.4	4e-11	562	2.2e-08
	S	xKxKKx_S_Txxxxx	.K.KK.ST.....	34.77	32/91300	4/91282	8	9.7e-07	498	0.00048
	T	xxxxxx_T_NExxxx	......TNE....	34.69	636/37466	415/37466	1.5	3.5e-12	546	1.9e-09
	S	xxKKxT_S_xxxxxx	..KK.TS......	34.66	114/91300	46/91282	2.5	3.8e-08	549	2.1e-05
	Y	HxxxxK_Y_xDxxxx	H....KY.D....	34.29	21/38471	3/38471	7	0.00014	515	0.069
	Y	xxIxxx_Y_IxxxxI	..I...YI....I	34.26	27/38471	4/38471	6.8	1.7e-05	483	0.0081
	S	xxxxMA_S_xxxxxx	....MAS......	33.98	78/91300	28/91282	2.8	6.2e-07	444	0.00028
	S	xxxxxL_S_xxxxxx	.....LS......	33.25	7722/91300	5643/91282	1.4	2.8e-78	446	1.2e-75
	S	xxxxxI_S_SxxxxK	.....ISS....K	33.24	113/91300	50/91282	2.3	4.4e-07	577	0.00025
	T	xxQExV_T_xxxxxx	..QE.VT......	33.23	30/37466	3/37466	10	7e-07	391	0.00027
	S	xxEKxK_S_xxxxxx	..EK.KS......	31.12	208/91300	102/91282	2	8.5e-10	574	4.9e-07
	Y	xxxxxx_Y_FxxxxN	......YF....N	30.84	237/38471	108/38471	2.2	1.4e-12	458	6.4e-10
	Y	xxxxEK_Y_xxxIxx	....EKY...I..	30.7	55/38471	18/38471	3.1	8.4e-06	530	0.0044
	Y	xxxxxx_Y_FxExxK	......YF.E..K	30.58	32/38471	5/38471	6.4	3.7e-06	429	0.0016
	S	xxxxLS_S_xxxxxN	....LSS.....N	30.56	137/91300	66/91282	2.1	3.5e-07	635	0.00022
	Y	xxxKRK_Y_xxxxxx	...KRKY......	29.81	92/38471	41/38471	2.2	5.7e-06	482	0.0027
	Y	xxxxEN_Y_Mxxxxx	....ENYM.....	29.33	30/38471	8/38471	3.8	0.00024	532	0.12
	Y	KRKxxx_Y_xxxxxx	KRK...Y......	29.32	97/38471	35/38471	2.8	3.1e-08	363	1.1e-05
	Y	xxxxxx_Y_xxxxIY	......Y....IY	29.26	192/38471	77/38471	2.5	7.6e-13	452	3.5e-10
	S	xxxxxK_S_Vxxxxx	.....KSV.....	28.93	499/91300	338/91282	1.5	1.4e-08	538	7.4e-06
	Y	xxxxKK_Y_xxxVxx	....KKY...V..	28.9	34/38471	15/38471	2.3	0.0047	556	0.93
	T	xxxxxx_T_Fxxxxx	......TF.....	28.76	1402/37466	1043/37466	1.3	8.3e-14	436	3.6e-11
	Y	xxYxxK_Y_xDxxxx	..Y..KY.D....	28.54	35/38471	9/38471	3.9	5.3e-05	506	0.026
	S	DxxKxG_S_xxxxxx	D..K.GS......	28.49	40/91300	10/91282	4	1.2e-05	497	0.0059
	Y	xxxxxF_Y_ExxxNx	.....FYE...N.	28.43	27/38471	5/38471	5.4	5.6e-05	364	0.02
	S	xxxxFx_S_DIxxxx	....F.SDI....	28	35/91300	15/91282	2.3	0.0033	483	0.8
	S	xxxxxx_S_LSxxxx	......SLS....	27.84	803/91300	550/91282	1.5	2.7e-12	559	1.5e-09
	Y	xxxxSS_Y_xxxxxx	....SSY......	27.47	524/38471	357/38471	1.5	8.4e-09	520	4.4e-06
	Y	xxxxHA_Y_xxxxxx	....HAY......	27.26	36/38471	9/38471	4	3.3e-05	409	0.013
	T	xxxxxx_T_Cxxxxx	......TC.....	26.95	624/37466	402/37466	1.6	1.5e-12	363	5.6e-10
	S	SVxxxx_S_Vxxxxx	SV....SV.....	26.81	40/91300	13/91282	3.1	0.00013	435	0.057
	T	xxxxxx_T_LSxxxx	......TLS....	26.81	311/37466	200/37466	1.6	4.8e-07	495	0.00024
	Y	xxxxxx_Y_IPxxxx	......YIP....	26.59	100/38471	46/38471	2.2	4.5e-06	449	0.002
	S	xxxxxx_S_FxKxxx	......SF.K...	26.55	506/91300	325/91282	1.6	1.7e-10	516	8.8e-08
	S	xxxxxG_S_AxExxx	.....GSA.E...	26.54	21/91300	2/91282	10.5	3.3e-05	436	0.014
	S	xxxxxx_S_VSSxxx	......SVSS...	26.53	75/91300	29/91282	2.6	3.7e-06	493	0.0018
	Y	xxxxxD_Y_Mxxxxx	.....DYM.....	26.53	113/38471	54/38471	2.1	2.8e-06	416	0.0012
	T	xxxxxx_T_xDExxx	......T.DE...	26.37	391/37466	224/37466	1.7	6.8e-12	478	3.3e-09
	T	xxxxxx_T_Hxxxxx	......TH.....	26.24	1250/37466	944/37466	1.3	1.8e-11	433	7.8e-09
	Y	xxxxxx_Y_VHxxxx	......YVH....	26.16	59/38471	21/38471	2.8	1.3e-05	434	0.0054
	S	xxKRxx_S_Ixxxxx	..KR..SI.....	25.81	71/91300	25/91282	2.8	1.4e-06	374	0.00054
	Y	xxxTxx_Y_Axxxxx	...T..YA.....	25.7	41/38471	11/38471	3.7	1.8e-05	404	0.0072
	S	xxxxxx_S_SFxxxx	......SSF....	25.31	413/91300	281/91282	1.5	3e-07	500	0.00015
	S	xxxxxS_S_xxxxxK	.....SS.....K	25.2	1225/91300	948/91282	1.3	1.3e-09	608	7.7e-07
	T	xxKKKx_T_xxxxxx	..KKK.T......	25.05	270/37466	133/37466	2	3.5e-12	529	1.8e-09
	S	xxxxxx_S_NIxxxx	......SNI....	24.33	1411/91300	1072/91282	1.3	4.1e-12	577	2.4e-09
	S	xxxxxV_S_Pxxxxx	.....VSP.....	24.17	127/91300	70/91282	1.8	3e-05	452	0.013
	Y	xxxxxx_Y_ISxxxx	......YIS....	24.14	345/38471	235/38471	1.5	2.6e-06	495	0.0013
	Y	xxxxHI_Y_xxxxxx	....HIY......	23.93	135/38471	61/38471	2.2	6.4e-08	438	2.8e-05
	Y	xIxxxx_Y_SDxxxx	.I....YSD....	23.84	30/38471	14/38471	2.1	0.011	460	0.99
	S	xxxxxP_S_xxxxxx	.....PS......	23.75	2414/91300	1834/91282	1.3	1.2e-19	445	5.2e-17
	T	xxxxxS_T_Txxxxx	.....STT.....	23.65	276/37466	182/37466	1.5	6.1e-06	483	0.003
	S	xxxxxx_S_xDIxxx	......S.DI...	23.44	823/91300	497/91282	1.7	9.4e-20	483	4.6e-17
	S	Exxxxx_S_xEQxxx	E.....S.EQ...	23.32	33/91300	10/91282	3.3	0.0003	431	0.12
	S	xxxxxx_S_DIYxxx	......SDIY...	23.18	57/91300	18/91282	3.2	3.6e-06	478	0.0017
	T	xxxxxx_T_NDDxxx	......TNDD...	23.07	80/37466	41/37466	2	0.00025	479	0.11
	Y	xxxxxM_Y_xxxFxx	.....MY...F..	22.67	38/38471	13/38471	2.9	0.00031	390	0.11
	Y	xxFxxA_Y_xxxxxx	..F..AY......	22.52	35/38471	13/38471	2.7	0.001	355	0.31
	Y	xxIxxA_Y_xxxxxx	..I..AY......	22.25	74/38471	33/38471	2.2	4.5e-05	394	0.018
	T	xxxxxx_T_Sxxxxx	......TS.....	22.23	4022/37466	3560/37466	1.1	1.2e-08	444	5.2e-06
	S	xxxxTI_S_xxxxxx	....TIS......	21.71	308/91300	229/91282	1.3	0.00037	473	0.16
	T	xxxxxx_T_Pxxxxx	......TP.....	21.68	1045/37466	811/37466	1.3	2.1e-08	427	8.9e-06
	S	xxxxxV_S_xxxGxx	.....VS...G..	21.56	180/91300	106/91282	1.7	7.1e-06	445	0.0032
	S	xxxxHI_S_xxxxxx	....HIS......	21.2	284/91300	181/91282	1.6	1e-06	471	0.00047
	S	xxxxxx_S_VCxxxx	......SVC....	20.91	73/91300	25/91282	2.9	6.4e-07	426	0.00027
	T	xxxxxx_T_Qxxxxx	......TQ.....	20.81	1463/37466	1244/37466	1.2	9.8e-06	431	0.0042
	T	xxxxxx_T_xDIxxx	......T.DI...	20.72	370/37466	209/37466	1.8	9.2e-12	464	4.3e-09
	T	Mxxxxx_T_xRxxxx	M.....T.R....	20.38	48/37466	19/37466	2.5	0.00026	409	0.1
	S	xxxxYI_S_xDxxxx	....YIS.D....	20.22	53/91300	21/91282	2.5	0.00013	471	0.059
	S	xxxxRx_S_Lxxxxx	....R.SL.....	19.66	275/91300	181/91282	1.5	6.1e-06	455	0.0028
	T	xxxxxx_T_KRxxxx	......TKR....	19.47	279/37466	182/37466	1.5	3.4e-06	450	0.0015
	T	xxxxxx_T_Ixxxxx	......TI.....	19.45	2932/37466	2575/37466	1.1	3.1e-07	442	0.00014
	Y	xxxxxx_Y_MxxxxI	......YM....I	19.29	75/38471	29/38471	2.6	3.6e-06	307	0.0011
	T	xxxxxx_T_xExIxx	......T.E.I..	19.22	357/37466	192/37466	1.9	7.3e-13	436	3.2e-10
	S	CxxxxG_S_xxxxxx	C....GS......	19.04	53/91300	23/91282	2.3	0.00038	436	0.15
	Y	xxxxxx_Y_DDxxxx	......YDD....	18.98	696/38471	472/38471	1.5	2.1e-11	481	1e-08
	S	xxxxxV_S_xxxxMx	.....VS....M.	18.94	97/91300	61/91282	1.6	0.0026	437	0.68
	S	xxxxxA_S_xxxxxx	.....AS......	18.85	2075/91300	1739/91282	1.2	2.1e-08	443	9.5e-06
	Y	NxxxxK_Y_xxxxxx	N....KY......	18.79	823/38471	685/38471	1.2	0.00018	534	0.092
	S	xxxxxx_S_VHxxxx	......SVH....	18.63	152/91300	71/91282	2.1	3e-08	433	1.3e-05
	Y	xxxxxV_Y_xxxxxx	.....VY......	18.04	1410/38471	1138/38471	1.2	2.3e-08	436	1e-05
	Y	xxxxxx_Y_LSxxxx	......YLS....	17.91	311/38471	196/38471	1.6	1.7e-07	418	7.1e-05
	S	xxxxxx_S_NVxxxx	......SNV....	17.49	686/91300	477/91282	1.4	4.4e-10	468	2e-07
	S	xxxxxx_S_TTxxxx	......STT....	17.31	280/91300	201/91282	1.4	0.00018	452	0.079
	Y	xxxxxx_Y_SxxxQx	......YS...Q.	17.2	101/38471	68/38471	1.5	0.0067	419	0.94
	Y	xxxxGx_Y_xNxxxx	....G.Y.N....	17.13	198/38471	122/38471	1.6	1.2e-05	313	0.0038
	S	xxxxxM_S_Dxxxxx	.....MSD.....	17	215/91300	140/91282	1.5	4e-05	448	0.018
	Y	xxxxxL_Y_xxxxxx	.....LY......	16.71	2254/38471	1942/38471	1.2	3.9e-07	439	0.00017
	Y	xxxxxx_Y_Vxxxxx	......YV.....	16.67	1390/38471	1130/38471	1.2	7.6e-08	425	3.2e-05
	Y	xxxxYF_Y_xxxxxx	....YFY......	16.57	58/38471	31/38471	1.9	0.0028	356	0.63
	Y	xxxxEx_Y_xxxxxx	....E.Y......	16.54	3701/38471	3456/38471	1.1	0.0012	430	0.41
	Y	xxxxxx_Y_EQxxxx	......YEQ....	16.52	211/38471	97/38471	2.2	3.4e-11	420	1.4e-08
	Y	xxxxxx_Y_Axxxxx	......YA.....	16.52	883/38471	652/38471	1.4	1.4e-09	388	5.5e-07
	S	xxxxxx_S_Yxxxxx	......SY.....	15.83	4043/91300	3640/91282	1.1	1.4e-06	443	0.00064
	S	xxExxK_S_xxxxxx	..E..KS......	15.67	1003/91300	800/91282	1.3	8.7e-07	534	0.00046
	S	xxxxxx_S_Sxxxxx	......SS.....	15.63	10779/91300	9797/91282	1.1	2.1e-13	444	9.5e-11
	Y	xxxxxP_Y_xxxxxx	.....PY......	15.45	754/38471	649/38471	1.2	0.0025	362	0.6
	Y	xxxxxS_Y_xxxxxx	.....SY......	14.9	4021/38471	3471/38471	1.2	1.2e-11	440	5.3e-09
	Y	xxxxxM_Y_xxxxxx	.....MY......	14.53	935/38471	788/38471	1.2	0.00019	381	0.068
	Y	xxxxxx_Y_Fxxxxx	......YF.....	14.51	1303/38471	970/38471	1.3	7.2e-13	385	2.8e-10
	S	xxHxxx_S_xHxxxx	..H...S.H....	14.45	124/91300	63/91282	2	4.8e-06	350	0.0017
	S	xxxxxx_S_DVxxxx	......SDV....	14.27	334/91300	229/91282	1.5	5.4e-06	427	0.0023
	T	xxxxIF_T_xxxxxx	....IFT......	14.25	148/37466	62/37466	2.4	1.3e-09	365	4.7e-07
	Y	xxxxxA_Y_xxxxxx	.....AY......	14.2	854/38471	659/38471	1.3	2.3e-07	347	7.9e-05
	Y	xxxxxx_Y_xxxGxY	......Y...G.Y	14.07	89/38471	41/38471	2.2	1.5e-05	349	0.0053
	Y	xxxxxx_Y_DExxxx	......YDE....	13.92	587/38471	392/38471	1.5	1.9e-10	466	9e-08
	Y	xxxxxI_Y_xxxxxx	.....IY......	13.75	3477/38471	2626/38471	1.3	3.4e-30	429	1.5e-27
	T	xxxxEH_T_xxxxxx	....EHT......	13.52	123/37466	70/37466	1.8	8.2e-05	416	0.033
	S	xxNxMx_S_xxxxxx	..N.M.S......	13.34	460/91300	315/91282	1.5	1e-07	350	3.6e-05
	S	xxxxxx_S_NTxxxx	......SNT....	13.26	638/91300	557/91282	1.1	0.01	463	0.99
	Y	Yxxxxx_Y_xxxxxL	Y.....Y.....L	13.19	98/38471	47/38471	2.1	1.4e-05	361	0.0049
	S	xxxxxx_S_Fxxxxx	......SF.....	12.68	3578/91300	2872/91282	1.2	2e-19	436	8.6e-17
	Y	xxxxxx_Y_Ixxxxx	......YI.....	12.62	3015/38471	2591/38471	1.2	2.2e-09	408	8.9e-07
	S	xxxxxS_S_xxxxxx	.....SS......	12.57	10814/91300	9885/91282	1.1	4.1e-12	438	1.8e-09
	S	xxxxxT_S_xxxxxx	.....TS......	12.48	4052/91300	3772/91282	1.1	0.00065	440	0.25
	S	xxxxxC_S_xxxxxx	.....CS......	11.78	1297/91300	1138/91282	1.1	0.00064	413	0.23
	S	xxxxxV_S_xxxxxx	.....VS......	11.03	3880/91300	3369/91282	1.2	5.1e-10	433	2.2e-07
	S	xxxxxI_S_xxxxxx	.....IS......	10.19	7643/91300	6714/91282	1.1	3.8e-16	422	1.6e-13
	S	xxxxxx_S_Lxxxxx	......SL.....	9.32	6192/91300	5710/91282	1.1	2.7e-06	431	0.0012
	S	xxxxxG_S_xxxxxx	.....GS......	9.04	2946/91300	2711/91282	1.1	0.00081	430	0.29
	T	xxxxxx_T_xGxxxx	......T.G....	9.03	1261/37466	1152/37466	1.1	0.013	388	0.99
	Y	xxxxxx_Y_Mxxxxx	......YM.....	8.97	1057/38471	790/38471	1.3	1.7e-10	303	5.3e-08
	T	xxxxxx_T_Lxxxxx	......TL.....	8.57	2199/37466	2104/37466	1	0.07	429	1
	S	xxxxxM_S_xxxxxx	.....MS......	8.01	1985/91300	1885/91282	1.1	0.055	404	1
	S	xxxxxK_S_xxxxxx	.....KS......	7.95	9982/91300	10455/91282	1	1	435	1
	S	xxxxxx_S_Vxxxxx	......SV.....	7.94	3738/91300	3292/91282	1.1	3.2e-08	415	1.3e-05
	S	xxxxxH_S_xxxxxx	.....HS......	7.73	2299/91300	2253/91282	1	0.25	424	1
	S	xxxxxx_S_Pxxxxx	......SP.....	7.72	2035/91300	1783/91282	1.1	2.1e-05	409	0.0084
	T	xxxxxC_T_xxxxxx	.....CT......	6.69	564/37466	432/37466	1.3	1.4e-05	286	0.0041
	T	xxxxxS_T_xxxxxx	.....ST......	6.66	4091/37466	3581/37466	1.1	4.2e-10	423	1.8e-07
	Y	xxxSxx_Y_xxxxxx	...S..Y......	6.03	3793/38471	3632/38471	1	0.025	409	1
