# Supplementary material for: Complementary crosstalk between palmitoylation and phosphorylation events in MTIP regulates its role during Plasmodium falciparum invasion
Source: Front Cell Infect Microbiol. 2022 Sep 29;12:924424. doi: 10.3389/fcimb.2022.924424 (PMC9556994; doi:10.3389/fcimb.2022.924424)
Supplement: Supplementary Table 6 — A catalog of all the “Dually Modifiable” and “Dually Modified” Plasmodium falciparum 3D7 proteins. [file Table_6.xlsx]

## Sheet: PF3D7_DuallyModifiableProteins
Protein	Name	Product
PF3D7_1325100	N/A	phosphoribosylpyrophosphate synthetase
PF3D7_0205900	RPN1	26S proteasome regulatory subunit RPN1, putative
PF3D7_0218500	SNRPD2	small nuclear ribonucleoprotein Sm D2, putative
PF3D7_0221200	N/A	Plasmodium exported protein (hyp15), unknown function
PF3D7_0305600	APE1	DNA-(apurinic or apyrimidinic site) endonuclease
PF3D7_0306900	N/A	40S ribosomal protein S23, putative
PF3D7_0316700	YOP1	protein YOP1, putative
PF3D7_0317600	RPS11	40S ribosomal protein S11, putative
PF3D7_0322000	CYP19A	peptidyl-prolyl cis-trans isomerase
PF3D7_0406100	N/A	V-type proton ATPase subunit B
PF3D7_0416400	HAT1	histone acetyltransferase, putative
PF3D7_0501200	PIESP2	parasite-infected erythrocyte surface protein
PF3D7_0503400	ADF1	actin-depolymerizing factor 1
PF3D7_0508300	TPT	triose phosphate transporter
PF3D7_0513300	PNP	purine nucleoside phosphorylase
PF3D7_0515700	GAP40	glideosome-associated protein 40, putative
PF3D7_0517000	N/A	60S ribosomal protein L12, putative
PF3D7_0523400	N/A	DnaJ protein, putative
PF3D7_0532100	ETRAMP5	early transcribed membrane protein 5
PF3D7_0608800	OAT	ornithine aminotransferase
PF3D7_0611600	BTP1	basal complex transmembrane protein 1
PF3D7_0613300	ROP14	rhoptry protein ROP14
PF3D7_0617200	N/A	BFR1 domain-containing protein, putative
PF3D7_0617800	H2A	histone H2A
PF3D7_0617900	H3.3	histone H3 variant
PF3D7_0619400	N/A	cell division cycle protein 48 homologue, putative
PF3D7_0627500	DJ1	protein DJ-1
PF3D7_0704300	N/A	conserved Plasmodium membrane protein, unknown function
PF3D7_0707300	RAMA	rhoptry-associated membrane antigen
PF3D7_0708800	HSP110c	heat shock protein 110
PF3D7_0709000	CRT	chloroquine resistance transporter
PF3D7_0716800	EIF3I	eukaryotic translation initiation factor 3 subunit I, putative
PF3D7_0719500	CDC50A	LEM3/CDC50 family protein, putative
PF3D7_0721600	N/A	40S ribosomal protein S5, putative
PF3D7_0730400	IMP2	IMP1-like protein, putative
PF3D7_0807900	TyrRS	tyrosine--tRNA ligase
PF3D7_0810300	PPM5	protein phosphatase PPM5, putative
PF3D7_0813400	N/A	conserved protein, unknown function
PF3D7_0818900	HSP70	heat shock protein 70
PF3D7_0819600	N/A	ubiquitin-like protein, putative
PF3D7_0820500	YIF1	protein transport protein YIF1, putative
PF3D7_0823800	N/A	DnaJ protein, putative
PF3D7_0824400	NT2	nucleoside transporter 2
PF3D7_0827900	PDI8	protein disulfide-isomerase
PF3D7_0905400	RhopH3	high molecular weight rhoptry protein 3
PF3D7_0914700	MFR4	major facilitator superfamily-related transporter, putative
PF3D7_0917600	PRP43	pre-mRNA-splicing factor ATP-dependent RNA helicase PRP43, putative
PF3D7_0917900	BIP	heat shock protein 70
PF3D7_0919100	N/A	DnaJ protein, putative
PF3D7_0920800	IMPDH	inosine-5'-monophosphate dehydrogenase
PF3D7_0922500	PGK	phosphoglycerate kinase
PF3D7_0932000	N/A	conserved Plasmodium protein, unknown function
PF3D7_0936800	N/A	Plasmodium exported protein (PHISTc), unknown function
PF3D7_1002900	N/A	conserved Plasmodium protein, unknown function
PF3D7_1006800	GBP2	G-strand-binding protein 2
PF3D7_1007900	EIF3D	eukaryotic translation initiation factor 3 subunit D, putative
PF3D7_1015600	HSP60	heat shock protein 60
PF3D7_1015900	ENO	enolase
PF3D7_1016300	GBP130	GBP130 protein
PF3D7_1020900	ARF1	ADP-ribosylation factor 1
PF3D7_1037300	AAC1	ADP,ATP carrier protein 1
PF3D7_1104100	SYN13	syntaxin, Qa-SNARE family
PF3D7_1105800	N/A	conserved Apicomplexan protein, unknown function
PF3D7_1107400	RAD51	DNA repair protein RAD51
PF3D7_1116000	RON4	rhoptry neck protein 4
PF3D7_1116500	FT2	folate transporter 2
PF3D7_1117700	RAN	GTP-binding nuclear protein RAN/TC4
PF3D7_1119000	N/A	acyl-CoA-binding protein, putative
PF3D7_1127000	N/A	protein phosphatase, putative
PF3D7_1127600	N/A	CRAL/TRIO domain-containing protein, putative
PF3D7_1146200	N/A	conserved Plasmodium protein, unknown function
PF3D7_1203700	NAPL	nucleosome assembly protein
PF3D7_1204300	EIF5A	eukaryotic translation initiation factor 5A
PF3D7_1211700	MCM5	DNA replication licensing factor MCM5, putative
PF3D7_1224300	PABP1	polyadenylate-binding protein 1, putative
PF3D7_1229500	CCT3	T-complex protein 1 subunit gamma
PF3D7_1308300	RPS27	40S ribosomal protein S27
PF3D7_1315500	N/A	conserved protein, unknown function
PF3D7_1317800	RPS19	40S ribosomal protein S19
PF3D7_1318800	SEC63	translocation protein SEC63, putative
PF3D7_1324900	LDH	L-lactate dehydrogenase
PF3D7_1332600	APN1	DNA-(apurinic or apyrimidinic site) lyase 1
PF3D7_1343000	PMT	phosphoethanolamine N-methyltransferase
PF3D7_1343700	Kelch13	kelch protein K13
PF3D7_1345600	N/A	inner membrane complex protein
PF3D7_1347500	ALBA4	DNA/RNA-binding protein Alba 4
PF3D7_1353800	N/A	proteasome subunit alpha type-4, putative
PF3D7_1357000	N/A	elongation factor 1-alpha
PF3D7_1407100	NOP1	rRNA 2'-O-methyltransferase fibrillarin, putative
PF3D7_1407800	PM4	plasmepsin IV
PF3D7_1407900	PMI	plasmepsin I
PF3D7_1408100	PMIII	plasmepsin III
PF3D7_1408600	N/A	40S ribosomal protein S8e, putative
PF3D7_1409400	N/A	conserved protein, unknown function
PF3D7_1410400	RAP1	rhoptry-associated protein 1
PF3D7_1410600	eIF2gamma	eukaryotic translation initiation factor 2 subunit gamma, putative
PF3D7_1416600	N/A	conserved Plasmodium protein, unknown function
PF3D7_1417500	CBF5	H/ACA ribonucleoprotein complex subunit 4, putative
PF3D7_1426100	BTF3	transcription factor BTF3, putative
PF3D7_1429600	GEXP03	conserved Plasmodium protein, unknown function
PF3D7_1436000	GPI	glucose-6-phosphate isomerase
PF3D7_1437900	HSP40	HSP40, subfamily A
PF3D7_1438900	Trx-Px1	thioredoxin peroxidase 1
PF3D7_1439800	N/A	vesicle-associated membrane protein, putative
PF3D7_1439900	TIM	triosephosphate isomerase
PF3D7_1441400	FACT-S	FACT complex subunit SSRP1, putative
PF3D7_1444800	FBPA	fructose-bisphosphate aldolase
PF3D7_1447900	MDR2	multidrug resistance protein 2
PF3D7_1451800	SORTLR	sortilin
PF3D7_1452000	RON2	rhoptry neck protein 2
PF3D7_1452500	STX6	syntaxin-6, putative
PF3D7_1457000	SPP	signal peptide peptidase
PF3D7_1460700	RPL27	60S ribosomal protein L27
PF3D7_1462800	GAPDH	glyceraldehyde-3-phosphate dehydrogenase
PF3D7_1471100	EXP2	exported protein 2
PF3D7_1471200	SulP	inorganic anion exchanger, inorganic anion antiporter
PF3D7_1471400	N/A	diacylglycerol kinase, putative
PF3D7_0202200	PTP1	EMP1-trafficking protein
PF3D7_0815500	N/A	conserved Plasmodium protein, unknown function
PF3D7_0910900	N/A	DNA primase large subunit, putative
PF3D7_0923000	RPB3	DNA-directed RNA polymerase II subunit RPB3, putative
PF3D7_1019400	N/A	60S ribosomal protein L30e, putative
PF3D7_1028400	N/A	ribosome biogenesis protein RPF2, putative
PF3D7_1239700	FTSH1	ATP-dependent zinc metalloprotease FTSH 1
PF3D7_1331300	SEC11	signal peptidase complex catalytic subunit SEC11
PF3D7_0102600	FIKK1	serine/threonine protein kinase, FIKK family
PF3D7_0220800	CLAG2	cytoadherence linked asexual protein 2
PF3D7_0309600	PfP2	60S acidic ribosomal protein P2
PF3D7_0320800	DOZI	ATP-dependent RNA helicase DDX6
PF3D7_0405600	N/A	TMEM33 domain-containing protein, putative
PF3D7_0418500	BET3	trafficking protein particle complex subunit 3, putative
PF3D7_0929400	RhopH2	high molecular weight rhoptry protein 2
PF3D7_1022300	ZIPCO	ZIP domain-containing protein, putative
PF3D7_1101700	MC-2TM	Pfmc-2TM Maurer's cleft two transmembrane protein
PF3D7_1201100	N/A	RESA-like protein with PHIST and DnaJ domains
PF3D7_1334500	MSRP6	MSP7-like protein
PF3D7_1406800	GAPM3	glideosome associated protein with multiple membrane spans 3
PF3D7_1420700	P113	surface protein P113
PF3D7_1454400	APP	aminopeptidase P
PF3D7_0105600	N/A	FtsJ-like methyltransferase, putative
PF3D7_0201500	N/A	Plasmodium exported protein (hyp9), unknown function
PF3D7_0206900	MSP5	merozoite surface protein 5
PF3D7_0208300	N/A	conserved Plasmodium protein, unknown function
PF3D7_0217700	N/A	E2F-associated phosphoprotein, putative
PF3D7_0222100	MC-2TM	Pfmc-2TM Maurer's cleft two transmembrane protein
PF3D7_0302000	PRP46	pre-mRNA-splicing factor PRP46, putative
PF3D7_0302200	CLAG3.2	cytoadherence linked asexual protein 3.2
PF3D7_0304000	IMC1a	inner membrane complex protein 1a, putative
PF3D7_0304400	RPL44	60S ribosomal protein L44
PF3D7_0314600	N/A	conserved protein, unknown function
PF3D7_0317900	N/A	conserved protein, unknown function
PF3D7_0319400	N/A	kinesin-8X
PF3D7_0403400	N/A	conserved Plasmodium protein, unknown function
PF3D7_0404600	N/A	conserved Plasmodium membrane protein, unknown function
PF3D7_0406500	N/A	NYN domain-containing protein, putative
PF3D7_0407600	N/A	conserved Plasmodium protein, unknown function
PF3D7_0408100	N/A	conserved Plasmodium protein, unknown function
PF3D7_0412700	VAR	erythrocyte membrane protein 1, PfEMP1
PF3D7_0422700	EIF4A3	eukaryotic initiation factor 4A-III, putative
PF3D7_0502300	N/A	conserved Plasmodium protein, unknown function
PF3D7_0509900	N/A	NSE4 domain-containing protein, putative
PF3D7_0511300	N/A	MORN repeat protein, putative
PF3D7_0514100	UvrD	ATP-dependent DNA helicase UvrD
PF3D7_0518900	N/A	conserved protein, unknown function
PF3D7_0600200	VAR	erythrocyte membrane protein 1, PfEMP1
PF3D7_0612400	N/A	conserved Plasmodium protein, unknown function
PF3D7_0619800	N/A	conserved Plasmodium membrane protein, unknown function
PF3D7_0620500	N/A	cleavage stimulation factor subunit 1, putative
PF3D7_0621400	ALV7	Pf77 protein
PF3D7_0622200	MIAB	tRNA-2-methylthio-N(6)-dimethylallyladenosine synthase
PF3D7_0630900	HAS1	ATP-dependent RNA helicase HAS1
PF3D7_0632500	VAR	erythrocyte membrane protein 1, PfEMP1
PF3D7_0703500	N/A	erythrocyte membrane-associated antigen
PF3D7_0709900	N/A	hydrolase, putative
PF3D7_0712000	VAR	erythrocyte membrane protein 1, PfEMP1
PF3D7_0712600	VAR	erythrocyte membrane protein 1, PfEMP1
PF3D7_0716100	SDA1	protein SDA1, putative
PF3D7_0716300	N/A	conserved protein, unknown function
PF3D7_0717800	N/A	conserved Plasmodium protein, unknown function
PF3D7_0725100	N/A	conserved Plasmodium membrane protein, unknown function
PF3D7_0802300	PWP2	periodic tryptophan protein 2, putative
PF3D7_0806100	N/A	conserved Plasmodium protein, unknown function
PF3D7_0806700	N/A	conserved Plasmodium membrane protein, unknown function
PF3D7_0809100	VAR	erythrocyte membrane protein 1, PfEMP1
PF3D7_0816500	HSP20	small heat shock protein HSP20, putative
PF3D7_0821100	PK1	protein kinase 1
PF3D7_0824600	DRE2	Fe-S cluster assembly protein DRE2, putative
PF3D7_0831400	N/A	Plasmodium exported protein, unknown function
PF3D7_0903600	N/A	conserved protein, unknown function
PF3D7_0905700	ATG3	autophagy-related protein 3, putative
PF3D7_0908500	N/A	conserved Plasmodium protein, unknown function
PF3D7_0909000	N/A	conserved Plasmodium protein, unknown function
PF3D7_0919500	MFS3	major facilitator superfamily domain-containing protein, putative
PF3D7_0921200	N/A	conserved Plasmodium membrane protein, unknown function
PF3D7_0925800	UPF2	regulator of nonsense transcripts 2, putative
PF3D7_0927700	PPP4	serine/threonine protein phosphatase 4, putative
PF3D7_0931100	N/A	nucleolar protein Nop52, putative
PF3D7_1009200	N/A	ribonuclease, putative
PF3D7_1016900	ETRAMP10.3	early transcribed membrane protein 10.3
PF3D7_1017900	RPN5	26S proteasome regulatory subunit p55, putative
PF3D7_1020300	N/A	cytoplasmic dynein intermediate chain, putative
PF3D7_1023800	N/A	conserved Plasmodium protein, unknown function
PF3D7_1024100	N/A	conserved Plasmodium protein, unknown function
PF3D7_1031700	I3	protein phosphatase inhibitor 3
PF3D7_1038800	N/A	RESA-like protein with PHIST and DnaJ domains
PF3D7_1101300	RIF	rifin
PF3D7_1113900	MAPK2	mitogen-activated protein kinase 2
PF3D7_1124200	N/A	thioredoxin-like protein, putative
PF3D7_1127100	dUTPase	deoxyuridine 5'-triphosphate nucleotidohydrolase
PF3D7_1134600	N/A	zinc finger protein, putative
PF3D7_1145000	N/A	conserved Plasmodium protein, unknown function
PF3D7_1202300	N/A	dynein heavy chain, putative
PF3D7_1204100	N/A	conserved Plasmodium protein, unknown function
PF3D7_1221400	IMC1h	inner membrane complex protein 1h, putative
PF3D7_1226000	N/A	conserved protein, unknown function
PF3D7_1226500	N/A	heptatricopeptide repeat and RAP domain-containing protein, putative
PF3D7_1319900	N/A	conserved Plasmodium protein, unknown function
PF3D7_1321600	PDEgamma	cGMP-specific 3',5'-cyclic phosphodiesterase gamma, putative
PF3D7_1322600	N/A	conserved Plasmodium protein, unknown function
PF3D7_1330500	N/A	CTLH domain-containing protein, putative
PF3D7_1335800	N/A	conserved Plasmodium protein, unknown function
PF3D7_1341800	IMC1k	inner membrane complex protein 1k, putative
PF3D7_1344300	N/A	zinc finger protein, putative
PF3D7_1348400	N/A	conserved Plasmodium membrane protein, unknown function
PF3D7_1355700	NIF3	NLI interacting factor-like phosphatase, putative
PF3D7_1361400	ADF2	actin-depolymerizing factor 2
PF3D7_1361800	GAC	glideosome-associated connector
PF3D7_1364300	PRP16	pre-mRNA-splicing factor ATP-dependent RNA helicase PRP16
PF3D7_1367400	N/A	conserved Plasmodium protein, unknown function
PF3D7_1402700	SR140	U2 snRNP-associated SURP motif-containing protein, putative
PF3D7_1403000	N/A	radial spoke protein 3, putative
PF3D7_1409200	N/A	conserved Plasmodium protein, unknown function
PF3D7_1428000	N/A	conserved Plasmodium membrane protein, unknown function
PF3D7_1433300	RBAP46	histone-binding protein RBBP7, putative
PF3D7_1435800	ERA	GTPase Era, putative
PF3D7_1445600	N/A	RNA-binding protein, putative
PF3D7_1447500	IMC20	inner membrane complex protein, putative
PF3D7_1451400	Sir2B	transcriptional regulatory protein sir2b
PF3D7_1451900	TSR1	ribosome biogenesis protein TSR1, putative
PF3D7_1453900	N/A	conserved Plasmodium protein, unknown function
PF3D7_1455100	PTP1	protein tyrosine phosphatase, putative
PF3D7_1459200	N/A	WD repeat-containing protein, putative
PF3D7_1460800	SNAPC3	snRNA-activating protein complex subunit 3, putative
PF3D7_1463500	N/A	fam-a protein
PF3D7_0102500	EBA181	erythrocyte binding antigen-181
PF3D7_0103400	N/A	zinc-carboxypeptidase, putative
PF3D7_0104300	UBP1	ubiquitin carboxyl-terminal hydrolase 1, putative
PF3D7_0105700	N/A	asparagine-rich antigen Pfa35-2
PF3D7_0106100	N/A	V-type proton ATPase subunit C, putative
PF3D7_0106300	ATP6	calcium-transporting ATPase
PF3D7_0108300	ARP	conserved Plasmodium protein, unknown function
PF3D7_0108700	PSOP24	secreted ookinete protein, putative
PF3D7_0108800	N/A	mitochondrial carrier protein, putative
PF3D7_0110400	RPB9	DNA-directed RNA polymerase II subunit RPB9, putative
PF3D7_0110500	BDP3	bromodomain protein 3, putative
PF3D7_0110600	PIP5K	phosphatidylinositol-4-phosphate 5-kinase
PF3D7_0111000	N/A	kinesin-8B, putative
PF3D7_0111400	GEXP19	conserved Plasmodium protein, unknown function
PF3D7_0111600	N/A	conserved Plasmodium protein, unknown function
PF3D7_0112200	MRP1	multidrug resistance-associated protein 1
PF3D7_0113000	GARP	glutamic acid-rich protein GARP
PF3D7_0113200	N/A	Plasmodium exported protein, unknown function
PF3D7_0114100	MC-2TM	Pfmc-2TM Maurer's cleft two transmembrane protein
PF3D7_0201700	N/A	DnaJ protein, putative
PF3D7_0202100	LSAP2	liver stage associated protein 2
PF3D7_0202600	N/A	nucleic acid-binding protein, putative
PF3D7_0203000	ROPE	repetitive organellar protein, putative
PF3D7_0203100	N/A	protein kinase, putative
PF3D7_0203600	N/A	conserved Plasmodium protein, unknown function
PF3D7_0204100	N/A	Sel1 repeat-containing protein, putative
PF3D7_0204200	SEC66	translocation protein SEC66, putative
PF3D7_0204500	AspAT	aspartate transaminase
PF3D7_0206500	N/A	conserved Plasmodium protein, unknown function
PF3D7_0207100	N/A	conserved Plasmodium protein, unknown function
PF3D7_0208100	N/A	conserved Plasmodium protein, unknown function
PF3D7_0208400	N/A	conserved Plasmodium protein, unknown function
PF3D7_0210300	N/A	monocarboxylate transporter, putative
PF3D7_0210900	N/A	conserved Plasmodium protein, unknown function
PF3D7_0211200	RAB5a	ras-related protein Rab-5A
PF3D7_0211700	TKL1	tyrosine kinase-like protein, putative
PF3D7_0212100	N/A	conserved Plasmodium protein, unknown function
PF3D7_0212900	ATEL1	arginyl-tRNA--protein transferase
PF3D7_0213700	N/A	conserved protein, unknown function
PF3D7_0214100	SEC31	protein transport protein SEC31
PF3D7_0214300	N/A	conserved Plasmodium protein, unknown function
PF3D7_0215700	RPB2	DNA-directed RNA polymerase II subunit RPB2, putative
PF3D7_0216400	VPS45	vacuolar protein sorting-associated protein 45
PF3D7_0216600	N/A	sugar transporter, putative
PF3D7_0216700	ATG11	autophagy-related protein 11, putative
PF3D7_0217600	N/A	conserved Plasmodium protein, unknown function
PF3D7_0218200	N/A	SUZ domain-containing protein, putative
PF3D7_0218600	N/A	patatin-like phospholipase, putative
PF3D7_0302600	ABCB4	ABC transporter B family member 4, putative
PF3D7_0302900	N/A	exportin-1, putative
PF3D7_0303000	NSF	N-ethylmaleimide-sensitive fusion protein
PF3D7_0303100	N/A	CLP1 P-loop domain-containing protein, putative
PF3D7_0303500	N/A	spindle pole body protein, putative
PF3D7_0304800	N/A	conserved Plasmodium membrane protein, unknown function
PF3D7_0305100	N/A	conserved Plasmodium protein, unknown function
PF3D7_0305200	N/A	GRIP domain-containing protein, putative
PF3D7_0305300	N/A	transporter, putative
PF3D7_0305500	N/A	protein dopey homolog, putative
PF3D7_0307500	SKA2	spindle and kinetochore-associated protein 2, putative
PF3D7_0308100	N/A	zinc finger protein, putative
PF3D7_0308300	PIC4	PhIL1-interacting candidate PIC4
PF3D7_0308700	N/A	conserved protein, unknown function
PF3D7_0308900	SF3B1	splicing factor 3B subunit 1, putative
PF3D7_0309000	YVH1	dual specificity protein phosphatase
PF3D7_0309300	N/A	N2227-like protein, putative
PF3D7_0310200	N/A	phd finger protein, putative
PF3D7_0310300	N/A	phosphoglycerate mutase, putative
PF3D7_0310500	DHX57	ATP-dependent RNA helicase DHX57, putative
PF3D7_0311300	N/A	phosphatidylinositol 3- and 4-kinase, putative
PF3D7_0312100	N/A	E3 ubiquitin-protein ligase
PF3D7_0313000	N/A	conserved Plasmodium protein, unknown function
PF3D7_0314700	RNF1	RING finger protein RNF1
PF3D7_0315100	eIF4E	eukaryotic translation initiation factor 4E
PF3D7_0315600	N/A	zinc finger protein, putative
PF3D7_0315800	N/A	zinc finger protein, putative
PF3D7_0316200	N/A	conserved Plasmodium protein, unknown function
PF3D7_0316300	PPase	inorganic pyrophosphatase
PF3D7_0316800	N/A	40S ribosomal protein S15A, putative
PF3D7_0317200	CRK4	cdc2-related protein kinase 4
PF3D7_0317400	N/A	DNA replication complex GINS protein, putative
PF3D7_0317500	EG5	kinesin-5
PF3D7_0317700	N/A	CPSF (cleavage and polyadenylation specific factor), subunit A, putative
PF3D7_0318200	RPB1	DNA-directed RNA polymerase II subunit RPB1
PF3D7_0318500	N/A	conserved Plasmodium protein, unknown function
PF3D7_0319000	ATPase7	P4-type ATPase ATP7, putative
PF3D7_0319200	CCR4-4	CCR4 domain-containing protein 4, putative
PF3D7_0320100	SEC22	protein transport protein SEC22
PF3D7_0321000	N/A	conserved protein, unknown function
PF3D7_0321100	N/A	conserved Plasmodium protein, unknown function
PF3D7_0321500	N/A	peptidase, putative
PF3D7_0321600	DDX42	ATP-dependent RNA helicase DDX42, putative
PF3D7_0321700	N/A	conserved Plasmodium protein, unknown function
PF3D7_0321800	N/A	WD repeat-containing protein, putative
PF3D7_0321900	CARL	cyclic amine resistance locus protein
PF3D7_0322400	N/A	regulator of initiation factor 2 (eIF2)
PF3D7_0323100	N/A	conserved Plasmodium protein, unknown function
PF3D7_0323700	SART1	U4/U6.U5 tri-snRNP-associated protein 1, putative
PF3D7_0400400	VAR	erythrocyte membrane protein 1, PfEMP1
PF3D7_0401800	PfD80	Plasmodium exported protein (PHISTb), unknown function
PF3D7_0402100	N/A	Plasmodium exported protein (PHISTb), unknown function
PF3D7_0402400	GEXP18	Plasmodium exported protein, unknown function
PF3D7_0403200	N/A	pre-mRNA splicing factor, putative
PF3D7_0403600	N/A	conserved Plasmodium protein, unknown function
PF3D7_0405100	SEC24B	protein transport protein Sec24B, putative
PF3D7_0405400	PRPF8	pre-mRNA-processing-splicing factor 8, putative
PF3D7_0405700	N/A	lysine decarboxylase, putative
PF3D7_0406900	N/A	conserved Plasmodium protein, unknown function
PF3D7_0407300	N/A	transcription factor, putative
PF3D7_0407700	N/A	conserved Plasmodium protein, unknown function
PF3D7_0408300	ZRANB2	zinc finger Ran-binding domain-containing protein 2, putative
PF3D7_0409600	RPA1	replication protein A1, large subunit
PF3D7_0410000	EVP1	erythrocyte vesicle protein 1
PF3D7_0410300	PPM1	protein phosphatase PPM1, putative
PF3D7_0410800	N/A	conserved Plasmodium protein, unknown function
PF3D7_0411800	N/A	conserved Plasmodium protein, unknown function
PF3D7_0411900	N/A	DNA polymerase alpha catalytic subunit A
PF3D7_0413900	USP13	ubiquitin carboxyl-terminal hydrolase 13, putative
PF3D7_0414600	APH	acylated pleckstrin-homology domain-containing protein, putative
PF3D7_0414900	ARO	armadillo-domain containing rhoptry protein
PF3D7_0415200	N/A	conserved Plasmodium protein, unknown function
PF3D7_0415300	CRK3	cdc2-related protein kinase 3
PF3D7_0415800	N/A	PhIL1-interacting candidate PIC3
PF3D7_0416300	MCM9	DNA helicase MCM9, putative
PF3D7_0416900	N/A	conserved Plasmodium protein, unknown function
PF3D7_0417400	N/A	conserved Plasmodium protein, unknown function
PF3D7_0418100	SOC1	protein SOC1, putative
PF3D7_0418300	N/A	conserved Plasmodium protein, unknown function
PF3D7_0418600	N/A	regulator of chromosome condensation, putative
PF3D7_0418700	N/A	RNA-binding protein NOB1, putative
PF3D7_0419500	N/A	conserved Plasmodium membrane protein, unknown function
PF3D7_0419900	N/A	phosphatidylinositol 4-kinase, putative
PF3D7_0420000	N/A	zinc finger protein, putative
PF3D7_0420300	ApiAP2	AP2 domain transcription factor, putative
PF3D7_0422200	N/A	erythrocyte membrane-associated antigen
PF3D7_0422300	N/A	alpha tubulin 2
PF3D7_0422500	BRR2	pre-mRNA-splicing helicase BRR2, putative
PF3D7_0501300	SBP1	skeleton-binding protein 1
PF3D7_0501800	CAF1A	chromatin assembly factor 1 subunit A
PF3D7_0502000	VPS11	vacuolar protein sorting-associated protein 11, putative
PF3D7_0503200	CDC6	cell division control protein 6, putative
PF3D7_0503600	MyoB	myosin B
PF3D7_0504000	ATPase3	cation transporting P-ATPase
PF3D7_0504800	N/A	conserved Plasmodium protein, unknown function
PF3D7_0505000	N/A	MMS19-like protein, putative
PF3D7_0505100	TRS85	trafficking protein particle complex subunit 8, putative
PF3D7_0505500	MSH6	DNA mismatch repair protein MSH6, putative
PF3D7_0505700	N/A	conserved Plasmodium membrane protein, unknown function
PF3D7_0506100	N/A	60S ribosomal subunit protein L24, putative
PF3D7_0506700	N/A	GTPase-activating protein, putative
PF3D7_0507700	NPL4	nuclear protein localization protein 4, putative
PF3D7_0508500	ND6	ND6 protein, putative
PF3D7_0508700	PRP5	pre-mRNA-processing ATP-dependent RNA helicase PRP5, putative
PF3D7_0509100	SMC4	structural maintenance of chromosomes protein 4, putative
PF3D7_0509400	RNAPI	RNA polymerase I
PF3D7_0509500	N/A	ERCC4 domain-containing protein, putative
PF3D7_0509800	PI4KB	phosphatidylinositol 4-kinase beta
PF3D7_0510100	N/A	KH domain-containing protein, putative
PF3D7_0510200	CYP87	peptidyl-prolyl cis-trans isomerase
PF3D7_0510500	TopoI	topoisomerase I
PF3D7_0511000	TCTP	translationally-controlled tumor protein homolog
PF3D7_0511500	N/A	RNA pseudouridylate synthase, putative
PF3D7_0512000	PFD6	prefoldin subunit 6
PF3D7_0512300	MAT1	CDK-activating kinase assembly factor MAT1
PF3D7_0512600	RAB1b	ras-related protein Rab-1B
PF3D7_0513200	N/A	CPSF domain-containing protein, putative
PF3D7_0514900	N/A	conserved Plasmodium protein, unknown function
PF3D7_0515000	CWC2	pre-mRNA-splicing factor CWC2, putative
PF3D7_0515300	PI3K	phosphatidylinositol 3-kinase
PF3D7_0516500	MFS1	major facilitator superfamily domain-containing protein, putative
PF3D7_0516700	N/A	ubiquitin carboxyl-terminal hydrolase 2, putative
PF3D7_0516800	ApiAP2	AP2 domain transcription factor AP2-O2, putative
PF3D7_0517400	FACT-L	FACT complex subunit SPT16, putative
PF3D7_0517700	EIF3B	eukaryotic translation initiation factor 3 subunit B, putative
PF3D7_0518600	WDR26	WD repeat-containing protein 26, putative
PF3D7_0519500	CCR4-1	CCR4 domain-containing protein 1, putative
PF3D7_0519600	N/A	zinc finger protein, putative
PF3D7_0520100	PPM9	protein phosphatase PPM9, putative
PF3D7_0521700	DDX1	ATP-dependent RNA helicase DDX1, putative
PF3D7_0522100	N/A	conserved Plasmodium protein, unknown function
PF3D7_0522400	N/A	conserved Plasmodium protein, unknown function
PF3D7_0522900	N/A	zinc finger protein, putative
PF3D7_0523800	N/A	divalent metal transporter, putative
PF3D7_0523900	N/A	MerC domain-containing protein, putative
PF3D7_0524000	KASbeta	karyopherin beta
PF3D7_0524800	UFD1	ubiquitin fusion degradation protein 1, putative
PF3D7_0525100	ACS10	acyl-CoA synthetase
PF3D7_0525500	N/A	WD repeat-containing protein, putative
PF3D7_0526500	N/A	conserved Plasmodium protein, unknown function
PF3D7_0527500	HIP	Hsc70-interacting protein
PF3D7_0528100	N/A	AP-1/2 complex subunit beta, putative
PF3D7_0528700	CYP23	peptidyl-prolyl cis-trans isomerase
PF3D7_0528800	N/A	nuclear GTP-binding protein, putative
PF3D7_0530900	FRM1	formin 1
PF3D7_0531100	N/A	conserved Plasmodium protein, unknown function
PF3D7_0601500	N/A	Plasmodium exported protein (PHISTb), unknown function
PF3D7_0601600	N/A	tetratricopeptide repeat protein, putative
PF3D7_0602000	N/A	zinc finger protein, putative
PF3D7_0602100	MTR4	ATP-dependent RNA helicase MTR4
PF3D7_0602900	N/A	conserved Plasmodium protein, unknown function
PF3D7_0603000	N/A	SDE2 domain-containing protein, putative
PF3D7_0603600	N/A	AT-rich interactive domain-containing protein, putative
PF3D7_0603900	N/A	conserved Plasmodium protein, unknown function
PF3D7_0604000	N/A	conserved Plasmodium protein, unknown function
PF3D7_0604500	N/A	GYF domain-containing protein, putative
PF3D7_0605300	ARK1	serine/threonine protein kinase ARK1
PF3D7_0605800	RAD50	DNA repair protein RAD50, putative
PF3D7_0605900	N/A	elongation of fatty acids protein, putative
PF3D7_0606100	N/A	RNA-binding protein, putative
PF3D7_0606500	PTB	polypyrimidine tract-binding protein, putative
PF3D7_0606600	N/A	conserved Plasmodium protein, unknown function
PF3D7_0606700	N/A	coatomer alpha subunit, putative
PF3D7_0607200	N/A	RING zinc finger protein, putative
PF3D7_0607600	SAS6	spindle assembly abnormal protein 6, putative
PF3D7_0608900	N/A	conserved Plasmodium protein, unknown function
PF3D7_0609000	NUP637	nucleoporin NUP637, putative
PF3D7_0609300	N/A	conserved Plasmodium protein, unknown function
PF3D7_0609700	KIC6	protein KIC6
PF3D7_0609900	N/A	conserved Plasmodium protein, unknown function
PF3D7_0610200	RBM25	RNA-binding protein 25, putative
PF3D7_0611400	SWIB	SWI/SNF-related matrix-associated actin-dependent regulator of chromatin
PF3D7_0611800	N/A	conserved Plasmodium protein, unknown function
PF3D7_0613600	N/A	conserved Plasmodium protein, unknown function
PF3D7_0613700	N/A	syntaxin-binding protein, putative
PF3D7_0613800	ApiAP2	AP2 domain transcription factor, putative
PF3D7_0614200	NAR1	cytosolic Fe-S cluster assembly factor NAR1, putative
PF3D7_0614900	N/A	conserved Plasmodium membrane protein, unknown function
PF3D7_0615400	N/A	ribonuclease, putative
PF3D7_0615900	N/A	protein phosphatase, putative
PF3D7_0616300	N/A	conserved Plasmodium protein, unknown function
PF3D7_0616600	N/A	conserved protein, unknown function
PF3D7_0617100	N/A	AP-2 complex subunit alpha, putative
PF3D7_0618500	MDH	malate dehydrogenase
PF3D7_0618900	GPI1	phosphatidylinositol N-acetylglucosaminyltransferase subunit GPI1
PF3D7_0619000	N/A	FPL domain-containing protein, putative
PF3D7_0619300	N/A	conserved Plasmodium protein, unknown function
PF3D7_0621100	N/A	conserved Plasmodium protein, unknown function
PF3D7_0621800	N/A	nascent polypeptide-associated complex subunit alpha, putative
PF3D7_0622800	N/A	leucine--tRNA ligase, putative
PF3D7_0622900	AP2Tel	AP2 domain transcription factor AP2Tel
PF3D7_0623100	NAB2	nuclear polyadenylated RNA-binding protein NAB2, putative
PF3D7_0623600	N/A	splicing factor-like protein 1, putative
PF3D7_0623800	TKL4	tyrosine kinase-like protein, putative
PF3D7_0624000	HK	hexokinase
PF3D7_0624600	ISWI	ISWI chromatin-remodeling complex ATPase
PF3D7_0625000	SMS1	sphingomyelin synthase 1, putative
PF3D7_0626400	N/A	CRAL/TRIO domain-containing protein, putative
PF3D7_0627100	N/A	ankyrin-repeat protein, putative
PF3D7_0627300	RNF5	E3 ubiquitin-protein ligase RNF5, putative
PF3D7_0627700	N/A	transportin
PF3D7_0627800	ACAS	acetyl-CoA synthetase
PF3D7_0628100	HECT1	HECT domain-containing protein 1, putative
PF3D7_0628200	PK4	eukaryotic translation initiation factor 2-alpha kinase
PF3D7_0628500	N/A	conserved Plasmodium protein, unknown function
PF3D7_0629700	SET1	SET domain protein, putative
PF3D7_0629800	N/A	cullin-2, putative
PF3D7_0630300	N/A	DNA polymerase epsilon catalytic subunit A, putative
PF3D7_0630600	N/A	deubiquitinating enzyme MINDY, putative
PF3D7_0631000	N/A	tetratricopeptide repeat protein, putative
PF3D7_0701600	MC-2TM	Pfmc-2TM Maurer's cleft two transmembrane protein
PF3D7_0703200	N/A	conserved Plasmodium protein, unknown function
PF3D7_0704000	N/A	conserved Plasmodium membrane protein, unknown function
PF3D7_0704100	BTP2	basal complex transmembrane protein 2
PF3D7_0704200	NSUN1	RNA cytosine C(5)-methyltransferase, putative
PF3D7_0704400	N/A	phosphoinositide-binding protein, putative
PF3D7_0704600	UT	HECT-type E3 ubiquitin ligase UT
PF3D7_0704700	PPAT	phosphopantetheine adenylyltransferase, putative
PF3D7_0705000	N/A	mRNA cap guanine-N7 methyltransferase, putative
PF3D7_0705500	N/A	inositol-phosphate phosphatase, putative
PF3D7_0706000	N/A	importin-7, putative
PF3D7_0706400	RPL37	60S ribosomal protein L37
PF3D7_0706500	N/A	conserved Plasmodium protein, unknown function
PF3D7_0707200	N/A	conserved Plasmodium protein, unknown function
PF3D7_0707500	N/A	conserved Plasmodium protein, unknown function
PF3D7_0707700	N/A	E3 ubiquitin-protein ligase, putative
PF3D7_0708000	N/A	cytoskeleton associated protein, putative
PF3D7_0709400	N/A	Cg7 protein
PF3D7_0709600	POP1	ribonucleases P/MRP protein subunit POP1, putative
PF3D7_0710200	N/A	conserved Plasmodium protein, unknown function
PF3D7_0710800	USE1	protein transport protein USE1, putative
PF3D7_0711500	N/A	regulator of chromosome condensation, putative
PF3D7_0714600	N/A	conserved protein, unknown function
PF3D7_0715800	DMT1	drug/metabolite transporter DMT1, putative
PF3D7_0715900	CDF	cation diffusion facilitator family protein, putative
PF3D7_0717100	N/A	CRAL/TRIO domain-containing protein, putative
PF3D7_0717400	N/A	queuine tRNA-ribosyltransferase, putative
PF3D7_0717600	IMC32	inner membrane complex protein, putative
PF3D7_0717700	N/A	serine--tRNA ligase, putative
PF3D7_0718100	EST	exported serine/threonine protein kinase
PF3D7_0719900	N/A	conserved Plasmodium membrane protein, unknown function
PF3D7_0720700	PX1	phosphoinositide-binding protein PX1
PF3D7_0721000	N/A	conserved Plasmodium membrane protein, unknown function
PF3D7_0721100	N/A	conserved protein, unknown function
PF3D7_0721200	N/A	conserved Plasmodium protein, unknown function
PF3D7_0722200	RALP1	rhoptry-associated leucine zipper-like protein 1
PF3D7_0723400	N/A	conserved Plasmodium protein, unknown function
PF3D7_0723800	N/A	conserved Plasmodium protein, unknown function
PF3D7_0724000	N/A	Rab GTPase activator and protein kinase, putative
PF3D7_0724600	N/A	protein kinase, putative
PF3D7_0724700	BDP6	bromodomain protein 6, putative
PF3D7_0725000	N/A	exonuclease I, putative
PF3D7_0725300	N/A	conserved protein, unknown function
PF3D7_0726100	N/A	Plasmodium exported protein, unknown function
PF3D7_0726300	PMS1	DNA mismatch repair protein PMS1, putative
PF3D7_0726400	N/A	conserved Plasmodium membrane protein, unknown function
PF3D7_0726500	N/A	ubiquitin carboxyl-terminal hydrolase, putative
PF3D7_0726600	N/A	conserved Plasmodium protein, unknown function
PF3D7_0727800	N/A	cation transporting ATPase, putative
PF3D7_0727900	N/A	conserved Plasmodium protein, unknown function
PF3D7_0728000	eIF2alpha	eukaryotic translation initiation factor 2 subunit alpha
PF3D7_0728100	N/A	anaphase-promoting complex subunit 1, putative
PF3D7_0728600	N/A	RING zinc finger protein, putative
PF3D7_0728800	N/A	conserved Plasmodium protein, unknown function
PF3D7_0729100	N/A	allantoicase, putative
PF3D7_0729300	NMD3	60S ribosomal export protein NMD3, putative
PF3D7_0729400	N/A	ribosome biogenesis protein BRX1, putative
PF3D7_0729500	MT-A70	N6-adenosine-methyltransferase MT-A70
PF3D7_0730500	N/A	conserved Plasmodium protein, unknown function
PF3D7_0730800	N/A	Plasmodium exported protein, unknown function
PF3D7_0731300	PfG174	Plasmodium exported protein (PHISTb), unknown function
PF3D7_0731800	GEXP08	alpha/beta hydrolase, putative
PF3D7_0801700	SENP2	sentrin-specific protease 2, putative
PF3D7_0801800	N/A	mannose-6-phosphate isomerase, putative
PF3D7_0802000	GDH3	glutamate dehydrogenase, putative
PF3D7_0802100	AP2-LT	AP2 domain transcription factor AP2-LT
PF3D7_0802400	N/A	cyclin-like protein, putative
PF3D7_0802600	ACbeta	adenylyl cyclase beta
PF3D7_0803400	RAD54	DNA repair and recombination protein RAD54, putative
PF3D7_0804300	N/A	zinc finger protein, putative
PF3D7_0805700	FIKK8	serine/threonine protein kinase, FIKK family
PF3D7_0806000	N/A	AAA family ATPase, putative
PF3D7_0806300	FLP	ferlin-like protein, putative
PF3D7_0807100	PSH3	DNA helicase PSH3
PF3D7_0807200	N/A	conserved Plasmodium membrane protein, unknown function
PF3D7_0807600	N/A	conserved Plasmodium protein, unknown function
PF3D7_0808100	N/A	AP-3 complex subunit delta, putative
PF3D7_0809200	pfa55-14	asparagine-rich antigen Pfa55-14
PF3D7_0809600	N/A	peptidase family C50, putative
PF3D7_0809900	JmjC1	JmjC domain-containing protein 1, putative
PF3D7_0811400	N/A	conserved protein, unknown function
PF3D7_0811500	CARM1	histone-arginine methyltransferase CARM1, putative
PF3D7_0812500	N/A	RNA-binding protein, putative
PF3D7_0812700	SNRPC	U1 small nuclear ribonucleoprotein C, putative
PF3D7_0813300	N/A	NPL domain-containing protein, putative
PF3D7_0813600	N/A	translation initiation factor SUI1, putative
PF3D7_0814500	N/A	conserved protein, unknown function
PF3D7_0815800	VPS9	vacuolar protein sorting-associated protein 9, putative
PF3D7_0816000	RRB1	ribosome assembly protein RRB1, putative
PF3D7_0817200	N/A	conserved protein, unknown function
PF3D7_0817500	HINT1	histidine triad nucleotide-binding protein 1
PF3D7_0818100	N/A	zinc finger protein, putative
PF3D7_0818700	N/A	DNA helicase, putative
PF3D7_0819000	N/A	ribonuclease, putative
PF3D7_0820000	SRCAP	Snf2-related CBP activator, putative
PF3D7_0821300	DHX36	ATP-dependent RNA helicase DHX36, putative
PF3D7_0823000	VPS15	serine/threonine protein kinase VPS15, putative
PF3D7_0823100	N/A	RWD domain-containing protein, putative
PF3D7_0823300	GCN5	histone acetyltransferase GCN5
PF3D7_0824200	N/A	conserved Plasmodium protein, unknown function
PF3D7_0824800	N/A	conserved Plasmodium membrane protein, unknown function
PF3D7_0824900	N/A	conserved Plasmodium protein, unknown function
PF3D7_0825000	N/A	conserved Plasmodium protein, unknown function
PF3D7_0825300	N/A	SAYSvFN domain-containing protein, putative
PF3D7_0826100	HEUL	HECT-like E3 ubiquitin ligase, putative
PF3D7_0826500	UBE4B	ubiquitin conjugation factor E4 B, putative
PF3D7_0826600	VAMP7	SNARE protein, putative
PF3D7_0827000	DBP10	ATP-dependent RNA helicase DBP10, putative
PF3D7_0827300	N/A	conserved Plasmodium protein, unknown function
PF3D7_0827800	SET3	SET domain protein, putative
PF3D7_0828000	ROM3	rhomboid protease ROM3
PF3D7_0829000	N/A	conserved Plasmodium membrane protein, unknown function
PF3D7_0829400	N/A	prolyl 4-hydroxylase subunit alpha, putative
PF3D7_0831000	GEXP09	Plasmodium exported protein (PHISTb), unknown function
PF3D7_0903200	RAB7	ras-related protein RAB7
PF3D7_0903300	N/A	conserved protein, unknown function
PF3D7_0903700	N/A	alpha tubulin 1
PF3D7_0904100	N/A	AP-4 complex subunit epsilon, putative
PF3D7_0904600	N/A	ubiquitin specific protease, putative
PF3D7_0905000	ATPTG4	ATP synthase-associated protein, putative
PF3D7_0905300	N/A	dynein heavy chain, putative
PF3D7_0905900	SEC27	coatomer subunit beta, putative
PF3D7_0907200	N/A	GTPase-activating protein, putative
PF3D7_0908600	N/A	ribosomal RNA methyltransferase, putative
PF3D7_0909700	N/A	FHA domain protein, putative
PF3D7_0909900	N/A	helicase SKI2W, putative
PF3D7_0910100	N/A	exportin-7, putative
PF3D7_0910200	N/A	conserved Plasmodium protein, unknown function
PF3D7_0911100	N/A	START domain-containing protein, putative
PF3D7_0911400	N/A	conserved Plasmodium protein, unknown function
PF3D7_0911900	ICP	falstatin
PF3D7_0912000	N/A	conserved Plasmodium protein, unknown function
PF3D7_0912800	GCD10	tRNA (adenine(58)-N(1))-methyltransferase non-catalytic subunit TRM6, putative
PF3D7_0913600	N/A	conserved Plasmodium protein, unknown function
PF3D7_0914000	N/A	pseudouridylate synthase, putative
PF3D7_0914100	N/A	conserved Plasmodium protein, unknown function
PF3D7_0914300	N/A	met-10+ like protein, putative
PF3D7_0914500	N/A	conserved Plasmodium protein, unknown function
PF3D7_0916000	MFS2	major facilitator superfamily domain-containing protein, putative
PF3D7_0917000	MOP	merozoite organizing protein
PF3D7_0918600	RECQ1	ATP-dependent DNA helicase Q1
PF3D7_0918900	gammaGCS	gamma-glutamylcysteine synthetase
PF3D7_0920000	ELO3	elongation of fatty acids protein, putative
PF3D7_0920400	N/A	conserved Plasmodium protein, unknown function
PF3D7_0920700	N/A	CRAL/TRIO domain-containing protein, putative
PF3D7_0921600	N/A	tetratricopeptide repeat protein, putative
PF3D7_0921900	N/A	conserved Plasmodium protein, unknown function
PF3D7_0922700	PRP18	pre-mRNA-splicing factor 18, putative
PF3D7_0922800	N/A	conserved Plasmodium protein, unknown function
PF3D7_0922900	FabG	3-oxoacyl-[acyl-carrier-protein] reductase
PF3D7_0923200	NOS	nitric oxide synthase, putative
PF3D7_0924100	N/A	conserved Plasmodium protein, unknown function
PF3D7_0924500	N/A	conserved Plasmodium membrane protein, unknown function
PF3D7_0925400	N/A	protein phosphatase-beta
PF3D7_0926100	N/A	protein kinase, putative
PF3D7_0926400	N/A	monocarboxylate transporter, putative
PF3D7_0927200	N/A	zinc finger protein, putative
PF3D7_0928300	N/A	conserved Plasmodium protein, unknown function
PF3D7_0930400	N/A	zinc finger protein, putative
PF3D7_0930500	DGK1	diacylglycerol kinase, putative
PF3D7_0930600	CYP72	peptidyl-prolyl cis-trans isomerase
PF3D7_0930800	N/A	conserved Plasmodium membrane protein, unknown function
PF3D7_0932100	N/A	protein MAM3, putative
PF3D7_0932300	M18AAP	M18 aspartyl aminopeptidase
PF3D7_0932800	CSE1	importin alpha re-exporter, putative
PF3D7_0933000	N/A	CSTF domain-containing protein, putative
PF3D7_0933500	N/A	gamma-tubulin complex component, putative
PF3D7_0934100	XPD	TFIIH basal transcription factor complex helicase XPD subunit
PF3D7_0935500	GEXP22	Plasmodium exported protein, unknown function
PF3D7_1001800	N/A	Plasmodium exported protein (PHISTc), unknown function
PF3D7_1002000	N/A	Plasmodium exported protein (hyp2), unknown function
PF3D7_1002700	N/A	conserved Plasmodium protein, unknown function
PF3D7_1003000	N/A	guanylate cyclase organizer UGO, putative
PF3D7_1003400	N/A	conserved Plasmodium protein, unknown function
PF3D7_1003700	N/A	MKT1 domain-containing protein, putative
PF3D7_1003800	EFTUD2	U5 small nuclear ribonucleoprotein component, putative
PF3D7_1004000	N/A	60S ribosomal protein L13, putative
PF3D7_1004200	N/A	WD repeat-containing protein, putative
PF3D7_1004300	N/A	E3 ubiquitin-protein ligase, putative
PF3D7_1005600	N/A	DnaJ protein, putative
PF3D7_1008000	HDA2	histone deacetylase 2
PF3D7_1008100	PHD1	PHD finger protein PHD1
PF3D7_1008500	N/A	protein GPR89, putative
PF3D7_1009400	ZNF2	zinc finger protein, putative
PF3D7_1010200	N/A	DNA2/NAM7 helicase, putative
PF3D7_1011400	N/A	proteasome subunit beta type-5
PF3D7_1012500	N/A	phosphoglucomutase, putative
PF3D7_1012700	NIF4	NLI interacting factor-like phosphatase, putative
PF3D7_1013200	N/A	conserved Plasmodium protein, unknown function
PF3D7_1013500	PI-PLC	phosphoinositide-specific phospholipase C
PF3D7_1013600	N/A	conserved Plasmodium protein, unknown function
PF3D7_1013900	N/A	translation initiation factor eIF-2B subunit delta, putative
PF3D7_1014300	N/A	SPRY domain-containing protein, putative
PF3D7_1014600	ADA2	transcriptional coactivator ADA2
PF3D7_1014900	KIC8	protein KIC8
PF3D7_1015100	N/A	CWC16 domain-containing protein, putative
PF3D7_1015300	METAP1b	methionine aminopeptidase 1b, putative
PF3D7_1016500	N/A	Plasmodium exported protein (PHISTc), unknown function
PF3D7_1017000	N/A	DNA polymerase delta catalytic subunit
PF3D7_1017500	ELC	myosin essential light chain ELC
PF3D7_1018200	PPP8	serine/threonine protein phosphatase 8, putative
PF3D7_1018600	N/A	tRNA wybutosine-synthesizing protein, putative
PF3D7_1019000	N/A	eukaryotic translation initiation factor subunit eIF2A, putative
PF3D7_1019100	N/A	conserved Plasmodium protein, unknown function
PF3D7_1019500	N/A	TMEM94 domain-containing protein, putative
PF3D7_1019600	N/A	conserved Plasmodium protein, unknown function
PF3D7_1020700	N/A	N-acetyltransferase, GNAT family, putative
PF3D7_1021100	N/A	conserved Plasmodium protein, unknown function
PF3D7_1021200	N/A	conserved Plasmodium protein, unknown function
PF3D7_1021400	N/A	endomembrane protein 70, putative
PF3D7_1021700	N/A	VPS13 domain-containing protein, putative
PF3D7_1021800	SEA1	schizont egress antigen-1
PF3D7_1022000	N/A	RNA-binding protein UIS12, putative
PF3D7_1023000	N/A	conserved Plasmodium protein, unknown function
PF3D7_1023700	N/A	conserved Plasmodium protein, unknown function
PF3D7_1023900	CHD1	chromodomain-helicase-DNA-binding protein 1 homolog, putative
PF3D7_1025000	EPS15	Eps15-like protein
PF3D7_1025500	N/A	conserved Plasmodium protein, unknown function
PF3D7_1026600	N/A	conserved Plasmodium protein, unknown function
PF3D7_1026800	RPS2	40S ribosomal protein S2
PF3D7_1028600	N/A	conserved Plasmodium protein, unknown function
PF3D7_1028900	IMC1m	inner membrane complex protein 1m, putative
PF3D7_1029100	N/A	conserved Plasmodium protein, unknown function
PF3D7_1029400	CDC50C	LEM3/CDC50 family protein, putative
PF3D7_1029900	N/A	ORC3 domain-containing protein, putative
PF3D7_1030100	PRP22	pre-mRNA-splicing factor ATP-dependent RNA helicase PRP22, putative
PF3D7_1030200	CLAMP	claudin-like apicomplexan microneme protein, putative
PF3D7_1030300	N/A	conserved Plasmodium protein, unknown function
PF3D7_1031300	N/A	SAE2 domain-containing protein, putative
PF3D7_1031400	OTU	OTU-like cysteine protease
PF3D7_1032100	DCP1	mRNA-decapping enzyme subunit 1, putative
PF3D7_1033100	AdoMetDC/ODC	S-adenosylmethionine decarboxylase/ornithine decarboxylase
PF3D7_1033300	N/A	conserved protein, unknown function
PF3D7_1033500	WDR70	WD repeat-containing protein 70, putative
PF3D7_1033600	CEF1	pre-mRNA-splicing factor CEF1, putative
PF3D7_1034500	N/A	armadillo repeat protein, putative
PF3D7_1035200	N/A	S-antigen
PF3D7_1035300	GLURP	glutamate-rich protein GLURP
PF3D7_1035900	MAAP	merozoites-associated armadillo repeats protein
PF3D7_1037500	DYN2	dynamin-like protein
PF3D7_1039000	FIKK10.2	serine/threonine protein kinase, FIKK family
PF3D7_1039700	MC-2TM	Pfmc-2TM Maurer's cleft two transmembrane protein
PF3D7_1103100	RPP1	60S acidic ribosomal protein P1, putative
PF3D7_1103800	NOT1-G	CCR4-NOT transcription complex subunit NOT1-G, putative
PF3D7_1104000	N/A	phenylalanine--tRNA ligase beta subunit
PF3D7_1104200	SNF2L	chromatin remodeling protein
PF3D7_1104300	N/A	conserved Plasmodium protein, unknown function
PF3D7_1104900	N/A	calcium/calmodulin-dependent protein kinase, putative
PF3D7_1106700	DNA2	DNA replication ATP-dependent helicase/nuclease DNA2, putative
PF3D7_1106800	pTKL	pseudo-tyrosine kinase-like protein
PF3D7_1107200	N/A	conserved protein, unknown function
PF3D7_1107300	PAIP1	polyadenylate-binding protein-interacting protein 1, putative
PF3D7_1107800	ApiAP2	AP2 domain transcription factor, putative
PF3D7_1108100	N/A	conserved Plasmodium protein, unknown function
PF3D7_1108600	ERC	endoplasmic reticulum-resident calcium binding protein
PF3D7_1110200	PRPF6	pre-mRNA-processing factor 6, putative
PF3D7_1111600	N/A	endonuclease/exonuclease/phosphatase family protein, putative
PF3D7_1112100	N/A	conserved Plasmodium protein, unknown function
PF3D7_1113000	N/A	conserved Plasmodium protein, unknown function
PF3D7_1114500	N/A	conserved Plasmodium protein, unknown function
PF3D7_1114700	CLK3	cyclin-dependent-like kinase CLK3
PF3D7_1114900	N/A	filamin domain-containing protein, putative
PF3D7_1116700	DPAP1	dipeptidyl aminopeptidase 1
PF3D7_1117900	N/A	conserved Plasmodium protein, unknown function
PF3D7_1118300	N/A	insulinase, putative
PF3D7_1118500	NOP56	nucleolar protein 56, putative
PF3D7_1119900	SEC16	protein transport protein SEC16, putative
PF3D7_1120500	N/A	tRNA nucleotidyltransferase, putative
PF3D7_1121100	N/A	conserved protein, unknown function
PF3D7_1121300	TKL2	tyrosine kinase-like protein
PF3D7_1122400	N/A	conserved Plasmodium protein, unknown function
PF3D7_1122500	KIC10	protein KIC10
PF3D7_1122800	CDPK6	calcium-dependent protein kinase 6
PF3D7_1122900	N/A	dynein heavy chain, putative
PF3D7_1123000	N/A	conserved Plasmodium protein, unknown function
PF3D7_1123100	CDPK7	calcium-dependent protein kinase 7
PF3D7_1123200	LRR11	leucine-rich repeat protein
PF3D7_1124800	RRS1	ribosome biogenesis regulatory protein, putative
PF3D7_1125800	N/A	kelch domain-containing protein, putative
PF3D7_1126500	N/A	WD repeat-containing protein, putative
PF3D7_1126700	ATG23	conserved Plasmodium protein, unknown function
PF3D7_1127800	N/A	TFIIS central domain-containing protein, putative
PF3D7_1128000	N/A	conserved Plasmodium protein, unknown function
PF3D7_1128100	N/A	prefoldin subunit 5, putative
PF3D7_1129200	RPN7	26S proteasome regulatory subunit RPN7, putative
PF3D7_1129300	N/A	conserved Plasmodium protein, unknown function
PF3D7_1129400	NSUN3	RNA cytosine C(5)-methyltransferase, putative
PF3D7_1130000	PAGM	phosphoacetylglucosamine mutase, putative
PF3D7_1131500	N/A	conserved Plasmodium protein, unknown function
PF3D7_1132400	N/A	conserved Plasmodium membrane protein, unknown function
PF3D7_1133200	N/A	conserved Plasmodium protein, unknown function
PF3D7_1133400	AMA1	apical membrane antigen 1
PF3D7_1133800	N/A	RNA (uracil-5-)methyltransferase, putative
PF3D7_1135100	PPM8	protein phosphatase PPM8, putative
PF3D7_1135300	N/A	conserved Plasmodium membrane protein, unknown function
PF3D7_1136000	N/A	conserved Plasmodium protein, unknown function
PF3D7_1136400	SRP72	signal recognition particle subunit SRP72, putative
PF3D7_1136600	N/A	conserved Plasmodium protein, unknown function
PF3D7_1136900	SUB2	subtilisin-like protease 2
PF3D7_1138000	N/A	conserved Plasmodium protein, unknown function
PF3D7_1138400	GCalpha	guanylyl cyclase alpha
PF3D7_1138500	PPM2	protein phosphatase PPM2
PF3D7_1139800	N/A	conserved Plasmodium protein, unknown function
PF3D7_1140600	N/A	conserved Plasmodium protein, unknown function
PF3D7_1140700	N/A	chromo domain-containing protein, putative
PF3D7_1141800	N/A	EELM2 domain-containing protein, putative
PF3D7_1142300	N/A	conserved Plasmodium membrane protein, unknown function
PF3D7_1142500	RPL28	60S ribosomal protein L28
PF3D7_1143100	AP2-O	AP2 domain transcription factor AP2-O
PF3D7_1144000	RPS21	40S ribosomal protein S21
PF3D7_1144600	TFG2	transcription initiation factor IIF subunit beta, putative
PF3D7_1145200	N/A	serine/threonine protein kinase, putative
PF3D7_1145300	CRIPT	cysteine-rich PDZ-binding protein, putative
PF3D7_1146000	RSA4	ribosome assembly protein 4, putative
PF3D7_1147300	N/A	conserved Plasmodium protein, unknown function
PF3D7_1147500	FTB	protein farnesyltransferase subunit beta
PF3D7_1148800	N/A	Plasmodium exported protein (hyp11), unknown function
PF3D7_1149100	N/A	Plasmodium exported protein, unknown function
PF3D7_1202600	NEMF	nuclear export mediator factor NEMF, putative
PF3D7_1203300	N/A	TBCC domain-containing protein, putative
PF3D7_1203400	MFS4	major facilitator superfamily domain-containing protein, putative
PF3D7_1205100	SEPSECS	O-phosphoseryl-tRNA(Sec) selenium transferase, putative
PF3D7_1205200	HADO	HAD domain ookinete protein, putative
PF3D7_1205500	N/A	zinc finger protein, putative
PF3D7_1205900	N/A	conserved protein, unknown function
PF3D7_1206200	EIF3C	eukaryotic translation initiation factor 3 subunit C, putative
PF3D7_1206300	N/A	conserved Plasmodium protein, unknown function
PF3D7_1206700	EIF5	eukaryotic translation initiation factor 5, putative
PF3D7_1206800	N/A	conserved Plasmodium protein, unknown function
PF3D7_1207100	N/A	pre-rRNA-processing protein ESF1, putative
PF3D7_1208100	N/A	conserved Plasmodium protein, unknown function
PF3D7_1208400	N/A	amino acid transporter, putative
PF3D7_1208800	N/A	zinc finger protein, putative
PF3D7_1209300	TRZ	telomere repeat-binding zinc finger protein
PF3D7_1209400	CIA1	cytosolic iron-sulfur protein assembly protein 1, putative
PF3D7_1209500	PDEalpha	cGMP-specific 3',5'-cyclic phosphodiesterase alpha
PF3D7_1211200	N/A	conserved Plasmodium protein, unknown function
PF3D7_1211300	MCM8	DNA helicase MCM8, putative
PF3D7_1212400	N/A	tetratricopeptide repeat protein, putative
PF3D7_1213800	PRS	proline--tRNA ligase
PF3D7_1213900	N/A	W2 domain-containing protein, putative
PF3D7_1216400	N/A	conserved Plasmodium membrane protein, unknown function
PF3D7_1216900	N/A	DNA-binding chaperone, putative
PF3D7_1217200	MRD1	multiple RNA-binding domain-containing protein 1, putative
PF3D7_1217900	N/A	PPPDE peptidase domain-containing protein, putative
PF3D7_1218300	AP2-MU	AP-2 complex subunit mu
PF3D7_1219000	FRM2	formin 2
PF3D7_1219100	CHC	clathrin heavy chain, putative
PF3D7_1220300	N/A	cell cycle associated protein, putative
PF3D7_1220400	DRN1	debranching enzyme-associated ribonuclease, putative
PF3D7_1220500	TSR3	ribosome biogenesis protein TSR3, putative
PF3D7_1221000	SET10	histone-lysine N-methyltransferase, H3 lysine-4 specific
PF3D7_1221300	N/A	conserved Plasmodium protein, unknown function
PF3D7_1222400	ApiAP2	AP2 domain transcription factor
PF3D7_1223100	PKAr	cAMP-dependent protein kinase regulatory subunit
PF3D7_1223200	N/A	nucleus export protein BRR6, putative
PF3D7_1223500	N/A	conserved Plasmodium protein, unknown function
PF3D7_1224200	N/A	BRO1 domain-containing protein, putative
PF3D7_1224400	N/A	WD repeat-containing protein, putative
PF3D7_1224500	ASF1	histone chaperone ASF1
PF3D7_1224700	N/A	conserved Plasmodium protein, unknown function
PF3D7_1225700	N/A	VAC14 domain-containing protein, putative
PF3D7_1226600	PCNA2	proliferating cell nuclear antigen 2
PF3D7_1226700	RRP9	U3 small nucleolar RNA-interacting protein 2, putative
PF3D7_1227200	K1	potassium channel K1
PF3D7_1227300	N/A	conserved Plasmodium protein, unknown function
PF3D7_1227400	N/A	conserved Plasmodium protein, unknown function
PF3D7_1227500	SOC2	protein SOC2, putative
PF3D7_1228100	LRR13	leucine-rich repeat protein
PF3D7_1228300	NEK1	NIMA related kinase 1
PF3D7_1228400	N/A	conserved Plasmodium protein, unknown function
PF3D7_1228800	N/A	WD repeat-containing protein, putative
PF3D7_1229100	MRP2	multidrug resistance-associated protein 2
PF3D7_1230000	N/A	TBC domain-containing protein, putative
PF3D7_1230700	SEC13	protein transport protein SEC13
PF3D7_1231100	RAB2	ras-related protein Rab-2
PF3D7_1232500	N/A	CG2-related protein, putative
PF3D7_1233200	N/A	conserved Plasmodium protein, unknown function
PF3D7_1233600	AARP1	asparagine and aspartate rich protein 1
PF3D7_1233900	SENP1	sentrin-specific protease 1
PF3D7_1234100	BDP5	bromodomain protein 5
PF3D7_1234500	N/A	conserved Plasmodium protein, unknown function
PF3D7_1234800	SF3B3	splicing factor 3B subunit 3, putative
PF3D7_1235900	XAB2	pre-mRNA-splicing factor SYF1, putative
PF3D7_1236100	CARP	clustered-asparagine-rich protein
PF3D7_1236800	ICMT	protein-S-isoprenylcysteine O-methyltransferase
PF3D7_1237000	UBA2	SUMO-activating enzyme subunit 2
PF3D7_1237200	N/A	conserved Plasmodium protein, unknown function
PF3D7_1237500	N/A	conserved Plasmodium protein, unknown function
PF3D7_1238300	CWC22	pre-mRNA-splicing factor CWC22, putative
PF3D7_1238500	N/A	conserved Plasmodium protein, unknown function
PF3D7_1238900	PK2	protein kinase 2
PF3D7_1239000	N/A	HD superfamily phosphohydrolase protein, putative
PF3D7_1239200	ApiAP2	AP2 domain transcription factor, putative
PF3D7_1239800	N/A	conserved Plasmodium protein, unknown function
PF3D7_1240000	N/A	3-hydroxyisobutyryl-CoA hydrolase, putative
PF3D7_1241200	N/A	conserved Plasmodium protein, unknown function
PF3D7_1241900	N/A	tetratricopeptide repeat protein, putative
PF3D7_1242300	N/A	conserved Plasmodium membrane protein, unknown function
PF3D7_1242600	N/A	protein farnesyltransferase subunit alpha
PF3D7_1243400	N/A	conserved Plasmodium protein, unknown function
PF3D7_1244200	TFB2	RNA polymerase II transcription factor B subunit 2, putative
PF3D7_1245100	KLP8	kinesin-13, putative
PF3D7_1247400	FKBP35	peptidyl-prolyl cis-trans isomerase FKBP35
PF3D7_1247500	N/A	serine/threonine protein kinase, putative
PF3D7_1248700	N/A	conserved protein, unknown function
PF3D7_1249300	PPM4	protein phosphatase PPM4, putative
PF3D7_1249600	LRR12	leucine-rich repeat protein
PF3D7_1250200	N/A	CSC1-like protein, putative
PF3D7_1250800	N/A	DNA repair protein rhp16, putative
PF3D7_1251100	N/A	conserved Plasmodium protein, unknown function
PF3D7_1251200	N/A	coronin
PF3D7_1251500	DRS1	ATP-dependent RNA helicase DRS1, putative
PF3D7_1301600	EBA140	erythrocyte binding antigen-140
PF3D7_1301700	CBP2	CX3CL1-binding protein 2
PF3D7_1302000	PTP6	EMP1-trafficking protein
PF3D7_1302500	N/A	AAA domain-containing protein, putative
PF3D7_1303400	LisH	LisH domain-containing protein, putative
PF3D7_1303500	NHE	sodium/hydrogen exchanger
PF3D7_1303700	N/A	tetratricopeptide repeat protein, putative
PF3D7_1303800	N/A	conserved Plasmodium protein, unknown function
PF3D7_1304200	MIT2	CorA-like Mg2+ transporter protein, putative
PF3D7_1304400	N/A	PUB domain-containing protein, putative
PF3D7_1305300	GCN1	translational activator GCN1, putative
PF3D7_1306300	N/A	SAM dependent methyltransferase, putative
PF3D7_1307100	UTP6	U3 small nucleolar RNA-associated protein 6, putative
PF3D7_1307500	N/A	conserved Plasmodium protein, unknown function
PF3D7_1307800	CEP170	centrosomal protein CEP170, putative
PF3D7_1307900	N/A	tripartite motif protein, putative
PF3D7_1308000	N/A	conserved Plasmodium membrane protein, unknown function
PF3D7_1308200	cpsSII	carbamoyl phosphate synthetase
PF3D7_1308400	N/A	conserved Plasmodium protein, unknown function
PF3D7_1308900	DCP2	mRNA-decapping enzyme 2, putative
PF3D7_1309700	VPS18	vacuolar protein sorting-associated protein 18, putative
PF3D7_1310400	N/A	conserved Plasmodium protein, unknown function
PF3D7_1311500	RPT1	26S protease regulatory subunit 7, putative
PF3D7_1311900	vapA	V-type proton ATPase catalytic subunit A
PF3D7_1312900	EIF4G	eukaryotic translation initation factor 4 gamma
PF3D7_1313100	N/A	conserved Plasmodium protein, unknown function
PF3D7_1313600	N/A	Clu domain-containing protein, putative
PF3D7_1313700	N/A	Maf-like protein, putative
PF3D7_1313800	N/A	conserved Plasmodium membrane protein, unknown function
PF3D7_1314100	N/A	conserved Plasmodium protein, unknown function
PF3D7_1314200	TERT	telomerase reverse transcriptase
PF3D7_1315900	N/A	exportin-T, putative
PF3D7_1316100	IPK2	inositol polyphosphate kinase, putative
PF3D7_1316900	N/A	conserved protein, unknown function
PF3D7_1317000	USP39	U4/U6.U5 tri-snRNP-associated protein 2, putative
PF3D7_1317100	MCM4	DNA replication licensing factor MCM4
PF3D7_1318300	N/A	conserved Plasmodium protein, unknown function
PF3D7_1318700	AAP4	protein AAP4
PF3D7_1319600	N/A	ACDC domain-containing protein, putative
PF3D7_1320700	N/A	conserved protein, unknown function
PF3D7_1321200	N/A	zinc finger protein, putative
PF3D7_1321300	N/A	conserved Plasmodium membrane protein, unknown function
PF3D7_1322100	SET2	histone-lysine N-methyltransferase SET2
PF3D7_1322200	N/A	TOG domain-containing protein, putative
PF3D7_1322300	N/A	BRCT domain-containing protein, putative
PF3D7_1324000	N/A	conserved Plasmodium protein, unknown function
PF3D7_1324300	N/A	conserved Plasmodium membrane protein, unknown function
PF3D7_1324500	N/A	DEAD box helicase, putative
PF3D7_1324600	N/A	conserved Plasmodium protein, unknown function
PF3D7_1325400	N/A	CRWN-like protein, putative
PF3D7_1325900	N/A	conserved Plasmodium protein, unknown function
PF3D7_1326500	N/A	conserved Plasmodium protein, unknown function
PF3D7_1327300	N/A	conserved Plasmodium protein, unknown function
PF3D7_1327500	N/A	conserved protein, unknown function
PF3D7_1327600	NMNAT	nicotinamide/nicotinic acid mononucleotide adenylyltransferase
PF3D7_1328200	N/A	conserved Plasmodium protein, unknown function
PF3D7_1328500	N/A	alpha/beta-hydrolase, putative
PF3D7_1329100	MyoF	myosin F, putative
PF3D7_1329500	N/A	conserved protein, unknown function
PF3D7_1330000	N/A	PITH domain-containing protein, putative
PF3D7_1330400	N/A	ER lumen protein retaining receptor 1, putative
PF3D7_1330800	N/A	RNA-binding protein, putative
PF3D7_1331500	N/A	conserved Plasmodium protein, unknown function
PF3D7_1332400	N/A	nucleotidyltransferase, putative
PF3D7_1332900	cyto-IRS	isoleucine--tRNA ligase, putative
PF3D7_1333100	N/A	conserved Plasmodium protein, unknown function
PF3D7_1333200	UBA1	ubiquitin-activating enzyme
PF3D7_1333600	UTP4	U3 small nucleolar RNA-associated protein 4, putative
PF3D7_1334000	N/A	RING zinc finger protein, putative
PF3D7_1334100	N/A	conserved protein, unknown function
PF3D7_1334200	N/A	chaperone binding protein, putative
PF3D7_1334300	MSRP5	MSP7-like protein
PF3D7_1335700	COG3	conserved oligomeric Golgi complex subunit 3, putative
PF3D7_1336800	NUDC	nuclear movement protein, putative
PF3D7_1337500	N/A	conserved Plasmodium protein, unknown function
PF3D7_1338000	N/A	LMBR1 domain-containing protein, putative
PF3D7_1338700	N/A	conserved protein, unknown function
PF3D7_1339700	N/A	conserved Plasmodium protein, unknown function
PF3D7_1339900	ABCB5	ABC transporter B family member 5, putative
PF3D7_1340300	N/A	nucleolar complex protein 2, putative
PF3D7_1340600	DBR1	RNA lariat debranching enzyme, putative
PF3D7_1340700	RAB11b	ras-related protein Rab-11B
PF3D7_1340900	PiT	sodium-dependent phosphate transporter
PF3D7_1341200	N/A	60S ribosomal protein L18, putative
PF3D7_1341500	ISC1	inner membrane complex suture component, putative
PF3D7_1342900	AP2-HS	AP2 domain transcription factor AP2-HS
PF3D7_1343100	N/A	conserved Plasmodium protein, unknown function
PF3D7_1343400	RAD5	DNA repair protein RAD5, putative
PF3D7_1343800	N/A	VPS13 domain-containing protein, putative
PF3D7_1344700	N/A	conserved Plasmodium protein, unknown function
PF3D7_1344900	N/A	conserved Plasmodium protein, unknown function
PF3D7_1347700	ECT	ethanolamine-phosphate cytidylyltransferase
PF3D7_1349300	TKL3	tyrosine kinase-like protein
PF3D7_1349500	N/A	conserved Plasmodium protein, unknown function
PF3D7_1350100	KRS1	lysine--tRNA ligase
PF3D7_1351000	N/A	phosphatidylinositol transfer protein, putative
PF3D7_1351400	N/A	60S ribosomal protein L17, putative
PF3D7_1352000	N/A	GTP-binding protein, putative
PF3D7_1352400	N/A	conserved Plasmodium protein, unknown function
PF3D7_1352700	AQR	intron-binding protein aquarius, putative
PF3D7_1352800	MON1	vacuolar fusion protein MON1, putative
PF3D7_1353300	N/A	conserved Plasmodium protein, unknown function
PF3D7_1353400	N/A	Ran-binding protein, putative
PF3D7_1356100	N/A	conserved Plasmodium protein, unknown function
PF3D7_1356800	ARK3	serine/threonine protein kinase ARK3, putative
PF3D7_1357400	N/A	conserved Plasmodium protein, unknown function
PF3D7_1357700	UTP21	U3 small nucleolar RNA-associated protein 21, putative
PF3D7_1358200	N/A	conserved Plasmodium protein, unknown function
PF3D7_1358500	N/A	zinc finger protein, putative
PF3D7_1358700	YOP1L	YOP1-like protein, putative
PF3D7_1359000	N/A	conserved Plasmodium protein, unknown function
PF3D7_1359700	N/A	conserved Plasmodium protein, unknown function
PF3D7_1360700	PIAS	E3 SUMO-protein ligase PIAS, putative
PF3D7_1361100	SEC24A	protein transport protein Sec24A
PF3D7_1361200	N/A	conserved Plasmodium protein, unknown function
PF3D7_1362500	EXO	3'-5' exonuclease, putative
PF3D7_1362700	N/A	conserved Plasmodium protein, unknown function
PF3D7_1362800	N/A	conserved Plasmodium protein, unknown function
PF3D7_1363100	N/A	conserved Plasmodium protein, unknown function
PF3D7_1363500	CCR4-2	CCR4 domain-containing protein 2, putative
PF3D7_1364000	N/A	conserved protein, unknown function
PF3D7_1364200	NUP205	nucleoporin NUP205, putative
PF3D7_1364400	N/A	conserved Plasmodium protein, unknown function
PF3D7_1364800	RPB5	DNA-directed RNA polymerases I, II, and III subunit RPABC1, putative
PF3D7_1366300	N/A	conserved Plasmodium protein, unknown function
PF3D7_1366400	RHOP148	rhoptry protein RHOP148
PF3D7_1366700	N/A	conserved Plasmodium protein, unknown function
PF3D7_1367700	AlaRS	alanine--tRNA ligase
PF3D7_1368800	ERCC4	DNA repair endonuclease XPF, putative
PF3D7_1369000	GPAA1	glycosylphosphatidylinositol anchor attachment 1 protein, putative
PF3D7_1369200	N/A	conserved Plasmodium protein, unknown function
PF3D7_1369400	N/A	conserved Plasmodium protein, unknown function
PF3D7_1369500	N/A	conserved protein, unknown function
PF3D7_1372400	ACS4	acyl-CoA synthetase
PF3D7_1401600	N/A	Plasmodium exported protein (PHISTb), unknown function
PF3D7_1402300	RPN6	26S proteasome regulatory subunit RPN6
PF3D7_1402800	N/A	conserved Plasmodium protein, unknown function
PF3D7_1403100	CAPD2	condensin complex subunit 1, putative
PF3D7_1403700	TRAM	translocation associated membrane protein, putative
PF3D7_1405300	N/A	conserved Plasmodium protein, unknown function
PF3D7_1405700	N/A	RING zinc finger protein, putative
PF3D7_1406100	N/A	tubby domain-containing protein, putative
PF3D7_1407000	CCp3	LCCL domain-containing protein
PF3D7_1407300	PRP38B	pre-mRNA-splicing factor 38B, putative
PF3D7_1407500	TRM112	multifunctional methyltransferase subunit TRM112, putative
PF3D7_1408200	AP2-G2	AP2 domain transcription factor AP2-G2
PF3D7_1408400	FANCJ	FANCJ-like helicase, putative
PF3D7_1408700	N/A	conserved protein, unknown function
PF3D7_1410200	CTPS	CTP synthase
PF3D7_1410300	N/A	WD repeat-containing protein, putative
PF3D7_1410900	N/A	ribosome maturation protein SBDS, putative
PF3D7_1412100	MCMBP	mini-chromosome maintenance complex-binding protein
PF3D7_1412400	N/A	conserved Plasmodium protein, unknown function
PF3D7_1412600	DHS	deoxyhypusine synthase
PF3D7_1413700	N/A	DET1 domain-containing protein, putative
PF3D7_1414300	N/A	60S ribosomal protein L10, putative
PF3D7_1414500	ABCk2	atypical protein kinase, ABC-1 family, putative
PF3D7_1415000	UDG	uracil-DNA glycosylase
PF3D7_1415400	N/A	Btz domain-containing protein, putative
PF3D7_1415900	N/A	zinc finger protein, putative
PF3D7_1416200	MCA3	metacaspase-3
PF3D7_1417200	NOT1	CCR4-NOT transcription complex subunit NOT1, putative
PF3D7_1417300	ATG4	cysteine protease ATG4, putative
PF3D7_1417600	N/A	ookinete surface and oocyst capsule protein OSCP, putative
PF3D7_1418900	DBP4	ATP-dependent RNA helicase DBP4, putative
PF3D7_1419000	N/A	conserved Plasmodium protein, unknown function
PF3D7_1419600	N/A	conserved Plasmodium protein, unknown function
PF3D7_1419800	GR	glutathione reductase
PF3D7_1421100	N/A	conserved Plasmodium protein, unknown function
PF3D7_1422300	N/A	DnaJ protein, putative
PF3D7_1422400	N/A	nucleolar RNA-associated protein, putative
PF3D7_1422500	HRD1	ERAD-associated E3 ubiquitin-protein ligase HRD1
PF3D7_1422800	ARP4	actin-related protein ARP4
PF3D7_1423300	PP7	serine/threonine protein phosphatase 7
PF3D7_1423800	VPS3	vacuolar protein sorting-associated protein 3, putative
PF3D7_1425400	N/A	DEAD/DEAH box helicase, putative
PF3D7_1425800	N/A	conserved Plasmodium protein, unknown function
PF3D7_1426700	PEPC	phosphoenolpyruvate carboxylase
PF3D7_1426800	N/A	conserved Plasmodium protein, unknown function
PF3D7_1427500	MSH2-1	DNA mismatch repair protein MSH2, putative
PF3D7_1428500	N/A	protein kinase, putative
PF3D7_1428800	N/A	transcription initiation TFIID-like, putative
PF3D7_1428900	N/A	conserved Plasmodium protein, unknown function
PF3D7_1429000	N/A	protein archease, putative
PF3D7_1429200	ApiAP2	AP2 domain transcription factor AP2-O3, putative
PF3D7_1429400	N/A	rRNA (adenosine-2'-O-)-methyltransferase, putative
PF3D7_1429800	N/A	coatomer subunit beta, putative
PF3D7_1430300	N/A	acid phosphatase, putative
PF3D7_1430700	GDH2	NADP-specific glutamate dehydrogenase
PF3D7_1431300	LSG1	large subunit GTPase 1, putative
PF3D7_1431500	MAPK1	mitogen-activated protein kinase 1
PF3D7_1432300	N/A	conserved Plasmodium protein, unknown function
PF3D7_1433400	PHD2	PHD finger protein PHD2, putative
PF3D7_1433900	N/A	protein kinase, putative
PF3D7_1435300	N/A	glutamate synthase [NADH], putative
PF3D7_1435600	N/A	conserved Plasmodium protein, unknown function
PF3D7_1436100	N/A	conserved Plasmodium membrane protein, unknown function
PF3D7_1436200	BCP1	basal complex protein BCP1
PF3D7_1436300	PTEX150	translocon component PTEX150
PF3D7_1437000	N/A	N-acetyltransferase, GNAT family, putative
PF3D7_1437400	PANK2	pantothenate kinase 2
PF3D7_1438400	MCA2	metacaspase-2
PF3D7_1438500	CPSF3	cleavage and polyadenylation specificity factor subunit 3, putative
PF3D7_1439100	N/A	DEAD/DEAH box helicase, putative
PF3D7_1440000	N/A	conserved Plasmodium protein, unknown function
PF3D7_1440100	N/A	cohesin complex subunit, putative
PF3D7_1440400	N/A	zinc finger protein, putative
PF3D7_1440700	AP3M	AP-3 complex subunit mu, putative
PF3D7_1440800	MFS6	major facilitator superfamily domain-containing protein, putative
PF3D7_1441200	N/A	60S ribosomal protein L1, putative
PF3D7_1441300	N/A	serine/threonine protein kinase, putative
PF3D7_1441600	N/A	acid cluster protein 33 homologue, putative
PF3D7_1442400	KIC9	protein KIC9
PF3D7_1442700	N/A	conserved Plasmodium protein, unknown function
PF3D7_1443000	SRPK2	serine/threonine protein kinase
PF3D7_1443100	N/A	conserved Plasmodium protein, unknown function
PF3D7_1443600	N/A	gamma-tubulin complex component, putative
PF3D7_1443800	CWC24	pre-mRNA-splicing factor CWC24, putative
PF3D7_1445400	CLK1	protein serine/threonine kinase-1
PF3D7_1445800	N/A	conserved Plasmodium membrane protein, unknown function
PF3D7_1446400	pdhB	pyruvate dehydrogenase E1 component subunit beta
PF3D7_1446500	NUP313	nucleoporin NUP313, putative
PF3D7_1448000	UTP12	U3 small nucleolar RNA-associated protein 12, putative
PF3D7_1448500	N/A	conserved Plasmodium protein, unknown function
PF3D7_1449700	RRP6	exosome complex exonuclease RRP6
PF3D7_1450000	N/A	serine/threonine protein kinase, putative
PF3D7_1450400	N/A	E3 ubiquitin-protein ligase ZNF598, putative
PF3D7_1450500	N/A	conserved Plasmodium protein, unknown function
PF3D7_1451000	N/A	conserved Plasmodium protein, unknown function
PF3D7_1451200	N/A	conserved Plasmodium protein, unknown function
PF3D7_1452400	N/A	conserved Plasmodium protein, unknown function
PF3D7_1452600	N/A	conserved Plasmodium protein, unknown function
PF3D7_1453000	N/A	conserved Plasmodium protein, unknown function
PF3D7_1453200	N/A	conserved Plasmodium protein, unknown function
PF3D7_1453800	GluPho	glucose-6-phosphate dehydrogenase-6-phosphogluconolactonase
PF3D7_1454700	6PGD	6-phosphogluconate dehydrogenase, decarboxylating
PF3D7_1455500	N/A	AP-1 complex subunit gamma, putative
PF3D7_1455700	N/A	conserved Plasmodium protein, unknown function
PF3D7_1456500	N/A	STAG domain-containing protein, putative
PF3D7_1456700	N/A	conserved Plasmodium protein, unknown function
PF3D7_1456900	N/A	conserved protein, unknown function
PF3D7_1457400	N/A	conserved Plasmodium protein, unknown function
PF3D7_1457500	VPS4	vacuolar protein sorting-associated protein 4
PF3D7_1457900	N/A	conserved Plasmodium protein, unknown function
PF3D7_1458300	N/A	alpha/beta hydrolase, putative
PF3D7_1458500	SAS4	spindle assembly abnormal protein 4, putative
PF3D7_1458600	N/A	zinc finger protein, putative
PF3D7_1458800	N/A	DNA-directed RNA polymerase III subunit RPC5, putative
PF3D7_1460500	N/A	conserved Plasmodium protein, unknown function
PF3D7_1461100	N/A	conserved Plasmodium protein, unknown function
PF3D7_1461800	N/A	conserved Plasmodium protein, unknown function
PF3D7_1462400	N/A	conserved Plasmodium protein, unknown function
PF3D7_1462900	N/A	AAA ATPase, putative
PF3D7_1464500	N/A	conserved Plasmodium membrane protein, unknown function
PF3D7_1464600	UIS2	serine/threonine protein phosphatase UIS2, putative
PF3D7_1464700	N/A	ATP synthase (C/AC39) subunit, putative
PF3D7_1465100	COG6	conserved oligomeric Golgi complex subunit 6, putative
PF3D7_1465200	MED4	mediator of RNA polymerase II transcription subunit 4, putative
PF3D7_1465300	N/A	ribonuclease Z, putative
PF3D7_1466100	PPKL	protein phosphatase containing kelch-like domains
PF3D7_1466200	HDP1	homeodomain-like protein HDP1
PF3D7_1466300	RPN2	26S proteasome regulatory subunit RPN2, putative
PF3D7_1466900	N/A	conserved Plasmodium protein, unknown function
PF3D7_1467600	N/A	conserved Plasmodium protein, unknown function
PF3D7_1468800	U2AF2	splicing factor U2AF large subunit, putative
PF3D7_1469800	N/A	conserved Plasmodium protein, unknown function
PF3D7_1470100	N/A	conserved Plasmodium protein, unknown function
PF3D7_1472200	HDA1	histone deacetylase, putative
PF3D7_1472300	N/A	conserved protein, unknown function
PF3D7_1473400	N/A	conserved protein, unknown function
PF3D7_1474000	N/A	conserved Plasmodium protein, unknown function
PF3D7_1475400	CRMP4	cysteine repeat modular protein 4
PF3D7_1476600	N/A	Plasmodium exported protein, unknown function
PF3D7_1476800	N/A	lysophospholipase, putative
PF3D7_0102200	RESA	ring-infected erythrocyte surface antigen
PF3D7_0103200	NT4	nucleoside transporter 4
PF3D7_0103900	PIESP15	parasite-infected erythrocyte surface protein
PF3D7_0104100	N/A	protein E140, putative
PF3D7_0104800	NPT1	novel putative transporter 1, putative
PF3D7_0105200	N/A	heptatricopeptide repeat and RAP domain-containing protein, putative
PF3D7_0107500	NCR1	Niemann-Pick type C1-related protein
PF3D7_0113900	CBP1	CX3CL1-binding protein 1
PF3D7_0202000	KAHRP	knob-associated histidine-rich protein
PF3D7_0204700	HT1	hexose transporter
PF3D7_0207600	SERA5	serine repeat antigen 5
PF3D7_0210200	N/A	conserved Plasmodium protein, unknown function
PF3D7_0210600	CERLI1	protein CERLI1
PF3D7_0211800	AsnRS	asparagine--tRNA ligase
PF3D7_0212400	N/A	conserved Plasmodium membrane protein, unknown function
PF3D7_0212500	N/A	conserved Plasmodium protein, unknown function
PF3D7_0215300	ACS8	acyl-CoA synthetase
PF3D7_0217500	CDPK1	calcium-dependent protein kinase 1
PF3D7_0302500	CLAG3.1	cytoadherence linked asexual protein 3.1
PF3D7_0304100	IMC1e	inner membrane complex protein 1e, putative
PF3D7_0308200	CCT7	T-complex protein 1 subunit eta
PF3D7_0316600	FNT	formate-nitrite transporter
PF3D7_0316900	N/A	E3 ubiquitin-protein ligase, putative
PF3D7_0319700	ABCI3	ABC transporter I family member 1, putative
PF3D7_0402000	N/A	Plasmodium exported protein (PHISTa), unknown function
PF3D7_0423500	GAPM2	glideosome associated protein with multiple membrane spans 2
PF3D7_0424500	FIKK4.1	serine/threonine protein kinase, FIKK family
PF3D7_0500800	MESA	mature parasite-infected erythrocyte surface antigen
PF3D7_0501600	RAP2	rhoptry-associated protein 2
PF3D7_0506900	ROM4	rhomboid protease ROM4
PF3D7_0508000	P38	6-cysteine protein
PF3D7_0508900	AAP6	protein AAP6
PF3D7_0513600	N/A	deoxyribodipyrimidine photo-lyase, putative
PF3D7_0520900	SAHH	adenosylhomocysteinase
PF3D7_0522600	N/A	magnesium transporter NIPA, putative
PF3D7_0523000	MDR1	multidrug resistance protein 1
PF3D7_0525800	IMC1g	inner membrane complex protein 1g, putative
PF3D7_0528400	DHHC7	palmitoyltransferase DHHC7
PF3D7_0529800	N/A	conserved Plasmodium protein, unknown function
PF3D7_0532300	N/A	Plasmodium exported protein (PHISTb), unknown function
PF3D7_0604100	SIP2	AP2 domain transcription factor
PF3D7_0607700	N/A	conserved Plasmodium protein, unknown function
PF3D7_0609100	ZIP1	zinc transporter ZIP1, putative
PF3D7_0609800	DHHC2	palmitoyltransferase DHHC2, putative
PF3D7_0612200	LRR6	leucine-rich repeat protein
PF3D7_0613900	MyoE	myosin E, putative
PF3D7_0614300	MFR1	major facilitator superfamily-related transporter, putative
PF3D7_0618000	N/A	conserved Plasmodium membrane protein, unknown function
PF3D7_0621200	PDX1	pyridoxine biosynthesis protein PDX1
PF3D7_0626800	PyrK	pyruvate kinase
PF3D7_0628300	CEPT	choline/ethanolaminephosphotransferase, putative
PF3D7_0702500	N/A	Plasmodium exported protein, unknown function
PF3D7_0703900	N/A	conserved Plasmodium membrane protein, unknown function
PF3D7_0704800	PPM12	protein phosphatase PPM12, putative
PF3D7_0705400	MCM7	DNA replication licensing factor MCM7
PF3D7_0708400	HSP90	heat shock protein 90
PF3D7_0714300	DHHC4	palmitoyltransferase DHHC4, putative
PF3D7_0715200	N/A	conserved Plasmodium protein, unknown function
PF3D7_0731600	ACS5	acyl-CoA synthetase
PF3D7_0804500	N/A	conserved Plasmodium membrane protein, unknown function
PF3D7_0806800	N/A	V-type proton ATPase subunit a, putative
PF3D7_0807300	RAB18	ras-related protein Rab-18
PF3D7_0812100	N/A	proteasome activator complex subunit 4, putative
PF3D7_0818200	14-3-3I	14-3-3 protein
PF3D7_0821000	N/A	conserved Plasmodium protein, unknown function
PF3D7_0822900	PIC2	PhIL1-interacting candidate PIC2
PF3D7_0904800	RPA1	replication protein A1, small fragment
PF3D7_0904900	CuTP	copper-transporting ATPase
PF3D7_0905100	NUP221	nucleoporin NUP221, putative
PF3D7_0910300	N/A	conserved protein, unknown function
PF3D7_0916400	N/A	conserved Plasmodium protein, unknown function
PF3D7_0919900	RCC-PIP	regulator of chromosome condensation-PP1-interacting protein
PF3D7_0922200	SAMS	S-adenosylmethionine synthetase
PF3D7_0930300	MSP1	merozoite surface protein 1
PF3D7_0935800	CLAG9	cytoadherence linked asexual protein 9
PF3D7_1003600	IMC1c	inner membrane complex protein 1c, putative
PF3D7_1005500	UPF1	regulator of nonsense transcripts 1, putative
PF3D7_1008700	N/A	tubulin beta chain
PF3D7_1008900	AK1	adenylate kinase
PF3D7_1012400	HGPRT	hypoxanthine-guanine phosphoribosyltransferase
PF3D7_1012900	ATG18	autophagy-related protein 18
PF3D7_1019900	ATG8	autophagy-related protein 8
PF3D7_1025900	N/A	conserved protein, unknown function
PF3D7_1027800	RPL3	60S ribosomal protein L3
PF3D7_1029600	ADA	adenosine deaminase
PF3D7_1033200	ETRAMP10.2	early transcribed membrane protein 10.2
PF3D7_1113100	PRL	protein tyrosine phosphatase
PF3D7_1116100	N/A	serine esterase, putative
PF3D7_1119800	ASF1	alternative splicing factor ASF-1, putative
PF3D7_1121000	DHHC3	palmitoyltransferase DHHC3
PF3D7_1123500	GP2	golgi protein 2
PF3D7_1124600	EK	ethanolamine kinase
PF3D7_1126000	ThrRS	threonine--tRNA ligase
PF3D7_1129900	MFR5	major facilitator superfamily-related transporter, putative
PF3D7_1130200	PfP0	60S ribosomal protein P0
PF3D7_1132200	TCP1	T-complex protein 1 subunit alpha
PF3D7_1132300	N/A	nucleic acid binding protein, putative
PF3D7_1136800	N/A	DnaJ protein, putative
PF3D7_1140400	N/A	conserved Plasmodium protein, unknown function
PF3D7_1142100	N/A	conserved Plasmodium protein, unknown function
PF3D7_1143200	N/A	DnaJ protein, putative
PF3D7_1149200	RESA3	ring-infected erythrocyte surface antigen
PF3D7_1200700	ACS7	acyl-CoA synthetase
PF3D7_1202100	SRAP1	SRAP domain-containing protein, putative
PF3D7_1211600	LSD1	lysine-specific histone demethylase 1, putative
PF3D7_1211900	ATP4	non-SERCA-type Ca2+ -transporting P-ATPase
PF3D7_1212500	GAT	glycerol-3-phosphate 1-O-acyltransferase
PF3D7_1214900	N/A	conserved protein, unknown function
PF3D7_1218500	DRPC	dynamin-like protein, putative
PF3D7_1219600	ATP2	phospholipid-transporting ATPase 2
PF3D7_1222300	GRP94	endoplasmin, putative
PF3D7_1222700	GAP45	glideosome-associated protein 45
PF3D7_1223400	N/A	phospholipid-transporting ATPase, putative
PF3D7_1224100	N/A	conserved protein, unknown function
PF3D7_1225800	UBA1	ubiquitin-activating enzyme E1
PF3D7_1226900	PV2	parasitophorous vacuolar protein 2
PF3D7_1229300	PIC1	PhIL1-interacting candidate PIC1
PF3D7_1235200	VP2	V-type K+-independent H+-translocating inorganic pyrophosphatase
PF3D7_1238800	ACS11	acyl-CoA synthetase
PF3D7_1246300	KIC4	protein KIC4
PF3D7_1246400	MTIP	myosin A-tail interacting protein
PF3D7_1252100	RON3	rhoptry neck protein 3
PF3D7_1302800	N/A	40S ribosomal protein S7, putative
PF3D7_1304100	LigI	DNA ligase I
PF3D7_1309200	PPM6	protein phosphatase PPM6, putative
PF3D7_1310700	PIC5	PhIL1-interacting candidate PIC5
PF3D7_1311800	M1AAP	M1-family alanyl aminopeptidase
PF3D7_1315300	N/A	conserved protein, unknown function
PF3D7_1318000	N/A	conserved protein, unknown function
PF3D7_1320600	RAB11a	ras-related protein Rab-11A
PF3D7_1328100	N/A	proteasome subunit beta type-7, putative
PF3D7_1335100	MSP7	merozoite surface protein 7
PF3D7_1338300	EF-1gamma	elongation factor 1-gamma, putative
PF3D7_1342400	CK2beta2	casein kinase II beta chain
PF3D7_1344200	GRP170	endoplasmic reticulum chaperone GRP170
PF3D7_1345800	N/A	conserved Plasmodium protein, unknown function
PF3D7_1346100	SEC61A	protein transport protein SEC61 subunit alpha
PF3D7_1346400	N/A	VPS13 domain-containing protein, putative
PF3D7_1347200	NT1	nucleoside transporter 1
PF3D7_1349200	N/A	glutamate--tRNA ligase, putative
PF3D7_1351700	IMC1f	inner membrane complex protein 1f, putative
PF3D7_1353200	MAHRP2	membrane associated histidine-rich protein 2
PF3D7_1359600	N/A	conserved Plasmodium protein, unknown function
PF3D7_1359900	N/A	conserved Plasmodium membrane protein, unknown function
PF3D7_1360800	FLN	falcilysin
PF3D7_1361900	PCNA1	proliferating cell nuclear antigen 1
PF3D7_1362400	Pcalp	calpain
PF3D7_1365700	N/A	SNARE associated Golgi protein, putative
PF3D7_1401200	N/A	Plasmodium exported protein, unknown function
PF3D7_1407200	N/A	conserved Plasmodium protein, unknown function
PF3D7_1408000	PMII	plasmepsin II
PF3D7_1409600	N/A	histidine phosphatase, putative
PF3D7_1424100	RPL5	60S ribosomal protein L5, putative
PF3D7_1434500	N/A	dynein-related AAA-type ATPase, putative
PF3D7_1437200	N/A	ribonucleoside-diphosphate reductase large subunit, putative
PF3D7_1438100	SEC62	translocation protein SEC62, putative
PF3D7_1441500	N/A	conserved Plasmodium protein, unknown function
PF3D7_1442300	tRIP	tRNA import protein tRIP
PF3D7_1451100	eEF2	elongation factor 2
PF3D7_1455300	N/A	conserved protein, unknown function
PF3D7_1458000	FP1	cysteine proteinase falcipain 1
PF3D7_1460100	FCP	FYVE and coiled-coil domain-containing protein
PF3D7_1460600	ISP3	inner membrane complex sub-compartment protein 3
PF3D7_1461400	N/A	MORN repeat protein, putative
PF3D7_1462300	N/A	GTP-binding protein, putative
PF3D7_1468700	eIF4A	eukaryotic initiation factor 4A
PF3D7_1478600	PTP3	EMP1-trafficking protein

## Sheet: PF3D7_DuallyModifiedProteins
Protein	Name	Product	PF3D7.Essentiality
PF3D7_0102200	RESA	ring-infected erythrocyte surface antigen	Not Essential
PF3D7_0103200	NT4	nucleoside transporter 4	Not Essential
PF3D7_0103900	PIESP15	parasite-infected erythrocyte surface protein	Not Essential
PF3D7_0104100	N/A	protein E140, putative	Not Essential
PF3D7_0104800	NPT1	novel putative transporter 1, putative	Not Essential
PF3D7_0105200	N/A	heptatricopeptide repeat and RAP domain-containing protein, putative	Not Essential
PF3D7_0107500	NCR1	Niemann-Pick type C1-related protein	Not Essential
PF3D7_0113900	CBP1	CX3CL1-binding protein 1	Not Essential
PF3D7_0202000	KAHRP	knob-associated histidine-rich protein	Not Essential
PF3D7_0204700	HT1	hexose transporter	Not Essential
PF3D7_0207600	SERA5	serine repeat antigen 5	Not Essential
PF3D7_0210200	N/A	conserved Plasmodium protein, unknown function	Not Essential
PF3D7_0210600	CERLI1	protein CERLI1	Not Essential
PF3D7_0211800	AsnRS	asparagine--tRNA ligase	Not Essential
PF3D7_0212400	N/A	conserved Plasmodium membrane protein, unknown function	Not Essential
PF3D7_0212500	N/A	conserved Plasmodium protein, unknown function	Not Essential
PF3D7_0215300	ACS8	acyl-CoA synthetase	Not Essential
PF3D7_0217500	CDPK1	calcium-dependent protein kinase 1	Essential
PF3D7_0302500	CLAG3.1	cytoadherence linked asexual protein 3.1	Not Essential
PF3D7_0304100	IMC1e	inner membrane complex protein 1e, putative	Not Essential
PF3D7_0308200	CCT7	T-complex protein 1 subunit eta	Not Essential
PF3D7_0316600	FNT	formate-nitrite transporter	Not Essential
PF3D7_0316900	N/A	E3 ubiquitin-protein ligase, putative	Not Essential
PF3D7_0319700	ABCI3	ABC transporter I family member 1, putative	Not Essential
PF3D7_0402000	N/A	Plasmodium exported protein (PHISTa), unknown function	Not Essential
PF3D7_0423500	GAPM2	glideosome associated protein with multiple membrane spans 2	Not Essential
PF3D7_0424500	FIKK4.1	serine/threonine protein kinase, FIKK family	Not Essential
PF3D7_0500800	MESA	mature parasite-infected erythrocyte surface antigen	Not Essential
PF3D7_0501600	RAP2	rhoptry-associated protein 2	Not Essential
PF3D7_0506900	ROM4	rhomboid protease ROM4	Not Essential
PF3D7_0508000	P38	6-cysteine protein	Not Essential
PF3D7_0508900	AAP6	protein AAP6	Not Essential
PF3D7_0513600	N/A	deoxyribodipyrimidine photo-lyase, putative	Not Essential
PF3D7_0520900	SAHH	adenosylhomocysteinase	Not Essential
PF3D7_0522600	N/A	magnesium transporter NIPA, putative	Not Essential
PF3D7_0523000	MDR1	multidrug resistance protein 1	Not Essential
PF3D7_0525800	IMC1g	inner membrane complex protein 1g, putative	Not Essential
PF3D7_0528400	DHHC7	palmitoyltransferase DHHC7	Not Essential
PF3D7_0529800	N/A	conserved Plasmodium protein, unknown function	Not Essential
PF3D7_0532300	N/A	Plasmodium exported protein (PHISTb), unknown function	Not Essential
PF3D7_0604100	SIP2	AP2 domain transcription factor	Not Essential
PF3D7_0607700	N/A	conserved Plasmodium protein, unknown function	Not Essential
PF3D7_0609100	ZIP1	zinc transporter ZIP1, putative	Not Essential
PF3D7_0609800	DHHC2	palmitoyltransferase DHHC2, putative	Not Essential
PF3D7_0612200	LRR6	leucine-rich repeat protein	Not Essential
PF3D7_0613900	MyoE	myosin E, putative	Not Essential
PF3D7_0614300	MFR1	major facilitator superfamily-related transporter, putative	Not Essential
PF3D7_0618000	N/A	conserved Plasmodium membrane protein, unknown function	Not Essential
PF3D7_0621200	PDX1	pyridoxine biosynthesis protein PDX1	Not Essential
PF3D7_0626800	PyrK	pyruvate kinase	Not Essential
PF3D7_0628300	CEPT	choline/ethanolaminephosphotransferase, putative	Not Essential
PF3D7_0702500	N/A	Plasmodium exported protein, unknown function	Not Essential
PF3D7_0703900	N/A	conserved Plasmodium membrane protein, unknown function	Not Essential
PF3D7_0704800	PPM12	protein phosphatase PPM12, putative	Not Essential
PF3D7_0705400	MCM7	DNA replication licensing factor MCM7	Not Essential
PF3D7_0708400	HSP90	heat shock protein 90	Not Essential
PF3D7_0714300	DHHC4	palmitoyltransferase DHHC4, putative	Not Essential
PF3D7_0715200	N/A	conserved Plasmodium protein, unknown function	Not Essential
PF3D7_0731600	ACS5	acyl-CoA synthetase	Not Essential
PF3D7_0804500	N/A	conserved Plasmodium membrane protein, unknown function	Not Essential
PF3D7_0806800	N/A	V-type proton ATPase subunit a, putative	Not Essential
PF3D7_0807300	RAB18	ras-related protein Rab-18	Not Essential
PF3D7_0812100	N/A	proteasome activator complex subunit 4, putative	Not Essential
PF3D7_0818200	14-3-3I	14-3-3 protein	Not Essential
PF3D7_0821000	N/A	conserved Plasmodium protein, unknown function	Not Essential
PF3D7_0822900	PIC2	PhIL1-interacting candidate PIC2	Not Essential
PF3D7_0904800	RPA1	replication protein A1, small fragment	Not Essential
PF3D7_0904900	CuTP	copper-transporting ATPase	Not Essential
PF3D7_0905100	NUP221	nucleoporin NUP221, putative	Not Essential
PF3D7_0910300	N/A	conserved protein, unknown function	Not Essential
PF3D7_0916400	N/A	conserved Plasmodium protein, unknown function	Not Essential
PF3D7_0919900	RCC-PIP	regulator of chromosome condensation-PP1-interacting protein	Not Essential
PF3D7_0922200	SAMS	S-adenosylmethionine synthetase	Not Essential
PF3D7_0930300	MSP1	merozoite surface protein 1	Not Essential
PF3D7_0935800	CLAG9	cytoadherence linked asexual protein 9	Not Essential
PF3D7_1003600	IMC1c	inner membrane complex protein 1c, putative	Not Essential
PF3D7_1005500	UPF1	regulator of nonsense transcripts 1, putative	Not Essential
PF3D7_1008700	N/A	tubulin beta chain	Not Essential
PF3D7_1008900	AK1	adenylate kinase	Not Essential
PF3D7_1012400	HGPRT	hypoxanthine-guanine phosphoribosyltransferase	Not Essential
PF3D7_1012900	ATG18	autophagy-related protein 18	Not Essential
PF3D7_1019900	ATG8	autophagy-related protein 8	Not Essential
PF3D7_1025900	N/A	conserved protein, unknown function	Not Essential
PF3D7_1027800	RPL3	60S ribosomal protein L3	Not Essential
PF3D7_1029600	ADA	adenosine deaminase	Essential
PF3D7_1033200	ETRAMP10.2	early transcribed membrane protein 10.2	Not Essential
PF3D7_1113100	PRL	protein tyrosine phosphatase	Not Essential
PF3D7_1116100	N/A	serine esterase, putative	Not Essential
PF3D7_1119800	ASF1	alternative splicing factor ASF-1, putative	Not Essential
PF3D7_1121000	DHHC3	palmitoyltransferase DHHC3	Not Essential
PF3D7_1123500	GP2	golgi protein 2	Not Essential
PF3D7_1124600	EK	ethanolamine kinase	Not Essential
PF3D7_1126000	ThrRS	threonine--tRNA ligase	Not Essential
PF3D7_1129900	MFR5	major facilitator superfamily-related transporter, putative	Not Essential
PF3D7_1130200	PfP0	60S ribosomal protein P0	Not Essential
PF3D7_1132200	TCP1	T-complex protein 1 subunit alpha	Not Essential
PF3D7_1132300	N/A	nucleic acid binding protein, putative	Not Essential
PF3D7_1136800	N/A	DnaJ protein, putative	Not Essential
PF3D7_1140400	N/A	conserved Plasmodium protein, unknown function	Not Essential
PF3D7_1142100	N/A	conserved Plasmodium protein, unknown function	Not Essential
PF3D7_1143200	N/A	DnaJ protein, putative	Not Essential
PF3D7_1149200	RESA3	ring-infected erythrocyte surface antigen	Not Essential
PF3D7_1200700	ACS7	acyl-CoA synthetase	Not Essential
PF3D7_1202100	SRAP1	SRAP domain-containing protein, putative	Not Essential
PF3D7_1211600	LSD1	lysine-specific histone demethylase 1, putative	Not Essential
PF3D7_1211900	ATP4	non-SERCA-type Ca2+ -transporting P-ATPase	Not Essential
PF3D7_1212500	GAT	glycerol-3-phosphate 1-O-acyltransferase	Not Essential
PF3D7_1214900	N/A	conserved protein, unknown function	Not Essential
PF3D7_1218500	DRPC	dynamin-like protein, putative	Not Essential
PF3D7_1219600	ATP2	phospholipid-transporting ATPase 2	Not Essential
PF3D7_1222300	GRP94	endoplasmin, putative	Not Essential
PF3D7_1222700	GAP45	glideosome-associated protein 45	Not Essential
PF3D7_1223400	N/A	phospholipid-transporting ATPase, putative	Not Essential
PF3D7_1224100	N/A	conserved protein, unknown function	Not Essential
PF3D7_1225800	UBA1	ubiquitin-activating enzyme E1	Not Essential
PF3D7_1226900	PV2	parasitophorous vacuolar protein 2	Not Essential
PF3D7_1229300	PIC1	PhIL1-interacting candidate PIC1	Not Essential
PF3D7_1235200	VP2	V-type K+-independent H+-translocating inorganic pyrophosphatase	Not Essential
PF3D7_1238800	ACS11	acyl-CoA synthetase	Not Essential
PF3D7_1246300	KIC4	protein KIC4	Not Essential
PF3D7_1246400	MTIP	myosin A-tail interacting protein	Essential
PF3D7_1252100	RON3	rhoptry neck protein 3	Not Essential
PF3D7_1302800	N/A	40S ribosomal protein S7, putative	Not Essential
PF3D7_1304100	LigI	DNA ligase I	Not Essential
PF3D7_1309200	PPM6	protein phosphatase PPM6, putative	Not Essential
PF3D7_1310700	PIC5	PhIL1-interacting candidate PIC5	Not Essential
PF3D7_1311800	M1AAP	M1-family alanyl aminopeptidase	Not Essential
PF3D7_1315300	N/A	conserved protein, unknown function	Not Essential
PF3D7_1318000	N/A	conserved protein, unknown function	Not Essential
PF3D7_1320600	RAB11a	ras-related protein Rab-11A	Not Essential
PF3D7_1328100	N/A	proteasome subunit beta type-7, putative	Not Essential
PF3D7_1335100	MSP7	merozoite surface protein 7	Not Essential
PF3D7_1338300	EF-1gamma	elongation factor 1-gamma, putative	Not Essential
PF3D7_1342400	CK2beta2	casein kinase II beta chain	Not Essential
PF3D7_1344200	GRP170	endoplasmic reticulum chaperone GRP170	Not Essential
PF3D7_1345800	N/A	conserved Plasmodium protein, unknown function	Not Essential
PF3D7_1346100	SEC61A	protein transport protein SEC61 subunit alpha	Not Essential
PF3D7_1346400	N/A	VPS13 domain-containing protein, putative	Not Essential
PF3D7_1347200	NT1	nucleoside transporter 1	Not Essential
PF3D7_1349200	N/A	glutamate--tRNA ligase, putative	Not Essential
PF3D7_1351700	IMC1f	inner membrane complex protein 1f, putative	Not Essential
PF3D7_1353200	MAHRP2	membrane associated histidine-rich protein 2	Not Essential
PF3D7_1359600	N/A	conserved Plasmodium protein, unknown function	Not Essential
PF3D7_1359900	N/A	conserved Plasmodium membrane protein, unknown function	Not Essential
PF3D7_1360800	FLN	falcilysin	Not Essential
PF3D7_1361900	PCNA1	proliferating cell nuclear antigen 1	Not Essential
PF3D7_1362400	Pcalp	calpain	Not Essential
PF3D7_1365700	N/A	SNARE associated Golgi protein, putative	Not Essential
PF3D7_1401200	N/A	Plasmodium exported protein, unknown function	Not Essential
PF3D7_1407200	N/A	conserved Plasmodium protein, unknown function	Not Essential
PF3D7_1408000	PMII	plasmepsin II	Essential
PF3D7_1409600	N/A	histidine phosphatase, putative	Not Essential
PF3D7_1424100	RPL5	60S ribosomal protein L5, putative	Not Essential
PF3D7_1434500	N/A	dynein-related AAA-type ATPase, putative	Not Essential
PF3D7_1437200	N/A	ribonucleoside-diphosphate reductase large subunit, putative	Not Essential
PF3D7_1438100	SEC62	translocation protein SEC62, putative	Not Essential
PF3D7_1441500	N/A	conserved Plasmodium protein, unknown function	Not Essential
PF3D7_1442300	tRIP	tRNA import protein tRIP	Not Essential
PF3D7_1451100	eEF2	elongation factor 2	Not Essential
PF3D7_1455300	N/A	conserved protein, unknown function	Not Essential
PF3D7_1458000	FP1	cysteine proteinase falcipain 1	Not Essential
PF3D7_1460100	FCP	FYVE and coiled-coil domain-containing protein	Not Essential
PF3D7_1460600	ISP3	inner membrane complex sub-compartment protein 3	Not Essential
PF3D7_1461400	N/A	MORN repeat protein, putative	Not Essential
PF3D7_1462300	N/A	GTP-binding protein, putative	Not Essential
PF3D7_1468700	eIF4A	eukaryotic initiation factor 4A	Not Essential
PF3D7_1478600	PTP3	EMP1-trafficking protein	Not Essential
