# Supplementary material for: Complementary crosstalk between palmitoylation and phosphorylation events in MTIP regulates its role during Plasmodium falciparum invasion
Source: Front Cell Infect Microbiol. 2022 Sep 29;12:924424. doi: 10.3389/fcimb.2022.924424 (PMC9556994; doi:10.3389/fcimb.2022.924424)
Supplement: Supplementary Table 7 — The results generated from the k-means clustering of the dually modifiable Plasmodium falciparum 3D7 proteins. [file Table_7.xlsx]

## Sheet: PF3D7_DuallyModifiable_kmeansCl
STRING.Identifiers	Protein	Name	Clustering Method Applied	Cluster.Number	Cluster.Color	Proteins.In.Cluster	Description
36329.A0A143ZWL6	PF3D7_0210200	N/A	kmeans	1	Red	363	Uncharacterized protein
36329.A0A143ZXM2	PF3D7_1021800	SEA1	kmeans	1	Red	363	Schizont egress antigen-1
36329.A0A143ZZC6	PF3D7_1111600	N/A	kmeans	1	Red	363	Endonuclease/exonuclease/phosphatase family protein, putative
36329.A0A144A0A3	PF3D7_1230000	N/A	kmeans	1	Red	363	TBC domain-containing protein, putative
36329.A0A144A533	PF3D7_1461800	N/A	kmeans	1	Red	363	Uncharacterized protein
36329.A0A5K1K8L4	PF3D7_1364400	N/A	kmeans	1	Red	363	Uncharacterized protein
36329.A0A5K1K8M0	PF3D7_1338700	N/A	kmeans	1	Red	363	Uncharacterized protein
36329.A0A5K1K8X4	PF3D7_1344700	N/A	kmeans	1	Red	363	Uncharacterized protein
36329.A0A5K1K919	PF3D7_1362500	EXO	kmeans	1	Red	363	Exonuclease, putative
36329.A0A5K1K929	PF3D7_1363500	CCR4-2	kmeans	1	Red	363	CCR4 domain-containing protein 2, putative
36329.A0A5K1K976	PF3D7_1345800	N/A	kmeans	1	Red	363	Uncharacterized protein
36329.A0A5K1K9G4	PF3D7_1366400	RHOP148	kmeans	1	Red	363	Rhoptry protein RHOP148
36329.Q7KQL3	PF3D7_1020900	ARF1	kmeans	1	Red	363	ADP-ribosylation factor 1; GTP-binding protein involved in protein trafficking; may modulate vesicle budding and uncoating within the Golgi apparatus. ; Belongs to the small GTPase superfamily. Arf family.
36329.B9ZSH8	PF3D7_0102600	FIKK1	kmeans	1	Red	363	Serine/threonine protein kinase, FIKK family
36329.B9ZSI9	PF3D7_0111400	GEXP19	kmeans	1	Red	363	Uncharacterized protein
36329.C0H483	PF3D7_0321900	CARL	kmeans	1	Red	363	Cyclic amine resistance locus protein
36329.C0H487	PF3D7_0403400	N/A	kmeans	1	Red	363	C2H2-type domain-containing protein
36329.C0H4B0	PF3D7_0417400	N/A	kmeans	1	Red	363	Uncharacterized protein
36329.C0H4E1	PF3D7_0516500	MFS1	kmeans	1	Red	363	Major facilitator superfamily domain-containing protein, putative
36329.C0H4F2	PF3D7_0520100	PPM9	kmeans	1	Red	363	Protein phosphatase PPM9, putative
36329.C0H4G1	PF3D7_0523900	N/A	kmeans	1	Red	363	MerC domain-containing protein, putative
36329.C0H4H4	PF3D7_0612400	N/A	kmeans	1	Red	363	Uncharacterized protein
36329.C0H4R8	PF3D7_0805700	FIKK8	kmeans	1	Red	363	Serine/threonine protein kinase, FIKK family
36329.C0H4S0	PF3D7_0806000	N/A	kmeans	1	Red	363	AAA family ATPase, putative
36329.C0H4U4	PF3D7_0813300	N/A	kmeans	1	Red	363	NPL domain-containing protein
36329.C0H4Y6	PF3D7_0827900	PDI8	kmeans	1	Red	363	Protein disulfide-isomerase
36329.C0H4Z7	PF3D7_0831400	N/A	kmeans	1	Red	363	Uncharacterized protein
36329.C0H539	PF3D7_0916400	N/A	kmeans	1	Red	363	Uncharacterized protein
36329.C0H566	PF3D7_0927200	N/A	kmeans	1	Red	363	Zinc finger protein, putative
36329.C0H5F8	PF3D7_1338000	N/A	kmeans	1	Red	363	LMBR1 domain-containing protein, putative
36329.C0H5G2	PF3D7_1340700	RAB11b	kmeans	1	Red	363	Ras-related protein Rab-11B
36329.C0H5G5	PF3D7_1342900	AP2-HS	kmeans	1	Red	363	AP2 domain transcription factor, putative
36329.C0H5G6	PF3D7_1343800	N/A	kmeans	1	Red	363	Uncharacterized protein
36329.C0H5I8	PF3D7_1358200	N/A	kmeans	1	Red	363	Uncharacterized protein
36329.C0H5J3	PF3D7_1359700	N/A	kmeans	1	Red	363	Uncharacterized protein
36329.C0H5K2	PF3D7_1362700	N/A	kmeans	1	Red	363	Uncharacterized protein
36329.C6KSN8	PF3D7_0604000	N/A	kmeans	1	Red	363	Uncharacterized protein
36329.C6KSQ1	PF3D7_0605300	ARK1	kmeans	1	Red	363	Serine/threonine protein kinase; Belongs to the protein kinase superfamily.
36329.C6KSQ7	PF3D7_0605900	N/A	kmeans	1	Red	363	Elongation of fatty acids protein
36329.C6KSQ9	PF3D7_0606100	N/A	kmeans	1	Red	363	RNA-binding protein, putative
36329.C6KSR3	PF3D7_0606500	PTB	kmeans	1	Red	363	Polypyrimidine tract-binding protein, putative
36329.C6KSS0	PF3D7_0607200	N/A	kmeans	1	Red	363	RING zinc finger protein, putative
36329.C6KSU5	PF3D7_0609800	DHHC2	kmeans	1	Red	363	Palmitoyltransferase; Belongs to the DHHC palmitoyltransferase family.
36329.C6KSW1	PF3D7_0611600	BTP1	kmeans	1	Red	363	Basal complex transmembrane protein 1
36329.C6KSW6	PF3D7_0612200	LRR6	kmeans	1	Red	363	Leucine-rich repeat protein
36329.C6KT25	PF3D7_0618500	MDH	kmeans	1	Red	363	Malate dehydrogenase; Belongs to the LDH/MDH superfamily.
36329.C6KT33	PF3D7_0619300	N/A	kmeans	1	Red	363	Uncharacterized protein
36329.C6KT38	PF3D7_0619800	N/A	kmeans	1	Red	363	Uncharacterized protein
36329.C6KT59	PF3D7_0622200	MIAB	kmeans	1	Red	363	Radical SAM protein, putative
36329.C6KT65	PF3D7_0622900	AP2Tel	kmeans	1	Red	363	AP2 domain transcription factor AP2Tel
36329.C6KTA9	PF3D7_0627300	RNF5	kmeans	1	Red	363	E3 ubiquitin-protein ligase RNF5, putative
36329.C6KTC0	PF3D7_0628500	N/A	kmeans	1	Red	363	Uncharacterized protein
36329.C6KTE1	PF3D7_0630600	N/A	kmeans	1	Red	363	DUF4205 domain-containing protein
36329.C6S3B8	PF3D7_0218200	N/A	kmeans	1	Red	363	SUZ domain-containing protein, putative
36329.C6S3C9	PF3D7_1018200	PPP8	kmeans	1	Red	363	Serine/threonine-protein phosphatase
36329.A0A5K1K8Q4	PF3D7_1362400	Pcalp	kmeans	1	Red	363	Calpain; Belongs to the peptidase C2 family.
36329.C0H530	PF3D7_0910100	N/A	kmeans	1	Red	363	Exportin-7, putative
36329.A0A5K1K8Q1	PF3D7_1315900	N/A	kmeans	1	Red	363	Exportin-T; tRNA nucleus export receptor which facilitates tRNA translocation across the nuclear pore complex. ; Belongs to the exportin family.
36329.Q8I333	PF3D7_0911900	ICP	kmeans	1	Red	363	Falstatin
36329.C6KT76	PF3D7_0624000	HK	kmeans	1	Red	363	Phosphotransferase
36329.C0H4L1	PF3D7_0706000	N/A	kmeans	1	Red	363	Importin-7, putative
36329.O77366	PF3D7_0319200	CCR4-4	kmeans	1	Red	363	CCR4 domain-containing protein 4, putative
36329.O77372	PF3D7_0318500	N/A	kmeans	1	Red	363	Uncharacterized protein
36329.O77383	PF3D7_0317400	N/A	kmeans	1	Red	363	DNA replication complex GINS protein, putative
36329.O96158	PF3D7_0206500	N/A	kmeans	1	Red	363	Uncharacterized protein
36329.O96160	PF3D7_0207100	N/A	kmeans	1	Red	363	Uncharacterized protein PFB0315w
36329.O96170	PF3D7_0208300	N/A	kmeans	1	Red	363	Uncharacterized protein
36329.O96171	PF3D7_0208400	N/A	kmeans	1	Red	363	Uncharacterized protein
36329.O96186	PF3D7_0210300	N/A	kmeans	1	Red	363	Monocarboxylate transporter, putative
36329.O96232	PF3D7_0215300	ACS8	kmeans	1	Red	363	Acyl-CoA synthetase
36329.O96243	PF3D7_0216400	VPS45	kmeans	1	Red	363	Vacuolar protein sorting-associated protein 45; Belongs to the STXBP/unc-18/SEC1 family.
36329.O96245	PF3D7_0216600	N/A	kmeans	1	Red	363	MtN3-like protein; Belongs to the SWEET sugar transporter family.
36329.O96256	PF3D7_0217600	N/A	kmeans	1	Red	363	Uncharacterized protein
36329.O96266	PF3D7_0218600	N/A	kmeans	1	Red	363	Patatin-like phospholipase, putative
36329.O96287	PF3D7_0222100	MC-2TM	kmeans	1	Red	363	Pfmc-2TM Maurer's cleft two transmembrane protein
36329.O97228	PF3D7_0304000	IMC1a	kmeans	1	Red	363	Inner membrane complex protein 1a, putative
36329.O97234	PF3D7_0304800	N/A	kmeans	1	Red	363	Uncharacterized protein
36329.O97236	PF3D7_0305100	N/A	kmeans	1	Red	363	Uncharacterized protein
36329.O97237	PF3D7_0305200	N/A	kmeans	1	Red	363	GRIP and coiled-coil domain-containing protein PFC0235w
36329.O97238	PF3D7_0305300	N/A	kmeans	1	Red	363	Transporter, putative
36329.O97239	PF3D7_0305500	N/A	kmeans	1	Red	363	Protein dopey homolog PFC0245c; May be involved in protein traffic between late Golgi and early endosomes; Belongs to the dopey family.
36329.O97253	PF3D7_0307500	SKA2	kmeans	1	Red	363	Spindle and kinetochore-associated protein 2, putative
36329.O97260	PF3D7_0314700	RNF1	kmeans	1	Red	363	RING finger protein RNF1
36329.P50250	PF3D7_0520900	SAHH	kmeans	1	Red	363	Adenosylhomocysteinase; Adenosylhomocysteine is a competitive inhibitor of S- adenosyl-L-methionine-dependent methyl transferase reactions; therefore adenosylhomocysteinase may play a key role in the control of methylations via regulation of the intracellular concentration of adenosylhomocysteine.
36329.Q6ZLZ9	PF3D7_0903700	N/A	kmeans	1	Red	363	Tubulin alpha chain; Tubulin is the major constituent of microtubules. It binds two moles of GTP, one at an exchangeable site on the beta chain and one at a non-exchangeable site on the alpha chain.
36329.Q76NM4	PF3D7_1320600	RAB11a	kmeans	1	Red	363	Ras-related protein Rab-11A
36329.Q7K6A4	PF3D7_0922200	SAMS	kmeans	1	Red	363	S-adenosylmethionine synthase; Catalyzes the formation of S-adenosylmethionine from methionine and ATP.
36329.Q7K6B0	PF3D7_0807300	RAB18	kmeans	1	Red	363	Ras-related protein Rab-18
36329.Q7KQL5	PF3D7_1008700	N/A	kmeans	1	Red	363	Tubulin beta chain; Tubulin is the major constituent of microtubules. It binds two moles of GTP, one at an exchangeable site on the beta chain and one at a non-exchangeable site on the alpha chain.
36329.Q8I1Z8	PF3D7_0403200	N/A	kmeans	1	Red	363	Pre-mRNA splicing factor, putative
36329.Q8I202	PF3D7_0402400	GEXP18	kmeans	1	Red	363	Uncharacterized protein
36329.Q8I206	PF3D7_0402000	N/A	kmeans	1	Red	363	PRESAN domain-containing protein
36329.Q8I207	PF3D7_0401800	PfD80	kmeans	1	Red	363	PRESAN domain-containing protein
36329.Q8I218	PF3D7_0400400	VAR	kmeans	1	Red	363	Erythrocyte membrane protein 1, PfEMP1
36329.Q8I254	PF3D7_0108800	N/A	kmeans	1	Red	363	Mitochondrial carrier protein, putative; Belongs to the mitochondrial carrier (TC 2.A.29) family.
36329.Q8I255	PF3D7_0108700	PSOP24	kmeans	1	Red	363	Secreted ookinete protein, putative
36329.Q8I259	PF3D7_0108300	ARP	kmeans	1	Red	363	Uncharacterized protein
36329.Q8I266	PF3D7_0107500	NCR1	kmeans	1	Red	363	Niemann-Pick type C1-related protein
36329.Q8I2A8	PF3D7_0103200	NT4	kmeans	1	Red	363	Nucleoside transporter 4
36329.Q8I2I8	PF3D7_0932800	CSE1	kmeans	1	Red	363	Importin alpha re-exporter, putative
36329.Q8I2U9	PF3D7_0920400	N/A	kmeans	1	Red	363	Uncharacterized protein
36329.Q8I2W2	PF3D7_0919100	N/A	kmeans	1	Red	363	DnaJ protein, putative
36329.Q8I2W4	PF3D7_0918900	gammaGCS	kmeans	1	Red	363	Gamma-glutamylcysteine synthetase
36329.Q8I2W7	PF3D7_0918600	RECQ1	kmeans	1	Red	363	ATP-dependent DNA helicase Q1
36329.Q8I2Y3	PF3D7_0917000	MOP	kmeans	1	Red	363	Merozoite organizing protein
36329.Q8I305	PF3D7_0914700	MFR4	kmeans	1	Red	363	Major facilitator superfamily-related transporter, putative
36329.Q8I307	PF3D7_0914500	N/A	kmeans	1	Red	363	Uncharacterized protein
36329.Q8I312	PF3D7_0914000	N/A	kmeans	1	Red	363	Pseudouridylate synthase, putative
36329.Q8I316	PF3D7_0913600	N/A	kmeans	1	Red	363	Uncharacterized protein
36329.Q8I332	PF3D7_0912000	N/A	kmeans	1	Red	363	Uncharacterized protein
36329.Q8I338	PF3D7_0911400	N/A	kmeans	1	Red	363	Uncharacterized protein
36329.Q8I398	PF3D7_0905100	NUP221	kmeans	1	Red	363	Nucleoporin NUP221, putative
36329.Q8I399	PF3D7_0905000	ATPTG4	kmeans	1	Red	363	Uncharacterized protein
36329.Q8I3A3	PF3D7_0904600	N/A	kmeans	1	Red	363	Ubiquitin specific protease, putative; Belongs to the peptidase C19 family.
36329.Q8I3A8	PF3D7_0904100	N/A	kmeans	1	Red	363	AP-4 complex subunit epsilon, putative
36329.Q8I3F1	PF3D7_0532300	N/A	kmeans	1	Red	363	PRESAN domain-containing protein
36329.Q8I3H0	PF3D7_0529800	N/A	kmeans	1	Red	363	Uncharacterized protein
36329.Q8I3I6	PF3D7_0528100	N/A	kmeans	1	Red	363	AP complex subunit beta
36329.Q8I3M5	PF3D7_0524000	KASbeta	kmeans	1	Red	363	Karyopherin beta
36329.Q8I3S4	PF3D7_0518600	WDR26	kmeans	1	Red	363	WD repeat-containing protein 26, putative
36329.Q8I405	PF3D7_0509900	N/A	kmeans	1	Red	363	Nse4_C domain-containing protein
36329.Q8I409	PF3D7_0509500	N/A	kmeans	1	Red	363	ERCC4 domain-containing protein, putative
36329.Q8I418	PF3D7_0508500	ND6	kmeans	1	Red	363	Guanidine nucleotide exchange factor
36329.Q8I420	PF3D7_0508300	TPT	kmeans	1	Red	363	Triose phosphate transporter
36329.Q8I435	PF3D7_0506700	N/A	kmeans	1	Red	363	GTPase-activating protein, putative
36329.Q8I451	PF3D7_0505100	TRS85	kmeans	1	Red	363	Trafficking protein particle complex subunit 8, putative
36329.Q8I487	PF3D7_0501300	SBP1	kmeans	1	Red	363	Protein phosphatase; Belongs to the PP2C family.
36329.Q8I4S3	PF3D7_1251100	N/A	kmeans	1	Red	363	Uncharacterized protein
36329.Q8I4T2	PF3D7_1250200	N/A	kmeans	1	Red	363	CSC1-like protein, putative
36329.Q8I4U1	PF3D7_1249300	PPM4	kmeans	1	Red	363	Protein phosphatase PPM4, putative
36329.Q8I4V8	PF3D7_1247400	FKBP35	kmeans	1	Red	363	Peptidylprolyl isomerase
36329.Q8I4W9	PF3D7_1246300	KIC4	kmeans	1	Red	363	Clathrin adaptor domain-containing protein, putative
36329.Q8I4Z6	PF3D7_1243400	N/A	kmeans	1	Red	363	Uncharacterized protein
36329.Q8I506	PF3D7_1242300	N/A	kmeans	1	Red	363	Uncharacterized protein
36329.Q8I510	PF3D7_1241900	N/A	kmeans	1	Red	363	Tetratricopeptide repeat protein, putative
36329.Q8I517	PF3D7_1241200	N/A	kmeans	1	Red	363	Uncharacterized protein
36329.Q8I523	PF3D7_1240000	N/A	kmeans	1	Red	363	3-hydroxyisobutyryl-CoA hydrolase, mitochondrial; Hydrolyzes 3-hydroxyisobutyryl-CoA (HIBYL-CoA), a saline catabolite; Belongs to the enoyl-CoA hydratase/isomerase family.
36329.Q8I526	PF3D7_1239700	FTSH1	kmeans	1	Red	363	ATP-dependent zinc metalloprotease FTSH 1
36329.Q8I5A9	PF3D7_1231100	RAB2	kmeans	1	Red	363	Ras-related protein Rab-2
36329.Q8I5D0	PF3D7_1228800	N/A	kmeans	1	Red	363	WD repeat-containing protein, putative
36329.Q8I5D7	PF3D7_1228100	LRR13	kmeans	1	Red	363	Leucine-rich repeat protein
36329.Q8I5E4	PF3D7_1227400	N/A	kmeans	1	Red	363	Uncharacterized protein
36329.Q8I5E5	PF3D7_1227300	N/A	kmeans	1	Red	363	Uncharacterized protein
36329.Q8I5E6	PF3D7_1227200	K1	kmeans	1	Red	363	Potassium channel K1
36329.Q8I5E9	PF3D7_1226900	PV2	kmeans	1	Red	363	Parasitophorous vacuolar protein 2
36329.Q8I5F2	PF3D7_1226500	N/A	kmeans	1	Red	363	Heptatricopeptide repeat and RAP domain-containing protein, putative
36329.Q8I5J1	PF3D7_1222400	ApiAP2	kmeans	1	Red	363	AP2 domain transcription factor
36329.Q8I5J9	PF3D7_1221400	IMC1h	kmeans	1	Red	363	Inner membrane complex protein 1h, putative
36329.Q8I5K3	PF3D7_1221000	SET10	kmeans	1	Red	363	Histone-lysine N-methyltransferase, H3 lysine-4 specific
36329.Q8I5K8	PF3D7_1220500	TSR3	kmeans	1	Red	363	Probable ribosome biogenesis protein PF3D7_1220500; Probable pre-rRNA processing protein involved in ribosome biogenesis.
36329.Q8I5L0	PF3D7_1220300	N/A	kmeans	1	Red	363	Cell cycle associated protein, putative
36329.Q8I5L4	PF3D7_1219600	ATP2	kmeans	1	Red	363	Phospholipid-transporting ATPase; Belongs to the cation transport ATPase (P-type) (TC 3.A.3) family. Type IV subfamily.
36329.Q8I5L7	PF3D7_1219000	FRM2	kmeans	1	Red	363	Formin 2
36329.Q8I5M3	PF3D7_1218500	DRPC	kmeans	1	Red	363	Dynamin-like protein, putative
36329.Q8I5Z4	PF3D7_1205100	SEPSECS	kmeans	1	Red	363	O-phosphoseryl-tRNA(Sec) selenium transferase; Converts O-phosphoseryl-tRNA(Sec) to selenocysteinyl- tRNA(Sec) required for selenoprotein biosynthesis.
36329.Q8I605	PF3D7_1204100	N/A	kmeans	1	Red	363	Uncharacterized protein
36329.Q8I611	PF3D7_1203400	MFS4	kmeans	1	Red	363	Major facilitator superfamily domain-containing protein, putative
36329.Q8I612	PF3D7_1203300	N/A	kmeans	1	Red	363	TBCC domain-containing protein, putative
36329.Q8I634	PF3D7_1201100	N/A	kmeans	1	Red	363	RESA-like protein with PHIST and DnaJ domains
36329.Q8I638	PF3D7_1200700	ACS7	kmeans	1	Red	363	Acyl-CoA synthetase
36329.Q8I652	PF3D7_0221200	N/A	kmeans	1	Red	363	Uncharacterized protein
36329.Q8I657	PF3D7_0217700	N/A	kmeans	1	Red	363	E2F-associated phosphoprotein, putative
36329.Q8I665	PF3D7_0204200	SEC66	kmeans	1	Red	363	Uncharacterized protein
36329.Q8I669	PF3D7_0202200	PTP1	kmeans	1	Red	363	EMP1-trafficking protein
36329.Q8IAL6	PF3D7_0801800	N/A	kmeans	1	Red	363	Mannose-6-phosphate isomerase, putative
36329.Q8IAR7	PF3D7_0807900	TyrRS	kmeans	1	Red	363	Tyrosine--tRNA ligase; Belongs to the class-I aminoacyl-tRNA synthetase family.
36329.Q8IAZ2	PF3D7_0815500	N/A	kmeans	1	Red	363	Uncharacterized protein
36329.Q8IAZ5	PF3D7_0815800	VPS9	kmeans	1	Red	363	Vacuolar protein sorting-associated protein 9, putative
36329.Q8IB02	PF3D7_0816500	HSP20	kmeans	1	Red	363	Small heat shock protein HSP20, putative; Belongs to the small heat shock protein (HSP20) family.
36329.Q8IB08	PF3D7_0817200	N/A	kmeans	1	Red	363	Uncharacterized protein
36329.Q8IB31	PF3D7_0819600	N/A	kmeans	1	Red	363	Ubiquitin-like domain-containing protein
36329.Q8IB40	PF3D7_0820500	YIF1	kmeans	1	Red	363	Protein transport protein YIF1, putative
36329.Q8IB78	PF3D7_0824400	NT2	kmeans	1	Red	363	Nucleoside transporter 2
36329.Q8IBH2	PF3D7_0728600	N/A	kmeans	1	Red	363	RING zinc finger protein, putative
36329.Q8IBJ8	PF3D7_0725300	N/A	kmeans	1	Red	363	Uncharacterized protein
36329.Q8IBK0	PF3D7_0725100	N/A	kmeans	1	Red	363	Uncharacterized protein
36329.Q8IBK6	PF3D7_0724600	N/A	kmeans	1	Red	363	Protein kinase, putative
36329.Q8IBL9	PF3D7_0723400	N/A	kmeans	1	Red	363	Uncharacterized protein
36329.Q8IBN9	PF3D7_0721200	N/A	kmeans	1	Red	363	Uncharacterized protein
36329.Q8IBP0	PF3D7_0721100	N/A	kmeans	1	Red	363	Uncharacterized protein
36329.Q8IBP4	PF3D7_0720700	PX1	kmeans	1	Red	363	Phosphoinositide-binding protein, putative
36329.Q8IBQ3	PF3D7_0719900	N/A	kmeans	1	Red	363	Uncharacterized protein
36329.Q8IBS2	PF3D7_0717800	N/A	kmeans	1	Red	363	Uncharacterized protein
36329.Q8IBS3	PF3D7_0717700	N/A	kmeans	1	Red	363	Serine--tRNA ligase, putative
36329.Q8IBS6	PF3D7_0717400	N/A	kmeans	1	Red	363	Queuine tRNA-ribosyltransferase, putative
36329.Q8IBT7	PF3D7_0716300	N/A	kmeans	1	Red	363	Uncharacterized protein
36329.Q8IBV4	PF3D7_0714300	DHHC4	kmeans	1	Red	363	Palmitoyltransferase DHHC4, putative
36329.Q8IBW9	PF3D7_0712600	VAR	kmeans	1	Red	363	Erythrocyte membrane protein 1, PfEMP1
36329.Q8IBX2	PF3D7_0712000	VAR	kmeans	1	Red	363	Erythrocyte membrane protein 1, PfEMP1
36329.Q8IBY2	PF3D7_0710800	USE1	kmeans	1	Red	363	Protein transport protein USE1, putative
36329.Q8IBY8	PF3D7_0710200	N/A	kmeans	1	Red	363	Uncharacterized protein
36329.Q8IBZ1	PF3D7_0709900	N/A	kmeans	1	Red	363	Uncharacterized protein
36329.Q8IBZ5	PF3D7_0709400	N/A	kmeans	1	Red	363	Cg7 protein
36329.Q8IC14	PF3D7_0707500	N/A	kmeans	1	Red	363	Uncharacterized protein
36329.Q8IC42	PF3D7_0702500	N/A	kmeans	1	Red	363	Uncharacterized protein
36329.Q8ID31	PF3D7_1367700	AlaRS	kmeans	1	Red	363	Alanine--tRNA ligase; Catalyzes the attachment of alanine to tRNA(Ala) in a two- step reaction: alanine is first activated by ATP to form Ala-AMP and then transferred to the acceptor end of tRNA(Ala). Also edits incorrectly charged tRNA(Ala) via its editing domain. ; Belongs to the class-II aminoacyl-tRNA synthetase family.
36329.Q8IDG8	PF3D7_1353200	MAHRP2	kmeans	1	Red	363	Membrane associated histidine-rich protein 2
36329.Q8IDH2	PF3D7_1352800	MON1	kmeans	1	Red	363	Vacuolar fusion protein MON1, putative
36329.Q8IDK6	PF3D7_1349300	TKL3	kmeans	1	Red	363	Tyrosine kinase-like protein
36329.Q8IDM2	PF3D7_1347700	ECT	kmeans	1	Red	363	Ethanolamine-phosphate cytidylyltransferase
36329.Q8IDQ2	PF3D7_1343700	Kelch13	kmeans	1	Red	363	Kelch protein K13
36329.Q8IDQ9	PF3D7_1343000	PMT	kmeans	1	Red	363	Phosphoethanolamine N-methyltransferase
36329.Q8IDR5	PF3D7_1342400	CK2beta2	kmeans	1	Red	363	Casein kinase II subunit beta; Plays a complex role in regulating the basal catalytic activity of the alpha subunit; Belongs to the casein kinase 2 subunit beta family.
36329.Q8IDS1	PF3D7_1341800	IMC1k	kmeans	1	Red	363	Inner membrane complex protein 1k, putative
36329.Q8IDS7	PF3D7_1340900	PiT	kmeans	1	Red	363	Phosphate transporter; Sodium-phosphate symporter which plays a fundamental housekeeping role in phosphate transport. ; Belongs to the inorganic phosphate transporter (PiT) (TC 2.A.20) family.
36329.Q8IDW4	PF3D7_1336800	NUDC	kmeans	1	Red	363	Nuclear movement protein, putative
36329.Q8IDX2	PF3D7_1335800	N/A	kmeans	1	Red	363	Uncharacterized protein
36329.Q8IDZ9	PF3D7_1332900	cyto-IRS	kmeans	1	Red	363	Isoleucine--tRNA ligase, putative; Belongs to the class-I aminoacyl-tRNA synthetase family.
36329.Q8IE18	PF3D7_1330800	N/A	kmeans	1	Red	363	RNA-binding protein, putative
36329.Q8IE21	PF3D7_1330500	N/A	kmeans	1	Red	363	CTLH domain-containing protein, putative
36329.Q8IE38	PF3D7_1327600	NMNAT	kmeans	1	Red	363	Nicotinamide/nicotinic acid mononucleotide adenylyltransferase
36329.Q8IE50	PF3D7_1329100	MyoF	kmeans	1	Red	363	Myosin F, putative; Belongs to the TRAFAC class myosin-kinesin ATPase superfamily. Myosin family.
36329.Q8IE67	PF3D7_1325100	N/A	kmeans	1	Red	363	Phosphoribosylpyrophosphate synthetase
36329.Q8IE71	PF3D7_1324600	N/A	kmeans	1	Red	363	Uncharacterized protein
36329.Q8IE72	PF3D7_1324500	N/A	kmeans	1	Red	363	DEAD box helicase, putative
36329.Q8IE74	PF3D7_1324300	N/A	kmeans	1	Red	363	Uncharacterized protein
36329.Q8IE77	PF3D7_1324000	N/A	kmeans	1	Red	363	Uncharacterized protein
36329.Q8IEI2	PF3D7_1313100	N/A	kmeans	1	Red	363	Uncharacterized protein
36329.Q8IEI6	PF3D7_1302000	PTP6	kmeans	1	Red	363	EMP1-trafficking protein
36329.Q8IEJ0	PF3D7_1301700	CBP2	kmeans	1	Red	363	CX3CL1-binding protein 2
36329.Q8IEL8	PF3D7_1309700	VPS18	kmeans	1	Red	363	Vacuolar protein sorting-associated protein 18, putative
36329.Q8IES1	PF3D7_1304400	N/A	kmeans	1	Red	363	PUB domain-containing protein, putative
36329.Q8IES8	PF3D7_1303700	N/A	kmeans	1	Red	363	Tetratricopeptide repeat protein, putative
36329.Q8IET0	PF3D7_1303500	NHE	kmeans	1	Red	363	Sodium/hydrogen exchanger
36329.Q8IET1	PF3D7_1303400	LisH	kmeans	1	Red	363	LisH domain-containing protein, putative
36329.Q8IET9	PF3D7_1302500	N/A	kmeans	1	Red	363	Uncharacterized protein
36329.Q8IFM1	PF3D7_0424500	FIKK4.1	kmeans	1	Red	363	Serine/threonine protein kinase, FIKK family
36329.Q8IFP3	PF3D7_0422300	N/A	kmeans	1	Red	363	Tubulin alpha chain; Tubulin is the major constituent of microtubules. It binds two moles of GTP, one at an exchangeable site on the beta chain and one at a non-exchangeable site on the alpha chain.
36329.Q8IFP4	PF3D7_0422200	N/A	kmeans	1	Red	363	Erythrocyte membrane-associated antigen
36329.Q8IHN6	PF3D7_1148800	N/A	kmeans	1	Red	363	Uncharacterized protein
36329.Q8IHP7	PF3D7_1147300	N/A	kmeans	1	Red	363	Uncharacterized protein
36329.Q8IHQ6	PF3D7_1146200	N/A	kmeans	1	Red	363	Uncharacterized protein
36329.Q8IHW8	PF3D7_1139800	N/A	kmeans	1	Red	363	Uncharacterized protein
36329.Q8IHY0	PF3D7_1138500	PPM2	kmeans	1	Red	363	Protein phosphatase PPM2
36329.Q8IHZ8	PF3D7_1136600	N/A	kmeans	1	Red	363	Uncharacterized protein
36329.Q8II00	PF3D7_1136400	SRP72	kmeans	1	Red	363	Signal recognition particle subunit SRP72, putative
36329.Q8II04	PF3D7_1136000	N/A	kmeans	1	Red	363	Uncharacterized protein
36329.Q8II12	PF3D7_1135300	N/A	kmeans	1	Red	363	Uncharacterized protein
36329.Q8II13	PF3D7_1135100	PPM8	kmeans	1	Red	363	Protein phosphatase PPM8, putative
36329.Q8II18	PF3D7_1134600	N/A	kmeans	1	Red	363	Zinc finger protein, putative
36329.Q8II27	PF3D7_1133800	N/A	kmeans	1	Red	363	RNA (Uracil-5-)methyltransferase, putative; Belongs to the class I-like SAM-binding methyltransferase superfamily. RNA M5U methyltransferase family.
36329.Q8II32	PF3D7_1133200	N/A	kmeans	1	Red	363	Uncharacterized protein
36329.Q8II41	PF3D7_1132400	N/A	kmeans	1	Red	363	CRT-like domain-containing protein
36329.Q8II42	PF3D7_1132300	N/A	kmeans	1	Red	363	Nucleic acid binding protein, putative
36329.Q8II49	PF3D7_1131500	N/A	kmeans	1	Red	363	Uncharacterized protein
36329.Q8II63	PF3D7_1130000	PAGM	kmeans	1	Red	363	Phosphoacetylglucosamine mutase, putative
36329.Q8IIF6	PF3D7_1121100	N/A	kmeans	1	Red	363	Uncharacterized protein
36329.Q8IIF7	PF3D7_1121000	DHHC3	kmeans	1	Red	363	Palmitoyltransferase; Belongs to the DHHC palmitoyltransferase family.
36329.Q8IIG2	PF3D7_1120500	N/A	kmeans	1	Red	363	tRNA nucleotidyltransferase, putative; Belongs to the tRNA nucleotidyltransferase/poly(A) polymerase family.
36329.Q8IIN1	PF3D7_1113100	PRL	kmeans	1	Red	363	Protein tyrosine phosphatase
36329.Q8IIS1	PF3D7_1108100	N/A	kmeans	1	Red	363	Uncharacterized protein
36329.Q8IIS4	PF3D7_1107800	ApiAP2	kmeans	1	Red	363	AP2 domain transcription factor, putative
36329.Q8IIT1	PF3D7_1107200	N/A	kmeans	1	Red	363	Uncharacterized protein
36329.Q8IIT5	PF3D7_1106800	pTKL	kmeans	1	Red	363	Pseudo-tyrosine kinase-like protein
36329.Q8IIT6	PF3D7_1106700	DNA2	kmeans	1	Red	363	DNA replication ATP-dependent helicase/nuclease DNA2, putative
36329.Q8IIU5	PF3D7_1105800	N/A	kmeans	1	Red	363	Uncharacterized protein
36329.Q8IIV9	PF3D7_1104300	N/A	kmeans	1	Red	363	Uncharacterized protein
36329.Q8IIW1	PF3D7_1104100	SYN13	kmeans	1	Red	363	Syntaxin, Qa-SNARE family
36329.Q8IIW4	PF3D7_1103800	NOT1-G	kmeans	1	Red	363	CCR4-NOT transcription complex subunit 1, putative
36329.Q8IJ21	PF3D7_1039000	FIKK10.2	kmeans	1	Red	363	Serine/threonine protein kinase, FIKK family
36329.Q8IJA2	PF3D7_1030300	N/A	kmeans	1	Red	363	Uncharacterized protein
36329.Q8IJA4	PF3D7_1030100	PRP22	kmeans	1	Red	363	Pre-mRNA-splicing factor ATP-dependent RNA helicase PRP22, putative
36329.Q8IJB1	PF3D7_1029400	CDC50C	kmeans	1	Red	363	LEM3/CDC50 family protein, putative
36329.Q8IJB5	PF3D7_1028900	IMC1m	kmeans	1	Red	363	Inner membrane complex protein 1m, putative
36329.Q8IJB8	PF3D7_1028600	N/A	kmeans	1	Red	363	Uncharacterized protein
36329.Q8IJE8	PF3D7_1025500	N/A	kmeans	1	Red	363	Dynein_C domain-containing protein
36329.Q8IJG4	PF3D7_1024100	N/A	kmeans	1	Red	363	Uncharacterized protein
36329.Q8IJG7	PF3D7_1023800	N/A	kmeans	1	Red	363	Uncharacterized protein
36329.Q8IJG8	PF3D7_1023700	N/A	kmeans	1	Red	363	Uncharacterized protein
36329.Q8IJH5	PF3D7_1023000	N/A	kmeans	1	Red	363	Uncharacterized protein
36329.Q8IJI1	PF3D7_1022300	ZIPCO	kmeans	1	Red	363	ZIP domain-containing protein, putative
36329.Q8IJI3	PF3D7_1022000	N/A	kmeans	1	Red	363	RNA-binding protein, putative
36329.Q8IJI6	PF3D7_1021700	N/A	kmeans	1	Red	363	Chorein_N domain-containing protein
36329.Q8IJJ1	PF3D7_1021200	N/A	kmeans	1	Red	363	Uncharacterized protein
36329.Q8IJJ2	PF3D7_1021100	N/A	kmeans	1	Red	363	Uncharacterized protein
36329.Q8IJN9	PF3D7_1015600	HSP60	kmeans	1	Red	363	Heat shock protein 60; Belongs to the chaperonin (HSP60) family.
36329.Q8IJQ2	PF3D7_1014300	N/A	kmeans	1	Red	363	SPRY domain-containing protein, putative
36329.Q8IJS0	PF3D7_1012500	N/A	kmeans	1	Red	363	Phosphoglucomutase, putative; Belongs to the phosphohexose mutase family.
36329.Q8IJV9	PF3D7_1008500	N/A	kmeans	1	Red	363	Protein GPR89, putative
36329.Q8IJW2	PF3D7_1008100	PHD1	kmeans	1	Red	363	Zinc finger protein, putative
36329.Q8IJW3	PF3D7_1008000	HDA2	kmeans	1	Red	363	Histone deacetylase 2
36329.Q8IJX3	PF3D7_1006800	GBP2	kmeans	1	Red	363	Single-strand telomeric DNA-binding protein GBP2, putative
36329.Q8IJZ4	PF3D7_1004300	N/A	kmeans	1	Red	363	E3 ubiquitin-protein ligase, putative
36329.Q8IJZ5	PF3D7_1004200	N/A	kmeans	1	Red	363	WD repeat-containing protein, putative
36329.Q8IK00	PF3D7_1003700	N/A	kmeans	1	Red	363	MKT1 domain-containing protein, putative
36329.Q8IK03	PF3D7_1003400	N/A	kmeans	1	Red	363	Uncharacterized protein
36329.Q8IK07	PF3D7_1002900	N/A	kmeans	1	Red	363	Uncharacterized protein
36329.Q8IK16	PF3D7_1002000	N/A	kmeans	1	Red	363	Uncharacterized protein
36329.Q8IK49	PF3D7_1478600	PTP3	kmeans	1	Red	363	EMP1-trafficking protein
36329.Q8IK98	PF3D7_1474000	N/A	kmeans	1	Red	363	Uncharacterized protein
36329.Q8IKC8	PF3D7_1471100	EXP2	kmeans	1	Red	363	Exported protein 2
36329.Q8IKH4	PF3D7_1466200	HDP1	kmeans	1	Red	363	Early gametocyte enriched phosphoprotein EGXP
36329.Q8IKK1	PF3D7_1463500	N/A	kmeans	1	Red	363	Fam-a protein
36329.Q8IKK6	PF3D7_1462900	N/A	kmeans	1	Red	363	ATPase_AAA_core domain-containing protein
36329.Q8IKL0	PF3D7_1462400	N/A	kmeans	1	Red	363	Uncharacterized protein
36329.Q8IKL1	PF3D7_1462300	N/A	kmeans	1	Red	363	GTP-binding protein, putative
36329.Q8IKM1	PF3D7_1461100	N/A	kmeans	1	Red	363	Uncharacterized protein
36329.Q8IKP3	PF3D7_1458800	N/A	kmeans	1	Red	363	DNA-directed RNA polymerase III subunit RPC5, putative
36329.Q8IKP6	PF3D7_1458500	SAS4	kmeans	1	Red	363	Spindle assembly abnormal protein 4, putative
36329.Q8IKP8	PF3D7_1458300	N/A	kmeans	1	Red	363	Uncharacterized protein
36329.Q8IKQ1	PF3D7_1457900	N/A	kmeans	1	Red	363	Uncharacterized protein
36329.Q8IKQ5	PF3D7_1457500	VPS4	kmeans	1	Red	363	Vacuolar protein sorting-associated protein 4; Belongs to the AAA ATPase family.
36329.Q8IKQ6	PF3D7_1457400	N/A	kmeans	1	Red	363	Uncharacterized protein
36329.Q8IKQ9	PF3D7_1457000	SPP	kmeans	1	Red	363	Signal peptide peptidase
36329.Q8IKR0	PF3D7_1456900	N/A	kmeans	1	Red	363	Uncharacterized protein
36329.Q8IKT2	PF3D7_1454700	6PGD	kmeans	1	Red	363	6-phosphogluconate dehydrogenase, decarboxylating; Catalyzes the oxidative decarboxylation of 6-phosphogluconate to ribulose 5-phosphate and CO(2), with concomitant reduction of NADP to NADPH.
36329.Q8IKX5	PF3D7_1450000	N/A	kmeans	1	Red	363	Serine/threonine protein kinase, putative; Belongs to the protein kinase superfamily.
36329.Q8IKZ6	PF3D7_1447900	MDR2	kmeans	1	Red	363	Multidrug resistance protein 2
36329.Q8IKZ9	PF3D7_1447500	IMC20	kmeans	1	Red	363	Inner membrane complex protein, putative
36329.Q8IL08	PF3D7_1446500	NUP313	kmeans	1	Red	363	Nucleoporin NUP313, putative
36329.Q8IL15	PF3D7_1445800	N/A	kmeans	1	Red	363	Uncharacterized protein
36329.Q8IL17	PF3D7_1445600	N/A	kmeans	1	Red	363	RNA-binding protein, putative
36329.Q8IL19	PF3D7_1445400	CLK1	kmeans	1	Red	363	Protein serine/threonine kinase-1
36329.Q8IL40	PF3D7_1443100	N/A	kmeans	1	Red	363	Uncharacterized protein
36329.Q8IL44	PF3D7_1442700	N/A	kmeans	1	Red	363	Uncharacterized protein
36329.Q8IL47	PF3D7_1442400	KIC9	kmeans	1	Red	363	Uncharacterized protein
36329.Q8IL48	PF3D7_1442300	tRIP	kmeans	1	Red	363	tRNA import protein tRIP
36329.Q8IL54	PF3D7_1441600	N/A	kmeans	1	Red	363	Acid cluster protein 33 homologue, putative
36329.Q8IL55	PF3D7_1441500	N/A	kmeans	1	Red	363	Uncharacterized protein
36329.Q8IL57	PF3D7_1441300	N/A	kmeans	1	Red	363	Serine/threonine protein kinase, putative
36329.Q8IL62	PF3D7_1440800	MFS6	kmeans	1	Red	363	Major facilitator superfamily domain-containing protein, putative
36329.Q8ILA1	PF3D7_1436300	PTEX150	kmeans	1	Red	363	Translocon component PTEX150
36329.Q8ILC4	PF3D7_1433900	N/A	kmeans	1	Red	363	Protein kinase, putative
36329.Q8ILD0	PF3D7_1433300	RBAP46	kmeans	1	Red	363	Chromatin assembly factor 1 P55 subunit, putative
36329.Q8ILE0	PF3D7_1432300	N/A	kmeans	1	Red	363	Importin N-terminal domain-containing protein
36329.Q8ILF0	PF3D7_1431500	MAPK1	kmeans	1	Red	363	Mitogen-activated protein kinase; Belongs to the protein kinase superfamily. Ser/Thr protein kinase family. MAP kinase subfamily.
36329.Q8ILF7	PF3D7_1430700	GDH2	kmeans	1	Red	363	Glutamate dehydrogenase; Belongs to the Glu/Leu/Phe/Val dehydrogenases family.
36329.Q8ILG6	PF3D7_1429800	N/A	kmeans	1	Red	363	Coatomer subunit beta, putative
36329.Q8ILG8	PF3D7_1429600	GEXP03	kmeans	1	Red	363	Uncharacterized protein
36329.Q8ILH0	PF3D7_1429400	N/A	kmeans	1	Red	363	rRNA (Adenosine-2'-O-)-methyltransferase, putative
36329.Q8ILH2	PF3D7_1429200	ApiAP2	kmeans	1	Red	363	AP2 domain transcription factor AP2-O3, putative
36329.Q8ILH4	PF3D7_1429000	N/A	kmeans	1	Red	363	Protein archease, putative
36329.Q8ILH5	PF3D7_1428900	N/A	kmeans	1	Red	363	Uncharacterized protein
36329.Q8ILH9	PF3D7_1428500	N/A	kmeans	1	Red	363	Protein kinase, putative
36329.Q8ILI5	PF3D7_1428000	N/A	kmeans	1	Red	363	Uncharacterized protein
36329.Q8ILI9	PF3D7_1427500	MSH2-1	kmeans	1	Red	363	DNA mismatch repair protein MSH2, putative
36329.Q8ILJ6	PF3D7_1426800	N/A	kmeans	1	Red	363	Uncharacterized protein
36329.Q8ILL4	PF3D7_1423800	VPS3	kmeans	1	Red	363	Vacuolar protein sorting-associated protein 3, putative
36329.Q8ILT7	PF3D7_1415900	N/A	kmeans	1	Red	363	Zinc finger protein, putative
36329.Q8ILU2	PF3D7_1415400	N/A	kmeans	1	Red	363	Btz domain-containing protein
36329.Q8ILZ2	PF3D7_1410300	N/A	kmeans	1	Red	363	WD repeat-containing protein, putative
36329.Q8ILZ9	PF3D7_1409600	N/A	kmeans	1	Red	363	Uncharacterized protein
36329.Q8IM09	PF3D7_1408700	N/A	kmeans	1	Red	363	Uncharacterized protein
36329.Q8IM14	PF3D7_1408200	AP2-G2	kmeans	1	Red	363	AP2 domain transcription factor AP2-G2, putative
36329.Q8IM21	PF3D7_1407300	PRP38B	kmeans	1	Red	363	Pre-mRNA-splicing factor 38B, putative
36329.Q8IM22	PF3D7_1407200	N/A	kmeans	1	Red	363	Uncharacterized protein
36329.Q8IM24	PF3D7_1407000	CCp3	kmeans	1	Red	363	LCCL/lectin adhesive-like protein 1
36329.Q8IM33	PF3D7_1406100	N/A	kmeans	1	Red	363	Tubby domain-containing protein, putative; Belongs to the TUB family.
36329.Q8IM37	PF3D7_1405700	N/A	kmeans	1	Red	363	RING zinc finger protein, putative
36329.Q8IM76	PF3D7_1401200	N/A	kmeans	1	Red	363	Uncharacterized protein
36329.Q9U0H2	PF3D7_0411800	N/A	kmeans	1	Red	363	Uncharacterized protein
36329.Q9U0I0	PF3D7_0410800	N/A	kmeans	1	Red	363	Uncharacterized protein
36329.Q9U0I5	PF3D7_0410300	PPM1	kmeans	1	Red	363	Protein phosphatase PPM1, putative
36329.Q9U0I6	PF3D7_0410000	EVP1	kmeans	1	Red	363	Erythrocyte vesicle protein 1
36329.Q9U0K3	PF3D7_0408300	ZRANB2	kmeans	1	Red	363	Zinc finger Ran-binding domain-containing protein 2, putative
36329.Q9U0K5	PF3D7_0408100	N/A	kmeans	1	Red	363	Uncharacterized protein
36329.Q9U0L0	PF3D7_0407600	N/A	kmeans	1	Red	363	Uncharacterized protein
36329.Q9U0L3	PF3D7_0407300	N/A	kmeans	1	Red	363	Transcription factor, putative
36329.Q9U0N1	PF3D7_0113000	GARP	kmeans	1	Red	363	Glutamic acid-rich protein GARP
36329.Q9Y011	PF3D7_0314600	N/A	kmeans	1	Red	363	Uncharacterized protein
36329.Q03400	PF3D7_1035200	N/A	kmeans	1	Red	363	S-antigen protein; S antigens are soluble heat-stable proteins present in the sera of some infected individuals.
36329.Q8IKV8	PF3D7_1451800	SORTLR	kmeans	1	Red	363	Sortilin
36329.C6KT50	PF3D7_0621200	PDX1	kmeans	1	Red	363	Pyridoxal 5'-phosphate synthase subunit Pdx1; Catalyzes the formation of pyridoxal 5'-phosphate from ribose 5-phosphate (RBP), glyceraldehyde 3-phosphate (G3P) and ammonia. The ammonia is provided by Pdx2. Can also use ribulose 5-phosphate and dihydroxyacetone phosphate as substrates, resulting from enzyme- catalyzed isomerization of RBP and G3P, respectively. ; Belongs to the PdxS/SNZ family.
36329.A0A144A0U1	PF3D7_1249600	LRR12	kmeans	2	Yellow	263	Leucine-rich repeat protein
36329.A0A144A1B4	PF3D7_1202300	N/A	kmeans	2	Yellow	263	Dynein heavy chain, putative
36329.A0A144A1E4	PF3D7_1414500	ABCk2	kmeans	2	Yellow	263	Atypical protein kinase, ABC-1 family, putative
36329.A0A144A2H0	PF3D7_1454400	APP	kmeans	2	Yellow	263	Aminopeptidase P; Belongs to the peptidase M24B family.
36329.A0A144A4T0	PF3D7_1472200	HDA1	kmeans	2	Yellow	263	Histone deacetylase, putative
36329.A0A5K1K847	PF3D7_1326500	N/A	kmeans	2	Yellow	263	Uncharacterized protein
36329.A0A5K1K859	PF3D7_1328500	N/A	kmeans	2	Yellow	263	Alpha/beta-hydrolase, putative
36329.A0A5K1K8E0	PF3D7_1327300	N/A	kmeans	2	Yellow	263	Uncharacterized protein
36329.A0A5K1K8G1	PF3D7_1333100	N/A	kmeans	2	Yellow	263	Uncharacterized protein
36329.A0A5K1K8H4	PF3D7_1352000	N/A	kmeans	2	Yellow	263	GTP-binding protein, putative
36329.A0A5K1K8H7	PF3D7_0512600	RAB1b	kmeans	2	Yellow	263	Ras-related protein Rab-1B
36329.A0A5K1K8J0	PF3D7_1340600	DBR1	kmeans	2	Yellow	263	RNA lariat debranching enzyme, putative
36329.A0A5K1K8J1	PF3D7_1329500	N/A	kmeans	2	Yellow	263	Uncharacterized protein
36329.A0A5K1K8R9	PF3D7_1322300	N/A	kmeans	2	Yellow	263	BRCT domain-containing protein
36329.A0A5K1K8S0	PF3D7_0828000	ROM3	kmeans	2	Yellow	263	RHOMBOID-like protein
36329.A0A5K1K8W3	PF3D7_1341500	ISC1	kmeans	2	Yellow	263	Inner membrane complex suture component, putative
36329.A0A5K1K8X2	PF3D7_1332400	N/A	kmeans	2	Yellow	263	Nucleotidyltransferase, putative
36329.A0A5K1K8Y8	PF3D7_1347500	ALBA4	kmeans	2	Yellow	263	DNA/RNA-binding protein Alba 4
36329.A0A5K1K907	PF3D7_1352400	N/A	kmeans	2	Yellow	263	Uncharacterized protein
36329.A0A5K1K916	PF3D7_1359900	N/A	kmeans	2	Yellow	263	Uncharacterized protein
36329.A0A5K1K933	PF3D7_1366300	N/A	kmeans	2	Yellow	263	Uncharacterized protein
36329.A0A5K1K956	PF3D7_0811500	CARM1	kmeans	2	Yellow	263	Histone-arginine methyltransferase CARM1, putative
36329.A0A5K1K963	PF3D7_1334200	N/A	kmeans	2	Yellow	263	Chaperone binding protein, putative
36329.A0A5K1K969	PF3D7_1339700	N/A	kmeans	2	Yellow	263	Uncharacterized protein
36329.A0A5K1K973	PF3D7_1322600	N/A	kmeans	2	Yellow	263	Uncharacterized protein
36329.A0A5K1K9E8	PF3D7_1322200	N/A	kmeans	2	Yellow	263	Uncharacterized protein
36329.A0A5K1K9F0	PF3D7_1327500	N/A	kmeans	2	Yellow	263	Uncharacterized protein
36329.C0H469	PF3D7_0310300	N/A	kmeans	2	Yellow	263	Phosphoglycerate mutase, putative
36329.C0H479	PF3D7_0317900	N/A	kmeans	2	Yellow	263	Uncharacterized protein
36329.C0H493	PF3D7_0406900	N/A	kmeans	2	Yellow	263	Uncharacterized protein
36329.C0H4A7	PF3D7_0416400	HAT1	kmeans	2	Yellow	263	Histone acetyltransferase, putative
36329.C0H4K3	PF3D7_0704000	N/A	kmeans	2	Yellow	263	Uncharacterized protein
36329.C0H4M3	PF3D7_0709600	POP1	kmeans	2	Yellow	263	Ribonucleases P/MRP protein subunit POP1, putative
36329.C0H4M6	PF3D7_0711500	N/A	kmeans	2	Yellow	263	Regulator of chromosome condensation, putative
36329.C0H4N1	PF3D7_0717100	N/A	kmeans	2	Yellow	263	Uncharacterized protein
36329.C0H4P1	PF3D7_0724000	N/A	kmeans	2	Yellow	263	Rab GTPase activator and protein kinase, putative
36329.C0H4P2	PF3D7_0724700	BDP6	kmeans	2	Yellow	263	Uncharacterized protein
36329.C0H4P4	PF3D7_0726400	N/A	kmeans	2	Yellow	263	Uncharacterized protein
36329.C0H4V8	PF3D7_0818700	N/A	kmeans	2	Yellow	263	DNA helicase, putative
36329.C0H4W3	PF3D7_0820000	SRCAP	kmeans	2	Yellow	263	Probable ATP-dependent helicase PF08_0048; Catalytic component of a chromatin remodeling complex. ; Belongs to the SNF2/RAD54 helicase family. SWR1 subfamily.
36329.C0H4X2	PF3D7_0823100	N/A	kmeans	2	Yellow	263	RWD domain-containing protein, putative
36329.C0H4X4	PF3D7_0824200	N/A	kmeans	2	Yellow	263	Uncharacterized protein
36329.C0H553	PF3D7_0923200	NOS	kmeans	2	Yellow	263	Nitric oxide synthase, putative
36329.C0H557	PF3D7_0924500	N/A	kmeans	2	Yellow	263	Uncharacterized protein
36329.C0H564	PF3D7_0926400	N/A	kmeans	2	Yellow	263	Monocarboxylate transporter, putative
36329.C0H569	PF3D7_0928300	N/A	kmeans	2	Yellow	263	Uncharacterized protein
36329.C0H583	PF3D7_0932000	N/A	kmeans	2	Yellow	263	Uncharacterized protein
36329.C0H5C0	PF3D7_1316900	N/A	kmeans	2	Yellow	263	Uncharacterized protein
36329.C0H5K3	PF3D7_1362800	N/A	kmeans	2	Yellow	263	Uncharacterized protein
36329.C0H5L4	PF3D7_1369000	GPAA1	kmeans	2	Yellow	263	Glycosylphosphatidylinositol anchor attachment 1 protein, putative
36329.C0H5N0	PF3D7_1372400	ACS4	kmeans	2	Yellow	263	Acyl-CoA synthetase
36329.C6KSK8	PF3D7_0600200	VAR	kmeans	2	Yellow	263	Erythrocyte membrane protein 1, PfEMP1
36329.C6KSL7	PF3D7_0601500	N/A	kmeans	2	Yellow	263	PRESAN domain-containing protein
36329.C6KSL8	PF3D7_0601600	N/A	kmeans	2	Yellow	263	Tetratricopeptide repeat protein, putative
36329.C6KSM0	PF3D7_0602000	N/A	kmeans	2	Yellow	263	Zinc finger protein, putative
36329.C6KSQ6	PF3D7_0605800	RAD50	kmeans	2	Yellow	263	Probable DNA repair protein RAD50; Essential component of the MRN complex, a complex that possesses single-stranded DNA endonuclease and 3' to 5' exonuclease activities, and plays a central role in double-strand break (DSB) repair, chromosome morphogenesis, DNA repair and meiosis. In the complex, it mediates the ATP-binding and is probably required to bind DNA ends and hold them in close proximit…
36329.C6KST7	PF3D7_0609000	NUP637	kmeans	2	Yellow	263	Nucleoporin NUP637, putative
36329.C6KST8	PF3D7_0609100	ZIP1	kmeans	2	Yellow	263	Zinc transporter ZIP1, putative
36329.C6KSU0	PF3D7_0609300	N/A	kmeans	2	Yellow	263	Uncharacterized protein
36329.C6KSV9	PF3D7_0611400	SWIB	kmeans	2	Yellow	263	SWIB/MDM2 domain-containing protein
36329.C6KSY1	PF3D7_0613900	MyoE	kmeans	2	Yellow	263	Myosin E, putative; Belongs to the TRAFAC class myosin-kinesin ATPase superfamily. Myosin family.
36329.C6KSZ0	PF3D7_0614900	N/A	kmeans	2	Yellow	263	Uncharacterized protein
36329.C6KSZ5	PF3D7_0615400	N/A	kmeans	2	Yellow	263	Ribonuclease, putative
36329.C6KT04	PF3D7_0616300	N/A	kmeans	2	Yellow	263	Uncharacterized protein
36329.C6KT07	PF3D7_0616600	N/A	kmeans	2	Yellow	263	Uncharacterized protein
36329.C6KT12	PF3D7_0617100	N/A	kmeans	2	Yellow	263	AP-2 complex subunit alpha, putative
36329.C6KT18	PF3D7_0617800	H2A	kmeans	2	Yellow	263	Histone H2A; Belongs to the histone H2A family.
36329.C6KT19	PF3D7_0617900	H3.3	kmeans	2	Yellow	263	Histone H3; Belongs to the histone H3 family.
36329.C6KT74	PF3D7_0623800	TKL4	kmeans	2	Yellow	263	Tyrosine kinase-like protein, putative
36329.C6KT82	PF3D7_0624600	ISWI	kmeans	2	Yellow	263	SNF2 helicase, putative
36329.C6KTB7	PF3D7_0628100	HECT1	kmeans	2	Yellow	263	Putative E3 ubiquitin-protein ligase protein PFF1365c; Putative E3 ubiquitin-protein ligase.
36329.C6S3F2	PF3D7_1116100	N/A	kmeans	2	Yellow	263	Serine esterase, putative
36329.C6S3G5	PF3D7_1145300	CRIPT	kmeans	2	Yellow	263	Cysteine-rich PDZ-binding protein, putative
36329.C6S3H2	PF3D7_1403100	CAPD2	kmeans	2	Yellow	263	Condensin complex subunit 1, putative
36329.C6S3I0	PF3D7_1422300	N/A	kmeans	2	Yellow	263	DnaJ protein, putative
36329.Q76NL8	PF3D7_1360800	FLN	kmeans	2	Yellow	263	Falcilysin
36329.Q8I6U8	PF3D7_1016300	GBP130	kmeans	2	Yellow	263	Glycophorin-binding protein; Involved in erythrocyte invasion.
36329.Q8III5	PF3D7_1118300	N/A	kmeans	2	Yellow	263	Insulinase, putative
36329.Q8I4Y0	PF3D7_1245100	KLP8	kmeans	2	Yellow	263	Kinesin-13, putative; Belongs to the TRAFAC class myosin-kinesin ATPase superfamily. Kinesin family.
36329.O77382	PF3D7_0317500	EG5	kmeans	2	Yellow	263	Kinesin-5; Belongs to the TRAFAC class myosin-kinesin ATPase superfamily. Kinesin family.
36329.O77308	PF3D7_0302600	ABCB4	kmeans	2	Yellow	263	ABC transporter B family member 4, putative
36329.O77329	PF3D7_0309300	N/A	kmeans	2	Yellow	263	N2227-like protein, putative
36329.O77334	PF3D7_0309000	YVH1	kmeans	2	Yellow	263	Dual specificity protein phosphatase
36329.O77347	PF3D7_0312100	N/A	kmeans	2	Yellow	263	E3 ubiquitin-protein ligase
36329.O77387	PF3D7_0316900	N/A	kmeans	2	Yellow	263	E3 ubiquitin-protein ligase, putative
36329.O77393	PF3D7_0316200	N/A	kmeans	2	Yellow	263	Uncharacterized protein
36329.O96198	PF3D7_0211800	AsnRS	kmeans	2	Yellow	263	Asparagine--tRNA ligase
36329.O96201	PF3D7_0212100	N/A	kmeans	2	Yellow	263	Uncharacterized protein
36329.O96204	PF3D7_0212400	N/A	kmeans	2	Yellow	263	Uncharacterized protein
36329.O96205	PF3D7_0212500	N/A	kmeans	2	Yellow	263	Uncharacterized protein
36329.O96210	PF3D7_0212900	ATEL1	kmeans	2	Yellow	263	Arginyl-tRNA--protein transferase
36329.O97273	PF3D7_0315800	N/A	kmeans	2	Yellow	263	Zinc finger protein, putative
36329.O97289	PF3D7_0321500	N/A	kmeans	2	Yellow	263	Peptidase, putative
36329.Q8ILP3	PF3D7_1420700	P113	kmeans	2	Yellow	263	Surface protein P113; Membrane receptor which tethers secreted RH5 to the merozoite membrane during merozoite invasion of host erythocytes.
36329.Q76NM5	PF3D7_1301600	EBA140	kmeans	2	Yellow	263	Erythrocyte binding antigen-140
36329.Q76NN8	PF3D7_0106300	ATP6	kmeans	2	Yellow	263	Calcium-transporting ATPase; Belongs to the cation transport ATPase (P-type) (TC 3.A.3) family.
36329.Q7K6B1	PF3D7_0817500	HINT1	kmeans	2	Yellow	263	Histidine triad nucleotide-binding protein 1
36329.Q7KQK4	PF3D7_1209300	TRZ	kmeans	2	Yellow	263	Telomere repeat-binding zinc finger protein
36329.Q7KQK7	PF3D7_1113900	MAPK2	kmeans	2	Yellow	263	Mitogen-activated protein kinase
36329.Q7KQL4	PF3D7_1017000	N/A	kmeans	2	Yellow	263	DNA polymerase
36329.Q7KQM4	PF3D7_1407900	PMI	kmeans	2	Yellow	263	Plasmepsin-1; Participates in the digestion of the host hemoglobin. Initial cleavage at the hinge region of hemoglobin, than cleaves at other sites, leading to denaturation of the molecule and to further degradation (By similarity); Belongs to the peptidase A1 family.
36329.Q7KWJ5	PF3D7_0204700	HT1	kmeans	2	Yellow	263	Hexose transporter; Belongs to the major facilitator superfamily. Sugar transporter (TC 2.A.1.1) family.
36329.Q8I1N6	PF3D7_0420300	ApiAP2	kmeans	2	Yellow	263	AP2/ERF domain-containing protein PFD0985w
36329.Q8I1N9	PF3D7_0420000	N/A	kmeans	2	Yellow	263	Zinc finger protein, putative
36329.Q8I1P2	PF3D7_0419500	N/A	kmeans	2	Yellow	263	Uncharacterized protein
36329.Q8I1U8	PF3D7_0413900	USP13	kmeans	2	Yellow	263	Ubiquitin carboxyl-terminal hydrolase
36329.Q8I289	PF3D7_0105200	N/A	kmeans	2	Yellow	263	Heptatricopeptide repeat and RAP domain-containing protein, putative
36329.Q8I291	PF3D7_0104800	NPT1	kmeans	2	Yellow	263	Novel putative transporter 1, putative
36329.Q8I296	PF3D7_0104300	UBP1	kmeans	2	Yellow	263	Ubiquitin carboxyl-terminal hydrolase 1, putative; Belongs to the peptidase C19 family.
36329.Q8I299	PF3D7_0104100	N/A	kmeans	2	Yellow	263	Uncharacterized protein
36329.Q8I2A1	PF3D7_0103900	PIESP15	kmeans	2	Yellow	263	Parasite-infected erythrocyte surface protein
36329.Q8I2A6	PF3D7_0103400	N/A	kmeans	2	Yellow	263	Putative zinc carboxypeptidase PFA0170c; Belongs to the peptidase M14 family.
36329.Q8I2B4	PF3D7_0102500	EBA181	kmeans	2	Yellow	263	Erythrocyte binding antigen-181
36329.Q8I2D9	PF3D7_0113900	CBP1	kmeans	2	Yellow	263	CX3CL1-binding protein 1
36329.Q8I2I3	PF3D7_0933500	N/A	kmeans	2	Yellow	263	Gamma-tubulin complex component, putative
36329.Q8I2J3	PF3D7_0932300	M18AAP	kmeans	2	Yellow	263	M18 aspartyl aminopeptidase; Belongs to the peptidase M18 family.
36329.Q8I2N2	PF3D7_0927700	PPP4	kmeans	2	Yellow	263	Serine/threonine-protein phosphatase
36329.Q8I2T4	PF3D7_0921900	N/A	kmeans	2	Yellow	263	Uncharacterized protein
36329.Q8I2U6	PF3D7_0920700	N/A	kmeans	2	Yellow	263	CRAL/TRIO domain-containing protein, putative
36329.Q8I341	PF3D7_0911100	N/A	kmeans	2	Yellow	263	Uncharacterized protein
36329.Q8I349	PF3D7_0910300	N/A	kmeans	2	Yellow	263	Uncharacterized protein
36329.Q8I350	PF3D7_0910200	N/A	kmeans	2	Yellow	263	Uncharacterized protein
36329.Q8I355	PF3D7_0909700	N/A	kmeans	2	Yellow	263	FHA domain protein, putative
36329.Q8I3A0	PF3D7_0904900	CuTP	kmeans	2	Yellow	263	Copper-transporting ATPase
36329.Q8I3L4	PF3D7_0525100	ACS10	kmeans	2	Yellow	263	Acyl-CoA synthetase
36329.Q8I3M7	PF3D7_0523800	N/A	kmeans	2	Yellow	263	Divalent metal transporter, putative
36329.Q8I3N0	PF3D7_0523400	N/A	kmeans	2	Yellow	263	DnaJ protein, putative
36329.Q8I3P2	PF3D7_0522100	N/A	kmeans	2	Yellow	263	Uncharacterized protein
36329.Q8I3P6	PF3D7_0521700	DDX1	kmeans	2	Yellow	263	ATP-dependent RNA helicase DDX1, putative
36329.Q8I3R4	PF3D7_0519600	N/A	kmeans	2	Yellow	263	Zinc finger protein, putative
36329.Q8I3R5	PF3D7_0519500	CCR4-1	kmeans	2	Yellow	263	CCR4 domain-containing protein 1, putative
36329.Q8I3S0	PF3D7_0518900	N/A	kmeans	2	Yellow	263	Uncharacterized protein
36329.Q8I3U1	PF3D7_0516700	N/A	kmeans	2	Yellow	263	Ubiquitin carboxyl-terminal hydrolase 2, putative; Belongs to the peptidase C19 family.
36329.Q8I3V8	PF3D7_0515000	CWC2	kmeans	2	Yellow	263	Pre-mRNA-splicing factor CWC2, putative
36329.Q8I413	PF3D7_0509100	SMC4	kmeans	2	Yellow	263	Structural maintenance of chromosomes protein 4, putative
36329.Q8I445	PF3D7_0505700	N/A	kmeans	2	Yellow	263	Uncharacterized protein
36329.Q8I461	PF3D7_0504000	ATPase3	kmeans	2	Yellow	263	Cation transporting P-ATPase
36329.Q8I465	PF3D7_0503600	MyoB	kmeans	2	Yellow	263	Myosin B; Belongs to the TRAFAC class myosin-kinesin ATPase superfamily. Myosin family.
36329.Q8I503	PF3D7_1242600	N/A	kmeans	2	Yellow	263	Protein farnesyltransferase subunit alpha
36329.Q8I533	PF3D7_1239000	N/A	kmeans	2	Yellow	263	HD superfamily phosphohydrolase protein, putative
36329.Q8I534	PF3D7_1238900	PK2	kmeans	2	Yellow	263	Protein kinase 2
36329.Q8I535	PF3D7_1238800	ACS11	kmeans	2	Yellow	263	Acyl-CoA synthetase
36329.Q8I538	PF3D7_1238500	N/A	kmeans	2	Yellow	263	Uncharacterized protein
36329.Q8I548	PF3D7_1237500	N/A	kmeans	2	Yellow	263	Uncharacterized protein
36329.Q8I551	PF3D7_1237200	N/A	kmeans	2	Yellow	263	Uncharacterized protein
36329.Q8I555	PF3D7_1236800	ICMT	kmeans	2	Yellow	263	Protein-S-isoprenylcysteine O-methyltransferase
36329.Q8I5F7	PF3D7_1226000	N/A	kmeans	2	Yellow	263	Uncharacterized protein
36329.Q8I5H0	PF3D7_1224700	N/A	kmeans	2	Yellow	263	Uncharacterized protein
36329.Q8I5H2	PF3D7_1224500	ASF1	kmeans	2	Yellow	263	Histone chaperone ASF1, putative
36329.Q8I5H5	PF3D7_1224200	N/A	kmeans	2	Yellow	263	BRO1 domain-containing protein, putative
36329.Q8I5M9	PF3D7_1217900	N/A	kmeans	2	Yellow	263	PPPDE peptidase domain-containing protein, putative
36329.Q8I5P3	PF3D7_1216400	N/A	kmeans	2	Yellow	263	Uncharacterized protein
36329.Q8I5Q7	PF3D7_1214900	N/A	kmeans	2	Yellow	263	Uncharacterized protein
36329.Q8I5S8	PF3D7_1212400	N/A	kmeans	2	Yellow	263	Tetratricopeptide repeat protein, putative
36329.Q8I5T8	PF3D7_1211200	N/A	kmeans	2	Yellow	263	Uncharacterized protein
36329.Q8I5W0	PF3D7_1208800	N/A	kmeans	2	Yellow	263	Zinc finger protein, putative
36329.Q8I5W4	PF3D7_1208400	N/A	kmeans	2	Yellow	263	Amino acid transporter, putative
36329.Q8I608	PF3D7_1203700	NAPL	kmeans	2	Yellow	263	Nucleosome assembly protein; Belongs to the nucleosome assembly protein (NAP) family.
36329.Q8I6V0	PF3D7_1458000	FP1	kmeans	2	Yellow	263	Cysteine proteinase falcipain 1; Belongs to the peptidase C1 family.
36329.Q8IAT4	PF3D7_0809900	JmjC1	kmeans	2	Yellow	263	JmjC domain-containing protein, putative
36329.Q8IB47	PF3D7_0821300	DHX36	kmeans	2	Yellow	263	ATP-dependent RNA helicase DHX36, putative
36329.Q8IB72	PF3D7_0823800	N/A	kmeans	2	Yellow	263	DnaJ protein, putative
36329.Q8IB82	PF3D7_0824800	N/A	kmeans	2	Yellow	263	Uncharacterized protein
36329.Q8IB83	PF3D7_0824900	N/A	kmeans	2	Yellow	263	Uncharacterized protein
36329.Q8IB87	PF3D7_0825300	N/A	kmeans	2	Yellow	263	SAYSvFN domain-containing protein, putative
36329.Q8IB99	PF3D7_0826600	VAMP7	kmeans	2	Yellow	263	SNARE protein, putative
36329.Q8IBA5	PF3D7_0827300	N/A	kmeans	2	Yellow	263	Uncharacterized protein
36329.Q8IBJ1	PF3D7_0726500	N/A	kmeans	2	Yellow	263	Ubiquitin carboxyl-terminal hydrolase, putative; Belongs to the peptidase C19 family.
36329.Q8IBJ3	PF3D7_0726300	PMS1	kmeans	2	Yellow	263	DNA mismatch repair protein PMS1, putative
36329.Q8IBR9	PF3D7_0718100	EST	kmeans	2	Yellow	263	Exported serine/threonine protein kinase
36329.Q8IBU1	PF3D7_0715900	CDF	kmeans	2	Yellow	263	Cation diffusion facilitator family protein, putative
36329.Q8IC23	PF3D7_0704700	PPAT	kmeans	2	Yellow	263	Phosphopantetheine adenylyltransferase, putative
36329.Q8IC26	PF3D7_0704400	N/A	kmeans	2	Yellow	263	Phosphoinositide-binding protein, putative
36329.Q8IC35	PF3D7_0703500	N/A	kmeans	2	Yellow	263	Erythrocyte membrane-associated antigen
36329.Q8IC38	PF3D7_0703200	N/A	kmeans	2	Yellow	263	Uncharacterized protein
36329.Q8ID34	PF3D7_1367400	N/A	kmeans	2	Yellow	263	Uncharacterized protein
36329.Q8ID41	PF3D7_1366700	N/A	kmeans	2	Yellow	263	Uncharacterized protein
36329.Q8ID52	PF3D7_1365700	N/A	kmeans	2	Yellow	263	SNARE associated Golgi protein, putative
36329.Q8ID92	PF3D7_1361400	ADF2	kmeans	2	Yellow	263	Cofilin/actin-depolymerizing factor homolog 2; Not involved in actin polymerisation, instead functions to stimulate nucleotide exchange on monomeric actin and influence turnover of the small amount of cytosolic actin microfilaments. Essential for erythrocytic schizogony (By similarity).
36329.Q8IDX3	PF3D7_1335700	COG3	kmeans	2	Yellow	263	Conserved oligomeric Golgi complex subunit 3, putative
36329.Q8IDY3	PF3D7_1334500	MSRP6	kmeans	2	Yellow	263	MSP7-like protein
36329.Q8IDY5	PF3D7_1334300	MSRP5	kmeans	2	Yellow	263	MSP7-like protein
36329.Q8IE02	PF3D7_1332600	APN1	kmeans	2	Yellow	263	DNA-(Apurinic or apyrimidinic site) lyase 1, putative
36329.Q8IEA1	PF3D7_1321300	N/A	kmeans	2	Yellow	263	Uncharacterized protein
36329.Q8IEA2	PF3D7_1321200	N/A	kmeans	2	Yellow	263	Uncharacterized protein
36329.Q8IEB7	PF3D7_1319900	N/A	kmeans	2	Yellow	263	Uncharacterized protein
36329.Q8IED3	PF3D7_1318300	N/A	kmeans	2	Yellow	263	Uncharacterized protein
36329.Q8IED6	PF3D7_1318000	N/A	kmeans	2	Yellow	263	Uncharacterized protein
36329.Q8IEF3	PF3D7_1316100	IPK2	kmeans	2	Yellow	263	Kinase; Belongs to the inositol phosphokinase (IPK) family.
36329.Q8IEM5	PF3D7_1308900	DCP2	kmeans	2	Yellow	263	mRNA-decapping enzyme 2, putative
36329.Q8IEP0	PF3D7_1307500	N/A	kmeans	2	Yellow	263	Uncharacterized protein
36329.Q8IES7	PF3D7_1303800	N/A	kmeans	2	Yellow	263	Uncharacterized protein
36329.Q8IHP6	PF3D7_1147500	FTB	kmeans	2	Yellow	263	Protein farnesyltransferase subunit beta
36329.Q8IHR7	PF3D7_1145000	N/A	kmeans	2	Yellow	263	Uncharacterized protein
36329.Q8IHS1	PF3D7_1144600	TFG2	kmeans	2	Yellow	263	Transcription initiation factor IIF subunit beta, putative
36329.Q8IHT4	PF3D7_1143200	N/A	kmeans	2	Yellow	263	DnaJ protein, putative
36329.Q8IHU2	PF3D7_1142300	N/A	kmeans	2	Yellow	263	Uncharacterized protein
36329.Q8IHZ5	PF3D7_1136900	SUB2	kmeans	2	Yellow	263	Subtilisin-like protease 2
36329.Q8II64	PF3D7_1129900	MFR5	kmeans	2	Yellow	263	Major facilitator superfamily-related transporter, putative
36329.Q8II85	PF3D7_1127800	N/A	kmeans	2	Yellow	263	TFIIS central domain-containing protein, putative
36329.Q8II87	PF3D7_1127600	N/A	kmeans	2	Yellow	263	CRAL/TRIO domain-containing protein, putative
36329.Q8II93	PF3D7_1127000	N/A	kmeans	2	Yellow	263	Protein phosphatase, putative
36329.Q8II99	PF3D7_1126500	N/A	kmeans	2	Yellow	263	WD repeat-containing protein, putative
36329.Q8IIA6	PF3D7_1125800	N/A	kmeans	2	Yellow	263	Kelch domain-containing protein, putative
36329.Q8IIC8	PF3D7_1123500	GP2	kmeans	2	Yellow	263	Golgi protein 2
36329.Q8IIG8	PF3D7_1119900	SEC16	kmeans	2	Yellow	263	Protein transport protein SEC16, putative
36329.Q8IIG9	PF3D7_1119800	ASF1	kmeans	2	Yellow	263	Alternative splicing factor ASF-1, putative
36329.Q8III9	PF3D7_1117900	N/A	kmeans	2	Yellow	263	Uncharacterized protein
36329.Q8IIJ9	PF3D7_1116700	DPAP1	kmeans	2	Yellow	263	Probable cathepsin C; Thiol protease. Has a role as a digestive enzyme.
36329.Q8IIW0	PF3D7_1104200	SNF2L	kmeans	2	Yellow	263	Chromatin remodeling protein
36329.Q8IIY1	PF3D7_1101700	MC-2TM	kmeans	2	Yellow	263	Pfmc-2TM Maurer's cleft two transmembrane protein
36329.Q8IIY3	PF3D7_1101300	RIF	kmeans	2	Yellow	263	Rifin
36329.Q8IJ11	PF3D7_1039700	MC-2TM	kmeans	2	Yellow	263	Pfmc-2TM Maurer's cleft two transmembrane protein
36329.Q8IJ23	PF3D7_1038800	N/A	kmeans	2	Yellow	263	RESA-like protein with PHIST and DnaJ domains
36329.Q8IJ34	PF3D7_1037300	AAC1	kmeans	2	Yellow	263	ADP/ATP transporter on adenylate translocase; Belongs to the mitochondrial carrier (TC 2.A.29) family.
36329.Q8IJ85	PF3D7_1032100	DCP1	kmeans	2	Yellow	263	mRNA-decapping enzyme subunit 1, putative
36329.Q8IJD6	PF3D7_1026600	N/A	kmeans	2	Yellow	263	Uncharacterized protein
36329.Q8IJJ9	PF3D7_1020300	N/A	kmeans	2	Yellow	263	Cytoplasmic dynein intermediate chain, putative
36329.Q8IJL2	PF3D7_1019000	N/A	kmeans	2	Yellow	263	Eukaryotic translation initiation factor subunit eIF2A, putative
36329.Q8IJL6	PF3D7_1018600	N/A	kmeans	2	Yellow	263	tRNA wybutosine-synthesizing protein, putative
36329.Q8IJM4	PF3D7_1017500	ELC	kmeans	2	Yellow	263	Myosin essential light chain ELC
36329.Q8IJM9	PF3D7_1016900	ETRAMP10.3	kmeans	2	Yellow	263	Early transcribed membrane protein 10.3
36329.Q8IJN2	PF3D7_1016500	N/A	kmeans	2	Yellow	263	PRESAN domain-containing protein
36329.Q8IJQ9	PF3D7_1013600	N/A	kmeans	2	Yellow	263	Uncharacterized protein
36329.Q8IK09	PF3D7_1002700	N/A	kmeans	2	Yellow	263	Uncharacterized protein
36329.Q8IK18	PF3D7_1001800	N/A	kmeans	2	Yellow	263	PRESAN domain-containing protein
36329.Q8IK68	PF3D7_1476800	N/A	kmeans	2	Yellow	263	Lysophospholipase, putative
36329.Q8IK70	PF3D7_1476600	N/A	kmeans	2	Yellow	263	Uncharacterized protein
36329.Q8IK84	PF3D7_1475400	CRMP4	kmeans	2	Yellow	263	Cysteine repeat modular protein 4
36329.Q8IKA3	PF3D7_1473400	N/A	kmeans	2	Yellow	263	Uncharacterized protein
36329.Q8IKB5	PF3D7_1472300	N/A	kmeans	2	Yellow	263	Uncharacterized protein
36329.Q8IKC7	PF3D7_1471200	SulP	kmeans	2	Yellow	263	Inorganic anion exchanger, inorganic anion antiporter
36329.Q8IKR2	PF3D7_1456700	N/A	kmeans	2	Yellow	263	Uncharacterized protein
36329.Q8IKR4	PF3D7_1456500	N/A	kmeans	2	Yellow	263	SCD domain-containing protein
36329.Q8IKS1	PF3D7_1455700	N/A	kmeans	2	Yellow	263	Uncharacterized protein
36329.Q8IKS3	PF3D7_1455500	N/A	kmeans	2	Yellow	263	AP-1 complex subunit gamma, putative
36329.Q8IKS8	PF3D7_1455100	PTP1	kmeans	2	Yellow	263	Protein tyrosine phosphatase, putative
36329.Q8IKT9	PF3D7_1453900	N/A	kmeans	2	Yellow	263	Uncharacterized protein
36329.Q8IKX2	PF3D7_1450400	N/A	kmeans	2	Yellow	263	Zinc finger protein, putative
36329.Q8IL35	PF3D7_1443600	N/A	kmeans	2	Yellow	263	Gamma-tubulin complex component, putative
36329.Q8IL66	PF3D7_1440400	N/A	kmeans	2	Yellow	263	Zinc finger protein, putative
36329.Q8IL70	PF3D7_1440000	N/A	kmeans	2	Yellow	263	Uncharacterized protein
36329.Q8IL71	PF3D7_1439800	N/A	kmeans	2	Yellow	263	Vesicle-associated membrane protein, putative
36329.Q8IL78	PF3D7_1439100	N/A	kmeans	2	Yellow	263	DEAD/DEAH box helicase, putative
36329.Q8IL80	PF3D7_1438900	Trx-Px1	kmeans	2	Yellow	263	Thioredoxin peroxidase 1
36329.Q8IL84	PF3D7_1438400	MCA2	kmeans	2	Yellow	263	Metacaspase-2
36329.Q8IL92	PF3D7_1437400	PANK2	kmeans	2	Yellow	263	Pantothenate kinase 2, putative
36329.Q8ILK5	PF3D7_1425800	N/A	kmeans	2	Yellow	263	Uncharacterized protein
36329.Q8ILK9	PF3D7_1425400	N/A	kmeans	2	Yellow	263	DEAD/DEAH box helicase, putative
36329.Q8ILM5	PF3D7_1422800	ARP4	kmeans	2	Yellow	263	Actin-related protein, putative; Belongs to the actin family.
36329.Q8ILM9	PF3D7_1422400	N/A	kmeans	2	Yellow	263	Uncharacterized protein
36329.Q8ILN9	PF3D7_1421100	N/A	kmeans	2	Yellow	263	Uncharacterized protein
36329.Q8ILQ4	PF3D7_1419600	N/A	kmeans	2	Yellow	263	Uncharacterized protein
36329.Q8ILR0	PF3D7_1419000	N/A	kmeans	2	Yellow	263	Uncharacterized protein
36329.Q8ILR9	PF3D7_1417600	N/A	kmeans	2	Yellow	263	Protein PF14_0175
36329.Q8ILS4	PF3D7_1417200	NOT1	kmeans	2	Yellow	263	NOT family protein, putative
36329.Q8ILS9	PF3D7_1416600	N/A	kmeans	2	Yellow	263	Uncharacterized protein
36329.Q8ILX3	PF3D7_1412100	MCMBP	kmeans	2	Yellow	263	Mini-chromosome maintenance complex-binding protein, putative
36329.Q8IM16	PF3D7_1407800	PM4	kmeans	2	Yellow	263	Plasmepsin IV; Belongs to the peptidase A1 family.
36329.Q8IM41	PF3D7_1405300	N/A	kmeans	2	Yellow	263	Uncharacterized protein
36329.Q8IM57	PF3D7_1403700	TRAM	kmeans	2	Yellow	263	Translocation associated membrane protein, putative
36329.C6KTD2	PF3D7_0629700	SET1	kmeans	2	Yellow	263	Putative histone-lysine N-methyltransferase 1; Probable histone methyltransferase; Belongs to the class V-like SAM-binding methyltransferase superfamily.
36329.Q8IE95	PF3D7_1322100	SET2	kmeans	2	Yellow	263	Variant-silencing SET domain-containing protein; Histone methyltransferase that specifically represses expression of the surface antigen-coding var genes by mediating trimethylation of 'Lys-36' of histone H3 (H3K36me3) on var genes. SETVS-dependent H3K36me3 is specifically involved in var genes silencing, a central step malaria pathogenesis: each parasite contains 60 distinct var genes that each …
36329.A0A144A0U7	PF3D7_1213900	N/A	kmeans	3	Green	189	W2 domain-containing protein
36329.A0A144A382	PF3D7_1251500	DRS1	kmeans	3	Green	189	ATP-dependent RNA helicase DRS1, putative; Belongs to the DEAD box helicase family.
36329.A0A5K1K967	PF3D7_1338300	EF-1gamma	kmeans	3	Green	189	Elongation factor 1-gamma, putative
36329.C0H485	PF3D7_0322400	N/A	kmeans	3	Green	189	Regulator of initiation factor 2 (eIF2)
36329.C0H4L5	PF3D7_0706400	RPL37	kmeans	3	Green	189	Ribosomal protein L37; Binds to the 23S rRNA.
36329.C0H4L6	PF3D7_0706500	N/A	kmeans	3	Green	189	Uncharacterized protein
36329.C0H537	PF3D7_0914300	N/A	kmeans	3	Green	189	tRNA (guanine(37)-N1)-methyltransferase; Specifically methylates the N1 position of guanosine-37 in various cytoplasmic and mitochondrial tRNAs. Methylation is not dependent on the nature of the nucleoside 5' of the target nucleoside. This is the first step in the biosynthesis of wybutosine (yW), a modified base adjacent to the anticodon of tRNAs and required for accurate decoding; Belongs to the…
36329.C0H548	PF3D7_0921200	N/A	kmeans	3	Green	189	Uncharacterized protein
36329.C0H5B1	PF3D7_1312900	EIF4G	kmeans	3	Green	189	Eukaryotic translation initation factor 4 gamma
36329.C0H5C2	PF3D7_1317800	RPS19	kmeans	3	Green	189	40S ribosomal protein S19; Belongs to the universal ribosomal protein uS19 family.
36329.C0H5H0	PF3D7_1344200	GRP170	kmeans	3	Green	189	Endoplasmic reticulum chaperone GRP170
36329.C0H5J0	PF3D7_1359000	N/A	kmeans	3	Green	189	Uncharacterized protein
36329.C6KT34	PF3D7_0619400	N/A	kmeans	3	Green	189	Cell division cycle protein 48 homologue, putative
36329.C6KT55	PF3D7_0621800	N/A	kmeans	3	Green	189	Nascent polypeptide-associated complex subunit alpha, putative
36329.C6KT64	PF3D7_0622800	N/A	kmeans	3	Green	189	Leucine--tRNA ligase, putative; Belongs to the class-I aminoacyl-tRNA synthetase family.
36329.C6KT67	PF3D7_0623100	NAB2	kmeans	3	Green	189	Nuclear polyadenylated RNA-binding protein NAB2, putative
36329.C6KTA4	PF3D7_0626800	PyrK	kmeans	3	Green	189	Pyruvate kinase; Belongs to the pyruvate kinase family.
36329.C6KTA7	PF3D7_0627100	N/A	kmeans	3	Green	189	Ankyrin-repeat protein, putative
36329.C6KTB1	PF3D7_0627500	DJ1	kmeans	3	Green	189	Protein DJ-1
36329.C6KTB3	PF3D7_0627700	N/A	kmeans	3	Green	189	Transportin
36329.C6KTB4	PF3D7_0627800	ACAS	kmeans	3	Green	189	Acetyl-CoA synthetase, putative
36329.C6KTB8	PF3D7_0628200	PK4	kmeans	3	Green	189	Protein kinase PK4
36329.C6S3C2	PF3D7_1005600	N/A	kmeans	3	Green	189	DnaJ protein, putative
36329.Q8IJN7	PF3D7_1015900	ENO	kmeans	3	Green	189	Enolase
36329.O77312	PF3D7_0302900	N/A	kmeans	3	Green	189	Exportin-1, putative
36329.Q8IL88	PF3D7_1437900	HSP40	kmeans	3	Green	189	HSP40, subfamily A
36329.O00806	PF3D7_0309600	PfP2	kmeans	3	Green	189	60S acidic ribosomal protein P2; Plays an important role in the elongation step of protein synthesis.
36329.O77323	PF3D7_0308200	CCT7	kmeans	3	Green	189	T-complex protein 1 subunit eta; Molecular chaperone; assists the folding of proteins upon ATP hydrolysis. Known to play a role, in vitro, in the folding of actin and tubulin (By similarity).
36329.O77381	PF3D7_0317600	RPS11	kmeans	3	Green	189	40S ribosomal protein S11, putative; Belongs to the universal ribosomal protein uS17 family.
36329.O77395	PF3D7_0316800	N/A	kmeans	3	Green	189	40S ribosomal protein S15A, putative; Belongs to the universal ribosomal protein uS8 family.
36329.O96137	PF3D7_0203600	N/A	kmeans	3	Green	189	Uncharacterized protein
36329.O96142	PF3D7_0204500	AspAT	kmeans	3	Green	189	Aspartate aminotransferase
36329.O96153	PF3D7_0205900	RPN1	kmeans	3	Green	189	26S proteasome regulatory subunit RPN1, putative
36329.O96223	PF3D7_0214300	N/A	kmeans	3	Green	189	Uncharacterized protein
36329.O97248	PF3D7_0306900	N/A	kmeans	3	Green	189	40S ribosomal protein S23, putative; Belongs to the universal ribosomal protein uS12 family.
36329.O97266	PF3D7_0315100	eIF4E	kmeans	3	Green	189	Eukaryotic translation initiation factor 4E; Belongs to the eukaryotic initiation factor 4E family.
36329.O97299	PF3D7_0323100	N/A	kmeans	3	Green	189	Uncharacterized protein
36329.O97303	PF3D7_0323700	SART1	kmeans	3	Green	189	U4/U6.U5 tri-snRNP-associated protein 1, putative
36329.Q6LFH8	PF3D7_0608800	OAT	kmeans	3	Green	189	Ornithine aminotransferase; The enzyme has a very narrow substrate specificity and can only catalyze the transamination of alpha-ketoglutarate with ornithine or N-acetylornithine and of glutamate-5-semialdehyde with glutamate and alanine; Belongs to the class-III pyridoxal-phosphate-dependent aminotransferase family.
36329.P27362	PF3D7_0922500	PGK	kmeans	3	Green	189	Phosphoglycerate kinase
36329.Q76NM3	PF3D7_1324900	LDH	kmeans	3	Green	189	L-lactate dehydrogenase; Belongs to the LDH/MDH superfamily.
36329.Q76NN7	PF3D7_0322000	CYP19A	kmeans	3	Green	189	Peptidyl-prolyl cis-trans isomerase; PPIases accelerate the folding of proteins. It catalyzes the cis-trans isomerization of proline imidic peptide bonds in oligopeptides; Belongs to the cyclophilin-type PPIase family.
36329.Q7KQK6	PF3D7_1117700	RAN	kmeans	3	Green	189	GTP-binding nuclear protein; GTP-binding protein involved in nucleocytoplasmic transport. Required for the import of protein into the nucleus and also for RNA export. Involved in chromatin condensation and control of cell cycle. ; Belongs to the small GTPase superfamily. Ran family.
36329.Q7KQL9	PF3D7_1444800	FBPA	kmeans	3	Green	189	Fructose-bisphosphate aldolase
36329.Q8I0P6	PF3D7_1357000	N/A	kmeans	3	Green	189	Elongation factor 1-alpha; This protein promotes the GTP-dependent binding of aminoacyl- tRNA to the A-site of ribosomes during protein biosynthesis.
36329.Q8I0V4	PF3D7_1222300	GRP94	kmeans	3	Green	189	Endoplasmin, putative
36329.Q8I0W8	PF3D7_0513600	N/A	kmeans	3	Green	189	Deoxyribodipyrimidine photo-lyase, putative
36329.Q8I1Q0	PF3D7_0418700	N/A	kmeans	3	Green	189	RNA-binding protein NOB1, putative; Belongs to the NOB1 family.
36329.Q8I1X1	PF3D7_0405700	N/A	kmeans	3	Green	189	Lysine decarboxylase, putative
36329.Q8I240	PF3D7_0110500	BDP3	kmeans	3	Green	189	Bromodomain protein, putative
36329.Q8I2K4	PF3D7_0931100	N/A	kmeans	3	Green	189	Nucleolar protein Nop52, putative
36329.Q8I2T7	PF3D7_0921600	N/A	kmeans	3	Green	189	Tetratricopeptide repeat protein, putative
36329.Q8I2U5	PF3D7_0920800	IMPDH	kmeans	3	Green	189	Inosine-5'-monophosphate dehydrogenase; Catalyzes the conversion of inosine 5'-phosphate (IMP) to xanthosine 5'-phosphate (XMP), the first committed and rate-limiting step in the de novo synthesis of guanine nucleotides, and therefore plays an important role in the regulation of cell growth.
36329.Q8I2X4	PF3D7_0917900	BIP	kmeans	3	Green	189	Heat shock protein 70; Belongs to the heat shock protein 70 family.
36329.Q8I324	PF3D7_0912800	GCD10	kmeans	3	Green	189	tRNA (Adenine(58)-N(1))-methyltransferase non-catalytic subunit TRM6, putative
36329.Q8I353	PF3D7_0909900	N/A	kmeans	3	Green	189	Helicase SKI2W, putative
36329.Q8I365	PF3D7_0908600	N/A	kmeans	3	Green	189	Putative tRNA (cytidine(32)/guanosine(34)-2'-O)-methyltransferase; Methylates the 2'-O-ribose of nucleotides at positions 32 and 34 of the tRNA anticodon loop of substrate tRNAs.
36329.Q8I3H9	PF3D7_0528800	N/A	kmeans	3	Green	189	Nucleolar preribosomal GTPase, putative
36329.Q8I3J0	PF3D7_0527500	HIP	kmeans	3	Green	189	Hsc70-interacting protein
36329.Q8I3K0	PF3D7_0526500	N/A	kmeans	3	Green	189	Suf domain-containing protein
36329.Q8I3T1	PF3D7_0517700	EIF3B	kmeans	3	Green	189	Eukaryotic translation initiation factor 3 subunit B; Component of the eukaryotic translation initiation factor 3 (eIF-3) complex, which is involved in protein synthesis and, together with other initiation factors, stimulates binding of mRNA and methionyl-tRNAi to the 40S ribosome; Belongs to the eIF-3 subunit B family. Rule:MF_03001, ECO:0000256|PIRNR:PIRNR036424,
36329.Q8I3T8	PF3D7_0517000	N/A	kmeans	3	Green	189	60S ribosomal protein L12, putative; Belongs to the universal ribosomal protein uL11 family.
36329.Q8I3X4	PF3D7_0513300	PNP	kmeans	3	Green	189	Purine nucleoside phosphorylase
36329.Q8I3Y6	PF3D7_0512000	PFD6	kmeans	3	Green	189	Probable prefoldin subunit 6; Binds specifically to cytosolic chaperonin (c-CPN) and transfers target proteins to it. Binds to nascent polypeptide chain and promotes folding in an environment in which there are many competing pathways for nonnative proteins (By similarity).
36329.Q8I403	PF3D7_0510100	N/A	kmeans	3	Green	189	Uncharacterized protein
36329.Q8I441	PF3D7_0506100	N/A	kmeans	3	Green	189	60S ribosomal subunit protein L24, putative
36329.Q8I492	PF3D7_0500800	MESA	kmeans	3	Green	189	Mature parasite-infected erythrocyte surface antigen
36329.Q8I5B3	PF3D7_1230700	SEC13	kmeans	3	Green	189	Protein transport protein SEC13; Belongs to the WD repeat SEC13 family.
36329.Q8I5C4	PF3D7_1229500	CCT3	kmeans	3	Green	189	T-complex protein 1 subunit gamma
36329.Q8I5C6	PF3D7_1229300	PIC1	kmeans	3	Green	189	Uncharacterized protein
36329.Q8I5C7	PF3D7_1229100	MRP2	kmeans	3	Green	189	Multidrug resistance-associated protein 2
36329.Q8I5F1	PF3D7_1226700	RRP9	kmeans	3	Green	189	U3 small nucleolar RNA-interacting protein 2, putative
36329.Q8I5H3	PF3D7_1224400	N/A	kmeans	3	Green	189	WD repeat-containing protein, putative
36329.Q8I5H4	PF3D7_1224300	PABP1	kmeans	3	Green	189	Polyadenylate-binding protein; Binds the poly(A) tail of mRNA. ; Belongs to the polyadenylate-binding protein type-1 family.
36329.Q8I5N9	PF3D7_1216900	N/A	kmeans	3	Green	189	DNA-binding chaperone, putative
36329.Q8I5T5	PF3D7_1211600	LSD1	kmeans	3	Green	189	Lysine-specific histone demethylase 1, putative
36329.Q8I5X8	PF3D7_1206700	EIF5	kmeans	3	Green	189	Eukaryotic translation initiation factor 5, putative
36329.Q8I5Y3	PF3D7_1206200	EIF3C	kmeans	3	Green	189	Eukaryotic translation initiation factor 3 subunit C; Component of the eukaryotic translation initiation factor 3 (eIF-3) complex, which is involved in protein synthesis of a specialized repertoire of mRNAs and, together with other initiation factors, stimulates binding of mRNA and methionyl-tRNAi to the 40S ribosome. The eIF-3 complex specifically targets and initiates translation of a subset of…
36329.Q8I5Y6	PF3D7_1205900	N/A	kmeans	3	Green	189	Uncharacterized protein
36329.Q8I5Z3	PF3D7_1205200	HADO	kmeans	3	Green	189	HAD domain ookinete protein, putative
36329.Q8I603	PF3D7_1204300	EIF5A	kmeans	3	Green	189	Eukaryotic translation initiation factor 5A
36329.Q8IAM3	PF3D7_0802300	PWP2	kmeans	3	Green	189	Periodic tryptophan protein 2, putative
36329.Q8IAR1	PF3D7_0807100	PSH3	kmeans	3	Green	189	DNA helicase PSH3
36329.Q8IAZ7	PF3D7_0816000	RRB1	kmeans	3	Green	189	Ribosome assembly protein RRB1, putative
36329.Q8IB24	PF3D7_0818900	HSP70	kmeans	3	Green	189	Heat shock protein 70; Belongs to the heat shock protein 70 family.
36329.Q8IBA2	PF3D7_0827000	DBP10	kmeans	3	Green	189	ATP-dependent RNA helicase DBP10, putative
36329.Q8IBG5	PF3D7_0729400	N/A	kmeans	3	Green	189	Ribosome biogenesis protein BRX1, putative
36329.Q8IBG6	PF3D7_0729300	NMD3	kmeans	3	Green	189	60S ribosomal export protein NMD3, putative
36329.Q8IBH7	PF3D7_0728000	eIF2alpha	kmeans	3	Green	189	Eukaryotic translation initiation factor 2 subunit alpha
36329.Q8IBJ0	PF3D7_0726600	N/A	kmeans	3	Green	189	Uncharacterized protein
36329.Q8IBJ5	PF3D7_0726100	N/A	kmeans	3	Green	189	Uncharacterized protein
36329.Q8IBN5	PF3D7_0721600	N/A	kmeans	3	Green	189	40S ribosomal protein S5, putative; Belongs to the universal ribosomal protein uS7 family.
36329.Q8IBT2	PF3D7_0716800	EIF3I	kmeans	3	Green	189	Eukaryotic translation initiation factor 3 subunit I; Component of the eukaryotic translation initiation factor 3 (eIF-3) complex, which is involved in protein synthesis of a specialized repertoire of mRNAs and, together with other initiation factors, stimulates binding of mRNA and methionyl-tRNAi to the 40S ribosome. The eIF-3 complex specifically targets and initiates translation of a subset of…
36329.Q8IBT9	PF3D7_0716100	SDA1	kmeans	3	Green	189	Protein SDA1, putative
36329.Q8IC01	PF3D7_0708800	HSP110c	kmeans	3	Green	189	Heat shock protein 110
36329.Q8IC05	PF3D7_0708400	HSP90	kmeans	3	Green	189	Heat shock protein 90
36329.Q8IC12	PF3D7_0707700	N/A	kmeans	3	Green	189	E3 ubiquitin-protein ligase, putative
36329.Q8IC28	PF3D7_0704200	NSUN1	kmeans	3	Green	189	tRNA m5C-methyltransferase, putative; Belongs to the class I-like SAM-binding methyltransferase superfamily. RsmB/NOP family.
36329.Q8IDI5	PF3D7_1351400	N/A	kmeans	3	Green	189	60S ribosomal protein L17, putative; Belongs to the universal ribosomal protein uL22 family.
36329.Q8IDI9	PF3D7_1351000	N/A	kmeans	3	Green	189	Phosphatidylinositol transfer protein, putative
36329.Q8IDJ8	PF3D7_1350100	KRS1	kmeans	3	Green	189	Lysine--tRNA ligase
36329.Q8IDK7	PF3D7_1349200	N/A	kmeans	3	Green	189	Glutamate--tRNA ligase, putative; Belongs to the class-I aminoacyl-tRNA synthetase family.
36329.Q8IDM6	PF3D7_1347200	NT1	kmeans	3	Green	189	Nucleoside transporter 1
36329.Q8IDN6	PF3D7_1346100	SEC61A	kmeans	3	Green	189	Protein transport protein SEC61 subunit alpha
36329.Q8IDS6	PF3D7_1341200	N/A	kmeans	3	Green	189	60S ribosomal protein L18a; Belongs to the eukaryotic ribosomal protein eL20 family.
36329.Q8IDT3	PF3D7_1340300	N/A	kmeans	3	Green	189	Nucleolar complex protein 2, putative
36329.Q8IEC8	PF3D7_1318800	SEC63	kmeans	3	Green	189	Translocation protein SEC63, putative
36329.Q8IEK1	PF3D7_1311800	M1AAP	kmeans	3	Green	189	M1-family alanyl aminopeptidase
36329.Q8IEL1	PF3D7_1310400	N/A	kmeans	3	Green	189	Uncharacterized protein
36329.Q8IEM2	PF3D7_1309200	PPM6	kmeans	3	Green	189	Protein phosphatase PPM6, putative
36329.Q8IEN2	PF3D7_1308300	RPS27	kmeans	3	Green	189	40S ribosomal protein S27
36329.Q8IEN3	PF3D7_1308200	cpsSII	kmeans	3	Green	189	Carbamoyl phosphate synthetase
36329.Q8IEN6	PF3D7_1307900	N/A	kmeans	3	Green	189	Tripartite motif protein, putative
36329.Q8IEP4	PF3D7_1307100	UTP6	kmeans	3	Green	189	U3 small nucleolar RNA-associated protein 6, putative
36329.Q8IET7	PF3D7_1302800	N/A	kmeans	3	Green	189	40S ribosomal protein S7; Belongs to the eukaryotic ribosomal protein eS7 family.
36329.Q8IHQ8	PF3D7_1146000	RSA4	kmeans	3	Green	189	Ribosome assembly protein 4, putative
36329.Q8IHS5	PF3D7_1144000	RPS21	kmeans	3	Green	189	40S ribosomal protein S21; Belongs to the eukaryotic ribosomal protein eS21 family.
36329.Q8IHU0	PF3D7_1142500	RPL28	kmeans	3	Green	189	60S ribosomal protein L28
36329.Q8IHZ6	PF3D7_1136800	N/A	kmeans	3	Green	189	DnaJ protein, putative
36329.Q8II43	PF3D7_1132200	TCP1	kmeans	3	Green	189	T-complex protein 1 subunit alpha
36329.Q8II61	PF3D7_1130200	PfP0	kmeans	3	Green	189	60S acidic ribosomal protein P0; Ribosomal protein P0 is the functional equivalent of E.coli protein L10.
36329.Q8II69	PF3D7_1129400	NSUN3	kmeans	3	Green	189	rRNA (Cytosine-C(5))-methyltransferase, putative; Belongs to the class I-like SAM-binding methyltransferase superfamily. RsmB/NOP family.
36329.Q8II82	PF3D7_1128100	N/A	kmeans	3	Green	189	Prefoldin subunit 5, putative
36329.Q8IIA4	PF3D7_1126000	ThrRS	kmeans	3	Green	189	Threonine--tRNA ligase
36329.Q8IIB5	PF3D7_1124800	RRS1	kmeans	3	Green	189	Ribosome biogenesis regulatory protein; Involved in ribosomal large subunit assembly. ; Belongs to the RRS1 family.
36329.Q8IID1	PF3D7_1123200	LRR11	kmeans	3	Green	189	Leucine-rich repeat protein
36329.Q8IIE1	PF3D7_1122500	KIC10	kmeans	3	Green	189	Uncharacterized protein
36329.Q8IIE2	PF3D7_1122400	N/A	kmeans	3	Green	189	Uncharacterized protein
36329.Q8III3	PF3D7_1118500	NOP56	kmeans	3	Green	189	Nucleolar protein 56, putative
36329.Q8IIR7	PF3D7_1108600	ERC	kmeans	3	Green	189	Endoplasmic reticulum-resident calcium binding protein
36329.Q8IIS9	PF3D7_1107300	PAIP1	kmeans	3	Green	189	Polyadenylate-binding protein-interacting protein 1, putative
36329.Q8IIW2	PF3D7_1104000	N/A	kmeans	3	Green	189	Phenylalanine--tRNA ligase beta subunit
36329.Q8IIX0	PF3D7_1103100	RPP1	kmeans	3	Green	189	60S acidic ribosomal protein P1, putative; Belongs to the eukaryotic ribosomal protein P1/P2 family.
36329.Q8IJ76	PF3D7_1033200	ETRAMP10.2	kmeans	3	Green	189	Early transcribed membrane protein 10.2
36329.Q8IJ77	PF3D7_1033100	AdoMetDC/ODC	kmeans	3	Green	189	S-adenosylmethionine decarboxylase/ornithine decarboxylase
36329.Q8IJ88	PF3D7_1031700	I3	kmeans	3	Green	189	Protein phosphatase inhibitor 3
36329.Q8IJ92	PF3D7_1031300	N/A	kmeans	3	Green	189	SAE2 domain-containing protein
36329.Q8IJA9	PF3D7_1029600	ADA	kmeans	3	Green	189	Adenosine deaminase
36329.Q8IJC0	PF3D7_1028400	N/A	kmeans	3	Green	189	Nucleolar preribosomal assembly protein, putative
36329.Q8IJC6	PF3D7_1027800	RPL3	kmeans	3	Green	189	60S ribosomal protein L3; Belongs to the universal ribosomal protein uL3 family.
36329.Q8IJD4	PF3D7_1026800	RPS2	kmeans	3	Green	189	40S ribosomal protein SA; Required for the assembly and/or stability of the 40S ribosomal subunit. Required for the processing of the 20S rRNA- precursor to mature 18S rRNA in a late step of the maturation of 40S ribosomal subunits.
36329.Q8IJJ5	PF3D7_1020700	N/A	kmeans	3	Green	189	RNA cytidine acetyltransferase; RNA cytidine acetyltransferase with specificity toward both 18S rRNA and tRNAs. Catalyzes the formation of N(4)-acetylcytidine (ac4C) in 18S rRNA. Required for early nucleolar cleavages of precursor rRNA at sites A0, A1 and A2 during 18S rRNA synthesis. Catalyzes the formation of ac4C in serine and leucine tRNAs. Requires a tRNA-binding adapter protein for full tRN…
36329.Q8IJK8	PF3D7_1019400	N/A	kmeans	3	Green	189	60S ribosomal protein L30e, putative
36329.Q8IJQ6	PF3D7_1013900	N/A	kmeans	3	Green	189	Translation initiation factor eIF-2B subunit delta, putative; Belongs to the eIF-2B alpha/beta/delta subunits family.
36329.Q8IJS1	PF3D7_1012400	HGPRT	kmeans	3	Green	189	Hypoxanthine phosphoribosyltransferase; Belongs to the purine/pyrimidine phosphoribosyltransferase family.
36329.Q8IJV3	PF3D7_1009200	N/A	kmeans	3	Green	189	Ribonuclease, putative
36329.Q8IJW4	PF3D7_1007900	EIF3D	kmeans	3	Green	189	Eukaryotic translation initiation factor 3 subunit D; mRNA cap-binding component of the eukaryotic translation initiation factor 3 (eIF-3) complex, which is involved in protein synthesis of a specialized repertoire of mRNAs and, together with other initiation factors, stimulates binding of mRNA and methionyl-tRNAi to the 40S ribosome. The eIF-3 complex specifically targets and initiates translati…
36329.Q8IJZ7	PF3D7_1004000	N/A	kmeans	3	Green	189	60S ribosomal protein L13, putative
36329.Q8IKF0	PF3D7_1468700	eIF4A	kmeans	3	Green	189	Eukaryotic initiation factor 4A; Belongs to the DEAD box helicase family.
36329.Q8IKH3	PF3D7_1466300	RPN2	kmeans	3	Green	189	26S proteasome regulatory subunit RPN2, putative; Belongs to the proteasome subunit S1 family.
36329.Q8IKJ1	PF3D7_1464600	UIS2	kmeans	3	Green	189	Serine/threonine protein phosphatase UIS2, putative
36329.Q8IKJ2	PF3D7_1464500	N/A	kmeans	3	Green	189	Uncharacterized protein
36329.Q8IKK7	PF3D7_1462800	GAPDH	kmeans	3	Green	189	Glyceraldehyde-3-phosphate dehydrogenase
36329.Q8IKM5	PF3D7_1460700	RPL27	kmeans	3	Green	189	60S ribosomal protein L27
36329.Q8IKP5	PF3D7_1458600	N/A	kmeans	3	Green	189	Zinc finger protein, putative
36329.Q8IKU0	PF3D7_1453800	GluPho	kmeans	3	Green	189	Bifunctional glucose-6-phosphate 1-dehydrogenase/6-phosphogluconolactonase; Bifunctional enzyme which catalyzes the first two steps of the oxidative pentose-phosphate pathway, which represents a route for the dissimilation of carbohydrates besides glycolysis. The main function of this enzyme is to provide reducing power (NADPH) and pentose phosphates for fatty acid and nucleic acid synthesis. ; I…
36329.Q8IKV7	PF3D7_1451900	TSR1	kmeans	3	Green	189	Ribosome biogenesis protein TSR1, putative
36329.Q8IKW4	PF3D7_1451200	N/A	kmeans	3	Green	189	Uncharacterized protein
36329.Q8IKW5	PF3D7_1451100	eEF2	kmeans	3	Green	189	Elongation factor 2
36329.Q8IKW6	PF3D7_1451000	N/A	kmeans	3	Green	189	Uncharacterized protein
36329.Q8IKX1	PF3D7_1450500	N/A	kmeans	3	Green	189	Uncharacterized protein
36329.Q8IKX8	PF3D7_1449700	RRP6	kmeans	3	Green	189	Exosome complex exonuclease RRP6
36329.Q8IKZ5	PF3D7_1448000	UTP12	kmeans	3	Green	189	U3 small nucleolar RNA-associated protein 12, putative
36329.Q8IL09	PF3D7_1446400	pdhB	kmeans	3	Green	189	Pyruvate dehydrogenase E1 component subunit beta; The pyruvate dehydrogenase complex catalyzes the overall conversion of pyruvate to acetyl-CoA and CO2.
36329.Q8IL58	PF3D7_1441200	N/A	kmeans	3	Green	189	60S ribosomal protein L1, putative
36329.Q8IL86	PF3D7_1438100	SEC62	kmeans	3	Green	189	Translocation protein SEC62, putative
36329.Q8ILA4	PF3D7_1436000	GPI	kmeans	3	Green	189	Glucose-6-phosphate isomerase; Belongs to the GPI family.
36329.Q8ILA6	PF3D7_1435800	ERA	kmeans	3	Green	189	GTPase Era, putative
36329.Q8ILC9	PF3D7_1433400	PHD2	kmeans	3	Green	189	Zinc finger protein, putative
36329.Q8ILF2	PF3D7_1431300	LSG1	kmeans	3	Green	189	Large subunit GTPase 1, putative
36329.Q8ILJ7	PF3D7_1426700	PEPC	kmeans	3	Green	189	Phosphoenolpyruvate carboxylase
36329.Q8ILK2	PF3D7_1426100	BTF3	kmeans	3	Green	189	Nascent polypeptide-associated complex subunit beta
36329.Q8ILL3	PF3D7_1424100	RPL5	kmeans	3	Green	189	60S ribosomal protein L5, putative
36329.Q8ILM8	PF3D7_1422500	HRD1	kmeans	3	Green	189	ERAD-associated E3 ubiquitin-protein ligase HRD1
36329.Q8ILU6	PF3D7_1415000	UDG	kmeans	3	Green	189	Uracil-DNA glycosylase; Excises uracil residues from the DNA which can arise as a result of misincorporation of dUMP residues by DNA polymerase or due to deamination of cytosine.
36329.Q8ILV2	PF3D7_1414300	N/A	kmeans	3	Green	189	60S ribosomal protein L10, putative
36329.Q8ILV8	PF3D7_1413700	N/A	kmeans	3	Green	189	Uncharacterized protein
36329.Q8ILW8	PF3D7_1412600	DHS	kmeans	3	Green	189	Deoxyhypusine synthase
36329.Q8ILY6	PF3D7_1410900	N/A	kmeans	3	Green	189	Ribosome maturation protein SBDS, putative
36329.Q8ILY9	PF3D7_1410600	eIF2gamma	kmeans	3	Green	189	Eukaryotic translation initiation factor 2 subunit gamma, putative
36329.Q8ILZ3	PF3D7_1410200	CTPS	kmeans	3	Green	189	CTP synthase; Catalyzes the ATP-dependent amination of UTP to CTP with either L-glutamine or ammonia as the source of nitrogen.
36329.Q8IM10	PF3D7_1408600	N/A	kmeans	3	Green	189	40S ribosomal protein S8; Belongs to the eukaryotic ribosomal protein eS8 family.
36329.Q8IM15	PF3D7_1408100	PMIII	kmeans	3	Green	189	Plasmepsin III; Belongs to the peptidase A1 family.
36329.Q8IM19	PF3D7_1407500	TRM112	kmeans	3	Green	189	Multifunctional methyltransferase subunit TRM112, putative
36329.Q8IM23	PF3D7_1407100	NOP1	kmeans	3	Green	189	rRNA 2'-O-methyltransferase fibrillarin, putative
36329.Q9U0G5	PF3D7_0412700	VAR	kmeans	3	Green	189	Erythrocyte membrane protein 1, PfEMP1
36329.Q8I3Z5	PF3D7_0511000	TCTP	kmeans	3	Green	189	Translationally-controlled tumor protein homolog; Involved in calcium binding and microtubule stabilization. ; Belongs to the TCTP family.
36329.Q7KQM0	PF3D7_1439900	TIM	kmeans	3	Green	189	Triosephosphate isomerase; Belongs to the triosephosphate isomerase family.
36329.Q8I5R7	PF3D7_1213800	PRS	kmeans	3	Green	189	Proline--tRNA ligase; Catalyzes the attachment of proline to tRNA(Pro) in a two- step reaction: proline is first activated by ATP to form Pro-AMP and then transferred to the acceptor end of tRNA(Pro) (By similarity). Functions in trans to edit the amino acid moiety from incorrectly charged Ala-tRNA(Pro). Has no activity on correctly charged Pro- tRNA(Pro) or Ala-tRNA(Ala).
36329.A0A143ZVJ7	PF3D7_0717600	IMC32	kmeans	4	Cyan	273	Uncharacterized protein
36329.A0A143ZVJ8	PF3D7_0719500	CDC50A	kmeans	4	Cyan	273	LEM3/CDC50 family protein, putative
36329.A0A143ZVL6	PF3D7_0806700	N/A	kmeans	4	Cyan	273	Uncharacterized protein
36329.A0A143ZVW7	PF3D7_0704300	N/A	kmeans	4	Cyan	273	Uncharacterized protein
36329.A0A143ZWQ6	PF3D7_0721000	N/A	kmeans	4	Cyan	273	Uncharacterized protein
36329.A0A143ZXM1	PF3D7_0806100	N/A	kmeans	4	Cyan	273	Uncharacterized protein
36329.A0A143ZYA5	PF3D7_1025900	N/A	kmeans	4	Cyan	273	Uncharacterized protein
36329.A0A143ZZM5	PF3D7_1206300	N/A	kmeans	4	Cyan	273	Uncharacterized protein
36329.A0A143ZZV5	PF3D7_0804500	N/A	kmeans	4	Cyan	273	Uncharacterized protein
36329.A0A144A1B9	PF3D7_1232500	N/A	kmeans	4	Cyan	273	CG2-related protein, putative
36329.A0A144A2Q6	PF3D7_1467600	N/A	kmeans	4	Cyan	273	Uncharacterized protein
36329.A0A5K1K895	PF3D7_0615900	N/A	kmeans	4	Cyan	273	Protein phosphatase, putative
36329.A0A5K1K8F4	PF3D7_1319600	N/A	kmeans	4	Cyan	273	ACDC domain-containing protein, putative
36329.A0A5K1K8J3	PF3D7_1361800	GAC	kmeans	4	Cyan	273	Glideosome-associated connector
36329.A0A5K1K8M3	PF3D7_1369200	N/A	kmeans	4	Cyan	273	Uncharacterized protein
36329.A0A5K1K8N5	PF3D7_0701600	MC-2TM	kmeans	4	Cyan	273	Pfmc-2TM Maurer's cleft two transmembrane protein
36329.A0A5K1K8R0	PF3D7_1348400	N/A	kmeans	4	Cyan	273	Uncharacterized protein
36329.A0A5K1K8R5	PF3D7_1325900	N/A	kmeans	4	Cyan	273	Uncharacterized protein
36329.A0A5K1K8U0	PF3D7_1359600	N/A	kmeans	4	Cyan	273	Uncharacterized protein
36329.A0A5K1K8V1	PF3D7_1334100	N/A	kmeans	4	Cyan	273	Uncharacterized protein
36329.A0A5K1K8Y0	PF3D7_1337500	N/A	kmeans	4	Cyan	273	Uncharacterized protein
36329.A0A5K1K8Y1	PF3D7_1345600	N/A	kmeans	4	Cyan	273	Inner membrane complex protein
36329.A0A5K1K982	PF3D7_1328200	N/A	kmeans	4	Cyan	273	Uncharacterized protein
36329.A0A5K1K988	PF3D7_1351700	IMC1f	kmeans	4	Cyan	273	Inner membrane complex protein 1f, putative
36329.A0A5K1K993	PF3D7_1339900	ABCB5	kmeans	4	Cyan	273	ABC transporter B family member 5, putative
36329.A0A5K1K9A0	PF3D7_1364200	NUP205	kmeans	4	Cyan	273	Nucleoporin NUP205, putative
36329.A0A5K1K9B5	PF3D7_1363100	N/A	kmeans	4	Cyan	273	Uncharacterized protein
36329.A0A5K1K9B8	PF3D7_1364300	PRP16	kmeans	4	Cyan	273	Pre-mRNA-splicing factor ATP-dependent RNA helicase PRP16
36329.A0A5K1K9F8	PF3D7_1349500	N/A	kmeans	4	Cyan	273	Uncharacterized protein
36329.B9ZSJ1	PF3D7_0113200	N/A	kmeans	4	Cyan	273	Uncharacterized protein
36329.B9ZSJ3	PF3D7_0114100	MC-2TM	kmeans	4	Cyan	273	Pfmc-2TM Maurer's cleft two transmembrane protein
36329.B9ZSJ6	PF3D7_0419900	N/A	kmeans	4	Cyan	273	Phosphatidylinositol 4-kinase, putative; Belongs to the PI3/PI4-kinase family.
36329.C0H488	PF3D7_0403600	N/A	kmeans	4	Cyan	273	Uncharacterized protein
36329.C0H489	PF3D7_0405100	SEC24B	kmeans	4	Cyan	273	Protein transport protein Sec24B, putative
36329.C0H491	PF3D7_0406500	N/A	kmeans	4	Cyan	273	NYN domain-containing protein, putative
36329.C0H4A5	PF3D7_0414900	ARO	kmeans	4	Cyan	273	Armadillo-domain containing rhoptry protein
36329.C0H4F8	PF3D7_0522400	N/A	kmeans	4	Cyan	273	Uncharacterized protein
36329.C0H4K4	PF3D7_0704100	BTP2	kmeans	4	Cyan	273	Basal complex transmembrane protein 2
36329.C0H4L9	PF3D7_0707200	N/A	kmeans	4	Cyan	273	Uncharacterized protein
36329.C0H4M0	PF3D7_0707300	RAMA	kmeans	4	Cyan	273	Rhoptry-associated membrane antigen
36329.C0H4M2	PF3D7_0708000	N/A	kmeans	4	Cyan	273	Cytoskeleton associated protein, putative
36329.C0H4R1	PF3D7_0802600	ACbeta	kmeans	4	Cyan	273	Adenylyl cyclase beta
36329.C0H4S2	PF3D7_0806300	FLP	kmeans	4	Cyan	273	Ferlin-like protein, putative
36329.C0H4S6	PF3D7_0807200	N/A	kmeans	4	Cyan	273	Uncharacterized protein
36329.C0H4S8	PF3D7_0807600	N/A	kmeans	4	Cyan	273	Uncharacterized protein
36329.C0H4T0	PF3D7_0808100	N/A	kmeans	4	Cyan	273	AP-3 complex subunit delta, putative
36329.C0H4T3	PF3D7_0809600	N/A	kmeans	4	Cyan	273	Peptidase family C50, putative
36329.C0H4T6	PF3D7_0810300	PPM5	kmeans	4	Cyan	273	Protein phosphatase PPM5, putative
36329.C0H4U0	PF3D7_0811400	N/A	kmeans	4	Cyan	273	Uncharacterized protein
36329.C0H4U5	PF3D7_0813400	N/A	kmeans	4	Cyan	273	Uncharacterized protein
36329.C0H4V6	PF3D7_0818200	14-3-3I	kmeans	4	Cyan	273	14-3-3 protein; Belongs to the 14-3-3 family.
36329.C0H4W5	PF3D7_0821100	PK1	kmeans	4	Cyan	273	Protein kinase 1
36329.C0H516	PF3D7_0903200	RAB7	kmeans	4	Cyan	273	Ras-related protein RAB7
36329.C0H517	PF3D7_0903300	N/A	kmeans	4	Cyan	273	Uncharacterized protein
36329.C0H527	PF3D7_0908500	N/A	kmeans	4	Cyan	273	Uncharacterized protein
36329.C0H531	PF3D7_0910900	N/A	kmeans	4	Cyan	273	DNA primase large subunit; DNA primase is the polymerase that synthesizes small RNA primers for the Okazaki fragments made during discontinuous DNA replication; Belongs to the eukaryotic-type primase large subunit family.
36329.C0H536	PF3D7_0914100	N/A	kmeans	4	Cyan	273	Uncharacterized protein
36329.C0H545	PF3D7_0920000	ELO3	kmeans	4	Cyan	273	Elongation of fatty acids protein
36329.C0H552	PF3D7_0922800	N/A	kmeans	4	Cyan	273	Uncharacterized protein
36329.C0H571	PF3D7_0929400	RhopH2	kmeans	4	Cyan	273	High molecular weight rhoptry protein 2
36329.C0H584	PF3D7_0932100	N/A	kmeans	4	Cyan	273	Protein MAM3, putative
36329.C0H5A5	PF3D7_1308000	N/A	kmeans	4	Cyan	273	Uncharacterized protein
36329.C0H5H1	PF3D7_1344300	N/A	kmeans	4	Cyan	273	Zinc finger protein, putative
36329.C0H5J6	PF3D7_1361100	SEC24A	kmeans	4	Cyan	273	Protein transport protein Sec24A
36329.C0H5L6	PF3D7_1369400	N/A	kmeans	4	Cyan	273	Uncharacterized protein
36329.C6KSN9	PF3D7_0604100	SIP2	kmeans	4	Cyan	273	AP2 domain transcription factor
36329.C6KSP3	PF3D7_0604500	N/A	kmeans	4	Cyan	273	GYF domain-containing protein
36329.C6KSR4	PF3D7_0606600	N/A	kmeans	4	Cyan	273	Uncharacterized protein
36329.C6KSR5	PF3D7_0606700	N/A	kmeans	4	Cyan	273	Coatomer alpha subunit, putative
36329.C6KSS4	PF3D7_0607600	SAS6	kmeans	4	Cyan	273	Spindle assembly abnormal protein 6, putative
36329.C6KSS5	PF3D7_0607700	N/A	kmeans	4	Cyan	273	Protein PFF0380w
36329.C6KST6	PF3D7_0608900	N/A	kmeans	4	Cyan	273	Uncharacterized protein
36329.C6KSW2	PF3D7_0611800	N/A	kmeans	4	Cyan	273	Uncharacterized protein
36329.C6KSX6	PF3D7_0613300	ROP14	kmeans	4	Cyan	273	Rhoptry protein ROP14
36329.C6KSX8	PF3D7_0613600	N/A	kmeans	4	Cyan	273	Uncharacterized protein
36329.C6KSX9	PF3D7_0613700	N/A	kmeans	4	Cyan	273	Syntaxin-binding protein, putative; Belongs to the STXBP/unc-18/SEC1 family.
36329.C6KSY0	PF3D7_0613800	ApiAP2	kmeans	4	Cyan	273	AP2 domain transcription factor, putative
36329.C6KSY4	PF3D7_0614300	MFR1	kmeans	4	Cyan	273	Major facilitator superfamily-related transporter, putative
36329.C6KT49	PF3D7_0621100	N/A	kmeans	4	Cyan	273	Uncharacterized protein
36329.C6KT52	PF3D7_0621400	ALV7	kmeans	4	Cyan	273	Inner membrane complex protein 1j, putative
36329.C6KTD8	PF3D7_0630300	N/A	kmeans	4	Cyan	273	DNA polymerase epsilon catalytic subunit A, putative
36329.C6KTE5	PF3D7_0631000	N/A	kmeans	4	Cyan	273	Tetratricopeptide repeat protein, putative
36329.C6KTF7	PF3D7_0632500	VAR	kmeans	4	Cyan	273	Erythrocyte membrane protein 1, PfEMP1
36329.Q8IBZ9	PF3D7_0709000	CRT	kmeans	4	Cyan	273	Putative chloroquine resistance transporter; May regulate endogenous transporter; Belongs to the CRT-like transporter family.
36329.P62344	PF3D7_0217500	CDPK1	kmeans	4	Cyan	273	Calcium-dependent protein kinase 1; Calcium-dependent kinase which may phosphorylate proteins of the host erythrocyte membranes.
36329.Q8I4S2	PF3D7_1251200	N/A	kmeans	4	Cyan	273	Coronin; Belongs to the WD repeat coronin family.
36329.O77309	PF3D7_0302200	CLAG3.2	kmeans	4	Cyan	273	Cytoadherence linked asexual protein 3.2
36329.O77310	PF3D7_0302500	CLAG3.1	kmeans	4	Cyan	273	Cytoadherence linked asexual protein 3.1
36329.O77313	PF3D7_0303000	NSF	kmeans	4	Cyan	273	N-ethylmaleimide-sensitive fusion protein
36329.O77322	PF3D7_0308100	N/A	kmeans	4	Cyan	273	Zinc finger protein, putative
36329.O77324	PF3D7_0308300	PIC4	kmeans	4	Cyan	273	Uncharacterized protein
36329.O77326	PF3D7_0308700	N/A	kmeans	4	Cyan	273	Uncharacterized protein
36329.O77353	PF3D7_0311300	N/A	kmeans	4	Cyan	273	Phosphatidylinositol 3- and 4-kinase, putative
36329.O77368	PF3D7_0319000	ATPase7	kmeans	4	Cyan	273	P-type ATPase, putative
36329.O77385	PF3D7_0317200	CRK4	kmeans	4	Cyan	273	Cdc2-related protein kinase 4
36329.O77388	PF3D7_0316700	YOP1	kmeans	4	Cyan	273	Protein YOP1, putative
36329.O77389	PF3D7_0316600	FNT	kmeans	4	Cyan	273	Formate-nitrite transporter
36329.O96120	PF3D7_0201500	N/A	kmeans	4	Cyan	273	Uncharacterized protein
36329.O96134	PF3D7_0203100	N/A	kmeans	4	Cyan	273	Protein kinase, putative
36329.O96188	PF3D7_0210600	CERLI1	kmeans	4	Cyan	273	Uncharacterized protein
36329.O96191	PF3D7_0210900	N/A	kmeans	4	Cyan	273	Uncharacterized protein
36329.O96193	PF3D7_0211200	RAB5a	kmeans	4	Cyan	273	Ras-related protein Rab-5A
36329.O96197	PF3D7_0211700	TKL1	kmeans	4	Cyan	273	Tyrosine kinase-like protein, putative
36329.O96221	PF3D7_0214100	SEC31	kmeans	4	Cyan	273	Protein transport protein SEC31
36329.O96279	PF3D7_0220800	CLAG2	kmeans	4	Cyan	273	Cytoadherence linked asexual protein 2
36329.O97225	PF3D7_0303500	N/A	kmeans	4	Cyan	273	Spindle pole body protein, putative
36329.O97229	PF3D7_0304100	IMC1e	kmeans	4	Cyan	273	Inner membrane complex protein 1e, putative
36329.O97271	PF3D7_0315600	N/A	kmeans	4	Cyan	273	Zinc finger protein, putative
36329.O97287	PF3D7_0321100	N/A	kmeans	4	Cyan	273	Uncharacterized protein
36329.O97291	PF3D7_0321700	N/A	kmeans	4	Cyan	273	Uncharacterized protein
36329.O97323	PF3D7_0320100	SEC22	kmeans	4	Cyan	273	Protein transport protein SEC22; Belongs to the synaptobrevin family.
36329.Q8I423	PF3D7_0508000	P38	kmeans	4	Cyan	273	Merozoite surface protein P38
36329.Q6ZMA8	PF3D7_0406100	N/A	kmeans	4	Cyan	273	Vacuolar proton pump subunit B; Non-catalytic subunit of the peripheral V1 complex of vacuolar ATPase; Belongs to the ATPase alpha/beta chains family.
36329.Q7K6A5	PF3D7_0523000	MDR1	kmeans	4	Cyan	273	Multidrug resistance protein 1
36329.Q7KQK0	PF3D7_1223100	PKAr	kmeans	4	Cyan	273	cAMP-dependent protein kinase regulatory subunit
36329.Q7KQK5	PF3D7_1133400	AMA1	kmeans	4	Cyan	273	Apical membrane antigen 1
36329.Q8I0U6	PF3D7_0102200	RESA	kmeans	4	Cyan	273	Ring-infected erythrocyte surface antigen
36329.Q8I0U8	PF3D7_0930300	MSP1	kmeans	4	Cyan	273	Merozoite surface protein 1
36329.Q8I1Q1	PF3D7_0418600	N/A	kmeans	4	Cyan	273	Regulator of chromosome condensation, putative
36329.Q8I1Q2	PF3D7_0418500	BET3	kmeans	4	Cyan	273	Trafficking protein particle complex subunit; May play a role in vesicular transport from endoplasmic reticulum to Golgi.
36329.Q8I1S4	PF3D7_0416300	MCM9	kmeans	4	Cyan	273	DNA helicase MCM9, putative; Belongs to the MCM family.
36329.Q8I205	PF3D7_0402100	N/A	kmeans	4	Cyan	273	PRESAN domain-containing protein
36329.Q8I239	PF3D7_0110600	PIP5K	kmeans	4	Cyan	273	Phosphatidylinositol-4-phosphate 5-kinase
36329.Q8I280	PF3D7_0106100	N/A	kmeans	4	Cyan	273	V-type proton ATPase subunit C; Subunit of the peripheral V1 complex of vacuolar ATPase. Subunit C is necessary for the assembly of the catalytic sector of the enzyme and is likely to have a specific function in its catalytic activity. V-ATPase is responsible for acidifying a variety of intracellular compartments in eukaryotic cells.
36329.Q8I284	PF3D7_0105700	N/A	kmeans	4	Cyan	273	Asparagine-rich antigen Pfa35-2
36329.Q8I285	PF3D7_0105600	N/A	kmeans	4	Cyan	273	FtsJ domain-containing protein
36329.Q8I2G2	PF3D7_0935800	CLAG9	kmeans	4	Cyan	273	Cytoadherence linked asexual protein 9
36329.Q8I2K9	PF3D7_0930500	DGK1	kmeans	4	Cyan	273	Diacylglycerol kinase, putative
36329.Q8I2Q4	PF3D7_0925400	N/A	kmeans	4	Cyan	273	Serine/threonine-protein phosphatase
36329.Q8I2V4	PF3D7_0919900	RCC-PIP	kmeans	4	Cyan	273	Regulator of chromosome condensation-PP1-interacting protein
36329.Q8I2V8	PF3D7_0919500	MFS3	kmeans	4	Cyan	273	Major facilitator superfamily domain-containing protein, putative
36329.Q8I2Z2	PF3D7_0916000	MFS2	kmeans	4	Cyan	273	Major facilitator superfamily domain-containing protein, putative
36329.Q8I390	PF3D7_0905900	SEC27	kmeans	4	Cyan	273	Coatomer subunit beta; The coatomer is a cytosolic protein complex that binds to dilysine motifs and reversibly associates with Golgi non-clathrin- coated vesicles, which further mediate biosynthetic protein transport from the ER, via the Golgi up to the trans Golgi network. Coatomer complex is required for budding from Golgi membranes, and is essential for the retrograde Golgi-to-ER transport of…
36329.Q8I395	PF3D7_0905400	RhopH3	kmeans	4	Cyan	273	High molecular weight rhoptry protein 3
36329.Q8I3F7	PF3D7_0531100	N/A	kmeans	4	Cyan	273	Uncharacterized protein
36329.Q8I3F9	PF3D7_0530900	FRM1	kmeans	4	Cyan	273	Formin 1
36329.Q8I3I3	PF3D7_0528400	DHHC7	kmeans	4	Cyan	273	Palmitoyltransferase; Belongs to the DHHC palmitoyltransferase family.
36329.Q8I3K7	PF3D7_0525800	IMC1g	kmeans	4	Cyan	273	Inner membrane complex protein 1g, putative
36329.Q8I3N4	PF3D7_0522900	N/A	kmeans	4	Cyan	273	Zinc finger protein, putative
36329.Q8I3N7	PF3D7_0522600	N/A	kmeans	4	Cyan	273	Inner membrane complex protein
36329.Q8I3U0	PF3D7_0516800	ApiAP2	kmeans	4	Cyan	273	AP2 domain transcription factor AP2-O2, putative
36329.Q8I3V1	PF3D7_0515700	GAP40	kmeans	4	Cyan	273	Glideosome-associated protein 40, putative
36329.Q8I3V5	PF3D7_0515300	PI3K	kmeans	4	Cyan	273	Phosphatidylinositol 3-kinase
36329.Q8I3W6	PF3D7_0514100	UvrD	kmeans	4	Cyan	273	ATP-dependent DNA helicase UvrD
36329.Q8I3Z1	PF3D7_0511500	N/A	kmeans	4	Cyan	273	MATH and LRR domain-containing protein PFE0570w
36329.Q8I406	PF3D7_0509800	PI4KB	kmeans	4	Cyan	273	Phosphatidylinositol 4-kinase; Belongs to the PI3/PI4-kinase family.
36329.Q8I414	PF3D7_0508900	AAP6	kmeans	4	Cyan	273	Uncharacterized protein
36329.Q8I433	PF3D7_0506900	ROM4	kmeans	4	Cyan	273	RHOMBOID-like protein
36329.Q8I469	PF3D7_0503200	CDC6	kmeans	4	Cyan	273	ATPase_AAA_core domain-containing protein
36329.Q8I480	PF3D7_0502000	VPS11	kmeans	4	Cyan	273	RING finger protein PFE0100w
36329.Q8I484	PF3D7_0501600	RAP2	kmeans	4	Cyan	273	Rhoptry-associated protein 2
36329.Q8I4R5	PF3D7_1252100	RON3	kmeans	4	Cyan	273	Rhoptry neck protein 3
36329.Q8I4S6	PF3D7_1250800	N/A	kmeans	4	Cyan	273	DNA repair protein rhp16, putative
36329.Q8I4V7	PF3D7_1247500	N/A	kmeans	4	Cyan	273	Serine/threonine protein kinase, putative
36329.Q8I4W8	PF3D7_1246400	MTIP	kmeans	4	Cyan	273	Myosin A tail domain interacting protein
36329.Q8I525	PF3D7_1239800	N/A	kmeans	4	Cyan	273	Uncharacterized protein
36329.Q8I531	PF3D7_1239200	ApiAP2	kmeans	4	Cyan	273	AP2 domain transcription factor, putative
36329.Q8I570	PF3D7_1235200	VP2	kmeans	4	Cyan	273	V-type K+-independent H+-translocating inorganic pyrophosphatase
36329.Q8I5D4	PF3D7_1228400	N/A	kmeans	4	Cyan	273	Uncharacterized protein
36329.Q8I5D5	PF3D7_1228300	NEK1	kmeans	4	Cyan	273	NIMA related kinase 1
36329.Q8I5E3	PF3D7_1227500	SOC2	kmeans	4	Cyan	273	Protein SOC2, putative
36329.Q8I5G0	PF3D7_1225700	N/A	kmeans	4	Cyan	273	VAC14 domain-containing protein, putative
36329.Q8I5H6	PF3D7_1224100	N/A	kmeans	4	Cyan	273	Uncharacterized protein
36329.Q8I5I8	PF3D7_1222700	GAP45	kmeans	4	Cyan	273	Glideosome-associated protein 45
36329.Q8I5K0	PF3D7_1221300	N/A	kmeans	4	Cyan	273	Uncharacterized protein
36329.Q8I5L6	PF3D7_1219100	CHC	kmeans	4	Cyan	273	Clathrin heavy chain; Clathrin is the major protein of the polyhedral coat of coated pits and vesicles; Belongs to the clathrin heavy chain family.
36329.Q8I5M5	PF3D7_1218300	AP2-MU	kmeans	4	Cyan	273	AP-2 complex subunit mu, putative; Belongs to the adaptor complexes medium subunit family.
36329.Q8I5S7	PF3D7_1212500	GAT	kmeans	4	Cyan	273	Glycerol-3-phosphate 1-O-acyltransferase
36329.Q8I6T3	PF3D7_1328100	N/A	kmeans	4	Cyan	273	Proteasome subunit beta; The proteasome is a multicatalytic proteinase complex which is characterized by its ability to cleave peptides with Arg, Phe, Tyr, Leu, and Glu adjacent to the leaving group at neutral or slightly basic pH; Belongs to the peptidase T1B family.
36329.Q8I6V3	PF3D7_1408000	PMII	kmeans	4	Cyan	273	Plasmepsin II; Belongs to the peptidase A1 family.
36329.Q8IAM0	PF3D7_0802000	GDH3	kmeans	4	Cyan	273	Glutamate dehydrogenase, putative
36329.Q8IAM1	PF3D7_0802100	AP2-LT	kmeans	4	Cyan	273	AP2 domain transcription factor, putative
36329.Q8IAN4	PF3D7_0803400	RAD54	kmeans	4	Cyan	273	DNA repair and recombination protein RAD54, putative
36329.Q8IAQ8	PF3D7_0806800	N/A	kmeans	4	Cyan	273	V-type proton ATPase subunit a, putative
36329.Q8IAV6	PF3D7_0812100	N/A	kmeans	4	Cyan	273	Proteasome activator complex subunit 4, putative
36329.Q8IAY2	PF3D7_0814500	N/A	kmeans	4	Cyan	273	Uncharacterized protein
36329.Q8IB16	PF3D7_0818100	N/A	kmeans	4	Cyan	273	Zinc finger protein, putative
36329.Q8IB44	PF3D7_0821000	N/A	kmeans	4	Cyan	273	Uncharacterized protein
36329.Q8IB63	PF3D7_0822900	PIC2	kmeans	4	Cyan	273	Uncharacterized protein
36329.Q8IB64	PF3D7_0823000	VPS15	kmeans	4	Cyan	273	Serine/threonine protein kinase VPS15, putative
36329.Q8IBF4	PF3D7_0730500	N/A	kmeans	4	Cyan	273	Uncharacterized protein
36329.Q8IBH6	PF3D7_0728100	N/A	kmeans	4	Cyan	273	Anaphase-promoting complex subunit 1, putative
36329.Q8IBK1	PF3D7_0725000	N/A	kmeans	4	Cyan	273	Exonuclease I, putative
36329.Q8IBL5	PF3D7_0723800	N/A	kmeans	4	Cyan	273	Uncharacterized protein
36329.Q8IBN1	PF3D7_0722200	RALP1	kmeans	4	Cyan	273	Rhoptry-associated leucine zipper-like protein 1
36329.Q8IBU8	PF3D7_0715200	N/A	kmeans	4	Cyan	273	Uncharacterized protein
36329.Q8IC15	PF3D7_0705500	N/A	kmeans	4	Cyan	273	Inositol-phosphate phosphatase, putative
36329.Q8IC22	PF3D7_0704800	PPM12	kmeans	4	Cyan	273	Protein phosphatase PPM12, putative
36329.Q8ID22	PF3D7_1368800	ERCC4	kmeans	4	Cyan	273	DNA repair endonuclease XPF, putative
36329.Q8ID94	PF3D7_1361200	N/A	kmeans	4	Cyan	273	Uncharacterized protein MAL13P1.304
36329.Q8IDD4	PF3D7_1356800	ARK3	kmeans	4	Cyan	273	Serine/threonine protein kinase, putative
36329.Q8IDE1	PF3D7_1356100	N/A	kmeans	4	Cyan	273	Uncharacterized protein
36329.Q8IDG3	PF3D7_1353800	N/A	kmeans	4	Cyan	273	Proteasome subunit alpha type
36329.Q8IDQ5	PF3D7_1343400	RAD5	kmeans	4	Cyan	273	DNA repair protein RAD5, putative
36329.Q8IDQ8	PF3D7_1343100	N/A	kmeans	4	Cyan	273	Uncharacterized protein
36329.Q8IDX8	PF3D7_1335100	MSP7	kmeans	4	Cyan	273	Merozoite surface protein 7
36329.Q8IE65	PF3D7_1325400	N/A	kmeans	4	Cyan	273	Uncharacterized protein
36329.Q8IEA7	PF3D7_1320700	N/A	kmeans	4	Cyan	273	Uncharacterized protein
36329.Q8IEC9	PF3D7_1318700	AAP4	kmeans	4	Cyan	273	Uncharacterized protein
36329.Q8IEE5	PF3D7_1317100	MCM4	kmeans	4	Cyan	273	DNA replication licensing factor MCM4; Belongs to the MCM family.
36329.Q8IEH2	PF3D7_1314200	TERT	kmeans	4	Cyan	273	Telomerase reverse transcriptase; Telomerase is a ribonucleoprotein enzyme essential for the replication of chromosome termini in most eukaryotes. It elongates telomeres. It is a reverse transcriptase that adds simple sequence repeats to chromosome ends by copying a template sequence within the RNA component of the enzyme.
36329.Q8IEH7	PF3D7_1313600	N/A	kmeans	4	Cyan	273	Clu domain-containing protein
36329.Q8IEK3	PF3D7_1311500	RPT1	kmeans	4	Cyan	273	26S protease regulatory subunit 7, putative; Belongs to the AAA ATPase family.
36329.Q8IEK9	PF3D7_1310700	PIC5	kmeans	4	Cyan	273	RNA-binding protein, putative
36329.Q8IFN1	PF3D7_0423500	GAPM2	kmeans	4	Cyan	273	Glideosome associated protein with multiple membrane spans 2
36329.Q8IFP1	PF3D7_0422500	BRR2	kmeans	4	Cyan	273	Pre-mRNA-splicing helicase BRR2, putative
36329.Q8IHN1	PF3D7_1149200	RESA3	kmeans	4	Cyan	273	Ring-infected erythrocyte surface antigen
36329.Q8IHR5	PF3D7_1145200	N/A	kmeans	4	Cyan	273	Serine/threonine protein kinase, putative
36329.Q8IHT5	PF3D7_1143100	AP2-O	kmeans	4	Cyan	273	AP2 domain transcription factor AP2-O, putative
36329.Q8IHV9	PF3D7_1140600	N/A	kmeans	4	Cyan	273	Uncharacterized protein
36329.Q8IHW1	PF3D7_1140400	N/A	kmeans	4	Cyan	273	Uncharacterized protein
36329.Q8IHY1	PF3D7_1138400	GCalpha	kmeans	4	Cyan	273	Guanylyl cyclase
36329.Q8IHY4	PF3D7_1138000	N/A	kmeans	4	Cyan	273	Uncharacterized protein
36329.Q8II70	PF3D7_1129300	N/A	kmeans	4	Cyan	273	Uncharacterized protein
36329.Q8II71	PF3D7_1129200	RPN7	kmeans	4	Cyan	273	26S proteasome regulatory subunit RPN7, putative
36329.Q8II92	PF3D7_1127100	dUTPase	kmeans	4	Cyan	273	Deoxyuridine 5'-triphosphate nucleotidohydrolase
36329.Q8II97	PF3D7_1126700	ATG23	kmeans	4	Cyan	273	Autophagy-related protein 23, putative
36329.Q8IIB7	PF3D7_1124600	EK	kmeans	4	Cyan	273	Ethanolamine kinase
36329.Q8IIF4	PF3D7_1121300	TKL2	kmeans	4	Cyan	273	Tyrosine kinase-like protein
36329.Q8IIH7	PF3D7_1119000	N/A	kmeans	4	Cyan	273	Acyl-CoA-binding protein, putative
36329.Q8IIK5	PF3D7_1116000	RON4	kmeans	4	Cyan	273	Rhoptry neck protein 4
36329.Q8IIL3	PF3D7_1114900	N/A	kmeans	4	Cyan	273	Uncharacterized protein
36329.Q8IIN2	PF3D7_1113000	N/A	kmeans	4	Cyan	273	Uncharacterized protein
36329.Q8IIP2	PF3D7_1112100	N/A	kmeans	4	Cyan	273	Protein kinase domain-containing protein
36329.Q8IIS8	PF3D7_1107400	RAD51	kmeans	4	Cyan	273	DNA repair protein RAD51 homolog; Binds to single and double-stranded DNA and exhibits DNA- dependent ATPase activity. Underwinds duplex DNA. ; Belongs to the RecA family. RAD51 subfamily.
36329.Q8IIV3	PF3D7_1104900	N/A	kmeans	4	Cyan	273	Calcium/calmodulin-dependent protein kinase, putative
36329.Q8IJ32	PF3D7_1037500	DYN2	kmeans	4	Cyan	273	Dynamin-like protein; Belongs to the TRAFAC class dynamin-like GTPase superfamily. Dynamin/Fzo/YdjA family.
36329.Q8IJ49	PF3D7_1035900	MAAP	kmeans	4	Cyan	273	PUM-HD domain-containing protein
36329.Q8IJ56	PF3D7_1035300	GLURP	kmeans	4	Cyan	273	Glutamate-rich protein GLURP
36329.Q8IJA3	PF3D7_1030200	CLAMP	kmeans	4	Cyan	273	Claudin-like apicomplexan microneme protein, putative
36329.Q8IJA6	PF3D7_1029900	N/A	kmeans	4	Cyan	273	Uncharacterized protein
36329.Q8IJF4	PF3D7_1025000	EPS15	kmeans	4	Cyan	273	EF-hand calcium-binding domain-containing protein, putative
36329.Q8IJK2	PF3D7_1019900	ATG8	kmeans	4	Cyan	273	Autophagy-related protein; Belongs to the ATG8 family.
36329.Q8IJK6	PF3D7_1019600	N/A	kmeans	4	Cyan	273	PH domain-containing protein
36329.Q8IJL1	PF3D7_1019100	N/A	kmeans	4	Cyan	273	Uncharacterized protein
36329.Q8IJM0	PF3D7_1017900	RPN5	kmeans	4	Cyan	273	26S proteasome regulatory subunit p55, putative
36329.Q8IJP6	PF3D7_1014900	KIC8	kmeans	4	Cyan	273	Uncharacterized protein
36329.Q8IJR0	PF3D7_1013500	PI-PLC	kmeans	4	Cyan	273	Phosphoinositide phospholipase C
36329.Q8IJT1	PF3D7_1011400	N/A	kmeans	4	Cyan	273	Proteasome subunit beta; The proteasome is a multicatalytic proteinase complex which is characterized by its ability to cleave peptides with Arg, Phe, Tyr, Leu, and Glu adjacent to the leaving group at neutral or slightly basic pH; Belongs to the peptidase T1B family.
36329.Q8IK01	PF3D7_1003600	IMC1c	kmeans	4	Cyan	273	Inner membrane complex protein 1c, putative
36329.Q8IK06	PF3D7_1003000	N/A	kmeans	4	Cyan	273	Uncharacterized protein
36329.Q8IKC5	PF3D7_1471400	N/A	kmeans	4	Cyan	273	Diacylglycerol kinase
36329.Q8IKD7	PF3D7_1470100	N/A	kmeans	4	Cyan	273	Uncharacterized protein
36329.Q8IKJ0	PF3D7_1464700	N/A	kmeans	4	Cyan	273	V-type proton ATPase subunit; Subunit of the integral membrane V0 complex of vacuolar ATPase. Vacuolar ATPase is responsible for acidifying a variety of intracellular compartments in eukaryotic cells, thus providing most of the energy required for transport processes in the vacuolar system. ; Belongs to the V-ATPase V0D/AC39 subunit family.
36329.Q8IKL8	PF3D7_1461400	N/A	kmeans	4	Cyan	273	MORN repeat protein, putative
36329.Q8IKM6	PF3D7_1460600	ISP3	kmeans	4	Cyan	273	Inner membrane complex sub-compartment protein 3
36329.Q8IKM7	PF3D7_1460500	N/A	kmeans	4	Cyan	273	Uncharacterized protein
36329.Q8IKN0	PF3D7_1460100	FCP	kmeans	4	Cyan	273	FYVE and coiled-coil domain-containing protein
36329.Q8IKS5	PF3D7_1455300	N/A	kmeans	4	Cyan	273	Uncharacterized protein
36329.Q8IKV6	PF3D7_1452000	RON2	kmeans	4	Cyan	273	Rhoptry neck protein 2
36329.Q8IKY8	PF3D7_1448500	N/A	kmeans	4	Cyan	273	DNMT1-RFD domain-containing protein
36329.Q8IL41	PF3D7_1443000	SRPK2	kmeans	4	Cyan	273	Serine/threonine protein kinase
36329.Q8IL63	PF3D7_1440700	AP3M	kmeans	4	Cyan	273	AP-3 complex subunit mu, putative; Belongs to the adaptor complexes medium subunit family.
36329.Q8IL69	PF3D7_1440100	N/A	kmeans	4	Cyan	273	Rad21_Rec8_N domain-containing protein
36329.Q8IL94	PF3D7_1437200	N/A	kmeans	4	Cyan	273	Ribonucleoside-diphosphate reductase; Provides the precursors necessary for DNA synthesis. Catalyzes the biosynthesis of deoxyribonucleotides from the corresponding ribonucleotides.
36329.Q8ILA2	PF3D7_1436200	BCP1	kmeans	4	Cyan	273	Basal complex protein BCP1
36329.Q8ILA8	PF3D7_1435600	N/A	kmeans	4	Cyan	273	Uncharacterized protein
36329.Q8ILB1	PF3D7_1435300	N/A	kmeans	4	Cyan	273	Glutamate synthase [NADH], putative
36329.Q8ILG1	PF3D7_1430300	N/A	kmeans	4	Cyan	273	Acid phosphatase, putative; Belongs to the histidine acid phosphatase family.
36329.Q8ILL9	PF3D7_1423300	PP7	kmeans	4	Cyan	273	Serine/threonine-protein phosphatase
36329.Q8ILS3	PF3D7_1417300	ATG4	kmeans	4	Cyan	273	Cysteine protease ATG4, putative
36329.Q8ILX0	PF3D7_1412400	N/A	kmeans	4	Cyan	273	Uncharacterized protein
36329.Q8ILZ1	PF3D7_1410400	RAP1	kmeans	4	Cyan	273	Rhoptry-associated protein 1
36329.Q8IM01	PF3D7_1409400	N/A	kmeans	4	Cyan	273	Uncharacterized protein
36329.Q8IM26	PF3D7_1406800	GAPM3	kmeans	4	Cyan	273	Glideosome associated protein with multiple membrane spans 3
36329.Q9TY98	PF3D7_0204100	N/A	kmeans	4	Cyan	273	Sel1 repeat-containing protein, putative
36329.Q9TY99	PF3D7_0202000	KAHRP	kmeans	4	Cyan	273	Knob-associated histidine-rich protein
36329.Q9U0H1	PF3D7_0411900	N/A	kmeans	4	Cyan	273	DNA polymerase
36329.Q9U0K9	PF3D7_0407700	N/A	kmeans	4	Cyan	273	Uncharacterized protein
36329.Q9U0N4	PF3D7_0112200	MRP1	kmeans	4	Cyan	273	Multidrug resistance-associated protein 1
36329.Q9TY95	PF3D7_0207600	SERA5	kmeans	4	Cyan	273	Serine-repeat antigen protein; It may function at the red blood cell membrane, perhaps as a component that influences the invasion process; Belongs to the peptidase C1 family.
36329.Q8IKV1	PF3D7_1452500	STX6	kmeans	4	Cyan	273	Syntaxin-6, putative
36329.Q76NM6	PF3D7_1311900	vapA	kmeans	4	Cyan	273	V-type proton ATPase catalytic subunit A; Catalytic subunit of the peripheral V1 complex of vacuolar ATPase. V-ATPase vacuolar ATPase is responsible for acidifying a variety of intracellular compartments in eukaryotic cells; Belongs to the ATPase alpha/beta chains family.
36329.A0A143ZY29	PF3D7_1005500	UPF1	kmeans	5	Blue	239	Regulator of nonsense transcripts 1, putative
36329.A0A143ZY62	PF3D7_0703900	N/A	kmeans	5	Blue	239	Uncharacterized protein
36329.A0A143ZYU5	PF3D7_1124200	N/A	kmeans	5	Blue	239	Thioredoxin-like protein, putative
36329.A0A143ZZK9	PF3D7_1211900	ATP4	kmeans	5	Blue	239	Non-SERCA-type Ca2+ -transporting P-ATPase; Belongs to the cation transport ATPase (P-type) (TC 3.A.3) family.
36329.A0A143ZZU2	PF3D7_1021400	N/A	kmeans	5	Blue	239	Transmembrane 9 superfamily member; Belongs to the nonaspanin (TM9SF) (TC 9.A.2) family.
36329.A0A144A0J9	PF3D7_1202600	NEMF	kmeans	5	Blue	239	Uncharacterized protein
36329.A0A144A0W9	PF3D7_1402700	SR140	kmeans	5	Blue	239	U2 snRNP-associated SURP motif-containing protein, putative
36329.A0A144A125	PF3D7_1223500	N/A	kmeans	5	Blue	239	Uncharacterized protein
36329.A0A144A1F1	PF3D7_1217200	MRD1	kmeans	5	Blue	239	Multiple RNA-binding domain-containing protein 1, putative
36329.A0A144A2S8	PF3D7_1235900	XAB2	kmeans	5	Blue	239	Pre-mRNA-splicing factor SYF1, putative
36329.A0A5K1K7X4	PF3D7_0532100	ETRAMP5	kmeans	5	Blue	239	Early transcribed membrane protein 5
36329.A0A5K1K8J8	PF3D7_1344900	N/A	kmeans	5	Blue	239	Uncharacterized protein
36329.A0A5K1K8J9	PF3D7_1331500	N/A	kmeans	5	Blue	239	Uncharacterized protein
36329.A0A5K1K8K0	PF3D7_0525500	N/A	kmeans	5	Blue	239	WD repeat-containing protein, putative
36329.A0A5K1K8N6	PF3D7_1357400	N/A	kmeans	5	Blue	239	Uncharacterized protein
36329.A0A5K1K8X7	PF3D7_1369500	N/A	kmeans	5	Blue	239	Uncharacterized protein
36329.A0A5K1K903	PF3D7_1357700	UTP21	kmeans	5	Blue	239	U3 small nucleolar RNA-associated protein 21, putative
36329.A0A5K1K9G1	PF3D7_1360700	PIAS	kmeans	5	Blue	239	E3 SUMO-protein ligase PIAS, putative
36329.A0A5K1K9G3	PF3D7_1364000	N/A	kmeans	5	Blue	239	Uncharacterized protein
36329.C0H4A9	PF3D7_0416900	N/A	kmeans	5	Blue	239	Uncharacterized protein
36329.C0H4C4	PF3D7_0504800	N/A	kmeans	5	Blue	239	Uncharacterized protein
36329.C0H4C6	PF3D7_0505000	N/A	kmeans	5	Blue	239	MMS19-like protein, putative
36329.C0H4K6	PF3D7_0704600	UT	kmeans	5	Blue	239	E3 ubiquitin-protein ligase
36329.C0H4Q1	PF3D7_0729100	N/A	kmeans	5	Blue	239	Uncharacterized protein
36329.C0H4Q4	PF3D7_0731800	GEXP08	kmeans	5	Blue	239	Alpha/beta hydrolase, putative
36329.C0H4X5	PF3D7_0824600	DRE2	kmeans	5	Blue	239	Anamorsin homolog; Component of the cytosolic iron-sulfur (Fe-S) protein assembly (CIA) machinery. Required for the maturation of extramitochondrial Fe-S proteins. Part of an electron transfer chain functioning in an early step of cytosolic Fe-S biogenesis, facilitating the de novo assembly of a [4Fe-4S] cluster on the cytosolic Fe-S scaffold complex. Electrons are transferred from NADPH via a FA…
36329.C0H4X7	PF3D7_0825000	N/A	kmeans	5	Blue	239	Uncharacterized protein
36329.C0H4Y0	PF3D7_0826500	UBE4B	kmeans	5	Blue	239	Ubiquitin conjugation factor E4 B, putative
36329.C0H4Y4	PF3D7_0801700	SENP2	kmeans	5	Blue	239	Sentrin-specific protease 2, putative
36329.C0H4Z0	PF3D7_0829400	N/A	kmeans	5	Blue	239	Prolyl 4-hydroxylase subunit alpha, putative
36329.C0H577	PF3D7_0930800	N/A	kmeans	5	Blue	239	Uncharacterized protein
36329.C0H591	PF3D7_0935500	GEXP22	kmeans	5	Blue	239	Uncharacterized protein
36329.C0H5A0	PF3D7_1305300	GCN1	kmeans	5	Blue	239	Translational activator GCN1, putative
36329.C0H5A2	PF3D7_1306300	N/A	kmeans	5	Blue	239	SAM dependent methyltransferase, putative; Belongs to the class I-like SAM-binding methyltransferase superfamily. RNA M5U methyltransferase family.
36329.C0H5A6	PF3D7_1308400	N/A	kmeans	5	Blue	239	Uncharacterized protein
36329.C0H5B3	PF3D7_1313800	N/A	kmeans	5	Blue	239	Uncharacterized protein
36329.C0H5H6	PF3D7_1346400	N/A	kmeans	5	Blue	239	VPS13 domain-containing protein, putative
36329.C6KSM1	PF3D7_0602100	MTR4	kmeans	5	Blue	239	ATP-dependent RNA helicase, putative
36329.C6KSM9	PF3D7_0602900	N/A	kmeans	5	Blue	239	Uncharacterized protein
36329.C6KSN0	PF3D7_0603000	N/A	kmeans	5	Blue	239	Sde2_N_Ubi domain-containing protein
36329.C6KSN4	PF3D7_0603600	N/A	kmeans	5	Blue	239	AT-rich interactive domain-containing protein, putative
36329.C6KSN7	PF3D7_0603900	N/A	kmeans	5	Blue	239	Uncharacterized protein
36329.C6KSU4	PF3D7_0609700	KIC6	kmeans	5	Blue	239	Uncharacterized protein
36329.C6KSU6	PF3D7_0609900	N/A	kmeans	5	Blue	239	Uncharacterized protein
36329.C6KSU9	PF3D7_0610200	RBM25	kmeans	5	Blue	239	RNA-binding protein 25, putative
36329.C6KSY3	PF3D7_0614200	NAR1	kmeans	5	Blue	239	Cytosolic Fe-S cluster assembly factor NAR1, putative; Belongs to the NARF family.
36329.C6KT13	PF3D7_0617200	N/A	kmeans	5	Blue	239	Uncharacterized protein
36329.C6KT20	PF3D7_0618000	N/A	kmeans	5	Blue	239	Uncharacterized protein
36329.C6KT45	PF3D7_0620500	N/A	kmeans	5	Blue	239	Cleavage stimulation factor subunit 1, putative
36329.C6KT72	PF3D7_0623600	N/A	kmeans	5	Blue	239	Transcription or splicing factor-like protein, putative
36329.C6KTA0	PF3D7_0626400	N/A	kmeans	5	Blue	239	CRAL/TRIO domain-containing protein, putative
36329.C6KTD3	PF3D7_0629800	N/A	kmeans	5	Blue	239	Cullin-like protein, putative; Belongs to the cullin family. ProRule:PRU00330, ECO:0000256|RuleBase:RU003829,
36329.C6KTE4	PF3D7_0630900	HAS1	kmeans	5	Blue	239	RNA helicase
36329.C6S3H8	PF3D7_1418900	DBP4	kmeans	5	Blue	239	ATP-dependent RNA helicase DBP4, putative; Belongs to the DEAD box helicase family.
36329.Q8IC16	PF3D7_0705400	MCM7	kmeans	5	Blue	239	DNA replication licensing factor MCM7; Acts as component of the mcm2-7 complex (mcm complex) which is the putative replicative helicase essential for 'once per cell cycle' DNA replication initiation and elongation in eukaryotic cells. The active ATPase sites in the mcm2-7 ring are formed through the interaction surfaces of two neighboring subunits such that a critical structure of a conserved arg…
36329.O77314	PF3D7_0303100	N/A	kmeans	5	Blue	239	CLP1 P-loop domain-containing protein, putative
36329.O77327	PF3D7_0308900	SF3B1	kmeans	5	Blue	239	Splicing factor 3B subunit 1, putative
36329.O77336	PF3D7_0310200	N/A	kmeans	5	Blue	239	Phd finger protein, putative
36329.O77360	PF3D7_0310500	DHX57	kmeans	5	Blue	239	ATP-dependent RNA helicase DHX57, putative
36329.O77363	PF3D7_0313000	N/A	kmeans	5	Blue	239	Uncharacterized protein
36329.O77375	PF3D7_0318200	RPB1	kmeans	5	Blue	239	DNA-directed RNA polymerase subunit; DNA-dependent RNA polymerase catalyzes the transcription of DNA into RNA using the four ribonucleoside triphosphates as substrates.
36329.O77380	PF3D7_0317700	N/A	kmeans	5	Blue	239	CPSF (Cleavage and polyadenylation specific factor), subunit A, putative
36329.O96122	PF3D7_0201700	N/A	kmeans	5	Blue	239	DnaJ protein, putative
36329.O96125	PF3D7_0202100	LSAP2	kmeans	5	Blue	239	Liver stage associated protein 2
36329.O96133	PF3D7_0203000	ROPE	kmeans	5	Blue	239	Uncharacterized protein PFB0145c
36329.O96217	PF3D7_0213700	N/A	kmeans	5	Blue	239	Uncharacterized protein
36329.O96236	PF3D7_0215700	RPB2	kmeans	5	Blue	239	DNA-directed RNA polymerase subunit beta; DNA-dependent RNA polymerase catalyzes the transcription of DNA into RNA using the four ribonucleoside triphosphates as substrates.
36329.O96265	PF3D7_0218500	SNRPD2	kmeans	5	Blue	239	Small nuclear ribonucleoprotein Sm D2
36329.O97240	PF3D7_0305600	APE1	kmeans	5	Blue	239	DNA-(apurinic or apyrimidinic site) lyase; Belongs to the DNA repair enzymes AP/ExoA family.
36329.O97277	PF3D7_0319400	N/A	kmeans	5	Blue	239	Kinesin-8, putative; Belongs to the TRAFAC class myosin-kinesin ATPase superfamily. Kinesin family.
36329.O97278	PF3D7_0319700	ABCI3	kmeans	5	Blue	239	ABC transporter I family member 1, putative
36329.O97285	PF3D7_0320800	DOZI	kmeans	5	Blue	239	ATP-dependent RNA helicase DDX6; Belongs to the DEAD box helicase family.
36329.O97286	PF3D7_0321000	N/A	kmeans	5	Blue	239	Uncharacterized protein
36329.O97290	PF3D7_0321600	DDX42	kmeans	5	Blue	239	ATP-dependent RNA helicase DDX42, putative
36329.O97292	PF3D7_0321800	N/A	kmeans	5	Blue	239	WD repeat-containing protein, putative
36329.O97334	PF3D7_0302000	PRP46	kmeans	5	Blue	239	Pre-mRNA-splicing factor PRP46, putative
36329.P61074	PF3D7_1361900	PCNA1	kmeans	5	Blue	239	Proliferating cell nuclear antigen; This protein is an auxiliary protein of DNA polymerase delta and is involved in the control of eukaryotic DNA replication by increasing the polymerase's processibility during elongation of the leading strand.
36329.B3FEM7	PF3D7_1321600	PDEgamma	kmeans	5	Blue	239	Phosphodiesterase
36329.Q7KQJ9	PF3D7_1226600	PCNA2	kmeans	5	Blue	239	Proliferating cell nuclear antigen; This protein is an auxiliary protein of DNA polymerase delta and is involved in the control of eukaryotic DNA replication by increasing the polymerase's processibility during elongation of the leading strand; Belongs to the PCNA family.
36329.Q7KQL1	PF3D7_1033600	CEF1	kmeans	5	Blue	239	Pre-mRNA-splicing factor CEF1, putative
36329.Q8I0W1	PF3D7_0933000	N/A	kmeans	5	Blue	239	CSTF domain-containing protein, putative
36329.Q8I1Q4	PF3D7_0418300	N/A	kmeans	5	Blue	239	Uncharacterized protein
36329.Q8I1Q6	PF3D7_0418100	SOC1	kmeans	5	Blue	239	Protein SOC1, putative
36329.Q8I1S9	PF3D7_0415800	N/A	kmeans	5	Blue	239	RING zinc finger protein, putative
36329.Q8I1T4	PF3D7_0415300	CRK3	kmeans	5	Blue	239	Cdc2-related protein kinase 3
36329.Q8I1T6	PF3D7_0415200	N/A	kmeans	5	Blue	239	Uncharacterized protein
36329.Q8I1U2	PF3D7_0414600	APH	kmeans	5	Blue	239	Acylated pleckstrin-homology domain-containing protein, putative
36329.Q8I1X3	PF3D7_0405600	N/A	kmeans	5	Blue	239	TMEM33 domain-containing protein, putative
36329.Q8I1X5	PF3D7_0405400	PRPF8	kmeans	5	Blue	239	Pre-mRNA-processing-splicing factor 8, putative
36329.Q8I1Y3	PF3D7_0404600	N/A	kmeans	5	Blue	239	Uncharacterized protein
36329.Q8I230	PF3D7_0111600	N/A	kmeans	5	Blue	239	Uncharacterized protein
36329.Q8I235	PF3D7_0111000	N/A	kmeans	5	Blue	239	Kinesin-8, putative; Belongs to the TRAFAC class myosin-kinesin ATPase superfamily. Kinesin family.
36329.Q8I241	PF3D7_0110400	RPB9	kmeans	5	Blue	239	DNA-directed RNA polymerase II subunit RPB9, putative
36329.Q8I2F2	PF3D7_0936800	N/A	kmeans	5	Blue	239	PRESAN domain-containing protein
36329.Q8I2H7	PF3D7_0934100	XPD	kmeans	5	Blue	239	TFIIH basal transcription factor complex helicase XPD subunit
36329.Q8I2P8	PF3D7_0926100	N/A	kmeans	5	Blue	239	Protein kinase, putative
36329.Q8I2Q1	PF3D7_0925800	UPF2	kmeans	5	Blue	239	Armadillo repeat protein, putative
36329.Q8I2R6	PF3D7_0924100	N/A	kmeans	5	Blue	239	Uncharacterized protein
36329.Q8I2S6	PF3D7_0923000	RPB3	kmeans	5	Blue	239	DNA-directed RNA polymerase II subunit RPB3, putative
36329.Q8I2S7	PF3D7_0922900	FabG	kmeans	5	Blue	239	3-oxoacyl-[acyl-carrier-protein] reductase
36329.Q8I2S9	PF3D7_0922700	PRP18	kmeans	5	Blue	239	Pre-mRNA-splicing factor 18, putative
36329.Q8I2X7	PF3D7_0917600	PRP43	kmeans	5	Blue	239	Pre-mRNA-splicing factor ATP-dependent RNA helicase PRP43, putative
36329.Q8I362	PF3D7_0909000	N/A	kmeans	5	Blue	239	Uncharacterized protein
36329.Q8I379	PF3D7_0907200	N/A	kmeans	5	Blue	239	GTPase-activating protein, putative
36329.Q8I396	PF3D7_0905300	N/A	kmeans	5	Blue	239	Dynein heavy chain, putative
36329.Q8I3A1	PF3D7_0904800	RPA1	kmeans	5	Blue	239	Replication protein A1, small
36329.Q8I3I0	PF3D7_0528700	CYP23	kmeans	5	Blue	239	Peptidyl-prolyl cis-trans isomerase; PPIases accelerate the folding of proteins. It catalyzes the cis-trans isomerization of proline imidic peptide bonds in oligopeptides; Belongs to the cyclophilin-type PPIase family.
36329.Q8I3L7	PF3D7_0524800	UFD1	kmeans	5	Blue	239	Ubiquitin fusion degradation protein 1, putative
36329.Q8I3T4	PF3D7_0517400	FACT-L	kmeans	5	Blue	239	FACT complex subunit SPT16, putative
36329.Q8I3V9	PF3D7_0514900	N/A	kmeans	5	Blue	239	Uncharacterized protein
36329.Q8I3X5	PF3D7_0513200	N/A	kmeans	5	Blue	239	CPSF_A domain-containing protein
36329.Q8I3Y3	PF3D7_0512300	MAT1	kmeans	5	Blue	239	CDK-activating kinase assembly factor MAT1
36329.Q8I3Z3	PF3D7_0511300	N/A	kmeans	5	Blue	239	MORN repeat protein, putative
36329.Q8I3Z9	PF3D7_0510500	TopoI	kmeans	5	Blue	239	Topoisomerase I
36329.Q8I402	PF3D7_0510200	CYP87	kmeans	5	Blue	239	Peptidyl-prolyl cis-trans isomerase
36329.Q8I410	PF3D7_0509400	RNAPI	kmeans	5	Blue	239	DNA-directed RNA polymerase subunit; DNA-dependent RNA polymerase catalyzes the transcription of DNA into RNA using the four ribonucleoside triphosphates as substrates.
36329.Q8I416	PF3D7_0508700	PRP5	kmeans	5	Blue	239	Pre-mRNA-processing ATP-dependent RNA helicase PRP5, putative
36329.Q8I426	PF3D7_0507700	NPL4	kmeans	5	Blue	239	Nuclear protein localization protein 4, putative
36329.Q8I447	PF3D7_0505500	MSH6	kmeans	5	Blue	239	DNA mismatch repair protein; Component of the post-replicative DNA mismatch repair system (MMR).
36329.Q8I467	PF3D7_0503400	ADF1	kmeans	5	Blue	239	Cofilin/actin-depolymerizing factor homolog 1; Not involved in actin polymerisation, instead functions to stimulate nucleotide exchange on monomeric actin and influence turnover of the small amount of cytosolic actin microfilaments. Essential for erythrocytic schizogony (By similarity).
36329.Q8I477	PF3D7_0502300	N/A	kmeans	5	Blue	239	Uncharacterized protein
36329.Q8I482	PF3D7_0501800	CAF1A	kmeans	5	Blue	239	Protein HIRA; Required for replication-independent chromatin assembly and for the periodic repression of histone gene transcription during the cell cycle; Belongs to the WD repeat HIR1 family.
36329.Q8I488	PF3D7_0501200	PIESP2	kmeans	5	Blue	239	Parasite-infected erythrocyte surface protein
36329.Q8I4U7	PF3D7_1248700	N/A	kmeans	5	Blue	239	Uncharacterized protein
36329.Q8I4Y8	PF3D7_1244200	TFB2	kmeans	5	Blue	239	General transcription factor IIH subunit 4; Component of the general transcription and DNA repair factor IIH (TFIIH) core complex which is involved in general and transcription-coupled nucleotide excision repair (NER) of damaged DNA. ; Belongs to the TFB2 family.
36329.Q8I540	PF3D7_1238300	CWC22	kmeans	5	Blue	239	Pre-mRNA-splicing factor CWC22, putative
36329.Q8I553	PF3D7_1237000	UBA2	kmeans	5	Blue	239	SUMO-activating enzyme subunit; Belongs to the ubiquitin-activating E1 family.
36329.Q8I562	PF3D7_1236100	CARP	kmeans	5	Blue	239	Clustered-asparagine-rich protein
36329.Q8I574	PF3D7_1234800	SF3B3	kmeans	5	Blue	239	Splicing factor 3B subunit 3, putative
36329.Q8I577	PF3D7_1234500	N/A	kmeans	5	Blue	239	Uncharacterized protein
36329.Q8I581	PF3D7_1234100	BDP5	kmeans	5	Blue	239	Bromodomain protein, putative
36329.Q8I583	PF3D7_1233900	SENP1	kmeans	5	Blue	239	Sentrin-specific protease 1
36329.Q8I586	PF3D7_1233600	AARP1	kmeans	5	Blue	239	Asparagine and aspartate rich protein 1
36329.Q8I5F9	PF3D7_1225800	UBA1	kmeans	5	Blue	239	Ubiquitin-activating enzyme E1
36329.Q8I5I3	PF3D7_1223400	N/A	kmeans	5	Blue	239	Phospholipid-transporting ATPase, putative
36329.Q8I5I4	PF3D7_1223200	N/A	kmeans	5	Blue	239	Nucleus export protein BRR6, putative
36329.Q8I5K9	PF3D7_1220400	DRN1	kmeans	5	Blue	239	Debranching enzyme-associated ribonuclease, putative
36329.Q8I5T4	PF3D7_1211700	MCM5	kmeans	5	Blue	239	DNA replication licensing factor MCM5, putative; Belongs to the MCM family.
36329.Q8I5T7	PF3D7_1211300	MCM8	kmeans	5	Blue	239	DNA helicase MCM8, putative; Belongs to the MCM family.
36329.Q8I5V5	PF3D7_1209400	CIA1	kmeans	5	Blue	239	Probable cytosolic iron-sulfur protein assembly protein CIAO1 homolog; Essential component of the cytosolic iron-sulfur (Fe/S) protein assembly machinery. Required for the maturation of extramitochondrial Fe/S proteins.
36329.Q8I5W6	PF3D7_1208100	N/A	kmeans	5	Blue	239	Uncharacterized protein
36329.Q8I5X4	PF3D7_1207100	N/A	kmeans	5	Blue	239	Small subunit rRNA processing factor, putative
36329.Q8I5X7	PF3D7_1206800	N/A	kmeans	5	Blue	239	Uncharacterized protein
36329.Q8I5Z0	PF3D7_1205500	N/A	kmeans	5	Blue	239	Zinc finger protein, putative
36329.Q8I6Z1	PF3D7_0731600	ACS5	kmeans	5	Blue	239	Acyl-CoA synthetase
36329.Q8I6Z2	PF3D7_0729500	MT-A70	kmeans	5	Blue	239	mRNA (N6-adenosine)-methyltransferase, putative; Belongs to the MT-A70-like family.
36329.Q8I6Z8	PF3D7_1317000	USP39	kmeans	5	Blue	239	U4/U6.U5 tri-snRNP-associated protein 2, putative
36329.Q8IAM4	PF3D7_0802400	N/A	kmeans	5	Blue	239	Cyclin N-terminal domain-containing protein
36329.Q8IAN9	PF3D7_0804300	N/A	kmeans	5	Blue	239	Zinc finger protein, putative
36329.Q8IAS7	PF3D7_0809100	VAR	kmeans	5	Blue	239	Erythrocyte membrane protein 1, PfEMP1
36329.Q8IAS8	PF3D7_0809200	pfa55-14	kmeans	5	Blue	239	Asparagine-rich antigen Pfa55-14
36329.Q8IAW1	PF3D7_0812500	N/A	kmeans	5	Blue	239	RNA-binding protein, putative
36329.Q8IAW3	PF3D7_0812700	SNRPC	kmeans	5	Blue	239	U1 small nuclear ribonucleoprotein C; Component of the spliceosomal U1 snRNP, which is essential for recognition of the pre-mRNA 5' splice-site and the subsequent assembly of the spliceosome. U1-C is directly involved in initial 5' splice-site recognition for both constitutive and regulated alternative splicing. The interaction with the 5' splice-site seems to precede base-pairing between the pre…
36329.Q8IAX2	PF3D7_0813600	N/A	kmeans	5	Blue	239	Translation initiation factor SUI1, putative
36329.Q8IB25	PF3D7_0819000	N/A	kmeans	5	Blue	239	Cleavage and polyadenylation specificity factor subunit 2
36329.Q8IB67	PF3D7_0823300	GCN5	kmeans	5	Blue	239	Histone acetyltransferase GCN5
36329.Q8IB94	PF3D7_0826100	HEUL	kmeans	5	Blue	239	HECT-like E3 ubiquitin ligase, putative
36329.Q8IBB0	PF3D7_0827800	SET3	kmeans	5	Blue	239	SET domain protein, putative
36329.Q8IBC1	PF3D7_0829000	N/A	kmeans	5	Blue	239	Uncharacterized protein
36329.Q8IBD6	PF3D7_0831000	GEXP09	kmeans	5	Blue	239	PRESAN domain-containing protein
36329.Q8IBE9	PF3D7_0731300	PfG174	kmeans	5	Blue	239	PRESAN domain-containing protein
36329.Q8IBF5	PF3D7_0730400	IMP2	kmeans	5	Blue	239	IMP1-like protein, putative
36329.Q8IBH0	PF3D7_0728800	N/A	kmeans	5	Blue	239	Uncharacterized protein
36329.Q8IBH8	PF3D7_0727900	N/A	kmeans	5	Blue	239	Uncharacterized protein
36329.Q8IBH9	PF3D7_0727800	N/A	kmeans	5	Blue	239	Cation transporting ATPase, putative
36329.Q8IBU2	PF3D7_0715800	DMT1	kmeans	5	Blue	239	Drug/metabolite transporter DMT1, putative
36329.Q8IBV1	PF3D7_0714600	N/A	kmeans	5	Blue	239	Uncharacterized protein
36329.Q8IC20	PF3D7_0705000	N/A	kmeans	5	Blue	239	mRNA cap guanine-N7 methyltransferase, putative
36329.Q8ID59	PF3D7_1364800	RPB5	kmeans	5	Blue	239	DNA-directed RNA polymerases I, II, and III subunit RPABC1, putative
36329.Q8IDB8	PF3D7_1358700	YOP1L	kmeans	5	Blue	239	YOP1-like protein, putative
36329.Q8IDC0	PF3D7_1358500	N/A	kmeans	5	Blue	239	Zinc finger protein, putative
36329.Q8IDE5	PF3D7_1355700	NIF3	kmeans	5	Blue	239	NLI interacting factor-like phosphatase, putative
36329.Q8IDG6	PF3D7_1353400	N/A	kmeans	5	Blue	239	Ran-binding protein, putative
36329.Q8IDG7	PF3D7_1353300	N/A	kmeans	5	Blue	239	Uncharacterized protein PF13_0277
36329.Q8IDH3	PF3D7_1352700	AQR	kmeans	5	Blue	239	Intron-binding protein aquarius, putative
36329.Q8IDY8	PF3D7_1334000	N/A	kmeans	5	Blue	239	RING zinc finger protein, putative
36329.Q8IDZ2	PF3D7_1333600	UTP4	kmeans	5	Blue	239	U3 small nucleolar RNA-associated protein 4, putative
36329.Q8IDZ6	PF3D7_1333200	UBA1	kmeans	5	Blue	239	Ubiquitin-activating enzyme
36329.Q8IE14	PF3D7_1331300	SEC11	kmeans	5	Blue	239	Signal peptidase I
36329.Q8IEF9	PF3D7_1315500	N/A	kmeans	5	Blue	239	Uncharacterized protein
36329.Q8IEG2	PF3D7_1315300	N/A	kmeans	5	Blue	239	Uncharacterized protein
36329.Q8IEH3	PF3D7_1314100	N/A	kmeans	5	Blue	239	Uncharacterized protein
36329.Q8IEH6	PF3D7_1313700	N/A	kmeans	5	Blue	239	Maf-like protein, putative
36329.Q8IEN7	PF3D7_1307800	CEP170	kmeans	5	Blue	239	FHA domain-containing protein, putative
36329.Q8IES4	PF3D7_1304100	LigI	kmeans	5	Blue	239	DNA ligase
36329.Q8IFN9	PF3D7_0422700	EIF4A3	kmeans	5	Blue	239	Eukaryotic initiation factor 4A-III, putative; Belongs to the DEAD box helicase family.
36329.Q8IHU4	PF3D7_1142100	N/A	kmeans	5	Blue	239	J domain-containing protein
36329.Q8IHU7	PF3D7_1141800	N/A	kmeans	5	Blue	239	EELM2 domain-containing protein, putative
36329.Q8IHV8	PF3D7_1140700	N/A	kmeans	5	Blue	239	Chromo domain-containing protein
36329.Q8IID2	PF3D7_1123100	CDPK7	kmeans	5	Blue	239	Calcium-dependent protein kinase 7
36329.Q8IID3	PF3D7_1123000	N/A	kmeans	5	Blue	239	Uncharacterized protein
36329.Q8IID4	PF3D7_1122900	N/A	kmeans	5	Blue	239	Dynein heavy chain-like protein PF11_0240; Acts as a motor for the intracellular retrograde motility of vesicles and organelles along microtubules. Dynein has ATPase activity; the force-producing power stroke is thought to occur on release of ADP (By similarity).
36329.Q8IID5	PF3D7_1122800	CDPK6	kmeans	5	Blue	239	Calcium-dependent protein kinase 6
36329.Q8IIK1	PF3D7_1116500	FT2	kmeans	5	Blue	239	Folate transporter 2
36329.Q8IIL5	PF3D7_1114700	CLK3	kmeans	5	Blue	239	Serine/threonine protein kinase, putative
36329.Q8IIL7	PF3D7_1114500	N/A	kmeans	5	Blue	239	Uncharacterized protein
36329.Q8IIR0	PF3D7_1110200	PRPF6	kmeans	5	Blue	239	Pre-mRNA-processing factor 6, putative
36329.Q8IJ65	PF3D7_1034500	N/A	kmeans	5	Blue	239	Uncharacterized protein
36329.Q8IJ73	PF3D7_1033500	WDR70	kmeans	5	Blue	239	WD repeat-containing protein 70, putative
36329.Q8IJ75	PF3D7_1033300	N/A	kmeans	5	Blue	239	Uncharacterized protein
36329.Q8IJG6	PF3D7_1023900	CHD1	kmeans	5	Blue	239	Chromodomain-helicase-DNA-binding protein 1 homolog, putative
36329.Q8IJP2	PF3D7_1015300	METAP1b	kmeans	5	Blue	239	Methionine aminopeptidase; Cotranslationally removes the N-terminal methionine from nascent proteins. The N-terminal methionine is often cleaved when the second residue in the primary sequence is small and uncharged (Met- Ala-, Cys, Gly, Pro, Ser, Thr, or Val).
36329.Q8IJP4	PF3D7_1015100	N/A	kmeans	5	Blue	239	CWC16 domain-containing protein, putative
36329.Q8IJP9	PF3D7_1014600	ADA2	kmeans	5	Blue	239	Transcriptional coactivator ADA2
36329.Q8IJR3	PF3D7_1013200	N/A	kmeans	5	Blue	239	Uncharacterized protein
36329.Q8IJR6	PF3D7_1012900	ATG18	kmeans	5	Blue	239	Autophagy-related protein 18
36329.Q8IJR8	PF3D7_1012700	NIF4	kmeans	5	Blue	239	NLI interacting factor-like phosphatase, putative
36329.Q8IJU3	PF3D7_1010200	N/A	kmeans	5	Blue	239	DNA2/NAM7 helicase, putative
36329.Q8IJV1	PF3D7_1009400	ZNF2	kmeans	5	Blue	239	Zinc finger protein, putative
36329.Q8IJV6	PF3D7_1008900	AK1	kmeans	5	Blue	239	Adenylate kinase; Belongs to the adenylate kinase family.
36329.Q8IJZ9	PF3D7_1003800	EFTUD2	kmeans	5	Blue	239	U5 small nuclear ribonucleoprotein component, putative
36329.Q8IKD9	PF3D7_1469800	N/A	kmeans	5	Blue	239	Uncharacterized protein
36329.Q8IKE9	PF3D7_1468800	U2AF2	kmeans	5	Blue	239	Splicing factor U2AF large subunit, putative
36329.Q8IKG8	PF3D7_1466900	N/A	kmeans	5	Blue	239	Uncharacterized protein
36329.Q8IKH5	PF3D7_1466100	PPKL	kmeans	5	Blue	239	Serine/threonine-protein phosphatase
36329.Q8IKI5	PF3D7_1465300	N/A	kmeans	5	Blue	239	Ribonuclease Z, putative
36329.Q8IKI6	PF3D7_1465200	MED4	kmeans	5	Blue	239	Mediator of RNA polymerase II transcription subunit 4, putative
36329.Q8IKI7	PF3D7_1465100	COG6	kmeans	5	Blue	239	Conserved oligomeric Golgi complex subunit 6; Required for normal Golgi function.
36329.Q8IKM4	PF3D7_1460800	SNAPC3	kmeans	5	Blue	239	snRNA-activating protein complex subunit 3, putative
36329.Q8IKN9	PF3D7_1459200	N/A	kmeans	5	Blue	239	WD repeat-containing protein, putative
36329.Q8IKU5	PF3D7_1453200	N/A	kmeans	5	Blue	239	Uncharacterized protein
36329.Q8IKU7	PF3D7_1453000	N/A	kmeans	5	Blue	239	Uncharacterized protein
36329.Q8IKV0	PF3D7_1452600	N/A	kmeans	5	Blue	239	DCB domain-containing protein
36329.Q8IKV2	PF3D7_1452400	N/A	kmeans	5	Blue	239	Uncharacterized protein
36329.Q8IL33	PF3D7_1443800	CWC24	kmeans	5	Blue	239	Pre-mRNA-splicing factor CWC24, putative
36329.Q8IL56	PF3D7_1441400	FACT-S	kmeans	5	Blue	239	FACT complex subunit SSRP1; Component of the FACT complex, a general chromatin factor that acts to reorganize nucleosomes. The FACT complex is involved in multiple processes that require DNA as a template such as mRNA elongation, DNA replication and DNA repair. During transcription elongation the FACT complex acts as a histone chaperone that both destabilizes and restores nucleosomal structure. I…
36329.Q8IL83	PF3D7_1438500	CPSF3	kmeans	5	Blue	239	Cleavage and polyadenylation specificity factor subunit 3, putative
36329.Q8IL96	PF3D7_1437000	N/A	kmeans	5	Blue	239	N-acetyltransferase, GNAT family, putative
36329.Q8ILA3	PF3D7_1436100	N/A	kmeans	5	Blue	239	Uncharacterized protein
36329.Q8ILB9	PF3D7_1434500	N/A	kmeans	5	Blue	239	Dynein-related AAA-type ATPase, putative
36329.Q8ILS0	PF3D7_1417500	CBF5	kmeans	5	Blue	239	H/ACA ribonucleoprotein complex subunit 4, putative
36329.Q8ILT4	PF3D7_1416200	MCA3	kmeans	5	Blue	239	Metacaspase-3, putative
36329.Q8IM12	PF3D7_1408400	FANCJ	kmeans	5	Blue	239	FANCJ-like helicase, putative
36329.Q8IM61	PF3D7_1403000	N/A	kmeans	5	Blue	239	Uncharacterized protein
36329.Q8IM62	PF3D7_1402800	N/A	kmeans	5	Blue	239	Uncharacterized protein
36329.Q8IM66	PF3D7_1402300	RPN6	kmeans	5	Blue	239	26S proteasome regulatory subunit RPN6
36329.Q8IM73	PF3D7_1401600	N/A	kmeans	5	Blue	239	PRESAN domain-containing protein
36329.Q9U0J0	PF3D7_0409600	RPA1	kmeans	5	Blue	239	Replication protein A1, large subunit
36329.Q8IKW2	PF3D7_1451400	Sir2B	kmeans	5	Blue	239	NAD-dependent protein deacetylase Sir2B; Regulates the expression of the surface antigen-coding var genes central to the malaria pathogenesis. Cooperates with Sir2A to mediate silencing and mutual exclusive expression of only 1 of the 60 subtelomeric var genes at a time, coding for functionally different but epitopically variant versions of the erythrocyte membrane protein 1 (PfEMP1) molecule, to…

## Sheet: ClusterwisEnrichment_Glideosome
Database:	PlasmoDB
Search Term:	"Glideosome"
Organism:	Plasmodium falciparum 3D7
Gene Filters:	Pubmed, Rodent malaria Phenotype						Enrichment of Glideosome Associated Proteins
Date:	2022-07-30						Cluster#	Glideosome Motor Complex-associated Proteins	Other Proteins	pVal
Proteins:	19						1	0	363	1
							2	1	262	0.391002
							3	0	189	1
Protein	Name	Description					4	7	266	0.00598626
PF3D7_0310100	CDPK3	calcium-dependent protein kinase 3					5	0	239	1
PF3D7_0423500	GAPM2	glideosome associated protein with multiple membrane spans 2
PF3D7_0515700	GAP40	glideosome-associated protein 40, putative
PF3D7_0708600	IMC1d	inner membrane complex protein 1d, putative
PF3D7_0717500	CDPK4	calcium-dependent protein kinase 4
PF3D7_0719500	CDC50A	LEM3/CDC50 family protein, putative
PF3D7_0823500	IMC1i	inner membrane complex protein 1i, putative
PF3D7_0918000	GAP50	glideosome-associated protein 50
PF3D7_1003600	IMC1c	inner membrane complex protein 1c, putative
PF3D7_1011000	ISP1	inner membrane complex sub-compartment protein 1
PF3D7_1017500	ELC	myosin essential light chain ELC
PF3D7_1222700	GAP45	glideosome-associated protein 45
PF3D7_1246400	MTIP	myosin A-tail interacting protein
PF3D7_1323700	GAPM1	glideosome associated protein with multiple membrane spans 1
PF3D7_1342600	MyoA	myosin A
PF3D7_1360500	GCbeta	guanylyl cyclase beta
PF3D7_1406800	GAPM3	glideosome associated protein with multiple membrane spans 3
PF3D7_1436600	PKG	cGMP-dependent protein kinase
PF3D7_1470500	PDEdelta	cGMP-specific 3',5'-cyclic phosphodiesterase delta

## Sheet: ClusterwisEnrichment_Invasion
Database:	PlasmoDB
Search Term:	"Invasion Motor"
Organism:	Plasmodium falciparum 3D7				Enrichment of Glideosome Associated Proteins
Gene Filters:	Pubmed, Rodent malaria Phenotype				Cluster#	Other Proteins	Invasion-associated Proteins	Expected	pVal
Date:	2022-07-30				1	348	15	54.8	6.63619e-21
Proteins:	274				2	245	18	54.8	1.77123e-24
					3	182	7	54.8	4.12006e-09
					4	241	32	54.8	8.67779e-37
Protein	Name	Description			5	232	7	54.8	4.12006e-09
PF3D7_0101800	N/A	stevor
PF3D7_0102200	RESA	ring-infected erythrocyte surface antigen
PF3D7_0102500	EBA181	erythrocyte binding antigen-181
PF3D7_0102700	MaTrA	merozoite-associated tryptophan-rich antigen
PF3D7_0104000	TRSP	thrombospondin-related sporozoite protein
PF3D7_0107600	eIK2	eukaryotic translation initiation factor 2-alpha kinase 2, putative
PF3D7_0108600	N/A	DnaJ domain-containing protein, putative
PF3D7_0111000	N/A	kinesin-8B, putative
PF3D7_0112100	PIMMS1	PIMMS1 protein
PF3D7_0115400	N/A	stevor
PF3D7_0200400	N/A	stevor
PF3D7_0201300	N/A	stevor
PF3D7_0201900	EMP3	erythrocyte membrane protein 3
PF3D7_0202000	KAHRP	knob-associated histidine-rich protein
PF3D7_0202900	DHHC12	palmitoyltransferase DHHC12, putative
PF3D7_0206200	PAT	pantothenate transporter
PF3D7_0210600	CERLI1	protein CERLI1
PF3D7_0212600	SPATR	secreted protein with altered thrombospondin repeat domain
PF3D7_0215900	DHHC11	palmitoyltransferase DHHC11, putative
PF3D7_0217300	AP2S	AP-2 complex subunit sigma, putative
PF3D7_0217500	CDPK1	calcium-dependent protein kinase 1
PF3D7_0221400	N/A	stevor
PF3D7_0222800	N/A	stevor
PF3D7_0300400	N/A	stevor
PF3D7_0303400	DHHC1	palmitoyltransferase DHHC1
PF3D7_0304000	IMC1a	inner membrane complex protein 1a, putative
PF3D7_0304600	CSP	circumsporozoite (CS) protein
PF3D7_0309100	OMD	OMD protein, putative
PF3D7_0309600	PfP2	60S acidic ribosomal protein P2
PF3D7_0310100	CDPK3	calcium-dependent protein kinase 3
PF3D7_0311400	PKRP	kinase-related protein PKRP, putative
PF3D7_0311700	PM6	plasmepsin VI
PF3D7_0315200	CTRP	circumsporozoite- and TRAP-related protein
PF3D7_0316000	MA	microneme associated antigen
PF3D7_0317100	B9	6-cysteine protein
PF3D7_0317500	EG5	kinesin-5
PF3D7_0319400	N/A	kinesin-8X
PF3D7_0321400	pPK1	pseudo protein kinase 1, putative
PF3D7_0323400	RIPR	Rh5 interacting protein
PF3D7_0324600	N/A	stevor
PF3D7_0400800	N/A	stevor
PF3D7_0402300	RH1	reticulocyte binding protein homologue 1
PF3D7_0402600	N/A	stevor
PF3D7_0404400	P36	6-cysteine protein P36
PF3D7_0404500	P52	6-cysteine protein P52
PF3D7_0404700	DPAP3	dipeptidyl aminopeptidase 3
PF3D7_0405200	CERLI2	protein CERLI2
PF3D7_0405300	LISP2	liver specific protein 2, putative
PF3D7_0408600	SIAP1	sporozoite invasion-associated protein 1
PF3D7_0408700	PLP1	perforin-like protein 1
PF3D7_0415400	N/A	coatomer subunit zeta, putative
PF3D7_0417100	PUF2	mRNA-binding protein PUF2
PF3D7_0423100	N/A	AP-4 complex subunit sigma, putative
PF3D7_0423400	AARP	apical asparagine-rich protein AARP
PF3D7_0423800	CyRPA	cysteine-rich protective antigen
PF3D7_0424100	RH5	reticulocyte binding protein homologue 5
PF3D7_0424200	RH4	reticulocyte binding protein homologue 4
PF3D7_0424300	EBA165	erythrocyte binding antigen-165, pseudogene
PF3D7_0424400	SURF4.2	surface-associated interspersed protein 4.2 (SURFIN 4.2)
PF3D7_0425500	N/A	stevor
PF3D7_0501600	RAP2	rhoptry-associated protein 2
PF3D7_0503600	MyoB	myosin B
PF3D7_0506900	ROM4	rhomboid protease ROM4
PF3D7_0507200	SUB3	subtilisin-like protease 3
PF3D7_0507300	SOPT	subtilisin-like ookinete protein SOPT
PF3D7_0507500	SUB1	subtilisin-like protease 1
PF3D7_0508500	ND6	ND6 protein, putative
PF3D7_0511000	TCTP	translationally-controlled tumor protein homolog
PF3D7_0515100	ROM9	rhomboid protease ROM9
PF3D7_0517600	CPbeta	F-actin-capping protein subunit beta, putative
PF3D7_0517800	DCX	apicortin
PF3D7_0518700	PUF1	mRNA-binding protein PUF1
PF3D7_0518800	PSOP13	secreted ookinete protein, putative
PF3D7_0528400	DHHC7	palmitoyltransferase DHHC7
PF3D7_0530900	FRM1	formin 1
PF3D7_0602300	PALM	liver merozoite formation protein, putative
PF3D7_0603800	CEP76	NdP2 protein, putative
PF3D7_0606700	N/A	coatomer alpha subunit, putative
PF3D7_0609800	DHHC2	palmitoyltransferase DHHC2, putative
PF3D7_0613300	ROP14	rhoptry protein ROP14
PF3D7_0613500	N/A	AP-3 complex subunit beta, putative
PF3D7_0613900	MyoE	myosin E, putative
PF3D7_0615100	ENR	enoyl-acyl carrier reductase
PF3D7_0616500	TLP	TRAP-like protein
PF3D7_0617100	N/A	AP-2 complex subunit alpha, putative
PF3D7_0617600	N/A	stevor
PF3D7_0620000	PIMMS43	PIMMS43 protein
PF3D7_0623400	Mei2	MEI2-like RNA-binding protein
PF3D7_0626300	FabB/FabF	3-oxoacyl-acyl-carrier protein synthase I/II
PF3D7_0628100	HECT1	HECT domain-containing protein 1, putative
PF3D7_0629300	PL	phospholipase, putative
PF3D7_0631900	N/A	stevor
PF3D7_0700400	N/A	stevor
PF3D7_0704600	UT	HECT-type E3 ubiquitin ligase UT
PF3D7_0707300	RAMA	rhoptry-associated membrane antigen
PF3D7_0714300	DHHC4	palmitoyltransferase DHHC4, putative
PF3D7_0717500	CDPK4	calcium-dependent protein kinase 4
PF3D7_0723100	CPH1	protein CPH1, putative
PF3D7_0724900	N/A	kinesin-20, putative
PF3D7_0730200	N/A	AP-4 complex subunit beta, putative
PF3D7_0730300	ApiAP2	AP2 domain transcription factor AP2-L, putative
PF3D7_0731500	EBA175	erythrocyte binding antigen-175
PF3D7_0732000	N/A	stevor
PF3D7_0801000	N/A	Plasmodium exported protein (PHISTc)
PF3D7_0802100	AP2-LT	AP2 domain transcription factor AP2-LT
PF3D7_0802600	ACbeta	adenylyl cyclase beta
PF3D7_0802800	CNA	serine/threonine protein phosphatase 2B catalytic subunit A
PF3D7_0808100	N/A	AP-3 complex subunit delta, putative
PF3D7_0808200	PMX	plasmepsin X
PF3D7_0808400	SEC28	coatomer subunit epsilon, putative
PF3D7_0811300	CAF1	CCR4-associated factor 1
PF3D7_0812300	SSP3	sporozoite surface protein 3, putative
PF3D7_0814600	PIMMS22	PIMMS22 protein, putative
PF3D7_0816200	VPS2	vacuolar protein sorting-associated protein 2, putative
PF3D7_0816500	HSP20	small heat shock protein HSP20, putative
PF3D7_0816600	ClpB1	chaperone protein ClpB1
PF3D7_0817700	RON5	rhoptry neck protein 5
PF3D7_0818600	PBLP	BEM46-like protein, putative
PF3D7_0819200	PLP5	perforin-like protein 5
PF3D7_0819400	PLP4	perforin-like protein 4
PF3D7_0822700	TRP1	thrombospondin-related protein 1, putative
PF3D7_0822900	PIC2	PhIL1-interacting candidate PIC2
PF3D7_0823300	GCN5	histone acetyltransferase GCN5
PF3D7_0828800	GAMA	GPI-anchored micronemal antigen
PF3D7_0830300	SIAP2	sporozoite invasion-associated protein 2
PF3D7_0830500	TryThrA	sporozoite and liver stage tryptophan-rich protein, putative
PF3D7_0832000	N/A	stevor
PF3D7_0832400	N/A	stevor
PF3D7_0832600	N/A	stevor
PF3D7_0832900	N/A	stevor
PF3D7_0900900	N/A	stevor
PF3D7_0901600	N/A	stevor
PF3D7_0904100	N/A	AP-4 complex subunit epsilon, putative
PF3D7_0904400	SPC3	signal peptidase complex subunit 3, putative
PF3D7_0905400	RhopH3	high molecular weight rhoptry protein 3
PF3D7_0905900	SEC27	coatomer subunit beta, putative
PF3D7_0906100	VPS46	vacuolar protein sorting-associated protein 46, putative
PF3D7_0909200	POFUT2	GDP-fucose protein O-fucosyltransferase 2
PF3D7_0911900	ICP	falstatin
PF3D7_0918000	GAP50	glideosome-associated protein 50
PF3D7_0923300	PLP3	perforin-like protein 3
PF3D7_0929600	N/A	G2 protein, putative
PF3D7_0930300	MSP1	merozoite surface protein 1
PF3D7_0932200	PFN	profilin
PF3D7_0932500	DHHC6	palmitoyltransferase DHHC6, putative
PF3D7_0934800	PKAc	cAMP-dependent protein kinase catalytic subunit
PF3D7_0935800	CLAG9	cytoadherence linked asexual protein 9
PF3D7_1002200	PArt	tryptophan-rich antigen 3
PF3D7_1007700	AP2-I	AP2 domain transcription factor AP2-I
PF3D7_1012200	RA	rhoptry associated adhesin
PF3D7_1015900	ENO	enolase
PF3D7_1016300	GBP130	GBP130 protein
PF3D7_1016900	ETRAMP10.3	early transcribed membrane protein 10.3
PF3D7_1017100	RON12	rhoptry neck protein 12
PF3D7_1027300	nPrx	peroxiredoxin
PF3D7_1027900	DHHC10	palmitoyltransferase DHHC10, putative
PF3D7_1028700	MTRAP	merozoite TRAP-like protein
PF3D7_1033700	BDP1	bromodomain protein 1
PF3D7_1035400	MSP3	merozoite surface protein 3
PF3D7_1035500	MSP6	merozoite surface protein 6
PF3D7_1035700	DBLMSP	duffy binding-like merozoite surface protein
PF3D7_1036000	MSP11	merozoite surface protein 11
PF3D7_1040200	N/A	stevor
PF3D7_1104400	Trx-mero	thioredoxin-like mero protein
PF3D7_1113900	MAPK2	mitogen-activated protein kinase 2
PF3D7_1114100	ROM1	rhomboid protease ROM1
PF3D7_1115900	DHHC9	palmitoyltransferase DHHC9
PF3D7_1116000	RON4	rhoptry neck protein 4
PF3D7_1116800	HSP101	heat shock protein 101
PF3D7_1118100	AP1S	AP-1 complex subunit sigma, putative
PF3D7_1119500	N/A	AP-4 complex subunit mu, putative
PF3D7_1121000	DHHC3	palmitoyltransferase DHHC3
PF3D7_1121600	EXP1	exported protein 1
PF3D7_1122800	CDPK6	calcium-dependent protein kinase 6
PF3D7_1132800	AQP	aquaglyceroporin
PF3D7_1133400	AMA1	apical membrane antigen 1
PF3D7_1136900	SUB2	subtilisin-like protease 2
PF3D7_1137800	SPELD	sporozoite surface protein essential for liver stage development, putative
PF3D7_1140900	N/A	NdP1 protein, putative
PF3D7_1141900	IMC1b	inner membrane complex protein 1b, putative
PF3D7_1143100	AP2-O	AP2 domain transcription factor AP2-O
PF3D7_1145100	SEC21	coatomer subunit gamma, putative
PF3D7_1146700	N/A	kinesin-X4, putative
PF3D7_1147000	SLARP	sporozoite and liver stage asparagine-rich protein
PF3D7_1147800	MAEBL	membrane associated erythrocyte binding-like protein
PF3D7_1149900	N/A	stevor
PF3D7_1206000	SHLP2	shewanella-like protein phosphatase 2
PF3D7_1207300	LIMP	LIMP protein, putative
PF3D7_1211000	N/A	kinesin-X3, putative
PF3D7_1212900	BDP2	bromodomain protein 2, putative
PF3D7_1216600	CelTOS	cell traversal protein for ookinetes and sporozoites
PF3D7_1218000	TRAMP	thrombospondin-related apical membrane protein
PF3D7_1218300	AP2-MU	AP-2 complex subunit mu
PF3D7_1219000	FRM2	formin 2
PF3D7_1222700	GAP45	glideosome-associated protein 45
PF3D7_1223100	PKAr	cAMP-dependent protein kinase regulatory subunit
PF3D7_1228600	MSP9	merozoite surface protein 9
PF3D7_1229100	MRP2	multidrug resistance-associated protein 2
PF3D7_1229400	MIF	macrophage migration inhibitory factor
PF3D7_1229800	MyoJ	myosin J, putative
PF3D7_1232700	ND9	Nd9 protein
PF3D7_1244500	PIMMS57	PIMMS57 protein
PF3D7_1245100	KLP8	kinesin-13, putative
PF3D7_1245600	N/A	kinesin-15, putative
PF3D7_1246400	MTIP	myosin A-tail interacting protein
PF3D7_1250500	N/A	AP-3 complex subunit sigma, putative
PF3D7_1251200	N/A	coronin
PF3D7_1252200	CHT1	chitinase
PF3D7_1252400	RH3	reticulocyte binding protein homologue 3, pseudogene
PF3D7_1254100	N/A	stevor
PF3D7_1254300	N/A	stevor
PF3D7_1254600	N/A	stevor
PF3D7_1300900	N/A	stevor
PF3D7_1301600	EBA140	erythrocyte binding antigen-140
PF3D7_1302200	UIS3	protein UIS3
PF3D7_1302500	N/A	AAA domain-containing protein, putative
PF3D7_1303800	N/A	conserved Plasmodium protein, unknown function
PF3D7_1310700	PIC5	PhIL1-interacting candidate PIC5
PF3D7_1311400	AP1M1	AP-1 complex subunit mu-1
PF3D7_1316400	SAS6L	SAS6-like protein, putative
PF3D7_1321400	DHHC8	palmitoyltransferase DHHC8, putative
PF3D7_1321500	PDEbeta	3',5'-cyclic nucleotide phosphodiesterase beta
PF3D7_1321600	PDEgamma	cGMP-specific 3',5'-cyclic phosphodiesterase gamma, putative
PF3D7_1322500	DHHC5	palmitoyltransferase DHHC5
PF3D7_1323500	PMV	plasmepsin V
PF3D7_1329100	MyoF	myosin F, putative
PF3D7_1335100	MSP7	merozoite surface protein 7
PF3D7_1335200	RH6	reticulocyte binding protein homologue 6, pseudogene
PF3D7_1335300	RH2b	reticulocyte binding protein 2 homologue b
PF3D7_1335400	RH2a	reticulocyte binding protein 2 homologue a
PF3D7_1335900	TRAP	thrombospondin-related anonymous protein
PF3D7_1337800	CDPK5	calcium-dependent protein kinase 5
PF3D7_1340000	PSOP7	secreted ookinete protein, putative
PF3D7_1342500	SPECT1	sporozoite protein essential for cell traversal
PF3D7_1342600	MyoA	myosin A
PF3D7_1353000	LysTrpA	tryptophan-rich protein, pseudogene
PF3D7_1360500	GCbeta	guanylyl cyclase beta
PF3D7_1361400	ADF2	actin-depolymerizing factor 2
PF3D7_1361800	GAC	glideosome-associated connector
PF3D7_1367800	PSOP2	secreted ookinete protein, putative
PF3D7_1372800	N/A	stevor
PF3D7_1400700	N/A	stevor
PF3D7_1404300	SOAP	secreted ookinete adhesive protein, putative
PF3D7_1406700	VPS29	vacuolar protein sorting-associated protein 29
PF3D7_1407800	PM4	plasmepsin IV
PF3D7_1408200	AP2-G2	AP2 domain transcription factor AP2-G2
PF3D7_1410400	RAP1	rhoptry-associated protein 1
PF3D7_1411100	N/A	conserved Plasmodium membrane protein, unknown function
PF3D7_1417000	IMC1l	inner membrane complex protein 1l
PF3D7_1417400	EPAC	rap guanine nucleotide exchange factor, putative, pseudogene
PF3D7_1420700	P113	surface protein P113
PF3D7_1430200	PMIX	plasmepsin IX
PF3D7_1431500	MAPK1	mitogen-activated protein kinase 1
PF3D7_1436600	PKG	cGMP-dependent protein kinase
PF3D7_1439600	NDUFA4	cytochrome c oxidase subunit NDUFA4, putative
PF3D7_1442600	TREP	TRAP-like protein
PF3D7_1444800	FBPA	fructose-bisphosphate aldolase
PF3D7_1449000	GEST	gamete egress and sporozoite traversal protein, putative
PF3D7_1451600	LAP5	LCCL domain-containing protein
PF3D7_1451700	CNB	calcineurin subunit B
PF3D7_1452000	RON2	rhoptry neck protein 2
PF3D7_1455500	N/A	AP-1 complex subunit gamma, putative
PF3D7_1457000	SPP	signal peptide peptidase
PF3D7_1458000	FP1	cysteine proteinase falcipain 1
PF3D7_1459400	N/A	conserved protein, unknown function
PF3D7_1462800	GAPDH	glyceraldehyde-3-phosphate dehydrogenase
PF3D7_1463900	RON11	rhoptry neck protein 11, putative
PF3D7_1464600	UIS2	serine/threonine protein phosphatase UIS2, putative
PF3D7_1466100	PPKL	protein phosphatase containing kelch-like domains
PF3D7_1470500	PDEdelta	cGMP-specific 3',5'-cyclic phosphodiesterase delta
PF3D7_1470800	N/A	conserved Plasmodium protein, unknown function
PF3D7_1471100	EXP2	exported protein 2
PF3D7_1479500	N/A	stevor
PF3D7_1479900	N/A	stevor

## Sheet: KmeanClusters_KEGGenrichment
Cluster	ID	Description	GeneRatio	BgRatio	pvalue	p.adjust	qvalue	geneIDs	Count
Cluster3	pfa03010	Ribosome	26/85	94/1060	1.26239e-09	4.29211e-08	3.18919e-08	PF3D7_0706400/PF3D7_1317800/PF3D7_0309600/PF3D7_0317600/PF3D7_0316800/PF3D7_0306900/PF3D7_0517000/PF3D7_0506100/PF3D7_0721600/PF3D7_1351400/PF3D7_1341200/PF3D7_1308300/PF3D7_1302800/PF3D7_1144000/PF3D7_1142500/PF3D7_1130200/PF3D7_1103100/PF3D7_1027800/PF3D7_1026800/PF3D7_1019400/PF3D7_1004000/PF3D7_1460700/PF3D7_1441200/PF3D7_1424100/PF3D7_1414300/PF3D7_1408600	26
Cluster5	pfa03040	Spliceosome	19/54	87/1060	6.25893e-09	1.62732e-07	1.1859e-07	PF3D7_1402700/PF3D7_1235900/PF3D7_0308900/PF3D7_0218500/PF3D7_0302000/PF3D7_1033600/PF3D7_0405400/PF3D7_0922700/PF3D7_0917600/PF3D7_0528700/PF3D7_0508700/PF3D7_1234800/PF3D7_1317000/PF3D7_0812700/PF3D7_1352700/PF3D7_0422700/PF3D7_1110200/PF3D7_1003800/PF3D7_1468800	19
Cluster3	pfa04141	Protein processing in endoplasmic reticulum	15/85	46/1060	7.28694e-07	1.23878e-05	9.20456e-06	PF3D7_1344200/PF3D7_0619400/PF3D7_1437900/PF3D7_1222300/PF3D7_0917900/PF3D7_1230700/PF3D7_0818900/PF3D7_0728000/PF3D7_0708400/PF3D7_0707700/PF3D7_1346100/PF3D7_1318800/PF3D7_1136800/PF3D7_1438100/PF3D7_1422500	15
Cluster3	pfa00010	Glycolysis / Gluconeogenesis	31291	20/1060	7.32694e-06	8.30386e-05	6.17005e-05	PF3D7_0626800/PF3D7_0627800/PF3D7_1015900/PF3D7_0922500/PF3D7_1444800/PF3D7_1462800/PF3D7_1446400/PF3D7_1436000/PF3D7_1439900	9
Cluster4	pfa04145	Phagosome	16650	25/1060	3.5225e-06	8.10174e-05	6.30342e-05	PF3D7_0903200/PF3D7_0320100/PF3D7_0406100/PF3D7_0106100/PF3D7_0515300/PF3D7_0806800/PF3D7_1464700/PF3D7_1311900	8
Cluster4	pfa04070	Phosphatidylinositol signaling system	16558	10/1060	2.3738e-05	0.000272987	0.000212392	PF3D7_0110600/PF3D7_0930500/PF3D7_0515300/PF3D7_0509800/PF3D7_1471400	5
Cluster3	pfa01200	Carbon metabolism	31382	43/1060	6.42761e-05	0.000546346	0.000405954	PF3D7_0626800/PF3D7_0627800/PF3D7_1015900/PF3D7_0204500/PF3D7_0922500/PF3D7_1444800/PF3D7_1462800/PF3D7_1453800/PF3D7_1446400/PF3D7_1436000/PF3D7_1426700/PF3D7_1439900	12
Cluster3	pfa03008	Ribosome biogenesis in eukaryotes	31352	40/1060	0.00015573	0.00105897	0.000786847	PF3D7_0302900/PF3D7_1117700/PF3D7_0418700/PF3D7_0802300/PF3D7_0729300/PF3D7_1118500/PF3D7_1020700/PF3D7_1448000/PF3D7_1431300/PF3D7_1410900/PF3D7_1407100	11
Cluster5	pfa03420	Nucleotide excision repair	19906	31/1060	0.00061103	0.00757774	0.00552224	PF3D7_1361900/PF3D7_1226600/PF3D7_0934100/PF3D7_0512300/PF3D7_1244200/PF3D7_1304100/PF3D7_0409600	7
Cluster5	pfa03020	RNA polymerase	19876	24/1060	0.000874355	0.00757774	0.00552224	PF3D7_0318200/PF3D7_0215700/PF3D7_0110400/PF3D7_0923000/PF3D7_0509400/PF3D7_1364800	6
Cluster5	pfa03430	Mismatch repair	19845	20/1060	0.00245935	0.0131554	0.00958696	PF3D7_1361900/PF3D7_1226600/PF3D7_0505500/PF3D7_1304100/PF3D7_0409600	5
Cluster5	pfa03030	DNA replication	19876	29/1060	0.00252989	0.0131554	0.00958696	PF3D7_0705400/PF3D7_1361900/PF3D7_1226600/PF3D7_1211700/PF3D7_1304100/PF3D7_0409600	6
Cluster3	pfa01230	Biosynthesis of amino acids	31229	26/1060	0.00312105	0.0176859	0.0131412	PF3D7_0626800/PF3D7_1015900/PF3D7_0204500/PF3D7_0922500/PF3D7_1444800/PF3D7_1462800/PF3D7_1439900	7
Cluster4	pfa03050	Proteasome	16589	35/1060	0.00266983	0.0204687	0.0159253	PF3D7_1328100/PF3D7_1353800/PF3D7_1311500/PF3D7_1129200/PF3D7_1017900/PF3D7_1011400	6
Cluster2	pfa00071	Fatty acid degradation	45352	12/1060	0.00196553	0.0316557	0.0210454	PF3D7_1372400/PF3D7_0525100/PF3D7_1238800	3
Cluster2	pfa04146	Peroxisome	45352	15/1060	0.00388656	0.0316557	0.0210454	PF3D7_1372400/PF3D7_0525100/PF3D7_1238800	3
Cluster2	pfa03018	RNA degradation	45383	35/1060	0.00662105	0.0316557	0.0210454	PF3D7_1332400/PF3D7_0519500/PF3D7_0821300/PF3D7_1308900	4
Cluster2	pfa00061	Fatty acid biosynthesis	45352	18/1060	0.00666437	0.0316557	0.0210454	PF3D7_1372400/PF3D7_0525100/PF3D7_1238800	3
Cluster2	pfa01212	Fatty acid metabolism	45352	24/1060	0.0151137	0.057432	0.038182	PF3D7_1372400/PF3D7_0525100/PF3D7_1238800	3
Cluster3	pfa03013	Nucleocytoplasmic transport	31199	25/1060	0.0113921	0.0553329	0.0411142	PF3D7_0627700/PF3D7_0302900/PF3D7_1117700/PF3D7_1357000/PF3D7_1230700/PF3D7_0729300	6
Cluster1	pfa03013	Nucleocytoplasmic transport	16923	25/1060	0.0034172	0.0495495	0.0413662	PF3D7_0910100/PF3D7_1315900/PF3D7_0706000/PF3D7_0932800/PF3D7_0524000	5
Cluster1	pfa04144	Endocytosis	16923	25/1060	0.0034172	0.0495495	0.0413662	PF3D7_1020900/PF3D7_0216400/PF3D7_1320600/PF3D7_1457500/PF3D7_1441600	5
Cluster4	pfa00564	Glycerophospholipid metabolism	16528	21/1060	0.00999775	0.0574871	0.0447268	PF3D7_0930500/PF3D7_1212500/PF3D7_1124600/PF3D7_1471400	4
Cluster5	pfa03022	Basal transcription factors	19784	11/1060	0.0154255	0.0668437	0.048712	PF3D7_0934100/PF3D7_0512300/PF3D7_1244200	3
Cluster3	pfa01110	Biosynthesis of secondary metabolites	15/85	108/1060	0.0194607	0.0827079	0.0614548	PF3D7_0626800/PF3D7_0627800/PF3D7_1015900/PF3D7_0204500/PF3D7_0608800/PF3D7_0922500/PF3D7_1444800/PF3D7_0920800/PF3D7_1349200/PF3D7_1012400/PF3D7_1462800/PF3D7_1453800/PF3D7_1446400/PF3D7_1436000/PF3D7_1439900	15
Cluster1	pfa01250	Biosynthesis of nucleotide sugars	16862	11/1060	0.0098877	0.0926981	0.0773886	PF3D7_0624000/PF3D7_1130000/PF3D7_1012500	3
Cluster1	pfa00030	Pentose phosphate pathway	16862	12/1060	0.0127859	0.0926981	0.0773886	PF3D7_1325100/PF3D7_1012500/PF3D7_1454700	3
Cluster1	pfa00520	Amino sugar and nucleotide sugar metabolism	16862	13/1060	0.0161211	0.0935025	0.0780602	PF3D7_0624000/PF3D7_1130000/PF3D7_1012500	3

## Sheet: Kmean_Cluster4
STRING.Identifiers	Protein	Name	Clustering Method Applied	Cluster.Number	Cluster.Color	Proteins.In.Cluster	Description
36329.A0A143ZVJ7	PF3D7_0717600	IMC32	kmeans	4	Cyan	273	Uncharacterized protein
36329.A0A143ZVJ8	PF3D7_0719500	CDC50A	kmeans	4	Cyan	273	LEM3/CDC50 family protein, putative
36329.A0A143ZVL6	PF3D7_0806700	N/A	kmeans	4	Cyan	273	Uncharacterized protein
36329.A0A143ZVW7	PF3D7_0704300	N/A	kmeans	4	Cyan	273	Uncharacterized protein
36329.A0A143ZWQ6	PF3D7_0721000	N/A	kmeans	4	Cyan	273	Uncharacterized protein
36329.A0A143ZXM1	PF3D7_0806100	N/A	kmeans	4	Cyan	273	Uncharacterized protein
36329.A0A143ZYA5	PF3D7_1025900	N/A	kmeans	4	Cyan	273	Uncharacterized protein
36329.A0A143ZZM5	PF3D7_1206300	N/A	kmeans	4	Cyan	273	Uncharacterized protein
36329.A0A143ZZV5	PF3D7_0804500	N/A	kmeans	4	Cyan	273	Uncharacterized protein
36329.A0A144A1B9	PF3D7_1232500	N/A	kmeans	4	Cyan	273	CG2-related protein, putative
36329.A0A144A2Q6	PF3D7_1467600	N/A	kmeans	4	Cyan	273	Uncharacterized protein
36329.A0A5K1K895	PF3D7_0615900	N/A	kmeans	4	Cyan	273	Protein phosphatase, putative
36329.A0A5K1K8F4	PF3D7_1319600	N/A	kmeans	4	Cyan	273	ACDC domain-containing protein, putative
36329.A0A5K1K8J3	PF3D7_1361800	GAC	kmeans	4	Cyan	273	Glideosome-associated connector
36329.A0A5K1K8M3	PF3D7_1369200	N/A	kmeans	4	Cyan	273	Uncharacterized protein
36329.A0A5K1K8N5	PF3D7_0701600	MC-2TM	kmeans	4	Cyan	273	Pfmc-2TM Maurer's cleft two transmembrane protein
36329.A0A5K1K8R0	PF3D7_1348400	N/A	kmeans	4	Cyan	273	Uncharacterized protein
36329.A0A5K1K8R5	PF3D7_1325900	N/A	kmeans	4	Cyan	273	Uncharacterized protein
36329.A0A5K1K8U0	PF3D7_1359600	N/A	kmeans	4	Cyan	273	Uncharacterized protein
36329.A0A5K1K8V1	PF3D7_1334100	N/A	kmeans	4	Cyan	273	Uncharacterized protein
36329.A0A5K1K8Y0	PF3D7_1337500	N/A	kmeans	4	Cyan	273	Uncharacterized protein
36329.A0A5K1K8Y1	PF3D7_1345600	N/A	kmeans	4	Cyan	273	Inner membrane complex protein
36329.A0A5K1K982	PF3D7_1328200	N/A	kmeans	4	Cyan	273	Uncharacterized protein
36329.A0A5K1K988	PF3D7_1351700	IMC1f	kmeans	4	Cyan	273	Inner membrane complex protein 1f, putative
36329.A0A5K1K993	PF3D7_1339900	ABCB5	kmeans	4	Cyan	273	ABC transporter B family member 5, putative
36329.A0A5K1K9A0	PF3D7_1364200	NUP205	kmeans	4	Cyan	273	Nucleoporin NUP205, putative
36329.A0A5K1K9B5	PF3D7_1363100	N/A	kmeans	4	Cyan	273	Uncharacterized protein
36329.A0A5K1K9B8	PF3D7_1364300	PRP16	kmeans	4	Cyan	273	Pre-mRNA-splicing factor ATP-dependent RNA helicase PRP16
36329.A0A5K1K9F8	PF3D7_1349500	N/A	kmeans	4	Cyan	273	Uncharacterized protein
36329.B9ZSJ1	PF3D7_0113200	N/A	kmeans	4	Cyan	273	Uncharacterized protein
36329.B9ZSJ3	PF3D7_0114100	MC-2TM	kmeans	4	Cyan	273	Pfmc-2TM Maurer's cleft two transmembrane protein
36329.B9ZSJ6	PF3D7_0419900	N/A	kmeans	4	Cyan	273	Phosphatidylinositol 4-kinase, putative; Belongs to the PI3/PI4-kinase family.
36329.C0H488	PF3D7_0403600	N/A	kmeans	4	Cyan	273	Uncharacterized protein
36329.C0H489	PF3D7_0405100	SEC24B	kmeans	4	Cyan	273	Protein transport protein Sec24B, putative
36329.C0H491	PF3D7_0406500	N/A	kmeans	4	Cyan	273	NYN domain-containing protein, putative
36329.C0H4A5	PF3D7_0414900	ARO	kmeans	4	Cyan	273	Armadillo-domain containing rhoptry protein
36329.C0H4F8	PF3D7_0522400	N/A	kmeans	4	Cyan	273	Uncharacterized protein
36329.C0H4K4	PF3D7_0704100	BTP2	kmeans	4	Cyan	273	Basal complex transmembrane protein 2
36329.C0H4L9	PF3D7_0707200	N/A	kmeans	4	Cyan	273	Uncharacterized protein
36329.C0H4M0	PF3D7_0707300	RAMA	kmeans	4	Cyan	273	Rhoptry-associated membrane antigen
36329.C0H4M2	PF3D7_0708000	N/A	kmeans	4	Cyan	273	Cytoskeleton associated protein, putative
36329.C0H4R1	PF3D7_0802600	ACbeta	kmeans	4	Cyan	273	Adenylyl cyclase beta
36329.C0H4S2	PF3D7_0806300	FLP	kmeans	4	Cyan	273	Ferlin-like protein, putative
36329.C0H4S6	PF3D7_0807200	N/A	kmeans	4	Cyan	273	Uncharacterized protein
36329.C0H4S8	PF3D7_0807600	N/A	kmeans	4	Cyan	273	Uncharacterized protein
36329.C0H4T0	PF3D7_0808100	N/A	kmeans	4	Cyan	273	AP-3 complex subunit delta, putative
36329.C0H4T3	PF3D7_0809600	N/A	kmeans	4	Cyan	273	Peptidase family C50, putative
36329.C0H4T6	PF3D7_0810300	PPM5	kmeans	4	Cyan	273	Protein phosphatase PPM5, putative
36329.C0H4U0	PF3D7_0811400	N/A	kmeans	4	Cyan	273	Uncharacterized protein
36329.C0H4U5	PF3D7_0813400	N/A	kmeans	4	Cyan	273	Uncharacterized protein
36329.C0H4V6	PF3D7_0818200	14-3-3I	kmeans	4	Cyan	273	14-3-3 protein; Belongs to the 14-3-3 family.
36329.C0H4W5	PF3D7_0821100	PK1	kmeans	4	Cyan	273	Protein kinase 1
36329.C0H516	PF3D7_0903200	RAB7	kmeans	4	Cyan	273	Ras-related protein RAB7
36329.C0H517	PF3D7_0903300	N/A	kmeans	4	Cyan	273	Uncharacterized protein
36329.C0H527	PF3D7_0908500	N/A	kmeans	4	Cyan	273	Uncharacterized protein
36329.C0H531	PF3D7_0910900	N/A	kmeans	4	Cyan	273	DNA primase large subunit; DNA primase is the polymerase that synthesizes small RNA primers for the Okazaki fragments made during discontinuous DNA replication; Belongs to the eukaryotic-type primase large subunit family.
36329.C0H536	PF3D7_0914100	N/A	kmeans	4	Cyan	273	Uncharacterized protein
36329.C0H545	PF3D7_0920000	ELO3	kmeans	4	Cyan	273	Elongation of fatty acids protein
36329.C0H552	PF3D7_0922800	N/A	kmeans	4	Cyan	273	Uncharacterized protein
36329.C0H571	PF3D7_0929400	RhopH2	kmeans	4	Cyan	273	High molecular weight rhoptry protein 2
36329.C0H584	PF3D7_0932100	N/A	kmeans	4	Cyan	273	Protein MAM3, putative
36329.C0H5A5	PF3D7_1308000	N/A	kmeans	4	Cyan	273	Uncharacterized protein
36329.C0H5H1	PF3D7_1344300	N/A	kmeans	4	Cyan	273	Zinc finger protein, putative
36329.C0H5J6	PF3D7_1361100	SEC24A	kmeans	4	Cyan	273	Protein transport protein Sec24A
36329.C0H5L6	PF3D7_1369400	N/A	kmeans	4	Cyan	273	Uncharacterized protein
36329.C6KSN9	PF3D7_0604100	SIP2	kmeans	4	Cyan	273	AP2 domain transcription factor
36329.C6KSP3	PF3D7_0604500	N/A	kmeans	4	Cyan	273	GYF domain-containing protein
36329.C6KSR4	PF3D7_0606600	N/A	kmeans	4	Cyan	273	Uncharacterized protein
36329.C6KSR5	PF3D7_0606700	N/A	kmeans	4	Cyan	273	Coatomer alpha subunit, putative
36329.C6KSS4	PF3D7_0607600	SAS6	kmeans	4	Cyan	273	Spindle assembly abnormal protein 6, putative
36329.C6KSS5	PF3D7_0607700	N/A	kmeans	4	Cyan	273	Protein PFF0380w
36329.C6KST6	PF3D7_0608900	N/A	kmeans	4	Cyan	273	Uncharacterized protein
36329.C6KSW2	PF3D7_0611800	N/A	kmeans	4	Cyan	273	Uncharacterized protein
36329.C6KSX6	PF3D7_0613300	ROP14	kmeans	4	Cyan	273	Rhoptry protein ROP14
36329.C6KSX8	PF3D7_0613600	N/A	kmeans	4	Cyan	273	Uncharacterized protein
36329.C6KSX9	PF3D7_0613700	N/A	kmeans	4	Cyan	273	Syntaxin-binding protein, putative; Belongs to the STXBP/unc-18/SEC1 family.
36329.C6KSY0	PF3D7_0613800	ApiAP2	kmeans	4	Cyan	273	AP2 domain transcription factor, putative
36329.C6KSY4	PF3D7_0614300	MFR1	kmeans	4	Cyan	273	Major facilitator superfamily-related transporter, putative
36329.C6KT49	PF3D7_0621100	N/A	kmeans	4	Cyan	273	Uncharacterized protein
36329.C6KT52	PF3D7_0621400	ALV7	kmeans	4	Cyan	273	Inner membrane complex protein 1j, putative
36329.C6KTD8	PF3D7_0630300	N/A	kmeans	4	Cyan	273	DNA polymerase epsilon catalytic subunit A, putative
36329.C6KTE5	PF3D7_0631000	N/A	kmeans	4	Cyan	273	Tetratricopeptide repeat protein, putative
36329.C6KTF7	PF3D7_0632500	VAR	kmeans	4	Cyan	273	Erythrocyte membrane protein 1, PfEMP1
36329.Q8IBZ9	PF3D7_0709000	CRT	kmeans	4	Cyan	273	Putative chloroquine resistance transporter; May regulate endogenous transporter; Belongs to the CRT-like transporter family.
36329.P62344	PF3D7_0217500	CDPK1	kmeans	4	Cyan	273	Calcium-dependent protein kinase 1; Calcium-dependent kinase which may phosphorylate proteins of the host erythrocyte membranes.
36329.Q8I4S2	PF3D7_1251200	N/A	kmeans	4	Cyan	273	Coronin; Belongs to the WD repeat coronin family.
36329.O77309	PF3D7_0302200	CLAG3.2	kmeans	4	Cyan	273	Cytoadherence linked asexual protein 3.2
36329.O77310	PF3D7_0302500	CLAG3.1	kmeans	4	Cyan	273	Cytoadherence linked asexual protein 3.1
36329.O77313	PF3D7_0303000	NSF	kmeans	4	Cyan	273	N-ethylmaleimide-sensitive fusion protein
36329.O77322	PF3D7_0308100	N/A	kmeans	4	Cyan	273	Zinc finger protein, putative
36329.O77324	PF3D7_0308300	PIC4	kmeans	4	Cyan	273	Uncharacterized protein
36329.O77326	PF3D7_0308700	N/A	kmeans	4	Cyan	273	Uncharacterized protein
36329.O77353	PF3D7_0311300	N/A	kmeans	4	Cyan	273	Phosphatidylinositol 3- and 4-kinase, putative
36329.O77368	PF3D7_0319000	ATPase7	kmeans	4	Cyan	273	P-type ATPase, putative
36329.O77385	PF3D7_0317200	CRK4	kmeans	4	Cyan	273	Cdc2-related protein kinase 4
36329.O77388	PF3D7_0316700	YOP1	kmeans	4	Cyan	273	Protein YOP1, putative
36329.O77389	PF3D7_0316600	FNT	kmeans	4	Cyan	273	Formate-nitrite transporter
36329.O96120	PF3D7_0201500	N/A	kmeans	4	Cyan	273	Uncharacterized protein
36329.O96134	PF3D7_0203100	N/A	kmeans	4	Cyan	273	Protein kinase, putative
36329.O96188	PF3D7_0210600	CERLI1	kmeans	4	Cyan	273	Uncharacterized protein
36329.O96191	PF3D7_0210900	N/A	kmeans	4	Cyan	273	Uncharacterized protein
36329.O96193	PF3D7_0211200	RAB5a	kmeans	4	Cyan	273	Ras-related protein Rab-5A
36329.O96197	PF3D7_0211700	TKL1	kmeans	4	Cyan	273	Tyrosine kinase-like protein, putative
36329.O96221	PF3D7_0214100	SEC31	kmeans	4	Cyan	273	Protein transport protein SEC31
36329.O96279	PF3D7_0220800	CLAG2	kmeans	4	Cyan	273	Cytoadherence linked asexual protein 2
36329.O97225	PF3D7_0303500	N/A	kmeans	4	Cyan	273	Spindle pole body protein, putative
36329.O97229	PF3D7_0304100	IMC1e	kmeans	4	Cyan	273	Inner membrane complex protein 1e, putative
36329.O97271	PF3D7_0315600	N/A	kmeans	4	Cyan	273	Zinc finger protein, putative
36329.O97287	PF3D7_0321100	N/A	kmeans	4	Cyan	273	Uncharacterized protein
36329.O97291	PF3D7_0321700	N/A	kmeans	4	Cyan	273	Uncharacterized protein
36329.O97323	PF3D7_0320100	SEC22	kmeans	4	Cyan	273	Protein transport protein SEC22; Belongs to the synaptobrevin family.
36329.Q8I423	PF3D7_0508000	P38	kmeans	4	Cyan	273	Merozoite surface protein P38
36329.Q6ZMA8	PF3D7_0406100	N/A	kmeans	4	Cyan	273	Vacuolar proton pump subunit B; Non-catalytic subunit of the peripheral V1 complex of vacuolar ATPase; Belongs to the ATPase alpha/beta chains family.
36329.Q7K6A5	PF3D7_0523000	MDR1	kmeans	4	Cyan	273	Multidrug resistance protein 1
36329.Q7KQK0	PF3D7_1223100	PKAr	kmeans	4	Cyan	273	cAMP-dependent protein kinase regulatory subunit
36329.Q7KQK5	PF3D7_1133400	AMA1	kmeans	4	Cyan	273	Apical membrane antigen 1
36329.Q8I0U6	PF3D7_0102200	RESA	kmeans	4	Cyan	273	Ring-infected erythrocyte surface antigen
36329.Q8I0U8	PF3D7_0930300	MSP1	kmeans	4	Cyan	273	Merozoite surface protein 1
36329.Q8I1Q1	PF3D7_0418600	N/A	kmeans	4	Cyan	273	Regulator of chromosome condensation, putative
36329.Q8I1Q2	PF3D7_0418500	BET3	kmeans	4	Cyan	273	Trafficking protein particle complex subunit; May play a role in vesicular transport from endoplasmic reticulum to Golgi.
36329.Q8I1S4	PF3D7_0416300	MCM9	kmeans	4	Cyan	273	DNA helicase MCM9, putative; Belongs to the MCM family.
36329.Q8I205	PF3D7_0402100	N/A	kmeans	4	Cyan	273	PRESAN domain-containing protein
36329.Q8I239	PF3D7_0110600	PIP5K	kmeans	4	Cyan	273	Phosphatidylinositol-4-phosphate 5-kinase
36329.Q8I280	PF3D7_0106100	N/A	kmeans	4	Cyan	273	V-type proton ATPase subunit C; Subunit of the peripheral V1 complex of vacuolar ATPase. Subunit C is necessary for the assembly of the catalytic sector of the enzyme and is likely to have a specific function in its catalytic activity. V-ATPase is responsible for acidifying a variety of intracellular compartments in eukaryotic cells.
36329.Q8I284	PF3D7_0105700	N/A	kmeans	4	Cyan	273	Asparagine-rich antigen Pfa35-2
36329.Q8I285	PF3D7_0105600	N/A	kmeans	4	Cyan	273	FtsJ domain-containing protein
36329.Q8I2G2	PF3D7_0935800	CLAG9	kmeans	4	Cyan	273	Cytoadherence linked asexual protein 9
36329.Q8I2K9	PF3D7_0930500	DGK1	kmeans	4	Cyan	273	Diacylglycerol kinase, putative
36329.Q8I2Q4	PF3D7_0925400	N/A	kmeans	4	Cyan	273	Serine/threonine-protein phosphatase
36329.Q8I2V4	PF3D7_0919900	RCC-PIP	kmeans	4	Cyan	273	Regulator of chromosome condensation-PP1-interacting protein
36329.Q8I2V8	PF3D7_0919500	MFS3	kmeans	4	Cyan	273	Major facilitator superfamily domain-containing protein, putative
36329.Q8I2Z2	PF3D7_0916000	MFS2	kmeans	4	Cyan	273	Major facilitator superfamily domain-containing protein, putative
36329.Q8I390	PF3D7_0905900	SEC27	kmeans	4	Cyan	273	Coatomer subunit beta; The coatomer is a cytosolic protein complex that binds to dilysine motifs and reversibly associates with Golgi non-clathrin- coated vesicles, which further mediate biosynthetic protein transport from the ER, via the Golgi up to the trans Golgi network. Coatomer complex is required for budding from Golgi membranes, and is essential for the retrograde Golgi-to-ER transport of…
36329.Q8I395	PF3D7_0905400	RhopH3	kmeans	4	Cyan	273	High molecular weight rhoptry protein 3
36329.Q8I3F7	PF3D7_0531100	N/A	kmeans	4	Cyan	273	Uncharacterized protein
36329.Q8I3F9	PF3D7_0530900	FRM1	kmeans	4	Cyan	273	Formin 1
36329.Q8I3I3	PF3D7_0528400	DHHC7	kmeans	4	Cyan	273	Palmitoyltransferase; Belongs to the DHHC palmitoyltransferase family.
36329.Q8I3K7	PF3D7_0525800	IMC1g	kmeans	4	Cyan	273	Inner membrane complex protein 1g, putative
36329.Q8I3N4	PF3D7_0522900	N/A	kmeans	4	Cyan	273	Zinc finger protein, putative
36329.Q8I3N7	PF3D7_0522600	N/A	kmeans	4	Cyan	273	Inner membrane complex protein
36329.Q8I3U0	PF3D7_0516800	ApiAP2	kmeans	4	Cyan	273	AP2 domain transcription factor AP2-O2, putative
36329.Q8I3V1	PF3D7_0515700	GAP40	kmeans	4	Cyan	273	Glideosome-associated protein 40, putative
36329.Q8I3V5	PF3D7_0515300	PI3K	kmeans	4	Cyan	273	Phosphatidylinositol 3-kinase
36329.Q8I3W6	PF3D7_0514100	UvrD	kmeans	4	Cyan	273	ATP-dependent DNA helicase UvrD
36329.Q8I3Z1	PF3D7_0511500	N/A	kmeans	4	Cyan	273	MATH and LRR domain-containing protein PFE0570w
36329.Q8I406	PF3D7_0509800	PI4KB	kmeans	4	Cyan	273	Phosphatidylinositol 4-kinase; Belongs to the PI3/PI4-kinase family.
36329.Q8I414	PF3D7_0508900	AAP6	kmeans	4	Cyan	273	Uncharacterized protein
36329.Q8I433	PF3D7_0506900	ROM4	kmeans	4	Cyan	273	RHOMBOID-like protein
36329.Q8I469	PF3D7_0503200	CDC6	kmeans	4	Cyan	273	ATPase_AAA_core domain-containing protein
36329.Q8I480	PF3D7_0502000	VPS11	kmeans	4	Cyan	273	RING finger protein PFE0100w
36329.Q8I484	PF3D7_0501600	RAP2	kmeans	4	Cyan	273	Rhoptry-associated protein 2
36329.Q8I4R5	PF3D7_1252100	RON3	kmeans	4	Cyan	273	Rhoptry neck protein 3
36329.Q8I4S6	PF3D7_1250800	N/A	kmeans	4	Cyan	273	DNA repair protein rhp16, putative
36329.Q8I4V7	PF3D7_1247500	N/A	kmeans	4	Cyan	273	Serine/threonine protein kinase, putative
36329.Q8I4W8	PF3D7_1246400	MTIP	kmeans	4	Cyan	273	Myosin A tail domain interacting protein
36329.Q8I525	PF3D7_1239800	N/A	kmeans	4	Cyan	273	Uncharacterized protein
36329.Q8I531	PF3D7_1239200	ApiAP2	kmeans	4	Cyan	273	AP2 domain transcription factor, putative
36329.Q8I570	PF3D7_1235200	VP2	kmeans	4	Cyan	273	V-type K+-independent H+-translocating inorganic pyrophosphatase
36329.Q8I5D4	PF3D7_1228400	N/A	kmeans	4	Cyan	273	Uncharacterized protein
36329.Q8I5D5	PF3D7_1228300	NEK1	kmeans	4	Cyan	273	NIMA related kinase 1
36329.Q8I5E3	PF3D7_1227500	SOC2	kmeans	4	Cyan	273	Protein SOC2, putative
36329.Q8I5G0	PF3D7_1225700	N/A	kmeans	4	Cyan	273	VAC14 domain-containing protein, putative
36329.Q8I5H6	PF3D7_1224100	N/A	kmeans	4	Cyan	273	Uncharacterized protein
36329.Q8I5I8	PF3D7_1222700	GAP45	kmeans	4	Cyan	273	Glideosome-associated protein 45
36329.Q8I5K0	PF3D7_1221300	N/A	kmeans	4	Cyan	273	Uncharacterized protein
36329.Q8I5L6	PF3D7_1219100	CHC	kmeans	4	Cyan	273	Clathrin heavy chain; Clathrin is the major protein of the polyhedral coat of coated pits and vesicles; Belongs to the clathrin heavy chain family.
36329.Q8I5M5	PF3D7_1218300	AP2-MU	kmeans	4	Cyan	273	AP-2 complex subunit mu, putative; Belongs to the adaptor complexes medium subunit family.
36329.Q8I5S7	PF3D7_1212500	GAT	kmeans	4	Cyan	273	Glycerol-3-phosphate 1-O-acyltransferase
36329.Q8I6T3	PF3D7_1328100	N/A	kmeans	4	Cyan	273	Proteasome subunit beta; The proteasome is a multicatalytic proteinase complex which is characterized by its ability to cleave peptides with Arg, Phe, Tyr, Leu, and Glu adjacent to the leaving group at neutral or slightly basic pH; Belongs to the peptidase T1B family.
36329.Q8I6V3	PF3D7_1408000	PMII	kmeans	4	Cyan	273	Plasmepsin II; Belongs to the peptidase A1 family.
36329.Q8IAM0	PF3D7_0802000	GDH3	kmeans	4	Cyan	273	Glutamate dehydrogenase, putative
36329.Q8IAM1	PF3D7_0802100	AP2-LT	kmeans	4	Cyan	273	AP2 domain transcription factor, putative
36329.Q8IAN4	PF3D7_0803400	RAD54	kmeans	4	Cyan	273	DNA repair and recombination protein RAD54, putative
36329.Q8IAQ8	PF3D7_0806800	N/A	kmeans	4	Cyan	273	V-type proton ATPase subunit a, putative
36329.Q8IAV6	PF3D7_0812100	N/A	kmeans	4	Cyan	273	Proteasome activator complex subunit 4, putative
36329.Q8IAY2	PF3D7_0814500	N/A	kmeans	4	Cyan	273	Uncharacterized protein
36329.Q8IB16	PF3D7_0818100	N/A	kmeans	4	Cyan	273	Zinc finger protein, putative
36329.Q8IB44	PF3D7_0821000	N/A	kmeans	4	Cyan	273	Uncharacterized protein
36329.Q8IB63	PF3D7_0822900	PIC2	kmeans	4	Cyan	273	Uncharacterized protein
36329.Q8IB64	PF3D7_0823000	VPS15	kmeans	4	Cyan	273	Serine/threonine protein kinase VPS15, putative
36329.Q8IBF4	PF3D7_0730500	N/A	kmeans	4	Cyan	273	Uncharacterized protein
36329.Q8IBH6	PF3D7_0728100	N/A	kmeans	4	Cyan	273	Anaphase-promoting complex subunit 1, putative
36329.Q8IBK1	PF3D7_0725000	N/A	kmeans	4	Cyan	273	Exonuclease I, putative
36329.Q8IBL5	PF3D7_0723800	N/A	kmeans	4	Cyan	273	Uncharacterized protein
36329.Q8IBN1	PF3D7_0722200	RALP1	kmeans	4	Cyan	273	Rhoptry-associated leucine zipper-like protein 1
36329.Q8IBU8	PF3D7_0715200	N/A	kmeans	4	Cyan	273	Uncharacterized protein
36329.Q8IC15	PF3D7_0705500	N/A	kmeans	4	Cyan	273	Inositol-phosphate phosphatase, putative
36329.Q8IC22	PF3D7_0704800	PPM12	kmeans	4	Cyan	273	Protein phosphatase PPM12, putative
36329.Q8ID22	PF3D7_1368800	ERCC4	kmeans	4	Cyan	273	DNA repair endonuclease XPF, putative
36329.Q8ID94	PF3D7_1361200	N/A	kmeans	4	Cyan	273	Uncharacterized protein MAL13P1.304
36329.Q8IDD4	PF3D7_1356800	ARK3	kmeans	4	Cyan	273	Serine/threonine protein kinase, putative
36329.Q8IDE1	PF3D7_1356100	N/A	kmeans	4	Cyan	273	Uncharacterized protein
36329.Q8IDG3	PF3D7_1353800	N/A	kmeans	4	Cyan	273	Proteasome subunit alpha type
36329.Q8IDQ5	PF3D7_1343400	RAD5	kmeans	4	Cyan	273	DNA repair protein RAD5, putative
36329.Q8IDQ8	PF3D7_1343100	N/A	kmeans	4	Cyan	273	Uncharacterized protein
36329.Q8IDX8	PF3D7_1335100	MSP7	kmeans	4	Cyan	273	Merozoite surface protein 7
36329.Q8IE65	PF3D7_1325400	N/A	kmeans	4	Cyan	273	Uncharacterized protein
36329.Q8IEA7	PF3D7_1320700	N/A	kmeans	4	Cyan	273	Uncharacterized protein
36329.Q8IEC9	PF3D7_1318700	AAP4	kmeans	4	Cyan	273	Uncharacterized protein
36329.Q8IEE5	PF3D7_1317100	MCM4	kmeans	4	Cyan	273	DNA replication licensing factor MCM4; Belongs to the MCM family.
36329.Q8IEH2	PF3D7_1314200	TERT	kmeans	4	Cyan	273	Telomerase reverse transcriptase; Telomerase is a ribonucleoprotein enzyme essential for the replication of chromosome termini in most eukaryotes. It elongates telomeres. It is a reverse transcriptase that adds simple sequence repeats to chromosome ends by copying a template sequence within the RNA component of the enzyme.
36329.Q8IEH7	PF3D7_1313600	N/A	kmeans	4	Cyan	273	Clu domain-containing protein
36329.Q8IEK3	PF3D7_1311500	RPT1	kmeans	4	Cyan	273	26S protease regulatory subunit 7, putative; Belongs to the AAA ATPase family.
36329.Q8IEK9	PF3D7_1310700	PIC5	kmeans	4	Cyan	273	RNA-binding protein, putative
36329.Q8IFN1	PF3D7_0423500	GAPM2	kmeans	4	Cyan	273	Glideosome associated protein with multiple membrane spans 2
36329.Q8IFP1	PF3D7_0422500	BRR2	kmeans	4	Cyan	273	Pre-mRNA-splicing helicase BRR2, putative
36329.Q8IHN1	PF3D7_1149200	RESA3	kmeans	4	Cyan	273	Ring-infected erythrocyte surface antigen
36329.Q8IHR5	PF3D7_1145200	N/A	kmeans	4	Cyan	273	Serine/threonine protein kinase, putative
36329.Q8IHT5	PF3D7_1143100	AP2-O	kmeans	4	Cyan	273	AP2 domain transcription factor AP2-O, putative
36329.Q8IHV9	PF3D7_1140600	N/A	kmeans	4	Cyan	273	Uncharacterized protein
36329.Q8IHW1	PF3D7_1140400	N/A	kmeans	4	Cyan	273	Uncharacterized protein
36329.Q8IHY1	PF3D7_1138400	GCalpha	kmeans	4	Cyan	273	Guanylyl cyclase
36329.Q8IHY4	PF3D7_1138000	N/A	kmeans	4	Cyan	273	Uncharacterized protein
36329.Q8II70	PF3D7_1129300	N/A	kmeans	4	Cyan	273	Uncharacterized protein
36329.Q8II71	PF3D7_1129200	RPN7	kmeans	4	Cyan	273	26S proteasome regulatory subunit RPN7, putative
36329.Q8II92	PF3D7_1127100	dUTPase	kmeans	4	Cyan	273	Deoxyuridine 5'-triphosphate nucleotidohydrolase
36329.Q8II97	PF3D7_1126700	ATG23	kmeans	4	Cyan	273	Autophagy-related protein 23, putative
36329.Q8IIB7	PF3D7_1124600	EK	kmeans	4	Cyan	273	Ethanolamine kinase
36329.Q8IIF4	PF3D7_1121300	TKL2	kmeans	4	Cyan	273	Tyrosine kinase-like protein
36329.Q8IIH7	PF3D7_1119000	N/A	kmeans	4	Cyan	273	Acyl-CoA-binding protein, putative
36329.Q8IIK5	PF3D7_1116000	RON4	kmeans	4	Cyan	273	Rhoptry neck protein 4
36329.Q8IIL3	PF3D7_1114900	N/A	kmeans	4	Cyan	273	Uncharacterized protein
36329.Q8IIN2	PF3D7_1113000	N/A	kmeans	4	Cyan	273	Uncharacterized protein
36329.Q8IIP2	PF3D7_1112100	N/A	kmeans	4	Cyan	273	Protein kinase domain-containing protein
36329.Q8IIS8	PF3D7_1107400	RAD51	kmeans	4	Cyan	273	DNA repair protein RAD51 homolog; Binds to single and double-stranded DNA and exhibits DNA- dependent ATPase activity. Underwinds duplex DNA. ; Belongs to the RecA family. RAD51 subfamily.
36329.Q8IIV3	PF3D7_1104900	N/A	kmeans	4	Cyan	273	Calcium/calmodulin-dependent protein kinase, putative
36329.Q8IJ32	PF3D7_1037500	DYN2	kmeans	4	Cyan	273	Dynamin-like protein; Belongs to the TRAFAC class dynamin-like GTPase superfamily. Dynamin/Fzo/YdjA family.
36329.Q8IJ49	PF3D7_1035900	MAAP	kmeans	4	Cyan	273	PUM-HD domain-containing protein
36329.Q8IJ56	PF3D7_1035300	GLURP	kmeans	4	Cyan	273	Glutamate-rich protein GLURP
36329.Q8IJA3	PF3D7_1030200	CLAMP	kmeans	4	Cyan	273	Claudin-like apicomplexan microneme protein, putative
36329.Q8IJA6	PF3D7_1029900	N/A	kmeans	4	Cyan	273	Uncharacterized protein
36329.Q8IJF4	PF3D7_1025000	EPS15	kmeans	4	Cyan	273	EF-hand calcium-binding domain-containing protein, putative
36329.Q8IJK2	PF3D7_1019900	ATG8	kmeans	4	Cyan	273	Autophagy-related protein; Belongs to the ATG8 family.
36329.Q8IJK6	PF3D7_1019600	N/A	kmeans	4	Cyan	273	PH domain-containing protein
36329.Q8IJL1	PF3D7_1019100	N/A	kmeans	4	Cyan	273	Uncharacterized protein
36329.Q8IJM0	PF3D7_1017900	RPN5	kmeans	4	Cyan	273	26S proteasome regulatory subunit p55, putative
36329.Q8IJP6	PF3D7_1014900	KIC8	kmeans	4	Cyan	273	Uncharacterized protein
36329.Q8IJR0	PF3D7_1013500	PI-PLC	kmeans	4	Cyan	273	Phosphoinositide phospholipase C
36329.Q8IJT1	PF3D7_1011400	N/A	kmeans	4	Cyan	273	Proteasome subunit beta; The proteasome is a multicatalytic proteinase complex which is characterized by its ability to cleave peptides with Arg, Phe, Tyr, Leu, and Glu adjacent to the leaving group at neutral or slightly basic pH; Belongs to the peptidase T1B family.
36329.Q8IK01	PF3D7_1003600	IMC1c	kmeans	4	Cyan	273	Inner membrane complex protein 1c, putative
36329.Q8IK06	PF3D7_1003000	N/A	kmeans	4	Cyan	273	Uncharacterized protein
36329.Q8IKC5	PF3D7_1471400	N/A	kmeans	4	Cyan	273	Diacylglycerol kinase
36329.Q8IKD7	PF3D7_1470100	N/A	kmeans	4	Cyan	273	Uncharacterized protein
36329.Q8IKJ0	PF3D7_1464700	N/A	kmeans	4	Cyan	273	V-type proton ATPase subunit; Subunit of the integral membrane V0 complex of vacuolar ATPase. Vacuolar ATPase is responsible for acidifying a variety of intracellular compartments in eukaryotic cells, thus providing most of the energy required for transport processes in the vacuolar system. ; Belongs to the V-ATPase V0D/AC39 subunit family.
36329.Q8IKL8	PF3D7_1461400	N/A	kmeans	4	Cyan	273	MORN repeat protein, putative
36329.Q8IKM6	PF3D7_1460600	ISP3	kmeans	4	Cyan	273	Inner membrane complex sub-compartment protein 3
36329.Q8IKM7	PF3D7_1460500	N/A	kmeans	4	Cyan	273	Uncharacterized protein
36329.Q8IKN0	PF3D7_1460100	FCP	kmeans	4	Cyan	273	FYVE and coiled-coil domain-containing protein
36329.Q8IKS5	PF3D7_1455300	N/A	kmeans	4	Cyan	273	Uncharacterized protein
36329.Q8IKV6	PF3D7_1452000	RON2	kmeans	4	Cyan	273	Rhoptry neck protein 2
36329.Q8IKY8	PF3D7_1448500	N/A	kmeans	4	Cyan	273	DNMT1-RFD domain-containing protein
36329.Q8IL41	PF3D7_1443000	SRPK2	kmeans	4	Cyan	273	Serine/threonine protein kinase
36329.Q8IL63	PF3D7_1440700	AP3M	kmeans	4	Cyan	273	AP-3 complex subunit mu, putative; Belongs to the adaptor complexes medium subunit family.
36329.Q8IL69	PF3D7_1440100	N/A	kmeans	4	Cyan	273	Rad21_Rec8_N domain-containing protein
36329.Q8IL94	PF3D7_1437200	N/A	kmeans	4	Cyan	273	Ribonucleoside-diphosphate reductase; Provides the precursors necessary for DNA synthesis. Catalyzes the biosynthesis of deoxyribonucleotides from the corresponding ribonucleotides.
36329.Q8ILA2	PF3D7_1436200	BCP1	kmeans	4	Cyan	273	Basal complex protein BCP1
36329.Q8ILA8	PF3D7_1435600	N/A	kmeans	4	Cyan	273	Uncharacterized protein
36329.Q8ILB1	PF3D7_1435300	N/A	kmeans	4	Cyan	273	Glutamate synthase [NADH], putative
36329.Q8ILG1	PF3D7_1430300	N/A	kmeans	4	Cyan	273	Acid phosphatase, putative; Belongs to the histidine acid phosphatase family.
36329.Q8ILL9	PF3D7_1423300	PP7	kmeans	4	Cyan	273	Serine/threonine-protein phosphatase
36329.Q8ILS3	PF3D7_1417300	ATG4	kmeans	4	Cyan	273	Cysteine protease ATG4, putative
36329.Q8ILX0	PF3D7_1412400	N/A	kmeans	4	Cyan	273	Uncharacterized protein
36329.Q8ILZ1	PF3D7_1410400	RAP1	kmeans	4	Cyan	273	Rhoptry-associated protein 1
36329.Q8IM01	PF3D7_1409400	N/A	kmeans	4	Cyan	273	Uncharacterized protein
36329.Q8IM26	PF3D7_1406800	GAPM3	kmeans	4	Cyan	273	Glideosome associated protein with multiple membrane spans 3
36329.Q9TY98	PF3D7_0204100	N/A	kmeans	4	Cyan	273	Sel1 repeat-containing protein, putative
36329.Q9TY99	PF3D7_0202000	KAHRP	kmeans	4	Cyan	273	Knob-associated histidine-rich protein
36329.Q9U0H1	PF3D7_0411900	N/A	kmeans	4	Cyan	273	DNA polymerase
36329.Q9U0K9	PF3D7_0407700	N/A	kmeans	4	Cyan	273	Uncharacterized protein
36329.Q9U0N4	PF3D7_0112200	MRP1	kmeans	4	Cyan	273	Multidrug resistance-associated protein 1
36329.Q9TY95	PF3D7_0207600	SERA5	kmeans	4	Cyan	273	Serine-repeat antigen protein; It may function at the red blood cell membrane, perhaps as a component that influences the invasion process; Belongs to the peptidase C1 family.
36329.Q8IKV1	PF3D7_1452500	STX6	kmeans	4	Cyan	273	Syntaxin-6, putative
36329.Q76NM6	PF3D7_1311900	vapA	kmeans	4	Cyan	273	V-type proton ATPase catalytic subunit A; Catalytic subunit of the peripheral V1 complex of vacuolar ATPase. V-ATPase vacuolar ATPase is responsible for acidifying a variety of intracellular compartments in eukaryotic cells; Belongs to the ATPase alpha/beta chains family.
