# Supplementary material for: Complementary crosstalk between palmitoylation and phosphorylation events in MTIP regulates its role during Plasmodium falciparum invasion
Source: Front Cell Infect Microbiol. 2022 Sep 29;12:924424. doi: 10.3389/fcimb.2022.924424 (PMC9556994; doi:10.3389/fcimb.2022.924424)
Supplement: Supplementary Table 8 — PTM hotspot regions in all the modifiable proteins acquired from curated datasets/databases and prediction results, including PTM events and hotspots distribution on dually modified Plasmodium falciparum 3D7 proteins essential for its survival. [file Table_8.xlsx]

## Sheet: PF3D7_ALLPTMHOTSPOTS
Protein.ID	Start	End	PTM.Events	PTM.Events.Positions	Hotspot.Length	IF.Dually.Modified
PF3D7_0102200.1	22	35	3	27, 29, 30	14	No
PF3D7_0102200.1	71	94	6	75, 76, 81, 85, 89, 92	24	No
PF3D7_0102200.1	114	129	3	119, 121, 124	16	No
PF3D7_0102200.1	212	226	5	217, 218, 219, 221, 225	15	No
PF3D7_0102200.1	287	309	6	287, 292, 293, 300, 303, 304	23	No
PF3D7_0102200.1	377	387	3	378, 382, 384	11	No
PF3D7_0102200.1	399	415	4	404, 405, 409, 410	17	No
PF3D7_0102200.1	424	439	3	429, 430, 434	16	No
PF3D7_0102200.1	505	516	4	505, 510, 511, 516	12	No
PF3D7_0102200.1	546	564	5	550, 551, 556, 558, 559	19	No
PF3D7_0102200.1	711	724	4	711, 716, 717, 719	14	No
PF3D7_0102200.1	774	789	5	775, 779, 782, 783, 784	16	No
PF3D7_0102200.1	796	808	4	796, 801, 803, 808	13	No
PF3D7_0102200.1	816	826	3	818, 821, 826	11	No
PF3D7_0102200.1	833	844	4	833, 838, 839, 844	12	No
PF3D7_0102500.1	52	62	3	55, 57, 62	11	No
PF3D7_0102500.1	114	129	4	114, 119, 124, 125	16	No
PF3D7_0102500.1	129	142	3	134, 135, 137	14	No
PF3D7_0102500.1	163	178	4	168, 170, 172, 173	16	No
PF3D7_0102500.1	420	433	3	425, 427, 428	14	No
PF3D7_0102500.1	518	528	3	518, 523, 526	11	No
PF3D7_0102500.1	737	756	5	742, 745, 747, 751, 754	20	No
PF3D7_0102500.1	763	778	4	763, 768, 770, 773	16	No
PF3D7_0102500.1	792	807	4	794, 797, 802, 806	16	No
PF3D7_0102500.1	809	826	4	814, 816, 818, 821	18	No
PF3D7_0102500.1	842	858	4	847, 848, 850, 853	17	No
PF3D7_0102500.1	910	925	4	913, 915, 920, 921	16	No
PF3D7_0102500.1	937	972	12	942, 943, 944, 952, 953, 954, 958, 959, 962, 965, 966, 967	36	No
PF3D7_0102500.1	994	1006	4	995, 999, 1001, 1006	13	No
PF3D7_0102500.1	1018	1031	4	1023, 1024, 1026, 1030	14	No
PF3D7_0102500.1	1033	1048	4	1037, 1038, 1043, 1045	16	No
PF3D7_0102500.1	1053	1085	9	1058, 1059, 1063, 1066, 1068, 1070, 1075, 1080, 1081	33	No
PF3D7_0102500.1	1091	1108	5	1096, 1098, 1100, 1101, 1103	18	No
PF3D7_0102500.1	1113	1150	11	1114, 1118, 1123, 1125, 1126, 1131, 1136, 1138, 1141, 1145, 1149	38	No
PF3D7_0102500.1	1164	1178	4	1169, 1171, 1173, 1178	15	No
PF3D7_0102500.1	1186	1210	6	1189, 1191, 1195, 1200, 1201, 1205	25	No
PF3D7_0102500.1	1244	1259	3	1249, 1251, 1254	16	No
PF3D7_0102500.1	1295	1305	3	1299, 1300, 1305	11	No
PF3D7_0102500.1	1307	1322	3	1312, 1315, 1317	16	No
PF3D7_0102500.1	1364	1393	7	1369, 1372, 1374, 1379, 1383, 1387, 1388	30	No
PF3D7_0102500.1	1408	1429	6	1413, 1415, 1417, 1421, 1424, 1427	22	No
PF3D7_0102800.1	339	351	3	344, 345, 346	13	No
PF3D7_0103200.1	227	246	5	231, 232, 237, 241, 244	20	No
PF3D7_0103300.1	113	128	3	118, 122, 123	16	No
PF3D7_0103300.1	274	288	3	279, 280, 283	15	No
PF3D7_0103300.1	327	337	3	329, 332, 335	11	No
PF3D7_0103300.1	410	425	4	414, 415, 420, 421	16	No
PF3D7_0103300.1	463	473	3	465, 468, 471	11	No
PF3D7_0103300.1	744	759	4	744, 749, 752, 754	16	No
PF3D7_0103400.1	312	326	6	312, 317, 318, 320, 321, 326	15	No
PF3D7_0103400.1	376	390	4	379, 381, 385, 387	15	No
PF3D7_0103400.1	407	417	3	408, 412, 417	11	No
PF3D7_0103400.1	568	578	3	569, 573, 576	11	No
PF3D7_0103400.1	581	596	4	586, 587, 588, 591	16	No
PF3D7_0103400.1	824	838	3	829, 832, 833	15	No
PF3D7_0103400.1	1031	1045	3	1036, 1038, 1040	15	No
PF3D7_0103400.1	1388	1398	3	1392, 1393, 1398	11	No
PF3D7_0103400.1	1582	1612	10	1585, 1587, 1591, 1593, 1597, 1599, 1601, 1605, 1607, 1611	31	No
PF3D7_0103900.1	60	74	3	65, 66, 69	15	No
PF3D7_0103900.1	127	151	7	132, 134, 136, 141, 142, 143, 146	25	No
PF3D7_0103900.1	202	216	4	207, 208, 211, 215	15	No
PF3D7_0103900.1	241	251	3	243, 246, 250	11	No
PF3D7_0103900.1	299	317	4	304, 308, 309, 312	19	No
PF3D7_0104100.1	611	628	4	616, 618, 619, 623	18	No
PF3D7_0104300.1	35	49	3	40, 43, 44	15	No
PF3D7_0104300.1	111	130	6	113, 116, 119, 121, 123, 125	20	No
PF3D7_0104300.1	131	166	9	136, 137, 140, 149, 150, 152, 159, 160, 161	36	No
PF3D7_0104300.1	214	236	7	214, 219, 220, 225, 227, 231, 234	23	No
PF3D7_0104300.1	273	291	5	278, 279, 281, 283, 286	19	No
PF3D7_0104300.1	400	415	3	405, 408, 410	16	No
PF3D7_0104300.1	501	511	3	503, 506, 511	11	No
PF3D7_0104300.1	573	593	7	578, 579, 580, 582, 584, 587, 588	21	No
PF3D7_0104300.1	604	614	3	604, 609, 611	11	No
PF3D7_0104300.1	674	688	3	679, 682, 683	15	No
PF3D7_0104300.1	725	735	3	725, 730, 731	11	No
PF3D7_0104300.1	801	821	8	806, 807, 809, 810, 811, 813, 816, 821	21	No
PF3D7_0104300.1	829	839	3	831, 834, 838	11	No
PF3D7_0104300.1	858	878	6	860, 863, 867, 868, 870, 873	21	Yes
PF3D7_0104300.1	878	891	3	883, 885, 886	14	No
PF3D7_0104300.1	940	954	4	945, 947, 948, 949	15	No
PF3D7_0104300.1	956	966	3	956, 961, 962	11	No
PF3D7_0104300.1	1092	1110	5	1093, 1097, 1102, 1103, 1105	19	No
PF3D7_0104300.1	1163	1189	8	1163, 1168, 1172, 1173, 1176, 1179, 1184, 1185	27	No
PF3D7_0104300.1	1230	1243	3	1235, 1237, 1238	14	No
PF3D7_0104300.1	1265	1281	5	1270, 1272, 1274, 1276, 1280	17	No
PF3D7_0104300.1	1376	1396	5	1381, 1385, 1386, 1390, 1391	21	No
PF3D7_0104300.1	1441	1451	3	1441, 1446, 1447	11	No
PF3D7_0104300.1	1466	1479	4	1471, 1472, 1473, 1474	14	No
PF3D7_0104300.1	1519	1532	4	1521, 1524, 1527, 1530	14	No
PF3D7_0104300.1	1603	1617	3	1608, 1609, 1612	15	No
PF3D7_0104300.1	1665	1681	5	1665, 1670, 1672, 1675, 1676	17	No
PF3D7_0104300.1	1859	1874	4	1863, 1864, 1869, 1873	16	No
PF3D7_0104300.1	1877	1887	3	1879, 1882, 1886	11	No
PF3D7_0104300.1	1974	1990	4	1979, 1983, 1984, 1985	17	No
PF3D7_0104300.1	2000	2014	4	2002, 2005, 2009, 2013	15	No
PF3D7_0104300.1	2070	2088	6	2071, 2075, 2078, 2082, 2083, 2088	19	No
PF3D7_0104300.1	2252	2262	3	2252, 2257, 2259	11	No
PF3D7_0104300.1	2268	2291	7	2273, 2275, 2276, 2281, 2283, 2285, 2286	24	No
PF3D7_0104300.1	2337	2352	3	2342, 2344, 2347	16	No
PF3D7_0104300.1	2543	2555	3	2548, 2549, 2550	13	No
PF3D7_0104300.1	2557	2572	3	2562, 2566, 2567	16	No
PF3D7_0104300.1	2588	2603	4	2593, 2597, 2598, 2603	16	No
PF3D7_0104300.1	2629	2643	3	2634, 2635, 2638	15	No
PF3D7_0104300.1	2724	2736	4	2724, 2729, 2730, 2731	13	No
PF3D7_0104300.1	2736	2771	10	2741, 2743, 2744, 2751, 2753, 2757, 2760, 2762, 2765, 2766	36	No
PF3D7_0104300.1	2791	2801	3	2791, 2796, 2798	11	No
PF3D7_0104300.1	2821	2836	4	2822, 2826, 2831, 2832	16	No
PF3D7_0104300.1	2846	2863	7	2846, 2851, 2852, 2853, 2855, 2856, 2858	18	No
PF3D7_0104300.1	2872	2882	3	2874, 2877, 2882	11	No
PF3D7_0104300.1	2910	2926	4	2915, 2916, 2917, 2921	17	No
PF3D7_0104300.1	2927	2937	3	2927, 2932, 2936	11	No
PF3D7_0104300.1	2963	2982	6	2968, 2972, 2973, 2974, 2975, 2977	20	No
PF3D7_0104300.1	2985	3006	7	2985, 2990, 2995, 2997, 2999, 3001, 3006	22	No
PF3D7_0104300.1	3327	3337	3	3331, 3332, 3337	11	No
PF3D7_0104300.1	3445	3463	5	3450, 3451, 3453, 3458, 3461	19	No
PF3D7_0104800.1	75	93	4	80, 83, 85, 88	19	No
PF3D7_0104800.1	254	272	5	259, 261, 262, 266, 267	19	No
PF3D7_0104800.1	339	353	4	341, 344, 347, 348	15	No
PF3D7_0105200.1	18	32	4	18, 23, 26, 27	15	No
PF3D7_0105200.1	407	417	3	409, 412, 415	11	No
PF3D7_0105200.1	557	568	3	562, 564, 567	12	No
PF3D7_0105700.1	37	50	4	39, 42, 45, 48	14	No
PF3D7_0105700.1	137	151	4	142, 143, 146, 149	15	No
PF3D7_0105700.1	232	264	11	237, 238, 242, 244, 247, 250, 252, 253, 254, 256, 259	33	No
PF3D7_0105700.1	364	378	3	369, 372, 373	15	No
PF3D7_0105700.1	486	498	5	486, 491, 492, 493, 498	13	No
PF3D7_0105700.1	528	538	3	529, 533, 537	11	No
PF3D7_0105700.1	578	588	3	580, 583, 588	11	No
PF3D7_0105700.1	596	608	3	601, 602, 603	13	No
PF3D7_0105700.1	623	642	5	628, 631, 633, 636, 637	20	No
PF3D7_0105700.1	651	666	3	656, 660, 661	16	No
PF3D7_0105700.1	684	699	3	689, 692, 694	16	No
PF3D7_0105700.1	791	805	3	796, 799, 800	15	No
PF3D7_0105700.1	812	827	4	817, 818, 822, 825	16	No
PF3D7_0105700.1	857	877	5	862, 866, 867, 872, 873	21	No
PF3D7_0105700.1	892	906	3	897, 898, 901	15	No
PF3D7_0105700.1	1200	1221	6	1205, 1209, 1210, 1214, 1215, 1216	22	No
PF3D7_0105700.1	1333	1343	3	1335, 1338, 1341	11	No
PF3D7_0105700.1	1360	1392	10	1365, 1366, 1367, 1370, 1379, 1380, 1382, 1383, 1384, 1387	33	No
PF3D7_0105700.1	1412	1422	3	1416, 1417, 1422	11	No
PF3D7_0105700.1	1434	1457	7	1439, 1443, 1444, 1447, 1448, 1451, 1452	24	No
PF3D7_0105700.1	1532	1545	3	1537, 1539, 1540	14	No
PF3D7_0105700.1	1712	1725	3	1717, 1718, 1720	14	No
PF3D7_0105700.1	1725	1744	6	1730, 1732, 1733, 1735, 1736, 1739	20	No
PF3D7_0105700.1	1745	1763	6	1746, 1750, 1753, 1755, 1756, 1758	19	No
PF3D7_0105700.1	1801	1811	3	1801, 1806, 1811	11	No
PF3D7_0105700.1	1853	1870	5	1853, 1858, 1861, 1862, 1865	18	No
PF3D7_0105700.1	1955	1970	4	1960, 1961, 1965, 1969	16	No
PF3D7_0105700.1	1996	2012	5	2001, 2002, 2004, 2007, 2011	17	No
PF3D7_0105700.1	2085	2101	5	2085, 2090, 2092, 2094, 2096	17	No
PF3D7_0105700.1	2146	2168	6	2150, 2151, 2156, 2161, 2162, 2163	23	No
PF3D7_0105700.1	2304	2322	7	2309, 2311, 2312, 2313, 2316, 2317, 2322	19	No
PF3D7_0105700.1	2390	2416	9	2395, 2397, 2400, 2401, 2403, 2404, 2408, 2411, 2414	27	No
PF3D7_0105700.1	2419	2436	5	2424, 2426, 2427, 2431, 2435	18	No
PF3D7_0105700.1	2478	2503	6	2480, 2483, 2488, 2493, 2498, 2502	26	No
PF3D7_0105700.1	2525	2537	3	2530, 2531, 2532	13	No
PF3D7_0105700.1	2608	2620	3	2613, 2614, 2615	13	No
PF3D7_0105700.1	2777	2791	3	2782, 2784, 2786	15	No
PF3D7_0105700.1	2803	2820	4	2808, 2810, 2813, 2815	18	No
PF3D7_0105700.1	2890	2900	3	2891, 2895, 2900	11	No
PF3D7_0105700.1	2929	2971	14	2933, 2934, 2939, 2940, 2946, 2947, 2948, 2949, 2956, 2957, 2959, 2964, 2965, 2966	43	No
PF3D7_0105700.1	3011	3026	4	3014, 3016, 3020, 3021	16	No
PF3D7_0105700.1	3049	3063	4	3054, 3055, 3057, 3060	15	No
PF3D7_0105800.1	1	15	4	3, 5, 10, 11	15	No
PF3D7_0105800.1	80	107	8	85, 86, 88, 91, 94, 97, 98, 102	28	No
PF3D7_0105800.1	108	142	9	109, 113, 117, 122, 127, 132, 135, 136, 137	35	No
PF3D7_0105800.1	207	234	9	209, 212, 216, 220, 223, 225, 226, 228, 229	28	No
PF3D7_0105800.1	239	260	7	241, 244, 249, 250, 252, 255, 258	22	No
PF3D7_0105800.1	278	290	3	283, 284, 285	13	No
PF3D7_0105800.1	303	323	7	308, 309, 312, 313, 315, 318, 323	21	No
PF3D7_0105800.1	339	352	3	344, 345, 347	14	No
PF3D7_0105800.1	417	432	3	422, 425, 427	16	No
PF3D7_0105800.1	479	494	3	484, 485, 489	16	No
PF3D7_0105800.1	502	516	3	507, 509, 511	15	No
PF3D7_0105800.1	689	703	3	694, 696, 698	15	No
PF3D7_0105800.1	775	792	4	780, 782, 783, 787	18	No
PF3D7_0106100.1	111	130	5	116, 119, 121, 123, 125	20	No
PF3D7_0106100.1	344	360	4	349, 353, 354, 355	17	No
PF3D7_0106300.1	180	195	5	182, 185, 188, 190, 194	16	No
PF3D7_0106300.1	243	258	3	248, 250, 253	16	No
PF3D7_0106300.1	374	390	4	379, 381, 383, 385	17	No
PF3D7_0106300.1	398	417	5	400, 403, 407, 411, 412	20	No
PF3D7_0106300.1	436	454	6	441, 442, 444, 446, 447, 449	19	No
PF3D7_0106300.1	461	474	3	466, 467, 469	14	No
PF3D7_0106300.1	481	494	4	482, 486, 489, 492	14	No
PF3D7_0106300.1	565	580	4	566, 570, 575, 576	16	No
PF3D7_0106300.1	587	607	6	591, 592, 597, 600, 601, 602	21	No
PF3D7_0106300.1	635	645	3	635, 640, 641	11	No
PF3D7_0106300.1	665	685	5	670, 672, 675, 679, 680	21	No
PF3D7_0106300.1	755	775	5	760, 762, 765, 769, 770	21	No
PF3D7_0106300.1	855	867	3	860, 861, 862	13	Yes
PF3D7_0106300.1	1116	1129	3	1121, 1122, 1124	14	No
PF3D7_0106400.1	134	156	9	139, 140, 141, 142, 144, 145, 147, 148, 152	23	No
PF3D7_0106700.1	280	290	3	280, 285, 286	11	No
PF3D7_0106700.1	315	325	3	318, 320, 325	11	No
PF3D7_0106700.1	487	501	3	492, 495, 496	15	No
PF3D7_0106700.1	550	565	3	555, 558, 560	16	No
PF3D7_0106700.1	599	612	3	604, 606, 607	14	No
PF3D7_0106700.1	617	627	3	617, 622, 625	11	No
PF3D7_0106700.1	954	985	9	954, 959, 961, 966, 968, 973, 975, 980, 982	32	No
PF3D7_0106700.1	1040	1054	3	1045, 1047, 1049	15	No
PF3D7_0106700.1	1121	1134	3	1126, 1127, 1129	14	No
PF3D7_0106700.1	1394	1408	3	1399, 1402, 1403	15	No
PF3D7_0107500.1	59	78	5	64, 67, 68, 70, 73	20	No
PF3D7_0107500.1	145	155	3	148, 150, 155	11	No
PF3D7_0107500.1	162	177	3	167, 171, 172	16	No
PF3D7_0107500.1	745	760	4	748, 750, 755, 756	16	No
PF3D7_0107500.1	852	867	3	857, 858, 862	16	No
PF3D7_0107500.1	872	887	3	877, 878, 882	16	No
PF3D7_0107500.1	914	931	6	919, 920, 922, 924, 925, 926	18	No
PF3D7_0107500.1	933	943	3	933, 938, 939	11	No
PF3D7_0107500.1	1009	1024	4	1014, 1015, 1019, 1022	16	No
PF3D7_0107500.1	1153	1168	4	1158, 1159, 1162, 1163	16	No
PF3D7_0107500.1	1413	1427	3	1418, 1421, 1422	15	No
PF3D7_0107800.1	1	11	3	3, 4, 6	11	No
PF3D7_0107800.1	21	31	3	25, 26, 31	11	No
PF3D7_0107800.1	33	48	4	38, 39, 43, 47	16	No
PF3D7_0107800.1	62	77	4	67, 69, 70, 72	16	No
PF3D7_0107800.1	187	202	4	191, 192, 197, 198	16	No
PF3D7_0107800.1	237	247	3	241, 242, 247	11	No
PF3D7_0107800.1	250	263	3	255, 257, 258	14	No
PF3D7_0107800.1	297	311	3	302, 303, 306	15	No
PF3D7_0107800.1	448	458	3	451, 453, 457	11	No
PF3D7_0107800.1	496	506	3	496, 501, 504	11	No
PF3D7_0107800.1	544	559	4	545, 549, 554, 556	16	No
PF3D7_0107800.1	976	993	4	981, 983, 986, 988	18	No
PF3D7_0107800.1	1183	1197	4	1188, 1189, 1192, 1197	15	No
PF3D7_0107800.1	1213	1223	3	1213, 1218, 1221	11	No
PF3D7_0108300.1	3	13	3	4, 8, 12	11	No
PF3D7_0108300.1	205	222	5	206, 210, 214, 215, 217	18	Yes
PF3D7_0108300.1	495	509	5	500, 501, 502, 503, 504	15	No
PF3D7_0108300.1	515	529	4	518, 520, 524, 527	15	No
PF3D7_0108300.1	529	547	5	534, 535, 538, 539, 542	19	No
PF3D7_0108300.1	631	643	4	636, 637, 638, 643	13	No
PF3D7_0108300.1	768	778	3	768, 773, 776	11	No
PF3D7_0108300.1	872	889	5	877, 879, 880, 884, 888	18	No
PF3D7_0108300.1	994	1013	5	995, 999, 1003, 1006, 1008	20	No
PF3D7_0108300.1	1089	1106	4	1094, 1096, 1098, 1101	18	No
PF3D7_0108300.1	1131	1146	3	1136, 1140, 1141	16	No
PF3D7_0108300.1	1161	1175	3	1166, 1167, 1170	15	No
PF3D7_0108300.1	1212	1226	4	1214, 1217, 1220, 1221	15	No
PF3D7_0108300.1	1231	1245	4	1236, 1238, 1240, 1245	15	No
PF3D7_0108300.1	1419	1432	5	1419, 1424, 1426, 1427, 1432	14	No
PF3D7_0108300.1	1648	1666	6	1653, 1654, 1655, 1656, 1661, 1665	19	No
PF3D7_0108300.1	1706	1727	6	1707, 1711, 1715, 1717, 1722, 1724	22	No
PF3D7_0108300.1	1829	1848	6	1834, 1838, 1839, 1841, 1842, 1843	20	No
PF3D7_0108300.1	1863	1875	3	1868, 1869, 1870	13	No
PF3D7_0108300.1	1878	1888	3	1878, 1883, 1888	11	No
PF3D7_0108300.1	1898	1915	5	1901, 1903, 1907, 1908, 1910	18	No
PF3D7_0108300.1	2009	2019	3	2010, 2014, 2019	11	No
PF3D7_0108300.1	2031	2057	7	2036, 2037, 2040, 2045, 2049, 2052, 2056	27	No
PF3D7_0108300.1	2082	2100	4	2087, 2091, 2092, 2095	19	No
PF3D7_0108300.1	2177	2187	3	2179, 2182, 2187	11	No
PF3D7_0108700.1	60	75	3	65, 67, 70	16	No
PF3D7_0108700.1	279	297	8	284, 285, 286, 287, 288, 289, 291, 292	19	No
PF3D7_0108700.1	376	386	3	376, 381, 382	11	No
PF3D7_0108700.1	436	448	4	437, 441, 443, 448	13	No
PF3D7_0108700.1	581	595	3	586, 588, 590	15	No
PF3D7_0108700.1	673	683	3	674, 678, 680	11	No
PF3D7_0108700.1	701	716	3	706, 707, 711	16	No
PF3D7_0108700.1	809	819	3	810, 814, 816	11	No
PF3D7_0108700.1	864	886	6	869, 872, 874, 879, 881, 885	23	No
PF3D7_0108700.1	978	993	4	983, 987, 988, 993	16	No
PF3D7_0108700.1	1000	1013	3	1005, 1007, 1008	14	No
PF3D7_0108700.1	1032	1042	3	1032, 1037, 1040	11	No
PF3D7_0108700.1	1054	1064	3	1055, 1059, 1062	11	No
PF3D7_0108700.1	1108	1121	4	1113, 1115, 1116, 1121	14	No
PF3D7_0108800.1	271	286	3	276, 277, 281	16	No
PF3D7_0108800.1	317	327	3	319, 322, 325	11	No
PF3D7_0109000.1	1	16	5	3, 4, 6, 10, 11	16	No
PF3D7_0109000.1	40	52	3	45, 46, 47	13	No
PF3D7_0109000.1	80	94	4	85, 86, 87, 89	15	No
PF3D7_0109000.1	148	163	4	149, 153, 158, 159	16	No
PF3D7_0109000.1	171	181	3	173, 176, 181	11	No
PF3D7_0109850.1	277	291	4	282, 283, 285, 286	15	No
PF3D7_0110400.1	125	142	5	127, 130, 133, 134, 137	18	No
PF3D7_0110500.1	42	57	3	47, 49, 52	16	No
PF3D7_0110500.1	81	96	3	86, 88, 91	16	No
PF3D7_0110500.1	199	209	3	200, 204, 206	11	No
PF3D7_0110500.1	419	447	9	419, 424, 425, 430, 431, 436, 437, 441, 442	29	No
PF3D7_0110500.1	463	478	4	467, 468, 473, 478	16	No
PF3D7_0110500.1	496	516	5	501, 505, 506, 509, 511	21	No
PF3D7_0110500.1	583	598	3	588, 592, 593	16	No
PF3D7_0110500.1	621	637	4	626, 628, 630, 632	17	No
PF3D7_0110500.1	675	688	3	680, 681, 683	14	No
PF3D7_0110500.1	689	699	3	690, 694, 698	11	No
PF3D7_0110500.1	853	863	3	854, 858, 860	11	No
PF3D7_0110500.1	900	910	3	900, 905, 906	11	No
PF3D7_0110500.1	939	956	4	944, 947, 948, 951	18	No
PF3D7_0110500.1	968	984	6	969, 973, 975, 976, 978, 979	17	No
PF3D7_0110500.1	1022	1032	3	1026, 1027, 1032	11	No
PF3D7_0110500.1	1038	1048	3	1041, 1043, 1047	11	No
PF3D7_0110500.1	1080	1096	5	1085, 1086, 1087, 1089, 1091	17	No
PF3D7_0110500.1	1134	1144	3	1136, 1139, 1144	11	No
PF3D7_0110500.1	1175	1185	3	1178, 1180, 1185	11	No
PF3D7_0110500.1	1237	1255	5	1242, 1244, 1246, 1250, 1254	19	No
PF3D7_0110500.1	1409	1425	4	1414, 1418, 1419, 1420	17	No
PF3D7_0110500.1	1482	1496	3	1487, 1490, 1491	15	No
PF3D7_0110500.1	1505	1515	3	1509, 1510, 1515	11	No
PF3D7_0110500.1	1559	1569	3	1559, 1564, 1565	11	No
PF3D7_0110500.1	1631	1646	4	1635, 1636, 1641, 1642	16	No
PF3D7_0110500.1	1800	1814	3	1805, 1806, 1809	15	Yes
PF3D7_0110500.1	1836	1852	5	1838, 1841, 1845, 1846, 1847	17	No
PF3D7_0110500.1	1887	1902	4	1892, 1893, 1897, 1901	16	No
PF3D7_0110600.1	316	331	3	321, 324, 326	16	No
PF3D7_0110600.1	399	426	8	404, 406, 408, 409, 411, 419, 420, 421	28	No
PF3D7_0110600.1	444	472	9	449, 453, 454, 456, 457, 458, 463, 467, 471	29	No
PF3D7_0110600.1	475	485	3	478, 480, 484	11	No
PF3D7_0110600.1	485	497	3	490, 491, 492	13	No
PF3D7_0110600.1	504	520	4	509, 510, 511, 515	17	No
PF3D7_0110600.1	693	708	5	698, 700, 701, 702, 703	16	No
PF3D7_0110600.1	760	778	6	765, 766, 768, 769, 771, 773	19	No
PF3D7_0110600.1	788	807	5	793, 794, 798, 799, 802	20	No
PF3D7_0110600.1	807	817	3	808, 812, 814	11	Yes
PF3D7_0110600.1	1205	1225	7	1206, 1210, 1215, 1217, 1218, 1220, 1225	21	No
PF3D7_0110600.1	1257	1281	8	1262, 1263, 1264, 1265, 1267, 1271, 1276, 1279	25	No
PF3D7_0110600.1	1444	1454	3	1445, 1449, 1451	11	No
PF3D7_0110600.1	1539	1549	3	1539, 1544, 1548	11	No
PF3D7_0110700.1	1	12	4	2, 3, 7, 12	12	No
PF3D7_0110700.1	122	132	3	125, 127, 131	11	No
PF3D7_0110700.1	142	152	3	144, 147, 152	11	No
PF3D7_0110700.1	307	317	3	307, 312, 314	11	No
PF3D7_0110700.1	347	361	4	347, 352, 356, 358	15	No
PF3D7_0110700.1	380	390	3	381, 385, 390	11	No
PF3D7_0110700.1	432	446	4	437, 440, 441, 443	15	No
PF3D7_0110800.1	1	30	9	2, 3, 5, 13, 14, 16, 21, 25, 28	30	No
PF3D7_0110800.1	40	54	3	45, 48, 49	15	No
PF3D7_0110800.1	120	130	3	120, 125, 126	11	No
PF3D7_0110800.1	245	258	3	250, 251, 253	14	No
PF3D7_0110800.1	269	284	3	274, 275, 279	16	No
PF3D7_0111000.1	29	55	6	34, 37, 38, 46, 49, 50	27	No
PF3D7_0111000.1	58	73	5	58, 63, 64, 65, 68	16	No
PF3D7_0111000.1	191	217	9	193, 196, 200, 202, 204, 206, 208, 210, 212	27	No
PF3D7_0111000.1	236	271	10	241, 244, 246, 247, 248, 252, 258, 261, 262, 266	36	No
PF3D7_0111000.1	361	393	10	363, 366, 369, 371, 376, 381, 382, 385, 387, 388	33	No
PF3D7_0111000.1	442	459	5	447, 448, 449, 454, 455	18	No
PF3D7_0111000.1	554	581	9	559, 560, 562, 566, 568, 571, 572, 575, 576	28	Yes
PF3D7_0111000.1	712	722	3	713, 717, 720	11	No
PF3D7_0111000.1	736	750	4	741, 744, 745, 750	15	No
PF3D7_0111000.1	779	798	5	779, 784, 788, 793, 798	20	No
PF3D7_0111000.1	824	842	5	825, 829, 833, 836, 837	19	No
PF3D7_0111000.1	886	899	3	891, 892, 894	14	No
PF3D7_0111000.1	975	985	3	975, 980, 984	11	No
PF3D7_0111000.1	986	1001	4	990, 991, 996, 999	16	No
PF3D7_0111000.1	1121	1140	6	1122, 1126, 1131, 1132, 1133, 1135	20	No
PF3D7_0111000.1	1168	1178	3	1169, 1173, 1175	11	No
PF3D7_0111000.1	1205	1215	3	1206, 1210, 1212	11	No
PF3D7_0111000.1	1238	1254	4	1243, 1245, 1248, 1249	17	No
PF3D7_0111400.1	6	44	11	11, 14, 15, 19, 23, 26, 29, 33, 36, 39, 42	39	Yes
PF3D7_0111400.1	45	55	3	49, 50, 55	11	No
PF3D7_0111400.1	59	73	4	64, 66, 67, 68	15	No
PF3D7_0111400.1	115	128	3	120, 121, 123	14	No
PF3D7_0111400.1	149	164	4	149, 154, 155, 159	16	No
PF3D7_0111400.1	198	224	7	199, 203, 207, 208, 214, 216, 219	27	No
PF3D7_0111400.1	239	254	3	244, 246, 249	16	No
PF3D7_0111400.1	335	350	4	340, 341, 345, 347	16	No
PF3D7_0111400.1	403	419	4	408, 411, 412, 414	17	No
PF3D7_0111400.1	442	452	3	443, 447, 449	11	No
PF3D7_0111400.1	484	496	3	489, 490, 491	13	No
PF3D7_0111400.1	540	550	3	542, 545, 550	11	No
PF3D7_0111600.1	78	92	3	83, 85, 87	15	No
PF3D7_0111800.1	77	87	3	77, 82, 83	11	No
PF3D7_0111800.1	123	133	3	123, 128, 131	11	No
PF3D7_0111800.1	194	208	4	199, 202, 203, 208	15	No
PF3D7_0111800.1	509	527	6	514, 516, 518, 520, 521, 522	19	No
PF3D7_0111800.1	567	601	12	568, 572, 575, 578, 582, 585, 587, 588, 589, 593, 595, 596	35	No
PF3D7_0112200.1	73	92	5	78, 81, 82, 86, 87	20	No
PF3D7_0112200.1	250	264	5	255, 256, 257, 258, 259	15	No
PF3D7_0112200.1	539	554	4	543, 544, 549, 550	16	No
PF3D7_0112200.1	606	625	7	611, 613, 614, 615, 617, 619, 620	20	No
PF3D7_0112200.1	630	646	5	635, 636, 638, 639, 641	17	No
PF3D7_0112200.1	873	888	4	878, 879, 883, 885	16	No
PF3D7_0112200.1	944	954	3	944, 949, 951	11	No
PF3D7_0112200.1	958	973	3	963, 967, 968	16	No
PF3D7_0112200.1	1002	1016	3	1007, 1009, 1011	15	No
PF3D7_0112200.1	1070	1101	11	1075, 1076, 1079, 1081, 1083, 1084, 1089, 1090, 1093, 1095, 1096	32	No
PF3D7_0112200.1	1114	1134	6	1119, 1120, 1121, 1127, 1128, 1129	21	No
PF3D7_0112200.1	1139	1151	3	1144, 1145, 1146	13	No
PF3D7_0112200.1	1518	1541	7	1523, 1525, 1526, 1530, 1531, 1536, 1540	24	No
PF3D7_0112200.1	1590	1605	4	1590, 1595, 1596, 1600	16	No
PF3D7_0112200.1	1782	1797	4	1787, 1788, 1790, 1792	16	Yes
PF3D7_0112900.1	17	27	3	17, 22, 26	11	No
PF3D7_0113000.1	36	51	3	41, 44, 46	16	No
PF3D7_0113000.1	58	72	3	63, 65, 67	15	No
PF3D7_0113000.1	76	88	3	81, 82, 83	13	No
PF3D7_0113000.1	92	105	4	97, 98, 99, 100	14	No
PF3D7_0113000.1	167	181	4	168, 172, 174, 176	15	No
PF3D7_0113000.1	206	221	4	211, 212, 214, 216	16	No
PF3D7_0113000.1	221	240	5	226, 227, 231, 232, 235	20	No
PF3D7_0113000.1	361	371	3	363, 366, 369	11	No
PF3D7_0113000.1	470	480	3	472, 475, 479	11	No
PF3D7_0113100.1	103	113	3	104, 108, 112	11	No
PF3D7_0113100.1	207	230	7	212, 213, 217, 223, 224, 225, 230	24	No
PF3D7_0113100.1	240	253	3	245, 246, 248	14	No
PF3D7_0113100.1	322	335	3	327, 329, 330	14	No
PF3D7_0113100.1	1143	1206	15	1148, 1151, 1153, 1160, 1163, 1165, 1172, 1175, 1177, 1184, 1187, 1189, 1196, 1199, 1201	64	No
PF3D7_0113100.1	1341	1355	3	1346, 1349, 1350	15	No
PF3D7_0113200.1	1	9	3	2, 4, 9	9	No
PF3D7_0113200.1	77	90	4	77, 82, 84, 85	14	Yes
PF3D7_0113200.1	97	111	6	98, 102, 104, 105, 106, 111	15	No
PF3D7_0113200.1	126	154	8	128, 131, 134, 138, 139, 144, 146, 149	29	No
PF3D7_0113200.1	183	196	3	188, 190, 191	14	No
PF3D7_0113200.1	205	220	4	210, 212, 215, 218	16	No
PF3D7_0113200.1	334	354	7	339, 341, 342, 343, 344, 349, 351	21	No
PF3D7_0113200.1	388	402	4	393, 396, 397, 402	15	No
PF3D7_0113200.1	425	456	9	429, 430, 435, 437, 440, 441, 447, 450, 451	32	No
PF3D7_0113200.1	464	479	3	469, 471, 474	16	No
PF3D7_0113200.1	493	505	3	498, 499, 500	13	No
PF3D7_0113700.1	129	143	3	134, 135, 138	15	No
PF3D7_0113700.1	152	167	3	157, 161, 162	16	No
PF3D7_0113700.1	208	224	4	213, 217, 218, 219	17	No
PF3D7_0113700.1	281	296	4	286, 287, 290, 291	16	No
PF3D7_0113700.1	359	374	3	364, 365, 369	16	No
PF3D7_0113900.1	50	67	6	55, 57, 58, 60, 61, 62	18	No
PF3D7_0113900.1	74	84	3	77, 79, 84	11	No
PF3D7_0113900.1	149	164	3	154, 155, 159	16	No
PF3D7_0113900.1	165	178	4	170, 171, 173, 177	14	No
PF3D7_0114000.1	4	16	3	9, 10, 11	13	No
PF3D7_0114000.1	79	91	3	84, 85, 86	13	No
PF3D7_0114000.1	101	116	4	106, 108, 111, 115	16	No
PF3D7_0114000.1	720	735	4	724, 725, 730, 731	16	No
PF3D7_0114000.1	945	955	3	945, 950, 951	11	No
PF3D7_0114000.1	1104	1116	3	1109, 1110, 1111	13	No
PF3D7_0114000.1	1154	1164	3	1156, 1159, 1164	11	No
PF3D7_0114100.1	72	86	3	77, 78, 81	15	No
PF3D7_0201700.1	37	55	6	42, 43, 45, 47, 50, 55	19	No
PF3D7_0201700.1	79	93	3	84, 86, 88	15	No
PF3D7_0201700.1	403	418	3	408, 410, 413	16	No
PF3D7_0201700.1	423	438	4	423, 428, 433, 438	16	No
PF3D7_0201700.1	443	455	3	448, 449, 450	13	No
PF3D7_0201700.1	460	475	3	465, 469, 470	16	No
PF3D7_0201700.1	505	515	3	508, 510, 514	11	No
PF3D7_0201700.1	764	781	5	769, 770, 771, 775, 776	18	No
PF3D7_0201900.1	64	78	3	69, 72, 73	15	No
PF3D7_0201900.1	132	150	6	133, 137, 140, 141, 142, 145	19	No
PF3D7_0201900.1	343	358	4	344, 348, 353, 354	16	No
PF3D7_0201900.1	449	459	3	451, 454, 457	11	No
PF3D7_0201900.1	650	665	4	655, 656, 660, 663	16	No
PF3D7_0201900.1	677	687	3	678, 682, 685	11	No
PF3D7_0201900.1	699	709	3	700, 704, 707	11	No
PF3D7_0201900.1	743	753	3	744, 748, 751	11	No
PF3D7_0201900.1	765	775	3	766, 770, 773	11	No
PF3D7_0201900.1	1327	1337	3	1327, 1332, 1334	11	No
PF3D7_0201900.1	1353	1363	3	1353, 1358, 1360	11	No
PF3D7_0201900.1	1366	1376	3	1366, 1371, 1373	11	No
PF3D7_0201900.1	1392	1402	3	1392, 1397, 1399	11	No
PF3D7_0201900.1	1418	1428	3	1418, 1423, 1425	11	No
PF3D7_0201900.1	1457	1467	3	1457, 1462, 1464	11	No
PF3D7_0201900.1	1496	1506	3	1496, 1501, 1503	11	No
PF3D7_0201900.1	1522	1532	3	1522, 1527, 1529	11	No
PF3D7_0201900.1	1548	1558	3	1548, 1553, 1555	11	No
PF3D7_0201900.1	1561	1571	3	1561, 1566, 1568	11	No
PF3D7_0201900.1	1587	1597	3	1587, 1592, 1594	11	No
PF3D7_0201900.1	1613	1623	3	1613, 1618, 1620	11	No
PF3D7_0201900.1	1626	1636	3	1626, 1631, 1633	11	No
PF3D7_0201900.1	1639	1649	3	1639, 1644, 1646	11	No
PF3D7_0201900.1	1665	1675	3	1665, 1670, 1672	11	No
PF3D7_0201900.1	1678	1688	3	1678, 1683, 1685	11	No
PF3D7_0201900.1	1691	1701	3	1691, 1696, 1698	11	No
PF3D7_0201900.1	1717	1727	3	1717, 1722, 1724	11	No
PF3D7_0201900.1	1769	1779	3	1769, 1774, 1776	11	No
PF3D7_0201900.1	1782	1792	3	1782, 1787, 1789	11	No
PF3D7_0201900.1	1795	1805	3	1795, 1800, 1802	11	No
PF3D7_0201900.1	1847	1857	3	1847, 1852, 1854	11	No
PF3D7_0201900.1	1860	1870	3	1860, 1865, 1867	11	No
PF3D7_0201900.1	1873	1883	3	1873, 1878, 1880	11	No
PF3D7_0201900.1	1899	1909	3	1899, 1904, 1906	11	No
PF3D7_0201900.1	1925	1935	3	1925, 1930, 1932	11	No
PF3D7_0201900.1	1938	1948	3	1938, 1943, 1945	11	No
PF3D7_0201900.1	1964	1974	3	1964, 1969, 1971	11	No
PF3D7_0201900.1	1977	1987	3	1977, 1982, 1984	11	No
PF3D7_0201900.1	2003	2013	3	2003, 2008, 2010	11	No
PF3D7_0201900.1	2042	2052	3	2042, 2047, 2049	11	No
PF3D7_0201900.1	2055	2065	3	2055, 2060, 2062	11	No
PF3D7_0201900.1	2068	2078	3	2068, 2073, 2075	11	No
PF3D7_0201900.1	2120	2130	3	2120, 2125, 2127	11	No
PF3D7_0201900.1	2133	2143	3	2133, 2138, 2140	11	No
PF3D7_0201900.1	2146	2156	3	2146, 2151, 2153	11	No
PF3D7_0201900.1	2159	2169	3	2159, 2164, 2166	11	No
PF3D7_0201900.1	2185	2195	3	2185, 2190, 2192	11	No
PF3D7_0201900.1	2211	2221	3	2211, 2216, 2218	11	No
PF3D7_0201900.1	2224	2234	3	2224, 2229, 2231	11	No
PF3D7_0201900.1	2250	2260	3	2250, 2255, 2257	11	No
PF3D7_0201900.1	2263	2273	3	2263, 2268, 2270	11	No
PF3D7_0201900.1	2289	2299	3	2289, 2294, 2296	11	No
PF3D7_0201900.1	2315	2325	3	2315, 2320, 2322	11	No
PF3D7_0201900.1	2341	2351	3	2341, 2346, 2348	11	No
PF3D7_0201900.1	2417	2432	4	2422, 2426, 2427, 2432	16	No
PF3D7_0202000.1	153	168	4	154, 158, 160, 163	16	No
PF3D7_0202000.1	180	204	7	180, 185, 188, 193, 194, 198, 199	25	No
PF3D7_0202000.1	267	282	4	272, 274, 277, 282	16	No
PF3D7_0202000.1	289	304	4	294, 297, 299, 303	16	No
PF3D7_0202000.1	322	336	3	327, 328, 331	15	No
PF3D7_0202000.1	336	357	7	341, 343, 344, 345, 347, 348, 352	22	No
PF3D7_0202000.1	401	411	3	403, 406, 411	11	No
PF3D7_0202000.1	428	438	3	430, 433, 436	11	No
PF3D7_0202000.1	459	477	4	464, 467, 469, 472	19	No
PF3D7_0202000.1	489	511	6	494, 495, 496, 501, 502, 506	23	No
PF3D7_0202000.1	513	530	5	513, 518, 521, 524, 525	18	No
PF3D7_0202000.1	539	613	29	540, 544, 548, 549, 550, 554, 558, 559, 560, 564, 568, 569, 570, 574, 578, 579, 580, 584, 588, 589, 590, 594, 598, 599, 600, 603, 604, 605, 608	75	No
PF3D7_0202100.1	66	84	6	68, 71, 74, 76, 79, 83	19	No
PF3D7_0202100.1	89	106	5	90, 94, 96, 101, 103	18	No
PF3D7_0202100.1	140	153	3	145, 146, 148	14	No
PF3D7_0202400.1	39	69	8	44, 45, 46, 55, 56, 59, 62, 64	31	No
PF3D7_0202400.1	77	92	4	77, 82, 87, 88	16	No
PF3D7_0202400.1	194	208	4	199, 201, 202, 203	15	No
PF3D7_0202400.1	221	240	5	224, 226, 230, 234, 235	20	No
PF3D7_0202400.1	272	286	4	272, 277, 281, 283	15	No
PF3D7_0202400.1	325	338	3	330, 332, 333	14	No
PF3D7_0202400.1	401	417	4	406, 407, 411, 412	17	No
PF3D7_0202400.1	481	491	3	483, 486, 490	11	No
PF3D7_0202400.1	531	545	4	534, 536, 540, 543	15	No
PF3D7_0202400.1	581	595	4	584, 586, 590, 593	15	No
PF3D7_0202400.1	752	762	3	754, 757, 760	11	No
PF3D7_0202400.1	894	908	3	899, 902, 903	15	No
PF3D7_0202400.1	1002	1015	3	1007, 1008, 1010	14	No
PF3D7_0202500.1	93	106	5	98, 100, 101, 102, 104	14	No
PF3D7_0202600.1	4	17	3	9, 11, 12	14	No
PF3D7_0202600.1	95	110	4	99, 100, 105, 106	16	No
PF3D7_0202600.1	360	375	4	364, 365, 370, 372	16	No
PF3D7_0202600.1	533	543	3	534, 538, 542	11	No
PF3D7_0202600.1	697	709	3	702, 703, 704	13	No
PF3D7_0202600.1	879	889	3	883, 884, 889	11	No
PF3D7_0202600.1	891	912	6	895, 896, 901, 902, 907, 908	22	No
PF3D7_0202600.1	914	924	3	914, 919, 920	11	No
PF3D7_0202600.1	971	986	4	974, 976, 981, 986	16	No
PF3D7_0202600.1	996	1010	3	1001, 1002, 1005	15	No
PF3D7_0202600.1	1053	1070	4	1058, 1060, 1062, 1065	18	No
PF3D7_0202600.1	1072	1085	4	1077, 1079, 1080, 1085	14	No
PF3D7_0202600.1	1114	1129	3	1119, 1121, 1124	16	Yes
PF3D7_0203000.1	10	25	4	15, 16, 20, 23	16	No
PF3D7_0203000.1	33	47	3	38, 40, 42	15	No
PF3D7_0203000.1	47	61	5	48, 52, 54, 56, 61	15	No
PF3D7_0203000.1	132	150	5	137, 140, 142, 143, 145	19	No
PF3D7_0203000.1	511	521	3	514, 516, 520	11	No
PF3D7_0203000.1	576	590	4	578, 581, 584, 585	15	No
PF3D7_0203000.1	604	614	3	606, 609, 612	11	No
PF3D7_0203000.1	1418	1432	3	1423, 1426, 1427	15	No
PF3D7_0203000.1	1460	1481	7	1465, 1466, 1468, 1469, 1472, 1476, 1479	22	No
PF3D7_0203000.1	1710	1720	3	1712, 1715, 1719	11	No
PF3D7_0203000.1	1750	1760	3	1751, 1755, 1758	11	No
PF3D7_0203000.1	1845	1860	4	1847, 1850, 1855, 1857	16	No
PF3D7_0203000.1	1924	1947	8	1926, 1929, 1934, 1935, 1936, 1937, 1942, 1945	24	No
PF3D7_0203100.1	174	189	4	178, 179, 184, 185	16	No
PF3D7_0203100.1	320	346	9	323, 325, 330, 332, 333, 334, 338, 340, 341	27	No
PF3D7_0203100.1	437	460	7	438, 442, 447, 448, 450, 455, 456	24	No
PF3D7_0203100.1	564	574	3	564, 569, 571	11	No
PF3D7_0203100.1	578	593	6	583, 584, 585, 586, 587, 588	16	No
PF3D7_0203100.1	648	672	8	653, 654, 658, 659, 663, 664, 666, 667	25	No
PF3D7_0203100.1	688	703	4	693, 694, 695, 698	16	No
PF3D7_0203100.1	792	806	3	797, 799, 801	15	No
PF3D7_0203100.1	819	842	7	819, 824, 827, 831, 832, 836, 837	24	No
PF3D7_0203100.1	864	878	3	869, 872, 873	15	No
PF3D7_0203100.1	1154	1164	3	1155, 1159, 1161	11	No
PF3D7_0203100.1	1366	1381	3	1371, 1374, 1376	16	No
PF3D7_0203100.1	1424	1446	6	1429, 1430, 1431, 1437, 1439, 1441	23	No
PF3D7_0203100.1	1503	1522	5	1505, 1508, 1513, 1517, 1522	20	No
PF3D7_0203100.1	1537	1555	5	1539, 1542, 1545, 1550, 1551	19	No
PF3D7_0203100.1	1571	1590	6	1576, 1579, 1580, 1583, 1585, 1590	20	No
PF3D7_0203100.1	1597	1607	3	1598, 1602, 1607	11	No
PF3D7_0203100.1	1787	1801	4	1792, 1794, 1795, 1796	15	No
PF3D7_0203100.1	1950	1971	6	1953, 1955, 1959, 1961, 1966, 1968	22	No
PF3D7_0203100.1	2103	2118	4	2103, 2108, 2113, 2114	16	No
PF3D7_0203100.1	2270	2285	3	2275, 2276, 2280	16	No
PF3D7_0203100.1	2299	2309	3	2300, 2304, 2307	11	No
PF3D7_0203100.1	2358	2371	3	2363, 2364, 2366	14	No
PF3D7_0203100.1	2403	2416	3	2408, 2409, 2411	14	No
PF3D7_0203100.1	2434	2449	3	2439, 2441, 2444	16	No
PF3D7_0203100.1	2452	2465	4	2457, 2458, 2459, 2460	14	No
PF3D7_0203100.1	2475	2485	3	2476, 2480, 2483	11	No
PF3D7_0203400.1	8	42	11	13, 14, 15, 18, 25, 26, 28, 32, 35, 37, 41	35	No
PF3D7_0203400.1	42	55	4	47, 49, 50, 55	14	No
PF3D7_0203600.1	65	75	3	68, 70, 74	11	No
PF3D7_0203600.1	157	177	6	158, 162, 166, 167, 170, 172	21	No
PF3D7_0203600.1	213	257	13	218, 221, 223, 229, 230, 232, 234, 240, 241, 242, 249, 251, 252	45	No
PF3D7_0203600.1	274	300	11	279, 280, 283, 284, 285, 286, 287, 289, 290, 291, 295	27	No
PF3D7_0203600.1	316	337	6	321, 322, 323, 327, 330, 332	22	No
PF3D7_0204100.1	16	31	3	21, 24, 26	16	Yes
PF3D7_0204100.1	39	54	4	43, 44, 49, 50	16	No
PF3D7_0204100.1	58	70	3	63, 64, 65	13	No
PF3D7_0204100.1	82	99	5	83, 87, 89, 94, 99	18	No
PF3D7_0204100.1	123	135	3	128, 129, 130	13	No
PF3D7_0204100.1	221	236	3	226, 229, 231	16	No
PF3D7_0204100.1	486	500	3	491, 493, 495	15	No
PF3D7_0204100.1	512	542	7	514, 517, 522, 527, 532, 537, 542	31	No
PF3D7_0204100.1	561	575	3	566, 567, 570	15	No
PF3D7_0204100.1	746	756	3	746, 751, 754	11	No
PF3D7_0204100.1	1039	1058	6	1044, 1048, 1049, 1050, 1053, 1056	20	No
PF3D7_0204100.1	1125	1145	7	1130, 1131, 1132, 1135, 1136, 1138, 1140	21	No
PF3D7_0204100.1	1239	1249	3	1239, 1244, 1248	11	No
PF3D7_0204100.1	1305	1315	3	1306, 1310, 1314	11	No
PF3D7_0204100.1	1327	1342	4	1332, 1335, 1336, 1337	16	No
PF3D7_0204100.1	1346	1364	6	1351, 1353, 1354, 1355, 1358, 1359	19	No
PF3D7_0204100.1	1365	1375	3	1368, 1370, 1374	11	No
PF3D7_0204100.1	1487	1501	3	1492, 1493, 1496	15	No
PF3D7_0204100.1	1512	1525	3	1517, 1518, 1520	14	No
PF3D7_0204100.1	1586	1596	3	1589, 1591, 1595	11	No
PF3D7_0204100.1	1610	1620	3	1611, 1615, 1620	11	No
PF3D7_0204100.1	1719	1748	10	1724, 1725, 1726, 1728, 1734, 1735, 1737, 1740, 1743, 1746	30	No
PF3D7_0204100.1	1771	1785	4	1771, 1776, 1779, 1780	15	No
PF3D7_0204100.1	1904	1919	5	1909, 1911, 1912, 1913, 1914	16	No
PF3D7_0204100.1	1926	1936	3	1926, 1931, 1932	11	No
PF3D7_0204200.1	209	219	3	211, 214, 217	11	No
PF3D7_0204300.1	122	134	3	127, 128, 129	13	No
PF3D7_0204300.1	155	185	8	160, 161, 163, 167, 172, 176, 178, 180	31	No
PF3D7_0204300.1	195	212	4	200, 204, 205, 207	18	No
PF3D7_0204300.1	228	243	4	232, 233, 238, 239	16	No
PF3D7_0204300.1	285	305	5	289, 290, 295, 300, 302	21	No
PF3D7_0204300.1	475	485	3	477, 480, 485	11	No
PF3D7_0204300.1	633	643	3	635, 638, 642	11	No
PF3D7_0204700.1	1	15	5	2, 4, 5, 9, 10	15	Yes
PF3D7_0204700.1	274	289	4	274, 279, 281, 284	16	No
PF3D7_0205900.1	112	126	4	113, 117, 120, 121	15	No
PF3D7_0205900.1	325	339	5	330, 331, 333, 334, 339	15	No
PF3D7_0205900.1	366	381	3	371, 372, 376	16	No
PF3D7_0205900.1	633	675	14	638, 642, 643, 644, 648, 653, 654, 661, 662, 663, 664, 666, 667, 670	43	No
PF3D7_0205900.1	681	702	7	684, 686, 691, 692, 693, 694, 697	22	No
PF3D7_0205900.1	712	731	5	717, 721, 722, 725, 726	20	No
PF3D7_0205900.1	912	934	6	915, 917, 921, 924, 929, 931	23	No
PF3D7_0206000.1	164	190	8	167, 169, 173, 175, 179, 181, 185, 187	27	No
PF3D7_0206000.1	191	204	4	196, 198, 199, 204	14	No
PF3D7_0206000.1	280	295	3	285, 286, 290	16	No
PF3D7_0206000.1	460	475	5	465, 466, 467, 468, 470	16	No
PF3D7_0206000.1	874	884	3	877, 879, 884	11	No
PF3D7_0206000.1	899	911	3	904, 905, 906	13	No
PF3D7_0206000.1	930	945	6	935, 936, 937, 938, 939, 940	16	No
PF3D7_0206000.1	973	996	7	978, 980, 982, 983, 988, 991, 996	24	No
PF3D7_0206000.1	1047	1062	3	1052, 1055, 1057	16	No
PF3D7_0206000.1	1083	1099	4	1088, 1089, 1091, 1094	17	No
PF3D7_0206000.1	1099	1116	5	1100, 1104, 1109, 1111, 1116	18	No
PF3D7_0206000.1	1475	1485	3	1475, 1480, 1483	11	No
PF3D7_0206000.1	1491	1506	3	1496, 1500, 1501	16	No
PF3D7_0206500.1	54	83	13	57, 59, 63, 64, 66, 68, 69, 70, 71, 75, 76, 77, 78	30	No
PF3D7_0206500.1	265	282	6	265, 270, 273, 274, 275, 277	18	No
PF3D7_0206500.1	317	332	5	322, 323, 325, 326, 327	16	No
PF3D7_0206500.1	362	378	5	367, 369, 371, 373, 377	17	No
PF3D7_0206500.1	397	422	8	402, 403, 404, 406, 410, 413, 417, 420	26	No
PF3D7_0206500.1	427	443	5	427, 432, 433, 436, 438	17	No
PF3D7_0206500.1	459	472	4	464, 465, 466, 467	14	No
PF3D7_0206500.1	648	673	10	648, 653, 654, 655, 656, 657, 665, 666, 667, 668	26	No
PF3D7_0206500.1	778	792	3	783, 786, 787	15	No
PF3D7_0206500.1	798	824	7	803, 804, 807, 810, 814, 819, 822	27	No
PF3D7_0206500.1	835	849	4	840, 841, 843, 844	15	No
PF3D7_0206500.1	1339	1351	3	1344, 1345, 1346	13	Yes
PF3D7_0207100.1	135	145	3	136, 140, 142	11	No
PF3D7_0207100.1	200	211	4	200, 205, 206, 211	12	No
PF3D7_0207100.1	224	239	5	229, 231, 232, 233, 234	16	No
PF3D7_0207100.1	258	268	3	261, 263, 268	11	No
PF3D7_0207100.1	354	370	5	359, 360, 363, 364, 365	17	No
PF3D7_0207100.1	401	425	6	406, 408, 409, 416, 418, 420	25	No
PF3D7_0207100.1	427	440	3	432, 433, 435	14	No
PF3D7_0207100.1	526	536	3	526, 531, 532	11	No
PF3D7_0207100.1	605	615	3	608, 610, 614	11	No
PF3D7_0207100.1	670	685	5	675, 677, 678, 679, 680	16	Yes
PF3D7_0207100.1	703	717	3	708, 709, 712	15	No
PF3D7_0207100.1	741	756	4	745, 746, 751, 752	16	No
PF3D7_0207100.1	798	815	5	799, 803, 807, 808, 810	18	No
PF3D7_0207100.1	824	843	5	829, 830, 833, 834, 838	20	Yes
PF3D7_0207100.1	893	910	5	898, 902, 903, 904, 905	18	No
PF3D7_0207100.1	1653	1669	7	1658, 1659, 1660, 1661, 1662, 1664, 1669	17	No
PF3D7_0207100.1	1671	1686	4	1676, 1677, 1679, 1681	16	No
PF3D7_0207100.1	1691	1706	4	1691, 1696, 1700, 1701	16	No
PF3D7_0207100.1	1706	1721	5	1708, 1711, 1714, 1716, 1720	16	No
PF3D7_0207600.1	17	36	5	22, 23, 26, 28, 31	20	Yes
PF3D7_0207600.1	41	113	29	46, 47, 50, 54, 55, 58, 62, 63, 66, 70, 71, 74, 78, 79, 82, 86, 87, 90, 92, 93, 95, 97, 99, 100, 101, 102, 103, 108, 113	73	No
PF3D7_0207600.1	160	177	4	165, 168, 170, 172	18	No
PF3D7_0207600.1	178	240	38	178, 183, 186, 187, 192, 193, 194, 196, 201, 205, 207, 208, 209, 210, 211, 212, 213, 214, 215, 216, 217, 218, 219, 220, 221, 222, 223, 224, 225, 226, 227, 228, 229, 230, 231, 232, 233, 235	63	No
PF3D7_0207600.1	368	382	4	373, 375, 377, 382	15	No
PF3D7_0207600.1	448	461	4	453, 454, 456, 460	14	No
PF3D7_0207600.1	551	564	3	556, 558, 559	14	No
PF3D7_0207600.1	698	713	4	703, 704, 706, 708	16	No
PF3D7_0207600.1	830	850	6	835, 838, 840, 841, 845, 849	21	No
PF3D7_0207600.1	886	917	9	888, 891, 894, 898, 900, 904, 907, 908, 912	32	No
PF3D7_0207600.1	942	957	4	947, 949, 951, 952	16	No
PF3D7_0208100.1	16	26	3	17, 21, 25	11	No
PF3D7_0208100.1	422	437	3	427, 430, 432	16	No
PF3D7_0208100.1	615	627	3	620, 621, 622	13	No
PF3D7_0208100.1	628	638	3	629, 633, 636	11	No
PF3D7_0208100.1	897	910	3	902, 904, 905	14	No
PF3D7_0208100.1	984	1005	7	989, 990, 991, 995, 996, 999, 1000	22	No
PF3D7_0208100.1	1157	1170	4	1162, 1163, 1165, 1169	14	No
PF3D7_0208100.1	1231	1257	6	1236, 1239, 1240, 1247, 1251, 1252	27	No
PF3D7_0208100.1	1265	1280	3	1270, 1274, 1275	16	No
PF3D7_0208100.1	1361	1377	4	1366, 1368, 1371, 1372	17	No
PF3D7_0208100.1	1509	1539	8	1514, 1516, 1519, 1523, 1525, 1529, 1530, 1534	31	No
PF3D7_0208200.1	55	65	3	56, 60, 65	11	No
PF3D7_0208200.1	105	120	3	110, 113, 115	16	No
PF3D7_0208400.1	222	234	3	227, 228, 229	13	No
PF3D7_0208400.1	523	535	3	528, 529, 530	13	No
PF3D7_0208400.1	687	701	3	692, 694, 696	15	No
PF3D7_0208400.1	705	715	3	706, 710, 713	11	No
PF3D7_0208400.1	1047	1060	3	1052, 1053, 1055	14	No
PF3D7_0208400.1	1141	1156	4	1142, 1146, 1151, 1152	16	No
PF3D7_0208400.1	1190	1210	5	1190, 1195, 1200, 1203, 1205	21	No
PF3D7_0208400.1	1241	1251	3	1241, 1246, 1249	11	No
PF3D7_0208400.1	1388	1398	3	1390, 1393, 1396	11	No
PF3D7_0208400.1	1456	1469	3	1461, 1462, 1464	14	No
PF3D7_0208400.1	1759	1772	3	1764, 1765, 1767	14	No
PF3D7_0208400.1	1862	1877	4	1867, 1868, 1871, 1872	16	No
PF3D7_0208400.1	1949	1969	5	1954, 1957, 1959, 1963, 1964	21	No
PF3D7_0209100.1	30	45	4	35, 36, 38, 40	16	No
PF3D7_0209100.1	157	182	10	157, 162, 163, 164, 165, 168, 170, 174, 177, 182	26	No
PF3D7_0209100.1	184	199	4	189, 190, 192, 194	16	No
PF3D7_0209100.1	402	412	3	402, 407, 408	11	No
PF3D7_0209100.1	501	512	4	501, 506, 507, 512	12	No
PF3D7_0209100.1	571	595	8	576, 579, 581, 584, 585, 587, 589, 590	25	No
PF3D7_0209600.1	2	22	7	2, 7, 8, 10, 12, 13, 17	21	No
PF3D7_0209600.1	44	62	5	49, 53, 54, 55, 57	19	No
PF3D7_0209600.1	71	87	5	72, 76, 78, 81, 82	17	No
PF3D7_0209600.1	101	117	5	101, 106, 110, 111, 112	17	No
PF3D7_0209600.1	128	143	4	130, 133, 138, 141	16	No
PF3D7_0209600.1	202	215	3	207, 209, 210	14	No
PF3D7_0209600.1	366	383	4	371, 373, 375, 378	18	No
PF3D7_0209800.1	43	59	4	48, 49, 51, 54	17	No
PF3D7_0209800.1	394	407	3	399, 401, 402	14	No
PF3D7_0210200.1	71	81	3	71, 76, 81	11	No
PF3D7_0210200.1	128	143	4	130, 133, 138, 140	16	Yes
PF3D7_0210200.1	247	261	3	252, 253, 256	15	No
PF3D7_0210200.1	440	462	7	445, 446, 450, 451, 452, 456, 457	23	No
PF3D7_0210200.1	519	553	10	520, 524, 527, 531, 534, 538, 541, 545, 548, 552	35	No
PF3D7_0210200.1	578	592	4	580, 583, 587, 590	15	No
PF3D7_0210200.1	598	615	4	603, 606, 608, 610	18	No
PF3D7_0210200.1	761	775	3	766, 769, 770	15	No
PF3D7_0210200.1	1125	1143	5	1126, 1130, 1134, 1138, 1142	19	No
PF3D7_0210200.1	1221	1234	3	1226, 1228, 1229	14	No
PF3D7_0210200.1	1311	1321	3	1312, 1316, 1320	11	No
PF3D7_0210200.1	1588	1651	30	1589, 1593, 1595, 1600, 1601, 1604, 1605, 1606, 1607, 1609, 1610, 1611, 1612, 1613, 1614, 1616, 1617, 1618, 1619, 1620, 1622, 1625, 1626, 1628, 1633, 1637, 1640, 1644, 1645, 1646	64	No
PF3D7_0210200.1	1840	1865	6	1845, 1846, 1848, 1857, 1859, 1860	26	No
PF3D7_0210200.1	1871	1889	5	1876, 1877, 1880, 1883, 1884	19	No
PF3D7_0210200.1	1915	1930	3	1920, 1922, 1925	16	No
PF3D7_0210200.1	2116	2126	3	2119, 2121, 2125	11	No
PF3D7_0210200.1	2384	2399	5	2385, 2389, 2392, 2393, 2394	16	No
PF3D7_0210200.1	2517	2532	4	2522, 2523, 2526, 2527	16	No
PF3D7_0210300.1	1	18	5	6, 7, 10, 11, 13	18	No
PF3D7_0210300.1	251	271	6	256, 258, 261, 263, 265, 266	21	No
PF3D7_0210300.1	312	328	5	312, 317, 319, 323, 326	17	No
PF3D7_0210300.1	441	455	3	446, 447, 450	15	No
PF3D7_0210600.1	386	405	6	391, 393, 395, 397, 400, 405	20	No
PF3D7_0210900.1	6	19	3	11, 13, 14	14	Yes
PF3D7_0210900.1	25	64	14	26, 30, 34, 35, 36, 37, 40, 42, 45, 46, 49, 54, 59, 60	40	No
PF3D7_0210900.1	104	119	3	109, 111, 114	16	No
PF3D7_0210900.1	130	145	6	130, 135, 136, 139, 140, 145	16	No
PF3D7_0210900.1	153	179	7	158, 159, 161, 164, 170, 172, 174	27	No
PF3D7_0210900.1	183	215	8	186, 188, 193, 198, 201, 206, 209, 210	33	No
PF3D7_0210900.1	219	241	7	224, 227, 229, 232, 233, 234, 236	23	No
PF3D7_0210900.1	275	284	3	275, 280, 281	10	No
PF3D7_0211200.1	1	26	8	5, 6, 7, 9, 15, 16, 20, 21	26	No
PF3D7_0211200.1	121	135	3	126, 128, 130	15	No
PF3D7_0211200.1	225	235	4	228, 230, 234, 235	11	Yes
PF3D7_0211700.1	152	164	3	157, 158, 159	13	No
PF3D7_0211700.1	170	186	4	175, 177, 180, 181	17	No
PF3D7_0211700.1	338	353	3	343, 346, 348	16	No
PF3D7_0211700.1	363	404	11	368, 369, 372, 373, 378, 382, 385, 386, 395, 398, 399	42	No
PF3D7_0211700.1	406	421	4	408, 411, 416, 420	16	No
PF3D7_0211700.1	427	452	7	428, 432, 435, 440, 444, 445, 447	26	No
PF3D7_0211700.1	454	469	4	455, 459, 464, 466	16	No
PF3D7_0211700.1	612	632	5	613, 617, 622, 627, 632	21	No
PF3D7_0211700.1	647	667	5	647, 652, 657, 662, 667	21	No
PF3D7_0211700.1	695	723	9	700, 702, 704, 709, 710, 715, 716, 718, 722	29	No
PF3D7_0211700.1	778	793	3	783, 784, 788	16	No
PF3D7_0211700.1	923	942	5	926, 928, 932, 934, 937	20	No
PF3D7_0211800.1	211	238	7	216, 217, 220, 221, 228, 230, 233	28	No
PF3D7_0211800.1	317	338	7	322, 323, 324, 325, 329, 330, 333	22	No
PF3D7_0211800.1	350	360	3	353, 355, 359	11	No
PF3D7_0211800.1	377	390	3	382, 384, 385	14	No
PF3D7_0212100.1	9	29	5	13, 14, 19, 24, 28	21	No
PF3D7_0212100.1	149	159	3	150, 154, 156	11	No
PF3D7_0212100.1	237	257	6	240, 242, 247, 249, 250, 252	21	No
PF3D7_0212100.1	360	375	5	360, 365, 366, 368, 370	16	No
PF3D7_0212100.1	464	474	3	467, 469, 473	11	No
PF3D7_0212100.1	516	526	3	516, 521, 522	11	No
PF3D7_0212100.1	629	645	4	634, 635, 639, 640	17	No
PF3D7_0212100.1	759	774	3	764, 768, 769	16	No
PF3D7_0212100.1	795	810	6	796, 800, 802, 803, 804, 805	16	No
PF3D7_0212100.1	1150	1166	5	1150, 1155, 1158, 1160, 1161	17	No
PF3D7_0212100.1	1173	1190	5	1178, 1182, 1183, 1185, 1189	18	No
PF3D7_0212100.1	1208	1234	8	1213, 1217, 1218, 1219, 1220, 1227, 1228, 1229	27	No
PF3D7_0212100.1	1235	1245	3	1235, 1240, 1245	11	No
PF3D7_0212100.1	1418	1432	3	1423, 1425, 1427	15	No
PF3D7_0212100.1	1465	1480	4	1467, 1470, 1473, 1475	16	No
PF3D7_0212100.1	1596	1606	3	1599, 1601, 1606	11	No
PF3D7_0212100.1	1730	1745	3	1735, 1738, 1740	16	No
PF3D7_0212100.1	1747	1757	3	1747, 1752, 1757	11	No
PF3D7_0212100.1	1771	1790	7	1771, 1776, 1778, 1779, 1781, 1782, 1785	20	No
PF3D7_0212100.1	1794	1807	3	1799, 1801, 1802	14	No
PF3D7_0212100.1	1812	1822	3	1813, 1817, 1822	11	No
PF3D7_0212100.1	1826	1840	3	1831, 1832, 1835	15	No
PF3D7_0212300.1	51	61	3	54, 56, 60	11	No
PF3D7_0212300.1	64	79	5	66, 69, 72, 73, 74	16	No
PF3D7_0212400.1	105	115	3	105, 110, 114	11	No
PF3D7_0212400.1	286	300	4	286, 291, 293, 295	15	No
PF3D7_0212400.1	364	379	3	369, 371, 374	16	No
PF3D7_0212400.1	1027	1040	3	1032, 1033, 1035	14	No
PF3D7_0212400.1	1048	1063	4	1049, 1053, 1055, 1058	16	No
PF3D7_0212400.1	1088	1103	4	1089, 1093, 1097, 1098	16	No
PF3D7_0212400.1	1150	1162	3	1155, 1156, 1157	13	No
PF3D7_0212400.1	1165	1206	13	1165, 1170, 1173, 1174, 1180, 1182, 1185, 1186, 1188, 1190, 1196, 1197, 1201	42	No
PF3D7_0212400.1	1210	1243	13	1215, 1216, 1219, 1220, 1223, 1224, 1227, 1228, 1231, 1232, 1233, 1238, 1239	34	No
PF3D7_0212400.1	1611	1626	4	1616, 1617, 1620, 1621	16	No
PF3D7_0212400.1	2023	2033	3	2023, 2028, 2030	11	No
PF3D7_0212400.1	2497	2507	3	2497, 2502, 2503	11	No
PF3D7_0212400.1	2659	2672	4	2659, 2664, 2665, 2667	14	No
PF3D7_0212400.1	3452	3466	3	3457, 3458, 3461	15	No
PF3D7_0212400.1	3483	3493	3	3483, 3488, 3492	11	No
PF3D7_0212400.1	3544	3558	4	3547, 3549, 3553, 3555	15	No
PF3D7_0212400.1	3620	3645	7	3621, 3625, 3628, 3630, 3636, 3637, 3640	26	No
PF3D7_0212400.1	3667	3691	9	3672, 3675, 3676, 3680, 3682, 3683, 3684, 3685, 3686	25	No
PF3D7_0212400.1	3952	3980	10	3957, 3960, 3961, 3962, 3964, 3966, 3968, 3970, 3973, 3975	29	No
PF3D7_0212500.1	1	16	5	3, 6, 9, 10, 11	16	No
PF3D7_0212500.1	19	36	6	24, 25, 28, 29, 31, 35	18	No
PF3D7_0212500.1	44	54	3	45, 49, 52	11	No
PF3D7_0212500.1	126	145	7	131, 132, 133, 137, 138, 139, 140	20	No
PF3D7_0212500.1	204	259	26	209, 210, 211, 213, 214, 218, 221, 223, 226, 227, 228, 231, 232, 233, 236, 237, 238, 241, 242, 243, 246, 247, 248, 249, 254, 255	56	No
PF3D7_0212500.1	272	301	7	277, 280, 281, 286, 291, 295, 296	30	No
PF3D7_0212500.1	421	439	5	426, 429, 430, 431, 434	19	No
PF3D7_0212500.1	641	656	3	646, 650, 651	16	No
PF3D7_0212500.1	939	949	3	941, 944, 949	11	No
PF3D7_0212500.1	950	965	4	955, 956, 959, 960	16	No
PF3D7_0212500.1	1064	1074	3	1067, 1069, 1073	11	No
PF3D7_0212500.1	1327	1342	4	1327, 1332, 1333, 1337	16	No
PF3D7_0212500.1	1431	1446	3	1436, 1437, 1441	16	No
PF3D7_0212500.1	1498	1514	4	1503, 1507, 1508, 1509	17	No
PF3D7_0212500.1	1665	1680	4	1670, 1672, 1675, 1679	16	No
PF3D7_0212500.1	1741	1755	3	1746, 1749, 1750	15	No
PF3D7_0212500.1	1810	1823	3	1815, 1817, 1818	14	No
PF3D7_0212500.1	1912	1924	3	1917, 1918, 1919	13	No
PF3D7_0212500.1	2078	2093	3	2083, 2087, 2088	16	No
PF3D7_0212500.1	2166	2185	6	2167, 2171, 2173, 2176, 2180, 2183	20	No
PF3D7_0212500.1	2213	2226	3	2218, 2220, 2221	14	No
PF3D7_0212500.1	2258	2268	3	2259, 2263, 2268	11	No
PF3D7_0212500.1	2365	2378	4	2370, 2371, 2372, 2373	14	No
PF3D7_0212500.1	2753	2768	3	2758, 2760, 2763	16	No
PF3D7_0212500.1	2820	2837	6	2820, 2825, 2826, 2829, 2831, 2832	18	No
PF3D7_0212500.1	2889	2901	3	2894, 2895, 2896	13	No
PF3D7_0212500.1	2913	2928	4	2916, 2918, 2922, 2923	16	No
PF3D7_0212500.1	3040	3052	3	3045, 3046, 3047	13	No
PF3D7_0212500.1	3093	3103	3	3094, 3098, 3103	11	No
PF3D7_0212500.1	3144	3161	5	3149, 3152, 3153, 3155, 3156	18	No
PF3D7_0212500.1	3167	3183	4	3172, 3176, 3177, 3178	17	No
PF3D7_0212500.1	3576	3586	3	3578, 3581, 3584	11	No
PF3D7_0212500.1	3591	3609	6	3596, 3598, 3599, 3600, 3603, 3604	19	No
PF3D7_0212500.1	3613	3640	8	3618, 3619, 3621, 3626, 3628, 3630, 3632, 3635	28	No
PF3D7_0212500.1	3640	3670	12	3645, 3646, 3648, 3649, 3650, 3652, 3657, 3658, 3660, 3661, 3664, 3665	31	No
PF3D7_0212500.1	3896	3926	8	3901, 3902, 3906, 3909, 3912, 3918, 3919, 3921	31	No
PF3D7_0212900.1	4	14	3	8, 9, 14	11	No
PF3D7_0212900.1	180	190	3	180, 185, 190	11	No
PF3D7_0212900.1	266	280	4	271, 272, 273, 275	15	No
PF3D7_0213700.1	1	25	9	2, 5, 6, 8, 9, 14, 17, 20, 25	25	No
PF3D7_0213700.1	30	43	3	35, 36, 38	14	No
PF3D7_0213700.1	102	117	3	107, 110, 112	16	No
PF3D7_0214000.1	326	341	4	330, 331, 336, 337	16	No
PF3D7_0214000.1	342	355	3	347, 348, 350	14	No
PF3D7_0214100.1	191	206	5	196, 197, 199, 200, 201	16	No
PF3D7_0214100.1	223	235	4	228, 229, 230, 235	13	No
PF3D7_0214100.1	249	270	8	254, 256, 258, 259, 260, 262, 265, 269	22	No
PF3D7_0214100.1	437	447	3	437, 442, 444	11	No
PF3D7_0214100.1	681	691	3	681, 686, 690	11	No
PF3D7_0214100.1	1021	1035	5	1026, 1027, 1028, 1029, 1030	15	No
PF3D7_0214100.1	1035	1045	3	1037, 1040, 1044	11	No
PF3D7_0214100.1	1054	1067	5	1054, 1059, 1060, 1061, 1062	14	No
PF3D7_0214100.1	1067	1077	3	1068, 1072, 1076	11	No
PF3D7_0214100.1	1077	1113	10	1082, 1085, 1087, 1088, 1091, 1098, 1099, 1103, 1107, 1108	37	No
PF3D7_0214100.1	1145	1158	3	1150, 1151, 1153	14	No
PF3D7_0214100.1	1173	1192	6	1178, 1179, 1183, 1184, 1186, 1187	20	No
PF3D7_0214100.1	1202	1217	5	1207, 1208, 1209, 1212, 1217	16	No
PF3D7_0214100.1	1218	1231	3	1223, 1225, 1226	14	No
PF3D7_0214100.1	1238	1252	5	1243, 1245, 1246, 1247, 1252	15	No
PF3D7_0214100.1	1267	1281	3	1272, 1275, 1276	15	No
PF3D7_0214100.1	1304	1324	8	1307, 1309, 1313, 1314, 1316, 1317, 1318, 1319	21	No
PF3D7_0214100.1	1334	1356	8	1339, 1340, 1341, 1346, 1347, 1348, 1350, 1351	23	No
PF3D7_0214100.1	1398	1412	3	1403, 1404, 1407	15	No
PF3D7_0214300.1	20	34	3	25, 26, 29	15	No
PF3D7_0214300.1	39	56	6	40, 44, 46, 49, 50, 51	18	No
PF3D7_0214300.1	219	229	3	221, 224, 227	11	No
PF3D7_0214300.1	238	252	3	243, 244, 247	15	No
PF3D7_0214300.1	267	283	6	272, 274, 275, 276, 278, 283	17	No
PF3D7_0214300.1	370	385	3	375, 379, 380	16	No
PF3D7_0214300.1	818	836	5	823, 824, 826, 828, 831	19	No
PF3D7_0214300.1	841	854	3	846, 847, 849	14	No
PF3D7_0214300.1	886	896	3	889, 891, 896	11	No
PF3D7_0214300.1	964	985	9	964, 969, 970, 971, 974, 975, 976, 979, 980	22	No
PF3D7_0214300.1	1014	1040	11	1019, 1020, 1021, 1024, 1025, 1026, 1029, 1030, 1031, 1034, 1035	27	No
PF3D7_0214300.1	1049	1109	17	1049, 1054, 1059, 1064, 1065, 1069, 1074, 1075, 1079, 1084, 1085, 1089, 1094, 1095, 1099, 1104, 1105	61	No
PF3D7_0214300.1	1152	1190	13	1153, 1157, 1159, 1164, 1166, 1169, 1175, 1177, 1179, 1180, 1182, 1183, 1185	39	No
PF3D7_0214300.1	1205	1221	5	1210, 1213, 1214, 1215, 1216	17	No
PF3D7_0214300.1	1235	1245	3	1236, 1240, 1242	11	No
PF3D7_0214300.1	1245	1279	10	1250, 1251, 1252, 1259, 1262, 1263, 1268, 1269, 1274, 1275	35	Yes
PF3D7_0214300.1	1393	1408	3	1398, 1399, 1403	16	No
PF3D7_0214300.1	1419	1439	8	1424, 1425, 1427, 1428, 1431, 1432, 1433, 1434	21	No
PF3D7_0214300.1	1681	1696	3	1686, 1687, 1691	16	No
PF3D7_0214300.1	1699	1709	3	1700, 1704, 1706	11	No
PF3D7_0214300.1	1962	1977	4	1964, 1967, 1970, 1972	16	No
PF3D7_0214300.1	1978	1988	3	1980, 1983, 1988	11	No
PF3D7_0214300.1	2090	2114	6	2092, 2095, 2100, 2105, 2109, 2111	25	No
PF3D7_0214300.1	2140	2173	10	2144, 2145, 2150, 2153, 2154, 2156, 2157, 2163, 2165, 2168	34	No
PF3D7_0214700.1	125	140	4	127, 130, 135, 138	16	No
PF3D7_0214700.1	142	156	3	147, 150, 151	15	No
PF3D7_0214700.1	163	173	3	163, 168, 171	11	No
PF3D7_0214700.1	200	210	3	202, 205, 208	11	No
PF3D7_0214800.1	170	182	3	175, 176, 177	13	No
PF3D7_0214800.1	282	294	5	282, 287, 288, 289, 294	13	No
PF3D7_0214800.1	689	718	10	689, 694, 696, 697, 702, 706, 709, 710, 711, 713	30	No
PF3D7_0214800.1	867	887	5	872, 874, 877, 879, 882	21	No
PF3D7_0215300.1	39	49	3	40, 44, 46	11	No
PF3D7_0215300.1	228	238	3	231, 233, 237	11	No
PF3D7_0215300.1	238	254	4	243, 245, 246, 249	17	No
PF3D7_0215300.1	283	297	3	288, 289, 292	15	No
PF3D7_0215300.1	503	517	3	508, 510, 512	15	No
PF3D7_0215300.1	518	542	8	521, 523, 527, 530, 531, 534, 536, 537	25	No
PF3D7_0215300.1	580	590	3	583, 585, 590	11	No
PF3D7_0215300.1	770	827	18	775, 778, 779, 781, 784, 789, 791, 797, 798, 799, 805, 806, 807, 813, 815, 820, 821, 822	58	No
PF3D7_0215300.1	847	864	4	852, 855, 856, 859	18	No
PF3D7_0215400.1	252	267	4	257, 258, 261, 262	16	No
PF3D7_0215400.1	281	311	9	283, 286, 289, 292, 294, 297, 303, 305, 306	31	No
PF3D7_0215400.1	443	458	4	448, 449, 453, 457	16	No
PF3D7_0215400.1	462	489	6	467, 468, 472, 481, 482, 484	28	No
PF3D7_0215400.1	509	523	4	514, 515, 518, 521	15	No
PF3D7_0215400.1	590	629	18	595, 596, 597, 599, 600, 601, 608, 609, 610, 611, 613, 614, 615, 616, 617, 621, 622, 624	40	No
PF3D7_0215400.1	673	688	4	678, 680, 683, 686	16	No
PF3D7_0215400.1	704	770	27	707, 709, 714, 715, 716, 718, 722, 723, 726, 729, 730, 734, 736, 738, 742, 743, 746, 747, 749, 751, 752, 756, 757, 760, 761, 763, 765	67	No
PF3D7_0215400.1	772	787	4	777, 778, 782, 786	16	No
PF3D7_0215400.1	861	885	8	866, 867, 871, 874, 875, 877, 878, 880	25	No
PF3D7_0215700.1	125	138	4	130, 131, 132, 133	14	No
PF3D7_0215700.1	241	275	10	246, 249, 250, 253, 258, 260, 263, 265, 267, 270	35	No
PF3D7_0215700.1	418	430	3	423, 424, 425	13	No
PF3D7_0215700.1	460	470	3	460, 465, 469	11	No
PF3D7_0215700.1	488	504	5	493, 494, 495, 496, 499	17	No
PF3D7_0215700.1	734	751	5	734, 739, 743, 744, 746	18	No
PF3D7_0215700.1	902	926	8	907, 908, 909, 910, 915, 919, 921, 925	25	No
PF3D7_0215700.1	937	971	13	939, 942, 946, 947, 949, 950, 953, 955, 956, 960, 961, 966, 970	35	No
PF3D7_0215700.1	993	1036	20	998, 1000, 1001, 1002, 1003, 1005, 1006, 1007, 1008, 1011, 1012, 1015, 1018, 1019, 1021, 1023, 1025, 1027, 1028, 1031	44	No
PF3D7_0215700.1	1040	1052	3	1045, 1046, 1047	13	No
PF3D7_0215700.1	1053	1083	7	1058, 1060, 1063, 1071, 1075, 1076, 1078	31	No
PF3D7_0215800.1	23	38	4	28, 29, 33, 37	16	No
PF3D7_0215800.1	42	84	14	47, 49, 50, 54, 58, 60, 62, 63, 65, 66, 70, 76, 79, 84	43	No
PF3D7_0215800.1	159	178	5	164, 168, 169, 170, 173	20	No
PF3D7_0215800.1	202	233	13	202, 207, 208, 211, 213, 214, 215, 216, 219, 221, 224, 228, 232	32	No
PF3D7_0215800.1	329	344	3	334, 336, 339	16	No
PF3D7_0215800.1	412	426	4	412, 417, 419, 421	15	No
PF3D7_0215800.1	429	444	3	434, 435, 439	16	No
PF3D7_0215800.1	676	691	3	681, 685, 686	16	No
PF3D7_0215800.1	756	771	4	758, 761, 764, 766	16	No
PF3D7_0216400.1	206	222	5	211, 212, 213, 217, 221	17	No
PF3D7_0216400.1	251	261	3	255, 256, 261	11	No
PF3D7_0216400.1	487	497	3	488, 492, 496	11	No
PF3D7_0216600.1	24	37	4	29, 30, 32, 36	14	No
PF3D7_0216600.1	91	105	4	96, 97, 100, 103	15	No
PF3D7_0216600.1	117	127	3	118, 122, 124	11	No
PF3D7_0216600.1	203	213	3	206, 208, 213	11	No
PF3D7_0216600.1	261	281	9	266, 267, 269, 270, 271, 273, 274, 275, 276	21	No
PF3D7_0216600.1	323	343	5	328, 332, 333, 338, 339	21	No
PF3D7_0216600.1	347	363	4	352, 355, 356, 358	17	No
PF3D7_0216600.1	589	608	7	589, 594, 596, 597, 599, 602, 603	20	No
PF3D7_0216600.1	627	680	16	632, 635, 636, 637, 640, 646, 650, 651, 654, 656, 661, 662, 667, 671, 675, 677	54	No
PF3D7_0216700.1	5	20	3	10, 11, 15	16	Yes
PF3D7_0216700.1	56	71	3	61, 62, 66	16	No
PF3D7_0216700.1	72	91	5	72, 77, 81, 82, 86	20	No
PF3D7_0216700.1	100	110	3	102, 105, 110	11	No
PF3D7_0216700.1	372	384	3	377, 378, 379	13	No
PF3D7_0216700.1	1242	1257	3	1247, 1251, 1252	16	No
PF3D7_0216800.1	130	140	3	130, 135, 137	11	No
PF3D7_0216800.1	298	312	3	303, 306, 307	15	No
PF3D7_0216800.1	336	346	3	336, 341, 344	11	No
PF3D7_0216800.1	445	460	5	445, 450, 451, 453, 455	16	No
PF3D7_0216800.1	616	631	3	621, 625, 626	16	No
PF3D7_0217500.1	1	12	4	3, 4, 6, 7	12	Yes
PF3D7_0217500.1	12	30	5	14, 17, 20, 25, 28	19	No
PF3D7_0217500.1	92	105	3	97, 98, 100	14	No
PF3D7_0217500.1	211	225	3	216, 217, 220	15	No
PF3D7_0217500.1	464	474	3	466, 469, 473	11	No
PF3D7_0217600.1	22	41	5	27, 30, 31, 34, 36	20	No
PF3D7_0217600.1	44	59	4	49, 50, 54, 56	16	No
PF3D7_0217600.1	338	356	5	343, 344, 346, 351, 352	19	No
PF3D7_0217600.1	386	415	10	391, 392, 393, 396, 398, 400, 403, 406, 407, 410	30	No
PF3D7_0217600.1	434	449	4	439, 441, 444, 449	16	No
PF3D7_0217600.1	466	481	3	471, 475, 476	16	No
PF3D7_0217600.1	705	744	12	710, 713, 715, 716, 721, 723, 724, 725, 734, 735, 736, 739	40	No
PF3D7_0217600.1	1000	1018	6	1003, 1005, 1009, 1010, 1012, 1013	19	No
PF3D7_0217600.1	1091	1144	23	1096, 1097, 1099, 1100, 1101, 1102, 1103, 1106, 1108, 1111, 1113, 1116, 1117, 1118, 1119, 1121, 1122, 1125, 1130, 1133, 1134, 1139, 1140	54	No
PF3D7_0217600.1	1173	1187	3	1178, 1180, 1182	15	No
PF3D7_0217600.1	1239	1254	6	1244, 1245, 1246, 1247, 1248, 1249	16	Yes
PF3D7_0217600.1	1271	1290	6	1276, 1277, 1281, 1282, 1285, 1289	20	No
PF3D7_0217600.1	1323	1337	4	1324, 1328, 1332, 1336	15	No
PF3D7_0217600.1	1379	1419	15	1384, 1388, 1389, 1392, 1393, 1394, 1395, 1396, 1397, 1403, 1404, 1409, 1411, 1412, 1414	41	No
PF3D7_0217600.1	1491	1515	8	1496, 1498, 1499, 1501, 1503, 1505, 1510, 1512	25	No
PF3D7_0217600.1	1571	1637	20	1576, 1580, 1581, 1584, 1586, 1588, 1590, 1592, 1596, 1600, 1604, 1608, 1612, 1616, 1619, 1625, 1629, 1630, 1631, 1632	67	No
PF3D7_0217700.1	127	141	4	132, 133, 134, 136	15	No
PF3D7_0217800.1	52	66	4	57, 59, 60, 61	15	No
PF3D7_0218100.1	28	64	10	32, 33, 38, 39, 47, 50, 51, 57, 59, 64	37	No
PF3D7_0218200.1	5	15	3	5, 10, 11	11	No
PF3D7_0218200.1	115	127	3	120, 121, 122	13	No
PF3D7_0218200.1	580	590	3	582, 585, 588	11	No
PF3D7_0218200.1	628	643	4	632, 633, 638, 643	16	No
PF3D7_0218200.1	776	788	4	776, 781, 783, 787	13	No
PF3D7_0218600.1	9	19	3	10, 14, 17	11	No
PF3D7_0218600.1	46	63	4	51, 53, 56, 58	18	No
PF3D7_0218600.1	283	293	3	285, 288, 292	11	No
PF3D7_0218600.1	296	310	3	301, 304, 305	15	No
PF3D7_0218600.1	386	399	5	387, 391, 393, 394, 399	14	No
PF3D7_0218600.1	401	414	3	406, 407, 409	14	No
PF3D7_0218600.1	534	552	4	539, 543, 544, 547	19	No
PF3D7_0218600.1	837	847	3	838, 842, 844	11	No
PF3D7_0218600.1	1012	1028	4	1017, 1018, 1019, 1023	17	No
PF3D7_0218600.1	1340	1356	4	1345, 1346, 1347, 1351	17	No
PF3D7_0218600.1	1452	1462	3	1452, 1457, 1458	11	No
PF3D7_0218600.1	1517	1527	3	1517, 1522, 1524	11	No
PF3D7_0218600.1	1529	1543	4	1530, 1534, 1536, 1538	15	No
PF3D7_0218600.1	1829	1843	3	1834, 1837, 1838	15	No
PF3D7_0218600.1	1861	1879	5	1866, 1867, 1869, 1874, 1878	19	Yes
PF3D7_0218600.1	1879	1903	7	1884, 1886, 1887, 1892, 1896, 1898, 1903	25	No
PF3D7_0218600.1	1947	1957	3	1947, 1952, 1956	11	No
PF3D7_0218600.1	1970	1984	4	1971, 1975, 1977, 1979	15	No
PF3D7_0218600.1	2060	2077	5	2063, 2065, 2070, 2072, 2077	18	No
PF3D7_0218600.1	2196	2209	4	2201, 2202, 2203, 2204	14	No
PF3D7_0218600.1	2309	2327	5	2309, 2314, 2317, 2322, 2323	19	No
PF3D7_0218600.1	2368	2380	3	2373, 2375, 2377	13	No
PF3D7_0218700.1	231	246	4	233, 236, 241, 243	16	No
PF3D7_0218700.1	432	446	3	437, 440, 441	15	No
PF3D7_0219400.1	10	24	3	15, 17, 19	15	No
PF3D7_0219600.1	22	34	3	27, 28, 29	13	No
PF3D7_0219600.1	45	59	4	48, 50, 54, 58	15	No
PF3D7_0219600.1	68	108	13	73, 76, 77, 81, 86, 87, 89, 90, 94, 97, 98, 103, 104	41	No
PF3D7_0219600.1	111	121	3	112, 116, 118	11	No
PF3D7_0219600.1	142	154	4	143, 147, 149, 153	13	No
PF3D7_0219600.1	167	188	7	169, 172, 175, 176, 180, 182, 183	22	No
PF3D7_0219600.1	305	323	5	310, 311, 313, 315, 318	19	No
PF3D7_0219600.1	418	438	5	422, 423, 428, 431, 433	21	No
PF3D7_0219600.1	811	828	5	811, 816, 820, 823, 828	18	No
PF3D7_0219600.1	840	856	4	845, 846, 850, 851	17	No
PF3D7_0219600.1	886	904	5	888, 891, 894, 895, 899	19	No
PF3D7_0219700.1	80	103	7	85, 86, 90, 91, 96, 97, 98	24	No
PF3D7_0219700.1	113	127	3	118, 119, 122	15	No
PF3D7_0220000.1	1	18	6	2, 4, 6, 8, 12, 13	18	No
PF3D7_0220000.1	62	77	4	63, 67, 72, 77	16	No
PF3D7_0220000.1	113	127	3	118, 120, 122	15	No
PF3D7_0220000.1	163	173	3	163, 168, 170	11	No
PF3D7_0220000.1	249	279	9	254, 257, 258, 262, 265, 266, 270, 273, 274	31	No
PF3D7_0220000.1	297	311	4	298, 302, 306, 310	15	No
PF3D7_0220000.1	369	379	3	370, 374, 378	11	No
PF3D7_0220000.1	385	395	3	386, 390, 394	11	No
PF3D7_0220000.1	449	459	3	450, 454, 458	11	No
PF3D7_0220000.1	587	597	3	589, 592, 597	11	No
PF3D7_0220000.1	629	648	6	634, 635, 638, 640, 641, 643	20	No
PF3D7_0220000.1	708	723	4	713, 715, 716, 718	16	No
PF3D7_0220000.1	756	766	3	757, 761, 764	11	No
PF3D7_0220000.1	791	805	5	791, 796, 799, 800, 805	15	No
PF3D7_0220000.1	833	845	3	838, 839, 840	13	No
PF3D7_0220000.1	888	898	3	891, 893, 897	11	No
PF3D7_0220000.1	942	963	6	947, 951, 952, 954, 958, 960	22	No
PF3D7_0220000.1	1113	1123	3	1113, 1118, 1121	11	No
PF3D7_0220000.1	1462	1478	6	1467, 1468, 1469, 1470, 1473, 1478	17	No
PF3D7_0220000.1	1547	1558	3	1552, 1554, 1557	12	No
PF3D7_0220600.1	38	48	3	38, 43, 48	11	No
PF3D7_0220600.1	120	135	3	125, 126, 130	16	No
PF3D7_0220600.1	145	155	3	145, 150, 154	11	No
PF3D7_0221000.1	184	244	25	185, 189, 193, 195, 197, 199, 201, 205, 207, 209, 211, 213, 215, 217, 219, 221, 223, 225, 227, 229, 231, 233, 235, 237, 239	61	No
PF3D7_0221200.1	55	70	5	60, 62, 64, 65, 70	16	No
PF3D7_0221200.1	118	133	3	123, 126, 128	16	No
PF3D7_0301300.1	292	307	3	297, 301, 302	16	No
PF3D7_0301700.1	103	141	11	108, 111, 112, 117, 118, 123, 124, 126, 131, 135, 136	39	No
PF3D7_0302100.1	1	42	17	4, 6, 8, 10, 13, 15, 16, 17, 18, 19, 23, 24, 29, 30, 32, 37, 40	42	No
PF3D7_0302100.1	89	103	4	94, 96, 97, 98	15	No
PF3D7_0302100.1	213	227	3	218, 221, 222	15	No
PF3D7_0302100.1	286	298	3	291, 292, 293	13	No
PF3D7_0302100.1	331	344	3	336, 337, 339	14	No
PF3D7_0302100.1	498	519	7	503, 505, 508, 511, 512, 513, 514	22	No
PF3D7_0302100.1	596	606	3	598, 601, 605	11	No
PF3D7_0302100.1	675	692	5	680, 682, 683, 687, 689	18	No
PF3D7_0302100.1	832	848	5	832, 837, 840, 842, 843	17	No
PF3D7_0302100.1	877	903	7	880, 882, 887, 892, 893, 898, 899	27	No
PF3D7_0302100.1	943	953	3	944, 948, 953	11	No
PF3D7_0302100.1	969	979	3	969, 974, 975	11	No
PF3D7_0302100.1	1002	1021	6	1004, 1007, 1010, 1011, 1014, 1016	20	No
PF3D7_0302100.1	1049	1059	3	1051, 1054, 1057	11	No
PF3D7_0302100.1	1105	1115	3	1108, 1110, 1114	11	No
PF3D7_0302100.1	1207	1223	4	1212, 1215, 1217, 1218	17	No
PF3D7_0302500.1	141	156	3	146, 148, 151	16	No
PF3D7_0302500.1	332	346	5	333, 337, 339, 340, 341	15	Yes
PF3D7_0302500.1	1112	1136	8	1113, 1117, 1119, 1120, 1121, 1126, 1129, 1131	25	No
PF3D7_0302500.1	1182	1197	4	1186, 1187, 1192, 1195	16	No
PF3D7_0302500.1	1376	1392	5	1381, 1382, 1383, 1384, 1387	17	No
PF3D7_0302600.1	117	127	3	120, 122, 126	11	No
PF3D7_0302600.1	138	159	6	139, 143, 148, 151, 154, 157	22	No
PF3D7_0302600.1	187	201	3	192, 194, 196	15	No
PF3D7_0302600.1	651	665	3	656, 658, 660	15	No
PF3D7_0302600.1	806	823	6	811, 812, 813, 814, 818, 820	18	No
PF3D7_0302600.1	831	901	20	832, 836, 838, 843, 846, 851, 854, 859, 862, 867, 870, 875, 879, 880, 882, 884, 889, 894, 895, 896	71	No
PF3D7_0302600.1	917	931	3	922, 924, 926	15	No
PF3D7_0302600.1	1129	1154	12	1134, 1135, 1136, 1137, 1138, 1139, 1140, 1142, 1144, 1145, 1149, 1152	26	No
PF3D7_0302900.1	52	68	4	57, 58, 61, 63	17	No
PF3D7_0302900.1	217	230	4	222, 224, 225, 230	14	No
PF3D7_0302900.1	414	426	3	419, 420, 421	13	No
PF3D7_0302900.1	431	454	8	436, 437, 438, 440, 444, 445, 446, 449	24	No
PF3D7_0302900.1	466	492	6	471, 472, 476, 485, 486, 487	27	No
PF3D7_0302900.1	526	543	4	531, 533, 534, 538	18	No
PF3D7_0302900.1	583	593	3	585, 588, 592	11	No
PF3D7_0302900.1	595	621	6	600, 601, 603, 612, 614, 616	27	Yes
PF3D7_0302900.1	1179	1189	3	1182, 1184, 1188	11	No
PF3D7_0303000.1	176	192	5	181, 182, 185, 187, 192	17	No
PF3D7_0303000.1	371	384	4	376, 377, 378, 379	14	No
PF3D7_0303000.1	447	462	3	452, 456, 457	16	No
PF3D7_0303000.1	478	491	3	483, 485, 486	14	No
PF3D7_0303000.1	574	590	5	574, 579, 582, 583, 585	17	No
PF3D7_0303000.1	699	713	5	704, 705, 706, 707, 708	15	No
PF3D7_0303100.1	99	112	3	104, 105, 107	14	No
PF3D7_0303100.1	148	163	3	153, 154, 158	16	No
PF3D7_0303100.1	193	210	5	198, 202, 203, 205, 209	18	No
PF3D7_0303100.1	563	573	3	564, 568, 570	11	No
PF3D7_0303100.1	768	797	11	773, 776, 777, 778, 779, 780, 781, 786, 787, 790, 792	30	No
PF3D7_0303100.1	1038	1048	3	1039, 1043, 1045	11	No
PF3D7_0303100.1	1138	1152	3	1143, 1144, 1147	15	No
PF3D7_0303100.1	1183	1202	5	1183, 1188, 1192, 1194, 1197	20	No
PF3D7_0303100.1	1221	1235	3	1226, 1228, 1230	15	No
PF3D7_0303100.1	1268	1278	3	1272, 1273, 1278	11	No
PF3D7_0303100.1	1302	1314	3	1307, 1308, 1309	13	No
PF3D7_0303200.1	100	120	6	105, 106, 109, 110, 115, 116	21	No
PF3D7_0303200.1	123	133	3	126, 128, 132	11	No
PF3D7_0303200.1	153	178	7	158, 159, 163, 165, 170, 173, 176	26	No
PF3D7_0303200.1	240	255	3	245, 248, 250	16	No
PF3D7_0303200.1	259	278	5	259, 264, 269, 272, 273	20	No
PF3D7_0303200.1	280	299	6	285, 287, 288, 289, 292, 294	20	No
PF3D7_0303200.1	311	321	3	314, 316, 321	11	No
PF3D7_0303200.1	355	372	5	360, 363, 364, 367, 372	18	No
PF3D7_0303200.1	389	402	4	391, 394, 397, 402	14	No
PF3D7_0303200.1	484	494	3	485, 489, 491	11	No
PF3D7_0303200.1	556	638	22	557, 561, 563, 565, 569, 574, 577, 581, 585, 589, 593, 597, 601, 605, 609, 613, 617, 621, 625, 629, 633, 637	83	No
PF3D7_0303200.1	653	670	5	658, 659, 660, 664, 665	18	No
PF3D7_0303200.1	748	758	3	749, 753, 756	11	No
PF3D7_0303200.1	793	808	4	798, 799, 801, 803	16	No
PF3D7_0303200.1	819	839	6	824, 825, 829, 830, 834, 836	21	No
PF3D7_0303200.1	856	894	10	861, 864, 866, 870, 873, 878, 881, 884, 885, 889	39	No
PF3D7_0303200.1	895	910	5	897, 900, 904, 905, 910	16	No
PF3D7_0303200.1	1101	1116	4	1106, 1107, 1108, 1111	16	No
PF3D7_0303200.1	1145	1162	6	1148, 1150, 1155, 1159, 1161, 1162	18	No
PF3D7_0303300.1	45	60	3	50, 52, 55	16	No
PF3D7_0303300.1	92	102	3	92, 97, 98	11	No
PF3D7_0303500.1	87	104	4	92, 95, 97, 99	18	No
PF3D7_0303500.1	166	182	4	171, 174, 176, 177	17	No
PF3D7_0303500.1	232	251	6	234, 237, 241, 242, 246, 248	20	No
PF3D7_0303500.1	254	271	4	259, 261, 262, 266	18	No
PF3D7_0303500.1	290	305	4	295, 296, 300, 304	16	No
PF3D7_0303500.1	485	499	4	490, 491, 492, 494	15	No
PF3D7_0303500.1	574	584	3	574, 579, 580	11	No
PF3D7_0303500.1	691	706	4	696, 697, 701, 704	16	No
PF3D7_0303500.1	707	727	7	712, 714, 716, 717, 719, 720, 722	21	No
PF3D7_0303500.1	741	776	16	746, 748, 749, 750, 753, 754, 755, 758, 759, 760, 763, 764, 767, 769, 770, 771	36	No
PF3D7_0303500.1	854	871	5	859, 860, 861, 863, 866	18	Yes
PF3D7_0303500.1	1190	1203	3	1195, 1196, 1198	14	No
PF3D7_0303500.1	1206	1218	4	1207, 1211, 1213, 1217	13	No
PF3D7_0303500.1	1339	1353	3	1344, 1347, 1348	15	No
PF3D7_0303500.1	1481	1499	5	1481, 1486, 1491, 1494, 1498	19	No
PF3D7_0303500.1	1846	1856	3	1849, 1851, 1856	11	No
PF3D7_0303500.1	1899	1914	3	1904, 1908, 1909	16	No
PF3D7_0303500.1	1928	1938	3	1930, 1933, 1937	11	No
PF3D7_0303500.1	2008	2023	4	2010, 2013, 2018, 2019	16	No
PF3D7_0303500.1	2101	2116	4	2106, 2107, 2110, 2111	16	No
PF3D7_0303500.1	2177	2201	6	2182, 2186, 2187, 2194, 2195, 2196	25	No
PF3D7_0303500.1	2213	2226	5	2214, 2218, 2220, 2221, 2222	14	No
PF3D7_0304100.1	2	19	5	4, 7, 10, 14, 18	18	Yes
PF3D7_0304100.1	261	271	3	261, 266, 269	11	No
PF3D7_0304100.1	354	364	3	358, 359, 364	11	No
PF3D7_0304100.1	378	397	5	383, 386, 387, 390, 392	20	No
PF3D7_0304100.1	410	424	3	415, 416, 419	15	No
PF3D7_0304100.1	505	525	8	510, 511, 512, 514, 518, 519, 520, 522	21	No
PF3D7_0304800.1	640	655	3	645, 646, 650	16	No
PF3D7_0304800.1	801	813	3	806, 807, 808	13	No
PF3D7_0304800.1	878	894	5	880, 883, 886, 889, 892	17	No
PF3D7_0305100.1	18	31	4	23, 24, 26, 31	14	No
PF3D7_0305100.1	165	180	3	170, 173, 175	16	No
PF3D7_0305100.1	222	239	5	227, 228, 232, 233, 234	18	No
PF3D7_0305100.1	412	422	3	415, 417, 421	11	No
PF3D7_0305100.1	442	458	4	447, 451, 452, 453	17	No
PF3D7_0305100.1	458	474	4	463, 464, 466, 469	17	No
PF3D7_0305100.1	537	551	4	537, 542, 545, 546	15	No
PF3D7_0305100.1	646	660	3	651, 654, 655	15	No
PF3D7_0305100.1	686	704	5	689, 691, 695, 698, 699	19	No
PF3D7_0305100.1	717	727	3	717, 722, 723	11	No
PF3D7_0305100.1	765	793	10	770, 771, 772, 774, 777, 782, 785, 786, 787, 788	29	No
PF3D7_0305100.1	811	843	13	816, 818, 819, 821, 823, 824, 825, 828, 829, 833, 834, 837, 838	33	No
PF3D7_0305100.1	875	898	6	879, 880, 885, 888, 891, 893	24	No
PF3D7_0305100.1	937	951	4	942, 944, 945, 946	15	No
PF3D7_0305100.1	973	991	5	978, 979, 982, 983, 986	19	No
PF3D7_0305100.1	1035	1054	7	1040, 1043, 1044, 1046, 1047, 1048, 1049	20	No
PF3D7_0305100.1	1096	1119	6	1101, 1104, 1105, 1110, 1112, 1114	24	No
PF3D7_0305100.1	1161	1187	11	1162, 1166, 1169, 1170, 1174, 1175, 1176, 1178, 1179, 1182, 1187	27	No
PF3D7_0305100.1	1192	1208	5	1193, 1197, 1199, 1203, 1205	17	No
PF3D7_0305100.1	2292	2308	5	2292, 2297, 2300, 2303, 2306	17	Yes
PF3D7_0305100.1	2445	2458	3	2450, 2452, 2453	14	No
PF3D7_0305100.1	3094	3119	6	3094, 3099, 3104, 3109, 3114, 3119	26	No
PF3D7_0305100.1	3693	3703	3	3697, 3698, 3703	11	No
PF3D7_0305200.1	100	116	4	105, 107, 109, 111	17	No
PF3D7_0305200.1	137	152	4	142, 143, 145, 147	16	No
PF3D7_0305200.1	162	178	4	167, 168, 172, 173	17	No
PF3D7_0305200.1	179	197	6	184, 186, 187, 188, 191, 192	19	No
PF3D7_0305200.1	360	370	3	360, 365, 369	11	No
PF3D7_0305200.1	866	876	3	867, 871, 875	11	No
PF3D7_0305200.1	905	920	4	908, 910, 915, 917	16	No
PF3D7_0305200.1	992	1002	3	993, 997, 999	11	No
PF3D7_0305200.1	1023	1037	3	1028, 1031, 1032	15	No
PF3D7_0305200.1	1111	1121	3	1114, 1116, 1121	11	No
PF3D7_0305300.1	143	157	3	148, 151, 152	15	No
PF3D7_0305300.1	204	222	6	205, 209, 213, 215, 217, 221	19	No
PF3D7_0305300.1	313	330	4	318, 321, 323, 325	18	No
PF3D7_0305300.1	390	403	3	395, 397, 398	14	No
PF3D7_0305300.1	678	691	3	683, 684, 686	14	No
PF3D7_0305300.1	712	740	8	712, 717, 721, 724, 729, 730, 735, 740	29	No
PF3D7_0305500.1	264	295	9	269, 271, 274, 281, 282, 287, 288, 289, 290	32	No
PF3D7_0305500.1	385	397	3	390, 391, 392	13	No
PF3D7_0305500.1	451	469	5	454, 456, 460, 461, 464	19	No
PF3D7_0305500.1	490	512	7	492, 495, 498, 504, 506, 507, 512	23	No
PF3D7_0305500.1	656	666	3	657, 661, 663	11	No
PF3D7_0305500.1	984	997	3	989, 990, 992	14	No
PF3D7_0305500.1	1012	1030	5	1017, 1020, 1021, 1023, 1025	19	No
PF3D7_0305500.1	1285	1301	5	1285, 1290, 1294, 1295, 1296	17	No
PF3D7_0305500.1	1584	1596	3	1589, 1590, 1591	13	No
PF3D7_0305500.1	1609	1623	3	1614, 1616, 1618	15	No
PF3D7_0305500.1	1668	1685	5	1673, 1674, 1675, 1680, 1685	18	No
PF3D7_0305500.1	1727	1737	3	1730, 1732, 1737	11	No
PF3D7_0305500.1	1934	1944	3	1934, 1939, 1941	11	No
PF3D7_0305500.1	2203	2217	3	2208, 2210, 2212	15	No
PF3D7_0305500.1	2277	2294	5	2282, 2283, 2286, 2287, 2289	18	No
PF3D7_0305500.1	2297	2310	3	2302, 2303, 2305	14	No
PF3D7_0305500.1	2329	2343	5	2334, 2335, 2336, 2337, 2338	15	No
PF3D7_0305500.1	2393	2408	3	2398, 2401, 2403	16	No
PF3D7_0305500.1	2534	2555	6	2539, 2540, 2543, 2545, 2549, 2550	22	No
PF3D7_0305500.1	2670	2686	5	2675, 2677, 2679, 2680, 2681	17	No
PF3D7_0305500.1	2697	2710	3	2702, 2704, 2705	14	No
PF3D7_0305500.1	3336	3362	9	3341, 3343, 3344, 3345, 3346, 3351, 3352, 3354, 3357	27	No
PF3D7_0305500.1	3369	3416	16	3374, 3375, 3376, 3382, 3384, 3385, 3393, 3395, 3396, 3400, 3401, 3404, 3408, 3409, 3410, 3411	48	No
PF3D7_0305500.1	3471	3485	4	3476, 3477, 3480, 3484	15	No
PF3D7_0305500.1	3523	3542	5	3528, 3529, 3532, 3536, 3537	20	No
PF3D7_0305500.1	3544	3559	4	3545, 3549, 3554, 3559	16	No
PF3D7_0305500.1	3566	3578	3	3571, 3572, 3573	13	No
PF3D7_0305500.1	3609	3642	11	3614, 3616, 3617, 3625, 3626, 3628, 3629, 3631, 3632, 3637, 3639	34	No
PF3D7_0305500.1	3728	3769	15	3732, 3733, 3738, 3740, 3741, 3742, 3748, 3749, 3750, 3751, 3754, 3757, 3760, 3762, 3764	42	No
PF3D7_0305500.1	3769	3783	3	3774, 3777, 3778	15	No
PF3D7_0305500.1	3820	3841	6	3825, 3827, 3828, 3832, 3834, 3836	22	No
PF3D7_0305600.1	96	106	3	97, 101, 104	11	No
PF3D7_0305600.1	157	171	4	162, 163, 166, 171	15	No
PF3D7_0305600.1	282	292	3	282, 287, 292	11	No
PF3D7_0305700.1	24	46	6	25, 29, 34, 39, 41, 46	23	No
PF3D7_0305700.1	55	68	3	60, 61, 63	14	No
PF3D7_0305700.1	68	78	3	70, 73, 76	11	No
PF3D7_0305700.1	104	118	4	109, 110, 113, 117	15	No
PF3D7_0306100.1	89	99	3	90, 94, 96	11	No
PF3D7_0306100.1	140	152	3	145, 146, 147	13	No
PF3D7_0306100.1	244	254	3	248, 249, 254	11	No
PF3D7_0306100.1	306	323	5	311, 313, 314, 317, 318	18	No
PF3D7_0306100.1	372	391	6	372, 377, 381, 382, 386, 388	20	No
PF3D7_0306100.1	432	450	4	437, 440, 441, 445	19	No
PF3D7_0306100.1	513	526	3	518, 519, 521	14	No
PF3D7_0306100.1	606	618	3	611, 612, 613	13	No
PF3D7_0306700.1	20	35	4	25, 26, 29, 30	16	No
PF3D7_0306900.1	23	41	5	28, 29, 32, 36, 40	19	No
PF3D7_0306900.1	105	115	3	105, 110, 113	11	No
PF3D7_0307200.1	11	24	3	16, 18, 19	14	No
PF3D7_0307200.1	144	157	3	149, 151, 152	14	No
PF3D7_0307500.1	141	151	3	143, 146, 150	11	No
PF3D7_0307500.1	164	181	5	169, 170, 171, 173, 176	18	No
PF3D7_0307600.1	36	46	3	36, 41, 42	11	No
PF3D7_0307600.1	80	107	8	85, 89, 90, 94, 95, 97, 102, 104	28	No
PF3D7_0307600.1	124	194	30	129, 130, 132, 133, 134, 136, 141, 142, 145, 149, 153, 154, 157, 158, 161, 165, 166, 168, 169, 170, 172, 173, 175, 176, 179, 180, 182, 184, 189, 190	71	No
PF3D7_0307600.1	372	382	3	376, 377, 382	11	No
PF3D7_0307600.1	401	411	3	403, 406, 409	11	No
PF3D7_0307600.1	606	641	11	611, 612, 613, 615, 620, 623, 627, 630, 631, 633, 636	36	No
PF3D7_0307700.1	9	22	4	14, 15, 17, 22	14	No
PF3D7_0307700.1	73	95	6	74, 78, 80, 85, 89, 90	23	No
PF3D7_0307700.1	95	122	7	100, 102, 105, 106, 112, 113, 117	28	No
PF3D7_0307700.1	125	141	4	130, 131, 134, 136	17	No
PF3D7_0307700.1	238	258	6	240, 243, 247, 250, 253, 256	21	No
PF3D7_0307700.1	369	379	3	370, 374, 377	11	No
PF3D7_0307700.1	383	393	3	384, 388, 391	11	No
PF3D7_0307700.1	453	466	4	454, 458, 461, 464	14	No
PF3D7_0307700.1	468	478	3	471, 473, 477	11	No
PF3D7_0307700.1	498	526	9	503, 504, 508, 510, 513, 514, 516, 521, 524	29	No
PF3D7_0307700.1	543	553	3	543, 548, 552	11	No
PF3D7_0307700.1	559	578	6	564, 565, 569, 572, 573, 578	20	No
PF3D7_0307700.1	584	602	4	589, 592, 593, 597	19	No
PF3D7_0307700.1	605	618	4	610, 611, 612, 613	14	No
PF3D7_0307700.1	636	646	3	636, 641, 646	11	No
PF3D7_0307700.1	703	715	3	708, 709, 710	13	No
PF3D7_0307700.1	832	842	3	832, 837, 842	11	No
PF3D7_0307700.1	953	967	3	958, 961, 962	15	No
PF3D7_0307700.1	981	1001	8	981, 986, 987, 988, 990, 994, 995, 996	21	No
PF3D7_0307700.1	1351	1376	9	1352, 1356, 1359, 1363, 1365, 1368, 1369, 1370, 1371	26	No
PF3D7_0307700.1	1640	1657	6	1645, 1647, 1648, 1650, 1652, 1657	18	No
PF3D7_0307700.1	1697	1728	9	1702, 1706, 1707, 1708, 1716, 1718, 1719, 1722, 1723	32	No
PF3D7_0307700.1	1745	1760	4	1749, 1750, 1755, 1759	16	No
PF3D7_0307700.1	1783	1798	4	1783, 1788, 1793, 1795	16	No
PF3D7_0308100.1	33	55	7	38, 42, 43, 45, 46, 47, 50	23	No
PF3D7_0308100.1	388	401	3	393, 394, 396	14	No
PF3D7_0308100.1	477	492	4	479, 482, 485, 487	16	No
PF3D7_0308100.1	580	590	3	581, 585, 589	11	No
PF3D7_0308100.1	692	722	9	697, 699, 702, 704, 709, 711, 713, 717, 720	31	No
PF3D7_0308100.1	775	789	3	780, 781, 784	15	No
PF3D7_0308100.1	795	810	4	796, 800, 805, 810	16	No
PF3D7_0308100.1	828	840	3	833, 834, 835	13	No
PF3D7_0308100.1	914	929	3	919, 923, 924	16	No
PF3D7_0308100.1	934	948	4	935, 939, 943, 945	15	No
PF3D7_0308100.1	948	963	4	953, 955, 958, 962	16	No
PF3D7_0308100.1	971	988	6	971, 976, 977, 978, 981, 983	18	No
PF3D7_0308100.1	992	1011	7	997, 998, 999, 1000, 1001, 1005, 1006	20	No
PF3D7_0308100.1	1042	1104	20	1047, 1049, 1050, 1052, 1055, 1058, 1060, 1067, 1068, 1071, 1076, 1080, 1084, 1085, 1087, 1094, 1095, 1096, 1099, 1104	63	No
PF3D7_0308100.1	1157	1172	3	1162, 1166, 1167	16	No
PF3D7_0308100.1	1374	1386	3	1379, 1380, 1381	13	No
PF3D7_0308100.1	1499	1511	3	1504, 1505, 1506	13	No
PF3D7_0308100.1	1603	1613	3	1603, 1608, 1610	11	No
PF3D7_0308200.1	91	103	3	96, 97, 98	13	No
PF3D7_0308200.1	416	426	3	419, 421, 425	11	No
PF3D7_0308200.1	452	465	4	452, 457, 459, 460	14	No
PF3D7_0308200.1	466	484	4	471, 474, 475, 479	19	No
PF3D7_0308200.1	518	539	8	519, 523, 528, 529, 533, 536, 538, 539	22	No
PF3D7_0308300.1	8	27	6	13, 16, 17, 20, 21, 22	20	Yes
PF3D7_0308300.1	63	79	4	68, 70, 71, 74	17	No
PF3D7_0308300.1	146	163	5	151, 152, 153, 155, 158	18	No
PF3D7_0308300.1	183	200	4	188, 191, 192, 195	18	No
PF3D7_0308300.1	212	222	3	216, 217, 222	11	No
PF3D7_0308300.1	290	312	6	295, 296, 299, 302, 306, 307	23	No
PF3D7_0308300.1	312	333	8	313, 317, 320, 322, 323, 324, 328, 331	22	Yes
PF3D7_0308700.1	36	49	3	41, 43, 44	14	No
PF3D7_0308700.1	52	69	5	53, 57, 59, 64, 69	18	No
PF3D7_0308700.1	83	96	3	88, 90, 91	14	No
PF3D7_0308700.1	151	167	5	155, 156, 161, 162, 167	17	No
PF3D7_0308700.1	219	229	3	221, 224, 228	11	No
PF3D7_0308700.1	233	247	4	234, 238, 242, 245	15	No
PF3D7_0308700.1	284	298	4	285, 289, 292, 293	15	No
PF3D7_0308700.1	307	320	3	312, 313, 315	14	No
PF3D7_0308700.1	348	364	4	353, 355, 358, 359	17	No
PF3D7_0308700.1	364	378	4	367, 369, 373, 375	15	No
PF3D7_0308700.1	402	418	4	407, 408, 411, 413	17	Yes
PF3D7_0308900.1	8	28	5	13, 15, 18, 23, 24	21	No
PF3D7_0308900.1	70	80	3	70, 75, 76	11	No
PF3D7_0308900.1	125	140	4	130, 132, 133, 135	16	No
PF3D7_0308900.1	143	160	5	146, 148, 153, 154, 155	18	No
PF3D7_0308900.1	170	192	6	171, 175, 177, 183, 184, 187	23	No
PF3D7_0308900.1	215	225	3	215, 220, 223	11	No
PF3D7_0308900.1	264	282	5	266, 269, 273, 276, 277	19	No
PF3D7_0308900.1	319	332	3	324, 325, 327	14	No
PF3D7_0308900.1	377	396	6	379, 382, 387, 388, 390, 391	20	No
PF3D7_0308900.1	586	604	5	589, 591, 595, 599, 601	19	No
PF3D7_0309000.1	106	126	6	107, 111, 113, 116, 121, 125	21	No
PF3D7_0309000.1	133	143	3	136, 138, 143	11	No
PF3D7_0309000.1	213	226	3	218, 220, 221	14	No
PF3D7_0309000.1	228	242	4	233, 235, 237, 241	15	No
PF3D7_0309000.1	251	263	4	251, 256, 258, 262	13	No
PF3D7_0309000.1	287	300	3	292, 294, 295	14	No
PF3D7_0309000.1	382	397	3	387, 388, 392	16	No
PF3D7_0309200.1	35	50	3	40, 44, 45	16	No
PF3D7_0309200.1	113	134	6	118, 121, 122, 127, 128, 129	22	No
PF3D7_0309200.1	232	246	3	237, 240, 241	15	No
PF3D7_0309200.1	264	277	4	269, 270, 272, 277	14	No
PF3D7_0309200.1	383	399	5	388, 391, 392, 394, 399	17	No
PF3D7_0309200.1	442	456	4	447, 448, 450, 451	15	No
PF3D7_0309200.1	524	534	3	525, 529, 532	11	No
PF3D7_0309200.1	738	768	10	739, 743, 745, 749, 750, 754, 755, 760, 762, 763	31	No
PF3D7_0309200.1	861	891	10	866, 868, 869, 873, 880, 881, 882, 883, 884, 886	31	No
PF3D7_0309200.1	891	906	3	896, 900, 901	16	No
PF3D7_0309200.1	950	962	3	955, 956, 957	13	No
PF3D7_0309200.1	1017	1035	8	1022, 1023, 1024, 1026, 1027, 1028, 1029, 1030	19	No
PF3D7_0309200.1	1041	1056	3	1046, 1050, 1051	16	No
PF3D7_0309200.1	1197	1207	3	1198, 1202, 1204	11	No
PF3D7_0309200.1	1287	1305	5	1290, 1292, 1297, 1298, 1300	19	No
PF3D7_0309300.1	34	44	3	34, 39, 43	11	No
PF3D7_0309300.1	342	357	4	347, 348, 351, 352	16	No
PF3D7_0309300.1	578	588	3	578, 583, 585	11	No
PF3D7_0309300.1	597	611	3	602, 603, 606	15	No
PF3D7_0309300.1	666	692	6	671, 673, 676, 683, 686, 687	27	No
PF3D7_0309500.1	360	377	5	365, 366, 369, 372, 377	18	No
PF3D7_0309500.1	553	569	4	558, 562, 563, 564	17	No
PF3D7_0310200.1	1	23	6	6, 9, 10, 16, 17, 18	23	No
PF3D7_0310200.1	325	349	7	330, 333, 335, 338, 339, 344, 347	25	No
PF3D7_0310200.1	579	589	3	580, 584, 587	11	No
PF3D7_0310200.1	725	742	6	730, 732, 734, 735, 737, 741	18	No
PF3D7_0310200.1	744	758	3	749, 751, 753	15	No
PF3D7_0310200.1	844	865	6	849, 851, 852, 856, 858, 860	22	No
PF3D7_0310200.1	886	900	3	891, 892, 895	15	No
PF3D7_0310200.1	1060	1076	5	1062, 1065, 1068, 1071, 1075	17	No
PF3D7_0310200.1	1177	1189	3	1182, 1183, 1184	13	No
PF3D7_0310200.1	1289	1304	3	1294, 1297, 1299	16	No
PF3D7_0310200.1	1319	1329	3	1321, 1324, 1327	11	No
PF3D7_0310200.1	1357	1376	5	1362, 1363, 1367, 1368, 1371	20	No
PF3D7_0310200.1	1478	1492	3	1483, 1484, 1487	15	No
PF3D7_0310200.1	1553	1566	3	1558, 1559, 1561	14	No
PF3D7_0310200.1	1572	1600	11	1574, 1577, 1580, 1581, 1584, 1585, 1591, 1592, 1593, 1595, 1600	29	No
PF3D7_0310200.1	1617	1630	4	1617, 1622, 1623, 1625	14	No
PF3D7_0310200.1	1674	1744	25	1677, 1679, 1683, 1685, 1686, 1688, 1692, 1694, 1696, 1697, 1701, 1703, 1706, 1710, 1712, 1713, 1716, 1719, 1721, 1722, 1724, 1733, 1735, 1738, 1739	71	No
PF3D7_0310200.1	1789	1801	4	1789, 1794, 1795, 1796	13	No
PF3D7_0310200.1	1833	1853	8	1835, 1838, 1842, 1844, 1845, 1846, 1848, 1853	21	Yes
PF3D7_0310200.1	1881	1898	4	1886, 1889, 1890, 1893	18	No
PF3D7_0310200.1	1979	1994	4	1984, 1985, 1989, 1993	16	No
PF3D7_0310200.1	2044	2054	3	2047, 2049, 2054	11	No
PF3D7_0310200.1	2156	2169	4	2156, 2161, 2163, 2164	14	No
PF3D7_0310200.1	2280	2295	3	2285, 2287, 2290	16	No
PF3D7_0310200.1	2470	2485	4	2475, 2476, 2477, 2480	16	No
PF3D7_0310200.1	2779	2800	6	2783, 2784, 2789, 2792, 2794, 2795	22	No
PF3D7_0310200.1	3116	3131	3	3121, 3125, 3126	16	No
PF3D7_0310200.1	3170	3190	6	3175, 3177, 3179, 3180, 3184, 3185	21	No
PF3D7_0310200.1	3365	3375	3	3365, 3370, 3374	11	No
PF3D7_0310200.1	3497	3512	4	3502, 3505, 3507, 3511	16	No
PF3D7_0310200.1	3975	3987	3	3980, 3981, 3982	13	No
PF3D7_0310200.1	4118	4151	10	4123, 4124, 4125, 4126, 4134, 4135, 4140, 4142, 4145, 4146	34	No
PF3D7_0310200.1	4185	4213	6	4190, 4194, 4195, 4203, 4207, 4208	29	No
PF3D7_0310300.1	38	55	4	43, 45, 46, 50	18	No
PF3D7_0310300.1	178	191	4	183, 184, 186, 191	14	No
PF3D7_0310300.1	292	305	3	297, 298, 300	14	No
PF3D7_0310300.1	354	377	7	359, 363, 364, 365, 369, 371, 372	24	No
PF3D7_0310300.1	464	474	3	467, 469, 474	11	No
PF3D7_0310300.1	690	703	3	695, 696, 698	14	No
PF3D7_0310300.1	787	801	3	792, 795, 796	15	No
PF3D7_0310300.1	878	888	3	880, 883, 888	11	No
PF3D7_0310300.1	908	923	5	913, 914, 916, 917, 918	16	No
PF3D7_0310300.1	992	1002	3	992, 997, 998	11	No
PF3D7_0310500.1	8	22	3	13, 15, 17	15	No
PF3D7_0310500.1	47	57	3	48, 52, 54	11	No
PF3D7_0310500.1	95	110	4	99, 100, 105, 106	16	No
PF3D7_0310500.1	126	140	4	129, 131, 135, 137	15	No
PF3D7_0310500.1	188	204	4	193, 196, 198, 199	17	No
PF3D7_0310500.1	212	227	4	217, 219, 222, 226	16	No
PF3D7_0310500.1	246	277	10	251, 253, 254, 255, 257, 261, 266, 270, 271, 272	32	No
PF3D7_0310500.1	315	334	5	316, 320, 325, 329, 331	20	No
PF3D7_0310500.1	355	365	3	355, 360, 363	11	No
PF3D7_0310500.1	492	506	3	497, 499, 501	15	No
PF3D7_0310500.1	516	532	4	521, 523, 526, 527	17	No
PF3D7_0310500.1	575	590	4	577, 580, 583, 585	16	No
PF3D7_0310500.1	694	708	3	699, 701, 703	15	No
PF3D7_0310500.1	855	865	3	857, 860, 864	11	No
PF3D7_0310500.1	1094	1104	3	1097, 1099, 1103	11	No
PF3D7_0310500.1	1111	1124	3	1116, 1117, 1119	14	No
PF3D7_0310500.1	1491	1505	3	1496, 1499, 1500	15	No
PF3D7_0310500.1	1509	1524	3	1514, 1515, 1519	16	No
PF3D7_0310500.1	1755	1765	3	1757, 1760, 1763	11	No
PF3D7_0310500.1	1812	1827	5	1812, 1817, 1818, 1819, 1822	16	No
PF3D7_0310500.1	1855	1873	5	1855, 1860, 1864, 1868, 1872	19	No
PF3D7_0310500.1	1982	1996	4	1982, 1987, 1989, 1991	15	No
PF3D7_0310500.1	2005	2015	3	2007, 2010, 2014	11	No
PF3D7_0310500.1	2216	2231	4	2217, 2221, 2224, 2226	16	No
PF3D7_0310600.1	149	159	3	150, 154, 156	11	No
PF3D7_0310900.1	156	166	3	160, 161, 166	11	No
PF3D7_0310900.1	359	374	3	364, 365, 369	16	No
PF3D7_0310900.1	401	411	3	404, 406, 410	11	No
PF3D7_0310900.1	453	468	3	458, 459, 463	16	No
PF3D7_0310900.1	511	527	4	516, 517, 519, 522	17	No
PF3D7_0310900.1	591	609	6	596, 600, 601, 602, 603, 604	19	No
PF3D7_0310900.1	613	629	4	618, 619, 623, 624	17	No
PF3D7_0310900.1	651	661	3	651, 656, 660	11	No
PF3D7_0310900.1	661	679	4	666, 670, 671, 674	19	No
PF3D7_0310900.1	684	708	6	689, 691, 692, 700, 702, 703	25	No
PF3D7_0310900.1	727	753	9	732, 735, 736, 739, 742, 743, 745, 748, 751	27	No
PF3D7_0310900.1	759	777	5	764, 766, 768, 769, 772	19	No
PF3D7_0311100.1	69	79	3	71, 74, 79	11	No
PF3D7_0311100.1	198	216	5	203, 205, 208, 210, 211	19	No
PF3D7_0311100.1	216	237	6	221, 222, 226, 228, 232, 236	22	No
PF3D7_0311100.1	244	290	16	246, 249, 254, 259, 264, 265, 266, 267, 268, 272, 277, 279, 280, 281, 284, 285	47	No
PF3D7_0311100.1	298	321	9	303, 304, 305, 308, 309, 311, 312, 314, 316	24	No
PF3D7_0311100.1	397	419	6	401, 402, 407, 410, 413, 414	23	No
PF3D7_0311100.1	428	541	49	433, 434, 435, 436, 438, 440, 442, 443, 445, 446, 450, 451, 454, 458, 459, 462, 463, 466, 467, 470, 474, 475, 478, 479, 482, 483, 486, 487, 490, 491, 494, 495, 498, 499, 502, 506, 507, 510, 514, 515, 518, 519, 520, 522, 526, 528, 533, 535, 536	114	No
PF3D7_0311100.1	552	567	4	557, 558, 560, 562	16	No
PF3D7_0311100.1	573	600	10	578, 579, 581, 582, 590, 591, 592, 594, 595, 597	28	No
PF3D7_0311300.1	272	286	4	274, 277, 281, 283	15	No
PF3D7_0311300.1	313	328	4	314, 318, 323, 328	16	Yes
PF3D7_0311300.1	530	548	5	534, 535, 540, 543, 546	19	No
PF3D7_0311300.1	554	564	3	556, 559, 564	11	No
PF3D7_0311300.1	572	608	12	577, 580, 581, 582, 584, 585, 587, 592, 597, 598, 602, 603	37	No
PF3D7_0311300.1	664	679	4	665, 669, 671, 674	16	No
PF3D7_0311300.1	739	759	6	740, 744, 747, 750, 754, 757	21	No
PF3D7_0311300.1	759	772	3	764, 765, 767	14	No
PF3D7_0311300.1	853	884	9	855, 858, 863, 865, 870, 873, 875, 877, 879	32	No
PF3D7_0311400.1	866	880	3	871, 872, 875	15	No
PF3D7_0312100.1	23	37	4	23, 28, 32, 34	15	No
PF3D7_0312100.1	57	67	3	59, 62, 65	11	No
PF3D7_0312100.1	82	92	3	84, 87, 90	11	No
PF3D7_0312100.1	303	317	3	308, 310, 312	15	No
PF3D7_0312100.1	394	407	3	399, 400, 402	14	No
PF3D7_0312100.1	413	429	4	418, 422, 423, 424	17	No
PF3D7_0312400.1	34	51	5	39, 40, 42, 43, 46	18	No
PF3D7_0312400.1	57	72	3	62, 66, 67	16	No
PF3D7_0312400.1	221	237	4	226, 228, 229, 232	17	No
PF3D7_0312400.1	422	435	4	423, 427, 430, 434	14	No
PF3D7_0312500.1	76	91	3	81, 83, 86	16	No
PF3D7_0312500.1	288	302	3	293, 294, 297	15	No
PF3D7_0312500.1	424	439	3	429, 430, 434	16	No
PF3D7_0312500.1	569	579	4	570, 574, 577, 578	11	No
PF3D7_0313000.1	88	103	5	89, 93, 96, 97, 98	16	No
PF3D7_0313000.1	142	159	5	147, 148, 152, 153, 154	18	No
PF3D7_0313000.1	175	185	3	175, 180, 184	11	No
PF3D7_0313000.1	207	229	6	212, 214, 217, 219, 224, 225	23	No
PF3D7_0313000.1	327	342	4	331, 332, 337, 340	16	No
PF3D7_0313500.1	13	23	3	14, 18, 23	11	No
PF3D7_0314700.1	121	138	6	126, 128, 129, 130, 131, 133	18	No
PF3D7_0314700.1	148	167	5	153, 155, 158, 162, 167	20	No
PF3D7_0314700.1	174	201	9	179, 182, 183, 184, 185, 186, 193, 194, 196	28	No
PF3D7_0314700.1	215	232	5	220, 222, 223, 227, 229	18	No
PF3D7_0314700.1	259	283	10	264, 266, 267, 269, 270, 271, 272, 276, 278, 283	25	No
PF3D7_0314700.1	306	329	7	306, 311, 313, 314, 319, 322, 324	24	No
PF3D7_0314700.1	343	376	10	344, 348, 352, 357, 358, 360, 365, 366, 371, 372	34	No
PF3D7_0314700.1	393	406	3	398, 400, 401	14	No
PF3D7_0314700.1	454	464	3	455, 459, 462	11	No
PF3D7_0314700.1	464	478	3	469, 470, 473	15	No
PF3D7_0314700.1	575	592	4	580, 584, 585, 587	18	No
PF3D7_0314700.1	599	633	9	604, 608, 609, 611, 613, 616, 624, 626, 628	35	No
PF3D7_0314700.1	674	693	5	674, 679, 683, 686, 688	20	No
PF3D7_0314700.1	716	734	5	716, 721, 726, 727, 729	19	No
PF3D7_0314700.1	763	773	3	767, 768, 773	11	No
PF3D7_0314700.1	822	853	8	827, 830, 831, 835, 839, 843, 848, 851	32	No
PF3D7_0314700.1	858	868	3	858, 863, 864	11	No
PF3D7_0314700.1	868	882	3	873, 876, 877	15	No
PF3D7_0314700.1	940	955	4	942, 945, 950, 952	16	No
PF3D7_0314700.1	997	1032	13	1000, 1002, 1006, 1008, 1012, 1014, 1015, 1018, 1020, 1024, 1026, 1027, 1032	36	No
PF3D7_0314700.1	1066	1084	5	1066, 1071, 1075, 1078, 1079	19	No
PF3D7_0314700.1	1118	1140	6	1118, 1123, 1126, 1131, 1134, 1135	23	Yes
PF3D7_0315600.1	12	22	3	13, 17, 19	11	No
PF3D7_0315600.1	38	53	3	43, 44, 48	16	No
PF3D7_0315600.1	79	96	5	80, 84, 87, 89, 91	18	Yes
PF3D7_0315600.1	157	171	3	162, 164, 166	15	Yes
PF3D7_0315600.1	208	222	3	213, 214, 217	15	No
PF3D7_0315600.1	313	341	7	314, 318, 323, 327, 332, 336, 341	29	No
PF3D7_0315800.1	26	41	4	27, 31, 33, 36	16	No
PF3D7_0315800.1	173	189	4	178, 180, 183, 184	17	No
PF3D7_0315800.1	285	297	3	290, 291, 292	13	No
PF3D7_0315800.1	313	330	5	318, 320, 322, 325, 328	18	No
PF3D7_0316200.1	103	120	5	108, 109, 110, 115, 116	18	No
PF3D7_0316200.1	131	141	3	132, 136, 139	11	No
PF3D7_0316200.1	434	446	3	439, 440, 441	13	No
PF3D7_0316200.1	531	546	3	536, 537, 541	16	No
PF3D7_0316200.1	925	942	4	930, 932, 934, 937	18	No
PF3D7_0316200.1	963	973	3	964, 968, 970	11	No
PF3D7_0316200.1	1050	1069	5	1055, 1057, 1059, 1063, 1064	20	No
PF3D7_0316200.1	1168	1182	4	1173, 1175, 1176, 1177	15	No
PF3D7_0316200.1	1423	1433	3	1427, 1428, 1433	11	No
PF3D7_0316200.1	1737	1752	4	1739, 1742, 1745, 1747	16	No
PF3D7_0316200.1	1862	1872	3	1862, 1867, 1868	11	No
PF3D7_0316200.1	1948	1963	3	1953, 1957, 1958	16	Yes
PF3D7_0316200.1	2105	2137	12	2110, 2111, 2115, 2121, 2123, 2125, 2126, 2128, 2129, 2131, 2132, 2137	33	No
PF3D7_0316200.1	2274	2289	3	2279, 2282, 2284	16	No
PF3D7_0316300.1	16	26	3	19, 21, 26	11	No
PF3D7_0316300.1	248	265	5	248, 253, 255, 260, 261	18	No
PF3D7_0316300.1	358	376	6	363, 364, 365, 367, 369, 371	19	No
PF3D7_0316300.2	3	17	3	8, 10, 12	15	No
PF3D7_0316500.1	30	40	3	34, 35, 40	11	No
PF3D7_0316500.1	64	83	5	68, 69, 74, 75, 78	20	No
PF3D7_0316500.1	217	227	3	218, 222, 225	11	No
PF3D7_0316500.1	236	249	3	241, 242, 244	14	No
PF3D7_0316500.1	331	345	4	331, 336, 338, 340	15	No
PF3D7_0316500.1	433	451	4	438, 441, 443, 446	19	No
PF3D7_0316600.1	9	24	3	14, 17, 19	16	Yes
PF3D7_0316600.1	147	157	3	150, 152, 156	11	No
PF3D7_0316700.1	13	32	5	18, 19, 22, 27, 28	20	No
PF3D7_0316800.1	5	15	3	5, 10, 13	11	Yes
PF3D7_0316800.1	86	101	3	91, 92, 96	16	No
PF3D7_0316900.1	220	240	6	222, 225, 230, 231, 234, 235	21	No
PF3D7_0316900.1	306	325	5	308, 311, 315, 316, 320	20	No
PF3D7_0316900.1	374	388	4	379, 380, 383, 386	15	No
PF3D7_0316900.1	418	432	3	423, 426, 427	15	No
PF3D7_0316900.1	489	506	5	494, 495, 496, 498, 501	18	No
PF3D7_0317000.1	43	55	3	48, 49, 50	13	No
PF3D7_0317200.1	57	69	3	62, 63, 64	13	No
PF3D7_0317200.1	87	107	7	92, 93, 94, 97, 98, 101, 102	21	No
PF3D7_0317200.1	117	137	7	122, 125, 127, 128, 129, 131, 132	21	No
PF3D7_0317200.1	138	151	4	140, 143, 146, 149	14	No
PF3D7_0317200.1	165	182	6	170, 171, 172, 174, 177, 181	18	No
PF3D7_0317200.1	201	211	3	204, 206, 210	11	No
PF3D7_0317200.1	227	237	3	227, 232, 235	11	No
PF3D7_0317200.1	264	278	4	269, 270, 273, 276	15	No
PF3D7_0317200.1	323	337	3	328, 330, 332	15	No
PF3D7_0317200.1	370	384	3	375, 377, 379	15	No
PF3D7_0317200.1	490	514	9	495, 496, 499, 501, 505, 506, 508, 509, 514	25	No
PF3D7_0317200.1	558	571	3	563, 565, 566	14	No
PF3D7_0317200.1	578	595	5	578, 583, 585, 590, 591	18	No
PF3D7_0317200.1	625	639	3	630, 632, 634	15	No
PF3D7_0317200.1	807	821	4	810, 812, 816, 818	15	No
PF3D7_0317200.1	952	962	3	956, 957, 962	11	No
PF3D7_0317200.1	976	986	3	977, 981, 984	11	No
PF3D7_0317200.1	991	1007	4	996, 997, 999, 1002	17	No
PF3D7_0317200.1	1038	1050	3	1043, 1044, 1045	13	No
PF3D7_0317200.1	1094	1109	4	1095, 1099, 1102, 1104	16	No
PF3D7_0317200.1	1191	1207	5	1196, 1198, 1200, 1201, 1202	17	Yes
PF3D7_0317300.1	65	75	3	65, 70, 73	11	No
PF3D7_0317300.1	97	112	4	98, 102, 107, 110	16	No
PF3D7_0317300.1	536	573	12	541, 542, 545, 546, 549, 555, 558, 560, 563, 565, 568, 573	38	No
PF3D7_0317300.1	588	602	3	593, 596, 597	15	No
PF3D7_0317300.1	744	764	5	749, 750, 754, 755, 759	21	No
PF3D7_0317300.1	775	790	3	780, 781, 785	16	No
PF3D7_0317300.1	914	928	3	919, 922, 923	15	No
PF3D7_0317300.1	1013	1027	3	1018, 1020, 1022	15	No
PF3D7_0317300.1	1428	1451	6	1433, 1434, 1436, 1442, 1443, 1446	24	No
PF3D7_0317300.1	2274	2293	5	2276, 2279, 2284, 2288, 2290	20	No
PF3D7_0317300.1	2810	2825	3	2815, 2818, 2820	16	No
PF3D7_0317300.1	2835	2851	4	2840, 2843, 2844, 2846	17	No
PF3D7_0317300.1	2934	2952	5	2939, 2943, 2944, 2947, 2951	19	No
PF3D7_0317300.1	2971	2997	7	2976, 2978, 2980, 2983, 2988, 2992, 2994	27	No
PF3D7_0317300.1	3047	3057	3	3051, 3052, 3057	11	No
PF3D7_0317300.1	3119	3138	5	3124, 3127, 3129, 3132, 3133	20	No
PF3D7_0317300.1	3292	3314	7	3297, 3301, 3302, 3303, 3304, 3307, 3309	23	No
PF3D7_0317300.1	3321	3335	3	3326, 3329, 3330	15	No
PF3D7_0317400.1	38	56	6	38, 43, 45, 47, 51, 53	19	No
PF3D7_0317400.1	179	189	3	179, 184, 185	11	No
PF3D7_0317500.1	52	70	4	57, 61, 62, 65	19	No
PF3D7_0317500.1	130	146	5	132, 135, 138, 139, 141	17	No
PF3D7_0317500.1	289	301	3	294, 295, 296	13	No
PF3D7_0317500.1	303	313	3	305, 308, 312	11	No
PF3D7_0317500.1	339	368	9	344, 347, 349, 353, 354, 356, 358, 361, 363	30	No
PF3D7_0317500.1	391	405	4	396, 397, 398, 400	15	No
PF3D7_0317500.1	453	468	4	458, 460, 462, 463	16	No
PF3D7_0317500.1	714	728	4	715, 719, 721, 723	15	No
PF3D7_0317500.1	1018	1028	3	1021, 1023, 1028	11	No
PF3D7_0317500.1	1069	1084	4	1073, 1074, 1079, 1080	16	No
PF3D7_0317500.1	1194	1208	5	1199, 1200, 1201, 1202, 1203	15	No
PF3D7_0317500.1	1236	1246	3	1236, 1241, 1242	11	No
PF3D7_0317500.1	1442	1457	4	1447, 1448, 1450, 1452	16	No
PF3D7_0317500.1	1526	1543	5	1527, 1531, 1533, 1534, 1538	18	No
PF3D7_0317600.1	28	42	3	33, 34, 37	15	No
PF3D7_0317700.1	10	27	5	15, 18, 19, 21, 22	18	Yes
PF3D7_0317700.1	46	60	3	51, 54, 55	15	No
PF3D7_0317700.1	227	277	14	228, 232, 237, 239, 244, 246, 251, 253, 258, 260, 265, 267, 272, 274	51	No
PF3D7_0317700.1	400	415	4	400, 405, 410, 414	16	No
PF3D7_0317700.1	506	529	7	506, 511, 513, 514, 520, 522, 524	24	No
PF3D7_0317700.1	800	813	3	805, 806, 808	14	No
PF3D7_0317700.1	1050	1065	4	1051, 1055, 1058, 1060	16	No
PF3D7_0317700.1	1237	1250	3	1242, 1243, 1245	14	No
PF3D7_0317700.1	1543	1590	19	1548, 1549, 1550, 1552, 1555, 1557, 1558, 1561, 1564, 1567, 1569, 1570, 1572, 1573, 1575, 1576, 1583, 1585, 1590	48	No
PF3D7_0317700.1	1896	1922	8	1901, 1905, 1906, 1911, 1913, 1914, 1917, 1920	27	No
PF3D7_0317700.1	1994	2018	8	1999, 2002, 2003, 2005, 2007, 2008, 2013, 2017	25	No
PF3D7_0317700.1	2049	2068	5	2054, 2056, 2058, 2061, 2063	20	No
PF3D7_0317700.1	2076	2097	6	2081, 2082, 2084, 2090, 2091, 2092	22	No
PF3D7_0317700.1	2147	2167	8	2152, 2154, 2155, 2156, 2158, 2159, 2160, 2162	21	No
PF3D7_0317700.1	2272	2300	7	2277, 2280, 2282, 2285, 2290, 2294, 2295	29	No
PF3D7_0317700.1	2531	2549	5	2533, 2536, 2540, 2541, 2544	19	No
PF3D7_0317700.1	2624	2639	4	2629, 2631, 2633, 2634	16	No
PF3D7_0317700.1	2710	2726	4	2715, 2718, 2719, 2721	17	No
PF3D7_0317700.1	2756	2772	4	2761, 2762, 2765, 2767	17	No
PF3D7_0318200.1	281	296	4	283, 286, 291, 296	16	No
PF3D7_0318200.1	343	356	3	348, 349, 351	14	No
PF3D7_0318200.1	522	537	3	527, 530, 532	16	No
PF3D7_0318200.1	641	662	6	646, 647, 651, 652, 657, 661	22	No
PF3D7_0318200.1	670	683	3	675, 676, 678	14	No
PF3D7_0318200.1	738	752	5	743, 744, 745, 746, 747	15	No
PF3D7_0318200.1	772	789	5	777, 780, 781, 782, 784	18	No
PF3D7_0318200.1	814	828	4	819, 821, 823, 828	15	No
PF3D7_0318200.1	837	852	3	842, 844, 847	16	No
PF3D7_0318200.1	860	877	4	865, 867, 869, 872	18	No
PF3D7_0318200.1	900	910	3	901, 905, 907	11	No
PF3D7_0318200.1	947	970	7	948, 952, 957, 959, 960, 962, 965	24	No
PF3D7_0318200.1	1006	1021	4	1008, 1011, 1015, 1016	16	No
PF3D7_0318200.1	1070	1085	4	1075, 1078, 1079, 1080	16	No
PF3D7_0318200.1	1134	1149	3	1139, 1143, 1144	16	No
PF3D7_0318200.1	1163	1175	3	1168, 1169, 1170	13	No
PF3D7_0318200.1	1335	1350	3	1340, 1343, 1345	16	No
PF3D7_0318200.1	1367	1377	3	1370, 1372, 1376	11	No
PF3D7_0318200.1	1560	1575	3	1565, 1566, 1570	16	No
PF3D7_0318200.1	1617	1631	4	1619, 1622, 1625, 1626	15	No
PF3D7_0318200.1	1644	1670	7	1649, 1650, 1654, 1659, 1661, 1664, 1665	27	No
PF3D7_0318200.1	1670	1684	3	1675, 1676, 1679	15	No
PF3D7_0318200.1	1715	1728	3	1720, 1722, 1723	14	No
PF3D7_0318200.1	1792	1808	5	1792, 1797, 1800, 1802, 1803	17	No
PF3D7_0318200.1	1831	1843	3	1836, 1837, 1838	13	No
PF3D7_0318200.1	1857	1867	3	1858, 1862, 1865	11	No
PF3D7_0318200.1	1885	1906	6	1887, 1890, 1895, 1898, 1899, 1901	22	No
PF3D7_0318200.1	2067	2083	5	2067, 2072, 2073, 2077, 2078	17	No
PF3D7_0318200.1	2137	2150	3	2142, 2144, 2145	14	No
PF3D7_0318200.1	2156	2180	8	2161, 2163, 2165, 2168, 2170, 2171, 2175, 2178	25	No
PF3D7_0318200.1	2216	2231	3	2221, 2225, 2226	16	No
PF3D7_0318200.1	2240	2272	13	2245, 2246, 2248, 2249, 2250, 2252, 2253, 2255, 2256, 2263, 2264, 2266, 2267	33	No
PF3D7_0318200.1	2280	2395	58	2281, 2285, 2288, 2289, 2291, 2292, 2295, 2296, 2298, 2299, 2302, 2303, 2305, 2306, 2309, 2310, 2312, 2313, 2316, 2317, 2319, 2320, 2323, 2324, 2326, 2327, 2330, 2331, 2333, 2334, 2337, 2338, 2340, 2341, 2344, 2345, 2347, 2348, 2351, 2352, 2354, 2355, 2363, 2366, 2367, 2369, 2370, 2372, 2373, 2377, 2379, 2380, 2383, 2384, 2386, 2387, 2390, 2393	116	No
PF3D7_0318200.1	2401	2411	3	2403, 2406, 2410	11	No
PF3D7_0318500.1	182	204	6	187, 189, 190, 197, 198, 199	23	No
PF3D7_0318500.1	323	340	5	327, 328, 333, 334, 335	18	No
PF3D7_0318500.1	443	473	10	448, 452, 453, 456, 458, 459, 461, 464, 465, 468	31	No
PF3D7_0318500.1	484	498	4	487, 489, 493, 498	15	No
PF3D7_0318500.1	503	520	4	508, 512, 513, 515	18	No
PF3D7_0318500.1	527	542	3	532, 536, 537	16	No
PF3D7_0318500.1	579	594	4	584, 587, 589, 593	16	No
PF3D7_0318500.1	846	856	3	848, 851, 854	11	No
PF3D7_0318500.1	969	987	5	974, 976, 977, 979, 982	19	No
PF3D7_0318500.1	1114	1134	6	1119, 1122, 1124, 1126, 1128, 1129	21	Yes
PF3D7_0318500.1	1354	1380	7	1359, 1361, 1363, 1369, 1370, 1374, 1375	27	No
PF3D7_0318500.1	1757	1777	5	1762, 1763, 1767, 1771, 1772	21	No
PF3D7_0318500.1	1895	1905	3	1896, 1900, 1904	11	Yes
PF3D7_0318500.1	1992	2012	6	1997, 1998, 2002, 2004, 2006, 2007	21	No
PF3D7_0318500.1	2068	2083	3	2073, 2075, 2078	16	No
PF3D7_0318500.1	2083	2101	5	2088, 2092, 2093, 2094, 2096	19	No
PF3D7_0318500.1	2122	2139	4	2127, 2130, 2132, 2134	18	No
PF3D7_0318500.1	2178	2197	6	2178, 2183, 2187, 2188, 2192, 2197	20	No
PF3D7_0318500.1	2302	2317	4	2307, 2308, 2312, 2315	16	No
PF3D7_0318500.1	2352	2362	3	2352, 2357, 2359	11	No
PF3D7_0318500.1	2481	2494	3	2486, 2488, 2489	14	No
PF3D7_0318500.1	2692	2718	7	2694, 2697, 2701, 2702, 2711, 2712, 2713	27	No
PF3D7_0318500.1	2805	2820	3	2810, 2811, 2815	16	No
PF3D7_0318500.1	2852	2868	4	2857, 2860, 2861, 2863	17	No
PF3D7_0318500.1	2870	2887	5	2875, 2878, 2879, 2881, 2882	18	No
PF3D7_0318500.1	2911	2929	5	2916, 2919, 2921, 2924, 2929	19	No
PF3D7_0318500.1	2952	2980	9	2957, 2960, 2962, 2963, 2968, 2969, 2974, 2975, 2980	29	No
PF3D7_0318500.1	3107	3122	4	3111, 3112, 3117, 3121	16	No
PF3D7_0318500.1	3131	3145	4	3131, 3136, 3139, 3140	15	No
PF3D7_0318500.1	3205	3219	3	3210, 3213, 3214	15	No
PF3D7_0318500.1	3280	3295	4	3284, 3285, 3290, 3291	16	No
PF3D7_0318500.1	4006	4020	4	4011, 4012, 4013, 4015	15	No
PF3D7_0318500.1	4226	4243	5	4227, 4231, 4233, 4238, 4241	18	No
PF3D7_0318500.1	4263	4277	4	4263, 4268, 4271, 4272	15	No
PF3D7_0318500.1	4463	4503	13	4463, 4468, 4470, 4473, 4477, 4482, 4483, 4488, 4492, 4494, 4496, 4498, 4502	41	No
PF3D7_0318500.1	4557	4570	4	4558, 4562, 4565, 4570	14	No
PF3D7_0318500.1	4572	4593	6	4577, 4580, 4582, 4584, 4588, 4592	22	No
PF3D7_0318500.1	4650	4662	4	4650, 4655, 4656, 4657	13	No
PF3D7_0318500.1	4719	4740	6	4721, 4724, 4729, 4730, 4733, 4735	22	No
PF3D7_0318500.1	4883	4898	3	4888, 4890, 4893	16	No
PF3D7_0318500.1	4965	4981	5	4970, 4972, 4975, 4980, 4981	17	No
PF3D7_0318700.1	7	21	3	12, 14, 16	15	No
PF3D7_0318700.1	32	50	6	34, 37, 40, 41, 43, 45	19	No
PF3D7_0319000.1	209	223	3	214, 216, 218	15	No
PF3D7_0319000.1	377	392	4	382, 384, 386, 387	16	No
PF3D7_0319000.1	406	422	5	407, 411, 413, 417, 421	17	No
PF3D7_0319000.1	432	446	4	437, 438, 440, 441	15	No
PF3D7_0319000.1	521	534	4	526, 527, 529, 534	14	No
PF3D7_0319000.1	650	660	3	652, 655, 659	11	No
PF3D7_0319000.1	690	700	3	693, 695, 700	11	No
PF3D7_0319000.1	801	816	4	806, 809, 810, 811	16	No
PF3D7_0319000.1	938	952	3	943, 946, 947	15	No
PF3D7_0319000.1	1158	1168	3	1158, 1163, 1166	11	No
PF3D7_0319000.1	1312	1330	5	1312, 1317, 1321, 1324, 1325	19	No
PF3D7_0319000.1	1343	1360	4	1348, 1352, 1353, 1355	18	No
PF3D7_0319000.1	1463	1479	4	1468, 1469, 1472, 1474	17	No
PF3D7_0319000.1	1746	1760	3	1751, 1752, 1755	15	No
PF3D7_0319000.1	1811	1826	3	1816, 1817, 1821	16	No
PF3D7_0319200.1	83	100	5	86, 88, 93, 94, 95	18	No
PF3D7_0319200.1	178	192	4	179, 183, 185, 187	15	No
PF3D7_0319200.1	270	287	5	275, 276, 278, 282, 286	18	No
PF3D7_0319200.1	780	793	3	785, 787, 788	14	No
PF3D7_0319200.1	885	900	4	885, 890, 895, 899	16	No
PF3D7_0319500.1	74	89	3	79, 83, 84	16	No
PF3D7_0319500.1	237	253	4	242, 244, 245, 248	17	No
PF3D7_0319500.1	285	309	14	290, 291, 294, 295, 296, 298, 300, 301, 302, 303, 304, 305, 306, 307	25	No
PF3D7_0319700.1	228	241	3	233, 234, 236	14	No
PF3D7_0319700.1	378	393	4	382, 383, 388, 391	16	No
PF3D7_0319700.1	715	730	3	720, 721, 725	16	No
PF3D7_0319700.1	784	814	8	787, 789, 793, 795, 797, 804, 808, 809	31	No
PF3D7_0319700.1	814	829	4	816, 819, 822, 824	16	No
PF3D7_0319700.1	839	849	3	839, 844, 846	11	No
PF3D7_0319700.1	938	953	3	943, 945, 948	16	No
PF3D7_0319700.1	1051	1066	4	1053, 1056, 1060, 1061	16	No
PF3D7_0319700.1	1241	1255	3	1246, 1248, 1250	15	No
PF3D7_0319700.1	1279	1294	4	1284, 1285, 1288, 1289	16	No
PF3D7_0319700.1	1651	1664	3	1656, 1658, 1659	14	No
PF3D7_0319700.1	1885	1897	3	1890, 1891, 1892	13	No
PF3D7_0319700.1	1936	1951	3	1941, 1945, 1946	16	No
PF3D7_0319700.1	2222	2232	3	2222, 2227, 2232	11	No
PF3D7_0319700.1	2362	2377	3	2367, 2370, 2372	16	No
PF3D7_0319700.1	2657	2679	6	2658, 2662, 2666, 2670, 2674, 2678	23	No
PF3D7_0319700.1	2755	2772	6	2755, 2760, 2764, 2765, 2766, 2767	18	No
PF3D7_0319700.1	2779	2789	3	2779, 2784, 2787	11	No
PF3D7_0319700.1	2804	2814	3	2808, 2809, 2814	11	No
PF3D7_0319700.1	2816	2844	7	2821, 2824, 2826, 2828, 2834, 2835, 2839	29	No
PF3D7_0319700.1	3026	3039	4	3031, 3032, 3034, 3038	14	No
PF3D7_0320000.1	3	20	5	8, 10, 13, 15, 20	18	No
PF3D7_0320000.1	45	60	4	48, 50, 55, 57	16	No
PF3D7_0320000.1	132	142	3	132, 137, 142	11	No
PF3D7_0320100.1	16	32	4	21, 23, 25, 27	17	No
PF3D7_0320100.1	96	120	6	101, 104, 106, 110, 115, 116	25	No
PF3D7_0320100.1	146	156	3	146, 151, 152	11	No
PF3D7_0321000.1	47	62	4	52, 53, 56, 57	16	Yes
PF3D7_0321000.1	98	108	3	101, 103, 107	11	No
PF3D7_0321000.1	121	131	3	124, 126, 131	11	No
PF3D7_0321000.1	196	206	3	199, 201, 206	11	No
PF3D7_0321000.1	298	313	4	300, 303, 308, 309	16	No
PF3D7_0321000.1	470	492	7	475, 476, 478, 479, 487, 489, 491	23	No
PF3D7_0321100.1	17	44	10	22, 24, 27, 29, 30, 32, 35, 36, 37, 39	28	No
PF3D7_0321100.1	185	200	4	190, 192, 195, 198	16	No
PF3D7_0321100.1	277	289	3	282, 283, 284	13	No
PF3D7_0321100.1	356	371	3	361, 362, 366	16	No
PF3D7_0321100.1	396	406	3	397, 401, 406	11	No
PF3D7_0321100.1	538	553	4	539, 543, 548, 549	16	No
PF3D7_0321100.1	559	574	4	562, 564, 569, 574	16	Yes
PF3D7_0321100.1	690	704	4	695, 697, 699, 703	15	No
PF3D7_0321100.1	755	775	5	759, 760, 765, 770, 773	21	No
PF3D7_0321100.1	775	788	3	780, 782, 783	14	No
PF3D7_0321100.1	931	954	6	936, 940, 941, 944, 949, 950	24	No
PF3D7_0321100.1	1050	1069	5	1051, 1055, 1060, 1061, 1064	20	No
PF3D7_0321100.1	1249	1262	3	1254, 1255, 1257	14	No
PF3D7_0321100.1	1366	1380	3	1371, 1374, 1375	15	No
PF3D7_0321100.1	1485	1497	3	1490, 1491, 1492	13	No
PF3D7_0321100.1	1559	1574	5	1559, 1564, 1565, 1568, 1569	16	No
PF3D7_0321500.1	418	428	3	421, 423, 428	11	No
PF3D7_0321500.1	441	454	4	446, 447, 449, 454	14	No
PF3D7_0321500.1	455	481	8	460, 462, 465, 468, 470, 471, 472, 476	27	No
PF3D7_0321500.1	517	539	6	522, 524, 526, 532, 533, 534	23	No
PF3D7_0321600.1	88	109	6	92, 93, 98, 101, 104, 107	22	No
PF3D7_0321600.1	113	123	3	114, 118, 120	11	No
PF3D7_0321600.1	293	310	4	298, 300, 302, 305	18	No
PF3D7_0321600.1	692	706	3	697, 698, 701	15	No
PF3D7_0321600.1	724	735	4	729, 730, 731, 732	12	No
PF3D7_0321700.1	76	91	3	81, 82, 86	16	No
PF3D7_0321700.1	133	147	3	138, 140, 142	15	No
PF3D7_0321700.1	183	218	12	188, 190, 191, 193, 194, 195, 201, 203, 205, 209, 211, 213	36	No
PF3D7_0321700.1	227	254	6	232, 235, 237, 245, 248, 249	28	No
PF3D7_0321700.1	376	390	4	377, 381, 383, 385	15	No
PF3D7_0321700.1	427	440	3	432, 434, 435	14	No
PF3D7_0321700.1	528	541	3	533, 535, 536	14	No
PF3D7_0321700.1	661	679	5	666, 667, 670, 671, 674	19	No
PF3D7_0321700.1	787	797	3	788, 792, 797	11	No
PF3D7_0321700.1	826	841	3	831, 833, 836	16	No
PF3D7_0321700.1	857	872	4	858, 862, 867, 868	16	No
PF3D7_0321700.1	886	896	3	890, 891, 896	11	No
PF3D7_0321700.1	962	975	4	964, 967, 970, 973	14	No
PF3D7_0321700.1	987	999	3	992, 993, 994	13	No
PF3D7_0321700.1	1444	1460	4	1449, 1453, 1454, 1455	17	No
PF3D7_0321700.1	1796	1811	4	1801, 1802, 1804, 1806	16	No
PF3D7_0321800.1	97	112	4	99, 102, 107, 111	16	No
PF3D7_0321800.1	112	126	4	117, 118, 119, 121	15	No
PF3D7_0321800.1	143	156	3	148, 150, 151	14	No
PF3D7_0321800.1	364	382	4	369, 373, 374, 377	19	Yes
PF3D7_0321800.1	912	925	3	917, 919, 920	14	No
PF3D7_0321800.1	982	1003	8	987, 988, 989, 990, 991, 993, 998, 1001	22	No
PF3D7_0321800.1	1007	1021	3	1012, 1013, 1016	15	No
PF3D7_0321800.1	1176	1192	4	1181, 1184, 1186, 1187	17	No
PF3D7_0321800.1	1329	1346	4	1334, 1337, 1339, 1341	18	No
PF3D7_0321800.1	1353	1365	3	1358, 1359, 1360	13	No
PF3D7_0321800.1	1368	1381	3	1373, 1375, 1376	14	No
PF3D7_0321800.1	1390	1440	18	1394, 1395, 1400, 1401, 1406, 1407, 1411, 1412, 1413, 1418, 1419, 1424, 1425, 1429, 1430, 1431, 1435, 1440	51	No
PF3D7_0321800.1	1444	1457	3	1449, 1450, 1452	14	No
PF3D7_0321800.1	1487	1502	4	1492, 1495, 1496, 1497	16	No
PF3D7_0321800.1	1502	1534	14	1507, 1508, 1510, 1512, 1513, 1516, 1518, 1519, 1521, 1522, 1524, 1526, 1529, 1533	33	No
PF3D7_0321800.1	1556	1570	4	1559, 1561, 1565, 1568	15	No
PF3D7_0321800.1	1682	1696	4	1687, 1688, 1691, 1696	15	No
PF3D7_0321800.1	1795	1838	12	1800, 1801, 1805, 1811, 1812, 1814, 1817, 1820, 1822, 1831, 1832, 1833	44	No
PF3D7_0321800.1	1906	1927	7	1911, 1914, 1916, 1918, 1919, 1921, 1922	22	No
PF3D7_0321800.1	1927	1944	4	1932, 1935, 1936, 1939	18	No
PF3D7_0321800.1	1980	1994	3	1985, 1988, 1989	15	No
PF3D7_0321800.1	2509	2546	12	2509, 2514, 2515, 2519, 2525, 2528, 2529, 2532, 2533, 2536, 2539, 2541	38	No
PF3D7_0321800.1	2546	2566	5	2551, 2552, 2556, 2557, 2561	21	No
PF3D7_0321800.1	2597	2611	3	2602, 2603, 2606	15	No
PF3D7_0321800.1	2618	2635	4	2623, 2627, 2628, 2630	18	No
PF3D7_0321800.1	2684	2703	6	2686, 2689, 2693, 2695, 2697, 2698	20	No
PF3D7_0321900.1	20	35	3	25, 27, 30	16	No
PF3D7_0321900.1	178	205	7	183, 185, 187, 192, 196, 200, 204	28	No
PF3D7_0321900.1	218	228	3	219, 223, 225	11	No
PF3D7_0321900.1	300	319	4	305, 309, 310, 314	20	No
PF3D7_0321900.1	462	475	3	467, 468, 470	14	No
PF3D7_0321900.1	727	740	4	727, 732, 735, 740	14	No
PF3D7_0321900.1	781	791	3	782, 786, 790	11	No
PF3D7_0321900.1	867	885	4	872, 876, 877, 880	19	No
PF3D7_0321900.1	978	991	3	983, 985, 986	14	No
PF3D7_0322000.1	75	96	6	75, 80, 84, 86, 89, 91	22	No
PF3D7_0322000.1	153	167	4	156, 158, 162, 166	15	No
PF3D7_0322100.1	133	149	5	134, 138, 141, 143, 144	17	No
PF3D7_0322100.1	202	212	3	205, 207, 212	11	No
PF3D7_0322100.1	264	276	3	269, 270, 271	13	No
PF3D7_0322100.1	297	315	5	298, 302, 305, 307, 310	19	No
PF3D7_0322100.1	423	436	3	428, 430, 431	14	No
PF3D7_0322400.1	1	10	4	2, 3, 4, 5	10	Yes
PF3D7_0322400.1	405	418	5	410, 411, 412, 413, 418	14	No
PF3D7_0322900.1	145	163	5	150, 152, 153, 158, 159	19	No
PF3D7_0322900.1	248	258	3	249, 253, 257	11	No
PF3D7_0323100.1	38	53	3	43, 45, 48	16	No
PF3D7_0323100.1	57	70	3	62, 63, 65	14	No
PF3D7_0323100.1	108	123	3	113, 117, 118	16	No
PF3D7_0323100.1	181	194	4	182, 186, 188, 189	14	No
PF3D7_0323100.1	280	352	35	285, 286, 288, 289, 292, 294, 295, 297, 298, 299, 303, 306, 309, 311, 314, 317, 318, 320, 321, 323, 325, 326, 327, 328, 331, 332, 333, 334, 336, 339, 340, 341, 344, 347, 350	73	No
PF3D7_0323100.1	392	407	3	397, 401, 402	16	No
PF3D7_0323100.1	408	422	3	413, 416, 417	15	No
PF3D7_0323100.1	665	677	3	670, 671, 672	13	No
PF3D7_0323100.1	736	753	4	741, 744, 746, 748	18	No
PF3D7_0323100.1	918	928	3	918, 923, 927	11	No
PF3D7_0323100.1	930	945	3	935, 936, 940	16	No
PF3D7_0323100.1	1146	1156	3	1147, 1151, 1154	11	No
PF3D7_0323100.1	1204	1230	6	1209, 1211, 1212, 1221, 1223, 1225	27	No
PF3D7_0323100.1	1285	1295	3	1285, 1290, 1291	11	Yes
PF3D7_0323100.1	1413	1431	5	1418, 1419, 1421, 1426, 1427	19	No
PF3D7_0323100.1	1437	1449	3	1442, 1443, 1444	13	No
PF3D7_0323500.1	261	271	3	263, 266, 271	11	No
PF3D7_0323700.1	46	61	3	51, 52, 56	16	No
PF3D7_0323700.1	76	91	3	81, 83, 86	16	No
PF3D7_0323700.1	210	222	3	215, 216, 217	13	No
PF3D7_0323700.1	248	263	4	252, 253, 258, 260	16	No
PF3D7_0323700.1	326	342	5	331, 333, 334, 337, 340	17	No
PF3D7_0323700.1	477	490	3	482, 484, 485	14	No
PF3D7_0323700.1	501	516	3	506, 510, 511	16	No
PF3D7_0323700.1	519	532	3	524, 526, 527	14	No
PF3D7_0323700.1	676	693	6	678, 681, 685, 686, 688, 690	18	No
PF3D7_0324800.1	31	41	3	31, 36, 37	11	No
PF3D7_0324800.1	43	58	3	48, 51, 53	16	No
PF3D7_0324800.1	113	127	4	115, 118, 122, 127	15	No
PF3D7_0324800.1	197	216	6	199, 202, 205, 206, 211, 212	20	No
PF3D7_0324800.1	263	278	4	268, 269, 272, 273	16	No
PF3D7_0324800.1	298	317	5	302, 303, 308, 309, 312	20	No
PF3D7_0400400.1	1	14	5	3, 5, 6, 7, 9	14	No
PF3D7_0400400.1	39	51	3	44, 45, 46	13	No
PF3D7_0400400.1	182	192	3	183, 187, 192	11	No
PF3D7_0400400.1	275	285	3	277, 280, 284	11	No
PF3D7_0400400.1	351	364	3	356, 357, 359	14	No
PF3D7_0400400.1	398	415	4	403, 406, 408, 410	18	No
PF3D7_0400400.1	689	702	4	691, 694, 697, 700	14	No
PF3D7_0400400.1	723	734	4	723, 728, 729, 734	12	No
PF3D7_0400400.1	796	812	5	801, 802, 803, 804, 807	17	No
PF3D7_0400400.1	823	837	3	828, 831, 832	15	No
PF3D7_0400400.1	1204	1214	3	1204, 1209, 1213	11	No
PF3D7_0400400.1	1393	1407	5	1398, 1399, 1400, 1401, 1402	15	No
PF3D7_0400400.1	1470	1485	4	1470, 1475, 1478, 1480	16	No
PF3D7_0400400.1	1578	1592	3	1583, 1585, 1587	15	No
PF3D7_0400400.1	1859	1879	6	1864, 1865, 1866, 1871, 1874, 1878	21	No
PF3D7_0400400.1	1916	1947	11	1917, 1921, 1923, 1925, 1928, 1932, 1934, 1937, 1938, 1942, 1945	32	No
PF3D7_0400400.1	1960	1970	3	1961, 1965, 1970	11	No
PF3D7_0400400.1	2047	2060	3	2052, 2054, 2055	14	No
PF3D7_0400400.1	2129	2147	7	2134, 2137, 2138, 2139, 2140, 2141, 2142	19	No
PF3D7_0400400.1	2157	2172	4	2159, 2162, 2165, 2167	16	No
PF3D7_0400400.1	2178	2221	14	2178, 2183, 2187, 2190, 2194, 2195, 2196, 2202, 2204, 2208, 2211, 2213, 2215, 2216	44	No
PF3D7_0400400.1	2313	2328	3	2318, 2320, 2323	16	No
PF3D7_0400400.1	2340	2360	6	2345, 2347, 2348, 2352, 2355, 2358	21	No
PF3D7_0400400.1	2374	2388	3	2379, 2382, 2383	15	No
PF3D7_0400400.1	2425	2441	5	2425, 2430, 2434, 2436, 2440	17	No
PF3D7_0400400.1	2561	2574	3	2566, 2567, 2569	14	No
PF3D7_0400400.1	2583	2593	3	2584, 2588, 2591	11	No
PF3D7_0400400.1	2603	2622	6	2608, 2612, 2613, 2614, 2617, 2620	20	No
PF3D7_0400400.1	2654	2668	3	2659, 2660, 2663	15	No
PF3D7_0400400.1	2679	2700	7	2684, 2687, 2688, 2690, 2694, 2695, 2700	22	No
PF3D7_0400400.1	2970	2992	6	2975, 2979, 2980, 2982, 2984, 2987	23	No
PF3D7_0400400.1	3003	3022	5	3008, 3011, 3012, 3017, 3018	20	No
PF3D7_0400400.1	3058	3080	8	3060, 3063, 3067, 3070, 3072, 3074, 3075, 3080	23	No
PF3D7_0400400.1	3093	3115	9	3094, 3098, 3100, 3101, 3104, 3105, 3106, 3108, 3110	23	No
PF3D7_0400400.1	3118	3128	3	3119, 3123, 3126	11	No
PF3D7_0400400.1	3134	3148	4	3137, 3139, 3143, 3145	15	No
PF3D7_0400400.1	3172	3200	6	3177, 3179, 3182, 3191, 3194, 3195	29	No
PF3D7_0400400.1	3245	3260	4	3248, 3250, 3254, 3255	16	No
PF3D7_0400400.1	3288	3311	6	3293, 3294, 3297, 3302, 3304, 3306	24	No
PF3D7_0400400.1	3354	3367	4	3355, 3359, 3362, 3365	14	No
PF3D7_0400400.1	3404	3419	4	3406, 3409, 3414, 3415	16	No
PF3D7_0400400.1	3445	3459	3	3450, 3451, 3454	15	No
PF3D7_0401800.1	52	307	149	57, 60, 61, 62, 64, 65, 68, 69, 70, 73, 75, 76, 78, 79, 80, 81, 82, 85, 87, 88, 90, 91, 93, 94, 97, 99, 100, 102, 103, 105, 106, 108, 109, 111, 112, 114, 115, 117, 118, 120, 121, 123, 124, 126, 129, 130, 131, 133, 135, 138, 139, 140, 142, 144, 147, 148, 149, 151, 153, 156, 157, 158, 160, 162, 163, 165, 166, 169, 171, 172, 174, 175, 177, 180, 183, 184, 185, 187, 189, 192, 193, 194, 196, 198, 201, …	256	No
PF3D7_0401800.1	365	382	5	370, 373, 375, 377, 381	18	No
PF3D7_0401800.1	445	460	4	448, 450, 455, 456	16	No
PF3D7_0401800.1	482	492	3	483, 487, 491	11	No
PF3D7_0402000.1	1	14	4	2, 6, 9, 14	14	Yes
PF3D7_0402000.1	51	61	3	53, 56, 59	11	No
PF3D7_0402000.1	83	93	3	85, 88, 91	11	No
PF3D7_0402000.1	133	156	6	138, 141, 143, 146, 151, 154	24	No
PF3D7_0402000.1	187	203	4	192, 195, 197, 198	17	No
PF3D7_0402000.1	297	311	3	302, 304, 306	15	No
PF3D7_0402100.1	33	48	4	38, 39, 40, 43	16	No
PF3D7_0402100.1	49	67	6	50, 54, 57, 58, 59, 62	19	No
PF3D7_0402100.1	116	131	3	121, 124, 126	16	No
PF3D7_0402100.1	304	319	3	309, 311, 314	16	No
PF3D7_0402100.1	381	396	3	386, 388, 391	16	No
PF3D7_0402100.1	542	562	7	547, 548, 550, 552, 555, 557, 562	21	No
PF3D7_0402400.1	83	97	3	88, 90, 92	15	No
PF3D7_0402400.1	161	175	3	166, 167, 170	15	No
PF3D7_0402400.1	196	210	4	201, 203, 204, 205	15	No
PF3D7_0403200.1	10	20	3	11, 15, 18	11	Yes
PF3D7_0403200.1	149	159	3	149, 154, 156	11	No
PF3D7_0403200.1	195	243	18	200, 204, 205, 207, 212, 213, 216, 217, 218, 220, 222, 223, 226, 228, 229, 234, 238, 243	49	No
PF3D7_0403200.1	350	369	7	352, 355, 358, 360, 361, 362, 364	20	No
PF3D7_0403200.1	380	398	7	385, 387, 389, 390, 391, 392, 393	19	No
PF3D7_0403200.1	407	424	6	412, 414, 415, 416, 418, 419	18	No
PF3D7_0403200.1	434	450	6	439, 440, 442, 443, 445, 449	17	No
PF3D7_0403200.1	472	493	7	475, 477, 482, 483, 485, 487, 488	22	No
PF3D7_0403600.1	17	37	6	22, 23, 26, 28, 30, 32	21	Yes
PF3D7_0403600.1	39	49	3	39, 44, 46	11	No
PF3D7_0403600.1	65	79	4	70, 72, 73, 74	15	No
PF3D7_0403600.1	128	142	3	133, 135, 137	15	No
PF3D7_0403600.1	214	235	6	219, 223, 224, 226, 230, 234	22	No
PF3D7_0403600.1	236	248	3	241, 242, 243	13	No
PF3D7_0403600.1	307	322	4	309, 312, 316, 317	16	No
PF3D7_0403600.1	344	359	4	349, 350, 353, 354	16	No
PF3D7_0403600.1	365	388	6	370, 373, 374, 380, 383, 387	24	No
PF3D7_0403600.1	422	434	3	427, 428, 429	13	No
PF3D7_0403600.1	497	510	4	502, 503, 504, 505	14	No
PF3D7_0403600.1	526	536	3	529, 531, 536	11	No
PF3D7_0403600.1	537	551	3	542, 543, 546	15	No
PF3D7_0403600.1	692	707	5	692, 697, 698, 699, 702	16	No
PF3D7_0403600.1	727	740	3	732, 734, 735	14	No
PF3D7_0403800.1	11	23	3	16, 17, 18	13	No
PF3D7_0403800.1	244	259	4	249, 251, 254, 258	16	No
PF3D7_0403800.1	336	359	10	336, 341, 342, 344, 346, 347, 349, 350, 354, 357	24	No
PF3D7_0403800.1	380	396	4	385, 386, 390, 391	17	No
PF3D7_0403800.1	405	420	4	409, 410, 415, 416	16	No
PF3D7_0403800.1	444	474	12	449, 451, 452, 453, 454, 457, 459, 464, 466, 467, 468, 469	31	No
PF3D7_0403800.1	490	515	9	495, 497, 499, 500, 502, 503, 505, 510, 511	26	No
PF3D7_0403800.1	516	531	3	521, 525, 526	16	No
PF3D7_0403800.1	532	547	3	537, 541, 542	16	No
PF3D7_0403800.1	561	575	4	561, 566, 570, 574	15	No
PF3D7_0403800.1	600	615	3	605, 609, 610	16	No
PF3D7_0403800.1	705	728	9	710, 713, 715, 716, 717, 718, 722, 723, 728	24	No
PF3D7_0404800.1	9	19	3	9, 14, 15	11	No
PF3D7_0404900.1	201	211	3	201, 206, 207	11	No
PF3D7_0404900.1	348	363	4	350, 353, 357, 358	16	No
PF3D7_0404900.1	369	378	3	374, 377, 378	10	No
PF3D7_0405100.1	84	97	3	89, 91, 92	14	No
PF3D7_0405100.1	133	147	4	138, 139, 140, 142	15	No
PF3D7_0405100.1	204	219	4	209, 210, 213, 214	16	No
PF3D7_0405100.1	273	293	6	278, 281, 282, 286, 288, 293	21	No
PF3D7_0405100.1	295	310	3	300, 304, 305	16	No
PF3D7_0405100.1	336	353	7	336, 341, 342, 343, 347, 348, 353	18	No
PF3D7_0405100.1	402	421	5	407, 408, 411, 413, 416	20	No
PF3D7_0405100.1	534	548	3	539, 540, 543	15	No
PF3D7_0405100.1	579	602	7	581, 584, 589, 591, 595, 597, 601	24	No
PF3D7_0405100.1	1039	1055	4	1044, 1045, 1048, 1050	17	No
PF3D7_0405100.1	1130	1144	3	1135, 1136, 1139	15	No
PF3D7_0405100.1	1226	1238	3	1231, 1232, 1233	13	No
PF3D7_0405200.1	24	38	3	29, 30, 33	15	No
PF3D7_0405200.1	191	206	4	196, 198, 200, 201	16	No
PF3D7_0405200.1	327	340	3	332, 333, 335	14	No
PF3D7_0405400.1	1	16	4	2, 6, 10, 11	16	No
PF3D7_0405400.1	18	31	4	19, 23, 25, 26	14	No
[truncated: 17,447 more rows]

## Sheet: PF3D7_nrHotspotMotifs_Essential
Protein	Name	Start	End	Hotspot.Length	Dual.Modification
PF3D7_0217500	CDPK1	1	12	12	Yes
PF3D7_0217500	CDPK1	12	30	19	No
PF3D7_0217500	CDPK1	92	105	14	No
PF3D7_0217500	CDPK1	211	225	15	No
PF3D7_0217500	CDPK1	464	474	11	No
PF3D7_1246400	MTIP	1	14	14	Yes
PF3D7_1246400	MTIP	46	63	18	No
PF3D7_1246400	MTIP	75	101	27	No
PF3D7_1408000	PMII	12	25	14	No
PF3D7_1408000	PMII	177	195	19	No

## Sheet: PF3D7_DuallyModifiedEssentialHo
Protein	Name	Start	End	PTM.Events.Positions	Hotspot.Length	PTM.Type	Dual.Modification	Protein.Seq	TotalPTMSites.AllHotspots
PF3D7_0217500	CDPK1	1	12	3	12	Palmitoylation	Yes	MGCSQSSNVKDFKTRRSKFTNGNNYGKSGNNKNSEDLAINPGMYVRKKEGKIGESYFKVRKLGSGAYGEVLLCREKHGHGEKAIKVIKKSQFDKMKYSITNKIECDDKIHEEIYNEISLLKSLDHPNIIKLFDVFEDKKYFYLVTEFYEGGELFEQIINRHKFDECDAANIMKQILSGICYLHKHNIVHRDIKPENILLENKHSLLNIKIVDFGLSSFFSKDNKLRDRLGTAYYIAPEVLRKKYNEKCDVWSCGVILYILLCGYPPFGGQNDQDIIKKVEKGKYYFDFNDWKNISEEAKELIKLMLTYDYNKRITAKEALNSKWIKKYANNINKSDQKTLCGALSNMRKFEGSQKLAQAAILFIGSKLTTLEERKELTDIFKKLDKNGDGQLDKKELIE…	18
PF3D7_0217500	CDPK1	1	12	4	12	Phosphorylation	Yes	MGCSQSSNVKDFKTRRSKFTNGNNYGKSGNNKNSEDLAINPGMYVRKKEGKIGESYFKVRKLGSGAYGEVLLCREKHGHGEKAIKVIKKSQFDKMKYSITNKIECDDKIHEEIYNEISLLKSLDHPNIIKLFDVFEDKKYFYLVTEFYEGGELFEQIINRHKFDECDAANIMKQILSGICYLHKHNIVHRDIKPENILLENKHSLLNIKIVDFGLSSFFSKDNKLRDRLGTAYYIAPEVLRKKYNEKCDVWSCGVILYILLCGYPPFGGQNDQDIIKKVEKGKYYFDFNDWKNISEEAKELIKLMLTYDYNKRITAKEALNSKWIKKYANNINKSDQKTLCGALSNMRKFEGSQKLAQAAILFIGSKLTTLEERKELTDIFKKLDKNGDGQLDKKELIE…	18
PF3D7_0217500	CDPK1	1	12	6	12	Phosphorylation	Yes	MGCSQSSNVKDFKTRRSKFTNGNNYGKSGNNKNSEDLAINPGMYVRKKEGKIGESYFKVRKLGSGAYGEVLLCREKHGHGEKAIKVIKKSQFDKMKYSITNKIECDDKIHEEIYNEISLLKSLDHPNIIKLFDVFEDKKYFYLVTEFYEGGELFEQIINRHKFDECDAANIMKQILSGICYLHKHNIVHRDIKPENILLENKHSLLNIKIVDFGLSSFFSKDNKLRDRLGTAYYIAPEVLRKKYNEKCDVWSCGVILYILLCGYPPFGGQNDQDIIKKVEKGKYYFDFNDWKNISEEAKELIKLMLTYDYNKRITAKEALNSKWIKKYANNINKSDQKTLCGALSNMRKFEGSQKLAQAAILFIGSKLTTLEERKELTDIFKKLDKNGDGQLDKKELIE…	18
PF3D7_0217500	CDPK1	1	12	7	12	Phosphorylation	Yes	MGCSQSSNVKDFKTRRSKFTNGNNYGKSGNNKNSEDLAINPGMYVRKKEGKIGESYFKVRKLGSGAYGEVLLCREKHGHGEKAIKVIKKSQFDKMKYSITNKIECDDKIHEEIYNEISLLKSLDHPNIIKLFDVFEDKKYFYLVTEFYEGGELFEQIINRHKFDECDAANIMKQILSGICYLHKHNIVHRDIKPENILLENKHSLLNIKIVDFGLSSFFSKDNKLRDRLGTAYYIAPEVLRKKYNEKCDVWSCGVILYILLCGYPPFGGQNDQDIIKKVEKGKYYFDFNDWKNISEEAKELIKLMLTYDYNKRITAKEALNSKWIKKYANNINKSDQKTLCGALSNMRKFEGSQKLAQAAILFIGSKLTTLEERKELTDIFKKLDKNGDGQLDKKELIE…	18
PF3D7_1246400	MTIP	1	14	5	14	Palmitoylation	Yes	MKQECNVCYFNLPDPESTLGPYDNELNYFTWGPGFEYEPEPQRKPLSIEESFENSEESEESVADIQQLEEKVDESDVRIYFNEKSSGGKISIDNASYNARKLGLAPSSIDEKKIKELYGDNLTYEQYLEYLSICVHDKDNVEELIKMFAHFDNNCTGYLTKSQMKNILTTWGDALTDQEAIDALNAFSSEDNIDYKLFCEDILQ	15
PF3D7_1246400	MTIP	1	14	8	14	Palmitoylation	Yes	MKQECNVCYFNLPDPESTLGPYDNELNYFTWGPGFEYEPEPQRKPLSIEESFENSEESEESVADIQQLEEKVDESDVRIYFNEKSSGGKISIDNASYNARKLGLAPSSIDEKKIKELYGDNLTYEQYLEYLSICVHDKDNVEELIKMFAHFDNNCTGYLTKSQMKNILTTWGDALTDQEAIDALNAFSSEDNIDYKLFCEDILQ	15
PF3D7_1246400	MTIP	1	14	9	14	Phosphorylation	Yes	MKQECNVCYFNLPDPESTLGPYDNELNYFTWGPGFEYEPEPQRKPLSIEESFENSEESEESVADIQQLEEKVDESDVRIYFNEKSSGGKISIDNASYNARKLGLAPSSIDEKKIKELYGDNLTYEQYLEYLSICVHDKDNVEELIKMFAHFDNNCTGYLTKSQMKNILTTWGDALTDQEAIDALNAFSSEDNIDYKLFCEDILQ	15

## Sheet: PF3D7_nrPTMsonDuallyModifiedEss
Protein	Isoform	Name	AAPosition	AAResidue	Source	PTM.Type					Protein	AAPosition	PTM.Type
PF3D7_1029600	PF3D7_1029600.1	ADA	264	S	Curated	Phosphorylation					PF3D7_0217500	3	Palmitoylation
PF3D7_0217500	PF3D7_0217500.1	CDPK1	64	S	Curated	Phosphorylation					PF3D7_0217500	4	Phosphorylation
PF3D7_0217500	PF3D7_0217500.1	CDPK1	217	S	Curated	Phosphorylation					PF3D7_0217500	6	Phosphorylation
PF3D7_0217500	PF3D7_0217500.1	CDPK1	4	S	Predicted	Phosphorylation					PF3D7_0217500	7	Phosphorylation
PF3D7_1408000	PF3D7_1408000.1	PMII	4	T	Predicted	Phosphorylation					PF3D7_0217500	14	Phosphorylation
PF3D7_0217500	PF3D7_0217500.1	CDPK1	6	S	Predicted	Phosphorylation					PF3D7_0217500	17	Phosphorylation
PF3D7_0217500	PF3D7_0217500.1	CDPK1	7	S	Predicted	Phosphorylation					PF3D7_0217500	20	Phosphorylation
PF3D7_1246400	PF3D7_1246400.1	MTIP	9	Y	Predicted	Phosphorylation					PF3D7_0217500	25	Phosphorylation
PF3D7_0217500	PF3D7_0217500.1	CDPK1	14	T	Predicted	Phosphorylation					PF3D7_0217500	28	Phosphorylation
PF3D7_0217500	PF3D7_0217500.1	CDPK1	17	S	Predicted	Phosphorylation					PF3D7_0217500	34	Phosphorylation
PF3D7_1408000	PF3D7_1408000.1	PMII	17	S	Predicted	Phosphorylation					PF3D7_0217500	44	Phosphorylation
PF3D7_1408000	PF3D7_1408000.1	PMII	19	S	Predicted	Phosphorylation					PF3D7_0217500	55	Phosphorylation
PF3D7_0217500	PF3D7_0217500.1	CDPK1	20	T	Predicted	Phosphorylation					PF3D7_0217500	56	Phosphorylation
PF3D7_1408000	PF3D7_1408000.1	PMII	20	T	Predicted	Phosphorylation					PF3D7_0217500	64	Phosphorylation
PF3D7_0217500	PF3D7_0217500.1	CDPK1	25	Y	Predicted	Phosphorylation					PF3D7_0217500	67	Phosphorylation
PF3D7_0217500	PF3D7_0217500.1	CDPK1	28	S	Predicted	Phosphorylation					PF3D7_0217500	90	Phosphorylation
PF3D7_1246400	PF3D7_1246400.1	MTIP	28	Y	Predicted	Phosphorylation					PF3D7_0217500	97	Phosphorylation
PF3D7_1246400	PF3D7_1246400.1	MTIP	30	T	Predicted	Phosphorylation					PF3D7_0217500	98	Phosphorylation
PF3D7_0217500	PF3D7_0217500.1	CDPK1	34	S	Predicted	Phosphorylation					PF3D7_0217500	100	Phosphorylation
PF3D7_1029600	PF3D7_1029600.1	ADA	34	Y	Predicted	Phosphorylation					PF3D7_0217500	118	Phosphorylation
PF3D7_1246400	PF3D7_1246400.1	MTIP	37	Y	Predicted	Phosphorylation					PF3D7_0217500	177	Phosphorylation
PF3D7_0217500	PF3D7_0217500.1	CDPK1	44	Y	Predicted	Phosphorylation					PF3D7_0217500	181	Phosphorylation
PF3D7_1246400	PF3D7_1246400.1	MTIP	47	S	Predicted	Phosphorylation					PF3D7_0217500	216	Phosphorylation
PF3D7_1246400	PF3D7_1246400.1	MTIP	51	S	Predicted	Phosphorylation					PF3D7_0217500	217	Phosphorylation
PF3D7_0217500	PF3D7_0217500.1	CDPK1	55	S	Predicted	Phosphorylation					PF3D7_0217500	220	Phosphorylation
PF3D7_1246400	PF3D7_1246400.1	MTIP	55	S	Predicted	Phosphorylation					PF3D7_0217500	231	Phosphorylation
PF3D7_0217500	PF3D7_0217500.1	CDPK1	56	Y	Predicted	Phosphorylation					PF3D7_0217500	244	Phosphorylation
PF3D7_1246400	PF3D7_1246400.1	MTIP	58	S	Predicted	Phosphorylation					PF3D7_0217500	335	Phosphorylation
PF3D7_1246400	PF3D7_1246400.1	MTIP	61	S	Predicted	Phosphorylation					PF3D7_0217500	339	Phosphorylation
PF3D7_0217500	PF3D7_0217500.1	CDPK1	64	S	Predicted	Phosphorylation					PF3D7_0217500	345	Phosphorylation
PF3D7_0217500	PF3D7_0217500.1	CDPK1	67	Y	Predicted	Phosphorylation					PF3D7_0217500	353	Phosphorylation
PF3D7_1246400	PF3D7_1246400.1	MTIP	75	S	Predicted	Phosphorylation					PF3D7_0217500	369	Phosphorylation
PF3D7_1408000	PF3D7_1408000.1	PMII	77	S	Predicted	Phosphorylation					PF3D7_0217500	378	Phosphorylation
PF3D7_1246400	PF3D7_1246400.1	MTIP	80	Y	Predicted	Phosphorylation					PF3D7_0217500	406	Phosphorylation
PF3D7_1408000	PF3D7_1408000.1	PMII	81	T	Predicted	Phosphorylation					PF3D7_0217500	466	Phosphorylation
PF3D7_1246400	PF3D7_1246400.1	MTIP	85	S	Predicted	Phosphorylation					PF3D7_0217500	469	Phosphorylation
PF3D7_1246400	PF3D7_1246400.1	MTIP	86	S	Predicted	Phosphorylation					PF3D7_0217500	473	Phosphorylation
PF3D7_0217500	PF3D7_0217500.1	CDPK1	90	S	Predicted	Phosphorylation					PF3D7_0217500	484	Phosphorylation
PF3D7_1246400	PF3D7_1246400.1	MTIP	91	S	Predicted	Phosphorylation					PF3D7_0217500	487	Phosphorylation
PF3D7_1246400	PF3D7_1246400.1	MTIP	96	S	Predicted	Phosphorylation					PF3D7_0217500	523	Phosphorylation
PF3D7_1408000	PF3D7_1408000.1	PMII	96	T	Predicted	Phosphorylation					PF3D7_0217500	524	Phosphorylation
PF3D7_0217500	PF3D7_0217500.1	CDPK1	97	Y	Predicted	Phosphorylation					PF3D7_1029600	3	Palmitoylation
PF3D7_1246400	PF3D7_1246400.1	MTIP	97	Y	Predicted	Phosphorylation					PF3D7_1029600	34	Phosphorylation
PF3D7_0217500	PF3D7_0217500.1	CDPK1	98	S	Predicted	Phosphorylation					PF3D7_1029600	135	Phosphorylation
PF3D7_0217500	PF3D7_0217500.1	CDPK1	100	T	Predicted	Phosphorylation					PF3D7_1029600	138	Phosphorylation
PF3D7_1246400	PF3D7_1246400.1	MTIP	107	S	Predicted	Phosphorylation					PF3D7_1029600	174	Phosphorylation
PF3D7_1246400	PF3D7_1246400.1	MTIP	108	S	Predicted	Phosphorylation					PF3D7_1029600	180	Phosphorylation
PF3D7_0217500	PF3D7_0217500.1	CDPK1	118	S	Predicted	Phosphorylation					PF3D7_1029600	201	Phosphorylation
PF3D7_1029600	PF3D7_1029600.1	ADA	135	S	Predicted	Phosphorylation					PF3D7_1029600	226	Phosphorylation
PF3D7_1029600	PF3D7_1029600.1	ADA	138	S	Predicted	Phosphorylation					PF3D7_1029600	228	Phosphorylation
PF3D7_1408000	PF3D7_1408000.1	PMII	159	T	Predicted	Phosphorylation					PF3D7_1029600	236	Phosphorylation
PF3D7_1408000	PF3D7_1408000.1	PMII	168	S	Predicted	Phosphorylation					PF3D7_1029600	262	Phosphorylation
PF3D7_1029600	PF3D7_1029600.1	ADA	174	T	Predicted	Phosphorylation					PF3D7_1029600	264	Phosphorylation
PF3D7_1246400	PF3D7_1246400.1	MTIP	176	T	Predicted	Phosphorylation					PF3D7_1029600	310	Phosphorylation
PF3D7_0217500	PF3D7_0217500.1	CDPK1	177	S	Predicted	Phosphorylation					PF3D7_1029600	313	Phosphorylation
PF3D7_1029600	PF3D7_1029600.1	ADA	180	S	Predicted	Phosphorylation					PF3D7_1029600	352	Phosphorylation
PF3D7_0217500	PF3D7_0217500.1	CDPK1	181	Y	Predicted	Phosphorylation					PF3D7_1246400	5	Palmitoylation
PF3D7_1408000	PF3D7_1408000.1	PMII	182	Y	Predicted	Phosphorylation					PF3D7_1246400	8	Palmitoylation
PF3D7_1408000	PF3D7_1408000.1	PMII	184	S	Predicted	Phosphorylation					PF3D7_1246400	9	Phosphorylation
PF3D7_1408000	PF3D7_1408000.1	PMII	185	S	Predicted	Phosphorylation					PF3D7_1246400	28	Phosphorylation
PF3D7_1408000	PF3D7_1408000.1	PMII	187	S	Predicted	Phosphorylation					PF3D7_1246400	30	Phosphorylation
PF3D7_1246400	PF3D7_1246400.1	MTIP	188	S	Predicted	Phosphorylation					PF3D7_1246400	37	Phosphorylation
PF3D7_1246400	PF3D7_1246400.1	MTIP	189	S	Predicted	Phosphorylation					PF3D7_1246400	47	Phosphorylation
PF3D7_1408000	PF3D7_1408000.1	PMII	189	T	Predicted	Phosphorylation					PF3D7_1246400	51	Phosphorylation
PF3D7_1408000	PF3D7_1408000.1	PMII	190	Y	Predicted	Phosphorylation					PF3D7_1246400	55	Phosphorylation
PF3D7_1408000	PF3D7_1408000.1	PMII	195	T	Predicted	Phosphorylation					PF3D7_1246400	58	Phosphorylation
PF3D7_1029600	PF3D7_1029600.1	ADA	201	Y	Predicted	Phosphorylation					PF3D7_1246400	61	Phosphorylation
PF3D7_0217500	PF3D7_0217500.1	CDPK1	216	S	Predicted	Phosphorylation					PF3D7_1246400	75	Phosphorylation
PF3D7_0217500	PF3D7_0217500.1	CDPK1	217	S	Predicted	Phosphorylation					PF3D7_1246400	80	Phosphorylation
PF3D7_0217500	PF3D7_0217500.1	CDPK1	220	S	Predicted	Phosphorylation					PF3D7_1246400	85	Phosphorylation
PF3D7_1029600	PF3D7_1029600.1	ADA	226	S	Predicted	Phosphorylation					PF3D7_1246400	86	Phosphorylation
PF3D7_1029600	PF3D7_1029600.1	ADA	228	S	Predicted	Phosphorylation					PF3D7_1246400	91	Phosphorylation
PF3D7_0217500	PF3D7_0217500.1	CDPK1	231	T	Predicted	Phosphorylation					PF3D7_1246400	96	Phosphorylation
PF3D7_1029600	PF3D7_1029600.1	ADA	236	S	Predicted	Phosphorylation					PF3D7_1246400	97	Phosphorylation
PF3D7_0217500	PF3D7_0217500.1	CDPK1	244	Y	Predicted	Phosphorylation					PF3D7_1246400	107	Phosphorylation
PF3D7_1029600	PF3D7_1029600.1	ADA	262	S	Predicted	Phosphorylation					PF3D7_1246400	108	Phosphorylation
PF3D7_1029600	PF3D7_1029600.1	ADA	310	S	Predicted	Phosphorylation					PF3D7_1246400	176	Phosphorylation
PF3D7_1029600	PF3D7_1029600.1	ADA	313	S	Predicted	Phosphorylation					PF3D7_1246400	188	Phosphorylation
PF3D7_0217500	PF3D7_0217500.1	CDPK1	335	S	Predicted	Phosphorylation					PF3D7_1246400	189	Phosphorylation
PF3D7_0217500	PF3D7_0217500.1	CDPK1	339	T	Predicted	Phosphorylation					PF3D7_1408000	4	Phosphorylation
PF3D7_0217500	PF3D7_0217500.1	CDPK1	345	S	Predicted	Phosphorylation					PF3D7_1408000	17	Phosphorylation
PF3D7_1029600	PF3D7_1029600.1	ADA	352	S	Predicted	Phosphorylation					PF3D7_1408000	19	Phosphorylation
PF3D7_0217500	PF3D7_0217500.1	CDPK1	353	S	Predicted	Phosphorylation					PF3D7_1408000	20	Phosphorylation
PF3D7_0217500	PF3D7_0217500.1	CDPK1	369	T	Predicted	Phosphorylation					PF3D7_1408000	77	Phosphorylation
PF3D7_0217500	PF3D7_0217500.1	CDPK1	378	T	Predicted	Phosphorylation					PF3D7_1408000	81	Phosphorylation
PF3D7_1408000	PF3D7_1408000.1	PMII	384	T	Predicted	Phosphorylation					PF3D7_1408000	96	Phosphorylation
PF3D7_1408000	PF3D7_1408000.1	PMII	385	S	Predicted	Phosphorylation					PF3D7_1408000	159	Phosphorylation
PF3D7_0217500	PF3D7_0217500.1	CDPK1	406	S	Predicted	Phosphorylation					PF3D7_1408000	168	Phosphorylation
PF3D7_1408000	PF3D7_1408000.1	PMII	433	Y	Predicted	Phosphorylation					PF3D7_1408000	182	Phosphorylation
PF3D7_1408000	PF3D7_1408000.1	PMII	439	Y	Predicted	Phosphorylation					PF3D7_1408000	184	Phosphorylation
PF3D7_0217500	PF3D7_0217500.1	CDPK1	466	T	Predicted	Phosphorylation					PF3D7_1408000	185	Phosphorylation
PF3D7_0217500	PF3D7_0217500.1	CDPK1	469	S	Predicted	Phosphorylation					PF3D7_1408000	187	Phosphorylation
PF3D7_0217500	PF3D7_0217500.1	CDPK1	473	T	Predicted	Phosphorylation					PF3D7_1408000	189	Phosphorylation
PF3D7_0217500	PF3D7_0217500.1	CDPK1	484	T	Predicted	Phosphorylation					PF3D7_1408000	190	Phosphorylation
PF3D7_0217500	PF3D7_0217500.1	CDPK1	487	S	Predicted	Phosphorylation					PF3D7_1408000	195	Phosphorylation
PF3D7_0217500	PF3D7_0217500.1	CDPK1	523	S	Predicted	Phosphorylation					PF3D7_1408000	373	Palmitoylation
PF3D7_0217500	PF3D7_0217500.1	CDPK1	524	S	Predicted	Phosphorylation					PF3D7_1408000	384	Phosphorylation
PF3D7_0217500	PF3D7_0217500.1	CDPK1	3	C	Predicted	Palmitoylation					PF3D7_1408000	385	Phosphorylation
PF3D7_1029600	PF3D7_1029600.1	ADA	3	C	Predicted	Palmitoylation					PF3D7_1408000	433	Phosphorylation
PF3D7_1246400	PF3D7_1246400.1	MTIP	5	C	Predicted	Palmitoylation					PF3D7_1408000	439	Phosphorylation
PF3D7_1246400	PF3D7_1246400.1	MTIP	8	C	Predicted	Palmitoylation
PF3D7_1408000	PF3D7_1408000.1	PMII	373	C	Predicted	Palmitoylation
