# Supplementary material for: Complementary crosstalk between palmitoylation and phosphorylation events in MTIP regulates its role during Plasmodium falciparum invasion
Source: Front Cell Infect Microbiol. 2022 Sep 29;12:924424. doi: 10.3389/fcimb.2022.924424 (PMC9556994; doi:10.3389/fcimb.2022.924424)
Supplement: Supplementary Table 9 — A tabular representation of the physical PPI map constituting the Glideosome motor complex of Plasmodium falciparum 3D7 as nodes for the Cytohubba based identification of top interactors. [file Table_9.xlsx]

## Sheet: PF3D7_GlideosomePPI_STRING
Protein1	Name1	Protein2	Name2	homology	experimentally_determined_interaction	database_annotated	automated_textmining	combined_score
PF3D7_0918000	GAP50	PF3D7_1222700	GAP45	0	0	0	0.978	0.978
PF3D7_0515700	GAP40	PF3D7_1222700	GAP45	0	0	0	0.859	0.859
PF3D7_1246400	MTIP	PF3D7_1222700	GAP45	0	0	0	0.715	0.715
PF3D7_1246400	MTIP	PF3D7_1342600	MyoA	0	0.86	0	0.883	0.983
PF3D7_1246400	MTIP	PF3D7_1017500	ELC	0	0.8	0	0	0.8
PF3D7_1222700	GAP45	PF3D7_1342600	MyoA	0	0	0	0.889	0.889
PF3D7_1436600	PKG	PF3D7_1360500	GCbeta	0	0.292	0.543	0.234	0.731
PF3D7_1342600	MyoA	PF3D7_1017500	ELC	0	0.8	0	0	0.8

## Sheet: PF3D7_CytoHubbaRanksofGlideosom
Top 8 in network string_interactions_short (phys).tsv ranked by MCC method
Rank	Name	Protein	Name2	Score
1	Q8IDR3	PF3D7_1342600	MyoA	4
1	Q8I5I8	PF3D7_1222700	GAP45	4
1	Q8I4W8	PF3D7_1246400	MTIP	4
4	Q8IJM4	PF3D7_1017500	ELC	2
5	Q8I2X3	PF3D7_0918000	GAP50	1
5	Q8I719	PF3D7_1436600	PKG	1
5	Q8IDA0	PF3D7_1360500	GCbeta	1
5	Q8I3V1	PF3D7_0515700	GAP40	1

## Sheet: STRINGmappedIDs_GlideosomePhysi
queryItem	Name	stringId	preferredName	annotation
PF3D7_0310100	CDPK3	36329.Q9NJU9	CPK3	Calcium-dependent protein kinase 3; Calcium-dependent kinase that may play a role in the sexual reproduction and mosquito transmission of P.falciparum.
PF3D7_0423500	GAPM2	36329.Q8IFN1	Q8IFN1	Glideosome associated protein with multiple membrane spans 2
PF3D7_0515700	GAP40	36329.Q8I3V1	Q8I3V1	Glideosome-associated protein 40, putative
PF3D7_0708600	IMC1d	36329.Q8IC03	Q8IC03	Inner membrane complex protein 1d, putative
PF3D7_0717500	CDPK4	36329.Q8IBS5	CPK4	Calcium-dependent protein kinase 4; Calcium-dependent kinase that plays a central role in the sexual reproduction and mosquito transmission of P.falciparum. Required for cell cycle progression in the male gametocyte, an essential step in parasite transmission to the mosquito (By similarity).
PF3D7_0719500	CDC50A	36329.A0A143ZVJ8	A0A143ZVJ8	LEM3/CDC50 family protein, putative
PF3D7_0823500	IMC1i	36329.Q8IB69	Q8IB69	Inner membrane complex protein 1i, putative
PF3D7_0918000	GAP50	36329.Q8I2X3	Q8I2X3	Glideosome-associated protein 50
PF3D7_1003600	IMC1c	36329.Q8IK01	Q8IK01	Inner membrane complex protein 1c, putative
PF3D7_1011000	ISP1	36329.Q8IJT5	Q8IJT5	Inner membrane complex sub-compartment protein 1
PF3D7_1017500	ELC	36329.Q8IJM4	Q8IJM4	Myosin essential light chain ELC
PF3D7_1222700	GAP45	36329.Q8I5I8	Q8I5I8	Glideosome-associated protein 45
PF3D7_1246400	MTIP	36329.Q8I4W8	Q8I4W8	Myosin A tail domain interacting protein
PF3D7_1323700	GAPM1	36329.Q8IE80	Q8IE80	Glideosome associated protein with multiple membrane spans 1
PF3D7_1342600	MyoA	36329.Q8IDR3	Q8IDR3	Myosin-A; Myosins are actin-based motor molecules with ATPase activity. Unconventional myosins serve in intracellular movements. Their highly divergent tails are presumed to bind to membranous compartments, which would be moved relative to actin filaments (By similarity).
PF3D7_1360500	GCbeta	36329.Q8IDA0	Q8IDA0	Guanylyl cyclase beta
PF3D7_1406800	GAPM3	36329.Q8IM26	Q8IM26	Glideosome associated protein with multiple membrane spans 3
PF3D7_1436600	PKG	36329.Q8I719	Q8I719	cGMP-dependent protein kinase
PF3D7_1470500	PDEdelta	36329.Q8IKD3	PDEdelta	Phosphodiesterase
